# Supplementary material for: Detection and Validation of QTL Affecting Bacterial Cold Water Disease Resistance in Rainbow Trout Using Restriction-Site Associated DNA Sequencing
Source: PLoS One. 2015 Sep 16;10(9):e0138435. doi: 10.1371/journal.pone.0138435 (PMC4574402; doi:10.1371/journal.pone.0138435)
Supplement: S1 File — (XLSX) [file pone.0138435.s001.xlsx]

## Sheet: 1) Map Summary
Omy	No. of Markers	No. of SNPs	No. of Microsatellites	Map Length (Sex Averaged) (cM)	Average Resolution (cM)	No. of Markers by 2-point
1	47	39	8	102	2.17021	277
2	46	41	5	99.7	2.16739	281
3	58	53	5	110	1.89655	264
4	57	48	9	151.8	2.66316	277
5	51	44	7	226.3	4.43725	368
6	49	41	8	130	2.65306	248
7	61	47	14	148.9	2.44098	243
8	40	29	11	89	2.225	221
9	42	32	10	123.5	2.94048	189
10	34	25	9	138.8	4.08235	199
11	45	39	6	141.5	3.14444	269
12	59	49	10	145	2.45763	283
13	35	30	5	109.4	3.12571	143
14	36	27	9	115.9	3.21944	195
15	35	28	7	144.6	4.13143	151
16	36	30	6	125.1	3.475	227
17	51	39	12	131.2	2.57255	206
18	31	27	4	141.7	4.57097	158
19	49	43	6	158.4	3.23265	204
20	39	34	5	126.6	3.24615	139
21	37	30	7	118.2	3.19459	144
22	36	29	7	106.2	2.95	133
23	24	21	3	86.4	3.6	102
24	29	24	5	111.8	3.85517	152
25	48	39	9	121.3	2.52708	279
26	21	17	4	87.3	4.15714	111
27	29	26	3	108.2	3.73103	121
28	22	17	5	99	4.5	126
29 (SEX)	20	15	5	90.2	4.51	141
Total	1167	963	204	3588	93.8775	5851
Average	40.2414	33.2069	7.03448	123.724	3.23715	201.759
Min	20	15	3	86.4	1.89655	102
Max	61	53	14	226.3	4.57097	368

## Sheet: 2) LGs_2-Point
Chr1	Chr2	Chr3	Chr4	Chr5	Chr6	Chr7	Chr8	Chr9	Chr10	Chr11	Chr12	Chr13	Chr14	Chr15	Chr16	Chr17	Chr18	Chr19	Chr20	Chr21	Chr22	Chr23	Chr24	Chr25	Chr26	Chr27	Chr28	Chr29
RM20090706845	RM20090706839	RM20090706833	RM20090706843	RM20090706853	RM20090706830	RM20090706820	RM20090706828	RM20090706800	RM20090706840	RM20090706837	RM20090706832	RM20090706829	RM20090706795	RM20090706846	RM20090706835	RM20090706818	SSA119NVH	RM20090706816	RM20090706848	RM20090706788	RM20090706772	RM20090706749	RM20090706849	SSA0035	RM20090706697	RM20090706842	RM20090706790	RM20090706786
RM20090706813	RM20090706785	RM20090706805	RM20090706831	RM20090706841	RM20090706821	RM20090706810	RM20090706815	RM20090706784	RM20090706838	RM20090706737	RM20090706771	RM20090706752	RM20090706770	RM20090706824	RM20090706819	RM20090706792	RM20090706850	RM20090706804	RM20090706742	RM20090706781	RM20090706768	RM20090706634	RM20090706793	RM20090706844	RM20090706656	RM20090706777	RM20090706738	RM20090706779
RM20090706812	RM20090706727	RM20090706798	RM20090706808	RM20090706827	RM20090706799	RM20090706794	RM20090706787	RM20090706776	RM20090706814	RM20090706694	RM20090706756	RM20090706712	RM20090706744	RM20090706757	RM20090706802	RM20090706707	RM20090706823	RM20090706762	RM20090706729	RM20090706764	RM20090706759	RM20090706620	RM20090706774	RM20090706796	RM20090706559	RM20090706681	RM20090706736	RM20090706750
RM20090706760	RM20090706704	RM20090706763	RM20090706807	RM20090706783	RM20090706791	RM20090706719	RM20090706754	RM20090706761	RM20090706715	RM20090706691	RM20090706751	RM20090706689	RM20090706706	RM20090706740	RM20090706720	RM20090706695	RM20090706789	RM20090706733	RM20090706663	RM20090706674	RM20090706685	RM20090706604	RM20090706731	RM20090706743	RM20090706541	RM20090706577	RM20090706726	RM20090706647
RM20090706755	RM20090706700	RM20090706748	RM20090706806	RM20090706778	RM20090706782	RM20090706699	RM20090706732	RM20090706686	RM20090706639	RM20090706666	RM20090706677	RM20090706649	RM20090706658	RM20090706611	RM20090706701	RM20090706637	RM20090706780	RM20090706716	RM20090706616	RM20090706668	RM20090706624	RM20090706461	RM20090706592	RM20090706671	RM20090706531	RM20090706568	RM20090706705	RM20090706629
RM20090706711	RM20090706675	RM20090706722	RM20090706659	RM20090706765	RM20090706725	RM20090706698	RM20090706688	RM20090706650	RM20090706618	RM20090706571	RM20090706667	RM20090706603	RM20090706654	RM20090706542	RM20090706642	RM20090706605	RM20090706775	RM20090706569	RM20090706614	RM20090706640	RM20090706563	RM20090706411	RM20090706579	RM20090706670	RM20090706506	RM20090706520	RM20090706702	RM20090706473
RM20090706708	RM20090706673	RM20090706721	RM20090706648	RM20090706753	RM20090706713	RM20090706636	RM20090706610	RM20090706589	RM20090706581	RM20090706522	RM20090706657	RM20090706588	RM20090706586	RM20090706526	RM20090706632	RM20090706602	RM20090706747	RM20090706466	RM20090706556	RM20090706638	RM20090706517	RM20090706377	RM20090706572	RM20090706661	RM20090706408	RM20090706376	RM20090706693	RM20090706455
RM20090706684	RM20090706644	RM20090706709	RM20090706643	RM20090706730	RM20090706710	RM20090706550	RM20090706565	RM20090706470	RM20090706496	RM20090706512	RM20090706651	RM20090706554	RM20090706538	RM20090706519	RM20090706617	RM20090706575	RM20090706741	RM20090706460	RM20090706492	RM20090706626	RM20090706352	RM20090706370	RM20090706558	RM20090706621	RM20090706268	RM20090706280	RM20090706567	RM20090706289
RM20090706672	RM20090706625	RM20090706683	RM20090706635	RM20090706728	RM20090706653	RM20090706529	RM20090706516	RM20090706424	RM20090706471	RM20090706449	RM20090706591	RM20090706437	RM20090706535	RM20090706493	RM20090706570	RM20090706540	RM20090706692	RM20090706415	RM20090706481	RM20090706600	RM20090706190	RM20090706282	RM20090706543	RM20090706612	RM20090706247	RM20090706203	RM20090706560	RM20090706272
RM20090706590	RM20090706537	RM20090706669	RM20090706595	RM20090706724	RM20090706646	RM20090706502	RM20090706436	RM20090706379	RM20090706409	RM20090706445	RM20090706582	RM20090706430	RM20090706510	RM20090706435	RM20090706514	RM20090706500	RM20090706682	RM20090706401	RM20090706410	RM20090706598	RM20090706172	RM20090706179	RM20090706468	RM20090706601	RM20090706221	RM20090706034	RM20090706525	RM20090706158
RM20090706548	RM20090706505	RM20090706578	RM20090706587	RM20090706690	RM20090706623	RM20090706422	RM20090706418	RM20090706312	RM20090706327	RM20090706406	RM20090706534	RM20090706398	RM20090706478	RM20090706429	RM20090706486	RM20090706495	RM20090706630	RM20090706359	RM20090706403	RM20090706546	RM20090706012	RM20090706143	RM20090706439	RM20090706594	RM20090706213	RM20090705965	RM20090706507	RM20090706124
RM20090706523	RM20090706497	RM20090706561	RM20090706583	RM20090706680	RM20090706584	RM20090706397	RM20090706383	RM20090706279	RM20090706297	RM20090706402	RM20090706509	RM20090706306	RM20090706477	RM20090706388	RM20090706485	RM20090706488	RM20090706606	RM20090706336	RM20090706392	RM20090706508	RM20090705883	RM20090706133	RM20090706416	RM20090706573	RM20090706205	RM20090705831	RM20090706467	RM20090706035
RM20090706521	RM20090706456	RM20090706479	RM20090706547	RM20090706678	RM20090706551	RM20090706356	RM20090706300	RM20090706201	RM20090706284	RM20090706378	RM20090706503	RM20090706254	RM20090706453	RM20090706244	RM20090706484	RM20090706472	RM20090706533	RM20090706311	RM20090706364	RM20090706434	RM20090705882	RM20090706097	RM20090706399	RM20090706518	RM20090706197	RM20090705780	RM20090706441	RM20090706015
RM20090706483	RM20090706396	RM20090706443	RM20090706528	RM20090706655	RM20090706545	RM20090706338	RM20090706296	RM20090706167	RM20090706270	RM20090706346	RM20090706487	RM20090706185	RM20090706419	RM20090706236	RM20090706482	RM20090706433	RM20090706504	RM20090706308	RM20090706322	RM20090706389	RM20090705803	RM20090705889	RM20090706283	RM20090706515	RM20090706195	RM20090705730	RM20090706371	RM20090705991
RM20090706428	RM20090706394	RM20090706420	RM20090706499	RM20090706645	RM20090706490	RM20090706335	RM20090706276	RM20090706146	RM20090706187	RM20090706339	RM20090706446	RM20090706166	RM20090706390	RM20090706170	RM20090706469	RM20090706384	RM20090706501	RM20090706304	RM20090706321	RM20090706365	RM20090705697	RM20090705808	RM20090706186	RM20090706491	RM20090706188	RM20090705652	RM20090706357	RM20090705930
RM20090706319	RM20090706386	RM20090706369	RM20090706440	RM20090706633	RM20090706393	RM20090706209	RM20090706230	RM20090706087	RM20090706184	RM20090706328	RM20090706426	RM20090706160	RM20090706373	RM20090706072	RM20090706462	RM20090706325	RM20090706307	RM20090706299	RM20090706294	RM20090706341	RM20090705690	RM20090705805	RM20090706054	RM20090706480	RM20090706081	RM20090705609	RM20090706220	RM20090705927
RM20090706199	RM20090706385	RM20090706358	RM20090706425	RM20090706622	RM20090706361	RM20090706206	RM20090706219	RM20090706040	RM20090706164	RM20090706326	RM20090706381	RM20090706151	RM20090706337	RM20090706019	RM20090706457	RM20090706323	RM20090706210	RM20090706298	RM20090706261	RM20090706274	RM20090705677	RM20090705661	RM20090706050	RM20090706454	RM20090705847	RM20090705543	RM20090706189	RM20090705910
RM20090706198	RM20090706380	RM20090706349	RM20090706414	RM20090706615	RM20090706350	RM20090706183	RM20090706178	RM20090705959	RM20090706139	RM20090706305	RM20090706375	RM20090706033	RM20090706314	RM20090706000	RM20090706451	RM20090706234	RM20090706165	RM20090706295	RM20090706258	RM20090706223	RM20090705532	RM20090705657	RM20090705999	RM20090706438	RM20090705821	RM20090705523	RM20090706074	RM20090705894
RM20090706180	RM20090706309	RM20090706347	RM20090706315	RM20090706555	RM20090706334	RM20090706032	RM20090706104	RM20090705902	RM20090706131	RM20090706302	RM20090706367	RM20090705963	RM20090706227	RM20090705983	RM20090706448	RM20090706217	RM20090706147	RM20090706292	RM20090706249	RM20090706153	RM20090705464	RM20090705643	RM20090705995	RM20090706413	RM20090705754	RM20090705503	RM20090705945	RM20090705891
RM20090706136	RM20090706301	RM20090706316	RM20090706278	RM20090706532	RM20090706329	RM20090706028	RM20090706086	RM20090705845	RM20090706126	RM20090706290	RM20090706285	RM20090705937	RM20090706182	RM20090705849	RM20090706442	RM20090706215	RM20090706112	RM20090706288	RM20090706176	RM20090706150	RM20090705406	RM20090705386	RM20090705954	RM20090706387	RM20090705695	RM20090705311	RM20090705841	RM20090705876
RM20090706123	RM20090706240	RM20090706238	RM20090706256	RM20090706498	RM20090706318	RM20090706026	RM20090706066	RM20090705741	RM20090706111	RM20090706241	RM20090706262	RM20090705929	RM20090706149	RM20090705799	RM20090706351	RM20090706094	RM20090706089	RM20090706191	RM20090706068	RM20090706002	RM20090705357	RM20090705305	RM20090705819	RM20090706310	RM20090705623	RM20090705218	RM20090705651	RM20090705766
RM20090706108	RM20090706237	RM20090706214	RM20090706168	RM20090706494	RM20090706287	RM20090705992	RM20090706057	RM20090705632	RM20090706102	RM20090706159	RM20090706239	RM20090705878	RM20090706142	RM20090705704	RM20090706324	RM20090706065	RM20090706051	RM20090706125	RM20090705986	RM20090705870	RM20090705351	RM20090705182	RM20090705802	RM20090706293	RM20090705574	RM20090705211	RM20090705544	RM20090705757
RM20090706100	RM20090706232	RM20090706194	RM20090706145	RM20090706465	RM20090706275	RM20090705988	RM20090706053	RM20090705573	RM20090706062	RM20090706144	RM20090706235	RM20090705867	RM20090706107	RM20090705611	RM20090706267	RM20090705980	RM20090706043	RM20090706090	RM20090705939	RM20090705840	RM20090705336	RM20090705122	RM20090705742	RM20090706269	RM20090705545	RM20090705141	RM20090705501	RM20090705667
RM20090706098	RM20090706228	RM20090706157	RM20090706129	RM20090706458	RM20090706255	RM20090705920	RM20090706014	RM20090705569	RM20090706052	RM20090706141	RM20090706231	RM20090705784	RM20090706056	RM20090705603	RM20090706212	RM20090705935	RM20090706036	RM20090706037	RM20090705854	RM20090705781	RM20090705312	RM20090705111	RM20090705728	RM20090706252	RM20090705473	RM20090705131	RM20090705466	RM20090705618
RM20090706092	RM20090706224	RM20090706156	RM20090706099	RM20090706447	RM20090706251	RM20090705880	RM20090705977	RM20090705564	RM20090705948	RM20090706137	RM20090706225	RM20090705649	RM20090706038	RM20090705552	RM20090706193	RM20090705839	RM20090706013	RM20090706008	RM20090705670	RM20090705665	RM20090705170	RM20090705075	RM20090705700	RM20090706245	RM20090705463	RM20090705114	RM20090705334	RM20090705615
RM20090706076	RM20090706211	RM20090706155	RM20090706064	RM20090706444	RM20090706192	RM20090705873	RM20090705967	RM20090705528	RM20090705934	RM20090706027	RM20090706222	RM20090705575	RM20090706018	RM20090705397	RM20090706148	RM20090705834	RM20090705990	RM20090705973	RM20090705589	RM20090705561	RM20090705077	RM20090705072	RM20090705673	RM20090706243	RM20090705449	RM20090705056	RM20090705249	RM20090705530
RM20090706067	RM20090706196	RM20090706093	RM20090706046	RM20090706432	RM20090706174	RM20090705862	RM20090705966	RM20090705504	RM20090705933	RM20090706020	RM20090706208	RM20090705570	RM20090706005	RM20090705344	RM20090706140	RM20090705758	RM20090705901	RM20090705897	RM20090705579	RM20090705388	RM20090705020	RM20090705019	RM20090705598	RM20090706242	RM20090705444	RM20090705045	RM20090705168	RM20090705517
RM20090706061	RM20090706177	RM20090706085	RM20090706007	RM20090706417	RM20090706132	RM20090705829	RM20090705953	RM20090705478	RM20090705892	RM20090705972	RM20090706202	RM20090705529	RM20090705979	RM20090705274	RM20090706082	RM20090705753	RM20090705731	RM20090705895	RM20090705541	RM20090705285	RM20090704998	RM20090704874	RM20090705536	RM20090706204	RM20090705367	RM20090704685	RM20090705161	RM20090705455
RM20090706045	RM20090706163	RM20090706071	RM20090705956	RM20090706407	RM20090706128	RM20090705825	RM20090705932	RM20090705439	RM20090705817	RM20090705958	RM20090706169	RM20090705505	RM20090705950	RM20090705273	RM20090706059	RM20090705745	RM20090705724	RM20090705890	RM20090705467	RM20090705243	RM20090704984	RM20090704831	RM20090705476	RM20090706101	RM20090705359	RM20090704631	RM20090705136	RM20090705324
RM20090705993	RM20090706117	RM20090706063	RM20090705912	RM20090706400	RM20090706096	RM20090705822	RM20090705918	RM20090705434	RM20090705735	RM20090705952	RM20090706120	RM20090705493	RM20090705936	RM20090705240	RM20090705976	RM20090705701	RM20090705648	RM20090705853	RM20090705383	RM20090705212	RM20090704925	RM20090704795	RM20090705421	RM20090706083	RM20090705332	RM20090704600	RM20090705117	RM20090705313
RM20090705969	RM20090706110	RM20090706042	RM20090705888	RM20090706395	RM20090706047	RM20090705787	RM20090705913	RM20090705362	RM20090705715	RM20090705946	RM20090706078	RM20090705445	RM20090705859	RM20090705223	RM20090705923	RM20090705689	RM20090705581	RM20090705832	RM20090705363	RM20090705197	RM20090704881	RM20090704790	RM20090705416	RM20090706055	RM20090705306	RM20090704559	RM20090705059	RM20090705291
RM20090705921	RM20090706109	RM20090706029	RM20090705857	RM20090706374	RM20090706039	RM20090705759	RM20090705911	RM20090705339	RM20090705662	RM20090705924	RM20090706049	RM20090705442	RM20090705797	RM20090705162	RM20090705915	RM20090705613	RM20090705546	RM20090705795	RM20090705270	RM20090705169	RM20090704865	RM20090704785	RM20090705373	RM20090706031	RM20090705266	RM20090704296	RM20090704961	RM20090705214
RM20090705906	RM20090706095	RM20090705951	RM20090705838	RM20090706363	RM20090705984	RM20090705640	RM20090705886	RM20090705298	RM20090705653	RM20090705905	RM20090706048	RM20090705440	RM20090705765	RM20090705094	RM20090705884	RM20090705583	RM20090705494	RM20090705777	RM20090705180	RM20090705097	RM20090704837	RM20090704712	RM20090705294	RM20090706025	RM20090705230	RM20090704263	RM20090704958	RM20090705082
RM20090705872	RM20090706069	RM20090705941	RM20090705826	RM20090706360	RM20090705931	RM20090705634	RM20090705851	RM20090705225	RM20090705582	RM20090705835	RM20090706006	RM20090705417	RM20090705750	RM20090705083	RM20090705801	RM20090705526	RM20090705485	RM20090705683	RM20090705157	RM20090705084	RM20090704717	RM20090704706	RM20090705248	RM20090706024	RM20090705204	RM20090704217	RM20090704953	RM20090705050
RM20090705858	RM20090706060	RM20090705940	RM20090705793	RM20090706348	RM20090705887	RM20090705620	RM20090705816	RM20090705172	RM20090705568	RM20090705800	RM20090705981	RM20090705237	RM20090705716	RM20090705008	RM20090705740	RM20090705518	RM20090705480	RM20090705681	RM20090705135	RM20090705062	RM20090704694	RM20090704639	RM20090705208	RM20090706016	RM20090705198	RM20090704205	RM20090704943	RM20090705030
RM20090705844	RM20090706058	RM20090705907	RM20090705792	RM20090706345	RM20090705865	RM20090705614	RM20090705794	RM20090705102	RM20090705555	RM20090705708	RM20090705971	RM20090705199	RM20090705713	RM20090704975	RM20090705729	RM20090705500	RM20090705435	RM20090705668	RM20090705085	RM20090705037	RM20090704636	RM20090704561	RM20090705190	RM20090706010	RM20090705095	RM20090704170	RM20090704936	RM20090704996
RM20090705842	RM20090705998	RM20090705885	RM20090705782	RM20090706344	RM20090705860	RM20090705606	RM20090705790	RM20090704951	RM20090705513	RM20090705699	RM20090705964	RM20090705156	RM20090705711	RM20090704946	RM20090705658	RM20090705482	RM20090705391	RM20090705616	RM20090705032	RM20090705031	RM20090704630	RM20090704515	RM20090705186	RM20090706003	RM20090705048	RM20090704142	RM20090704931	RM20090704956
RM20090705813	RM20090705996	RM20090705869	RM20090705722	RM20090706333	RM20090705855	RM20090705593	RM20090705764	RM20090704934	RM20090705509	RM20090705693	RM20090705928	RM20090705051	RM20090705635	RM20090704830	RM20090705588	RM20090705423	RM20090705346	RM20090705547	RM20090705021	RM20090705026	RM20090704578	RM20090704428	RM20090705049	RM20090706001	RM20090704995	RM20090704129	RM20090704862	RM20090704909
RM20090705791	RM20090705961	RM20090705820	RM20090705721	RM20090706331	RM20090705809	RM20090705591	RM20090705738	RM20090704927	RM20090705462	RM20090705686	RM20090705908	RM20090704997	RM20090705633	RM20090704798	RM20090705586	RM20090705374	RM20090705244	RM20090705525	RM20090704910	RM20090704942	RM20090704553	RM20090704408	RM20090704944	RM20090705879	RM20090704970	RM20090703976	RM20090704842	RM20090704789
RM20090705761	RM20090705922	RM20090705783	RM20090705696	RM20090706313	RM20090705789	RM20090705556	RM20090705734	RM20090704863	RM20090705361	RM20090705685	RM20090705893	RM20090704992	RM20090705626	RM20090704757	RM20090705516	RM20090705310	RM20090705202	RM20090705506	RM20090704904	RM20090704879	RM20090704541	RM20090704221	RM20090704784	RM20090705823	RM20090704913	RM20090703891	RM20090704819	RM20090704703
RM20090705702	RM20090705898	RM20090705744	RM20090705646	RM20090706303	RM20090705772	RM20090705522	RM20090705684	RM20090704832	RM20090705347	RM20090705659	RM20090705866	RM20090704959	RM20090705621	RM20090704736	RM20090705511	RM20090705295	RM20090705132	RM20090705454	RM20090704893	RM20090704861	RM20090704510	RM20090704215	RM20090704771	RM20090705811	RM20090704826	RM20090703812	RM20090704689	RM20090704437
RM20090705647	RM20090705874	RM20090705739	RM20090705572	RM20090706281	RM20090705755	RM20090705481	RM20090705594	RM20090704827	RM20090705317	RM20090705636	RM20090705833	RM20090704894	RM20090705486	RM20090704733	RM20090705490	RM20090705279	RM20090705120	RM20090705450	RM20090704786	RM20090704829	RM20090704488	RM20090704150	RM20090704760	RM20090705807	RM20090704735	RM20090703802	RM20090704562	RM20090704410
RM20090705642	RM20090705871	RM20090705703	RM20090705524	RM20090706277	RM20090705733	RM20090705452	RM20090705585	RM20090704797	RM20090705147	RM20090705624	RM20090705815	RM20090704809	RM20090705296	RM20090704701	RM20090705460	RM20090705275	RM20090705090	RM20090705438	RM20090704743	RM20090704780	RM20090704433	RM20090703941	RM20090704615	RM20090705779	RM20090704557	RM20090703784	RM20090704439	RM20090704389
RM20090705605	RM20090705868	RM20090705694	RM20090705514	RM20090706273	RM20090705723	RM20090705402	RM20090705542	RM20090704770	RM20090705127	RM20090705619	RM20090705814	RM20090704774	RM20090705277	RM20090704700	RM20090705400	RM20090705149	RM20090705071	RM20090705409	RM20090704708	RM20090704720	RM20090704362	RM20090703919	RM20090704564	RM20090705768	RM20090704466	RM20090703782	RM20090704353	RM20090704332
RM20090705600	RM20090705856	RM20090705687	RM20090705512	RM20090706271	RM20090705717	RM20090705392	RM20090705527	RM20090704751	RM20090705110	RM20090705607	RM20090705785	RM20090704483	RM20090705203	RM20090704619	RM20090705377	RM20090705104	RM20090704978	RM20090705302	RM20090704601	RM20090704683	RM20090704356	RM20090703888	RM20090704523	RM20090705748	RM20090704303	RM20090703769	RM20090704337	RM20090704316
RM20090705597	RM20090705830	RM20090705660	RM20090705489	RM20090706260	RM20090705709	RM20090705385	RM20090705468	RM20090704729	RM20090705060	RM20090705601	RM20090705737	RM20090704482	RM20090705145	RM20090704592	RM20090705284	RM20090704969	RM20090704922	RM20090705301	RM20090704594	RM20090704597	RM20090704308	RM20090703821	RM20090704492	RM20090705732	RM20090704245	RM20090703706	RM20090704276	RM20090704190
RM20090705550	RM20090705824	RM20090705655	RM20090705487	RM20090706246	RM20090705679	RM20090705369	RM20090705413	RM20090704669	RM20090705043	RM20090705559	RM20090705712	RM20090704459	RM20090705133	RM20090704582	RM20090705271	RM20090704950	RM20090704814	RM20090705235	RM20090704502	RM20090704583	RM20090704193	RM20090703780	RM20090704369	RM20090705726	RM20090704092	RM20090703671	RM20090704085	RM20090704157
RM20090705498	RM20090705796	RM20090705650	RM20090705364	RM20090706216	RM20090705610	RM20090705350	RM20090705283	RM20090704637	RM20090704991	RM20090705554	RM20090705705	RM20090704321	RM20090705118	RM20090704570	RM20090705251	RM20090704906	RM20090704723	RM20090705222	RM20090704467	RM20090704571	RM20090704174	RM20090703744	RM20090704278	RM20090705714	RM20090704066	RM20090703578	RM20090703982	RM20090704126
RM20090705495	RM20090705770	RM20090705637	RM20090705354	RM20090706175	RM20090705608	RM20090705341	RM20090705268	RM20090704599	RM20090704981	RM20090705502	RM20090705675	RM20090704281	RM20090705089	RM20090704567	RM20090705242	RM20090704885	RM20090704687	RM20090705201	RM20090704407	RM20090704532	RM20090704172	RM20090703720	RM20090704239	RM20090705698	RM20090704056	RM20090703508	RM20090703887	RM20090703986
RM20090705472	RM20090705762	RM20090705590	RM20090705352	RM20090706135	RM20090705596	RM20090705280	RM20090705263	RM20090704575	RM20090704821	RM20090705496	RM20090705617	RM20090704279	RM20090705080	RM20090704546	RM20090705213	RM20090704858	RM20090704659	RM20090705144	RM20090704138	RM20090704448	RM20090704118	RM20090703680	RM20090704188	RM20090705692	RM20090704022	RM20090703479	RM20090703835	RM20090703942
RM20090705436	RM20090705756	RM20090705587	RM20090705342	RM20090706118	RM20090705475	RM20090705254	RM20090705256	RM20090704539	RM20090704810	RM20090705432	RM20090705539	RM20090704254	RM20090705041	RM20090704447	RM20090705205	RM20090704850	RM20090704657	RM20090705103	RM20090703939	RM20090704425	RM20090704087	RM20090703514	RM20090704160	RM20090705656	RM20090703997	RM20090703435	RM20090703833	RM20090703928
RM20090705427	RM20090705706	RM20090705531	RM20090705289	RM20090706116	RM20090705401	RM20090705221	RM20090705241	RM20090704528	RM20090704802	RM20090705430	RM20090705508	RM20090704176	RM20090705040	RM20090704436	RM20090705196	RM20090704796	RM20090704566	RM20090705079	RM20090703937	RM20090704327	RM20090704071	RM20090703511	RM20090704146	RM20090705622	RM20090703956	RM20090703410	RM20090703794	RM20090703886
RM20090705426	RM20090705688	RM20090705499	RM20090705286	RM20090706114	RM20090705382	RM20090705152	RM20090705226	RM20090704275	RM20090704738	RM20090705420	RM20090705483	RM20090704084	RM20090704993	RM20090704326	RM20090705187	RM20090704758	RM20090704535	RM20090704948	RM20090703912	RM20090704318	RM20090703945	RM20090703509	RM20090704091	RM20090705580	RM20090703789	RM20090703347	RM20090703746	RM20090703822
RM20090705425	RM20090705625	RM20090705484	RM20090705252	RM20090706079	RM20090705368	RM20090705108	RM20090705181	RM20090704224	RM20090704686	RM20090705419	RM20090705465	RM20090704067	RM20090704791	RM20090704265	RM20090705173	RM20090704719	RM20090704531	RM20090704890	RM20090703843	RM20090704249	RM20090703798	RM20090703349	RM20090704013	RM20090705578	RM20090703729	RM20090703303	RM20090703738	RM20090703792
RM20090705424	RM20090705612	RM20090705474	RM20090705246	RM20090705994	RM20090705348	RM20090705092	RM20090705174	RM20090704134	RM20090704680	RM20090705414	RM20090705433	RM20090704058	RM20090704727	RM20090704250	RM20090705138	RM20090704684	RM20090704526	RM20090704841	RM20090703807	RM20090704214	RM20090703707	RM20090703300	RM20090703959	RM20090705535	RM20090703658	RM20090703302	RM20090703689	RM20090703779
RM20090705380	RM20090705599	RM20090705457	RM20090705178	RM20090705985	RM20090705318	RM20090704952	RM20090705076	RM20090704124	RM20090704666	RM20090705407	RM20090705405	RM20090704045	RM20090704724	RM20090704213	RM20090705119	RM20090704624	RM20090704520	RM20090704801	RM20090703639	RM20090704105	RM20090703540	RM20090703226	RM20090703875	RM20090705429	RM20090703610	RM20090703282	RM20090703675	RM20090703770
RM20090705321	RM20090705565	RM20090705437	RM20090705129	RM20090705968	RM20090705297	RM20090704919	RM20090705068	RM20090704119	RM20090704609	RM20090705387	RM20090705371	RM20090704035	RM20090704670	RM20090704199	RM20090705113	RM20090704622	RM20090704472	RM20090704787	RM20090703604	RM20090704098	RM20090703445	RM20090703197	RM20090703870	RM20090705372	RM20090703590	RM20090703132	RM20090703542	RM20090703731
RM20090705304	RM20090705562	RM20090705428	RM20090705107	RM20090705955	RM20090705288	RM20090704889	RM20090705055	RM20090704097	RM20090704577	RM20090705353	RM20090705365	RM20090703954	RM20090704667	RM20090704113	RM20090705053	RM20090704611	RM20090704444	RM20090704776	RM20090703603	RM20090703993	RM20090703443	RM20090703138	RM20090703867	RM20090705366	RM20090703561	RM20090703130	RM20090703535	RM20090703679
RM20090705303	RM20090705558	RM20090705399	RM20090705100	RM20090705943	RM20090705109	RM20090704880	RM20090705001	RM20090704057	RM20090704524	RM20090705343	RM20090705358	RM20090703915	RM20090704650	RM20090704112	RM20090704916	RM20090704610	RM20090704412	RM20090704756	RM20090703571	RM20090703979	RM20090703437	RM20090703042	RM20090703853	RM20090705287	RM20090703559	RM20090703002	RM20090703489	RM20090703647
RM20090705290	RM20090705548	RM20090705398	RM20090705065	RM20090705942	RM20090705105	RM20090704845	RM20090704983	RM20090704051	RM20090704513	RM20090705329	RM20090705335	RM20090703772	RM20090704612	RM20090704111	RM20090704911	RM20090704486	RM20090704209	RM20090704709	RM20090703537	RM20090703968	RM20090703409	RM20090703034	RM20090703817	RM20090705253	RM20090703477	RM20090702964	RM20090703464	RM20090703602
RM20090705269	RM20090705537	RM20090705384	RM20090705054	RM20090705938	RM20090705063	RM20090704828	RM20090704932	RM20090704008	RM20090704500	RM20090705314	RM20090705323	RM20090703697	RM20090704560	RM20090704017	RM20090704860	RM20090704431	RM20090704153	RM20090704628	RM20090703427	RM20090703921	RM20090703382	RM20090703008	RM20090703810	RM20090705238	RM20090703475	RM20090702885	RM20090703386	RM20090703525
RM20090705265	RM20090705521	RM20090705379	RM20090705044	RM20090705903	RM20090705004	RM20090704823	RM20090704840	RM20090703988	RM20090704496	RM20090705307	RM20090705319	RM20090703693	RM20090704507	RM20090703965	RM20090704764	RM20090704427	RM20090704123	RM20090704576	RM20090703414	RM20090703725	RM20090703350	RM20090702841	RM20090703806	RM20090705210	RM20090703403	RM20090702855	RM20090703360	RM20090703507
RM20090705262	RM20090705479	RM20090705375	RM20090704987	RM20090705900	RM20090704954	RM20090704766	RM20090704773	RM20090703980	RM20090704481	RM20090705299	RM20090705281	RM20090703685	RM20090704501	RM20090703881	RM20090704759	RM20090704413	RM20090704114	RM20090704549	RM20090703413	RM20090703628	RM20090703286	RM20090702606	RM20090703800	RM20090705143	RM20090703307	RM20090702681	RM20090703341	RM20090703346
RM20090705255	RM20090705459	RM20090705360	RM20090704973	RM20090705877	RM20090704915	RM20090704731	RM20090704765	RM20090703861	RM20090704480	RM20090705267	RM20090705258	RM20090703682	RM20090704495	RM20090703761	RM20090704740	RM20090704147	RM20090704107	RM20090704489	RM20090703353	RM20090703579	RM20090703278	RM20090702562	RM20090703727	RM20090705134	RM20090703233	RM20090702670	RM20090703324	RM20090703338
RM20090705247	RM20090705458	RM20090705330	RM20090704935	RM20090705812	RM20090704869	RM20090704722	RM20090704761	RM20090703848	RM20090704461	RM20090705227	RM20090705229	RM20090703654	RM20090704494	RM20090703700	RM20090704647	RM20090704145	RM20090704028	RM20090704429	RM20090703337	RM20090703517	RM20090703266	RM20090702504	RM20090703699	RM20090705128	RM20090703231	RM20090702563	RM20090703245	RM20090703316
RM20090705239	RM20090705418	RM20090705316	RM20090704917	RM20090705810	RM20090704844	RM20090704710	RM20090704755	RM20090703844	RM20090704449	RM20090705207	RM20090705151	RM20090703568	RM20090704452	RM20090703696	RM20090704633	RM20090704110	RM20090703935	RM20090704400	RM20090703325	RM20090703451	RM20090703259	RM20090702446	RM20090703586	RM20090705115	RM20090703221	RM20090702550	RM20090703229	RM20090703284
RM20090705142	RM20090705403	RM20090705300	RM20090704896	RM20090705804	RM20090704843	RM20090704653	RM20090704691	RM20090703831	RM20090704446	RM20090705192	RM20090705137	RM20090703548	RM20090704379	RM20090703670	RM20090704606	RM20090704076	RM20090703922	RM20090704392	RM20090703274	RM20090703426	RM20090703227	RM20090702369	RM20090703447	RM20090705028	RM20090703093	RM20090702496	RM20090703123	RM20090703271
RM20090705126	RM20090705390	RM20090705293	RM20090704886	RM20090705760	RM20090704806	RM20090704635	RM20090704682	RM20090703775	RM20090704246	RM20090705179	RM20090705121	RM20090703527	RM20090704343	RM20090703645	RM20090704543	RM20090704052	RM20090703916	RM20090704383	RM20090703239	RM20090703333	RM20090703067	RM20090702308	RM20090703365	RM20090705014	RM20090703084	RM20090702495	RM20090703106	RM20090703242
RM20090705123	RM20090705389	RM20090705259	RM20090704824	RM20090705743	RM20090704707	RM20090704625	RM20090704671	RM20090703766	RM20090704127	RM20090705175	RM20090705067	RM20090703524	RM20090704300	RM20090703638	RM20090704514	RM20090704026	RM20090703895	RM20090704323	RM20090703143	RM20090703322	RM20090703027	RM20090702300	RM20090703358	RM20090704962	RM20090703037	RM20090702330	RM20090703076	RM20090703228
RM20090705013	RM20090705370	RM20090705257	RM20090704813	RM20090705718	RM20090704688	RM20090704621	RM20090704652	RM20090703736	RM20090704106	RM20090705140	RM20090705064	RM20090703500	RM20090704286	RM20090703606	RM20090704469	RM20090703969	RM20090703862	RM20090704306	RM20090703016	RM20090703312	RM20090702955	RM20090702199	RM20090703339	RM20090704838	RM20090703001	RM20090702312	RM20090703029	RM20090703104
RM20090705012	RM20090705355	RM20090705220	RM20090704788	RM20090705676	RM20090704677	RM20090704581	RM20090704587	RM20090703717	RM20090704070	RM20090705125	RM20090705025	RM20090703476	RM20090704260	RM20090703576	RM20090704456	RM20090703892	RM20090703852	RM20090704258	RM20090702975	RM20090703301	RM20090702772	RM20090702131	RM20090703314	RM20090704777	RM20090702983	RM20090702214	RM20090702977	RM20090703028
RM20090704979	RM20090705340	RM20090705206	RM20090704762	RM20090705631	RM20090704673	RM20090704563	RM20090704537	RM20090703668	RM20090703977	RM20090705116	RM20090705007	RM20090703194	RM20090704203	RM20090703529	RM20090704421	RM20090703877	RM20090703677	RM20090704230	RM20090702966	RM20090703258	RM20090702666	RM20090702117	RM20090703310	RM20090704754	RM20090702935	RM20090702172	RM20090702940	RM20090703011
RM20090704976	RM20090705337	RM20090705177	RM20090704749	RM20090705629	RM20090704590	RM20090704487	RM20090704506	RM20090703598	RM20090703961	RM20090705070	RM20090705002	RM20090703095	RM20090704154	RM20090703505	RM20090704405	RM20090703869	RM20090703665	RM20090704178	RM20090702957	RM20090703222	RM20090702653	RM20090702076	RM20090703285	RM20090704750	RM20090702922	RM20090702116	RM20090702900	RM20090702910
RM20090704964	RM20090705328	RM20090705171	RM20090704711	RM20090705627	RM20090704522	RM20090704375	RM20090704475	RM20090703597	RM20090703882	RM20090705058	RM20090704994	RM20090703053	RM20090704115	RM20090703412	RM20090704386	RM20090703820	RM20090703649	RM20090704169	RM20090702930	RM20090703127	RM20090702648	RM20090701983	RM20090703269	RM20090704737	RM20090702773	RM20090702017	RM20090702715	RM20090702813
RM20090704955	RM20090705260	RM20090705101	RM20090704695	RM20090705595	RM20090704477	RM20090704368	RM20090704442	RM20090703587	RM20090703878	RM20090705003	RM20090704939	RM20090703045	RM20090704096	RM20090703359	RM20090704339	RM20090703751	RM20090703646	RM20090704165	RM20090702899	RM20090703003	RM20090702633	RM20090701943	RM20090703206	RM20090704728	RM20090702739	RM20090701927	RM20090702583	RM20090702804
RM20090704907	RM20090705250	RM20090705069	RM20090704676	RM20090705584	RM20090704468	RM20090704329	RM20090704435	RM20090703580	RM20090703855	RM20090704986	RM20090704938	RM20090703040	RM20090704086	RM20090703264	RM20090704331	RM20090703708	RM20090703609	RM20090704046	RM20090702801	RM20090702875	RM20090702597	RM20090701900	RM20090703205	RM20090704725	RM20090702720	RM20090701906	RM20090702580	RM20090702791
RM20090704857	RM20090705234	RM20090705066	RM20090704616	RM20090705563	RM20090704453	RM20090704324	RM20090704432	RM20090703560	RM20090703837	RM20090704966	RM20090704928	RM20090703019	RM20090704039	RM20090703248	RM20090704328	RM20090703662	RM20090703502	RM20090703953	RM20090702730	RM20090702852	RM20090702587	RM20090701884	RM20090703098	RM20090704617	RM20090702717	RM20090701902	RM20090702391	RM20090702745
RM20090704853	RM20090705217	RM20090705057	RM20090704608	RM20090705534	RM20090704404	RM20090704320	RM20090704418	RM20090703461	RM20090703824	RM20090704947	RM20090704908	RM20090703014	RM20090704030	RM20090703166	RM20090704282	RM20090703629	RM20090703473	RM20090703931	RM20090702665	RM20090702844	RM20090702573	RM20090701860	RM20090703035	RM20090704595	RM20090702716	RM20090701901	RM20090702352	RM20090702744
RM20090704852	RM20090705154	RM20090705035	RM20090704586	RM20090705533	RM20090704374	RM20090704310	RM20090704373	RM20090703460	RM20090703796	RM20090704883	RM20090704891	RM20090702999	RM20090704021	RM20090703074	RM20090704255	RM20090703592	RM20090703471	RM20090703925	RM20090702625	RM20090702708	RM20090702493	RM20090701746	RM20090703013	RM20090704591	RM20090702509	RM20090701890	RM20090702326	RM20090702738
RM20090704846	RM20090705139	RM20090705034	RM20090704558	RM20090705510	RM20090704359	RM20090704280	RM20090704364	RM20090703422	RM20090703764	RM20090704882	RM20090704873	RM20090702991	RM20090704009	RM20090703009	RM20090704234	RM20090703549	RM20090703431	RM20090703890	RM20090702571	RM20090702703	RM20090702464	RM20090701737	RM20090702962	RM20090704554	RM20090702412	RM20090701755	RM20090702224	RM20090702737
RM20090704833	RM20090705130	RM20090705024	RM20090704555	RM20090705507	RM20090704301	RM20090704244	RM20090704358	RM20090703404	RM20090703642	RM20090704870	RM20090704817	RM20090702987	RM20090703932	RM20090702938	RM20090704191	RM20090703480	RM20090703268	RM20090703840	RM20090702557	RM20090702686	RM20090702436	RM20090701718	RM20090702826	RM20090704552	RM20090702228	RM20090701697	RM20090702216	RM20090702721
RM20090704825	RM20090705124	RM20090705022	RM20090704542	RM20090705488	RM20090704293	RM20090704243	RM20090704297	RM20090703331	RM20090703640	RM20090704867	RM20090704769	RM20090702954	RM20090703832	RM20090702873	RM20090704133	RM20090703438	RM20090703220	RM20090703786	RM20090702545	RM20090702614	RM20090702434	RM20090701628	RM20090702784	RM20090704547	RM20090702073	RM20090701687	RM20090702158	RM20090702636
RM20090704822	RM20090705081	RM20090705015	RM20090704540	RM20090705469	RM20090704289	RM20090704233	RM20090704288	RM20090703330	RM20090703600	RM20090704856	RM20090704672	RM20090702912	RM20090703823	RM20090702840	RM20090704130	RM20090703401	RM20090703121	RM20090703758	RM20090702516	RM20090702579	RM20090702380	RM20090701515	RM20090702778	RM20090704518	RM20090701992	RM20090701678	RM20090702138	RM20090702594
RM20090704804	RM20090705074	RM20090704899	RM20090704525	RM20090705461	RM20090704272	RM20090704202	RM20090704253	RM20090703295	RM20090703588	RM20090704854	RM20090704640	RM20090702903	RM20090703811	RM20090702827	RM20090704122	RM20090703378	RM20090703085	RM20090703750	RM20090702502	RM20090702564	RM20090702367	RM20090701453	RM20090702769	RM20090704455	RM20090701952	RM20090701635	RM20090702078	RM20090702439
RM20090704803	RM20090705036	RM20090704884	RM20090704504	RM20090705456	RM20090704269	RM20090704198	RM20090704208	RM20090703196	RM20090703574	RM20090704851	RM20090704623	RM20090702812	RM20090703804	RM20090702796	RM20090704081	RM20090703354	RM20090703017	RM20090703730	RM20090702377	RM20090702468	RM20090702345	RM20090701407	RM20090702766	RM20090704440	RM20090701857	RM20090701612	RM20090702030	RM20090702437
RM20090704800	RM20090705017	RM20090704859	RM20090704493	RM20090705453	RM20090704268	RM20090704055	RM20090704180	RM20090703129	RM20090703557	RM20090704836	RM20090704565	RM20090702736	RM20090703754	RM20090702793	RM20090704080	RM20090703321	RM20090702965	RM20090703721	RM20090702251	RM20090702455	RM20090702296	RM20090701330	RM20090702706	RM20090704419	RM20090701763	RM20090701596	RM20090701972	RM20090702382
RM20090704799	RM20090705010	RM20090704781	RM20090704460	RM20090705441	RM20090704186	RM20090704029	RM20090704144	RM20090703071	RM20090703555	RM20090704807	RM20090704556	RM20090702723	RM20090703741	RM20090702780	RM20090704068	RM20090703265	RM20090702916	RM20090703703	RM20090702235	RM20090702445	RM20090702281	RM20090701246	RM20090702663	RM20090704403	RM20090701731	RM20090701574	RM20090701871	RM20090702366
RM20090704745	RM20090705000	RM20090704746	RM20090704454	RM20090705415	RM20090704163	RM20090703989	RM20090703962	RM20090703061	RM20090703506	RM20090704805	RM20090704534	RM20090702604	RM20090703711	RM20090702762	RM20090704041	RM20090703094	RM20090702915	RM20090703702	RM20090702157	RM20090702431	RM20090702106	RM20090700981	RM20090702651	RM20090704397	RM20090701431	RM20090701478	RM20090701852	RM20090702351
RM20090704715	RM20090704972	RM20090704741	RM20090704451	RM20090705412	RM20090704161	RM20090703985	RM20090703960	RM20090703059	RM20090703456	RM20090704779	RM20090704509	RM20090702547	RM20090703651	RM20090702618	RM20090703992	RM20090702994	RM20090702908	RM20090703695	RM20090702101	RM20090702420	RM20090702093	RM20090700867	RM20090702639	RM20090704366	RM20090701365	RM20090701471	RM20090701829	RM20090702283
RM20090704656	RM20090704940	RM20090704713	RM20090704443	RM20090705411	RM20090704159	RM20090703910	RM20090703957	RM20090703044	RM20090703455	RM20090704775	RM20090704464	RM20090702487	RM20090703599	RM20090702536	RM20090703971	RM20090702992	RM20090702905	RM20090703611	RM20090702019	RM20090702416	RM20090702070	RM20090700805	RM20090702619	RM20090704360	RM20090701355	RM20090701308	RM20090701688	RM20090702267
RM20090704632	RM20090704926	RM20090704705	RM20090704416	RM20090705396	RM20090704100	RM20090703898	RM20090703929	RM20090703043	RM20090703454	RM20090704726	RM20090704462	RM20090702480	RM20090703585	RM20090702499	RM20090703947	RM20090702913	RM20090702884	RM20090703593	RM20090701966	RM20090702376	RM20090702003	RM20090700804	RM20090702578	RM20090704354	RM20090701265	RM20090701134	RM20090701629	RM20090702266
RM20090704598	RM20090704921	RM20090704692	RM20090704390	RM20090705395	RM20090704089	RM20090703896	RM20090703904	RM20090703030	RM20090703449	RM20090704716	RM20090704434	RM20090702433	RM20090703536	RM20090702478	RM20090703923	RM20090702890	RM20090702839	RM20090703581	RM20090701875	RM20090702346	RM20090701909	RM20090700800	RM20090702558	RM20090704345	RM20090701218	RM20090701085	RM20090701525	RM20090702250
RM20090704484	RM20090704918	RM20090704681	RM20090704363	RM20090705393	RM20090704075	RM20090703866	RM20090703889	RM20090702960	RM20090703399	RM20090704697	RM20090704422	RM20090702401	RM20090703531	RM20090702460	RM20090703902	RM20090702854	RM20090702816	RM20090703563	RM20090701815	RM20090702342	RM20090701880	RM20090700745	RM20090702540	RM20090704322	RM20090701194	RM20090701051	RM20090701475	RM20090702203
RM20090704465	RM20090704895	RM20090704674	RM20090704351	RM20090705376	RM20090704074	RM20090703830	RM20090703790	RM20090702937	RM20090703280	RM20090704668	RM20090704411	RM20090702317	RM20090703497	RM20090702422	RM20090703865	RM20090702835	RM20090702788	RM20090703499	RM20090701803	RM20090702294	RM20090701819	RM20090700641	RM20090702488	RM20090704319	RM20090700746	RM20090701042	RM20090701332	RM20090702183
RM20090704430	RM20090704783	RM20090704655	RM20090704304	RM20090705349	RM20090704062	RM20090703805	RM20090703757	RM20090702790	RM20090703263	RM20090704658	RM20090704384	RM20090702310	RM20090703408	RM20090702168	RM20090703864	RM20090702806	RM20090702734	RM20090703486	RM20090701797	RM20090702207	RM20090701813	RM20090700447	RM20090702461	RM20090704312	RM20090700711	RM20090700993	RM20090701202	RM20090702179
RM20090704401	RM20090704752	RM20090704651	RM20090704299	RM20090705345	RM20090704042	RM20090703799	RM20090703742	RM20090702771	RM20090703217	RM20090704646	RM20090704382	RM20090702293	RM20090703394	RM20090702162	RM20090703814	RM20090702794	RM20090702621	RM20090703474	RM20090701767	RM20090702202	RM20090701754	RM20090700324	RM20090702427	RM20090704309	RM20090700595	RM20090700925	RM20090701187	RM20090702173
RM20090704394	RM20090704734	RM20090704648	RM20090704285	RM20090705326	RM20090703987	RM20090703774	RM20090703714	RM20090702765	RM20090703171	RM20090704626	RM20090704357	RM20090702269	RM20090703388	RM20090702112	RM20090703791	RM20090702763	RM20090702602	RM20090703429	RM20090701685	RM20090702198	RM20090701672	RM20090700312	RM20090702404	RM20090704307	RM20090700543	RM20090700921	RM20090701145	RM20090702098
RM20090704338	RM20090704660	RM20090704643	RM20090704264	RM20090705272	RM20090703951	RM20090703771	RM20090703710	RM20090702758	RM20090703154	RM20090704604	RM20090704352	RM20090702217	RM20090703313	RM20090702007	RM20090703781	RM20090702724	RM20090702554	RM20090703370	RM20090701606	RM20090702195	RM20090701607	RM20090700241	RM20090702280	RM20090704291	RM20090700502	RM20090700866	RM20090701012	RM20090702011
RM20090704302	RM20090704596	RM20090704634	RM20090704251	RM20090705236	RM20090703930	RM20090703755	RM20090703698	RM20090702755	RM20090703116	RM20090704544	RM20090704350	RM20090702189	RM20090703306	RM20090701918	RM20090703777	RM20090702714	RM20090702448	RM20090703351	RM20090701509	RM20090702151	RM20090701588	RM20090700216	RM20090702229	RM20090704267	RM20090700456	RM20090700814	RM20090700991	RM20090701814
RM20090704298	RM20090704593	RM20090704579	RM20090704238	RM20090705219	RM20090703897	RM20090703753	RM20090703657	RM20090702698	RM20090703096	RM20090704538	RM20090704333	RM20090702170	RM20090703241	RM20090701856	RM20090703739	RM20090702692	RM20090702430	RM20090703214	RM20090701468	RM20090702080	RM20090701571	OMM5305	RM20090702218	RM20090704266	RM20090700454	RM20090700664	RM20090700933	RM20090701761
RM20090704294	RM20090704588	RM20090704550	RM20090704184	RM20090705193	RM20090703874	RM20090703672	RM20090703637	RM20090702682	RM20090703077	RM20090704516	RM20090704330	RM20090702125	RM20090703082	RM20090701805	RM20090703732	RM20090702678	RM20090702260	RM20090703202	RM20090701376	RM20090702047	RM20090701510	OMM1584	RM20090702167	RM20090704261	RM20090700416	RM20090700629	RM20090700915	RM20090701734
RM20090704287	RM20090704568	RM20090704530	RM20090704183	RM20090705163	RM20090703818	RM20090703635	RM20090703547	RM20090702675	RM20090703075	RM20090704497	RM20090704315	RM20090701974	RM20090703070	RM20090701795	RM20090703607	RM20090702672	RM20090702230	RM20090703198	RM20090701328	RM20090701969	RM20090701322	OMM1238	RM20090702128	RM20090704242	RM20090700381	RM20090700428	RM20090700856	RM20090701673
RM20090704259	RM20090704527	RM20090704498	RM20090704094	RM20090705146	RM20090703813	RM20090703614	RM20090703515	RM20090702641	RM20090703065	RM20090704457	RM20090704241	RM20090701920	RM20090703063	RM20090701788	RM20090703564	RM20090702664	RM20090702211	RM20090703162	RM20090701321	RM20090701898	RM20090701307		RM20090702082	RM20090704229	RM20090700343	RM20090700396	RM20090700757	RM20090701530
RM20090704257	RM20090704521	RM20090704349	RM20090704063	RM20090705112	RM20090703734	RM20090703594	RM20090703392	RM20090702600	RM20090703041	RM20090704420	RM20090704240	RM20090701919	RM20090703026	RM20090701762	RM20090703545	RM20090702605	RM20090702210	RM20090703150	RM20090701287	RM20090701825	RM20090701259		RM20090702081	RM20090704227	RM20090700331	RM20090700391	RM20090700755	RM20090701482
RM20090704222	RM20090704511	RM20090704346	RM20090704053	RM20090705091	RM20090703716	RM20090703570	RM20090703383	RM20090702471	RM20090702934	RM20090704388	RM20090704194	RM20090701865	RM20090703004	RM20090701745	RM20090703530	RM20090702584	RM20090702150	RM20090703139	RM20090701258	RM20090701817	RM20090701255		RM20090702075	RM20090704196	RM20090700301	RM20090700376	RM20090700708	RM20090701388
RM20090704211	RM20090704473	RM20090704340	RM20090704011	RM20090705078	RM20090703712	RM20090703553	RM20090703377	RM20090702278	RM20090702904	RM20090704381	RM20090704187	RM20090701789	RM20090702924	RM20090701707	RM20090703516	RM20090702566	RM20090702123	RM20090703109	RM20090701196	RM20090701735	RM20090701197		RM20090702053	RM20090704151	RM20090700044	RM20090700317	RM20090700644	RM20090701377
RM20090704206	RM20090704395	RM20090704247	RM20090704001	RM20090705061	RM20090703686	RM20090703510	RM20090703355	RM20090702236	RM20090702729	RM20090704365	RM20090704101	RM20090701738	RM20090702897	RM20090701681	RM20090703491	RM20090702528	RM20090702052	RM20090703108	RM20090701130	RM20090701729	RM20090701097		RM20090701993	RM20090704082	OMY1189	RM20090700265	RM20090700528	RM20090701358
RM20090704201	RM20090704314	RM20090704232	RM20090704000	RM20090705052	RM20090703683	RM20090703396	RM20090703293	RM20090702154	RM20090702728	RM20090704361	RM20090704043	RM20090701717	RM20090702882	RM20090701614	RM20090703463	RM20090702513	RM20090702025	RM20090703101	RM20090701129	RM20090701700	RM20090700983		RM20090701941	RM20090704079	OMY1001UW	RM20090700200	RM20090700476	RM20090701356
RM20090704162	RM20090704277	RM20090704226	RM20090703963	RM20090705042	RM20090703617	RM20090703364	RM20090703291	RM20090702134	RM20090702546	RM20090704355	RM20090704020	RM20090701711	RM20090702817	RM20090701585	RM20090703421	RM20090702500	RM20090701939	RM20090703032	RM20090701128	RM20090701600	RM20090700953		RM20090701914	RM20090704078	OMM1539B	RM20090700192	RM20090700475	RM20090701339
RM20090704155	RM20090704248	RM20090704175	RM20090703950	RM20090705029	RM20090703487	RM20090703328	RM20090703288	RM20090702079	RM20090702522	RM20090704313	RM20090703999	RM20090701623	RM20090702814	RM20090701550	RM20090703415	RM20090702394	RM20090701925	RM20090702998	RM20090701119	RM20090701452	RM20090700937		RM20090701877	RM20090704034	OMM1512	RM20090700181	RM20090700453	RM20090701257
RM20090704120	RM20090704216	RM20090704132	RM20090703871	RM20090705016	RM20090703446	RM20090703327	RM20090703270	RM20090702049	RM20090702508	RM20090704305	RM20090703996	RM20090701616	RM20090702787	RM20090701539	RM20090703391	RM20090702360	RM20090701878	RM20090702997	RM20090701065	RM20090701380	RM20090700860		RM20090701859	RM20090704027	OMM1159	RM20090700150	RM20090700441	RM20090701248
RM20090704109	RM20090704212	RM20090704083	RM20090703857	RM20090704990	RM20090703425	RM20090703317	RM20090703247	RM20090701981	RM20090702450	RM20090704292	RM20090703984	RM20090701601	RM20090702749	RM20090701527	RM20090703390	RM20090702328	RM20090701863	RM20090702963	RM20090701061	RM20090701182	RM20090700835		RM20090701802	RM20090704018		RM20090700012	RM20090700370	RM20090701210
RM20090704093	RM20090704210	RM20090704064	RM20090703836	RM20090704989	RM20090703393	RM20090703275	RM20090703090	RM20090701924	RM20090702449	RM20090704219	RM20090703981	RM20090701555	RM20090702731	RM20090701499	RM20090703389	RM20090702314	RM20090701796	RM20090702959	RM20090701059	RM20090701167	RM20090700688		RM20090701709	RM20090704014		OMY7IIDIASB	RM20090700314	RM20090701121
RM20090704047	RM20090704204	RM20090704050	RM20090703795	RM20090704967	RM20090703357	RM20090703191	RM20090703068	RM20090701912	RM20090702417	RM20090704207	RM20090703967	RM20090701427	RM20090702707	RM20090701498	RM20090703348	RM20090702290	RM20090701784	RM20090702907	RM20090701048	RM20090701107	RM20090700635		RM20090701701	RM20090704010		OMY13DIAS	RM20090700251	RM20090701083
RM20090704044	RM20090704166	RM20090703972	RM20090703785	RM20090704945	RM20090703315	RM20090703168	RM20090703051	RM20090701874	RM20090702410	RM20090704189	RM20090703938	RM20090701156	RM20090702652	RM20090701445	RM20090703334	RM20090702252	RM20090701771	RM20090702832	RM20090701011	RM20090701037	RM20090700591		RM20090701675	RM20090704002		OMM5309	RM20090700116	RM20090700948
RM20090704015	RM20090704137	RM20090703924	RM20090703773	RM20090704933	RM20090703309	RM20090703158	RM20090703049	RM20090701868	RM20090702402	RM20090704182	RM20090703926	RM20090701135	RM20090702640	RM20090701395	RM20090703308	RM20090702200	RM20090701752	RM20090702811	RM20090700955	RM20090700949	RM20090700550		RM20090701655	RM20090703998		OMM5261	RM20090700112	RM20090700923
RM20090704012	RM20090704121	RM20090703914	RM20090703748	RM20090704924	RM20090703256	RM20090703152	RM20090703031	RM20090701862	RM20090702362	RM20090704179	RM20090703913	RM20090701100	RM20090702570	RM20090701360	RM20090703298	RM20090702178	RM20090701708	RM20090702798	RM20090700941	RM20090700931	RM20090700544		RM20090701644	RM20090703995		OMM1315	RM20090700059	RM20090700834
RM20090703966	RM20090704099	RM20090703905	RM20090703737	RM20090704912	RM20090703200	RM20090703111	RM20090702988	RM20090701838	RM20090702339	RM20090704173	RM20090703854	RM20090701039	RM20090702555	RM20090701334	RM20090703294	RM20090702175	RM20090701693	RM20090702797	RM20090700938	RM20090700869	RM20090700500		RM20090701599	RM20090703978		OMM1310	RM20090700015	RM20090700811
RM20090703934	RM20090704031	RM20090703834	RM20090703728	RM20090704872	RM20090703181	RM20090703079	RM20090702969	RM20090701798	RM20090702261	RM20090704168	RM20090703846	RM20090701030	RM20090702521	RM20090701268	RM20090703261	RM20090702163	RM20090701573	RM20090702756	RM20090700908	RM20090700791	RM20090700492		RM20090701593	RM20090703975		OMM1209	OMYRGT51TUF	RM20090700795
RM20090703917	RM20090703991	RM20090703819	RM20090703687	RM20090704855	RM20090703155	RM20090703069	RM20090702968	RM20090701726	RM20090702257	RM20090704149	RM20090703842	RM20090701002	RM20090702512	RM20090701222	RM20090703232	RM20090702127	RM20090701544	RM20090702634	RM20090700890	RM20090700743	RM20090700463		RM20090701496	RM20090703943		OMM1084	OMYRGT46TUF	RM20090700775
RM20090703903	RM20090703920	RM20090703787	RM20090703669	RM20090704839	RM20090703147	RM20090703060	RM20090702958	RM20090701699	RM20090702246	RM20090704125	RM20090703815	RM20090700952	RM20090702475	RM20090701131	RM20090703207	RM20090702114	RM20090701503	RM20090702595	RM20090700864	RM20090700685	RM20090700455		RM20090701477	RM20090703909		BX313739	OMY1013UW	RM20090700747
RM20090703872	RM20090703839	RM20090703765	RM20090703631	RM20090704815	RM20090703133	RM20090703022	RM20090702946	RM20090701671	RM20090702225	RM20090704077	RM20090703803	RM20090700803	RM20090702470	RM20090701103	RM20090703172	RM20090702105	RM20090701495	RM20090702537	RM20090700842	RM20090700661	RM20090700438		RM20090701455	RM20090703899			OMM5157	RM20090700712
RM20090703859	RM20090703816	RM20090703759	RM20090703630	RM20090704793	RM20090703119	RM20090702874	RM20090702944	RM20090701636	RM20090702186	RM20090704065	RM20090703797	RM20090700780	RM20090702353	RM20090701010	RM20090703169	RM20090702103	RM20090701487	RM20090702533	RM20090700754	RM20090700577	RM20090700410		RM20090701393	RM20090703884			OMM3022	RM20090700710
RM20090703849	RM20090703793	RM20090703656	RM20090703626	RM20090704767	RM20090703117	RM20090702872	RM20090702906	RM20090701595	RM20090702181	RM20090704061	RM20090703783	RM20090700704	RM20090702341	RM20090701005	RM20090703160	RM20090702035	RM20090701467	RM20090702466	RM20090700744	RM20090700446	RM20090700348		RM20090701389	RM20090703876			OMM1327	RM20090700657
RM20090703743	RM20090703762	RM20090703618	RM20090703601	RM20090704747	RM20090703102	RM20090702856	RM20090702893	RM20090701563	RM20090702156	RM20090704060	RM20090703763	RM20090700690	RM20090702336	RM20090700971	RM20090703140	RM20090702031	RM20090701460	RM20090702319	RM20090700668	RM20090700426	RM20090700292		RM20090701357	RM20090703856			CR373404	RM20090700609
RM20090703643	RM20090703735	RM20090703589	RM20090703567	RM20090704732	RM20090703072	RM20090702818	RM20090702892	RM20090701547	RM20090702143	RM20090704059	RM20090703760	RM20090700602	RM20090702322	RM20090700920	RM20090703125	RM20090701999	RM20090701425	RM20090702316	RM20090700616	RM20090700219	RM20090700101		RM20090701310	RM20090703845			BX870052B	RM20090700490
RM20090703633	RM20090703690	RM20090703483	RM20090703541	RM20090704730	RM20090702974	RM20090702810	RM20090702836	RM20090701501	RM20090702120	RM20090704003	RM20090703756	RM20090700551	RM20090702285	RM20090700797	RM20090703112	RM20090701977	RM20090701342	RM20090702277	RM20090700367	RM20090700195	OMM1625		RM20090701309	RM20090703808				RM20090700474
RM20090703619	RM20090703664	RM20090703444	RM20090703539	RM20090704665	RM20090702970	RM20090702792	RM20090702776	RM20090701472	RM20090702107	RM20090703983	RM20090703719	RM20090700537	RM20090702219	RM20090700761	RM20090702979	RM20090701936	RM20090701261	RM20090702270	RM20090700248	RM20090700076	OMM1457		RM20090701278	RM20090703776				RM20090700350
RM20090703612	RM20090703641	RM20090703428	RM20090703534	RM20090704664	RM20090702949	RM20090702783	RM20090702768	RM20090701451	RM20090702064	RM20090703952	RM20090703705	RM20090700435	RM20090702196	RM20090700665	RM20090702976	RM20090701931	RM20090701253	RM20090702201	RM20090700234	RM20090700037	OMM1365		RM20090701272	RM20090703768				RM20090700326
RM20090703566	RM20090703596	RM20090703417	RM20090703468	RM20090704663	RM20090702860	RM20090702709	RM20090702713	RM20090701428	RM20090702057	RM20090703933	RM20090703684	RM20090700356	RM20090702193	RM20090700658	RM20090702880	RM20090701913	RM20090701235	RM20090702142	RM20090700191	RM20090700034	OMM1316		RM20090701165	RM20090703709				RM20090700322
RM20090703532	RM20090703595	RM20090703367	RM20090703452	RM20090704661	RM20090702833	RM20090702688	RM20090702668	RM20090701402	RM20090702037	RM20090703907	RM20090703676	RM20090700309	RM20090702169	RM20090700639	RM20090702863	RM20090701818	RM20090701169	RM20090702126	RM20090700121	RM20090700021	OMM1003		RM20090701157	RM20090703550				RM20090700275
RM20090703520	RM20090703533	RM20090703332	RM20090703416	RM20090704645	RM20090702825	RM20090702658	RM20090702569	RM20090701391	RM20090702026	RM20090703873	RM20090703652	RM20090700260	RM20090702109	RM20090700613	RM20090702845	RM20090701800	RM20090701160	RM20090702122	OMYRGT6TUFB	RM20090700017	CA361411		RM20090701137	RM20090703466				RM20090700160
RM20090703484	RM20090703521	RM20090703260	RM20090703406	RM20090704642	RM20090702695	RM20090702643	RM20090702560	RM20090701383	RM20090702001	RM20090703851	RM20090703582	RM20090700118	RM20090702099	RM20090700563	RM20090702815	RM20090701794	RM20090701133	RM20090702033	OMM5044	RM20090700005	BX913059		RM20090701096	RM20090703465				RM20090700030
RM20090703478	RM20090703513	RM20090703219	RM20090703381	RM20090704618	RM20090702694	RM20090702642	RM20090702517	RM20090701359	RM20090701998	RM20090703829	RM20090703577	RM20090700069	RM20090702009	RM20090700516	RM20090702757	RM20090701791	RM20090701076	RM20090701965	OMM1775	OMM5100			RM20090701022	RM20090703442				RM20090700007
RM20090703395	RM20090703439	RM20090703089	RM20090703376	RM20090704607	RM20090702549	RM20090702620	RM20090702507	RM20090701349	RM20090701961	RM20090703801	RM20090703562	OMY1UOG	RM20090701995	RM20090700505	RM20090702690	RM20090701667	RM20090700951	RM20090701947	OMM1371	OMM1764B			RM20090700977	RM20090703440				OMM1772
RM20090703356	RM20090703436	RM20090703021	RM20090703362	RM20090704603	RM20090702529	RM20090702616	RM20090702505	RM20090701311	RM20090701926	RM20090703749	RM20090703558	OMY1212UW	RM20090701987	RM20090700486	RM20090702661	RM20090701621	RM20090700900	RM20090701917	OMM1360	OMM1729			RM20090700716	RM20090703402				OMM1715
RM20090703319	RM20090703397	RM20090702993	RM20090703352	RM20090704602	RM20090702489	RM20090702490	RM20090702465	RM20090701293	RM20090701908	RM20090703745	RM20090703551	OMM5154	RM20090701935	RM20090700466	RM20090702628	RM20090701572	RM20090700765	RM20090701842	OMM1139	OMM1578B			RM20090700691	RM20090703400				OMM1665
RM20090703281	RM20090703375	RM20090702967	RM20090703249	RM20090704551	RM20090702454	RM20090702467	RM20090702388	RM20090701206	RM20090701905	RM20090703653	RM20090703518	OMM5074C	RM20090701934	RM20090700430	RM20090702535	RM20090701560	RM20090700564	RM20090701811	OMM1135	OMM1566			RM20090700678	RM20090703366				OMM1405
RM20090703253	RM20090703368	RM20090702956	RM20090703223	RM20090704517	RM20090702428	RM20090702392	RM20090702340	RM20090701189	RM20090701816	RM20090703632	RM20090703485	OMM5074B	RM20090701896	RM20090700254	RM20090702491	RM20090701549	RM20090700559	RM20090701807	OMM1076	OMM1444B			RM20090700556	RM20090703343				OMM1118
RM20090703250	RM20090703311	RM20090702953	RM20090703180	RM20090704505	RM20090702385	RM20090702386	RM20090702331	RM20090701184	RM20090701812	RM20090703627	RM20090703448	OMM1670	RM20090701804	RM20090700246	RM20090702453	RM20090701535	RM20090700464	RM20090701780		OMM1261			RM20090700352	RM20090703230				OMM1026
RM20090703208	RM20090703277	RM20090702888	RM20090703164	RM20090704499	RM20090702371	RM20090702327	RM20090702325	RM20090701152	RM20090701801	RM20090703625	RM20090703430	OMM1369	RM20090701792	RM20090700208	RM20090702438	RM20090701526	RM20090700414	RM20090701742		OMM1256			RM20090700225	RM20090703210				BX076085
RM20090703203	RM20090703237	RM20090702869	RM20090703148	RM20090704490	RM20090702370	RM20090702289	RM20090702318	RM20090701143	RM20090701772	RM20090703621	RM20090703405	OMM1361B	RM20090701777	RM20090700088	RM20090702393	RM20090701474	RM20090700398	RM20090701720		OMM1196			RM20090700223	RM20090703209
RM20090703182	RM20090703236	RM20090702862	RM20090703135	RM20090704478	RM20090702359	RM20090702135	RM20090702205	RM20090701093	RM20090701690	RM20090703565	RM20090703398	OMM1330B	RM20090701739	OMYRGT17TUF	RM20090702379	RM20090701448	RM20090700378	RM20090701719		OMM1036			RM20090700205	RM20090703173
RM20090703176	RM20090703178	RM20090702754	RM20090703092	RM20090704474	RM20090702299	RM20090702132	RM20090702149	RM20090701080	RM20090701584	RM20090703543	RM20090703344		RM20090701689	OMY7INRA	RM20090702375	RM20090701443	RM20090700344	RM20090701710		BX887563			RM20090700179	RM20090703157
RM20090703170	RM20090703165	RM20090702753	RM20090703083	RM20090704463	RM20090702297	RM20090702110	RM20090702071	RM20090701020	RM20090701583	RM20090703523	RM20090703326		RM20090701469	OMM5099A	RM20090702323	RM20090701424	RM20090700311	RM20090701704					RM20090700082	RM20090703156
RM20090703114	RM20090703163	RM20090702722	RM20090703078	RM20090704415	RM20090702268	RM20090702065	RM20090702002	RM20090700954	RM20090701551	RM20090703493	RM20090703320		RM20090701457	OMM1784	RM20090702305	RM20090701386	RM20090700258	RM20090701669					OMYFGT24TUF	RM20090703153
RM20090703107	RM20090703161	RM20090702693	RM20090703054	RM20090704414	RM20090702191	RM20090702058	RM20090701958	RM20090700939	RM20090701520	RM20090703490	RM20090703283		RM20090701419	OMM1764A	RM20090702279	RM20090701367	RM20090700178	RM20090701665					OMY7IIDIASA	RM20090703151
RM20090703105	RM20090703146	RM20090702671	RM20090703046	RM20090704398	RM20090702166	RM20090702051	RM20090701949	RM20090700894	RM20090701502	RM20090703434	RM20090703262		RM20090701343	OMM1669	RM20090702259	RM20090701315	RM20090700169	RM20090701618					OMM5217	RM20090703126
RM20090703100	RM20090703144	RM20090702660	RM20090703038	RM20090704396	RM20090702147	RM20090702041	RM20090701911	RM20090700857	RM20090701483	RM20090703407	RM20090703243		RM20090701245	OMM1578A	RM20090702255	RM20090701294	RM20090700164	RM20090701617					OMM1563	RM20090703088
RM20090703086	RM20090703122	RM20090702638	RM20090703000	RM20090704393	RM20090702083	RM20090701978	RM20090701822	RM20090700785	RM20090701422	RM20090703385	RM20090703238		RM20090701241	OMM1444A	RM20090702221	RM20090701249	RM20090700084	RM20090701558					OMM1436	RM20090703047
RM20090703058	RM20090703113	RM20090702617	RM20090702972	RM20090704387	RM20090702067	RM20090701975	RM20090701760	RM20090700769	RM20090701409	RM20090703363	RM20090703215		RM20090701220	OMM1220	RM20090702197	RM20090701239	RM20090700063	RM20090701522					OMM1288	RM20090703024
RM20090702936	RM20090703015	RM20090702611	RM20090702951	RM20090704385	RM20090702066	RM20090701921	RM20090701732	RM20090700767	RM20090701354	RM20090703361	RM20090703201		RM20090701150		RM20090702192	RM20090701228	RM20090700061	RM20090701506					OMM1093	RM20090702927
RM20090702911	RM20090703006	RM20090702599	RM20090702942	RM20090704380	RM20090702056	RM20090701903	RM20090701728	RM20090700735	RM20090701280	RM20090703318	RM20090703193		RM20090701136		RM20090702171	RM20090701201	RM20090700038	RM20090701463						RM20090702853
RM20090702909	RM20090702990	RM20090702588	RM20090702932	RM20090704378	RM20090702016	RM20090701887	RM20090701679	RM20090700733	RM20090701274	RM20090703304	RM20090703175		RM20090701120		RM20090702164	RM20090701193	OMM5297	RM20090701454						RM20090702834
RM20090702898	RM20090702961	RM20090702568	RM20090702928	RM20090704372	RM20090702013	RM20090701885	RM20090701664	RM20090700696	RM20090701233	RM20090703296	RM20090703159		RM20090701114		RM20090702146	RM20090701159	OMM1746	RM20090701447						RM20090702824
RM20090702886	RM20090702945	RM20090702548	RM20090702896	RM20090704344	RM20090702004	RM20090701775	RM20090701641	RM20090700622	RM20090701208	RM20090703289	RM20090703142		RM20090701078		RM20090702144	RM20090701105	OMM1606	RM20090701435						RM20090702821
RM20090702805	RM20090702939	RM20090702542	RM20090702878	RM20090704342	RM20090701973	RM20090701765	RM20090701554	RM20090700612	RM20090701188	RM20090703234	RM20090703073		RM20090701043		RM20090702108	RM20090701101	OMM1352	RM20090701406						RM20090702775
RM20090702743	RM20090702929	RM20090702526	RM20090702848	RM20090704334	RM20090701956	RM20090701750	RM20090701545	RM20090700575	RM20090701170	RM20090703225	RM20090703057		RM20090701003		RM20090702023	RM20090701099	OMM1303	RM20090701401						RM20090702761
RM20090702741	RM20090702918	RM20090702519	RM20090702846	RM20090704284	RM20090701953	RM20090701698	RM20090701505	RM20090700573	RM20090701168	RM20090703204	RM20090703050		RM20090701001		RM20090701923	RM20090701053		RM20090701375						RM20090702759
RM20090702705	RM20090702902	RM20090702514	RM20090702823	RM20090704283	RM20090701948	RM20090701695	RM20090701421	RM20090700570	RM20090700989	RM20090703174	RM20090703033		RM20090700965		RM20090701851	RM20090701035		RM20090701374						RM20090702746
RM20090702685	RM20090702867	RM20090702511	RM20090702767	RM20090704271	RM20090701904	RM20090701668	RM20090701398	RM20090700560	RM20090700988	RM20090703167	RM20090703018		RM20090700960		RM20090701848	RM20090701025		RM20090701350						RM20090702742
RM20090702659	RM20090702819	RM20090702498	RM20090702712	RM20090704235	RM20090701867	RM20090701651	RM20090701392	RM20090700542	RM20090700873	RM20090703136	RM20090702881		RM20090700741		RM20090701783	RM20090700926		RM20090701316						RM20090702740
RM20090702609	RM20090702774	RM20090702497	RM20090702673	RM20090704223	RM20090701846	RM20090701646	RM20090701387	RM20090700526	RM20090700822	RM20090703087	RM20090702831		RM20090700718		RM20090701727	RM20090700903		RM20090701281						RM20090702711
RM20090702607	RM20090702719	RM20090702413	RM20090702635	RM20090704185	RM20090701831	RM20090701645	RM20090701351	RM20090700521	RM20090700799	RM20090703064	RM20090702828		RM20090700701		RM20090701670	RM20090700901		RM20090701263						RM20090702699
RM20090702581	RM20090702669	RM20090702403	RM20090702630	RM20090704171	RM20090701806	RM20090701631	RM20090701338	RM20090700385	RM20090700784	RM20090703062	RM20090702789		RM20090700576		RM20090701662	RM20090700880		RM20090701219						RM20090702689
RM20090702544	RM20090702647	RM20090702378	RM20090702572	RM20090704167	RM20090701781	RM20090701568	RM20090701333	RM20090700339	RM20090700773	RM20090702914	RM20090702785		RM20090700546		RM20090701611	RM20090700843		RM20090701175						RM20090702646
RM20090702527	RM20090702632	RM20090702358	RM20090702524	RM20090704156	RM20090701663	RM20090701552	RM20090701279	RM20090700335	RM20090700730	RM20090702891	RM20090702747		RM20090700488		RM20090701605	RM20090700841		RM20090701163						RM20090702596
RM20090702457	RM20090702626	RM20090702302	RM20090702482	RM20090704152	RM20090701661	RM20090701512	RM20090701205	RM20090700247	RM20090700705	RM20090702876	RM20090702726		RM20090700420		RM20090701594	RM20090700778		RM20090701147						RM20090702551
RM20090702418	RM20090702593	RM20090702301	RM20090702479	RM20090704148	RM20090701652	RM20090701504	RM20090701199	RM20090700206	RM20090700694	RM20090702858	RM20090702702		RM20090700411		RM20090701556	RM20090700714		RM20090701117						RM20090702494
RM20090702387	RM20090702586	RM20090702295	RM20090702441	RM20090704136	RM20090701634	RM20090701462	RM20090701162	RM20090700193	RM20090700615	RM20090702850	RM20090702655		RM20090700397		RM20090701458	RM20090700695		RM20090701109						RM20090702483
RM20090702361	RM20090702574	RM20090702271	RM20090702426	RM20090704104	RM20090701608	RM20090701449	RM20090701151	RM20090700162	RM20090700553	RM20090702799	RM20090702649		RM20090700297		RM20090701444	RM20090700631		RM20090701090						RM20090702411
RM20090702344	RM20090702472	RM20090702249	RM20090702425	RM20090704103	RM20090701575	RM20090701438	RM20090701126	RM20090700123	RM20090700421	RM20090702786	RM20090702627		RM20090700270		RM20090701418	RM20090700623		RM20090701082						RM20090702390
RM20090702206	RM20090702469	RM20090702244	RM20090702424	RM20090704073	RM20090701565	RM20090701408	RM20090701113	RM20090700103	RM20090700401	RM20090702732	RM20090702610		RM20090700199		RM20090701329	RM20090700621		RM20090701031						RM20090702373
RM20090702188	RM20090702443	RM20090702233	RM20090702398	RM20090704048	RM20090701548	RM20090701348	RM20090701007	RM20090700087	RM20090700388	RM20090702727	RM20090702592		RM20090700185		RM20090701303	RM20090700549		RM20090700875						RM20090702372
RM20090702174	RM20090702407	RM20090702222	RM20090702395	RM20090704040	RM20090701532	RM20090701283	RM20090700973	RM20090700074	RM20090700318	RM20090702700	RM20090702575		RM20090700137		RM20090701291	RM20090700539		RM20090700862						RM20090702348
RM20090702160	RM20090702368	RM20090702204	RM20090702383	RM20090704036	RM20090701494	RM20090701273	RM20090700970	RM20090700057	RM20090700306	RM20090702697	RM20090702538		RM20090700124		RM20090701285	RM20090700532		RM20090700823						RM20090702243
RM20090702130	RM20090702363	RM20090702182	RM20090702356	RM20090704033	RM20090701486	RM20090701238	RM20090700942	RM20090700041	RM20090700303	RM20090702680	RM20090702531		RM20090700098		RM20090701227	RM20090700499		RM20090700793						RM20090702234
RM20090702090	RM20090702354	RM20090702091	RM20090702347	RM20090704005	RM20090701465	RM20090701195	RM20090700906	OMYFGT2TUF	RM20090700233	RM20090702677	RM20090702501		RM20090700094		RM20090701185	RM20090700452		RM20090700748						RM20090702232
RM20090702088	RM20090702349	RM20090702048	RM20090702324	RM20090703990	RM20090701456	RM20090701183	RM20090700786	OMY1090UW	RM20090700188	RM20090702645	RM20090702440		RM20090700081		RM20090701181	RM20090700423		RM20090700702						RM20090702231
RM20090702069	RM20090702313	RM20090702040	RM20090702274	RM20090703964	RM20090701442	RM20090701173	RM20090700774	OMM5126	RM20090700159	RM20090702577	RM20090702432		RM20090700079		RM20090701164	RM20090700332		RM20090700619						RM20090702184
RM20090702054	RM20090702276	RM20090702021	RM20090702256	RM20090703949	RM20090701420	RM20090701139	RM20090700753	OMM5090	RM20090700140	RM20090702556	RM20090702415		RM20090700049		RM20090701158	RM20090700325		RM20090700540						RM20090702165
RM20090702046	RM20090702253	RM20090702010	RM20090702226	RM20090703936	RM20090701346	RM20090701066	RM20090700707	OMM1491	RM20090700086	RM20090702525	RM20090702409		RM20090700033		RM20090701153	RM20090700316		RM20090700536						RM20090702087
RM20090702022	RM20090702141	RM20090701873	RM20090702223	RM20090703883	RM20090701305	RM20090701033	RM20090700682	OMM1270	RM20090700070	RM20090702515	RM20090702406		RM20090700024		RM20090701056	RM20090700289		RM20090700518						RM20090702077
RM20090702020	RM20090702115	RM20090701869	RM20090702220	RM20090703850	RM20090701297	RM20090701008	RM20090700656	OMM1089	OMY1177A	RM20090702414	RM20090702364		RM20090700011		RM20090701041	RM20090700272		RM20090700440						RM20090702074
RM20090702000	RM20090702113	RM20090701864	RM20090702209	RM20090703838	RM20090701290	RM20090700999	RM20090700645	OMM1060	OMY1000UW	RM20090702400	RM20090702355		ONEU8		RM20090701032	RM20090700253		RM20090700434						RM20090702061
RM20090701959	RM20090702102	RM20090701782	RM20090702208	RM20090703825	RM20090701277	RM20090700996	RM20090700600	CA061915	OMM5312	RM20090702397	RM20090702337		OMM5192		RM20090700972	RM20090700221		RM20090700409						RM20090702036
RM20090701845	RM20090702059	RM20090701749	RM20090702176	RM20090703752	RM20090701276	RM20090700913	RM20090700566	BX863758	OMM5267	RM20090702309	RM20090702245		OMM5174		RM20090700946	RM20090700176		RM20090700394						RM20090701940
RM20090701787	RM20090702038	RM20090701723	RM20090702133	RM20090703747	RM20090701254	RM20090700905	RM20090700517	BX310634	OMM5195	RM20090702273	RM20090702212		OMM5153		RM20090700922	RM20090700050		RM20090700363						RM20090701892
RM20090701779	RM20090702034	RM20090701722	RM20090702129	RM20090703726	RM20090701232	RM20090700893	RM20090700514	BX082639	OMM5108	RM20090702264	RM20090702063		OMM5143		RM20090700916	RM20090700032		RM20090700329						RM20090701882
RM20090701770	RM20090702029	RM20090701714	RM20090702124	RM20090703667	RM20090701214	RM20090700891	RM20090700507		OMM3102	RM20090702262	RM20090702055		OMM3044		RM20090700902	RM20090700018		RM20090700287						RM20090701870
RM20090701747	RM20090702024	RM20090701682	RM20090702111	RM20090703659	RM20090701212	RM20090700836	RM20090700483		OMM1544	RM20090702185	RM20090702012		OMM1643		RM20090700896	RM20090700001		RM20090700277						RM20090701841
RM20090701696	RM20090701970	RM20090701638	RM20090702068	RM20090703648	RM20090701204	RM20090700832	RM20090700395		OMM1451	RM20090702180	RM20090702006		OMM1467		RM20090700887	OMM5116		RM20090700209						RM20090701820
RM20090701686	RM20090701963	RM20090701633	RM20090702039	RM20090703644	RM20090701141	RM20090700827	RM20090700382		OMM1448	RM20090702121	RM20090701994		OMM1443		RM20090700876	OMM5074A		RM20090700168						RM20090701702
RM20090701683	RM20090701957	RM20090701624	RM20090701990	RM20090703616	RM20090701024	RM20090700820	RM20090700359		OMM1438	RM20090702104	RM20090701984		OMM1312		RM20090700871	OMM5026		RM20090700152						RM20090701648
RM20090701666	RM20090701944	RM20090701609	RM20090701976	RM20090703605	RM20090700964	RM20090700817	RM20090700353		OMM1412A	RM20090702086	RM20090701982		BHMS429		RM20090700853	OMM3126		RM20090700147						RM20090701627
RM20090701619	RM20090701937	RM20090701598	RM20090701910	RM20090703583	RM20090700936	RM20090700762	RM20090700278		OMM1332	RM20090702085	RM20090701907				RM20090700809	OMM3065		RM20090700067						RM20090701602
RM20090701553	RM20090701855	RM20090701564	RM20090701889	RM20090703573	RM20090700930	RM20090700759	RM20090700267		OMM1257	RM20090702060	RM20090701895				RM20090700736	OMM1808		RM20090700048						RM20090701580
RM20090701517	RM20090701833	RM20090701484	RM20090701888	RM20090703569	RM20090700892	RM20090700737	RM20090700261		BX873975A	RM20090702018	RM20090701827				RM20090700734	OMM1798		OMM5327						RM20090701578
RM20090701511	RM20090701785	RM20090701461	RM20090701849	RM20090703546	RM20090700885	RM20090700715	RM20090700252		BX319411	RM20090701951	RM20090701824				RM20090700723	OMM1712		OMM5216						RM20090701562
RM20090701492	RM20090701725	RM20090701410	RM20090701844	RM20090703544	RM20090700883	RM20090700700	RM20090700220			RM20090701938	RM20090701799				RM20090700703	OMM1607		OMM3067						RM20090701507
RM20090701440	RM20090701684	RM20090701397	RM20090701843	RM20090703538	RM20090700828	RM20090700686	RM20090700197			RM20090701899	RM20090701776				RM20090700663	OMM1361A		OMM1657B						RM20090701490
RM20090701414	RM20090701660	RM20090701372	RM20090701790	RM20090703526	RM20090700818	RM20090700680	RM20090700167			RM20090701897	RM20090701748				RM20090700648	OMM1357		OMM1412B						RM20090701466
RM20090701412	RM20090701615	RM20090701366	RM20090701758	RM20090703457	RM20090700808	RM20090700672	RM20090700128			RM20090701894	RM20090701741				RM20090700630	OMM1306		OMM1241						RM20090701446
RM20090701382	RM20090701587	RM20090701345	RM20090701691	RM20090703450	RM20090700750	RM20090700662	RM20090700114			RM20090701837	RM20090701733				RM20090700625	OMM1201		BX873975B						RM20090701378
RM20090701362	RM20090701577	RM20090701341	RM20090701653	RM20090703433	RM20090700740	RM20090700643	RM20090700102			RM20090701835	RM20090701650				RM20090700586	CA367675								RM20090701370
RM20090701353	RM20090701519	RM20090701288	RM20090701642	RM20090703423	RM20090700739	RM20090700584	RM20090700078			RM20090701832	RM20090701640				RM20090700569	CA055420								RM20090701364
RM20090701306	RM20090701488	RM20090701234	RM20090701637	RM20090703419	RM20090700729	RM20090700552	RM20090700020			RM20090701774	RM20090701632				RM20090700485									RM20090701344
RM20090701269	RM20090701473	RM20090701213	RM20090701590	RM20090703380	RM20090700689	RM20090700480	RM20090700019			RM20090701740	RM20090701630				RM20090700459									RM20090701327
RM20090701266	RM20090701439	RM20090701171	RM20090701543	RM20090703373	RM20090700673	RM20090700462	OMM5176			RM20090701694	RM20090701613				RM20090700413									RM20090701325
RM20090701247	RM20090701434	RM20090701125	RM20090701542	RM20090703340	RM20090700670	RM20090700427	OMM5058			RM20090701680	RM20090701604				RM20090700405									RM20090701324
RM20090701203	RM20090701399	RM20090701106	RM20090701533	RM20090703335	RM20090700627	RM20090700425	OMM1632			RM20090701654	RM20090701582				RM20090700366									RM20090701319
RM20090701191	RM20090701304	RM20090701084	RM20090701521	RM20090703292	RM20090700565	RM20090700406	OMM1459			RM20090701626	RM20090701570				RM20090700360									RM20090701236
RM20090701174	RM20090701296	RM20090701049	RM20090701514	RM20090703218	RM20090700461	RM20090700403	OMM1295			RM20090701622	RM20090701557				RM20090700302									RM20090701225
RM20090701149	RM20090701292	RM20090701044	RM20090701493	RM20090703213	RM20090700437	RM20090700399	OMM1265			RM20090701620	RM20090701459				RM20090700214									RM20090701209
RM20090701118	RM20090701264	RM20090701021	RM20090701430	RM20090703195	RM20090700362	RM20090700338	OMM1207			RM20090701597	RM20090701441				RM20090700133									RM20090701198
RM20090701088	RM20090701251	RM20090701015	RM20090701416	RM20090703185	RM20090700349	RM20090700328	OMM1109			RM20090701538	RM20090701417				RM20090700126									RM20090701186
RM20090701086	RM20090701240	RM20090701013	RM20090701405	RM20090703183	RM20090700342	RM20090700310	OMM1097			RM20090701528	RM20090701396				RM20090700045									RM20090701146
RM20090701060	RM20090701237	RM20090700899	RM20090701404	RM20090703179	RM20090700323	RM20090700298	OMM1069			RM20090701524	RM20090701337				RM20090700040									RM20090701069
RM20090700992	RM20090701190	RM20090700868	RM20090701400	RM20090703128	RM20090700299	RM20090700273	OMM1055			RM20090701500	RM20090701318				RM20090700039									RM20090701038
RM20090700927	RM20090701176	RM20090700859	RM20090701340	RM20090703124	RM20090700290	RM20090700243	CR371139			RM20090701363	RM20090701317				OMYRGT6TUFA									RM20090701026
RM20090700895	RM20090701166	RM20090700844	RM20090701326	RM20090703120	RM20090700271	RM20090700222	BX870052A			RM20090701335	RM20090701301				OMYOGT4TUF									RM20090700990
RM20090700886	RM20090701124	RM20090700829	RM20090701282	RM20090703091	RM20090700268	RM20090700151				RM20090701284	RM20090701223				OMM5281									RM20090700975
RM20090700861	RM20090701077	RM20090700812	RM20090701262	RM20090703066	RM20090700244	RM20090700141				RM20090701224	RM20090701178				OMM5162									RM20090700928
RM20090700840	RM20090701064	RM20090700789	RM20090701260	RM20090703052	RM20090700238	RM20090700132				RM20090701216	RM20090701116				OMM5133									RM20090700918
RM20090700792	RM20090701050	RM20090700760	RM20090701243	RM20090703039	RM20090700229	RM20090700107				RM20090701177	RM20090701104				OMM1362									RM20090700881
RM20090700779	RM20090701034	RM20090700752	RM20090701242	RM20090703012	RM20090700213	RM20090700086				RM20090701122	RM20090701098				OMM1325									RM20090700872
RM20090700722	RM20090701019	RM20090700731	RM20090701230	RM20090702982	RM20090700180	RM20090700047				RM20090701115	RM20090701094				OMM1221									RM20090700802
RM20090700652	RM20090700980	RM20090700698	RM20090701221	RM20090702943	RM20090700171	OMM5255				RM20090701095	RM20090701091													RM20090700798
RM20090700650	RM20090700976	RM20090700692	RM20090701200	RM20090702923	RM20090700072	OMM5233				RM20090701055	RM20090701067													RM20090700771
RM20090700636	RM20090700950	RM20090700634	RM20090701155	RM20090702919	RM20090700071	OMM3121				RM20090701036	RM20090701040													RM20090700756
RM20090700624	RM20090700932	RM20090700578	RM20090701148	RM20090702917	RM20090700031	OMM3056				RM20090700956	RM20090700967													RM20090700751
RM20090700620	RM20090700879	RM20090700519	RM20090701070	RM20090702883	RM20090700025	OMM1740				RM20090700912	RM20090700957													RM20090700738
RM20090700614	RM20090700855	RM20090700473	RM20090701068	RM20090702879	RM20090700009	OMM1662				RM20090700882	RM20090700940													RM20090700725
RM20090700606	RM20090700810	RM20090700468	RM20090701045	RM20090702820	RM20090700002	OMM1557				RM20090700850	RM20090700904													RM20090700706
RM20090700605	RM20090700806	RM20090700450	RM20090701027	RM20090702752	ONE10ASC	OMM1513				RM20090700787	RM20090700874													RM20090700681
RM20090700601	RM20090700796	RM20090700444	RM20090700978	RM20090702710	OMY1225UW	OMM1381				RM20090700764	RM20090700839													RM20090700642
RM20090700598	RM20090700772	RM20090700433	RM20090700974	RM20090702687	OMY1002UW	OMM1277				RM20090700721	RM20090700833													RM20090700628
RM20090700588	RM20090700709	RM20090700408	RM20090700943	RM20090702662	OMM5316	OMM1236				RM20090700697	RM20090700819													RM20090700572
RM20090700571	RM20090700687	RM20090700384	RM20090700924	RM20090702644	OMM5306	OMM1234				RM20090700655	RM20090700816													RM20090700557
RM20090700562	RM20090700659	RM20090700341	RM20090700897	RM20090702637	OMM5254	OMM1158				RM20090700646	RM20090700781													RM20090700538
RM20090700541	RM20090700647	RM20090700279	RM20090700884	RM20090702612	OMM1768	OMM1155				RM20090700585	RM20090700724													RM20090700524
RM20090700494	RM20090700597	RM20090700274	RM20090700788	RM20090702565	OMM1753	OMM1056				RM20090700515	RM20090700717													RM20090700495
RM20090700489	RM20090700580	RM20090700257	RM20090700749	RM20090702561	OMM1749	OMM1030				RM20090700513	RM20090700683													RM20090700436
RM20090700467	RM20090700523	RM20090700210	RM20090700677	RM20090702506	OMM1661A					RM20090700477	RM20090700676													RM20090700432
RM20090700458	RM20090700522	RM20090700201	RM20090700674	RM20090702486	OMM1628					RM20090700457	RM20090700671													RM20090700431
RM20090700417	RM20090700508	RM20090700187	RM20090700638	RM20090702477	OMM1539A					RM20090700422	RM20090700666													RM20090700412
RM20090700374	RM20090700484	RM20090700165	RM20090700593	RM20090702462	OMM1465					RM20090700373	RM20090700653													RM20090700407
RM20090700372	RM20090700451	RM20090700138	RM20090700509	RM20090702456	OMM1214					RM20090700371	RM20090700637													RM20090700346
RM20090700365	RM20090700415	RM20090700066	RM20090700498	RM20090702452						RM20090700361	RM20090700610													RM20090700340
RM20090700327	RM20090700364	RM20090700036	RM20090700496	RM20090702444						RM20090700357	RM20090700604													RM20090700333
RM20090700300	RM20090700358	RM20090700014	RM20090700400	RM20090702408						RM20090700320	RM20090700599													RM20090700313
RM20090700284	RM20090700355	RM20090700010	RM20090700392	RM20090702396						RM20090700286	RM20090700592													RM20090700305
RM20090700280	RM20090700315	OMM5324	RM20090700389	RM20090702381						RM20090700255	RM20090700590													RM20090700295
RM20090700266	RM20090700307	OMM5275	RM20090700375	RM20090702333						RM20090700249	RM20090700561													RM20090700293
RM20090700242	RM20090700291	OMM5204	RM20090700368	RM20090702332						RM20090700218	RM20090700530													RM20090700239
RM20090700230	RM20090700276	OMM5164	RM20090700351	RM20090702321						RM20090700170	RM20090700529													RM20090700227
RM20090700207	RM20090700262	OMM5121	RM20090700281	RM20090702320						RM20090700125	RM20090700478													RM20090700211
RM20090700198	RM20090700250	OMM5005	RM20090700245	RM20090702242						RM20090700091	RM20090700469													RM20090700182
RM20090700194	RM20090700183	OMM3120	RM20090700215	RM20090702194						RM20090700060	RM20090700390													RM20090700177
RM20090700172	RM20090700166	OMM1599	RM20090700202	RM20090702153						RM20090700027	RM20090700379													RM20090700173
RM20090700161	RM20090700158	OMM1391C	RM20090700190	RM20090702140						OMM5099B	RM20090700377													RM20090700144
RM20090700155	RM20090700157	OMM1391A	RM20090700175	RM20090702084						OMM3020	RM20090700354													RM20090700096
RM20090700143	RM20090700156	OMM1337	RM20090700134	RM20090702044						OMM1708	RM20090700334													RM20090700095
RM20090700111	RM20090700154	OMM1085	RM20090700130	RM20090702015						OMM1661B	RM20090700330													RM20090700051
RM20090700105	RM20090700142		RM20090700090	RM20090701997						OMM1619	RM20090700304													RM20090700043
RM20090700099	RM20090700139		RM20090700075	RM20090701991						OMM1433	RM20090700228													RM20090700023
RM20090700058	RM20090700129		OMY4DIAS	RM20090701968						OMM1375	RM20090700110													RM20090700016
RM20090700042	RM20090700122		OMM1582	RM20090701964						OMM1333	RM20090700085													RM20090700003
OMY1032UW	RM20090700120		OMM1449	RM20090701960						OMM1313	RM20090700056													OMM5138
OMM5288	RM20090700083		OMM1408	RM20090701954							RM20090700052													OMM5065
OMM1776	RM20090700065		OMM1322	RM20090701950							RM20090700008													OMM3144
OMM1543	RM20090700054		OMM1298	RM20090701946							OMY105INRA													OMM3142
OMM1302	RM20090700026		OMM1211	RM20090701945							OMM5152													OMM3076
OMM1205	OMY1INRA		OMM1194	RM20090701929							OMM1711													OMM1658
OMM1152	OMM5198		OMM1170	RM20090701876							OMM1656													OMM1548
OMM1082	OMM1573		BX087219	RM20090701872							OMM1462													OMM1532
19NUIG	OMM1391D		ALNTUF	RM20090701858							OMM1368													OMM1389
	OMM1391B			RM20090701810							OMM1341													OMM1054
	OMM1347			RM20090701786							OMM1200B													BX881655
	OMM1228			RM20090701753							OMM1130
	OMM1131			RM20090701743							OMM1096
				RM20090701713							GH1
				RM20090701706							BX311224
				RM20090701649
				RM20090701541
				RM20090701534
				RM20090701516
				RM20090701485
				RM20090701479
				RM20090701470
				RM20090701437
				RM20090701373
				RM20090701371
				RM20090701369
				RM20090701352
				RM20090701336
				RM20090701320
				RM20090701312
				RM20090701302
				RM20090701299
				RM20090701271
				RM20090701211
				RM20090701179
				RM20090701161
				RM20090701127
				RM20090701058
				RM20090701052
				RM20090701028
				RM20090701009
				RM20090701000
				RM20090700998
				RM20090700995
				RM20090700994
				RM20090700985
				RM20090700968
				RM20090700962
				RM20090700914
				RM20090700910
				RM20090700863
				RM20090700852
				RM20090700848
				RM20090700813
				RM20090700776
				RM20090700768
				RM20090700766
				RM20090700699
				RM20090700675
				RM20090700669
				RM20090700660
				RM20090700649
				RM20090700632
				RM20090700574
				RM20090700568
				RM20090700555
				RM20090700491
				RM20090700479
				RM20090700443
				RM20090700429
				RM20090700419
				RM20090700369
				RM20090700347
				RM20090700269
				RM20090700240
				RM20090700237
				RM20090700236
				RM20090700235
				RM20090700217
				RM20090700189
				RM20090700148
				RM20090700146
				RM20090700113
				RM20090700109
				RM20090700106
				RM20090700092
				RM20090700062
				RM20090700053
				RM20090700035
				RM20090700013
				OMM5213
				OMM5035
				OMM5025
				OMM3111
				OMM1660
				OMM1636
				OMM1516
				OMM1508
				OMM1439
				OMM1075

## Sheet: 3) RAD SNP Sequences
RAD ID Fam 2009070	Seq
RM20090700001_25AG	TAATGGTGATGGGGGGAGGTCAGG[A/G]ACAGGGGTCGACTGGCCAGACAGAAGCTCTGGAGAAGATTTGGAGGGCTCCAAACA
RM20090700002_30AT	CTTAGCAACTTCAATCCTTTATTTTTAGA[A/T]GCATTGGAATTGTTTCAGCTAGCCTCTCGCTCAAAGGACAGACCTATTGTT
RM20090700003_45AG	GGAGAAAAGCATGATCCCTGACCTCTGTCTCTGTTAGATTGATT[A/G]AATGGCGAAAATGCACTTGTACTTGTGTGAGGGTAC
RM20090700005_27CT	GCGCGTTAATGCACCACCACCACTAG[C/T]CATGTGTGCATGTTGGCATAGTTTATAATTAATTAGTGGAGATGTTAATTTCCC
RM20090700007_77AG	GTTTCATGTACGAATCCATTGAGCTCCCTGGTTTCTGGGAGTGTTTCCTCAAAAGGTCTAGCGAGAAGGCCCTGTT[A/G]TGTA
RM20090700008_7AC	CCCAGC[A/C]CAGCCAAGGAAAGCCCCACTAGTCAAACCCTCCCCTACCCCAGATGGGCTGGATCGAACTCCAGGCTGTAGTGG
RM20090700009_21AG	ATTAAGACCTATTTTAAAAA[A/G]GGGATAGTTTCCCTACATTTATTATAATTTTTTACCAAATTCTTAAAAAGGTGCAATATG
RM20090700010_37CT	CTTTCTCATGCAGTTTTGTCCTTTGTAGCTCAGTAG[C/T]GCTTATGTCAGTGTAGTGGGTTTGATTCCCGTGACTACCAATAC
RM20090700011_24AG	TGATGTTCGGATGTACCTGTGCA[A/G]GTGTTGTTACACGTGGTCTGCCACTGCGAGGACGATCAGCTGTCCGTCCTGTCTCCC
RM20090700012_38CT	GGATACCACATGAGGGAGGAGGATATCTTCCCTGTCA[C/T]GCATACTGTTGAAATTGCCTGCAATGACAACAAGCTCTGTCCG
RM20090700013_27GT	TGACAACTGGCCCTGGTCAAGGAAAA[G/T]AAGGGATGGAGGAAAACAAGTTCACTGGCTTTATACAATACAGTATGCATCTAA
RM20090700014_81AT	ACAGTAGAGTGGAAGGATGAAAAGATTGAGGTATGCCCTGTGAACTCTGATCCATTTACTTTGTTAGTACATTTGGTGTA[A/T]
RM20090700015_58AG	TGTTGGCTTGGTCACATGGTCCTTCATCGCCTGGGAAATGCCTGGAGAAAGAAAAGT[A/G]GGAGGCCTTGGTTAGAGAGATGG
RM20090700016_30CT	GAGCTGACAGGAAGTAGTGTGTTTGACTA[C/T]GTCCACCCTGGCGATCATGTGGAGATGGCAGAGCAGCTGGGCATGAAGCTG
RM20090700017_49AG	GAACCCCGTTGGGCAGGAGAGGGTGACTACCCCCCCAACCGGGGTGAG[A/G]TCCTCCCCCGTGACCATGACGTGGGTGGGGAG
RM20090700018_27CT	TGTGGGGAAAACAATGTGTCGTCACC[C/T]AGGTTACCCGATTGGCACAGCAAAAACTTGACATTTTTCTAAGACCATTTTCTT
RM20090700019_30CT	AGGAGAGGGGAGACCAGTATTACAATTGG[C/T]AAAGACTGGTTGGAAAGGTGCTTATATCAGTGGTTTACTGTCACGTTGTAA
RM20090700020_79CT	GACTGAAGTAGCTTTGACGAATAGAGCGAGACAGCACGTTGGAAAACTGTGAATAGAGTTGCTTCTTCGATCTTGAGT[C/T]TC
RM20090700021_21CT	ACCCCCACCTCTGAGTTCAG[C/T]TAGGAGTTCTACAAGTGAAACAAATAGTTTCCTGACTTCTTTTTTTCAATGCTGCCTGCC
RM20090700023_28AG	TGGGCTAGCGTCCGTACCATTCCCGTT[A/G]ACTACAACCTTCCCACCATCCCCGTTGACTATGAGGGAGGTTAGTTCCCTGGC
RM20090700024_53GT	TATCTGGAGTCCATGTTTACCTGTGTGGTAGGATTGGGGTCAGTTGTGTTTC[G/T]AATTCTACTCTCGGCACATACAGTGACA
RM20090700025_71AT	ACTTCTACTTCTGACAGGCTACAAATAAATAGTTCACTTTTGTCTGTTGTGCTAATGCCAGAGATCTGGG[A/T]ATGCGTCCCA
RM20090700026_3AG	CC[A/G]CAACTGAGATAGGAGTCAATCAAGACAGGTGCACTAAATGGGGTCAGCCCTACTGGTGAGTATGCAGGCCATGGAAGA
RM20090700027_75CT	TGAAATATGCTACTCTCTTTATTTACTGCTGTGCTATCATCAGATAATAGCTTCTTATGCTTTCACCGAAAATA[C/T]TTTGTT
RM20090700030_64CT	GACCCCATCTTCTCTGATAAAAGTCAGAGAAAGTATTTAGTTTGGCCCATTAGACATCACTGC[C/T]CAGTGCTCACTGTCCAT
RM20090700031_40AG	GTCCACCCTGGAGATGCAGTTCCCTGCCAGGTTCAACAC[A/G]CGCAGCTCAGACAGGTGGGAAAGGTTCTCTATCTGGGAGAT
RM20090700032_2AT	G[A/T]AGTCTCTACTGAGAGACACTGATGGATTTACCATCAGCACTGCATGGGAGGTGATAAAATAGCCAGACTGCTGAAATGG
RM20090700033_43CT	AGCTGTGGGGTCAGAAGGAGTGTTGGGGTGTCTATCTGTCTG[C/T]AGGATAGCTGTGGGGTCAGTAGGAGTGTTGGGGTGGGC
RM20090700034_25AG	CAGCGGTGAGTCACAAAGGTAGTT[A/G]TCCCATCTGTCTGTTAGCTCAACACTGCCCTCTACTGCTCCACCCCACCTCCAGAC
RM20090700035_43CT	ACTCTGCTTTTCTTCACAATATATCCTACAATACAGAGAATA[C/T]AGGTTGTAGTTGGTTGAGACTTTTAGTATGAGAATGTA
RM20090700036_4CT	GCT[C/T]TCCACGTATTGCAGCAGGTAGAGGCCGCAGTCGCTGCTGTTGTCCTGTAGGGGGACCTTACAGTGGGAGCCTTGCAT
RM20090700037_40AG	TGTAGTGGTGTGAAATGTAAACAGATACATAGTTTGGTG[A/G]CTTCCTCTCGGGTGCTGCGGGTTTTTAATGCATTCCACAGA
RM20090700038_39GT	ACCTGCCCCTATTATCTGAAAGACAGAGGGTATCCTAC[G/T]CCTCTAGTTGGCAAGACATTTTTTCTTTAAGCCTTTTCTGGC
RM20090700039_66CT	TTTTGTACCTTTAGCACTAAATGTTGTCCTCTTGTGAGAAACCACAAATGGAGTGACCCTGCGGA[C/T]GTATACTCTGCATTA
RM20090700040_74CT	GCTCTTCAGGTGCTCCTTCTGTTGGAACATGCTCTAGCAGAGGTAACGGCGCTGGGTCTTCTGCAGAGGGCGA[C/T]GGGCCAT
RM20090700041_63AG	GCGGCATGGCAGGAGGTGTAGCGTGACTCTGTGGCGTAGTCCAGCAGCCCCAGGCCCAGCAC[A/G]GGCAGAGGGAGCGCGTTG
RM20090700042_4CT	TTC[C/T]TATTTTTGTGCAGGAATGCTGTGACTTTTTGGTAAGGGATCATGCATCCTGTGATTGGTCAGATGCTCCTAACTAGC
RM20090700043_17AT	CCTACTCTATGAGATA[A/T]AACAGTAGAGAAAGCCCTGTGTCCCTGCACGCACGTATGAGACATAACAGTAGAGAAAGCCCTG
RM20090700044_60AT	CTGGTTGGCTATCGTCGAAGGTCGAAATTGTAGCTAATGTAGGATGTCCACATGTCTTT[A/T]TTTGTAAGATAGAAGAATCCA
RM20090700045_58GT	CACGCTCACCAGCCTTTCCAGGTTTGCCAGCCTCACCCTAAAAATAAAGAGAGGGAG[G/T]AATGATTGATTATGATTATAGGT
RM20090700047_35AG	GAGACCTCAAAAGCTTTTACTTCAAGTGAATGAC[A/G]CAAAGGACGACCCTGTTTATTGGTTAAACATTCATTTTGACAAAAA
RM20090700048_61CG	ATTGTTTTACAAGGTGTTATGCAGAGTCTGTTATCCCCTATCTCCAGCGATGAGAATCGT[C/G]TAGCTATGATGAGTTCCTAC
RM20090700049_52AC	TCCTTTGCAAATGAGACCCTGGTCTTAATTGGACTACTTAAATAAATCAAT[A/C]TCCTGGCTTTCATGATCCACCTCTCATTG
RM20090700050_51CT	GTGCCTCTTATGGGAATGCTGTGGGAGGAGGAGGGACTGGGGTCAGACAC[C/T]ATCTTTACTGCTACAGATCACACACAAACA
RM20090700051_3GT	TC[G/T]CCTCAATGATGTGGAACACGTTCCTCGTTAAACGTTTCTCAGCTGCTGCTTTCCTTATGGAGAAGGTGAGCAGCAATT
RM20090700052_71CT	CAGATAACCTGGATCCCTACCTCTTAAAGATAGCAGCTGGTATTATTACTGAACCTGTGGCTCACGTTTT[C/T]AACTTGAGTC
RM20090700053_4AT	GAG[A/T]GCGAAAAGAGAGACACACCATCACCATGCAGGCCTTATCCTCAATTACCCTGTGGCGAAACAGGAACACACACACGA
RM20090700054_70CT	GGGCGGAGTTTTCCCTGGCACCGTGTCCACCGTCAGGGTGTAGGTGTTCAGTCTAGGGTGGTGCTGCAG[C/T]GCTCGGCCTCC
RM20090700056_41AG	ATTTGGAGGGCAGAGCAATGATCAGAGAGCCTGCGACATT[A/G]GTGATAACCAACGCCACAAGATCAGACTCAGCCAGTTACC
RM20090700057_45AG	CTCAAAGGTGGGCCGCTCCTCGGCGTCCTTCCTCCAGCAGGTCA[A/G]CATGAGGTCGTGGAGGGACTCAGGGCACTCAGCTGG
RM20090700058_58GT	GGTGGAGTTGATGGGCTTCTTGACCTCGTAGCCCAGCAGGTAGAGAGCCAGGTTGGG[G/T]GTCTTCAGTTCCAGGGAGGTGAT
RM20090700059_33CT	TACACCTGTCCACAGTGTGAATCTGGCTTCAT[C/T]GAAGAGCTATCAGAGGAAAGAAGGTACAGTATTATCTGCTTGTCTATC
RM20090700060_75CT	CATTACCGATGCCATTATATTTGTACGAGCAGCAGATCAGCGTAATAGGCAAAGGAATATACCCTACTGACCTC[C/T]ATTATG
RM20090700061_9AG	TTTGGAGC[A/G]AGAGGAGAAAGACAGGAGGAGGAAAGGATGAGAGGAAACACAATGTTTGAATGCTTGTCATTGTGTGGATGA
RM20090700062_53AC	TTAACACACATTGGTTTTTCAGAGTCAGTAATTAGACCACAGTAATATACTT[A/C]ATCTTATATGTTAAAAAATGTACACAGA
RM20090700063_17CT	ACACGACAGCCACCGC[C/T]GTCCGTCTGTAACTCCTCTGTTACTGTTGGGCCAGCAGGGCAGCGGAGACACCAGGCTCTCCTC
RM20090700065_79GT	CAGACGATGCTGCAGGCGAGGCTTGAAGCCTGGGTACCTCATCTCCATGTTGCTGCACAGTAAACACCCTTCTCACAC[G/T]AG
RM20090700066_81CG	CATCCTGACATTCCACCAGCAATACTGCTCGTTCTGTGCGTGATTTCCTGCAAGACAGGAATGTCAGGGTTCTGCCATGG[C/G]
RM20090700067_65GT	ATCATTATCTCTGTTTTATACCGCTTTGTTGTGAAAGGTGCAATAAAAATCCATGAGATAAATG[G/T]TAGCTCCGTGTTATTC
RM20090700069_5AG	CAGG[A/G]ATGTGCATTCCAGCACAAGCTAGAGCTGGGTTGTGGATCTTGATTAGTAGGAGATGGGAAATCTGCAGGCAAGAAG
RM20090700070_14GT	ATTTCTGACAACT[G/T]GGATCGGGGAGATAGTTCCTCACTGGCAGAGTGACCGAAGTATAAACCCCTTTTTTAGACAGGTGGG
RM20090700071_21CT	GAGAGACTTGCCTGTAGACA[C/T]GTAAAGACAACAACATAATGGACCTGTGTAACACACGGAGGAAATAGAAAATAGGAGAAA
RM20090700072_40AC	CAAGTTTTCCTGCTTGTTTATAGCCTTGTACAGTTCGTT[A/C]AGTGCCAGCTTGTTATTCATCTTGTCTTGAGTTAGAATGTA
RM20090700074_11AG	GGCCAATCAC[A/G]GTCAGGATCCAGGGGCTGTATCTATGTGGAAACCTCATCCAGCGAATGCCTAACAGACTTATAACTGACA
RM20090700075_12AG	TTTTCTCAACT[A/G]GATTTGCTCACCTCCTGCGTCCTCTCTCCTCCGTCATCTCTCGCCTCCTTTTGAAAAGGATCAAAGGGA
RM20090700076_50AT	TGTATATAGGCGACCACTTGTACGATAAGACACCTATTTGCATGTGTGT[A/T]GTCACTCCTTCCTGGCAGGTCTGGACCTGGT
RM20090700078_5CG	GCCT[C/G]GTGGCTGAGTCCTGTGACAGCTTGATGTATTGATATCCAGCTCACCGAGAAACCATCATCACCACTGGCCTGGCAC
RM20090700079_50CT	GAGGGCCAGTTAGAGGTTTTAAAACCTGTGTGATCACATCTGTCTGTAC[C/T]GCATCAGGAAGGTCTGAGTTGCAGCAGAGGA
RM20090700081_64CT	AGAACCCGACTGTTGGGGTCAAAGGTCAACAGAGCTGTTAAAACCCAGTCAGAGAGCAGTTGC[C/T]GCGGTAACAGACTGATA
RM20090700082_6AC	ACAGA[A/C]GGCAGTCGGCCTCAACACCACTGACAGCTCTCTTCATCCGCTGCCTCTCACTCCCGAGGAGTGGGCGTGCGCTCT
RM20090700083_7AG	GGCTCT[A/G]CAGAGGGAGATTGTCAGGCACCCATCTTCATTATGGTTCTGACACACAATAATATATACAGTGCCTTGCGAAAG
RM20090700084_51AT	TAATTTCTTTCTTAATAAACTTAAACTTGTAATTTGATCTATCTCCACTC[A/T]GTCTGGCCCATATTCCTCTACTACATTCAG
RM20090700085_28AC	TGAAATATGCTTTTCTCTTTTTTGTTT[A/C]CTATGGTGCTATCCTCAGATAATAGCATCATTTGCGTTCGCCGAAAAGCCTTT
RM20090700086_26AC	GGCTGGATGGAGGTACAGTATGGAA[A/C]CATGCAGGGGGTTAGATATCACACACACGACACTGTGTTCCCTACCATACACTTC
RM20090700087_7AG	GCCAGC[A/G]CCACTGTCCCAGACACAGTTACCTACAGGTGCAGGCCGGGTTACCAGATGAAGGGGTCCTACCCCCATGTTACC
RM20090700088_33AG	CCACATTCATATGTCCCGTTGCCTTTGTGGCA[A/G]ATTTCACTGTTCTCAGTGCCGTTTTTGTGACAGTCACATTCACAGATG
RM20090700090_71CG	AATCTTTTATTGAAGGCAAACCTACATGCACATCGCTAGAGCCCAAACATGCCCTCACTGGCACATCACC[C/G]CCTCAACTTT
RM20090700091_21AG	CAGTACCAGCGTCTGCCTCC[A/G]GTCTCTCTCACAGTCCCTCTCCTGACCCTACGCAAGCAACCACAGCACAAAAAAACAGAG
RM20090700092_55AG	CGACACATCTAGAAACAACAAAGCGCCCCCCAAAAATGGGATAGGCTCACTACG[A/G]TTTCAAACACAAACCCCATACGGAAG
RM20090700094_76AT	TGTGCGGAGGAATTTCTCTCTGTGGAAAAAGAGGAGTACTGTCATTAATAACATGTTACGACATGAAACACTTAA[A/T]GTAAA
RM20090700095_51AG	TAACCCAGACCAGAAAGAACCAGAACCAGCCAGAGAGCCATACTAAAGTG[A/G]AGAACCACCACCTTCCCCTTTTCTCTCTCT
RM20090700096_79AC	ACAGTAGGTATAATAATTTTATCTCAATCCTACTGCAGGGAATAGTAGTCACAGTCGTTTTACCTCATAACCTCCTGC[A/C]GG
RM20090700098_61CG	AGAGTTCAAAGCAGCATTACAACCATGCTTGCTAGTTTTAAGCCAATCTAAACGTTGTTT[C/G]TGTTTTATAACAGTTTAAAG
RM20090700099_78AG	GGGGACATTTGGCCAAACACCACCTCAGAGGTCAACATAATTTTCAAACCACAGGAGGCAAAGATTTATCAACAGAC[A/G]GTC
RM20090700101_58AG	TTTGGATGTATGACATGTAAAAAGTGTGGATAATGTGCTTTACTGTGCACCGATTTC[A/G]TCGATCTTCGGACGCCTTCGTTG
RM20090700102_44CT	AGGTACAGGACGGCAACAATAACTGCCCGAGTTACCCCAGGAA[C/T]GCACAATCCCTCCATCAGTGCTCCGAATGTCCGTAAT
RM20090700103_76AC	ACATTTACACTCCTCCTGAACATCTTTGCCCCAGAGTTTTAAACTCACTGAGGGACATGATAGACATTTTTATTT[A/C]TTGTA
RM20090700105_20AG	GTGTTACAATACAGTACAT[A/G]TTATCTCTGCAGGGGTCTCAGACAACCTGGCCCCCGATATTCCTTTTGTATTGTGCGGACA
RM20090700106_42AC	AGAGAGAGAGCACTGTAGAGCTGATCCACTGTAACCTGATC[A/C]TTTGGAACCTCACAGGAGAGTCATGACAGTGATGTAGAC
RM20090700107_54CT	TCCAGTAGTGTCTCCAGCTTCTCCAGTTCAGCTGTAGTTGGCATGGTAATGTT[C/T]GTTTTCTGTTGGGCCAGAGCATCCCTC
RM20090700109_35AG	GTACAAACGGGTGCCACATACTGAGGTTGCACCC[A/G]GCTCTTATCTGTACGCCCAGACTTATGACTAAGTCATACAAGACAA
RM20090700110_76CT	TAGAAACGGTACATCAGTGTAAGCCTTAACCAAATAAGCCCTTTGTACATTACAGATACAACCAAGCTAATGAAG[C/T]GTGTA
RM20090700111_28AG	AGTGTGTGTGCTGAGCGGAGGAACACC[A/G]GACTCTAGTGGAGGATCCATGACAATGCCGTCATTAACATAACATAACAACCT
RM20090700112_13GT	TCCCGTGGGAAT[G/T]CAGCCCTCTAGGGCTGTCAGTACACAACACTATGCTCATCATGTTTTAGCAGGATCAGATGGTGACAG
RM20090700113_6AG	CACTT[A/G]CTAGGCCTTAATCGCAAAGATGAAACTAGATAGCTTGTGCAAAGTATAGTGTCAGAGTTCAGACACATAGCAACA
RM20090700114_4AG	GAC[A/G]AGATCTTGTTGACATTCCTCTGGGGGAAGGTGCGTCATGCCCACCTCCATGGGATCAGTCTCGCTGGAGGTTCCTGG
RM20090700116_56AC	GAGATAGGGCTCCGACGGGTAGCGACGCAGAGGGGAGCCCTGCTGGTGGTGGTGG[A/C]GACGACCCCTTGGCCCGGTCTGTCC
RM20090700118_79CT	GCTCGTGGTAACGATGGTGCTGCTGGTGCTGCTGGTCCTCCTGTAAGTACTGACGGCAGCTATCTATTCACACATAAA[C/T]AG
RM20090700120_65AC	CATTCAGTGCATCAACTTTAAGCTGAATGATTCTTAGTATTCCATCATCCAGCAAACCAATATT[A/C]TTCCAGACGGTAAAAA
RM20090700121_43AT	AAACACACACAGAGAGATGTTTACCTTCCAACATCCATACAG[A/T]CAAGGCTTCAAAATAAGATCCTACAGTAAATCATTTAA
RM20090700122_17AG	AAAGGGTCAATAGCTA[A/G]GCTAGCTATCTCGATGAGTGTTACACCAGTGTTATTTGAGGCAATGAGGTTTTAAGGCTAAGTT
RM20090700123_61CG	GAGGAGGGTCGTTAGTGATTGGAGTCACCTGGGCTCAGGGTATTTAAATGGCTCCTCCAG[C/G]TATGATCCTGTTTTGTTTGT
RM20090700124_33CT	AAGTTTGAATCAAAAACTCAAGAATGTTTTCT[C/T]ATTAGTTATGATTTTATCCTCAGAAACAGCGACAATGGCTTCATGGTC
RM20090700125_78AC	CGTGGGTCACGGCCCCTGAATAAGAGTGACGAGGTGGTGTACCGTATTCACACCCCTGGGCCAAGGGTCAAACCTGG[A/C]CAG
RM20090700126_72CG	GTAAACATCTCCACAGGGAAGAAGGTGAAGGGAGGTTCTAGTAAGCTGACAGGACGGGTGCTGTCTATGTC[C/G]TTTGATGCC
RM20090700128_65AG	GCAGCCCACACCAGCCAACACAGAGCGTGCACGAATAGAGAGTTTCACACACCCACTTTGAGCC[A/G]TTGCAGACGGTGCAGC
RM20090700129_27AG	TCCAATGGGACTGGAGCTCATCTTGT[A/G]GTTAGACCGTTCCTTTCATTCCCTGTTCTGCAGGCACTGAGTAGATCCTAAAGA
RM20090700130_33AC	TCCTAAAATTATTTTAGAGGTTAATATTTAAT[A/C]ATTTTAGTCCCTGAATTCATATTGATTATTTTCTGCTTGGCCCTCCAA
RM20090700132_31CT	GTGTACCACATGAGGGAGGAGGATGTCTTC[C/T]ATGTAACGCAAAGCGTTGAGATTGCTTGTTGTCATTGCAGGCACAGTCTG
RM20090700133_60CT	GCCTACCTAGCTAAGCCGGGCCGTGTGCTGGCCGCCTCGCTGAACATCAGTGCCACAGA[C/T]GACGTGCTCTTCACCGTGTTC
RM20090700134_38AC	TTGGTGGTGTTAATAACATGCTGTACTGGTCTGACAC[A/C]TCTGTGGGCTGGCAATATGCCAGAGCATGATGAAGTGTGTCAA
RM20090700137_55GT	ACGTGCCTGTCACTATCACATTGTCCGTTGTAGAAACTGCCCAGCCTGCCTTCC[G/T]CACACCCCCCTCCACAATGCTTGAAT
RM20090700138_13GT	CGAGCACATCTG[G/T]TGAACAATGGACGACTGTAAAGACTTGGTGTGATGTATGAGAATCATAAAGTCTTTTGTCATCTAGTC
RM20090700139_15AG	CAACCTCAATAGAT[A/G]CATTTGGTTGCTGCAGTCTCAAAGCAATTGGCCAGCCAGTTTAAAATCAGCCCAGCCTTTTCTTAT
RM20090700140_78CT	CGTGTCACTTTCTCAACAGCAGTCAGAGGCCTGTCCCATTTCTGTCACACTTATGACACATAGCCTACACACGTGCA[C/T]GTG
RM20090700141_70GT	TAAGATAGGGGATCTGCGGCATTACAGACACACGCACACACATTCCAGAGTTGATACACATCTGGATGC[G/T]AAATTCTCTGT
RM20090700142_75AG	CAGAAACTGAGATCTAGAATCCATTGGGACCATCTTGCTCTCATTGACTCTGTACTAGGTGTGAGGTCTTCGCT[A/G]GTGGGT
RM20090700143_57CT	AGGGTTTGGTAGCAGCTAGTCAGGGATGGGGTGTGGCCTAGACACACTGTAAGATT[C/T]ACTGTAATCAAAGGCATTCACAGA
RM20090700144_28AC	AGCAATTACATTCTCTTTATACCCCGG[A/C]GAGATGGGCCTGTGCCTGGCAGACGCTTTGGCCGACATTGAATCCTCCTTGAG
RM20090700146_16AC	GAGGCAGAAGTAGTT[A/C]TCCACCCGTTTGCTGTCGTCGCCCAGGTAGACCTTAGCCTGGTCCAGGAACTCCTGAGTCACGTC
RM20090700147_60AG	ATGGCACAGGGCCAAGGCAACACAAAATACAAATACAAAAGGAGGGAGAGGGAAAAGAT[A/G]GAGCGAGTGGGAGGGGAAAGA
RM20090700148_67CT	GCGTGCCTGTCACAATCTGATTGTCCATTGCAGTAACTGCCCATCCTGCCTTCCTCACAGCCCCCT[C/T]CACACTGCTTCAAC
RM20090700150_62AT	AACAATTAGAGGTTATCATCATGATGATAATTTGGGTTGAATCAAGCTTGTTATTTCCCCT[A/T]TGGATCCTGTGGCGAGAAA
RM20090700151_16AG	AGTGAGGGGTCCCCG[A/G]CGTATACGATACGGGCCATTCTGGACTCAAGACGCCGGTGAGGGGCCTGCAGTACCTCGTGGACT
RM20090700152_12AG	CGACACACAAC[A/G]CAGAAATAAAAATATAAATCATGCCTTACCTTTGACGAGCTTCTTCTGTTGTCCCATAAACATCACAAA
RM20090700154_8CT	TAGCATA[C/T]TTCCAGATTAACCAAGTTGTTGTTGTTGAGGCGGGCATATTGACTTTAGATCTCCCCATGAGGCTGAGCTAAG
RM20090700155_22AG	CTTTCTTGAAGACCCCAGACA[A/G]CACTCAGCCAATGAGCTACAACAGTTGAACTCCTCTAAGTCAGATTCATCAGCTGTAGA
RM20090700156_15AG	GGGTACCACATGAG[A/G]GAGGAGGATGTCTTCCCTGTAACGCACAGCGTTACACAGATATTCCTGTCTTGCAGGATATCACGC
RM20090700157_51CT	TTTGAGCTGGCTACAGGAGACTACCTGTTTGAGCCCCACTCTGGAGAGGA[C/T]TACTCCCGGGATGAGGGTCAGTCTCTACAT
RM20090700158_46AG	CAGCAGTGGGACGGCGAGGTGCGGGCGGAGTCCCGGCACGCCGTC[A/G]AACTCAAGCAGCTCGACAACGGCACCAAGATCCCT
RM20090700159_28CT	ACCAGTGCCAGAACGCTAACCACACAT[C/T]AGCTATCATGGTGGAGGGGTAAGCCGTAGAGCAGATACATGTCCTCACCTGGT
RM20090700160_37AG	GCCACCATGAGGAGATGCTACAGGGCCTTTTAAAAG[A/G]GCTCCGTTCTTTGACGGAACGCCACGACCATGGGTTAAAGGCTA
RM20090700161_34CT	AAATACAGGTGTTTCCCTTCCTCCTTACTAGTT[C/T]TCTGGCTTTCTGCACAGCTGAAGGTTTAGGTCAGCTGGCCCACCATA
RM20090700162_66CT	AGAGACCCAAAGGCTGTGTATCACTGGTTTTCTGAATGTTGGTCGATCCTCTCATGGCAATAAAG[C/T]CAATTTGAATTTGAG
RM20090700164_23CT	GGGCTCAGGCTCCACTGTCTTG[C/T]CCTTGAAGAAGCCACGCTCCACCCCATGACGCAGGAAGCCCAGGTCACACGTGGCCAA
RM20090700165_75AG	TAATGTGTTACCATGGTATTATCCTGCTGTAAGGACACACACAGTGTAAAGGTAATGCTCATCTGCTGAGGAGT[A/G]ATGTCA
RM20090700166_29AG	TGAAATATGTTTTCTCTTTTTGTTTACG[A/G]AGGTGCTACCCTCAGATAATAGCATTGTTTGCTTTTGCCGAAAACCCTTTTT
RM20090700167_45CT	GGGTATCACATGAGGGAGGATGATGACTTCCCTGTAATGAAAAG[C/T]GTTGAGACTGCAGGCAATGACAAGCGCAGCCCGATG
RM20090700168_51GT	GAGGGTAGAAAATAAACTTTACAAACATGGAAGAGAATGCTACATATGGA[G/T]ATTTTTTTGTCAATTATCTGGTCAAGTTCA
RM20090700169_10CT	CTGTTGCTT[C/T]TCCACAATTTCAGTTTGACGAATGCGTGTGACAGCTTTATCCAGTGTGAGTTCTGGGTCCATTTGTAATTG
RM20090700170_46AG	GTGTTTGGGGTCACCAAGCAGCCAGCTAACATTCTAGAATTCAGT[A/G]TTCTAGAGCTCATTCCTCGGTCTGAACTCCAAGCA
RM20090700171_10CT	ATAGGGCTT[C/T]GGTCAAAATATGACACTGTAAAGCCAAAGGTTTTCTTCTCTCACCTGGATGTTTGACCCCCGACTCCTTCC
RM20090700172_49CT	GAATCTCGGCCACCTTCACACACACTAAGTACACCGCGCTCCCTTAGG[C/T]GTGCCAGTTTGTGCTTGCTCGTGTCACCTCTT
RM20090700173_24CT	TGTTAAGGACTTGTTGAGGTCAA[C/T]GGGCACCATCTAGTGGTAGTTGAGCATACTGGTAAATGACTACCCAAGAAAATAACA
RM20090700175_76CT	GAAAACACCAGCACCACTTCACCACAGCATACACACAACGTGGCCAGTTAGACCATGACATTGGAGAGAGGGTGC[C/T]TGACA
RM20090700176_74AG	ATCACTGCAGACAAACTGCCAAGTACTCCGGGCTCCCCGCCAGCTGCCACGCACACGCACACAAACAAACGTG[A/G]CTTACTT
RM20090700177_50AC	CGGTTTATTCTCATCAGAAGCAATGTGCAGTGATGAGCCCGGCCGTGCG[A/C]GCTGAGGAGAATCGTGGGAGGTAAGAAATGA
RM20090700178_72CT	TCATCAGTCTATCCAGCCATGACTCCAGATTCCAGGCGGAGTACACTCTCTATGGTATACAGTGATGCAAA[C/T]CACTTTTTA
RM20090700179_70CT	GCTGGGCTTTCAAAGACCGCTCTTCGCCAGCTTTCAAACTCTGCCAGGCTCAGGAAACAGGAAATGTCA[C/T]GCACAGATTTC
RM20090700180_71CT	AGAGTGTGTGTGTTGTATGGAGACCTCCATAGAGGAGGACTATAGCTGTTTGATATAATCCTGCATGGCA[C/T]GCTGAAACGC
RM20090700181_9CT	TGGGTCTC[C/T]GCCTGGGTGTGGCTGCTGGGTGGTTTCCAGAAGGTTCCTCTTCACAGCTGAAGCCTCTTCACCCCGCTGCAC
RM20090700182_37AT	CCTGATGAAGGAACAGTCATTCAACACGACACAGGA[A/T]GACTCACATTGACACACCATTGGCAAGGCACTCTAGCCAATCTA
RM20090700183_33CT	GCAAATCAACTCTCACACATTCTGAACTAACC[C/T]CACACAGCACAGTTTCTCCTTGACTATACAGAGGGCGGGGGAGTGAGA
RM20090700185_66CT	ATTGCTACTCAGGTCCAACTCTCTCAGGTGTGAGGAGTTCGAGCTGAGAGCTGAAGCCAATGCAT[C/T]ACAACATCTCTCTGT
RM20090700187_5CT	GTCC[C/T]TACACTCTAACCACCTGCCGTCCCAACAGGGACCACTATTCTACCTGCCGTCCCTACACTCTAACCACTAGGCTAC
RM20090700188_56AG	TACCGAGCCTTCATGAATGACAACACCATGCACCGGTCAGTCCGCTACCCGCCCA[A/G]CTGCCTTCTCATTCAGCCCATGTGA
RM20090700189_63GT	TGATTTTGGGATGTACCGATCCTGTTCAGGTGTTGTTACACATCGTCTGCCACTGTGAGGAC[G/T]ATCAGCTGTCCATCCTGT
RM20090700190_20CT	TCCTGTGAGGTTTTATTAA[C/T]GTTCTGAGAACAGAAATTAGGTTATTTTTAAGGTTCCTTAAAACTTTCACTGAACGTCTCA
RM20090700191_21CT	CATCCTGACCCCCCACGATC[C/T]TAGTGTTAAGAGGAGGGGTTCCGCACACTAACAGCGAAAGAGAATGTTGGGTTATTTGGA
RM20090700192_65CT	TTAAGTAAAGCATTACAGACCTTTCTATAGAAGCAGGACAGGCAGCCTAGCCTGTGACACACAG[C/T]TTGTGTCCCCCTATTT
RM20090700193_71AG	TCTAAACCCAGTTCACAGCTGTTGCGTACAATTTGAATATTTGTAACACGGTCACAACTTTGATGCTCTC[A/G]AACTTGTTGT
RM20090700194_9AT	GACTCTGG[A/T]CGTCAGTTGAAAAGTGTAGTACATTTAAAAAATAATAATTATGACAATAATTTGCAAAAATTTATAAAAACA
RM20090700195_50AG	GGATGCGTCTGACGTGCTGGTAGAGAGGCTGGATGGTTCTATAGCTGCT[A/G]TGATCTGTGATGGAGAAGACCAGGACGTATC
RM20090700197_1AG	[A/G]TGGACACACGAGTCCTGCTTCATACTCCAGATCTGGTAGAGATGGAGGGGAGAGGAGAGAGAGAAAGAGACGTGAGGACT
RM20090700198_2CT	G[C/T]CTACTGGTGCAGTAGCAGCTTGTGATCCAATTCCCGAGAGGAGGAAGCAGCAGAAGCAGTGAGACACATTTAGGTCTGT
RM20090700199_19AG	ATCTCCACACGCCCCAAC[A/G]CCAAGTAAGACATCACACACACCTGCTTCCCTGTCTGTCTGGCTGGTTGACTGGCTGGTTGG
RM20090700200_67AG	TGACATCATTAATCCTACCTGTTAGTTAATGTGTGCTGTGTAATGCCAGGGGACTCAACAGTATCC[A/G]CCACAGCTGACACA
RM20090700201_53AG	ATCCACCAGTGAGAGCACACACACACATCACATCTCTGACCCGCAGCCCTCA[A/G]TACACTTACATGTATTAACAACCCAGAC
RM20090700202_72CT	ATAGGAGTACAGCTGTCCCGATATAAGGGGATGCTTCCCCACAATCAGCCTCCAGGAAAAAAATATTCCAG[C/T]GAGACTGGG
RM20090700205_73CT	TGTGTTCGGATGTACTTATCCTGTGCAGGTGTTGTTACACGTGGTCTGCCACTGCGAGGATGATCAGCTGTC[C/T]GTCCTGTC
RM20090700206_19CT	AGGTGTGACTGTGTTTCC[C/T]GTGTGTCTCCAGCAGGGGGAGCAGATGAAACACTCTCACAGTCGTAACCTGGAGGTAGAGGC
RM20090700207_67AG	GGCGTACAGTATGTGGTACGGGTGGTGTGAGTACATACCTGTGATTCAACAAATTAAGGCCTTGAC[A/G]ATTCATTGATTAGT
RM20090700208_12CT	GCCCCGGGGAT[C/T]GTCAACAAAGACATTTGCAAATGTCATCAGCGACCTCTCAGCTCCTCTCGGTTCTAACCCCAAAGAACG
RM20090700209_68CT	CCGTGTGTTTGTGGGTTTACAGAGTGTGTGTTTGTACAGGTGCGAGCAGCTCTCTCCATTGTCTTTA[C/T]GTGCTTGTGTTGG
RM20090700210_68GT	ATGTCAAATAGCATAGCAGAGAGATGACAGGGCGACATTGCTGAGAGTTTGTTCAGCGCAGGCCGTC[G/T]ACTAGTCCAACCA
RM20090700211_13CT	CGACACAAAACG[C/T]AGAAATATGTAGATAGAGGCGCGTGACCAGAAAGCTAGCTAACAGTACACTTCAAGTCACCCTCGTTC
RM20090700213_39CG	ACCATCAGACACGTCCAACAGCGGGTGGAAGAGCAGGA[C/G]AACCACCGGTTGGACAACAACTGCATATTCCAACACACCGTC
RM20090700214_67AG	TCCTCTCTCCTCCTCGTTCACCAGGATTCCAACTTCCTCCACTCAGGGAGTACTGAGATAGATCAG[A/G]ACATTCGCAAGAAG
RM20090700215_7GT	CTTCCA[G/T]AAAGGATACCTCCCCCACAGAGAATGAGCACACAGAAAAAATTGAGGTGACCCCCCTCTGATACGACTGCTCTC
RM20090700216_75CG	CAATAGGTCCCAGTTGATCCAGGGGGTGTCTGCCACTCCATGGAAATGGCCCACATATGGTAATACAACTCTCT[C/G]TGTGTG
RM20090700217_10GT	GTCGGGTCC[G/T]CTCCTCTCCCCAGGGATGAAGGGTACAGGCACTCCTCCTCCCTTGGAGAAGCAGCAGCAGCAGCAACAGCA
RM20090700218_37AG	TGTGCAGGCAGAAAAGGTAATCTTGGGTTTAAAGGA[A/G]ACATGGTAAGTGAATAGATCTCTGGTGAAATAATTGTTTGGAAC
RM20090700219_8AG	TCTCCAC[A/G]GAGTCCCCTACTGTCTTGTGGAACGGCGAGTATGAAGAAACACCCACACCTGAAACACAAACATGTACATTAG
RM20090700220_60AG	CCTGCACGTCATCTCTAGCTGACACCTTTGCTAACAGGTGTTGTGTCAATACAAAATGT[A/G]TCCATTTAAAGAAACGCTGCC
RM20090700221_35GT	TGAAATATGCTACTCTCTCATTGTTTACTGTTGT[G/T]CTATCATAAGATAATAGCATATTATGCTTTTGCCGAAAACCCTTTT
RM20090700222_1AG	[A/G]GAAATGTCAGTGTTCTGCCATTGCCAGCGAAGAGCCCGGATCTCAATCCCATTGAGTACATCTGGGACCTGTTGTATCAG
RM20090700223_64CT	GTTTGAAAACAATATTTCAATATTAAAGTCATGCAATCCAAATAATAACAATAGTAGGTACCA[C/T]GATGCAACCCGTTAAGC
RM20090700225_27GT	TTCCGTGGTTCCTCTCATTCTTATTT[G/T]CAGAGATAAAGATGGTTCCAACTTCTTATCCTCAACCGCACATGGCCTTCCTGA
RM20090700227_4CT	TGA[C/T]ACACTAGGGGCCATTTTAGATTTTTGGTACTGCAGAACTGTAGGGACATTACCTATGCATTATCGACACAGGTTTTT
RM20090700228_25CT	TGAAAAAGTCTCAGCTAAAGCAAC[C/T]GAAGTCCCTAACCATTGAGATTCATGATGATGTGCTGTGTTACTGTTTTTATTGAA
RM20090700229_19AG	TGCAAATAGACAAATGAG[A/G]AGGACTGGAATACATTATTAGAGCTCATCAATTATCTTTATACCAGAGCTGGAGTGATGGCT
RM20090700230_50CG	CTGTTTTTTTCTTTGTTGGAAAGAGGGATGGGGGAGTATGTCCCTGTAT[C/G]GATTACTGGGGTTTGAATAACATTACCATCA
RM20090700233_45CT	GGTCTGGCTGCCGTAGAGTAGCACACTGAGGTCCTCTGTTGGCC[C/T]GTGGGATGCCTCGCTGCAGCTGCCGCTCCTTTCATC
RM20090700234_54AG	AAAATATCAGTCTGTGCCTGTTGTTGCTGAATTCATTAATGTAATGGACTAAT[A/G]AGGAATACAAAAGCAGAGGGAATATTC
RM20090700235_16AG	GTGAGGGTCATCATG[A/G]TCAGACAGCTGTGTTAATCCTCACTGTTCCAGACTGATCTGTCACAGCCTCCACCCTGAGAGACC
RM20090700236_31AG	TCACATGTGTTGGGACCTTGGGTAAACAGA[A/G]CCGAGTGAATCACTGATCTCCAACACTGCAGGGAGCCGCCAGGGGTCTGT
RM20090700237_67AG	GGGGAAGAAGGCGAGTAGGGAGTCCATCCAGCTGCGGACGCTCACCGTGGGGTTGTGCATGTGCAC[A/G]TTGAGCAGCAGCGG
RM20090700238_73CT	GATGTGTGTGAGCCGCAGCCCCACATGAAAGAGCGGCCATTAAAAATGATCAAAGAAATTACAGCACTCTGC[C/T]GCACAACA
RM20090700239_68GT	CGTCCTGATATGACCCTCCAGAAAGACAATGCCACCAGCCCTACTGCTTGTTCTGTGCGTGATTTCC[G/T]TGCAAAACAGGAA
RM20090700240_72CT	AGTGTCTTCCTGCTCAGTCAGAAAGTGAGGATAACTAGCCCTTTACATAAAACTAAGATCGAAAAACTGCC[C/T]GTTCATAAT
RM20090700241_68CT	TGTCTAAGCCTCTTACAGATAATCAGCACAGATCACAACATCTGAAGCTTAGAGAGACTATTGTTGT[C/T]TGGTCGTAGTGGA
RM20090700242_7AG	AGTAAC[A/G]CTACCTGTCTCCTACCACTTCAGTATTTGCAGATTTTAATGGATTGAATAGGTCCCCCTATCCAGTCCTATTAG
RM20090700243_16AG	GTAGCCTGTCACTAA[A/G]AGTTACCCTGCTGGGTGTAGCCTGTCACTATGAGTTTTGATTCAGCCACGTTCCGGCAGATATGA
RM20090700244_44CT	AAGTCAGGAAACATGCATGGGAGAAAACCTAGCCCACCTTCCA[C/T]AAAGCTCAGCAGAGCACTACAGGACTCCTAAACTGTA
RM20090700245_49CT	GACCCTGGAGCAGAAGGAGTTGTGTCGGAGCAGACTGAAGCTGCTGTG[C/T]TACCTGGACCGCCTGGCCACCTACGAGGTAAG
RM20090700246_25AG	GAACCGCCCCTGCAATGCAGAGGA[A/G]GAGCCGTGAAATCATGATATGGGCAGTCCCGCGGGACACAGTTGGTAGAGCATGGT
RM20090700247_14CT	AGGCAACAACAAC[C/T]GCCTGAGTTACATCAGGAACGTGCAATTCCTCCATCAGTGCTCAGACTGTCCGCAATAGGCTGAGAG
RM20090700248_25AG	TGAGCTCAGTGTGTCCAAGGCCAG[A/G]AATTACGTTTGGGTTGTAGAAAAGTTGGGCTTTAGCGATTTGGACAAGTGCTTTTA
RM20090700249_17GT	ATGACTATGGGCCATT[G/T]GGCACAGACTGAAACAATGACTAGCTTTAAAGGGAGCAGATAAGCATCAAGTAGGTCATTTGAA
RM20090700250_52CT	TCCTATAGATGTGTACTCCAGGGGGCTAAATCCTCCACCCTGGCACCTCTC[C/T]ATCCATCCCCATATTTGTGATATATGAAT
RM20090700251_44CT	TAAAATCTAGTTATCTATGGATGAGAGATACCCAAGGTTGTAA[C/T]GTAAGGGCTATTCTGCCACCTCTCTACCATTTTTCAT
RM20090700252_63AG	TAAAGACACATGCACATACAAAATATCATGCCATAAGCCTCACTATCTGCCAATAATGAAAA[A/G]GTTACAATATTTAGACAA
RM20090700253_75CT	GGCCAGGGTGTGGGCTTACAGGCAGTTGGTCAGAGCTCCTTGGGGTTGCAGTCTTCCCTGGGGCCTTACGGCTC[C/T]GAGCCC
RM20090700254_35AT	CCTAGTCTAACTTTCAGGTGGCTAAACCCCCCTA[A/T]CCATTCATTTGTATTCACCTTACGACTCTAGTCTTCCCAAGATGTC
RM20090700255_16AC	TTAACAAAGCAAGAC[A/C]TCTTGAAACATCACGGAAGATAAAGGACTTATATAGTATCAACGTGTAAAATAGCTGCTCCATAG
RM20090700257_42AC	CGACACAAAACCGGGAAATAAAAACATAATTCATGCCTTAC[A/C]TTTGACGACCTTCTTCTGTTGGCACTCCAATATGTCCCA
RM20090700258_34AG	GCAGTAGTCTTTCATGATTCGCTGAGTTTTCTG[A/G]CTGACAGCACTGTTCCAGTAATGCGTTGTTAGGCCTAGCGTCCAGTT
RM20090700260_28CT	TTAAGTAAAGTGTTACTGAAAGGTTGA[C/T]GACTTAATGGATTTAGATAGCCTAGAAAGACTGCGGTGGTGCCCAGGCTGAGG
RM20090700261_80CT	AAGTGAGTACAAGGGAGGGTAGAGGGGGTACACGACGATGTCATATCCAGCTCCGTTACATATCCAGCTTTCCTAAATT[C/T]A
RM20090700262_42CT	CGCACACACCTCACCCAATGAAAAATAATATGACGAATGAG[C/T]GACAGAATGTGGGAGGGGCTTAGGTTTGTATCTATCCTA
RM20090700265_69CG	ACTGTGCACTGGAGAAAATCCACCATCTTCTGAGCATGCTGCTTGGTGGCATAGTAGAAATCAATACC[C/G]TCTGAGGAGAAA
RM20090700266_72CG	ACAAACACATGTCTCTGGTTTCCTGCTTCATTCAGACTGTTAATTGTTCTAATAGGCTCGTGTGTGTGTGT[C/G]TGTTTAATA
RM20090700267_19AC	GCAACACACAGGAAATGG[A/C]TGCTGTCACCCACAATGTTTTCAAATCAAATTGTAATGGTCACATAAGCATTTCACTACAAC
RM20090700268_68CG	TATTCAATATCCCATGATCCAGACTTACTATCCCATAATAATGACTTACTATCTCATTTCTCCGAGT[C/G]AGAATTTGGAGGG
RM20090700269_11AC	TCATGGCCCA[A/C]ATTTCTCTCAGTTGCTAGATGCAGTTGAAGCCAAATGGTTTTGACTGGCAAGAGTTGAACATATTGAGGC
RM20090700270_75CG	GTGGCGTTGGAGGCCCACTCAGGGACTTTGGGCCAGACGTCGACCTCGGCTCCGAACTGAAGCAGCTCCCTGAG[C/G]ACCTCC
RM20090700271_53CT	GATGAGTTAGTTAGTTAGTGCATGGTGTGACTGACTGACCCCCTCCTGTCCC[C/T]TGCTCCTCCTCCTCTTCTTCTACCGCCT
RM20090700272_29GT	TGGAGTAGACTACAGCAGCACAGCTGGT[G/T]TGATATGCTCAGAATTTGTGGATCATGGGTCATGTCTAGGTTTAGGGCAAAC
RM20090700273_59AG	CTTTATCTTGTTCTGGGATGTGAATGTTTGGCTGGTAGCCCTTACCACACGACTCCCT[A/G]GGTCAGCCCACAGAGACATGAC
RM20090700274_81AT	GTGGTAGTGACTGCCACATAACACAAATATGGTGACCAGCGCTCTTGCTCTGAAATGCTCATACATTTTCTCTCTCTCAC[A/T]
RM20090700275_65AC	GCTTAAGCCTATACCCATGTTAAACCCAGTCCGAAAACTTCCTCTGATACAAGGAGTAACAGAC[A/C]GTGAAAATAGATTAGT
RM20090700276_7AG	CTGGCC[A/G]TTCATTGTAATATGTAATGTTTACAACCTTACCTGCAGATATAGCCTACCAACACAGACAACCTCTAACCCCAA
RM20090700277_6CT	ATCTT[C/T]GTGTCCTCACCCTCCCTCGTCTACATGGGCCACGCGCTCTACCGCCTGCGCGCCCTGGAGAAGGAGAGGCACCGG
RM20090700278_1AG	[A/G]GTAGCGGAGGCCACCGAGGTGAATCTGAACATGCGTGTGGGTCTCCACACGGGCCGGGTGCTGTGTGGGGTCCTGGGACT
RM20090700279_45CT	GTTTATTCAGAATTTACAACATCATTCCCAACTAAACTCTGCTG[C/T]TTACCTGATAAATCACACAGCAGGCTAGTTATATCC
RM20090700280_77AG	GGGTACCACATGAGGGAGGAGAATATCTTCGCTGTAAAGCACAGCATTGAGATTGCCTGCCATGACAATAAGCTCA[A/G]TCCG
RM20090700281_51CT	GTGGTTAGTTGCACAATTTGGATAGGGATCATAACAAGGCAGAAATTCTC[C/T]AAAAACAATACCACACACAAACAACGGTCT
RM20090700284_44CT	CTTCCTGTAAGTACAACTGTGGTGACAAATTTGGAAGTTGTTC[C/T]TGTCAATACTATGGAAACTGTTGCCATGACTACAGCA
RM20090700286_31AT	TTATTGACTGAAGTCCGTCTCCCCTAACAT[A/T]TGCCTTGTTTGCAACCCAGCCCTCGTCAACAATTCTGCTGGCGCCCCCCC
RM20090700287_35AT	CTAGAGAGGGGACTGTAATGTGCCGCCTGGGTTC[A/T]ATGCTGCCTGGAGAAAGGGGCACTGTGTCCTTCCTAGGGTGGGGAG
RM20090700289_77CT	GGTTATTAGAGCTAAATTATGTTTTAAATAAGTCAGACTTTTATAGGCAATTTGTGTCTGTTGTGTCTGAGTGTAC[C/T]ACAC
RM20090700290_37AG	GACAAAGAGAGGGTGAGTTCAAAGTTGAAACCAAAC[A/G]TCTCAGCGAACAATGTTCCATGTTGATAAATGTGCATTTTGCAT
RM20090700291_68AC	CATTTGGTATGCCAAATACTGGTTCGTCAACTAGGGTCAAATAACCTGTGGCACTTGAGAGCATTTT[A/C]ATTTTTCACTGTT
RM20090700292_58AG	TCTGAGCTGCTGGAGGCTGGTTTCCCTGCACACAGAGGCAGAGCATTATCTATGCAC[A/G]AGAGAAGGCTAGAGAAGGAATAC
RM20090700293_49AG	CGACCAAAACGCAGAAATAAAACATATAATTAATGCCTTACCTTTGAC[A/G]AGCTTCTTTTGTTGGCACTCCAATATGTCCCA
RM20090700295_45CT	CCACACAAAACGCAGAAATAAAATATAAATCATGCCTTACCTTT[C/T]GACGACCTTTTACCTTTTTGTTGGCACTCCAATATG
RM20090700297_81AT	GTTCTACTGCAGAAGTAGTCAGAGCGCATTAGACAGAAACAATTGATCAAAACATACTAATTAATCTATGTGTTTTACAT[A/T]
RM20090700298_7AG	TGTGGT[A/G]CAATCAAGGGGATGGCAATTATACAACTTCCACCTGTATTTTATTTGTGTATTGTATTTCACAGTATTGCATTG
RM20090700299_33AT	GAGCAGCGTGGACTCCACGTCCGCTGCTGTGA[A/T]GGCCGACACCTCCCTCTCCAGGGACTTCTCCTCCCCCCTTCCGCCTTC
RM20090700300_70CT	CTTTTTCACCGCAGCCAACATGAGTAAAACATTTCAATGTGTGAACCCTCGCAAAGCTGCCGGCCCTGA[C/T]GGCATCCCTAG
RM20090700301_1AG	[A/G]AAGGGAAGCCATACAACAGAGTCTTTCTTAGTGTACAGACAGAGACCCCGACACTGAGCTACTGCCAAAGACATAAATGC
RM20090700302_12AG	AACCCTTCAAA[A/G]GAACAGACACTGTTTCTGTTTTGATACTTAATCTCATCCTACCTTCCTGTAGGGTCTGTATACTATTGG
RM20090700303_36AG	CACTGTTTTCTATACTGAGTATTGACAACCCAGAC[A/G]GTCTTTCCTGATACATTGTGCATTATATGTCCATTGCACTGCACA
RM20090700304_52CG	TGTCTGGAGGTTTTTCAGCACCTGGATCTTTAGGTTGACAGAGCTCTTCCT[C/G]TCCGACAGGATGCCATTGTACAGACTCAT
RM20090700305_59AC	GCAGTCTTTGTAAGTTTTGAAATATACAATTTACTAGACTGTAGCACTTCAAAACAGC[A/C]TGCAGTGAAGTGTTGCTCCAAT
RM20090700306_28AG	GGGAGAGAAGGGTAAAGGGGTGGGTCT[A/G]TTGGGTTCCACCACATCACCTGTGAGCTGTACATCTGGGGGTATCAATAACCC
RM20090700307_52AG	ACATTTCTATGCAATTTTCTGGTGGACACAGAACTTGAACATAGAAACAGC[A/G]GTTTCAAACACACCAAACAGCGGTTTCAA
RM20090700309_57CT	AGATTTACCGACCTAACCCATTTCTGAACGCAGAGCCCCTTATCAGGCATCAATCT[C/T]CCAGAGCACTGGGACAAACAAATT
RM20090700310_1AT	[A/T]TGAAGCCAGGAAGTTTAACATTGTTAGCAACTTGTTCACTCAGGAAACGGTTTAACCAGTTTGAATTGAAAAATAAATAG
RM20090700311_74AT	AAACTGAATTATGTTTTTCCAAAAGTGTGCTCTATAAACAAAATCAAGGTTTTAATTTGAGATTTCCTGGCCA[A/T]CCTCACG
RM20090700312_35CG	AGCAGGAGCGGACAGCTCTTCAGCGACAGGAGCA[C/G]CAGGGTCCTGTGAAGGAGAGAAGGACACCGGGCCTTCTTGCTCTTC
RM20090700313_11CT	TGACGTAGAA[C/T]GGTGATAAAACCGCTCTCACTGCTCTGGAAGTTAATATGAATACGAATTTTAGATCGCAAAAACGTCTAT
RM20090700314_31CT	ACACTACTACAGGCCACACTACTACTATCT[C/T]ACTTCTCTGAATACAATCTTACCTGTCTAAACTTCCACTCTTGCTCATGC
RM20090700315_32GT	GAACTGCCCCTGCACTGCAGAGGAGTGGCCA[G/T]GACAATATGAACTCAGTGTCAGTTCTGTTCCTGTGTACATCAGCGTCAA
RM20090700316_64CT	GTGGATGAAGTAGCACAGCACCAGTCTGTTGAGCTCAGGCAGGCACTGGACAACATTGACAGC[C/T]GCCACAGGGTCATCATA
RM20090700317_21CG	TAGCTGTGATGTGGCTTAAA[C/G]CTACAAGCCACATTACCCCCAAATGCAAACAGAATAACATGTTTTGCTTTTATTGTGTCT
RM20090700318_48AG	TTCAGTTTCAGACTAGGACTCCTTGTGGATGACTTCAAGGAGCATCT[A/G]CCTTTGTATTTTGGTGTTTGAAGGCTAAGAAAA
RM20090700320_24CT	CCAGGAATGGTATCTGGTGCCCT[C/T]CAACCTGCTTTCAGGATATGTAAACTGCATTCTGTGTCTGCATGTGTGTCTGCTGCC
RM20090700322_36CT	TGAAATATGTTTTCTGTCTTTTGTTTAAAACCTGT[C/T]ATGGATGATGCGAATTTTCGCAGCTTTTTGTAAAAAATCGCGCAA
RM20090700323_80AG	TATTTAACTACCAGGAGTTGTCTACTACCACTATGACTTGACTTGTAACGGTCTATTACTCTGCATTACCTGCCAGTTA[A/G]C
RM20090700324_77AC	GTGGTGAGGACTAATAACACATACTGGAGCATTAACATACCTCACGTCCCCCTACCCAGAGCCCACCACAGTAGAG[A/C]TATG
RM20090700325_5GT	GATA[G/T]AACCATAGTGAGAAGGGAGGGGTATGATGGCTAATGGCTACAGGAAGTATCTCTGCTGGGTTCACACAGGCCAGTC
RM20090700326_63GT	CCAGCTAAGGTCCCGTGGCCTCCTGGGTAAGGCGGCGATGGGCCAGTCCTTCCGAATCCCAG[G/T]GAACTATTGCTGCTGCAG
RM20090700327_45AG	GAGTACCACATGAGGGGGAGGATGTCTTCCCTGTAATGCACAGC[A/G]TTGAGATTGCAACAAGCTCAGTCCGATGATGCTGTG
RM20090700328_15AC	AGAGAGAATGGGAC[A/C]TGTAAGTTAATCCTCAACACATCAAAGGCTACATACAGTATGCTGTCCAAATCCCTTCCAATAGAT
RM20090700329_30AG	ATCCAACATCCTGCTTATGGGGTCGATAC[A/G]ACCCCTGAAGTCATTCACCAGTTCACTTTGTGACCACTGACAACAATGGGG
RM20090700330_76AT	ACACGCACACAAGGCCCTGCGGTACGGATGCAGTGATGTCAAATTGCGAGATCTTGTTAGATTTCTCAATTTACG[A/T]GATCT
RM20090700331_15AG	TGAGTGGTTGCGCC[A/G]CTGAGCATGCTGGGCCGCGATTTAAAAGGAGATCACAGGGCCATACCTCAGAGCAGCTCAAGCCCC
RM20090700332_67AC	GATGCCAATAGCGATGTGATAGAACTTGCCATCAGCTTTTTTGTCCCACGCAGCATTCAATCTGAT[A/C]ACTCTTTGTTGGCT
RM20090700333_14AG	TGGGAAAAGCCTC[A/G]GACCTCTCCGCCATTCTCGGGGTGTTGTACCATAGGTACTGTCTCCAAGCTCTGGGATCAGCTGTAC
RM20090700334_47AG	GTCCTGTTGAGACTGGTTATGGCCAAAGGGCTGGAGGGGAAGACAA[A/G]GAAAGAGAAAAAAGGCTAAAGTTAGCAACACAAA
RM20090700335_81CT	GACGACCCCCACACGACCCGGATGGAGTTTCAACCCTCCCACTACCAGTGCTTCGAGAACTGTGGCTCACTCAAACTGAC[C/T]
RM20090700338_47CT	AGGTCTGCTCCTTATCACTCCCCTGTTCTGATTGGCTCTTATCATC[C/T]CTATGAGCTCTGATTGGCCCTTATCTGCTAGCCT
RM20090700339_30CT	CTGGAGTTCGACATCAACATCCCCGTCCC[C/T]TACCGCTTCCTCAGGCGATATGCCAAGGTACAGGGTTTTTCCTGCGTCAAA
RM20090700340_54AG	GTGAACAGAGAGCTGACCAGCCAGCAGGAAGCCACAGCTGAGCAGCAGCAGCA[A/G]CCTCCAGCTGAGATGTTTGACTTCAAG
RM20090700341_67CT	GATCTTCGTTGCCTCGTCTCAACCACCAAACCAACCACCTGGAGCCAGCAACTCGTATGGGTGGAA[C/T]ACACCTGCAATACC
RM20090700342_71AC	TTTCAGTCAGTACAACGCCCATAAACCCAACTGAAAGATGGCACTCCCTAAATGCATCTCAGAAAAGGTT[A/C]TAGAAATCAT
RM20090700343_55AC	GTGGAGGAGGAAGCGAGGGGAGTGATTCAGCACTTTAGCAGTGAACTGAACACA[A/C]ATTTACTGTACCTTACGCACAATCTA
RM20090700344_44AT	AGAAGCCAAAAGTTAAACATGAAAAATTGCTGACAATCACAAC[A/T]AAATTTATTAGGCCTAGAGAATAAACGCAAATGTACA
RM20090700345_43AG	GAACCCAGTGTAGAGGTCTACTTCCAGTCTGATAGAGCAGCC[A/G]GCATGAAAGACCTGCTCAGGGAGTTCATCAGCAAGGCC
RM20090700346_14CG	CCCTGGGATACAT[C/G]TCTTTATGGGCCACGGCACGCCTTTAATAGTGACATTTAACATCTTAACACCCCTCATTTATTTTTC
RM20090700347_63CT	CTGAATTACTGAGAGGCAAGAGAACAACTGGGGGTAAAGCCTTGGACTTGTTCCCCAAAAGG[C/T]GATGCAGAAGGTTGCTCG
RM20090700348_27AG	TACAAACACCCATACCTTATATCAAA[A/G]AGCATATGTATATTTTCTGGAGAAAATCTTCAGTAATAGCTATTTAATTAAGTC
RM20090700349_31AT	ATAGACGTTTTGGTTTACTCATAACATGAT[A/T]CAACAGGAAATAGAGGAATCCAAGAGAACGACTTCAACCAAAAGCATGTT
RM20090700350_41CG	AGCTTCTGTAGTGAGGTAGAGGGATTAGATGCTGGACAGA[C/G]TTGGTTAACTATAATCCTGGAGATGGAGTTGGAGAATGCG
RM20090700351_60AG	ACCGATTTGGGAACCCTGATCTAAAGAGACATGTCTCCTGAAGCAGGGAGGCCACTGGA[A/G]ATGAAATACACCCAAATATTA
RM20090700352_60AG	GTCCCCAATGGACACGACCTCGCACCCACAGGTAGGAGCCAAAGTAAGCCTCTGACTAA[A/G]ACCAAATCCTACAGAACACAG
RM20090700353_17CT	TCGGCATTAAGAGTTG[C/T]CCTATGGCCCAGGGCAAGTGACCTGAGCAGTCATGCAAATTCAGAATGCTCGGAGCTTAACACA
RM20090700354_80GT	GCATCTTGTAGTAGTAGAAAAACACTTCTTAGTTTTCATGGACCACTTAAAGGGGAAATCAGCAACTCAAACATAATAT[G/T]T
RM20090700355_52AG	GGGTACCACATGAGGGAGGAGGATGTACGCACTGCGTTGAGATTGCCTGCA[A/G]TGACAACAAGCTCAGTCAGATGATGCTGT
RM20090700356_3AT	AA[A/T]GTACTACTGTCCTGACTTTGCTCAAGGACACATCCAACTTGATGTACATAGCCACACATCTCTGTCTCTCTCTCTCTG
RM20090700357_55AG	CCTCTCCAAGTCTTGGTTCTTCTTGTGCATCTGCAGATAGTTGAGCTGAAGCTG[A/G]TTCTGGTACTTGATGACTCTGTCCTT
RM20090700358_60CG	CGTATTCAATTCAGCACCCTTTGTTAAATCCCTTCCCATGATGCTTCAGCTTCAATTGT[C/G]CACAGAAAACAAGGTGCCTTA
RM20090700359_45AC	TTGATTTAACCCCCCAAGATTTCTGCAAAATGTTTGTAATCAAT[A/C]ATTTTCTTTTGTTTTCTTTTTTCTTGTTGGACATAA
RM20090700360_59CT	TGAGCAGTGACAGTGGCCTGGGTGGCAGTACAGACGGCAGCACAGACATCCTAGTGTT[C/T]GGCTCAGTGGTGGACAGTGTCA
RM20090700361_28CG	CTGAGCCAGAGTGGTACAGTCTTTATA[C/G]TCCCTGAGTCAAGTAGACAACAGACAGGCTCTTAGCTTTCCAACAGACAACAG
RM20090700362_1AC	[A/C]TAATTTTGTTTTATCTTGATTATTGTCCAGCTATGTGGTCAAGTGCTGTTAAAAACAACCTAGTTAAGCCCAAAACAGAG
RM20090700363_43AG	CTCAGCTGCAGCCAGGGTGTCCTGGTTGTCCGTACCCAGGCA[A/G]ATGACCTCCGGGTCGGTCACAGGCGTCTCAGACGTGCC
RM20090700364_10CT	AAGTCTTTG[C/T]GATGGAGCTTTCTCTTCAACTGGAATATTAATGTCTCTTGTCGATTGTTGCCTTTCAACTGACCCACTTTA
RM20090700365_55CT	CTCTACAACTCTGAGCAGCTGCTCATCTTCCCCCAGGACAGGTGGGCCTTTATG[C/T]ACTGAGGAGCTGTCTCTATCCACTGC
RM20090700366_21GT	AGAAGAGATGAGAGGAGTGT[G/T]GGAGCTCTCCTCTCTGTGCTATCTCTGTCTGGATGGGAAGAATTTAAAGAGCTGGCAGTT
RM20090700367_15CT	TCCTCCTCGTTTCA[C/T]TGGAACGGCAGTGTCTTAGCATCTTTAACGACTATGAATGTTACAGAATAAACTAAAACAGCAGGG
RM20090700368_59AG	TGAGCCTGGCTGCAGTGAGGACGTGTGTGGTGCATGCTGGGATCTTCCTGCTGTGGGC[A/G]GTAGTACTGCCATTACTAAGCT
RM20090700369_2AG	G[A/G]GATCAGAGCACAGGCTATCTTTTAGCAACTGGAAGGCGTCTTCCGTCTCGTCCTTCCACGCTACTTGGTTTGTCAGGTT
RM20090700370_70AG	AATGCATGAACCAGAGGTGCTGTGGGCCAAGTAGTATGTGTCCACTGGTGTCACTGTAGAGAAGCCAAT[A/G]CCAGCCATGCT
RM20090700371_13AG	CTGAGGAGATGT[A/G]TTGATTACTTTACATATCGCCCTCTTTCACGTAGATGGAACATGACCTTTCTGAAAGGTCACTGTCAT
RM20090700372_52AT	GGGTACCACATGAGGGAGGACGATGTGTTCCCTGTCACGCAGTGTTGGGAT[A/T]TCCTGCAATGACAACAAGCTCAGTCCAAT
RM20090700373_17AG	GTGGAGTCACGACCAA[A/G]GTCACCATTGTACAGCGCCCTGGATCAATTAAGGTAACGTGCCCTACTCAGCTCCGGTATTCGA
RM20090700374_30AC	GAGAACCACATAAGGGAGGAGGATGTCTT[A/C]CCTGTAATGCACAGCTTTGAGATTGCCTGCAATGACAACAAGCTCAATCCG
RM20090700375_23AG	GGCTAAATGAGCAGACCTCAAC[A/G]GGATCAGTGGGTTGTGGAAGATGTGCTCCTCCTATACCCACGGTCCAGGCACCACACC
RM20090700376_11AC	GATTACAGTG[A/C]ATCCCATCCGCTCGAACGGGCACACATTTTCCCCACTGTCACAACCGCTACCTGTGCATGTCTTGAAAGG
RM20090700377_70AG	GCTGTTGGCTTTGCGTTCCTCTGCGATGGGGGGGAAGGCCTGGAAGGTGGAGATGTACAGATCTTTCCG[A/G]AAAGACAGGCC
RM20090700378_26GT	AACAGAGATAGAGTCTCAGACGTTT[G/T]CCGGACTGCGTTCCCTCCGCTCTCTGGACCTGAGCTCCAACCAGCTGACTGTCAT
RM20090700379_12AG	AGGAATGTCTA[A/G]GACCTGTTGGATTGGAGGGTGAGAGCTAGGGCCATTCTCCCCAGAAATGTCTGGGAACTTGCAGGTACC
RM20090700381_67CT	AGCAAGACAAAATTCGGTATTCCAGCAATCAGGCTTACAAGCTACCATCGTCATACTTCTTTTGAT[C/T]ATAAATGGTAAAAA
RM20090700382_44CG	TGCTATTTTACCAGTAAAATGTATGATACCCATATCATTATTA[C/G]TTAGCTATCTAGGTAACGAGCTACATAGCTAGATATC
RM20090700384_80CG	AAGTCAATCAAGACTGAGAACTCAATAGTAAGACTGGATGTGACATTTTATTGTGTCATAACAGCTGCCTTTAACAAAG[C/G]A
RM20090700385_9AG	CATGAAAG[A/G]AAACACATCCCCGGGTGAAATGGCCTATGTCCCTTGTGGAATGTTTCACCAACCACCACCAGTGTTTCGTCC
RM20090700388_67CG	GTTGGCTGGAAGCTAACAGAGGAGACTGGGAAGCCATCTTGGATTCCCAGACCCAGACGTGTGCAG[C/G]CAAGAGCCCGGGGG
RM20090700389_38CT	TATCACTGTATCCTGAGGAGAGAAAGGGACAATAAAG[C/T]AGCTAGACTCCGGTTGAGTCCCAAATGGTACACTATTCCCTAT
RM20090700390_54CT	AACAGTTGCCCAACACCCACTCACCCCTCCTTTCTCAGAGTGAACCGTGTTTT[C/T]GCTGGCGTACACTTCTGAGACAGACCG
RM20090700391_80CG	TCTTCTCTCCTCGACTCCACATTACACATCTGCACCAGAAGAAGATATTAAGGGGTTAGAAAACTGAGACACAAAATTC[C/G]G
RM20090700392_33CT	AGACATGGAAAATAATATATGACATAAAATCA[C/T]CCCCCTGGTACCGTTTGAGCAGTTTCTGAATGGTTAGTTAATAACGTC
RM20090700394_80GT	GAGTTTAGAAAAGTACTTTACAAACATGGCAGAGAATTCGACATATTACCTGCTGAAATGAATACATTATGTTTGTGTG[G/T]T
RM20090700395_60AG	GGCACAGGAGAGGGAGTGAGGACAGGTGTCAATGAAGAGGTGAGTAGTACATTCAGGTG[A/G]TTGTACAGGGCATTGAGAAAT
RM20090700396_42AC	TTGCCAAGAGAGGCCAGGATTTATCTGTCAGCACCCTGTAA[A/C]TTACATCAACTGGGGGTGCTTTATATAGTCATAATCCAC
RM20090700397_3AG	GT[A/G]ATGCATACTTAAATAAACAGTCACTTTGTCCTGGTGCCTCCCCAGCTCTGCAATATAATCACCCAGGGTAAATAGATG
RM20090700398_47CG	GTCCCGCCTGTCCGGCACTGCTGCCGGAGTCTCTCCGGCGCTAGAG[C/G]CCCTCAGCCCAAAGGCGCCAGAGCCCCTCAGCCC
RM20090700399_42AT	CTGCTGATGAAGACTGCAGAGGAGCCATTGGCCGAGGTCAC[A/T]GTGGGCATGTCTGTCCTTGCCGAGCGCTGCAAAAAGGCC
RM20090700400_23CG	CCCAGAGCATCGGTGAACTACA[C/G]AACTGTCATTGTTCACCCATAGACTACCCTTTCTTACCCTTCTTACCCTTTTTTCTTA
RM20090700401_34CG	GATGGCTGAAGGCTAACACAGGAGACTGGGGAG[C/G]CATCTCGGATTCCCAGACCCAGACTGGTGCAGGCAAGGACCCAGGGG
RM20090700403_70AT	ACATTCAACTCGCAGTTTCTTTGAACTGCACCTTGTGAAGTGTAAAAGTATTGTCCATTATGCATAATA[A/T]ATTCCCCCTTT
RM20090700405_1GT	[G/T]AGGAGCTGCTCCTCGAGTGCATCGCTGCTGGAGTGTGAGTGATCCTCTCAATCACAAACATGAATGTTCATCGAGTGTTT
RM20090700406_42CT	AATCTCCTCCAATTTACAGTAATCCCCTGGCCCTTAGAGCC[C/T]GTCTCTGTCCTTTACAGCCTGTGAAGGATTTTCTTGCCT
RM20090700407_76AG	CACAGCCTTCCATAACTTTGTTAAAGTCTCGCTGACCAAGAACCCGAAGAAGAGACCGACAGCTGAGAAGCTCCT[A/G]ACGGT
RM20090700408_6CT	CACGG[C/T]GGCAACCAGCGTTTCCCTGGCGACGGTCCGTTTCCATGACCTCTTGGGCCAGTTGGACAACCAGTACAGCCGCTT
RM20090700409_78CG	GACTGATTATTTACCACAGAGTGATACAAGATGTCTGCCGTTTCAACAGGATGGACTAACCTAACCTCCCCTACCCA[C/G]AGC
RM20090700410_5AT	TGAA[A/T]TATGTTGCCCTCTTTGTTTACTATTGTGCTATCATCAGATAATAGCTTCTTATGCTTTCGCCAAAAATATTTTTTA
RM20090700411_16AG	TATTTCTCCCTCTCA[A/G]GAGCTCTTCAGATGATGCAGTGTTACACTTTTAAGGCTAACAAGACAATGTAGTTACTGTGTATT
RM20090700412_4AT	CAA[A/T]GAGTCCACTGATAACACCTGTGCCTTTTGTCTGGAGAGATATCAACTCTCCTGACACCTAACATAGGAGGGATCTGA
RM20090700413_67AT	CATCCTGACATGACCCTCCAGCATGACAATGCCACCAGCCATACTGACCTGTTGGATCGGAGGGTG[A/T]GGGCTAGGGCCATT
RM20090700414_36AC	ATAGAATATGAACACAGCCAGCGTAAAGGAAATAT[A/C]ATTTTTCCAAGTGGGATCCCCTGCCTTTTCTATTGTCAATTTGGG
RM20090700415_56AG	GGGTACCATATGAGGGAGGGATTGCCTGCAATGACATCAAGCTCAGTTCGATGAT[A/G]CTGTGACACACCGCCCCAGACCATG
RM20090700416_35CT	AATGGAATATATAGGTCACTATAGATGTGGTCTA[C/T]TTTTTCTTACTCAGCCTCATCTGTGTTGATTCATCTTTTTATACCC
RM20090700417_3CT	TG[C/T]CGACATCCTGGTGAGATTAAGATGAAGAGAATATTGTCCCTCGCTCCCCTCCATTCTATTGGCAAATGCCCAGTCACT
RM20090700419_27AT	AAGCAAGATGTACTACAAGGCAGAAT[A/T]CCCTGTCCCCTTGATATCAGCGCACAGCTGGCAGCCCTGGCCATACAGTGTGAG
RM20090700420_62CG	ACATCCTGAGACCTCTGCAGTGTCGTACTGTAGCAGTGGCTTTGACAAGCATCACAGGAGA[C/G]AGGGGACCACTGGGAAAGA
RM20090700421_23AG	GAGAGTTTTTCAGATGACAGTT[A/G]GCTGTGTGCTGGGGAAGCGTAGGAGGCAATGGGCTAAACTGTGATGATTGGGATGACA
RM20090700422_24GT	ACCACTGGAAAGGAACAGAGGAT[G/T]GAGGGGAAGAGGGAGAGAGACTACTGACAGGTCTTATGTTTGATCTTTCTGTCTTGA
RM20090700423_10CG	GGGAGCCCT[C/G]TAGTGCAATCAGTACACAACACTATGCTCATCATGTCTTAGCAGGACCAGATGGTGACAGGGGTCGCAGCA
RM20090700425_67GT	TGGGGTCCTTTCAGGGTCATGTTCATTACAGCACATCCTAGTGAAATAATCATGAACATTTACTAT[G/T]TGATCACTTCAGAT
RM20090700426_14CT	TTAAGTAAAGTGT[C/T]ACAGAAAACAGTAATACATGTGTTTGTCTTGGTATTCTTCTACTACAGGGTAACATGGGATTGAACT
RM20090700427_11CT	CCACAAAGCC[C/T]TTGGCCCCTTCAGTTCCTGGACGCCCTGTGGTACCCTAGGTAACAGAGAAATATCATTAATCATCACAAA
RM20090700428_70AG	GCGTCAGCGACCAGGGATCCAGTGTTGGGCATGAAGCTGACTGACATGCTGGCGGAACTGCAGACAGAT[A/G]CACCTGGCGAA
RM20090700429_21AT	TATGCATCCCAGCTGTATAG[A/T]GGGAGCTTTGGGGATGTGCTGGAGTGGGGGACCATGCTGTCTGAGAACCACACATGGCCC
RM20090700430_4CT	ATT[C/T]ATTCCTATTACATAATACTGTGCTGCTGCCACGCTGCTAAACACACAGGGAATCACTGAGTGCTGTAGAGAGCCTCA
RM20090700431_34CT	CCCTTCTTTCAGGAATCTCACAGCTGTGATTGC[C/T]ACTGACCCGTTGAGTGTGTGGGTGAATGTGAGTGCAAGAGATTGTTT
RM20090700432_71CT	TACAAGTTGCCCATCCCTGGTATCAGGGAATATAAGAGACCTTTGGTTTGAGACCATGTGTTCCAAATGG[C/T]ACCCTATTCC
RM20090700433_39AT	ATCGCCCATTGGTTGATGCAATGGGGAACACGACCCTA[A/T]TTTGCTCTCAATGTGTATGGTATATTACCAGGATATACACTA
RM20090700434_69AG	CATCCTGACATGATCCTCCAGCATGACAACGCCACCAGCATTACTGCTCATTCTGTGTGTGATTTCCT[A/G]CAAGACAAGAAT
RM20090700435_67CT	ACGCTGGGGGAGCGCAGGCTGGTGACAGAGGAGCTGCTGATGGAACTCCGCAAAAACCTCTCTGGA[C/T]GGACCCCCTCTGCA
RM20090700436_35AC	GGGAAAGTGGAATGTCTTTCATGGAACATCAACA[A/C]TGTGCTGGTTTGCTGGTGCACGTTGGCTGTAGTGAAGGAGAGCCCT
RM20090700437_18AG	CACCACCTCATCGCCAT[A/G]GAGCTAAGCAGTGGGGAGGAATACTACGTAGCCTGTGATAACTCTGGCACGCCACTGGCCATC
RM20090700438_9AG	GGTGAGGT[A/G]CCGGAGGTCCCTCCTCCCCCTCTGGACATCGAGGGGTCCCCGGCGTACACAATACGGCCATTCTGGACTCGA
RM20090700440_36CT	CCCTCCCTCTCAGTCACAACAAACAAACCAATCTC[C/T]TGCTTGTTGAGTTCAATAACTACAGGCAGATGGCAGGTGTATAGT
RM20090700441_31AG	AGTGAAAACCAGGAGAGAAGACAACAATGG[A/G]CTATTCATGTCAGTCAAGATGCCTGGTCAGTTCAGTACACAAATAGTTCA
RM20090700443_72CT	TATCTGTTTGCAGAGGCGCTGGCTGAGGGAGCGGTGAAGATGGGCATGCCCAGTGCTCTGGCCCATAGCAT[C/T]GCTGCTCAG
RM20090700444_1AG	[A/G]AGGGTCGTTAGTGATTGGAGCCACCTGGGCTCAGGGTATTTAAACTGCTTCACTAACCTCTCGTCTCTCTCTCTGATCCT
RM20090700446_76GT	ATGTTCATCTTCATCTTCCATTGTGTCCTCCAGAAGAAGGTACGCTTTTCCTTCTAACCTTGTGGTCCAGTGCCC[G/T]TATTC
RM20090700447_6GT	CCACA[G/T]GAGGCAGCTTTGAGATTTCCTGCAATGACAACAAGCTCAGTCCGATGATGCTGTGACACACCGCCCCAGACCATG
RM20090700448_16AG	GAGGAGACTGGCTGA[A/G]GAGGAAGAGAGACAAAGGTTAGAGGAGAAGGAGACTGAGAGGAGAAGACGGGAGCAGGCGGAGAA
RM20090700450_81CT	AAAGGGCGAGGGACGGTTTTACACCGTGGTTTTGAGTCCCTTATATCAACGTTACATACAGTATATATCAAGAGCTTTTG[C/T]
RM20090700451_9CT	CACATGTA[C/T]ACTTCCTCGTCTAACATTAGGAGATACTATAGAAATGTGAACATTCAGAAACGGCAGACTAGGCAACAAAAA
RM20090700452_24AG	CCCAGTACCTTAGTGGCTGCGTC[A/G]ATAAACTTGACCCCTTTATAGGTGATGGAAAGGATGACAACAGGACCCTTTCTTGAA
RM20090700453_25CT	TTTCCCAAGTCCTCAGTCTACAGA[C/T]ATGATGATATAGAGCCTGAAGAAGACAGAGTCTAGAAAAGAGAAGGCAGTGTATGT
RM20090700454_75CT	GGACGGAACTCTCCATAACCTGATGACTGGTGATCCGCAGGGCCCTTCTTTACCGCTCAGCCTCAGCCCATAGA[C/T]ATATAA
RM20090700455_45CG	GCCGTCTGTAAGGTGAGCTGAGGCCACGGTGCGACTGAAGGGAC[C/G]TGACTGACTGGCATGTCAACCTATAACCCTAACCTT
RM20090700456_65AG	AGAAAGTGGAGATCCTGGAGAATAAAGCCATCTATGACTTGGGGAAGGCCCCAGAGAAATGAGG[A/G]ACAGGGAAGAGGGAAG
RM20090700457_21CT	CCACAGCTAGACATCAACAC[C/T]GTAGCAGCAGGCGGTGGCTCCCGCCTCTTCTTCAGGTCAGTCAGGACAACAGGTTCACAC
RM20090700458_49CG	GGAAGGAAAGGAGGGAAAGAAAGAAAGAGGCAAGTCAAACAACTTCTT[C/G]AAAACAACAAGCTGCAACAAGACATCCACTTT
RM20090700459_17AG	TCCCTGACTCTTCAGC[A/G]GTGGTGGGCCAGGGGTTCCAGTTGAGGATCCCGCCCAGGGCGAAGAATGGCAGTTGCAATGTTA
RM20090700461_69GT	GTTGAAATAGAAGTGGGAGTCTCCCGGGATGGAGCAGTTGAGACGGGTCTTCAGGAAGGAAGTCCACT[G/T]TTTCTCCAGAAC
RM20090700462_3CT	TT[C/T]CCCCCGGCAGAATTAAGAGACAACTATCAGCGTCCTGCAGACAGCTCCTCTCTGCCTCTCCTCACCTAACCCATTATT
RM20090700463_65AG	ACTTGCCACCCCAACCCCTCTACTTCCTGCTTTCCACTTAATATTCCCATACTTTCGGTCAAAC[A/G]TTGCCCGTACAGATCC
RM20090700464_66AG	AATACTAGATCATATTTACCGATATTGGCAGAACATAATGGGTTGAAGTCGGCTCTAAATGGAAC[A/G]CTACAGTTCTGTTCT
RM20090700466_7CT	GGGTAC[C/T]AAATGAGGGAGGAGGATGTCTTCCCTGTAACGCCCAGCGTTGAGATTGCCTGCAATGACAAAAAGCTCAGTGCA
RM20090700467_78AG	GGCATGTCATGTTGTTGAGCGTCTTAACTCTGGCAGGTGTGATGAGCAACTTCCTGTTAAACAGGAAGTATTTTACT[A/G]GTG
RM20090700468_39GT	CTGGGTTGAACGCACCGTTTTCGTGGAAGAGGAAAGTT[G/T]TCTGGTTGTAAAAAGACAAATGCCCCCTGTCACTGTGCTCGG
RM20090700469_78AG	AGCAGTAGTAAAACGTACAGCATTCTGCAAACATTTAATATTGACTACAACACTAACATTCGCCTTTGTGTTGGCGA[A/G]CGA
RM20090700473_62AT	CAGGCTGTTTATATTCCAACCCTGCGGAGCTCAACTATTACCTCTCACAAGGAAGCTCAGC[A/T]GGCCTAAACATACCTTCTC
RM20090700474_38CT	GAAACCAATGTCCAGATGGGGTGGCTACTTCCAACTA[C/T]CAACCTGCTGATCACAAAACTTGACCGAGTCCCTGAGGTACTG
RM20090700475_34AT	CTCTCTCCTTCACCCTCATGTATAGAATCTAGA[A/T]AGTTCCTTTCCAGGAGTGACACTTTCAGCAGACCACTGTGATAACTG
RM20090700476_57AG	ATTCCACAAGATTTTCAGGGCAATTCCTGTAGGACAATCTGCAGGATCCTTTCCTC[A/G]TCCTTCAGAGAATTCCCTGTAGGA
RM20090700477_9AG	AGACCTGC[A/G]TGCGTCAGACCCCAACTAATCAGACCCCATCCCGGAATCACCCGAACCACGGAGTCCCTAACAGCCGACGTC
RM20090700478_61CG	TACTGACCCCATTACACAGACGGGGTTCATTGTTTCTGACTGAGAGCTGAGAGAAAAGCG[C/G]TAAGACAGCGTCCAGTATGA
RM20090700479_73CT	CCGGATGTCCTCCTCATCGATGCCGTCGTTCCAGATGTCGTACAGGATGGTCATCTCCTCGAACTCAGAGCG[C/T]GGAGCGAG
RM20090700480_8AC	GAGAATA[A/C]ATCTCCCCTTTACCCCATCAGACCTCCGGTGCCCCACCGCCTCTCACTCAAACCAGATGTACCCCACACACAC
RM20090700483_14CT	TGACTGGGGCACT[C/T]TGCTGGCATAATACTGGTGGTTGCGTAGAGTGGCCAGCACCCCAGCGGAGTTCATGTGCTTCACGTT
RM20090700484_54AG	TGTGTTGTGAATGTGGAGGTAGCTCTACCCTGGACATGTTTCAAAGGAAGGAG[A/G]CATGTTATTTTGCAGTAAATAAAGTGG
RM20090700485_34CG	TGAGAGAGAAGTGAGAGGCCGGGCCAGGCTGAA[C/G]CATTTTGCACTTTTGAGGACAAATCAGCAGCTTTGGGGGAAGTCAGC
RM20090700486_1CT	[C/T]TCTCTGATCTAAGGATTTCAGGGCTTTATGTACCTCCTGCAGCAAAAAGCTAAAAGTTTGACCAACTCTCACTGGTTTAT
RM20090700488_50AG	TTTTAGGCACTCTCTAAGTGGCACAGACAGTTCTAGAGAAGTGTTCCTC[A/G]ATCCTGGTCTTGGGGACACATGATGTGCACT
RM20090700489_22AT	ACTTGGGCTTTTCCCCCTGTA[A/T]CTCACCGAAACAAACCAATGGCAAAAAGGGTATGGAAGCACAGAAAAGCAGCATGCTTT
RM20090700490_48GT	AACAGAGCACATGTCTCCTCTCTGTCACTAACCTTAGCATGAGTAGA[G/T]AAATGTTACGGCCCACATAAACACTAACTGAGT
RM20090700491_39CT	CTTATAGCTCAAAATACTTGTGCTAACAAACCCAACAC[C/T]GGGCTGCTCAGCTCAATCCCAAGCCCAATGAACACTGAGAAA
RM20090700492_12CT	GGAGGGGGTTT[C/T]GACGCCAGCAGTCCCACATAGGGCGACCTGCCATCATATGATCTTGCTCCGAGGATTTTCCCTCGCAGA
RM20090700493_34CG	AGGCAAGAAATCAAATCAGGGATACAGCATCAC[C/G]CAGTCAGACTACTGATACACCCTCATCACCCAATCAGATCACCGATT
RM20090700494_14GT	TGTTATGGAGATA[G/T]TTTTGGTTATGAATACACAGAGTAGAGTCTTGTATTTCATCAGTTTGGGCTTCTTCCTCAGGGTTTT
RM20090700495_15AG	AAAACAGTAGTTGC[A/G]CATGTTAAAGTTAAAAGCACACTCAGTCGTGCGGAAACAGGCTAACAAACAAAAAGAGAAGATCTA
RM20090700496_10AC	CTCCTCCCT[A/C]ACCACCTCCTCCACCGTGGGGATCAGACTGGTCTGCTGGTCACCTGAGTCCAGGTCCTCGTTGGATGAGAA
RM20090700498_34AG	GTTTGCCAAGACGATCAAGCGTCCGTTCACGGT[A/G]CGATATAACCCCTACACCCAGAGTGTGGACGTTCTGAAGGACACTCC
RM20090700499_33CT	CTATACAAAACGCTGAAATAAAATATAAAACA[C/T]GCATTGCCTTTGACAAGCTTCTTTTGTTGGCACTCCGATAAACATCAC
RM20090700500_39CG	TTGACACATAGCAGCATTTCTGTCAATAACGCTGACAC[C/G]CCTGCTGACATTCTACATGACCTGGCTGATTCTGACCACACA
RM20090700502_62AG	TGAAAACGACAATAAACACTGAAACATCTCAGCAGCCGCTCAATGGGGGGCATCATGGAAG[A/G]TGGATATGCAATATTATAT
RM20090700505_30CT	GCTAGCTCTCTGGGGACAGGGTTGGAGAG[C/T]CCTGGGCTACAGGCTAGCCTTCAGCCAAAACCAAGAGAGTCTACTCCATTC
RM20090700507_3AT	CT[A/T]ACAGAAATGTGATTTATTATCATAGGAATCACAAACTATCCCATTTAGCTGACTTCTAATACACTCTGGTAAATACCA
RM20090700508_65CT	AGAACTGGACCCCTGTGATGATATCTTTGTGTCCAAAAAAACGGAACGCCCTGGCCTTAGGGTT[C/T]AGATTCCAAATCATCA
RM20090700509_62AG	CTGGCATCGGCCGCAGGATTTATGACCATCTTTGTTTCATTTTTGTAGGGAGGCGACTCGC[A/G]CTCTGTCACCCTCCTCTTG
RM20090700513_25CT	TAGGAGAACATAGCCAATGGCCAC[C/T]ATTCATAAAAATCCTGTTTTCTCCAGAGAGCTTGAAATGCTAATAACATTTCCTCA
RM20090700514_25GT	AGAGAAAATCAAGTTTATAGCGTA[G/T]ACTTGGCATATGCCTTAAATCAATCTAATACATTTTTTGCTCACTACAGTACACCG
RM20090700515_80CT	CGTCATTCAGAGCAGAGAGCGAGGATTAATAACCTGCAGTAATCTGGGGGAGCAGGGCCAGGACAGAACCAGTGCCAGG[C/T]T
RM20090700516_30CT	AGCAAGAAGCTGGGCAAGGCTCTGGAGAA[C/T]CTGTCACGCAGTGAGTACAGTAACTAAACCCTAATGCTGTACCCTAAACCC
RM20090700517_13CG	AACTTCTCCAAT[C/G]AAATAAACACTGGCATTTCCATTGACCCTAATTTGACATGTTGGCCTCAGCCCCAAATCCTTTTATGC
RM20090700518_70CT	CTAAGCTGGCTCTTTCCATTAGTAGACATGGATTTGGGGAAATCTGTACTGTTTGTTCTCCACTCGTCA[C/T]GCTGCTTTATT
RM20090700519_16CT	CAGAAGCCCATAAAT[C/T]GTTTAAATAGGGAACACACTTTCTTAAAACATTTATCAGAACCCATCTATTCAATTACATGATTT
RM20090700521_76AT	AACAACACGGTGCCGATGAGCAAGACGAGGATTCAAGGACTATACAAGTACCTTACCTCTCCTTGAATCATCTCC[A/T]TGAAC
RM20090700522_35GT	TCTGCTGGTAGCTAACCAACTGGATTCAATGTTA[G/T]CTAGCTAACATAAGGCTATAGCTAGCTAAGCAAATAGCTCTGAGAT
RM20090700523_69AG	AGAACAACGGTGTCTGGTGAGACAAGGGGCGGCAGACTATGTATTTTTGTAAATAACAGCTGGTGCAC[A/G]ATATCTAAGGAA
RM20090700524_3AG	CG[A/G]CATAGTAACTGAGTGAGCTGAGCCATGTTCTGATCCTGTTATGAGCTGCTAGGCCGGTATCTTACCCGGCCAGCTGGC
RM20090700526_11GT	AGGGAGGGAG[G/T]AAGACAAGGAGGAGGTAGTGGTGGTGGTGGCAGAGCTGCCCATCTGTGGTGAGGTCATAGTGGTGTGGGA
RM20090700528_77GT	GTATCCCAGCTGTTGGGGGACAGAGAGAGAGGGAGAGGTTATCTATGAATATCCAGCTTCTGGGGGACAGAGGGGT[G/T]ATAT
RM20090700529_55CT	GGGGATTGATTGACATTTTGAAGCTGTAGATAAGGTACCAGTGGGTTAGCAAAG[C/T]AACTAGTTAGTTAACATCTTTAGAAA
RM20090700530_9CT	ATCTTCTG[C/T]AGCATCAAAGTCAGCTCTGTAATGATTGACATTCCTAGTTGCTTTGTTTTATTTTGGGATTGGTTTTCTGTG
RM20090700531_26CT	ACTCTTGAGAGCCCAACCAGTAGGA[C/T]TAAGCCACAGCATTTTATAGCAAAGTCCATCCTCTTGGATGTTCATGACAAACAA
RM20090700532_41CG	TTTGTTAGAATCAGTGGTGTAGTGGTGCCTGGAGAAGTGG[C/G]TATTTTGCCAACATTTTTCCAAACGGCCTGAAGGAAACAC
RM20090700536_33AG	CTCCTTAGTTCTAGAACACACATACGGGTGAG[A/G]TGAGTTGAATAGGGTGAGTTAAGGACAAGGCTGCCTACCACACACAAA
RM20090700537_80CT	GAAATAACCAGCCAACAAAAACTGTTTTATAGCTACACCTTGACCTTTTAACTTTCCCTAAAACGCAGACAGACCCTTT[C/T]T
RM20090700538_60GT	AGACTGATAGAAAGGAGTGAGGCCAGTCAAATCAACCCCCTCCAGCCTCAAGAGGAACA[G/T]CTGCTTGTCAAGGCCCAGCCG
RM20090700539_78AG	AGAACAGCGGCTTCTGGTAAGACAAGGGGCCACGGACTATGTATTTTTGTTAACAACAGCTGGTGCACGATATCTAA[A/G]GAA
RM20090700540_57CG	AGACTGGAACTGGTTCCACTCCACTCGCTCCGTCTGCAGGAAGGAAGACACTAACA[C/G]TTAGCTACTATGAAGAACAATCCA
RM20090700541_21AC	GAGAGTAGAGCCTGTTAGTT[A/C]ATTCTGTTGGTGTCACTATGTTGGATGCACAGCCATTTACAGATGTAAACTCAGTTTGAG
RM20090700542_26GT	CGCTGTGCGTAGTGAAAGGGGAATT[G/T]AAGTGATTAGTGGGTTCGATTCCCGGAACCATGGACAGCGTTTCTGAATCCCCAG
RM20090700543_27CT	TGAAATATGTTTTCTCTCTTTGTTTA[C/T]GGAGGTGCTACTCTCAGATAATAGCATCGTTTGCTTTCGCTGTGTAGCTTTAAT
RM20090700544_63CT	ACAACCCAGGTTAAGGGTGAGAAGCAACAGTACATGTCACAGAGCACCAGTAACAGCAATGT[C/T]ATAAGATCTTAGGTCTCA
RM20090700546_2AT	C[A/T]CGCTTAATTAAAAGTCTTCTCTCTGATGGGTAAACAAAAAGGAAAGTGAATGAAATGGTCTATCACTGGAGGCACAAAG
RM20090700549_45CT	CATCCTGACATGACCCTCCAGCATGACAATGCCACCGTTCTGTG[C/T]GTGATTTCCTGCAAGACAGGAATGTTAGTGTTCTGC
RM20090700550_73AT	CACACACAAGAACAGGCACACACGCATGTAGCATGTACTACACTCCAACTCCCTGGCTCTCCTCACATGTTC[A/T]GCACGACA
RM20090700551_61CT	TGAAATATGCTTTCTCTTTGTTTAGGGAGGTGCTACCCTCAGATAATAGCATCGTTTGCA[C/T]ACGCCGAAAAGCCTTTTTGA
RM20090700552_63AG	GTTAGAGAGGCAGTTATAGCACCCGGGTCCCATCAGGACCCGAAGAACATGGGAAGTAGGCC[A/G]CACTGCAAAAATAGCAGA
RM20090700553_25GT	GAGAGTGTGGCGGAGCTGGTCCAA[G/T]TCTGCTGGTCTGTCATGGCCAGTTCGTACAATCAAGGCACAAGGCGAGACCCAGAT
RM20090700555_29AG	CATTTTTAGAATCAATAAAGCTCCCCAT[A/G]AACATGCTTCTGTCTCCCTCATCTCGCTCTCTGGTTTAGTAGGTTCTCATGT
RM20090700556_80AG	TAAAACCTTCCGGAAAGCTGTTTATTATACAAGCACTTTACACTTAAATATTCCAGCCATCCACGGTTCAATATGGTTG[A/G]G
RM20090700557_23AG	GGGATGGAGGGATGAAGGGATA[A/G]GGGGGGATGAAAACCAGCTGGCCTTGGACTGGAGGAGTGAGCAGGCTTAGTGCCAGGC
RM20090700559_39GT	GGGTATCACATGAGGGAGGAGGATGTCTTCCCTGTAAT[G/T]TATTGCCCTGGCCACATCTGCAGTCCTCATGCCTCCTTTCAG
RM20090700560_52CT	GCTAACCAATCAGGTTCAATGTTAGCTAACTAACATTAGGCTATAGCTAGC[C/T]AAGCAAATAGCTCTGAGATACAAATAATA
RM20090700561_4AG	TGC[A/G]AAATTGACTGGCCGATGAACTCGGGATGGCTGGGCAGTGATTCTGGTTCCTCTCAATCGCTCATTAGGGTTGATTTC
RM20090700562_21AC	CTAGTTTGTCTAATCTTGAT[A/C]ATTGTTCAGTCGTTTAGTTGAGTGCTGCAAGGAAAGGCCTAGTTTAGATGCAGCTGGCCC
RM20090700563_58AT	TGGGTTCAGTACTTTCACATCAGTGTACATCTTATCAGGCGACGTTAAAAAGGGCAA[A/T]CTGCAGTTCAAATAAATAACACA
RM20090700564_31CT	TTTGGTCTAGTGCTACGTGTACTCTACACC[C/T]GTTTATGAAGCATGTGACAAATATTTTGAAGCATTTTGCGTCCACACATT
RM20090700565_21CT	TTATTTTCTGTTTTACTGTT[C/T]TCAAGCTGGCAAGGTCACTCACACTGAGCTCACTGTGGCCAGTTTCCTCATCTTATGTGA
RM20090700566_66GT	CAAAAGTAAGGTTGCGCTCGTTCTGTTCTCGGTCTATTTGATTTCAACTCATTTACCCTAGAAAT[G/T]AAATTACATTTGCTA
RM20090700568_80AT	AGACTAAGGCAGACACAGGAGGAGATGACTACCCTACAGAACAACATGAACCAGAGAGACCTCCAGCTTCAGAAACTAC[A/T]C
RM20090700569_18AT	AAAAACATGGTTTACAT[A/T]CAGTATAGGGTTCTGTATTTCAGTATTTTATGATGGTTGTCATTCATTCAATTTAAAAAGTTT
RM20090700570_72AT	TAACTTACGGTGTGGGTGTTGTTAGTCAACTTGGTGTCGAATCCCTGGAGACTTTTACAGTCCCCTTGATC[A/T]GCGCTTCTC
RM20090700571_77AC	TTTTTGGAGTGGGGTGTCAAAAAAGCAGAGCATGTCTTTTAATGGAGAGACAGAGGATGAGAGGCACATCTTTATA[A/C]GGAG
RM20090700572_33AG	CACCTTGGCATCCTTCTCCTGGGGACACACAG[A/G]GAGTCATCATTAACTCAGAGAGGAGTGGGAGGCTCTCATCACTCTCTA
RM20090700573_60AC	GACGAGCGGCAGTGTGCCAAGTGCAGGACCACGTGTTACCTGTCTGCCATCACCTGCCC[A/C]TGCAGCCCTGGCCGGCTGGTC
RM20090700574_64AG	GCTCCTGCACATCTTCTTTCACCAGCGTGATCAGAGAAACCTGTGCCCAATCGATGAATTTGC[A/G]TCCCCATTCTTGGTCTT
RM20090700575_71AG	TGTGTCAGCGAGAGGGGGGACGGGGTTCTCACCAATGTAAGGTCACATAGACACACACCCTTCTGCTCCA[A/G]CGTAGGTCAC
RM20090700576_5AC	GTTC[A/C]GTTTACTGTAGTTCATCCACTGCTTCCTTAACCCTAGTATCATTTATAAGAGCCTGTCTGTCATCTGTCACACACA
RM20090700577_25AG	AGAGAATAAATGTCAGCAGGGAGA[A/G]CAATGTGACGTGTCTGTGAAGAATTATAACTCTCACAATGTGTGAGAGTTGTGAAA
RM20090700578_64AC	AGGAGGACACAGGTCAGGCAGAGCCAATGTCCACTGGAGGAGCTCCGAAGCCAGGCTCCGGGC[A/C]CTTCCTGTTCTCCATCA
RM20090700580_60AC	GAGAAGTACAAGCAGAGGGGGTGGGGAATCTCTGATGGTTGTACTGTATTCAAACTGCC[A/C]ACATCACAAATGATCAACCAA
RM20090700584_16AC	TGTGTCTATGCATCT[A/C]TTTTAGCCTTGACAGACACCTTGTTTTGACTGCAATAACTCACACATCTCTCAGACCGTTTCTAA
RM20090700585_53CT	GAACCGCCCCTGCACTGCAGAGGGGCCGTGACAACACTGATACACGCTGTAA[C/T]TGTTAAAGATACACACTGAAACAAACTG
RM20090700586_31AC	GAACGGGGATCAAACCACTGCCTGCAAGGA[A/C]ATATCTGATCCAGGGGCACTGGCACTACCAGTAGACCAGCCACCAGGACA
RM20090700588_17GT	CCAGCCCAGATAAAAT[G/T]AGGAAGGGGTGCAGTGAGTCGATATACCAGGGACCCTGAGTGTGTTGGCTATATCGACTCGCGA
RM20090700590_65CT	TGAAATGTTCTCTCTTTTGTTTACTATGGTGCTATGCTCAGATAATAGCATCGTTTGCTTTTGC[C/T]GAAAATCTGACATTTT
RM20090700591_46CT	GTGAGTAGATGCCAAGCAGCCGTGTGGTTAGCCCAAGCTTCCACC[C/T]GTATTTCTCTCACATAATCTCTCACGTTCTCTTTC
RM20090700592_56CT	AACTGATCGCCTCTCAAAACACAGACAGCACATCTCGCAAATGCCCTTCAGCATC[C/T]CTGAACCCCTGAACTCCCGTGGACC
RM20090700593_52CG	CATGGAAGTGATGTCGTAATGTCTCAGATTTCTCTAAGTGACATTTTGAGA[C/G]TGGTTAGCCACAGGCTAATGCTATCAACA
RM20090700595_59CT	AACATACCAACTGTTTTGCTTATGTCTGTATCAATTTAAATAGACACACACAGAGCAA[C/T]ATCTGTCCAGTCATCTGCCCAA
RM20090700597_68AG	TTGATCTATGTATTGTCACACAGCGTGAAACCTGAGGATTTGGGAGGGGAGAGGGGGATGGTGATAC[A/G]TGGGCCCTTTGTT
RM20090700598_31CT	ATGAACTGATGCTTTTCCAAATTAGGTTTA[C/T]GTATAGTAATAAATAAGCATTGCATGAAATTTCACTGAATGGCGCCCAGA
RM20090700599_61AG	CATCCTGACATGACACTCCAGCATTACAATGCGACCAGCAATACTGCTCGTTCTGTGGGT[A/G]ATTTCCTGCAAGACAGGAAT
RM20090700600_63CG	GTAAAGCCAGCGATCAGCAGCAGCCAGAAGCAGTCTGATTTAGAGCACACACAAACAGGAAC[C/G]TTGAGAATAAATCACCAG
RM20090700601_66AT	AACAAAGCTGACACCACCACGACAACAAGCAAGACAAGACAGAAAGAGTGGGAGGAGAGGAGGAA[A/T]AAAACATCAAAACGA
RM20090700602_77CT	TGGAGGGAGAAGAGCAAAGCCCTGCAGAGGGACTGGGGGACTGTGGTCACTCATCCGTCACACAGTCACTCATCAA[C/T]AGCA
RM20090700604_37CT	CCCGGCCCGTCACAAGGAGTCACATGAGCCAATTTG[C/T]ATTTAGGCAATCGTTTGAAAATGACATTTCACATCATCTGCATC
RM20090700605_31GT	GTTTTTCTGAGCTTTCTCCAGTGTAAAGCA[G/T]TTATACTCTCCACGAGGTAGAGAAATAGCAGTTTCATCACTTTGTGGTCC
RM20090700606_50CG	ACACAGTAAAGCCAGTCTGTTGTGTATATGTTACTCATTTTATTATTAC[C/G]CATTCTATTTTTCTATAATTTCTTTATTTTC
RM20090700608_35AC	TCTTCACTGTTTAACCACCACCGCAGGGCTCTTC[A/C]CTGTTTAACCACCACATATCTAGCAGGGCTCTTCACTGTTTAACCA
RM20090700609_29CT	CAGAGGCAGGCCTTCCTCATCACCAACC[C/T]CGGGGCGGGCCTCCTGCGGCCGGCCGTCAACGCCACGTATGGCCCCCTGTCT
RM20090700610_1CT	[C/T]TTCATGTCTTTCTCCAGGTTCAGTCTCTCAGACGTCTCGGTCTCCAGCAGCTGGGAAGCCGACTCTCCGGCGTTCCTCTC
RM20090700612_40CT	GTTCAAAAAGAGAGTAAAGATACTGTGCTGTGCATGGCG[C/T]GTGTATGTCCTTGGACCACCCCGCAAACCTGATTGGACAAT
RM20090700613_61CG	TACTGGGAATCCCCACTCTCTACTAAGGACTGGAGCCCGTCGTAATGTCCCACCATCCAG[C/G]TATTGAACCTCCAAGGGTTT
RM20090700614_75AG	CAGTTGCTGGTTTCGGAGCAGGATGTGGAGAACTACAAGCAGATCAAGACTAACCTGGACCAGCTCAGGCTGGC[A/G]GTGGAG
RM20090700615_75AG	CATCCTGACATGACCCTCCAGCATGACATTGCCACCAACCATACTGCTCATTTTCCTGCAAGACAGGAATGTCA[A/G]TGTTCT
RM20090700616_41AT	CAGGCAATTCTGAGGCAATAGAGGATGGGATGGAAGGACA[A/T]GCATAGTAAGGCTTCAACAAGTTCACATGACAGCTGTGCA
RM20090700619_10AC	AAAAAGCAT[A/C]GCTACGCCGGGTGGGACTGTATGTGTGTGTGTTTTGTGTTTTTTGTGTGTTTTTGTTTATGCATGGGTGTG
RM20090700620_18GT	TGGTGGACTTTGTGACA[G/T]GTCTAAGGATTTTGATTAGCTCTAATACAGACAACAGCTTGAAAAGTTAGGATACCCAACAGG
RM20090700621_52CT	ATGTCCAGGGGATGAGTGACCTCTCGGCTCCTCTCCTGTTCATCACCCAGA[C/T]CGAGGTGGAGTCCTTCTGGTGTCTGACAG
RM20090700622_8CT	CCACTGG[C/T]CAGAAGAGGCCCTCCTGGTGCTGGTAATGCTCCCCCCCACCCACCTCTCTGGACCACTGTCCCTTACCATCTC
RM20090700623_66AG	GAGAATAACCAGGTAAGAAGCCTAGAGGAGAAGATTGCTAAAGTTTTTTGAAAGCAGCACTCTAT[A/G]AATATGAAAGCAGCA
RM20090700624_24AG	AGGAATGTCAGTGTTCTGTCATG[A/G]CCAGCGAAGAGCCCGGATCTCAATCCCATTGATCACGTCTGGGACTTGTTGGATCGG
RM20090700625_80AG	AAAAGGTTGATGAGTTTTGGACCGGTGCGCTGTGCCGGTAAATCGTTACTTTTGAGGACCTAAAGCGCAGGGAAAACAG[A/G]T
RM20090700627_15CT	AATATCTCTTAGAA[C/T]CGCTATAACTAGGACTCAGGGCCCGTATTCACCAATTGTCTGATCTAGGATCAGGTCTAGGATCAG
RM20090700628_76AG	TCCTAATTCATTCAGAGGTAGTAGCAGTAGCAGTGGAACCATGTACCCAGTCTGCCGTTACACAGCATAGTTATA[A/G]TCAAT
RM20090700629_1AG	[A/G]CACTGGGTTCTCAGCTTTACAGGGAACATAAATCTAGCCAAATTACCCGTAATGGAGCCGACTGGGGAGCACAGATCCCA
RM20090700630_64GT	CTCCTCGACCGCAGGGTAGTCCGAGTGCTTCTTGGGCGTCCGCTTCAGCAGCTCCTAGTGGGG[G/T]GAGAGAGAGTAGGGAAT
RM20090700631_5GT	TACT[G/T]GCACAGCATATTCAATAGCGGGTTGAAACCCTTCATTCCCTCAGTAAGTCACTCACTTCCCTTGCATGCATGCAGC
RM20090700632_9AG	TTCTCTAC[A/G]CGCCCCCTACTGGTGCAACCAGCCCACTACGCTGGGGACCCCGAGTGGGTGAGCGACACGGAGACCTCCACG
RM20090700634_44CT	TCAGTTAAACTGATATTTGTTATTTCTGTTTATAAAGTAACAG[C/T]AGCCTTACCATCATCTGCAGAATGGGACTGTAGATGG
RM20090700635_53AG	AGGTACCACATGAGAGAGGAGGATGTCTTCCCTGTACCCTGTAATATACAGC[A/G]TTGAGATTGCCTGCAATGACAACAAGCT
RM20090700636_79AC	TGATATTCGGATGTATCGATCCTGTGCAGCTGTTACACGTGGTCTGCCACTGCGAGGATGATCATCCGTCATGTCTCC[A/C]TG
RM20090700637_67CT	TAAAGACTGGATTGTGTTTAAACTCTACAGGGACCTGTGAGATACATGGCTGGTGTCCCGTTGAGA[C/T]GGTCCGGAAACCCT
RM20090700638_38AC	AACAAACCATCTTCTGATCTTTCTCTGACTATTATCT[A/C]CCCAGGGGTAACCAAGGTAACCAGGGTCACCAGAGTAACAAGT
RM20090700639_71AT	TGTCAACATGCAGTGCAGGACAAAGGGGGTTTGATGCAGGACTGATGCATGTCTACACTGATCAGATCTG[A/T]CATTAACATG
RM20090700640_10AT	CTGTAGTTC[A/T]CTCTCTCCTCTCAACTCTCCCTCCCCCTACAGGGCCTGTAGTTCCCTCCCTCCCCCTCTCACCTCTCCCTC
RM20090700641_2CT	C[C/T]CCAGCCTTTTCTGTACCTGACACACTCTGTTCCCCATCTCCTCCTCTCGACTCTTGACGGGAAGAAAAAGGAAAATCAC
RM20090700642_32AG	CTGGAGCTCTAGCTGGGTGACGTAGTGTTCC[A/G]CCATGTTGGCTCCCTTCACGGTGATGGTGTCCAGTAGACTGCTGTGACT
RM20090700643_72AT	TGAAATATGCTACTCTCTTTGTTTACTGTTGTGCTATCATCAGATAATAGCTTCTTATGCTTTTGAAAGTT[A/T]GATTTTTAT
RM20090700644_26GT	GTGACCAATTCAAATTCAAGAAATT[G/T]AATTGGCATTTTAGACCAATTCAACTTAGAATCAACCCCAATTGGGGAGCATTGT
RM20090700645_34AG	TCTTTTACTCTCTATGGTTGTCTGTAGGAGCGT[A/G]GAGATAAGGGATCCACCACTTGACTGAGAGGAGGACTGAGGGGAGGA
RM20090700646_23CT	CGTTGCGCCCCACAAAAGCACA[C/T]AGTGTACAGTACACCATAGAGAACATTATGAAGAAGCCACAACTACGGTAATCCTCTT
RM20090700647_56CT	GGACCAGCAATAAGAGCTCAGCTCAACGCATTAAAAGGTGTGTTATGTGAATTAG[C/T]CTTTACCTTGCAAATGATATGACTG
RM20090700648_2CG	G[C/G]TTAACACATGAGCGAGGAGGATGTCTTCCCTGTAACGCACAGCGTTGAGATTGCCTGCAATGACAATAAGCTCAGTACG
RM20090700649_53AG	GACACATCAGACCCCACCTATACTAGCTCCCTGGTGAGTACCCGTGTCTGTC[A/G]AGAGAGTTGGGTGATTCAATAGTTGACC
RM20090700650_46CT	CTACTGTCTCGCTCCTGGCTGGTCCAGGGAGACGTCACGGTTACT[C/T]TGAAGTTATGTGGAGTCCTGGAGCGCCATTTTGAG
RM20090700652_15AG	CTCTGAGAGTAAAA[A/G]CTCTGAGACTCTGAGAGTCTCAAGGATGGTCAGGTCCAGCCTTATTCCAAAATTGATTAAATATTT
RM20090700653_50AG	CAGCTCCAAGTCCAGACTGGTCCGCAGCAGCCCATCCAGGCCCCGCACC[A/G]GCACCGGGGGCTGAGGGGGAGGAGAGGAGGG
RM20090700655_62AC	TATTAATTTAACATGAGAATTCTGTGAATGGAATATTGTACATTTAAACCAACTTCTTCTG[A/C]TTTGAGTTCATACTGATAA
RM20090700656_42GT	CAGACAGGCAGCAGAAAGAGAAAGGTGTACACAGGAAGAAT[G/T]AAATGAAATACAGTAGAAGAGTGCAGCAGTCAGCAGTCA
RM20090700657_33AG	GGCCTATTGGGAGGCCTGCCACAAACCCACAG[A/G]GCACGTAGACCAGGCCTTCCATAGACCTACAGAGCACGAATGCCTAGC
RM20090700658_54AC	CAAACACGTCATAAGAAGAAAACAGAACAGACTTTTTATATGAAAATAGAATA[A/C]AACGAAGGGTATAAAACACATGAAGGC
RM20090700659_22AG	GCTGATGAGCTGGTTGCTGAC[A/G]GGCTGGTCCTGGGGCTGGCTGCAGGCTTCAATCTCATCCTCTTCTTCCAACTCACTGTC
RM20090700660_63GT	TGGTGTTTTACAACTTGTTACAAGCCTGTATGAGCCTTTAAAATGTGTAAATCTTCTGAGAT[G/T]AGCTTGTTTAGTCATCAG
RM20090700661_18AG	AGGGGTTCATTACAGTT[A/G]AACGAGGAGGGGGATTCAGAGAGGAACCATTAGCGGCCAGTGAGGGGTGGGACTCTGGTTTGA
RM20090700662_5AT	GAGT[A/T]CCACATGAGGGAGGAGGATGTCTTCCCTATAATGCACAGTGTTGAGATTGCCTGCAATGACATCAAGCTCCCTGTA
RM20090700663_74AG	AAGGTGCTGAAGTGCATTGCCCCCATTACCATGTCAGATGTGGTGTTGGGGCAGTATGTGGGTGACCCAGAGG[A/G]AGAGGGG
RM20090700664_46CT	TCCATAAACAATTTCATATCTATACTCCTATTAGTGAAATTGGAA[C/T]ATTATCTAGGCCTACCTACAATCATGGATTTGAAA
RM20090700665_24GT	GCTCTCTCCACCTTCTCCCTGGC[G/T]ACGCGCCTCGAACGTGACCTGTCCTCGCTCCATGCCGTCGTCCTGGCGATGCAGGAT
RM20090700666_48CT	CGCTGATTGTGGCTCTCCTCACGATCCGCCAGCTTCAGGACGAATGC[C/T]GCCTCAGAGTTCAGTTTCCTGGCTACTGGGTGG
RM20090700668_41GT	TGAAATATGCTAACTCCTTTGTTTACTGCTGGTGCAGATG[G/T]TGTAGGCTATCAGAAAATAACTTCTTATGCTTTCGCCCGA
RM20090700669_75AC	GAGAGGGGACGCAGGGAGAGGGAAGCCAAGACGATGGAGCCTGGAGCTTGGGTACCACCACAAGATGTCCAGGC[A/C]CAGCTG
RM20090700670_45AT	CTGGGGTGGGCACTGACCACCCTCCTCAAACCTCCACACTCCTC[A/T]GACAGACAGGGCCCTGAACATACCTCACATTCCTTC
RM20090700671_79CT	TGAGACGATTGCCTCGTCCAACAAACACCTGTTTATTCCCTCCTTCAATTTACCAAAAAGAGAAAAGAGGAGGGTGGA[C/T]GG
RM20090700672_46AT	AGCTCCAGCTTCAGCCGACAGCAAAGGATTGGGTTGCCGAAAAAT[A/T]AAGTAAAACTGGGATTTGACCGCTTGAGGGCGCCA
RM20090700673_37AG	CATCCTGACATGACCCTCCAGCATGACAATGCCACC[A/G]GCCATACTGCACGTTCTCTGCCTGTCACTCAGCTTTATATAGGT
RM20090700674_60CT	TCAGCCTCAGCCCCATTATGTTCGATAGAGAAAGGGAGCACGCATGTGGACGAAAATCC[C/T]GTTTCACTTCCACACATAGGG
RM20090700675_35AG	GCTAGGACTTCTAGAGGGGTGCAAGCTGGTCACC[A/G]TCCAGCAGACGCTTTCTGAAAAAGTCAACAACAACCACAGGCACCT
RM20090700676_31CT	GCCCTGCCTTCAGTTCATCACCTTTCACCT[C/T]AACTCCTGTACTGTATACTGTATAGCTGAACACATCACTACTATGTTCTT
RM20090700677_8GT	AAATTCG[G/T]CCCACTGGCTACGAGTTGGGGAAAAGGGCTCTAAAGTCACAAAGTCATTGTATTGCCATGTTGAGGCTATTGA
RM20090700678_43GT	GACAGCGTGGCGGAGCTGGTCCAACTCTGTCGTGTCTGTCAT[G/T]GTCAGTTCGTACTATAAGGGCACAGGGTGAGACCCAGA
RM20090700680_24AG	TCTGGATCAGGTTTGCTTAACAC[A/G]AAGAAGCTCCAGTCCTGAAGTCTTGACTAGTTGGCCAGTCATAAATAAAAACATAAC
RM20090700681_60CT	TGACGGACTAGAGTAACAGAACAGAAAAAACAGACACACTGGTTTGAAGTATTAAATTG[C/T]AGGCAATGGGCTCAAATCCTT
RM20090700682_44AG	AGTTCTGAATGATTCATTGCCATATACATTTACCTGGCTAAAA[A/G]GTGAGCCACTTGCGTGGTACCGGTTATCCCGAGTTGA
RM20090700683_71CT	TTACCTTACCCTCCTCCTCCTACTGGCACTTCACACCTCTCACCACTAGAGGCATCAAACACTCCATGTT[C/T]TGTATGTTGC
RM20090700685_59CT	ACCAAACTACCTTAACCTGTCTAGGACTGGGGTTCCGCTAGCCAGTGAAAGTGCAGGG[C/T]GCCAAATTCAAAACAACAAAAA
RM20090700686_7AG	AGAGAG[A/G]ACACATTAGAAATACATGGGACAGATATTCCTATAGTATTAGTAATCAGGTCAGCTCTATTGACAATATTTCTA
RM20090700687_53GT	TTTGTTACAAACCTACTCTACCAAACCTGATTCTACTAATCAGTTTCTCCTC[G/T]GGACCTGAATTAGTCGAATCAGGTGTGT
RM20090700688_42GT	GACACAGGGCTGTTTGTCACAGAGCAGGTGAGGATTAAGGC[G/T]ACATGCAGAAACACATTGGTTTTAATAATAAAAAAGCAT
RM20090700689_60CT	AGATGCAAGATGCAGAAATAAAAATATAAATCATGCCTTACCTTTGACGAGCTTCTTTT[C/T]TTGGCACTCCAGTATGTCCCA
RM20090700690_18CG	CTCCGGTCCAGGAGAAA[C/G]GCTCTTTTCTCCCCCTGGAGGATGGCTGTCATTTTGTGGGCCGACATAGGCATCTGTATGCAC
RM20090700691_19GT	GGCGGAGAGAGGAACGTT[G/T]GCTCTTTAAAGACTAAAAACACAGTTCTTTCTGTTTTAGCCCGTGATGCTGCGCCTACCCTC
RM20090700692_46AG	AATGGGGGTGGCATTACTGTGCGGATTATTCCAGTGTGATGGAGG[A/G]GGTCGGTGCACTGTAGGACTGGTCTGACTGTTTGC
RM20090700694_3AG	GC[A/G]TTTATATTATTTGTGTTCAGTATAAGCATCTTGTCTGCTAAATTAACAAAACAAGGTTATGCAATTGAACAGCCACAA
RM20090700695_23AG	CCCTGTCTGCTCCTGGTGTGGG[A/G]TTGTTTGCAGAGGTTCGCAGTCCCCCCTCCTCCGTCCACATCAAGAGGCCCATGAACG
RM20090700696_69AC	CTGGGGGGAGGGGCCTCAGATCTCTGTACTGCATATAATAAAGTCCTATTCCAGTCTCCCTTTCACCT[A/C]ATTTAAGACCTG
RM20090700697_14GT	TTGTTGCCTAATA[G/T]AAATTGTGTTTCTATTTTGGCTTTGACATCTCTCCCCACAGAAGGGGAACACTGAATGGTTAGTGAA
RM20090700698_81AG	TTTGGACCACTTGACAGACTGCCTGGTGAGGACGGCTACATATTGAGCCATCATCTCCTCATAGGATTCATGACCCTCAG[A/G]
RM20090700699_54CT	CTGCACTGTGCTGTGGTGCTCCCCCTCAGTGGCCCGGAGAGTCTGCATCAAAC[C/T]CTTGATCCTCTCCTCCAGCTCCTCTTT
RM20090700700_43AT	GATGGAGGCTGGGGGTGGGGGCTTGTTGGGAAAGGTTTTCAT[A/T]AAAAGTCAATCTGGTCTCATATTCTGTAGGTAAATCTG
RM20090700701_65AG	GACCCGGTACCTGTACACAGACCTGCAGTGGAAGGACCCTCAGAACTCCACCATCACCAACAAC[A/G]TCACGGCCCTACAGTT
RM20090700702_53GT	ACCCACCAATCCCGATGAAGTTTTAAACTCTCTCTGATCTAAATCTAAAATA[G/T]ATGCCAAAAGGAACACTGCTAGACTAAT
RM20090700703_25CT	CAGACCTCTTGGCAGAGGCTGCAG[C/T]CAGGGAGGTTATAACAGCAGTGTTTGATGGATTGTTTTGCACAGTGTCTCTGTAAT
RM20090700704_81AT	AGATCAAGAAGGGGACAGAATGAAGATTTTAATAACCTTATGTGATGAGATGATTTTTGTTTCTGCCTTGCTAATCATGA[A/T]
RM20090700705_81AC	GTTTGTCTGATACCCTCCCTATGGGTTTATACAGTATATTATGCCTGTGACTACTGTGGAACTGTACAGCTAAGCCATAT[A/C]
RM20090700706_81AC	CCAGCATGACCCTCCAGCATGACAATGCCACCAGCCATACTGCTCGTTCTGTGTGTGATTTCCTGCAAGGCAGGAATGTC[A/C]
RM20090700707_68CG	CATTATGCCCCATCCATCCCACGTCTGCCACGCCCCCCTCGCCCACGCTGTGGGCCTGCTAATTGGC[C/G]CAGTGTACAGTGT
RM20090700708_27AC	TGATGCATTATGATGCAGTTATAATG[A/C]ATTATGATGCAGGTATAATGTATTATCAAATCAAAGTTAAGTTGTCACGTGCAC
RM20090700709_23CT	TGGCATTGCAGGCTTTGTTCTC[C/T]CTGTTGCCCCCAGAGCAGCAACTCATCTGGCCCTGCTGTCAGAGAAGGGAAGAAACCC
RM20090700710_39AC	AAGAAAAGTAGAAAAGGAAAGTGAGAATACACACTGCA[A/C]AGGGGACTGTTACACAGAATGCATATCTAGACAAATATTATG
RM20090700711_39AG	ACCCAGCCTACCGTTGGAATGAACTTCAAAACACCCAG[A/G]GGAGTCTAGACACGTTTCATATCGCTGTCAATAAAGACAAGT
RM20090700712_55AG	TACGCTAACATAGAGACATTTTTCAAGTCCGCCACCACACCAGTAGAGGGGAAG[A/G]TGAGCTCATCCTGTCAGGTCCAAAAC
RM20090700714_36AG	TCAACCTGAAATTGACTTGGTCCTGCTGGAATTGC[A/G]ATATTCTTCAGAAATATTCAACATTTCTGCAGTACAAGCCATACT
RM20090700715_66AG	TGGCTTAATGCAGGGGCTTACCGGGGCTGAAGTCCCTGGGCCCAAGCCTGTGGGGGGGCCAAGAG[A/G]AAGCAAAATAATATT
RM20090700716_29CT	CTCGCTACAGCTGAAACAGAAAGCTCCT[C/T]AGACCTGACAGAACAGCCAGGTATAGGGCTAACAAAGAAGTCACAATCACTG
RM20090700717_46AC	GAAACATTATCACATACATGACTAGCTAGTTAGCTGGCTAACATT[A/C]TAGGTTTATGGAGTCACATATAACAATACAAATCA
RM20090700718_48AT	TAAAGGTCCAGAAGGTGATTGTCCTGTTGAAAACAAATGATAGTTCC[A/T]CCAAGTGCAAACCAGGTGGGATGGCGTATCGCT
RM20090700721_8CT	CTTTCTA[C/T]GCAAGTCCATTCTGTCTTTACCCTGTCTAGGACTGGGGTTCCGCTAGCCAACAGCCAATGAAATTGCAGGTCG
RM20090700722_58CG	AGAGGCAGGGTCTCCCTGCAGACTATTGCCCAGCTTGTCCACCTCATCCAGCAAGAA[C/G]ACAGGGTTGTTGACTCCCACCGT
RM20090700723_41AG	AGGACTGGTACCCCTGGGTGGAGTCAGAGCCGAGGTGGGA[A/G]GAGCCATTGGTGTAGCTGGTCTCCTGAGATGTGTTGCTCT
RM20090700724_81AG	AGCTGGGAGCATCTAACATCCCCTCTTATTAACTTCCTAACCCCAATGTTTGATGTTGAATAATTCCACTTGGGCTCTCA[A/G]
RM20090700725_60CT	TGAAATATGTTTTCTCTCTTTGTTTACTATGGTGCTATCCTCAGGTAATAGTTTGCTTT[C/T]GCCAAAAAGCCTTTTTGAAAT
RM20090700729_36AC	CCGTATTCATTAACTGCAGCTCTATGACCATAAAA[A/C]CTATGATTATGAGGGGGTGACTCCATTACTAGGAAGTTACATAGC
RM20090700730_16AG	CGCCTGTTGATCGCG[A/G]GAGTGGTCAGTTTCCAGGAGAAATCTTAGCCATCCCACCACATTCTCATCAGCCGTTAGATGACT
RM20090700731_43GT	TTTGTGGTCTTGCTGAAGTCTTCTCTGTTGCTGATTAGCATT[G/T]AATTTTTTTTGTGTGTATTTTTAGGCAAATATATTGAT
RM20090700733_49AG	CGACACAAATAACATAAATAAAAATATAAATCATGCTTTACCTTTGAC[A/G]AGCTTCTTTTGTTGGCACTCCAATATGTCTCA
RM20090700734_18GT	GAGGGTCGTTAGTGACT[G/T]GAGTCACCTGGGCTCAGGGTATTTAAACTGCTGCTTCACTAATCTCTGTCTCTCTGCTCCTCC
RM20090700735_50AC	GCATTTGATCCAAATGATATGGACCCTGATTTAACTTTCATTGTTAATT[A/C]GTTTATTTTTAATGGAAGATTCTTTATCTGT
RM20090700736_18AC	TCTGTGTCTATGAATCT[A/C]TTTTAGCCTTGAGGCGCTTTCTCACAGACACCCTGTTTTGACTGCAATAACACATCTCTCAGA
RM20090700737_78AC	ACCTTGAATACCTGAAACACCAGGCTACCTTGAATACCTGAAACACCATGCAGGCTATCTTGAATACCTGAAACACC[A/C]TGC
RM20090700738_75AT	TACCTGTGGGAGTGTGTCTGTGTCATTGACTTTGTATGCCTGTGAAAATGTACTTGAAGATACTGTATGTGCCA[A/T]ATATAG
RM20090700739_8AG	GGCAAGC[A/G]TTTCTGCACCACTCTTATTGTCTGCTGCTGCTTCTGCTATTTATTGTATACATCAAGGTACGCTACATGACGA
RM20090700740_51AC	TCTGTCTACTCTTTGGGAATTATAAAGGAGTTTTGGCACAATGGGCCTCA[A/C]TGAGTGGATATCAGACCAAGGCTTTCAATT
RM20090700741_50GT	TGAAATGTTTTCTCTCTTTAGTTTACTATGGTGCTATGCTCAGATAATA[G/T]CTACGTTTGCTTTCGCCGAAAATCCTTTTTG
RM20090700743_75GT	AACCGTATCAGTTCTCTCCTGTGAAGGAGATGTCAGAGCAGTCTACACCTGAGCCGAGCCCTGACAAGGAGCAG[G/T]ACGACG
RM20090700744_33GT	AGATGTTCTGCTGAGATAAGTCAATTGGAAAT[G/T]ACTGTAGAATGGTGGAAGTCACCTATATAACTGGGGATGTGGTATGTA
RM20090700745_47AC	CATACCAAGATAATTGTGTTATTTTCATTTAATCGTACATTTATTT[A/C]AACAAATATTACTTTATTACAATACAAGAGATTC
RM20090700746_6AC	TTAAT[A/C]ATTGATGATCCCTATTTTCTGCCTTGTAGTAGTAATAGGAGTATCATTTTATGTAATGTATGATCTCTTCAAGGG
RM20090700747_52AG	CAGGAACCCCTCTTTATTCATCTATTGGTCCATTTTTAAGTTAGGACAGGC[A/G]GGAGGTGGGGGCGCTCCAGTACAGTAGGT
RM20090700748_4AC	CAA[A/C]ATTTTTCAGTGTCTGGAGCTCCCGGTCCAGCTCAGTGGCTCTCTGGATGTGCTTTCGTCTCTCGCTTGACACAGGGA
RM20090700749_1AC	[A/C]GACTCCAACAAGCCAGCAGAGGTAACTAACCGCCCCGGCTCCGAGTACTCTCATTACTCCCTAGTATACTCCTAATACAC
RM20090700750_69CT	TTACCTCCAGCCCTGCTCTAACCAGCCCTCCTCCTGGAGAGCCCCCCTCATGCAGGCCTTACCTCCAG[C/T]CCTGCTCTAACC
RM20090700751_1AG	[A/G]AAGTCCAGTGTGCGCCCGTCCACCACCAGGGTGAAGCCTGACGTGCCCTCAGCTGCCTCGCCACGCTCTACCTCCGCCCG
RM20090700752_48AG	TAATGAGGCGGTTATAACGCAGCGTAAGACATGTCATACGCATGCAC[A/G]AGTCCTTAATAACGTCTTCTCATAATGATTCTG
RM20090700753_12AG	CGACACAAAAC[A/G]CAGAAATAAAATATAAAACATGCCTTACCTTTGACGAGTACCTTTGGCACTCCAATATGTCCCATAAAC
RM20090700754_26AT	CACCCTGACATGACTCTCCAGCATG[A/T]CAATGCCACCAGTCATACTGTTCGATCTGTGTGTGATTTCCTGTAAGACAGGAAT
RM20090700755_61AT	AAAGGTAGGGTCTGTTACCTCACCTGGTGGTTGGGGCTGGTAGAGAGACATCTTCCCAGG[A/T]AGAGGGTGTCTTTGTCACAC
RM20090700756_36CT	GGGTGGTCTCCCCAGAGGATAGGGGTGTTCCTGGA[C/T]TGTGATGAGAGGAAGGTGTCCTTCTATAACGCTGATGACATGAGT
RM20090700757_77AC	GTGTCTAGGCAGTTGTACAACTTATTAAGAAACAGCTCAACTTAAGTTAAATTTAGATACAGAACGTGTAGCAAAA[A/C]AAAA
RM20090700759_69CT	ATAACGTGCAGATTTCATTTAACAATCAGGACATCATATTGACTACTGTTTAACAGCACAGTTGACAG[C/T]GATTCAACCTCA
RM20090700760_52AT	CCTGCGGTGAGATACAAAGCCATCACATTTATCATCGTGGAACAGCGGGGC[A/T]TTGACTTTCTTTGAGTATTGTCAGTGTGT
RM20090700761_30CT	TCAGCCCCGGAGTCTGTCAGTCAGCTCCT[C/T]GCTGTTAAGCTGGTGGTTCTTACTGTGTTTCAGTGCCCTGGAAGTGAGTTA
RM20090700762_72CT	TTCATTGCCATGACGATGAAAGTGTCTTCAGCGGGGGAGTTAAAGGTAAGTTATTGCACAGTTCTTCAACA[C/T]GTTCATACA
RM20090700764_17CT	CCATGTGGTGTTTGGC[C/T]TGGTCATCTCAGGCTTTGAGGTGATCAAGAGGATTGAGGGTCTGAAGACGGACGGAGCCAGCAG
RM20090700765_42AG	AGCAACGAGCCTAATGCGGCCCCCACCCCCACGACCCCTAC[A/G]GAGCAGAAGTGTCTCAGCCTCGCCTGTCTAGACAAGTGA
RM20090700766_54CT	CCTAACTTCTCCCAAGCGTTCATTGTGCAGGTAGACGCCTCAAATATGGGGCT[C/T]GGAGCCGTCCTAACTCAGGGTGAAGGC
RM20090700767_71CG	CACTTATCTGATACGGTCTCTCTTCTTAAAATCAAACCACTCCGATGACAACCGCAGAGTCAGAGAGAAA[C/G]GTTTCCACCG
RM20090700768_58AG	GCAGTGGCGGCAGAGGATCCGTCTACACCTGGAGGGCACAGGGATCAATCCCACCCC[A/G]GTGAACCTACATGAACAGCAGCT
RM20090700769_56AG	CATCCTGACATGACCCTCCAGCAAGAACTGGCAAATCTGGTGCAGTCCATGAGGA[A/G]GAGATGCACTGCACTTAATGCAGCT
RM20090700771_56AG	ATTTACGAAGGCGACGTTGTTTCTAGCTCTCGCTTTGAAAAAGGCAGGAGTTTAG[A/G]GACCGCATTCAGGTAAGAGGAGTTG
RM20090700772_24AG	TTGATTTAGTTGACTATACTATG[A/G]TCAGCACACAAGACAAAGATCATAATGGGTGATTTTGCATATACTTGGAAAGTAGAA
RM20090700773_52AC	GACTAGCAATATACACCGTCATAGTACGAATAAAGCTTCAAATGGAATAGA[A/C]GCTAACCCTGAGTAGATCTAGCTTGCTTC
RM20090700774_9AC	AATAAAGA[A/C]TGTGGTGCCGCAGGGAAGGAAGGAGAGACACATAGGTGTGTGAACCGGAAATTCACTTTCTACAGGCTCAGT
RM20090700775_57AT	TGATGTTCAGATGTACCGATCCTGTGAAGGTGTTGTTACACGTGGTCTGCCACTGC[A/T]AGGAAGATCAGCTGTCCATCCTGT
RM20090700776_33GT	CAGCGAACGGGAGGGTAATGTCATTTGTAATT[G/T]ATGAAATGTCTAGATTTTTCAGTTTTAGAATGAGTTGCTTATTAGGCT
RM20090700778_25AC	CTCAACCGTAACCATCGCCACAGC[A/C]TGGAGGTATTGCAGTCACACGCGGTCGGGTGCCACACAACTTTGTTTACCTCAACA
RM20090700779_33AC	GAGGAGAAGGCAGTGTGTGTGTTGAAAAAGAG[A/C]GTGAGTGTGTAGGTCCATGTTTGTACTTGGGAGAGTTATTGACTCTGA
RM20090700780_32AG	ACGTGCCTTATTAAACAGTTAGCTAAGACAC[A/G]AGAGAGACACGTCATGTGTGTTCCACACATCTCTTACCCCTTATCTGTA
RM20090700781_21AC	CATTGACATGACAATGCCAC[A/C]AGCCATACTACTCGTTCTGTGAGCAATTTCCGACAAGACAGGAATGTCAGTGTTCTGCCA
RM20090700784_37AT	CAACTACTCTCTCCATTTGCCTTAGAGAGTGTGCTG[A/T]GTCTGAGCCCAAACAGAACAGGGTTTAGAGGGTGTGCTGTGTCT
RM20090700785_79AG	GTATCGGCGTCCTCCAATGGCAGGATTCTAATAGCAGACAGCAATAACCAGTGTGTCCAGGTAAACACACACACACAC[A/G]CA
RM20090700786_25AT	GACTGCAAGCTAGATAAAATGTGA[A/T]ACATAAGACTACATATTGTAGAGACTGTATAAAATGTGATATCTCATAAGCATAGC
RM20090700787_33GT	GACTTCAGTTCTCATTTGAATGGTGTTTCCTC[G/T]GACAAATCGTTGCAGTTAAGCGGGCAGGTGTTAAGAAGCGCGGTTTGG
RM20090700788_53CG	GGATAAACTATTTTCATTAAAGTGAAGTGACTCTAGTGTGGGTATATAGATA[C/G]GACATAGGAGGATTTTTTTTTTCTTCTG
RM20090700789_60CT	CAGGTCTACCACATCTTATACCAACAGTAAAGACCCTTCCTTGTTTCCCTCTGTGTCCC[C/T]AATGTACTCAAAATGTCTTGG
RM20090700791_21AG	GAGTCCAGGAGGGAGGATCC[A/G]CTGGGTTCAGATCCAGGGATGGCCAAAATCACAGACACCACTGTCATCACACCTTCAGTG
RM20090700792_18CT	CGCTTCCACCTGAGAGA[C/T]ATCTCATCCTGCAATGTCATGGAGGGCTACTGGATCCTTCATGAGCACCCCAACTACAGGGGT
RM20090700793_16CT	CATACCACTGCTCTG[C/T]GGGTCGTCTTTGAAGACTTCCTGGGACAGAGAGGGAAAGAGGGTGAAGGAGGCATCTTTCCAGCA
RM20090700795_71CG	CAGGGGAGCAGGCCTCTCTCCAGCCTGATTAATAATGAATGAAGCAGATCATCTATTGATCTCCTCTGGT[C/G]TGTGTGAGTG
RM20090700796_32AG	AGTCCTATTCTGGGGCCTCAGCACTGGAATC[A/G]CAGAAATGTCTTAGAGGATCACCTAAGGCTTGCAGGACATGGACAGAAA
RM20090700797_51AG	CATCCTAACATGACCCTCCAGCAACCAGCCATATTGCTCATTCTGTGCGT[A/G]ATTTCCTGCAAGACAGGAATGTCAGTTTTA
RM20090700798_81CT	TGCAGTGGTGTTAGCTCCTCATCATGGATGCCCTCTCATGTGGCTAAAGGGAGAACACAGACAACAACACAGTCAGAATT[C/T]
RM20090700799_76AG	GAAACAATGACAGCATTTGTGAATCTTAAATATCCAAAATATAATTTGACAAGGGGAGTTCTTCACTTGCACAAG[A/G]TGCCA
RM20090700800_45AT	CCCAGACCGGCACAAGGGGACGCTAGAGCGCGATGAGCCAAATT[A/T]ATCCCCCCTCGGCCAAACCCAGACGACTCTGGGCCA
RM20090700802_54CT	AGTAAACTGCGAGCGGCCTATCTCCTAGCTGTAAAGCTGGATACAACCAGGGC[C/T]GGGCCGCTGGTTCAGGAAGTCCTCCAG
RM20090700803_41CT	GTTAGAGGAGGTCTCCAAGCCCCCCAAACAGAGGTAGGCA[C/T]ACACACTCATATAGCCTATCTTTGTCCTAGCTTGCGATGC
RM20090700804_33GT	AGTGGGACCTGAAGGGAATCCAGGTAGACTAT[G/T]AAATGAGCTTCATTAATTCAGTAAGACACCAGTCTGTCTAAGTTGAAC
RM20090700805_68AG	AAAACAATTCACATCACATAGAAACACCAATTACTAACAATTCTGGTAGAATATTTTTGCAATCTTA[A/G]CCCATAATTATAA
RM20090700806_41GT	TGACTTCTCATGACACATTTTTCAGCAGTGGAAAAACATG[G/T]CCGCACCTACAACCACACGAATACACACAATCAAGCACAG
RM20090700808_54GT	TTGATGAAATCTCCGTGCCAAACACTTGGCACTGCTTGCGTAAGTAGGGTTCT[G/T]AAAAAAAATGTCCCGATTTGCATGACA
RM20090700809_70AC	ATTGGATAAGGAGGAAGTATGTTACACCAATGAAACACCTCACCCAACTTGGTGTAAAATCAATTTGCT[A/C]AATTTCAGCAG
RM20090700810_22CT	CATCCTGATATGTCCCTCCAG[C/T]ATGACAATTCTACTAGCCATATTGCTCGTTCTGTGCGTGATTTCCTGCAAGACAGGAAT
RM20090700811_12GT	AACCCCTTAGG[G/T]ATGGACAAACAGGACACGGTTTTAAAACACACCACTGGGCTTCAGATGGAAGGAAACCTCATCCCATCA
RM20090700812_27AC	CACAGTGAAACACCAAAAGGGCTCTG[A/C]GAGGAGGAGTCTCTGAGTCAAGTCATGATGCAGAGCACACACACATGAATATCC
RM20090700813_81CT	GTTTTTCTCACAGGTCTTATTACAGGGTAGAGATGAACTAGAAAATAAATAAGGCCAGGGATGTGTCCCAAATGGCACCC[C/T]
RM20090700814_15GT	TTCACAGTTGGCAA[G/T]CGTAGACTGGTAACTTTTATTATTTATTTGGCGCACGGAAACTAGAGGCCATGAATGACTTGATCC
RM20090700816_1CT	[C/T]GAAGTGGCTCCTCGTTCAGACAGCGAGGACAGTGGCTCAGAGGAAGAGGAGGTATGTACCTTACAGAGACCGCAATGCTG
RM20090700817_11CT	GACAGCGTGA[C/T]GGAGCTGGTCCAAGTCTGCTGGGTCTGTCATGGCCAGTTTGTACTATAAGGGCAGAATATATTCAGACGG
RM20090700818_43AG	TTTATTTACCCTGACAGAAATGTAAAAATTCTCTTTTCCTAT[A/G]TGGCTGAAACCATGTCAGTATGTTCAATATACTGAATG
RM20090700819_60GT	TCTAGTTCCTGTTCCTGTCTCCCCCGCATGCCTCGTTACTCAAGCCCACTGGAGCGTGA[G/T]TCTCAACAGCAGGCGCAGTCA
RM20090700820_65CT	GGAGCGGGAGGCCCTGGAGACCAGCCTGTTTGAGGAGCAGCAGCAGCTGGTGCAGCTGGAGTCT[C/T]GCAGAGAGCAGCTGGA
RM20090700822_38AC	TCTTGCAGGAATTGTCATGTTTGTGCAGAATTTTCAA[A/C]ATTTCTGCAGGACAAGTCATACCACTGCAGGATTTTGTCAATT
RM20090700823_2AC	G[A/C]TAGCTTTTCCTTTCTTTTTCCTTTACTGGTGAGGTAATGTAATGGTCGTTCTTAGAAAAGTTCAGCAGTGATGACGGCC
RM20090700827_70AT	TCAAAGGGGACAGGGTGAGTAATGTCACATAAAACAACATTAGTCGACATTCACAGACACTACATTATG[A/T]CAGTGATAAGG
RM20090700828_36CT	CTATGTCTGAACCAGATACACAAGGGGCCTCCTAC[C/T]CCAACGAGCAGGGAGAGCAGGGGTAAGGCCTCATCCTACCTCCTT
RM20090700829_38CT	GGGTACCACATGAGGGAGGAGGATATCTTCCCTTTAA[C/T]GCGCAGCGTTGCGATTGCCTGCAATGCCCCAGACCATGACGGA
RM20090700832_10CT	AAGAGCTCC[C/T]GTGACATGGCCAGTTTCAAATGGACTGTGGGGCGGCAAAGCACCCTCTTGAGCTGTACATTAGGCTTTTAT
RM20090700833_9AC	AAAGTGTG[A/C]GCGTCAGGAAATGAGATGTAGAGGACAGACATTGATAATGAAGCACATCACTTCTTTGGGGGTTCAAATGAA
RM20090700834_81GT	CTCACCCACTCTGCCACGCGGTCCTCTCTCTCTGTCGCAAAACACACCCAGCAGTGCCTGGACATACACACACAGTGGGA[G/T]
RM20090700835_64AG	GGGTACCACATAGGGAAGGAGGATGTCTTTCCTGTAACGCACAGCGTTGAGATTGCCTGCAAT[A/G]ACAACGAGCTCAGGCCG
RM20090700836_2GT	C[G/T]TTATATCAACAATTTACCCAATAAGATGTCTTTAAGCAAAGTTCTGAACTAAAATGGCTCGGTTGAACTTGAACGAATC
RM20090700839_73AG	CAGACATACAGCTCCACACAACAGGTGGAGAGACAGAGAAAGGAGGAGGAGAGAAAGGAGAAAAATATTAAT[A/G]GAGGGATA
RM20090700840_26AG	AGCAATTGCTGACAAGATGGTTGCT[A/G]CTGTCAGGGGGAGGGTAGATGTATTAAAATGTTGTTGCCAGGGAAACTCACGCAA
RM20090700841_56AG	TGAAATATGCTTTCTCTCTTTGTTTACAGAGGTGCTATCCTCAGATAACAGCATC[A/G]TTATTTTCACTTCCTACGCCTTCCA
RM20090700842_5AG	TTCT[A/G]ACACAATGATGAATTGTGTCAGAACGTTGATACTCAACAATGTTTGCCAGTACACACAGTTCGAGAGAGAGAATTA
RM20090700843_39AC	AACCATGGTCACCAGAAGAGCGAGGGCTCCTACCACCA[A/C]CAAATAGAATGCCTATGATCATTCTCTATCCCCTCCCCCTTT
RM20090700844_32AC	GTTACAAAATGAACCTTTTCAGTTGTCAGTA[A/C]ATCTATGTGAGGCTATTATTTGTATTGACTTTCAGAGGCATTGATTAAA
RM20090700848_41AG	AAATCCCGGAACAGCACACCTGTATGTTACGCACTGGGCA[A/G]AGCACTAGCACCGACGGCAATAACAGGTGAACGCTCCATC
RM20090700850_44AG	ACAGGAGATCGATCAGAGAGATCAAACAACAAAGATACAGAAC[A/G]TGTGTGTGCTGCTCTCCTCACCAGCCTCCATGTCACA
RM20090700852_42AG	AGACGGAAGCTGGGTCGGATCAATCAGGAAAGTAATCTGGA[A/G]CACCTTGCGCCGCACCCGCCTGACTCCACCAACATCGAT
RM20090700853_5AG	ACTC[A/G]ATTTCCTCTGGTGTGTGGGTCTTCTCCCCATTCTGCAAACACAACCAACAACGCCTGAGAAACCTGGACACCTTCT
RM20090700855_53CT	GACACAGGTTTGGGTAGTACCACTCCTGCCGTGTAGACGGCCTGGAATATAC[C/T]CTCCAAGTTAACCCTTCGTGTGATCTCC
RM20090700856_4AG	CGG[A/G]TTTTTTCGTTGTTGGAAAGAGGGATGGGAGATTATGTCCCTTTATCGATTACCGGGGTTTAAATAACATTACCATCG
RM20090700857_1AG	[A/G]GTTATGAATGATTCGTTACCATAGAAATGTACCTGGCTAAAAGGGGAGCCACTTTCTTGGTACCGGTTTTCCCGAGTTGA
RM20090700859_7GT	TACAAG[G/T]ATAGATTGAGGCATTTAAATACAGAAGAAATTGGAATTAAATTTAGAGCCGAGCTGTCTAGCCTGAACTGTAGC
RM20090700860_64AG	TGACAGCGGTTGCTTCATGGTTTACGATCGTAACAACTACATGGGAAACCAGTACTTCATGAG[A/G]AGAGGCGAGTACCCTGA
RM20090700861_12AC	ACATTAACATT[A/C]TAGTCACACTGTAGAGTCAGGGGCATATATTTAACACAAACTATTTAAAATAGGCTACTAAAATCAAAT
RM20090700862_51CT	TTGGATTATGTTTATGACACCAACATTACTTATCTGATTAGACGTTTACA[C/T]TGAATTGGCCTTGTTGCAGACCAGGCTTCC
RM20090700863_70AT	AGTCAGCATGTGGTCAGCTGTTGGTAGCTGTGGTTCTGTTTGACCAGATGTCTGATTTATTTGTAAATA[A/T]TCAGTAATTTT
RM20090700864_78CT	GTCTTGAGAAGAGCCGACCGGGCTCTCTTCCAGGTATGGCGATAGCAGAGGACAAACATCTGGACAGAGGGTATGCC[C/T]ACC
RM20090700866_46AG	AGAAGGGATGTGATGGAGAAAGGGTGACAGTGGTGGGCAAACTAC[A/G]ACCCGCAGGCCCTTTCTATCGGGCCCACGGGAGGT
RM20090700867_26AT	CATCCTGACATGACCCTCCAGCATG[A/T]CAATGCCACCAGGAATGTCAATGTTCTGCCATGGCCAGCGAAGAGCCAGGATCTA
RM20090700868_67AG	TGATGCTTCTGTGCTTCAGTCTTACTTTAGTGAGCTGATGTAGTTTCCCCATCCTTCTGTTTAATG[A/G]TGTGATCAAGTAAA
RM20090700869_27AG	TTGTCTAGTTTCCGGTTTGTTCCAGG[A/G]ACTTCCCCAAGGGATTTCTTTTAAATACGTTCTTAGAACATTGTGTCATGGTCC
RM20090700871_9CT	GCATTTTG[C/T]CTTTTGGTAGGCCATTGTAAAAAATAATTTACACTCCAGGACCTTGAGATGCTTCTTACGGAGCCAGTCCTT
RM20090700872_70CT	GCCTTTTGGTCCTCACCACCACCTGTTATCTCTAAACACTGTTGTAATCTCCACCCATTCCTGGCAAGC[C/T]GGAGCGCCAAG
RM20090700873_52CT	TCCTCGTCCACTCAGGACGACTCTGCCTATCTTCTCTGGATCCCTATCGCC[C/T]GTGGTCCAATGAGAATATTATTTTCAAAG
RM20090700874_57AG	GCAGTGTTGCAAAGTTAAGCTGCCTATTTTCATTGAATAACACACTTCATCAATGT[A/G]TCATCTCTAGGTAGCCTCAAAACA
RM20090700875_68CT	GGGTACCACACGAGGGAGGAGGATGTCTTCCCTGTAACGCATAGTTGTTGTTGCCATCCTGTACCTG[C/T]CCCGCAGGTGTGA
RM20090700876_43AT	GAACGTCACCAGGTGCTGCACAGGGAAGTGAAATAAAGAAAA[A/T]AGATCTTCCTAGGTCTGTATGTTAATTACATGGGTATA
RM20090700879_68CT	CTGGGCTTCCATGAGGGCAACTTGAGGGACCGCTCGGCCCTGGAAGTGTACCGCTCGCTGACCCCCT[C/T]GGCCCGAGGAGAC
RM20090700880_24CT	CTGTTACAGATGGTGGTTAGCCC[C/T]AGGGGCAGCTCAACACAGGGTGTCATCGTCTCTGTATCCACCGCTGGTAGGTCTCAG
RM20090700881_75CT	GAGGACTGAGTGAGAGGGGGGAGGAGAGCAAGAGGCTCAGGAAGAGAGATGGCCTGTGTGCAATTCCGTTCCTG[C/T]TGTCAT
RM20090700882_25AG	GCCCAGGAAGGCCTCAAAGGGGAA[A/G]TGGAGGCGCGGGTCGGACAGCGCCGGAATAAAGAAGTGAAAGATCTGCTCCGTGAA
RM20090700883_12AG	GCGAGGGAAAT[A/G]GGGAGGAAAGCTGTTCAGCGCATGAGTCACAAGAGCTCACCTCCTTTCTTTCTCTCGCATTCTCTCCCC
RM20090700884_65CT	AAAGTTCAGAGACAGTCAAAATGGATCACTTGTATGTTCTGTGCACTACTGTAAAATCCCTCCC[C/T]GATAATAATACTCCAT
RM20090700885_45AG	GGTTTAAAACGTAGCAAGGGGCTGCAGATCACGCCACTGGAGGA[A/G]GAACCTGTCAAGGTAACACAGCTTCTTTACATCAAC
RM20090700886_62AG	ATTCGTGCCAGTCCTAGCCCCTCCAGAGGGCAGCCTCTGGGCCAGACAGAGGGTGAGGGGA[A/G]CGATATGGGGGGGTCCAGG
RM20090700887_11AG	GGATTAGCAT[A/G]TGAGAACATTTGCAATAGCAGCCTGAAGTGGAGCTGCCTGTCAGGGCATGTGCCCCCTGTTTCTCCGCCT
RM20090700889_29AG	GACAGGCAGGCTCAGAGACAGGCAGTTA[A/G]CTGACACTAGTCCTGCTTCAGGGGATTTCCTTCAAGGGATTTCCTTTCACAT
RM20090700890_17CT	GGAGTTGTCAACCTCC[C/T]GTGAACGCTGCAGAGCTTCCTGCATACAGTCCACCAGGTCCTGTTCCAGGGGTCCTGTACCCAG
RM20090700891_13CG	AGGCTTTTGTTC[C/G]AGCCTAGCACTAAATCATAACAAACTATTAACAACATTTTTCGTTAATGTTGGACTGGAACAAAATCT
RM20090700892_61CT	ATCACCTCTCTGAACATGGGGACCAACGCTCTGCCAGACCCCTGGATGCACATCTCAGAG[C/T]CTCAGGTACACTCACTGGCT
RM20090700893_72CT	AAGGGCTTCATGGCTGGCATCGTCAAGCCCTTTACCAGCTCTGTGGGCCAATCAGGGATCCGCTTCGGGGC[C/T]GTGCAGTAC
RM20090700894_57AT	GTTCCAACCACTGAGTTGGCTATGGCCTCACATAATCTAAATTGATATAGGGAGGG[A/T]TTCACACATGCACATATGCACTCA
RM20090700895_13GT	TCTGGGCCAGGA[G/T]TCAGCACTAGATCAGGTTACATCAAATGGGAGCTGGGAGGGATCAATTTACTGTCTTGGGGACACTGG
RM20090700896_16GT	CGAGAAAGAGCGAGA[G/T]AATCTAGAGCCTACATGGGGAGAAGGGGGCGGGAGAGGGGTAGTAGGAAAGATGGGAGAGCGAGG
RM20090700897_66CT	AAGTGTGGCAAACAAATTAGTATAATGTGGGTAAATGCCAATTCCAGCAATCAAATACACACAAC[C/T]GTAAAGGCTCCTACT
RM20090700899_7GT	GCTGGG[G/T]TCTGTTTGTGTTTCCCTACTGTATCAGCATTTTCTCTCTGACTCTCTCTCTCTCTAACCGCCTTGCTCAAGAGC
RM20090700900_53GT	GTGAGCAGCCACGCATGCCTATAAGGCAAAGACTCTGCAGCTTGCAGCAACA[G/T]ATTTGGCTGTTCTAAACAGCAAATGTAA
RM20090700901_62CT	GGCTATCTGGGCCTGGAGGAAAGAAGAGCGAAAAGGTCAATTTCCTGAAGAAAAATGTGTG[C/T]GTTTGCATCTTTTTATGGC
RM20090700902_2AG	A[A/G]GAAATTCAGTGTTCTGCCATGGCCAGCTAAGATCCCGGATCTCAATCCCATTGAGCATGTCTAGGACCTGTTGGATCGG
RM20090700903_24CT	GTGCAATCTCTACCGCAGACCTC[C/T]GAGGTTGCCAGATCCTTGAAACTCTCCATCCGAAGGTTGCCAGACCCCAGTAACCCC
RM20090700904_51AG	CCTGTCAAGCCCTGACTGAACACCTCTCCCCCTGTTCTTCCCTTATCTGT[A/G]GAGCAGCCTCTTTCCACAGTCGCCTGCCGT
RM20090700905_10AG	GATGACACG[A/G]GGCAGGCTGCTTCGACTTCAGACAATGAGCGTGGCAGAACCTGCTCCAACCCTTGATAGAACCAGTCCAGA
RM20090700906_32AC	TATGGTCATACCACGAAGTAAAGGATGGACA[A/C]ATTGGCAGTATATATGTAGGCCTTAGACATATGTGTGATCCCCTATTAT
RM20090700908_20AG	ACAGAAAGAGCTATATGAA[A/G]ACATCTCTCTTATTTGATTAGTATCATTTTTATTCCACAGTTTTAAAATACATAAAATGTT
RM20090700910_65CG	AGTACAAATATGACATTCGCATTTTCTTTGTTTTTGTTTTTTCTTCCAGTCCACAAGTACGGCA[C/G]CAAGCATGTTATCAAC
RM20090700912_49GT	TAGAGGCACATCTTGTTAATGAAGTCTCTGTTCCCGAAGATTTAAAAT[G/T]TATTTTGAGGTATTGAATAGCTATGTTACATT
RM20090700913_72CT	TGCAAAAACATGTGTCCAAAATGGACAAAGTGATTAAACACCATATCTACTTTCAAGAGTAAAGTTAAATA[C/T]AACTAGGAA
RM20090700914_5CG	ATAA[C/G]AGTAATGCCACGGTCAGGGATTCATCGACCGATGATACGTTTTCTTTGGATCAAAGTTATGTGGAAATGCTTTATG
RM20090700915_40AG	GACCTATCATCCTATAGAGAGGGGAAAGAGAGGGGGAGA[A/G]AATGGGAACTTACCAAGGGGGTTATTCACCTGAATACAATA
RM20090700916_52AG	ATGTTGCTGTTTGGGAGCTACAAATACGTTAATCTGTCTTGTATCGGCGAT[A/G]TCAAACACTTGTTTTATGTGTTCAGCTTG
RM20090700918_3AG	AA[A/G]TGCATGCGGCGCCTCCGTGCGGCGTTGCGTTGCCTGGTGCTGACCCTGCGACGCTCCTCGTCCTCAGAGCTGGTGGAG
RM20090700920_73AG	CAATCAGGTAAGAAATAGAGTGAGGAAGGAGGGAAACAGTATGAGAACATTCCTTAGTAAAATGGCAAACAA[A/G]TAGAGCTT
RM20090700921_52AG	AGCATGTGTGAATGTTAATGGCCCTTGTTCACTATGGAAGAAGGTTATAGG[A/G]TTGTGAATGATGGAAATGATCTATTATAT
RM20090700922_52AG	GCGGCAGTTCAAGGCGTCGTCGATGGACTCGGCCAGAGACTTGACCTGCCT[A/G]GAGAAGGCGTCCTCCAGCTCTGTGATGGC
RM20090700923_61AG	TGTCCTAGAGCCAGTAGAGTAGCCTGGAGCCAGCTAGGGAGCCATGGGTCATGGCCACAT[A/G]CAGGGGGTAATAGAGGCCAG
RM20090700924_38CT	CTCCTGGCTGGCTGAGTTAGTACTGTATAGCTTATTT[C/T]AGCCAATGCAAACACAACACTATTTAGGATATCTAGTTTATTC
RM20090700925_16AC	GCTCAGGAACTTGGT[A/C]TTCCAGACCAGAAAGTCAGCATGCACGCTGCCATTGTGGCTATTCGCTACGTTGCAGTTGCCATC
RM20090700926_77CT	TGAAATGTTCTCTCTTTTCTTTACTATGGTGCTATGCTCAGCATCAATTGCTTTCGCCGAAAAGCCTATTTGAAAT[C/T]TGAC
RM20090700927_59AG	CAGGCATGGATCAAAGCTGAATAAATATTGTACTGCTGTTTTGAGTTAGAAATGTAAC[A/G]CTTTAAAGTACTTAAGCATCGA
RM20090700928_18AC	CCTGTCCTAATGGATAC[A/C]CTGAACCCCAGAAGTCCTTGTCTGGCTTTCTTTGCTGAAGACAACCAATGGTATCGAGCTCAG
RM20090700930_52GT	TGAGTCAATGCTTTGATAACCATATGTAAATGAAGAATTTATATAAGAGAT[G/T]TACCATTACAGGAACACAGAGACATATTT
RM20090700931_55CT	AACTATTGACAATTGCTTCGAGGACGCAAACCTGTAATGACCCACTATCTGGTT[C/T]GATTGTTGTAAGTGGTTTTCAACCTT
RM20090700932_36AC	TGTAGCAGACTGACTAGTGCCAGGATTGAACCCAG[A/C]CATGAATATAACTGTGTGCTCTTCAGCGCTGTTGACTCGTGCTTA
RM20090700933_2AT	C[A/T]GCTTCTCTCTGAGACCGGCATCACCTTTGACCCCACAGGAATGGGCAAGCCTGGTAATAAAAACAAAGCCCTTTGTCCG
RM20090700936_77CT	TGTGAGGTCATCATCAGACAGCTCTGTAAAAACAACAACTTGCAGTCCCAGGAGGTAGGCTACAGAGAGGACCCTA[C/T]TGTA
RM20090700937_10AC	AAATTTGTT[A/C]AACACAATCTAATACCATGAGGCGTTACAAGGCGCGGAGGCTGACAGATTTGTTGCAGTGCGAGTTAATCT
RM20090700938_60AC	CAGGCATGGATCGAAGCTGGCGAGATAATCAATAACGTCATCTCCACAGACGAATCAAC[A/C]GTGGCCCTTGAGTAATTTGCT
RM20090700939_53AT	GGAACCAAAGCACATCACAACCATGAATAATATAAAGATGAGCGAATACTAT[A/T]ATGATCTGTAATGCAGTGTTTTTGAGCT
RM20090700940_25AG	CTGCTGGAGCAGCTGGACGTCTGT[A/G]GTGCCTGTGACCTCCCTCAGCTGGTTCAGTAGAGTCTGCTGGTGCTGTCAGGAGCG
RM20090700941_8CT	AATATTG[C/T]CAATTTGTGTGTGCAATGCCAACTCTGCAATACACTGACTACAACCAGTTCTGTAATAGGACATTACTCCTTT
RM20090700942_81CG	AGGTACAGGGTGGCAACTGCCCGAGTTACACCAAGAACGCACAATCCCTTCATCGGTGCAGACTGTCCACAATAGGCTGA[C/G]
RM20090700943_44CG	ATACTGTAGCCATGACTCTAGGGGCGAAAGGTCGTATTTGGAC[C/G]TAACGTCACCTTAGAATCCCCCGGAACGAACGAGTGG
RM20090700946_75CT	GATGACAACCTGATGTCGTATTTTCATGACGACGCCAGAACACTGTACGAAGTTTTCCAGAGGGGACTACAAGT[C/T]TCAGGT
RM20090700948_19GT	TATAATGTTGTCTTCGGC[G/T]CCAGAGATGCGTACCTCAGCCTGAGAGATTTGCCCAGCACATTCTTTGACTTCCTTAACGTT
RM20090700949_47AG	AGGGGCTCTATACAGTACTGCTATGGGACTGAGGGGTAGGGGATAG[A/G]CTATGGTGGAAAGGGAGTAGGGGTAGAGAATGTA
RM20090700950_5CG	TCGT[C/G]TAGGTGCTGAGTGTAATACCGGTTCCCGGACTCCCAGCGAATGAACGTGACACTGCAGGATAGAAGGGCAGTAATA
RM20090700951_41GT	GTCCTGTAGCTGACTGAACAATCTGACTGTGGAACTGTCT[G/T]TATGAAAAGCGTGCGTTTATATTGTGGGTTTGAGTTGTGA
RM20090700952_16AG	CACCAATCACCAGTC[A/G]TTCCAGGACATTGTGAATGAGCTGAATGACTATGCGGGCCAGAGAGAGCTGATAGCAGAGAACAT
RM20090700953_56AG	TCCAGGGGTTCTTGTGTTTGGCAATTATGGTTACATGGCCTCTGTGAGAGACCTC[A/G]CTTTGTTCTGCTCTGCCAACACAGA
RM20090700954_16GT	TTAAATAACTAACTT[G/T]TTCCAGTTAACACGCTGGTATCATAACAGTGGTAGACCCAGACCACTCACTCTTTCCCGCTACAT
RM20090700955_4CG	GTT[C/G]TTTTGGCCTTTTCTATAATTTCCCTGTTAGTCGGAGTTGATCCAAGGTCAGTTATTGTTGGAACTCTGCATTGTTCT
RM20090700956_17AC	CTGACAGATAAGGAGA[A/C]GATAGAGGGAGGGAGAGAGAAGAGCTCTTACCCTTTCCTTTCAAACACTAACCTGACTCAGGGG
RM20090700957_9CT	GAGAAATA[C/T]GGATGTCAAAAAATTTGGAGATTGAATGGTCTTCTTGTCCAAGGAATGAGCCACCCGCATGGCTGTCAATAT
RM20090700959_8CG	AATGGTA[C/G]TGTAATTGCTTCAATGTTACTTTGCTTTGAGTGGCCCTACATGAGAAACATTCTGTTCAGCTTGAAAGATAGA
RM20090700960_11AG	GTAAGTGCTC[A/G]AAGGTGAGAAGCCATTTTATGTCACAGCCACTCATATGTGTCTCACCTGTATTATACATGTCCAAGGCTT
RM20090700962_70GT	AAGGCACGAACACTGGCTGGGAATCTTTCAACCACAACGTCCAACATCGACATGGGTGGATGTAAGCTT[G/T]AGTTATCTTGT
RM20090700964_1AC	[A/C]ACAGCATAGGCACTCATTACAAATACCACACAAACATGGATGATCCTGAAAGTAAAAGACAGAGGTGGTATATACACTAT
RM20090700965_31AG	CACAGCCTTCTTCAGGTTGCCGTTCTCTCC[A/G]TCCATGTACGCCACGCTGTTCTTGCAGTGGTATGTGATGTTCTGGGTAGC
RM20090700967_58CT	CCCGGACACTTCTGAGAATGGCCTTAACCATAACCCTCCGAGCCAACAAGTCCCAGA[C/T]GTTCAGAGCCGGGCTCGTCACTG
RM20090700968_46CT	GACTGCGTGGCGGAACTGGTCCAAGTCTGCTGGGTCTGTCACAGC[C/T]AGTTCGTACTATCAAGACACAAGGCTAGACCCAGA
RM20090700970_50AT	ACGAGGACTGCCCTGTGAGCGCAGAAGCGCTGACCGTCAATCTGGATTG[A/T]GACATCCGTCAGGATATTTCTACTGCGGAGG
RM20090700971_51AC	TTAGCGCCGGGAGTCTAATGCTAGCAGCTATCCTCTCCTCCGTCTTCTCA[A/C]CAAACAAACACCAGAAATACTGGCTGGAAC
RM20090700972_5AT	TTGG[A/T]AGTGGGCCGTGCAGTGTAGTGGGCCGTGCATCGTGCACTCACCGATGCACTTGCTAATAAACTTGGTGCTAGCTCA
RM20090700973_37CT	GACAAGAGGAGCAAAACAACAGAGACAATAGAGAAG[C/T]GGAGACACTGGAAGACGACCTCTCAAACCCTGGGTAAAGATGTG
RM20090700974_32CT	CTGGTCAAGTACTATACCCGTGAGTTAAAAA[C/T]GACCACGAACATCAAGGTTATATATTTGAGGTTAAAGTTCATATGACCA
RM20090700975_43CG	ACGTCTTCCCAGTCTCTCTGCCTGATGGATGGCCGTTTATGC[C/G]TTCCTTCTCTCCGAGCCTGAGTGAGAGTGAAAATGGAA
RM20090700976_77AT	AAGGAGCCTGACCTGGAGTGTGAGTACTGTCTCTACAACCTGCTCCATCCTCCAAAGACAACCATTTATTCAACGC[A/T]AACC
RM20090700977_75AG	GACAGTTAGTACACTGTTACGTGTTGATATATCAAAGCTGGAGATATCAAAACTATTACCTAAAACAGCCAAGT[A/G]ACATGT
RM20090700978_69AT	GAGAAATATAGATGCCAACATTTTTTGAAATTGCATGGTTTTCTTGCCCAAGTAATGAGCCACCCCGC[A/T]TGGCTGCCAATG
RM20090700980_22CT	GCCAATCTGTTTGCTGAAGCT[C/T]GCCTGATGGTCTCCCACAACTAGGCATCTTCTGGAGGGTCAGAGGAGAGCAACTTGACT
RM20090700981_77CT	AGGCTGCCAGCAGAGAGAGAGTGAGAGAGCGAGTGGGGTATGCAGAAGGACTTAGGGCTGGATTCAATCCGTAGCG[C/T]TGAA
RM20090700983_80CT	CTGAGCTGAGGCTGTGAGGCCATTCGTAGTTCTCTCACGTCTCACACCTCCACAACCACAGAAACCCCGGAGATTTGTA[C/T]C
RM20090700985_65CT	CACACAAGTAGAGTTCAGTGAGTTCCTGTGAAGTCATAAAAATGACAGTCCACAGTAACAAACA[C/T]CAGTCTCCTGATGAGC
RM20090700988_66AG	GCTCCTGGTCATCTCTTGCTGAGACTGTCAGCTTCTGTCAGCTTCCGTTCACCAGCCCGATCAGT[A/G]ACCCGTGCTCAATCC
RM20090700989_76CG	GAACCGCCCCTGCACTGCAGAGGAGGGGCCGTGACACTTAGTGGTTGTTGTAGGTGTCAGTTTGTATGTATCTTC[C/G]TATTT
RM20090700990_26CT	GCCCAGGCGGCAGAGGAAGCTCATG[C/T]CCAGGCCACACCACCCCTCAGGGTACTCGGCCAGGCTGTAAAGCAGGATGCCTGT
RM20090700991_62AG	GAAACAGGTAGACAGGGGATGCCAGGGGAGAAGGGAGACATCGGGGTAGATGTGAGTACCT[A/G]TGAACACACACACACTGTT
RM20090700992_1AC	[A/C]TCACTGGGTGATGAGCTCTTTAGGAGAATCTGACTCTGTCTGTTCAGCTTCTTCTGCTCAACCAGCATCTGCATGGGAGG
RM20090700993_67AG	GCGATGTTTCTGTGTTTGCTTTATGTAGGTTATTTTTAGATTTGTATCATTTAGCTTAACCAAAAT[A/G]TACAGTGCCTTGCG
RM20090700994_5AG	AACA[A/G]CACACAGGCATCATAAACATAACCTTCTTTCATCATAACCAGAACCTTCATTTCACTGTAACTAGTTGAATGCTAA
RM20090700995_75AT	CACTGCTCTAAATCACATTCTAATTCAACAACTACAGAAATGTTGCATTGGTATAAGAGAATCCAGTTCCTTCA[A/T]TTTGAA
RM20090700996_65AC	TTCTCTGATCTAAGGATTTCAGGGCTTCATGTACCACCTGCACTGAGAATGGCAAAAAATAACA[A/C]ATTTGACCAGCTCTCA
RM20090700998_68AC	GCCACTATTGGGAGGCAATGAGGAGCTACTGCTGGACCTTTTGGAAGGGCTTCATTCCCTGACGGAA[A/C]GCCACGACCAAGG
RM20090700999_71AG	GAGTCACAGGACCCAACTCAATCAAACCTGCATTCCAGTATTTACACACCGAGCTCTTTTTCACATTGTC[A/G]AAAAACAGTT
RM20090701000_81AG	CCTTTCTGTGATGAGATGTGGTAGGTGATCTTTGTTTCATCCGCACATCCGTCTGACATTCTGAAATGGTGTTATCAAGT[A/G]
RM20090701001_73CG	AGCAGGCAGCAGCCACATACACAGGAAGCATTTACTCTGTGAAGAACACACTGCTGATACATATAGCCATGA[C/G]TAATGCAG
RM20090701002_49CT	ACCGATGAGTTTCCTAACACTCTACTAACGGGAGGTTCCGTGGAGCTC[C/T]GAGCTAAAAATCAACCTGATTGCGAATAAACT
RM20090701003_10AC	TACACCACC[A/C]CATCTGGTTTGCGCTTAGTGGGACTATCATTTGTTTTTTCAACGGGACAATGACCCAACACACCTCTAGGC
RM20090701005_80GT	AAACCTTCTAACCCAGGCCTTTAGAAAGAGACAAGGAGAGGAGGGGCAGAGGTGTTGGAGGCAAATCAGAGGAATTAAC[G/T]G
RM20090701007_60CT	GGGTACCACATGAGGGAAGAGGATGTCTTCCCTGTAACACACAGCGTTGCCTGCAATGA[C/T]GACAAGCTTAGTCCAATGATG
RM20090701008_41AT	AACAGAAAGCTACGTGACTGTTCACTACACCACACACGGC[A/T]GGACCTCCAGGGTAACAGAAAGCTACGTGACTGTGACTGT
RM20090701009_52CT	TGGTCCAGTGGGGTTGGTAACAATCATGGTTACATGTACCAATCCTGGTTA[C/T]AGGTACCAATCCTGGTTATAGGTACCAAT
RM20090701010_39CG	TGCATGAACGGATAGAGAGAAGAGAGGGATGAACGGAA[C/G]TGAAGAAAAACATGCTCCTGACACCGTTACACCTAGCAATTG
RM20090701011_33CT	CATCCTGACATGACCCTCCAGCATGACAATGC[C/T]ACCAGCCATATTGCTCATTCTGTGTGTGATTTCCTGCAACATGGCAGC
RM20090701012_49CT	TCATGGATTAAACCCCTTATTAAAACACACCCTTTCCACATTGGCATG[C/T]TGTATTACAACTACTGGTGTCTTCTATGGAGA
RM20090701013_12GT	TACAAAGCCTC[G/T]GTTGTAGCGCTGGGTCTTCAATGAGGAGATGTAGGGGTCCTTCACCCAGAAAGGGTTGCGGGAGCGGTC
RM20090701015_27GT	GGAAATGCGAGTTGGGGTGAGCTGGG[G/T]GGTGGCTCCGCCGCGGCTGGTTCGTTTCTGACCCGTTTCCATAGTGGACATCCA
RM20090701019_18GT	AAAAGTCTTTGGGAAAT[G/T]AATCCTTATTAGTGACATAAAGGCAGGAGACAGAGGACAGGTCTGGCTATGACTTCTACCTCT
RM20090701020_74AC	GGCAACGTGAAAGCTTTCGGTCAATGCAATGAAGAACGCTCTCAAATCAAAGTGCTCCTTTATCAAATGTAAA[A/C]GCATGAT
RM20090701021_60AG	CTGGGCTGGATCCGGAACGGGGAGTCCATGCTGAACGCCAGCATGGTGAATGCCAGCTC[A/G]CTGTCAGAGGCAGAGCAACTC
RM20090701022_19CG	GCAACAACAGCTTGAGGA[C/G]CATCTGTCTTCCCTGTTTGATATGGAGGGGTTTTAAAATCCGAAGCTTGTTCGTGGTTCAAT
RM20090701024_6AG	TCTCA[A/G]GGGTCTGAGCTGAGGGTGTTTTTAGGGTGAGCCTTTGTAGTAATCAGTGTTCACATGACTGTAGTGTGATGTAAG
RM20090701025_75CT	AAATCCGCTATGCTGCTGTCACACAGTTCGAGGTACAGTAACTAGGCGCTCCTCCTGTCCTGCATTACTTCTGT[C/T]ACCATA
RM20090701026_27GT	TCCTTTCTGCTCTATGTATTTATACA[G/T]AGTCTGCAACTGACAGGGAGAGACAGAAAACATCAGACACAGAAAATACATTCT
RM20090701027_74GT	CCTCATGAACTCTGACCTCTCACTGTTCACATGCAGCAACAGAGTCTGATCGGCATAGATAAACAGGGTTAGT[G/T]CTAGGTC
RM20090701028_31AG	AGTGAAAAGTCATTAGTAAGTGACTGAAAC[A/G]ACTTCAGGCCCTAAAGCACAGGCAGGCCTGCATTTTAAATGGATGACATC
RM20090701030_2AG	G[A/G]GCTGGAGGAGCTGAGGATCTCCTCGCGGCGCATGGAGCAGCTAGGTCAGGAGAAGCAGACCCTGGAGCAGGAGGCTTCT
RM20090701031_50AT	CAGAACCCGCCCTGTGTAAGTTCCCTGTGGAGAGAAGAGACAAGCAGGT[A/T]GGGGTCACTTACTGTACTGACCACTGCCAAA
RM20090701032_11CT	GTGGTCTGAA[C/T]GGAGGCAGTGGCTCCTGGGAAACAAGTTTACTAACTAAGGTCTCAATTCAATCAATCATAGATAAAGGAA
RM20090701033_45AC	TATTTTCATGGTTAGTTCCTAGGATAATGTAACTCATACATTTA[A/C]ATCTTTCAATACTTCTAAAATGGGGTACAGGTTTAA
RM20090701034_45AG	TCCACATACTTTTGGTCAAGTAGTGTATGTTAAGGTTGTAAAGT[A/G]CAATAAAGAATATTAGCATTATATTCTGCATATTGT
RM20090701035_47AC	GGTTTAAGACAGACATCAGCAATTGGATACACCTCTCCTTTACAAG[A/C]TTTTAACTGACCCTAAAGTGTATCATGAAGATTC
RM20090701036_68CT	AGCACATGGAAATAACATTTGATTTGAAGGGTACCTACATAAGGACTGGAAGAATGAAGAAGATAAG[C/T]GTTTCATAAATGT
RM20090701037_21CT	TCTATGAACACGGTAGGGCA[C/T]AGGCTGCTGTCCATGTGACAGGGTGACACCACTCTGCACCTCCCCAAACCCTATTTCTAT
RM20090701038_17CG	ATATCTTTCATCTGTT[C/G]ATAGAAATGACATACAAATTCAAAGTCAAACAACCAAGCAAGATCTTCCCTTGTCTTAAGAATC
RM20090701039_81CT	GCCGAGTCTGAGGGAGCCACGGCTTTCCTGAAGGCTGCGGAGGCCGTCGATGATGTTCCGTTCGGCATCACCTCCAACGA[C/T]
RM20090701040_68GT	TGAAATATGCTTTTCTCTCTTTGTTTACGATGGTGCTATCCTCATAATAGCATCGTTTGCTTTCGCC[G/T]AAAATACTTTTTG
RM20090701041_8AG	AGACAAG[A/G]CAGCGGTACGAGGCAGACCTGTAGCAGACATACCCAGTAGTTTCTTCCAGGACTTGATGAGTGACTTGGCCAG
RM20090701042_30AC	GCGCACATGGAAAGAGACATCTGTGTATT[A/C]ATGGAAGCCAAATGAAGCCATGCTTCCCCAAAAAGGTGAACAATAAAAAAT
RM20090701043_36AT	TTCCTGTATCTCTACATCAGTCTCAAACAGCAGCA[A/T]GTTTGTACACTATTTACCTCCAGTTTACCCAACTGCTACTTTTAT
RM20090701044_49CT	CATCTTGACATGACCCTCCAGAATGACAATACCACCAGCAAAACTGCT[C/T]GTTCTGTGCGTGATTTCCTGCAAGACAGGAAT
RM20090701045_28AT	GCCTGTCCCCATTAGAACCACTTTTTC[A/T]CTCTGTGTGGTCTGATGTATGCCATTATTATGTATGAGCCAAATCCCTGTAAT
RM20090701048_10AT	GGGTACCAC[A/T]TGAGGGAGGAGGATGTCTTCCCTGTAACGCACAGCGTTGAGATTGCCTGCAATGACAAAAAGGTGGCTTTG
RM20090701049_37AG	TTCTCACCACTTCGGCTTTCTAAGTGCTGACAAGGC[A/G]TGGCTAGCAGCTCACAGAGCGGCACTGCAGGGCCTGACAAATTG
RM20090701050_79GT	TACGCATAATGTTAGCTTAATGTTGGTATACCAACCACTGGGAGAGTCAGACCATTCCATAATGTTAGCTTAATGTTG[G/T]TA
RM20090701051_68AG	CAGGACTAGCACTGTCAGGGCTCCACGGCACACCAGACTAGATCTGTGAAAGTGTTTAACCCTGAGC[A/G]CACACACACACAC
RM20090701052_16CT	CATCCTGACATGCCA[C/T]CAGCCATACTCAGCCACACCAGCCAGCATGACAATGCCACCAGCCATACTGCTCGTTCTGTGCGT
RM20090701053_49CG	ATTGATGGGGTCCACCTCTGTGACGAAGACACGGGCACCGAACCCACG[C/G]AGGACCTGGATGCAGCCCTAGACAACGTCACC
RM20090701055_55AC	CATGTCTGCTGGTTTTGTTTTATTTCATTTTGTGTATAATGACGACCTAAACCA[A/C]CAGGTGACGAAGCAATTTCCTTAATT
RM20090701056_52CT	AAGCTGAGCACAAGTCAGGGGAGTGAAGAAAATAATAAACAGAGGGAAAAG[C/T]TTAGTTGAGTTCAGTATAATATTTAGCAA
RM20090701058_6AG	CCTAA[A/G]TTGCCTTTACCACAGACCTAAAAAATGAAGAAGATGAGAAAGGTAGACAGCTGTGCTTTTGGTACTGATCTTCTG
RM20090701059_74AC	CTAATTAGATCAACAGGAAATGAGAATTTATTGGAATGTGGGCCGTTGGAAAATGTCGTAATGAATATTTACT[A/C]AACTGTT
RM20090701060_76AC	TCTGAGGTTACAGTCAAGGGTTTCCAAATATTCGGGGCACCGTGGTAAGTTTATCTCTTGTCTTGGGTTAAATAT[A/C]ATGAG
RM20090701061_20CT	AACTGAACGTCCAGCAAAG[C/T]TCAGCCACAGCAAATATGTGGCCATGTTCGTTAGTTTTGGCAGATGTAATAGAAAGGCCAG
RM20090701064_52CT	GACTGCCGTCATCAGTTGAGCGGTACTTTCTCAGAGAGAAGGGCGGTTTGG[C/T]GGATCATGTTTCGGAGGACGCCTGACTCG
RM20090701065_7AG	CATGGA[A/G]GCATCGCTGCTCTCAGAGGACAGCAGTGCTCTCTTGGCTCCCGGTGTGGCCTTACTCTGGGGGCTGCAGTCACT
RM20090701066_73GT	AAAGGGATGAGGAGGGTCAGAAACACGAAAGGGGGCAGACAGCTTTAGGAGACATGGGATTACTACTCACTC[G/T]GCGAGCAA
RM20090701067_55GT	GACCCAGGGGGGTGCTGTTGGCTCTCACTGACTTTCCTGGCAGGGGAAAACATT[G/T]AAATGTTATATTATATTGCCTGTTTA
RM20090701068_4AT	AGG[A/T]ACAGGAAGGCAACAACTGCCCGAGTTGCACCAGGAACGCACAATCCCTCCATCAGTGCTCAGACTGTCTGCAATGGG
RM20090701069_5AC	GGGT[A/C]CCACGTGAGGGAGGATGTCTTCCCTGTAACGCACAGCGTTGAGATTATTATTGTTGTCATCCTGTACCTGTCCCGC
RM20090701070_68GT	TTCGACAGAACACAAACTTAACATATAAAGGTGTGTTTTCTCGAAGACAGTGGCCTAATTTCTTTCT[G/T]CTGTGACTTGCCT
RM20090701076_28CT	TTAAGTAAAGGATTTCCCCAACTGACA[C/T]AACAATATAACAGTACACATACACTATACAGTATGCATTAAGTATGACTGTAA
RM20090701077_7CT	CAACAG[C/T]CAAAGGGGAACAGTTTCACTAAGACATTGATCTAGACTTCCTCTGTCTTTACTTTGGGGAAGGTGTGAAAAAAT
RM20090701078_73CT	TATTAGGCACTCTGTTTTGTTCCCATCACATGCGACACCTCTTTGTCTATATGTGAATACATTTGTCTCTGC[C/T]ACTGCAGC
RM20090701080_32GT	GACGCCGGCAAGGAAGACGGTCCGAGGGTGA[G/T]GAGCGGGCTGGATGTCCGCCAATGGGACACAAGAGCAGTCGTCAGGATC
RM20090701082_48AG	CATTCTGTAGAGAACCCTCACCCTCATATGTGTCCTCACTGTGAGAA[A/G]GGTTTCTCAAAACAATCGTATCTTAAAGAACAC
RM20090701083_71AG	TCTGACTGAAGAAGGCAAACGGCCAGGTCAGTTGGAGAGAGAGATTGTGTTCCAGGCCATCTTTTCATGC[A/G]AAAAGATTGC
RM20090701084_47AT	GAATGGTACAGAATACCTTTCTCTCTGCCTGTAATTATTATTATCT[A/T]AACATTATGCATGCTCTGGCAGTGAGCTACCCCG
RM20090701085_11CT	TGGTGCACAA[C/T]GGCAAGAGCTTATACTGCCTTGAAGCAAAGTCTACCGCTCCCAAGTGGACTGTTCTGTCAATGGCCAAAA
RM20090701086_6AG	AAGAC[A/G]AAGCTTGAATAAAAAATAGTGATACTAGCAAGAGGAGTGTGTGGGTTTGTCTTTTCTTTGAAGTTACTTCTCAGA
RM20090701088_42AT	TCAGCAGCAGGACATGACCTTCCAACTGCTCACTAGCACCG[A/T]GTCACTCACCCTCTACAAGGTAGGCACAGGTATTCCTGA
RM20090701090_63CG	CAGGTGGAGGATGGCGTGTAGTTCCTCACAAGTCATCAGCTCTACAGAGAGAGAGGAGAGAG[C/G]GGTCAATACAAACCCATA
RM20090701091_58AG	GTAGTAGAAAGAGGTGATCTCCCCTCCAGAGTGGTTGTACACGTGGGTTATCCTGCC[A/G]GGGTAGTTGAGATCTGCGTAGAA
RM20090701093_18GT	GGATATTGTACACACTA[G/T]AGCAACATGTAGATCCTGGAGATCCATGGAGATCCTTTACAATATAAAATGTACTGTACAAAC
RM20090701094_76CT	GTCCATAGTCAAACATTGTTAAGAATTTTACTGAGGCACTGGAGATGCTTTACTGGTGTTGAGTTTCTCTATACT[C/T]GATGA
RM20090701095_26CT	CATCCTGACATGACCCTGACATGAC[C/T]CATCCTGGCATGACAATGCCACCAGCCGTACTGCTCGTTCTTTACCTGATTTCTT
RM20090701096_9AC	AAGAAAAG[A/C]GACGTTGAGCAGTTTTCCATATTTGTGAAGGGCATGGTGTGATTCTCTCACAACTAAAAGCTGATGATTGTA
RM20090701097_21AG	TGTTAGGTAGAAGGTTACTA[A/G]TTCAACAATGGAAGTCAGCTCACACTCCCACTTTAGGAGAATGGCACCTCTTACTTAGCA
RM20090701098_49GT	GCGTGAGGTGCTGCAGCTGTTGCCCATAGACACATCTGACAATGAATG[G/T]CTTATACAGCCCAGCTAACCACAAAGTAAATT
RM20090701099_56GT	GTTTGTTTGTTGTGATGGAGTGGAGGGAAACAGCTGTGTGGGCAAGGTTCTGACA[G/T]ATGTGTTTGTCTTGGTGGAGGCAAG
RM20090701100_63CT	ACCAGCCTTTTTATGTACGTTCCTTTGGATATCTTTTCTCAAATTCCGAGCTATATAACAAC[C/T]AACTCTATGGACAATCAG
RM20090701101_3AG	AC[A/G]GAAACATATGCTTCAGTTAAATATCTCTAAATATCTACTGAAGGCATGGGCAACTACTCCGGTCTTTTGATCCTAGAC
RM20090701102_12AG	GGGAACTAAAC[A/G]TTCTATAACAGCAGACACAATGCAACACTATATGGGAAGCAGTGTTTTACTGTACTGACGACAGCCCTT
RM20090701103_7AC	CCCCGG[A/C]AGGGTGGACGTCTCATCCATGTTATCTCCGGCCACCACAGTCATCCTGGCGGTGTTGCCCGGGCTCAGCGCAGC
RM20090701104_50CT	TGTCTAAAGCTGTCAAATTAGGGGGCTCCACACTCCATCCCATAGAGAC[C/T]CTTATGGAAAAAACACCTGAATTTCACGTGA
RM20090701105_49CT	GTTTGACGTGGGCGGCCAGCGCTCAGAGAGGAAGAAATGGATCCACTG[C/T]TTTGAAGGAGTCACAGCCATCATCTTCTGTGT
RM20090701106_58CT	TATATTTATGGTTTTCACTTTCAGTTGATGGAGACCGGGTGTTACCTGCACTCTTGC[C/T]TCTGACAGTCCCAGCCTCTGGCT
RM20090701107_70AG	CTCCAGCATCATCTTGTCCAGAGCCTGGATGAAGTCCTCATCCTCAGCACATGCCACATGCTTCAGACC[A/G]CCACCACGGAT
RM20090701109_52CT	GATGAACGCTGTGTTCTGGACACCATGCGTCTGGTGGACCTGCTGCTGGTG[C/T]TGCTGTTTGAGGGCCGCAAGGCTCTGCCC
RM20090701113_78AC	TGAGGGCACACACTTTTTTGGCTTAGATTGAAGACAAACAATGACAAGCCACCAAGGTCTGACAACTTGGATGGAAA[A/C]TTA
RM20090701114_19GT	AGAATTAATTTCCTAAAT[G/T]AAATTGACCATATTAGGGGACTGGATTTATGCTCAGCCGTTGGAATAGAAAACAGATGGGGT
RM20090701115_16AG	GTTGAACCTCCATCC[A/G]GGTCTCAAATCTCTGGAAGACCGAAACAGGTTTCCCTCAAGAATTTCCTGTATTTAGCGCCATCC
RM20090701116_56CT	GTGATGAGACTGTCTCTCTGAGTTCCATCTCAGTAGTGCCAGTGGACTTTTCAAA[C/T]GCAGGGCTGTCACTGAGTGTGAGGT
RM20090701117_51AG	GGCTGCAGAAGGAAAGACAGTGAAACGTGGGTGGGGCCAACAGGTAGGCT[A/G]CAGAAGGAAAGACAGTGCAACACGGGTGGG
RM20090701118_33GT	CTCTCTCTCTCCCGCTCTGCAAATGGAAGTTA[G/T]AAATATCTTTGCTACAACAGAGAGATTTTGTAGGACTGTGACATCCAA
RM20090701119_15AG	ACAAGACTGCGATA[A/G]CCCCGTTGAGCTAAAGACTAGTCATAAACACAAGTCTCACAAGGGTTCTGGCAAGGCTCTTAATCA
RM20090701120_17AT	TGAAATATGTTTTTTT[A/T]ATTTGTTTACGGAGGTGCTACTCTCAGATAATAGCATCGTTTGCTTTTGCAGAAAAGCCTTTTT
RM20090701121_23AG	TCAATTCGGTCAGTGATTGGCC[A/G]TCCAGAGCATGACCTTCCTGATCATACCTACACACACACACACAGGAAGAAAATCACA
RM20090701122_39AG	AGGGACAGACACGACAGAGAGACAGTCAGATTTCTATA[A/G]TTACAAGAGTTGTCACTGACTTGCACGTTTGAGGCCCAAATA
RM20090701124_24AC	CATCGTAGGCAAACGGCCATGGA[A/C]ATGTTAACATTCTTAAGGGGGGGAGGGGGTAAAACTGCAGTGTCGTTCTGTAGGGCA
RM20090701125_19AG	GAAGAGGGAGCTGCAGTC[A/G]GTAGTCCTGTCTGAAGGGGCCTGGGTGATGGGCAGCAGGTAGGCGCGGTAGCCCCTGAGCAG
RM20090701126_39CT	ACTCTCTGCTAGCTGAATAAAAAAATGACTGCAGCTGA[C/T]CCGCTGCCTTGCGCCTACAAATACGAGCAGCCAAAATGGCTG
RM20090701127_41AC	AATTTGGAACAGGGCCAGAGGATTGGTAGATTTAAGATTT[A/C]ATCAAAACAAATATAAACACAGAAACTCCTCTCTCCTCTC
RM20090701128_43CT	ACCCACCGATCCTGTAGAAGTTAAAGAAAAGGTCTAAAAGGA[C/T]ATCTATTTGCTTTATTTTTTTTAAACAAATACATAAAA
RM20090701129_63CT	ACCCTGGTCCAGGTGAAGCAGGAGAAGAACACAGGCTCAGATGATGAGGGCCTGGTGAGTGG[C/T]GACTATGAGATGGACCAC
RM20090701130_77AC	TTGATTGGTCATGCTGGTCAGCTGTACCAACGTAAAATGATATGATTGACATATGCTCTTTTTCATACACATCAAC[A/C]AACA
RM20090701131_12CT	CAGAGAAATAG[C/T]GAATGGTCACATTTCAAACATTATTTTCACAAATAATGGAATGGATTTCAATTGTAAAAGTGCATAAGC
RM20090701133_23AT	ATTGAAAAGGCAGCGTTACTAT[A/T]TTGCCAGAAGCATAGAGGACCTTAAGGATTATCAATGTTTTGGTGATGAGGGCCTGTG
RM20090701134_15CT	ACATAGAACATACC[C/T]CTGTTCCAGACTAGTGCTCTAACAGGGGAAAGGTGAGGTGGTTAGGAAGGGAAAGAGGACACAAGC
RM20090701135_50AG	CGCACTGCACTTCCTGACAAACAGCCTATAGGGACAGAGGGGAGAAAGG[A/G]TGCGTTCCAGTGTGTAATAGATAAGTTGTCT
RM20090701136_49AG	GGGTGTCTGTGATTTGTAAGTGGCTCTTTCAGAAGCCTGGTAGGAGAT[A/G]TTATCAGGTCGGCTGTATGTACTCTGGATCTG
RM20090701137_12AC	GGGATGGAGGT[A/C]GACACTTTATCAGTGCACATGGGGGTGTAGAGAGAGCAGAGGAAGAAACGAAGGTGCACATCACAGCCA
RM20090701139_59AG	CAAGGGCCAACAGAGCTACCGCCATACTGGGAAGTGTAGGCTCTTTTCATTTCTCACA[A/G]AGTGAGCAATCTCTCTCTCTCA
RM20090701141_64CG	TGAGATGGACAGCCTTCAGAAGCAGATGGAGGAGCACACAGTCACCGTGCACGAGTCCATGAC[C/G]TCATGGACTAACGCAGA
RM20090701143_23AT	GGGTCCTGGCGGAAACGAAGCA[A/T]GGGATGACGTAGCAACAGTTTAGCTCAGGGAAGGAGTGCAGAAGGTAGGTTTGGGGTC
RM20090701144_40AT	CAATGCTTTGTAACTCTAACAAACATGTATGAGACGTTC[A/T]TATAATAAGCCTTTCTAATAAGGTTTACAATCTTTTCATTT
RM20090701145_55CT	AGTAAGATCCAGACCCCCCCTGGGCCTCACACCCTGCGGATCCAGCCGCCTCCG[C/T]TCCTCATCCTGGTGGGAGATAGGGAG
RM20090701146_37GT	GAAAGACAACAAGAGACTACTGTTAACAAAGAGCAT[G/T]ACAGAAACAGGACCAGAGACAGGGAGTGAGAGGAGGCACTGTCT
RM20090701147_79CT	CGACACAACGCAGAAATAAAAATATAAATCATGCCTTTGACGAGCTTCTTCTGTTGGCACTCCAATATGTCCCATAAA[C/T]AT
RM20090701148_58CT	CTAGACGCTCCTCTCCCCTGCAGTGACTAGACTCTCCTCTCCCCTGCAGTGACTAGA[C/T]GCCCCTCTCCCCTGTCCTGCAAG
RM20090701149_24CT	GTGGAGGCTGCCACCAAAAAGCA[C/T]GAGGCCATTGAGACGGACATCGGCGCCTACGAGGAGCGTGTGCAGGCTGTGCTCTCT
RM20090701150_33AG	TGCAGTTCAAACCATCCCTTACATCACACCTC[A/G]GTTCCAGTGCCCTAGTCACACAGGAGGGCTTTGGTGCAGCTCGACAGC
RM20090701151_81AT	GGGGGAGCCAGGGAGAGACACAGCGTCATCAACACAACCCCAACTTACCAGCTCTGACTGTTTTAACACACTGTTACAAC[A/T]
RM20090701152_54GT	TTGCTTTGTGGGGTGTCAAAAAAGCAAAGCATCTCTTTATCGTAGAAAAAAAC[G/T]TTTTATGTTACCCTTTATATTACCAGG
RM20090701153_27CT	GTTGTGAGAGAATTGAGCAGTGTTTA[C/T]ATCATTGTGGAGTGTGTTAGGTATTATATCATTGTGGAGTGTGTTAGGTATTAT
RM20090701155_47AG	AGGAGTACGTCAAACAGCTGGTCTATGTGGAACAGGTAGGTAGTCC[A/G]AAGGTTAGAGAGATGGACCAGCAACTGGAGTGTT
RM20090701156_70AG	TAAAGGAACCTAGTGCATGCTATCCAAGCTCTGTGCTGTGTTTACTGGTGCGGCATAGTCTCCACCACT[A/G]CAAAGCCAAGC
RM20090701157_81AT	AATCCATTCGTCAGGGACACAGGGGATGTCAAGGACCAGAGCACTGCTGCATATGGTGAGTGAAATGGCACCTTGGCAGC[A/T]
RM20090701158_48CT	TCACATACTGGTATGCACTCAAACTTTGCTTTGGATACAAGCATCTG[C/T]TGAGTGGCATATTTATGTATTTGTAAAGTTGTT
RM20090701159_57CT	CGGGCTACAGCCCAGTTCAATCCTCTATGATTTGGTTATAAACATACCGTATTTGA[C/T]GCTATCCTTTTTTCCAGAGTCCAA
RM20090701160_58GT	ACAATGGTTTACCAGGACGACCAGGAGAGAAGGGATCCCCAGGAGAGCCAGTAAGTT[G/T]ACCAGTACAGTTAATGGGGTTGG
RM20090701161_49CT	CTGCTCATCGCCCTGGCAACATCCTCTAGGTAAACAACAACTCTGACC[C/T]GAACATTAACACTAGCCTTGACCCTTAACCCA
RM20090701162_67AT	CTGACACTGAGCACCGGGGTGCAAATGAAACCGCATCAACAGGAGGATGGCTTCCTCCTTCTCCAC[A/T]TATCTGAGTTTCTT
RM20090701163_15CT	TGGCTGGAGTTGAG[C/T]CTGTTTTAAGTGAAGCTCAGCCCATTGTATAGTTACAGGATAGATATAACTTGCTCCAGCAGAGAC
RM20090701164_54AG	TACCATCCCTCCAGACAGCCCCAAGGTAGGTGGCACGCACACAAATCATCAAC[A/G]CGGACACAAACAAACCACCCCACACTT
RM20090701165_45CT	CATCCTGACATGACCCTCCAGCATGACATTGCCACCAGCCATAC[C/T]GTTTGTTCTGTGCGTGATTGTCGTGAATGTCCGTTT
RM20090701166_70CT	AAGTCAGTCAATCAGAGGCCGACTTTGGAAACAGCTGGAAGGTGAGTGTGCGTCTGTCTCCTTTGTAGG[C/T]AGAGTGTTAAC
RM20090701167_8AC	CATATTT[A/C]TTTTGGTGTTTTTCTAAGTCAGTAGAAAGGCCTCTTTAGTGTCCTAAAGTTTCATGACTGTGACCTTAATGCA
RM20090701168_31AG	CAGCAGGGTTATAGCTAGACAGTCAGAGAC[A/G]GGTTGACATGTAGACTCTTCTGGGTGGTCAATAAAGCTTATGGGCTGATG
RM20090701169_42CT	GGCTACCACATGAGGGAGGATGTCTTCCCTGTAACGCACAG[C/T]GTTGAGATTGCCTACACTGACAACAAGCTCAGTCCAATG
RM20090701170_42CT	GAGGCACAGAGCACACAGACAGACATGTAGCGCTGACCTCT[C/T]TACCTTCCACCCCACCACAGAGAGCAGAGCGAGCATAGG
RM20090701171_10AG	CTTGCCACT[A/G]CTTGTCAAAGCCAAAGCAACACTACATTGACTCAATGGCAATTTCCCTGCCATTGAATGTAGCTTTATGGC
RM20090701173_30AC	GCAGCTGGCCCGGTGGGCGGAGTTTCCAC[A/C]AGGGGACCAATGGAACGTACATAAAATGTGTCGAGTGGGCGGAGCAGCACA
RM20090701174_43CT	AAAATACTAGTGAACTGCGCACGTTGAGTATGGTACAGAATG[C/T]CATGGGGAGAGTACTACTATTACAAAAACATTCTGTAG
RM20090701175_22AT	CAGTCTTTCAGGTGACACAGA[A/T]CCCTCCGTCCAGCCCTTATGCCTTTATGGACAACTATTTGACCATAGGGTTTGAACTGT
RM20090701176_26CT	ATTTGGAACACCAAATTGAGTGTTG[C/T]TGAAACATACGGTCTCATTCCAACTCACTGAAATCTAGAGCCCACATGCTTTTTA
RM20090701177_60CT	TGTTTCATTAACCTTATTTGTAAGATTGCTCAGTAAATGTAGGTTACCACTCAGGCAGA[C/T]ATAATTCCCCAAAGGCAGAGA
RM20090701178_51AC	ATGGCGTGGTGTTGCAAAATGGAGTGATAGCCTTCCTTCTTTCCAGATCC[A/C]TTTTACCCTGTACAAATCTCCCACTTTACC
RM20090701179_19CT	TGATATTGACTCACCAGT[C/T]GTTAATCTACATGTGAGTGACCTATATTAGGGTCACTTCACTTTGGGTCTCTACTGACACTC
RM20090701181_60AC	TGAAATGTTTTCTCTCTTTTGTTTACTATGGTGCTATGCTCAGAAAATGGCATCGCTTG[A/C]TTTCGCCGAAAAGCCTTTTTG
RM20090701182_81GT	GTGCACTTGATGTAGATGGAGATAGCAATGGAAAAATGACATTGGTTCAGTGTTATGAATTTTATGAATAATGACTAAAT[G/T]
RM20090701183_73AG	CACCAGCACGTGGCTCTGCTCCTTGGTGACAGACACGCAGCGTACGGGCACGCGCATTGCCATGGGGGTGGC[A/G]CACAGGGA
RM20090701184_67AG	GGGTTGTTGTCGGAACTTTCCAGTTTCCAAACACTTATAATCATCCACTCATAATCATCCAATCTG[A/G]GAACAGACTGTCAC
RM20090701185_39AG	TCCTCTGTGTTTACATCATACGGATTAGCTGAGTTTGG[A/G]TTAACATATCAGTGTGTGTTTTTGTGAATATGCAAACCTATA
RM20090701186_27AT	GTGACCAATTCTCCATTGTCAGGCAT[A/T]TCTAAAATAATTTAGGGAATAAACAAACTATGAGGACATCATTTTAAAAAGCCA
RM20090701187_30CT	TTAACCAGATAGATATTGTTCTTGATAGG[C/T]AGTGTTTAGACAGACACCCAATTCAGATTTTTTTATTTTAAGAATCACATC
RM20090701188_58CT	CATGGTAAGACCAGGCACAACACACATGAATATGGGCATGAGTGACACACAGTCTCT[C/T]ATGTAAAGCTGACAGGCAATTTC
RM20090701189_59GT	CACTGTGTATGTATACTGACTCTCAATTACTTACTTCGGAGTTGTTTCATTGACTATA[G/T]GCCTGCTCATCAGTATAGTAAT
RM20090701190_26AC	CACAGACACAATTCATCAATTTGTC[A/C]TAACATAATAAGAATACATAGAATGCTTAAGTTGCCTAACTGTAGTAATTTGACT
RM20090701191_37GT	CCCCGTGGTTCCCTGGCCACGAACCACGATCACATC[G/T]ATCACAGTCAGGTTGTTCCTGTAATACAAGACAACACAGTGGGT
RM20090701193_58AG	AAGAACAACCAAGTAGATAACTTTAGAGTCCTACTGCAGGAAAAATACATTAAACTA[A/G]AAGCCAGGAGCCACAGACTGGCA
RM20090701194_42GT	GGAAGTGAATATTTAGTTATATTGTCTCTGTGTTGTTAATA[G/T]TCTAGGGTGAGTTGAGCTTACTTCCAGGTGGCATGGCAG
RM20090701195_8GT	CAGTGTG[G/T]CGCCACAGAGAGGGGGGGATGGGTACCAATCTGCAGTGCTCTGCTGCTCAAGCTGTCACTTTAGGTTGGATGG
RM20090701196_36CT	GGCAAGGAGACTTGCAGCTCGGGTAAAACCATTGA[C/T]AACTGCGTGCCGTTATCAAGGGATTTTTAAATAAGTGTTAACTAT
RM20090701197_66AT	GGGAGAGCGTTATGGGCTGCCAGAGAGCTGCTCCTCGGTTTCAGCAGCAGCTACAGTATCTCATG[A/T]CCTCAGTGCTCCTCA
RM20090701198_59CT	ACCTGGGGTCAGAGAGGGTCAAAGGGCCATGACACGGGTTGTTGCGCAGGACACCATA[C/T]CTGGCTAGAGCACCATGGGGCC
RM20090701199_17AC	TTTCAAGGAATGACCA[A/C]GTCGGTCCCTGTCTTAATAAACCACAAAATGACCCGGTCCCTTTTCAACCAGTTTCCCTTCAAC
RM20090701200_31AC	CTTTGTTTCATGTGGTTGAGTGGGGGGAAA[A/C]AGCTGCGGGCAAGGTTCTGACACATTGGTGTGACTTGGTGGTGGTAAGGA
RM20090701201_70AG	AACGGACCCCCTGCAGTACCTCCGCGGACCCATAGCCGTGGGAAGTAAGGGTGCTGCAGCACGACAAAC[A/G]AATGGATGTTT
RM20090701202_17AG	GCTGCTGGCAACCCCT[A/G]CAGTTGTACAGTCCTAGCGAAGGGCTGCAGGTGAGAAACAAAGTCCACTGATAATGTAGGCCTA
RM20090701203_24CT	AAATGACCATATTTGTACCACGG[C/T]TGTCAATTCATTAGGGACAGAACCAGGGCTATTGATGTTACGGATCTCAAGAAAACC
RM20090701204_41CT	TCACAGGCACAAACGTAATATACTCTGAACATACTCTACT[C/T]CCTAGTACAGTGACCCTGCACTATGGCCACCCAGGTCACG
RM20090701205_80CT	GTGTGCCACATGAGGAAGGAGGATGTCTTCCCTGTAACGCACAGTGTTGAGATTGCCTGCAACAACAAGCTCAGTCTGC[C/T]G
RM20090701206_16CT	AACGTCTATGCTGTC[C/T]CCTTTAAGAGAGTTCTGGTGGTGCTGAAATGGATTCAACTAGAGCTAATACTGCAGCTTCAATTC
RM20090701208_42CT	CCGTCCCCGGTGGGAACCCCCTCCTTTAGCCGCCAGCATTT[C/T]TCCCCTCACCCCTGGAGCGCCTCCACCTCCAGTAAGAAC
RM20090701209_2AG	G[A/G]AAAAATGACAGTCCCATACAAAATTATTTATTGATCACTCTTTCACGGTAACATTTATATTTCATGTTTCTAAATATGT
RM20090701210_81AG	AAGGACTATTTGACCAAGAAGGAGAGTAATGGAGTGCTGCATCAGATGACATGGCCTCCACAATCACCCGAACTCAACCC[A/G]
RM20090701211_68GT	TCAACACACAGGGATCCCAGACACACACGGATCCTTTTCTTCAGGTGTCTGCGTGTGTTGAACTGAT[G/T]AAATAAATGCCAG
RM20090701212_81CG	CACCACATACAGTATATCTCAAATGTTGTGTGTGTTGTAGGTGTGATGCAGCGGAGCAGAAACAGAACCTTCCATGTGGA[C/G]
RM20090701213_37AG	GACAGTGTGTTGGTGCTGGTCCAAGTCTGCTGGTCT[A/G]TCATGGCAAGTTCGTACTATCAAGGCACAAGGCGAGACCCAGAT
RM20090701214_15AG	GGATGTTCGGATGT[A/G]CCGATCCTGTGCAGGTGTTGTTACACATGGTCTGCCACTGCAAGGACGATCAGCTGTACGTTCTGT
RM20090701216_5CT	GGCC[C/T]CCGGCTGGGGGAGAAGAGGGCTCCAGGACGGTCAGCTGAACCGGTTTGGGAAGGATGGGACGGTGGGCTCGCAGAG
RM20090701218_9CT	CCTCGGGA[C/T]AACATAGTATATGCTACAGACCACATAAACCTGTTCCAGACAAACTTCAACAGTTCTAAGCCCTCTAGAATG
RM20090701219_23CG	CGGGGCCCTGGAATAAAAAAAT[C/G]TAAAGAAATACCATATAAATGTAAGGGGTGCGAACTGGCGGCAGAGAAGTCAGACGCA
RM20090701220_69CT	ACAGGATACAACTACAGGCACAGTGCTCAACAAACGTCTTTTAACCAAGACACCAATGGTGAAATATA[C/T]GCTGAAACAAAT
RM20090701221_16AG	TGGAAGATACTGGTC[A/G]TCCTGGGTTTCCCCCCTTGCCACTGGAATTCACCTTCCTACAGGGAGGAAGTGCTGTTGGAGATT
RM20090701222_37CT	TTGTCCCTTCTATAAGACGGTAGGCATCCTGTCCAA[C/T]ATCATTGCGTTCTACGACATGGCGAGGCACGCGGTGGAGACCAC
RM20090701223_67CT	CATCCTGACATGAACATCCAGCATGAAAATGCCACCAGCCATACTGCTAATTCTGTGCGTGATTTC[C/T]TGCAAGACAGGAAG
RM20090701224_65AC	CCCGGCCCGCCACAAGGAGTCGCTAGAGAACCAGAACCAGAACAAATAGCAGGCCAAACTATCC[A/C]TCTCAGCACTGCCTGG
RM20090701225_33CT	GAGTCTCATGCGGCCAGCGAGCAGGGCAGCAG[C/T]GTAGTCAACGTGGAGACGGCCAGGCACCAGGGAGCTCCCCACGAGGTG
RM20090701227_7AT	GTAAAT[A/T]TGGAGGACAAGAAGATAGATGCTGTAAGGTCTTGGCCAGTCCCAACCACCATCAAGGGGTTACAACCTTTTTTG
RM20090701228_73CT	ATCCTGGCGGGAAGTTATCACGCCTTAGACTGAGTGTTTATATAACCAGATAGTGCATCTGTTCCTTTGAAG[C/T]TGTCATGA
RM20090701230_54AG	TCTGAACAAGAAACAAGAGGCAACGAGTTGAGTAGAAACAGACTGCACATCTC[A/G]AAACTGTTTGTTCTACAACCCACATCT
RM20090701232_14AG	GTCAAGGTGTGCT[A/G]AGTGCTTGTGTGCATGTCCATATTTCGCCTGTGTGCAAATGCATGCTTTCAGTGGGAGTTTATTGTG
RM20090701233_47AG	GAGCCTCAGGGCCACCACCTCCTGGAGAATACTCTCCAGCCGAGGA[A/G]TACTCTCCTGGGGCTCGCTCAGAGACAGCAGTTC
RM20090701234_31GT	AGAGAACAGCCTGGGGAGGGCAGAGAGACT[G/T]TTCCCCCCTGGACCCACTGCGCTGACCGTAGCCCTCTCTGTGTGTGGGGT
RM20090701235_33AG	CACACAGAACCAGCCAACCTCTTCACCTTGGT[A/G]ATGATGCAGGCTGGTCAGAGAGAGGGCCTTCCACCTCACTGTGAAAGC
RM20090701236_70AG	GGCGTGGCTGACAGTGTCAAATGCTAAACTGAGGTCCAGCAGTATGAGAATGTTGGCATCCCCAGAGTC[A/G]GCATTCATGAG
RM20090701237_36CT	GAGGGTGGGACTAAGTCAATTACTGGGTAACACTA[C/T]TTCCCTCTTCCCTCCCCCACCACCACATCACTCTACCACTGTCTG
RM20090701238_78AG	TCCAGCTCAGGAACCAAGTCTGTGAGGGTGAGTTGGTCAACATCATCATCATTATGATTATGAAGTAAAATTGGTTT[A/G]TTT
RM20090701239_28AT	CTACACAAAACATAGAAGTAAAATATA[A/T]AACATGCCTTACCATTGACGAGCTTCTTTTTTTGGCACTCCAATATGTCCTAT
RM20090701240_21GT	GGCCTGCCCTGCTCCTCCTC[G/T]CTAACACATGTTCTGACCTGCCTCTGTCCTCTATCCCTGAGGCTAACCTTGCAGGCTGAC
RM20090701241_4AG	CTT[A/G]CAGGAGCTGGGAATGTGAAACCTGAAGACACAACCAAAGACAATTGTAATTACTGTACTAACAGTAATAATTAGGTT
RM20090701242_81AG	TAAAGTAAGAATATTGCTCTGGAGCACTGAAGGCTTTTGACACTGCTGGGATTGATGTCTGTCTAATGCCTTCCCTCAAT[A/G]
RM20090701243_43CG	GATTATTTCCCTCCTCTCCCAGGTTCTCTCTGTTCGGACTCA[C/G]TTCACTGTTGGCCTATTTTGGCTCAAGACGGATGGTCA
RM20090701245_72CT	CACCATCTCTACACTCTCCCCTTCTTCTCTCTTCTGCCTCCTGGTGGTGTTGAAGTACAGATAGAGGACCC[C/T]GGTGGTCGT
RM20090701246_31CT	AGATCGAAAGGACATCTACACCTCTCCCAT[C/T]CATGTGGTTAGGATTTGTCCTGGGCTGGGGGTTGGGGGGAGGGCGATATG
RM20090701247_81CT	GATAAAATACTTATCTATTTAGGCATAATAAAATGCTTCAGTTTTTTCCCGATCAAGTATCAACTATCAATTTACGGATG[C/T]
RM20090701248_45AT	GCCCAACCAGTGTGTGTGTGTGAGAGAGAAACAGCCAGTCAGCT[A/T]CTCATCCAGATGTCAGTTCTAAACTGCTATATGAGC
RM20090701249_72AG	TCAGAGAGCATTACCTACACACATAGTCACTGGGAGTACCTGCAATAAAATACACATCACTTAAAGCCAAC[A/G]GTCAAACAA
RM20090701251_43AG	AATCACTCATGGGTACATCATCACATCCCTTTAGCCCATTAC[A/G]GTCTTGACTAGTTTAGGATTGGTCCTTTGTGATACCGA
RM20090701253_4AG	ATG[A/G]AATGCATATAAGGAATATCAAACCAACCCGTTTTAGAGGGAGACACTGGGTCTGTGCCCGCAGAAAGGGAAACAGGA
RM20090701254_16AT	TCCTGACATGGATAC[A/T]GCAGTCTCTCTACTTGCCTGCAAATTGTGCTGAAATAGAGGGTTTCTTTCACACCTCTCTGGAGT
RM20090701255_27GT	ACCGAGGAAGACGTTTCACTGGAAAT[G/T]AACACAAACAGCATATGGCACCGGCTCAGCGGTTTAAAACGTATCATATGAATA
RM20090701256_48AC	GGCTAATCTCTCAGGGAGAGAGAGCAGCCTCTCTGTAACTCTCCTCT[A/C]TCAGGGAGAGAGAGCAGCCTCTCTGTAACTCTC
RM20090701257_29AT	GTTGTAGTCTTGCTGAGGTCTTCTCTGT[A/T]GCTAATTAGCATTTCAAATTTGAGTCAAATATATTGATACAACTTACACGTT
RM20090701258_26AC	TTACCACTTGTTCATCTCCATACAG[A/C]CTGTGTCTGCTTTGAACTTGGTGCCAGTTGATGAGTATCACTGTTTGAGTCCCTA
RM20090701259_31AC	CTAAATATATTATCTTTGCTTACTGTAATA[A/C]CTATTTCACATTACTGAGCCGATTCAAGCCAATCTGTAATGCACTTTCAT
RM20090701260_29GT	TCTTCAGATATTCAACTAACTTCACAAA[G/T]AATTGAAAATACATGATCCAATTACAGCATCGTGTGCTGCTTGACTGAGGAA
RM20090701261_12CT	TGCGCTCCAAT[C/T]GTAATCGCATTTGTCTGTGTGAACGCATTGGTCTCAGTCTGTCTGCTGAACGTGGCGGTTGGGAACATG
RM20090701262_20AT	TTGATTTCTATGTCGGGGG[A/T]TCAGCAAACCCTTTACTTTCATTATGTCTTTGCAGATGGAGAAAATAACCATCCCACACAT
RM20090701263_3CG	CC[C/G]CGACCTCTGGCAGGGCATCCAGGTCATTGACCACCAGGTGGAAGTCGCTGGTCAGCAGGAACTGTGACAGGGTTTTCA
RM20090701264_55AG	CGTGAGTAACGGCTTCCTTATACAGTATGTTTGCATTGTGATCCATTGCCTCAT[A/G]CCCACTGATGGTTAAACTGGCAGTAA
RM20090701265_48GT	TTTGTCTAGTTCCCGGTATGTTCTGCCAAATTCAAAACAACAAAAAT[G/T]TCATAATTAAAATTCCTCAAGCATACAAGTATT
RM20090701266_36CT	CCAGCAGGCTCACAGACCCCACCGCTGGAGAGACG[C/T]TCCCCTCTGCTGAGCCGTAGGAAGGCAACTCTGGAGGTGCCTAAA
RM20090701268_25GT	AACTGGCAGGACCATAGCTGCACT[G/T]CTCACACTCTAACACATCTTATCCTGTATTCTGAGCTGATGTTGAGAGAGAGAGAG
RM20090701269_52GT	TTTTACAGAAAAAACAACAAGAGTGACCTTCTCATTGTTTATATGTCTCAT[G/T]ACTAATTAGGCAGGGAAAAAAGTCTGGAA
RM20090701271_33AG	GGGGAGGGGTTGTGCTGTTGTCACACATGGAC[A/G]CATTTTGAGTCGCCAGGGTCTCTTAGTTCCTTAATTCTCCTCGTAGAC
RM20090701272_16CT	TCCTCTACTACAGTA[C/T]AGACACACAACACAGTCCTGTACTGTCTCACATAGGTTGGTGTAGATCACAGTTGCATTGAAAGC
RM20090701273_33GT	GGGAGGAGGATGTCTTCCCAGTAACGCACAGC[G/T]TTGAGATTGCCAGCAATGACAACAAGCTCAGCCCGATGATGCTGTGAC
RM20090701274_5GT	GAAT[G/T]GTTAAATATAGCACCTTCTAGTGAATACATTTTCATGCTTAGGTGAAGTTTTATTTCTACAGAATGTGAACCAAAA
RM20090701276_28GT	TGTGGCCCACTGTGGGGAGATGTCTGT[G/T]CTCCATTTCTCCTCTACACTATTGAACACTATTACACTATTTGGAATAGCACT
RM20090701277_9GT	ACAACCAA[G/T]AATCACAATCAGACCCAGGTTCAAACCGTTTACAATCAACTCTCCAGATAAACCCCAGTTGTCACCAACCCT
RM20090701278_55CT	TTCCCGTCTGTCCAGAGCTGCTAGAGTCTCCCGTCTGTCCAGACCTGCTAGAGT[C/T]TCCCGTCTGTCCAGAGCTGCTAGAGT
RM20090701279_66CT	CAACTATACATCAAGATAGAGAAGTGTGAGTTACATGTATCCCAAGATTATTTTCTCGGCCACAT[C/T]ATCTCTACCGCCGGC
RM20090701280_78AT	GATGAGGTGCCAGAGGTCCCTCCGCCCCTTCTGGACATCGAGAGGTCTCCGGCATACACTGTACGTTCCATTCTCGA[A/T]TCT
RM20090701281_37CT	CTACCAATGTGTAAGTTGACTGTCTGATATTTATAC[C/T]AGCATGCAAGTATAGAGATGAACAACAGCATTCTTTCTTTTGAT
RM20090701282_39AG	TATGGACAGCGATTCATGGGCCATATGACAGTCTCTCA[A/G]TACTTTCCCTTTAGTAAAATCAAACCCTGCGCTCATGTCACA
RM20090701283_60AC	TCGCTGGTTGGCCAGACGGCATCATGGGAGAAACTGGAGAAGAACATTTCAGATCGAGT[A/C]GGTGAGAACAGAACCTCTGAA
RM20090701284_42AG	ATCACAGTTGGTTTCAGCGTTTGAAGTTACAGCTTTTCCTC[A/G]GTAAACCGAACATGAAGGTTGGACCTCAAGACAAGATCT
RM20090701285_45AG	ATCAGTATAAAGGACAATGACAGCCTGGCGGCACGCCTGGCCGT[A/G]GAGATGAAGGCAGACCTCCTCATTGCTCTCTCTGAC
RM20090701287_8CT	ACCTCTG[C/T]GGAGAGGAGAGAGGAGTTAGGAGCATGTAGCAACAAAGAAATGTGCTTTACTGATATAAAGTAGAGTACGTAA
RM20090701288_64AC	GCAGAGATGTACAGCATTTTTCCCCTGAACATAAAGTACTTACCGGCTCCTCAATAAATATTT[A/C]CTGAAATGCAGTGCATG
RM20090701290_23GT	GGACGCCCCCTGTAGAGGCGTG[G/T]ACACAGAGGCGTGTGACCATGGCAGCAGTGCAGGAGGCCCTGCTGTCCCTCACCTGAA
RM20090701291_75AG	CTTAATGTATGAACACACACATTACCTCAATATACACACATTTACTGTACGCTCAACCTACACACACCCTAGGC[A/G]AGGACA
RM20090701292_45GT	ACTAGGGCCTATCGACCACTGCAGTCAGCAGCCAGTAATTAGCT[G/T]CTTTTCTCCCGCAGAGACAGAGAAGGCCTTGGTTCC
RM20090701293_67AG	CATCAGCACCTGTCAATCCCTGAGGAAGAATCACAACATCGTTGAAACATTATTAGACATTACACT[A/G]TGCTATTTCTTACA
RM20090701294_18CT	CTGTGTGGGTTAGGGTT[C/T]GCTCTATGGTAAATGTTCGGTCTGCACCACTGGACCCAGGCCGTGCTCTGGGCAGAGTGTCCT
RM20090701296_57AG	AGAACCAAGTCAAGTTATCTGAATAGGGCTTGCACGGTGGAAGACAAAACTGCCAC[A/G]TGAAAATGTAGTGAGACAGTGACT
RM20090701297_43AG	AGGGCCCACATGAAGGAGGAGGATGTCTTCCCTGTAACGCAC[A/G]GCATTGAGATTTCCTGCAATGACAAGCTCAATCCGATG
RM20090701299_72GT	TCCATGCTTCTTGTGTTCAGGGGCTTTGATGCTTGTCATGGAGGGATTCACCATGGTGAAGAAATGCTAGC[G/T]TTTATCTAA
RM20090701301_22AT	GGGCTTTCACCCGGATAGAGT[A/T]GGGCCGTACGCCGCCTCTGAGCGCTCCTAGGCCAGCAGCTCGCGCTGCTAGGCTGGAGG
RM20090701302_65AC	AAGCTGGAGAAAGTTCACTGAGGAGGTTCCCAGGGGTCACAGGAAGATCAGCAAGTAAAGAGAC[A/C]GAATGAAACCGGTTTA
RM20090701303_64AC	AGGAACACATACAACACTGATAGTAGCAAACATGCATGGCAGCAAGACTGGAAAGGGACATTT[A/C]AAATATTTTAAGCTCTC
RM20090701304_19AT	CTACACAAAACACAGAAA[A/T]AAAATATAAAACTTACCTTTCACGAGCTTCTTTTGTTGGCACTCCAATATTTCCCATAAACA
RM20090701305_42AT	TGGCCCCTCTTCTTTCTCACCGGATCAACTTTCTTCTGCGT[A/T]GGAATGAGTCAGACACCTCCTCCAGGCTAAGACATATAA
RM20090701306_20AG	GGGTACCACGAGGGAGGAG[A/G]ATGTTTTCCCTGTAAGATTTTCCCTGTAAGCGTTGAGATTGCCTGCAATGACAACAAGCTC
RM20090701307_48AG	ACAGGCAAACAGACAGCCAGCCTCAGAGCAGAGCACTTCACAGCTGA[A/G]CTGAAGGAAACAGGTCTCAGGAGAAGCCTGATG
RM20090701308_76AG	AGACAGGACTGACACTATACCCTACAGGACTGATACTGTAGCCTACCGGACCTTCACACTATACCCTACAGGACT[A/G]ACACT
RM20090701309_20AC	TGATGATATCTTATGATCA[A/C]GGTTCATCTCTGATTCTGACCGCTGTTTCTGGCTGCCATCCTTTTGTACCTCTCCATGCAC
RM20090701310_40CG	GGTGGGGGGAGGAGTTACACCTGGTGAGTGACATTCACT[C/G]ACTGACGTGGTTGACATTGCATATACAGCACATGAAGGAGC
RM20090701311_17AG	TGCTACTGTATGGACT[A/G]GAGAGCAAAGGAGCATGTATCGGTTACATACCAGTGGGATATCATGTTACTGGGCCTCCATGGC
RM20090701312_57AG	GAAATAATTGAGTTTTAGATAACACATTGATACATGCCAACTGGCAGTGCTTATAA[A/G]GCAGAGATAAGTGCCTCGGGTTCT
RM20090701315_71AT	CCCAAACAGTGCGCCGGTTTATTTTATTTCAGTTTAGTACTAGTCCAGCACACCTGAGTTTAACAAATCA[A/T]CTAATCATCA
RM20090701316_76AG	CCGCACAGAGAGAGAATGCTCCAGCACAAAGTTACAGATGCACAGGTCTGGAGGGACATACTGGAAGAGACAGAC[A/G]GGAGA
RM20090701317_10CT	GCACAACGG[C/T]CACGACAGGCCCTGCACACCTGAGGAGAAGAGGAAAGAGAATGTAAGGACTGGAACTATTTAATGATATAA
RM20090701318_36AG	CCATGGGTGCACCAGGCTGGGGCCAGCCTCCTATG[A/G]CTAACCTCTTCCAGCCCGAGCCTTACACAATGATGGGAGGCCCTC
RM20090701319_28AC	AATAATACCATGTCAAATCACATACTG[A/C]TCTAAGATGCCCTCCATGGATCAACTGTCCCAGCATGGGAGCTGTTCTCAAAG
RM20090701320_49AG	CCAAAGGTGTGTTCTGTTGGTCTCCATCCAAGGAAAGGAAAGGAGCCA[A/G]ATAGCACCAATGTATACAGGTCAGCCACTGGT
RM20090701321_38CT	AATGCCCTGTATATGAATAGAACATAGGAAACATGCA[C/T]CGTGCATAAACTCCCCATCCAGGTCACGGTTACCTAACCTAGA
RM20090701322_58AG	AACAACGGGCCCGTTATCTTGGTGTCGCGAGGCGGCGTCCAGGCGGGGAGCAGCCGT[A/G]AAAAGGGGCCTTTCCTCTGCTAA
RM20090701323_45CG	AGTCTGGGTAGTCGTGGGGAAAGTGAGGCTCTCCTTTATTCTGG[C/G]CGTGTTTCAGACTCATCCTCAGCCCTCCGATACGTA
RM20090701324_75CG	TCACAGCAGTATTTGGGCTCTGGGGTGGCTATGAAGTGGTCCCAGAAGCCCCCATGCTGGGGTAAGAAGCCTGC[C/G]TCGGGG
RM20090701325_21AT	TTTGTCAAAACAGCCAGGAA[A/T]CCACACCTGAAATATGACTCAAGTATGTTCTTGAAGGATATGATATACCAACAGGCATTT
RM20090701326_52CT	CTGGCTTGCCCTCTTGACTACACTAGCCATACTGCCCCCTGGGGGGCGCTG[C/T]CCACTGGGACTTGCTCTGTGACCTGCTGC
RM20090701327_1CT	[C/T]GACACAAAACGCAGAAATAAAAGTATAATTCCTTACCTTTGACGAGCTTCTTTTGTTGGCACTCCAATATGTCCCATAAA
RM20090701328_33CT	GGATTTCAGATACAGAGCTGTTCTGTCCTTAA[C/T]GATTTACTGTCAAAGTTGGATAAAACCAAAGTTGTGTTTGTTATTGAT
RM20090701329_78CT	GGTTGCTCTCCAGGCAAATAGCTGGCCACGTTGCTCCAAACATAACATTTCAAAGTGTATCGTTCCATTTCTCCAAA[C/T]GTC
RM20090701330_65AG	GGATACTAGATGAGGGAGGAGGATGTCTTCCCTGTAACGTACAGCATTGAGATTGCTTGCAATC[A/G]CCTGCAAGCTCAGTCC
RM20090701332_35AG	TCCACCCAGCCTGGTAGAGAATGCAGATGAGAAA[A/G]CGTCCCATGTGGCACCATATCCCCTATGGGCCCGTGGTCAAAAGTA
RM20090701333_53AC	AGAGAGACATTACTGTACTGTATGTACTCTGCACATTAAATAAGACGGGATA[A/C]TACCATTTTCTAACAAGTTTTCTTTCAG
RM20090701334_73AG	CAGCCTCAGAGGCTTGTTGGCAACACGCACTGGTGGATGGATGGAGTCCAGGACTTCAAGTAGAGTTATCCC[A/G]TTTGCATG
RM20090701335_12CT	CTGGAGAGCTT[C/T]GTCAAACGACAGTTCACAGGTGAGACAGCACATTGTTCCCTCTGAACAGGTGAGACAGCACATTGTTCC
RM20090701336_3AT	TC[A/T]TTCCGCTACCACTGTCAGCTCTACTCTGAGTGGAGACGAACCAACCAGAAAGTACGCCTGCTCCTTCCAGACGCGAAG
RM20090701337_33AC	CAGATAGCCGAGCTCAGAGCACAGCTCGCCGC[A/C]AAGGAGGAGGAGCTACTGGCCACACAGGCCAGGTAATCAATCCCAGAT
RM20090701338_46CT	GGTTGAGCTAATGTGATAAGCATAAGGTTGTAAGTAAAAAGAACA[C/T]TTCCCAGGACATAGACATATCTGATATGGGAAGAA
RM20090701339_71AG	GCGTACGGAGGAGACCGGGGGGGCTCTTTACTTCTTCCAAACGGTGTAGAAAACCCACCTGAGTCAGCTC[A/G]TTAAGGAAAA
RM20090701340_1AT	[A/T]AATGACAATGAGTATTTCGCTAACACAGGGTTTTAAAGTGTCGATAATGCGTGTGTTTAGAGAGCGCGAGTTGACAAAAT
RM20090701341_61AG	GCGGTAAGGGAGAGATTGAACAGCAACATCTACGGTATCTATGATGCATCACTCATTGAT[A/G]ATACGGTCAATTTAGAAGGC
RM20090701342_13AG	GTAGACTACATA[A/G]CATCACAATCACCCTGTTGTAAGACTATCCTTATGGTAAGGACTTGTTACAGGACTCCACAGGTTTTA
RM20090701343_63CT	GCAGGAATCTTATCTTTTGGTACAGTATCTTGTAGCCCCTCTCTCCAGGCTTCCGTAGGTTC[C/T]TTAGGATGTGGTCAGAGT
RM20090701344_41AG	ACTGGTCAAAATACACCAACACATATGACATCAGGAAGAT[A/G]GAATCCCCCCACTATAAATACATTGCTCCATATACTGCTA
RM20090701345_44GT	GGGTACCACATGAGGGAAGAGGATGTCTTCCCTGTAACGCACA[G/T]CGTTGAGACTGCCTGCAATGACAACAGTCCGATGATG
RM20090701346_15CT	GTCACCGACGTCAT[C/T]CACATCAATGGTCGCGATGTCGTCATGGCAACCTTCTCCACACCTCACAACAGGTATGATTGTCCG
RM20090701348_26AG	CTGTTACGTTAGGAGGGGGGCTGAA[A/G]CCTCCTGCTGCAGCCTGTTGCTGCTGCTGCTGCATTAACATCATCATCCGCTGTC
RM20090701349_72GT	CTATGGTCGTCAGTTCCTCAGCTATCAAAGAGACAGTTACCAAACAGAGCTGCAGAAGAACAGAGGGAGGG[G/T]ACTGCTACA
RM20090701350_23AC	AATGGCTTTCAAGGTGAAATCT[A/C]CCTTTATGTTGAGTTGGCGTGGTAAACAGTGTCTGGCAGTGGAATTGTTGAAAAAGGG
RM20090701351_9CT	CAGACTGA[C/T]GTCCCAGCACAGGTCACATCACAACCCCCTCACTTCCACACGCACGCTCACTTTGGGGATGCGTCACAAATA
RM20090701352_4CT	GTC[C/T]TACAGGAAAATGGCCCTGAAAATCTTGTGGGACTTTTTTGTAAGGGAACCTACAATTTAAAAGTAAAAAAACACACA
RM20090701353_39AG	GGGTGGAGGATGATGGAGGAGGATGTCTTCCCTGTAAC[A/G]CACAGCGTTGAGATTGCCTGCAATGACAACAAGCTCAGTCCG
RM20090701354_43GT	TGGGACAGATACAGTGCATTTCAGTGGGTCACCTCATCAGTC[G/T]GAGGTGAGAGTGGTTGATTGCCAGAAACGTTCCACAAT
RM20090701355_53AC	GGATACCGTATGAGGGAGGAGTATGTCTTCCCTGTAATGCCTGCAATGACAA[A/C]AAGCACAGTCTAATGAGGCTGTGACACA
RM20090701356_33CG	CTCATAGAGGTACCCTACATAGGCTAAACACA[C/G]ACCTACAGAACAAACAGGTTAAAATGACTGAATGACTGGGATATTAGA
RM20090701357_21AG	GAGACAACACTATGAAAGCT[A/G]CTGCATAACACACACAATTAGGCTCGACTGCCATAAAAAATAAGTGTTTTCTGTTTACAT
RM20090701358_23AT	CTCAAACCCTGGCAGGGGGAAC[A/T]TCCTCACACTACCTGCTGTCCCCCCAAATGGCATCGGGGCCCTACAGAAATAAATGGG
RM20090701359_37GT	GCTGGGGCTCGGGGCCAGAGCAGGGCGCAGGAGGGG[G/T]GCCCCAGCTTCCGAGTCAGGCGGCTCAATAATCGGATCCCCCCG
RM20090701360_23CG	TTTTTCTGTGTGAGAGCAACAA[C/G]CAAGTATACAGTATAGGACAAGGAAGTATACAGTATAGGACCTGTTTCTGACATTGTA
RM20090701362_15CT	AACTTCTACCCAAT[C/T]GCCAGCCAGGCCTACATTCAGGACAGCCAGCACCGCCTCACCCTGCACTCTGCCCAGGCCCTGGGT
RM20090701363_60CT	TGAAATATGTTATTTTGTTTATGGAGGTGCTATCGTCAGATAATAGCATCGTTTGCTTT[C/T]GCCGAAAAGCCCTTTTGAAAT
RM20090701364_28AG	TAGAGCATGTTAGACATGAAGTTGACG[A/G]GGTTGACGCTACGAGACTTATCCATGATCCAATCTTGTAGCGAAGCGATTCAA
RM20090701365_34AG	AGTGAAAGTGAGGGAAGTGATGTGGAGAGTCAG[A/G]GCTCTGCAGCAGAAGGCAGGGAGGAAGAGATGATTGGCGAGATAGAG
RM20090701366_28AT	CAATTTTTGAGTGTCTTTGACACTTGA[A/T]CCAATAGAGCGAAGTATGCCGTTGACTCTCCTAAGATAATGATATACAGTATG
RM20090701367_40AG	GGCAGAGAGAGAGGGGGGATGAGATACGGGAGGGAGAAT[A/G]GAGGAGGAAGATGAGATTCACAATGACACTAAGTCGGCTGG
RM20090701369_24AT	GGAGAGGAAGAAGAAGACATGGT[A/T]TGGATCAGGAGAATGAGGCTCTACATTATGGTACATTGGTCAAACATTTTTCTCAGT
RM20090701370_50AC	GTCCATGACCCTTTACCTCTTGTGTGTGGTCAACCCATCTGTCAAATGA[A/C]CACACAAGGTTTAGCTAGTGGCTGAGCACTC
RM20090701371_52AG	TGATAACCGTTCTAATGCTCAGCAGTGAGAAAACTAAAGCATCTCTCTGGT[A/G]AAATGTTGAACTTGGTTAGAAGCCAAAAT
RM20090701372_74AC	AAGAAGATTTTTTTGCTGTTGTACTTTTTACCCCTTGTTCTCCCCAATTTTCTTGATTTCCAATTGGTCGTTA[A/C]AGTCTTG
RM20090701373_25AG	GAGGCTATGGTGAGGGATGGACAG[A/G]GTTAGTCCTCCCATCCGTGTCTGATACATTATATACACATCTAACGGATAACAAGT
RM20090701374_60AG	GTTGGCTGGAGGCAAACAGAGGAGACTGGGCGGCCATCTTGGATTCCCAGACTCTGACC[A/G]GTGCAGCAAAGGGCCCAGGGG
RM20090701375_36AG	GTCTAGCCCAGAGCCCAGCCGTCTCCCCAGCCCTA[A/G]CCAGCCATGTCCCCTACCTTGAGGCAGAGTTCCTCCCATTGACAG
RM20090701376_69AC	GCTGAGGTCCTTGCTGCCTGAATGGGAGGCCTTCTTAGGCCGGGGCCGATGGTCCGGAGTCAGCTTGG[A/C]CACGTGGTCCTT
RM20090701377_30AG	ACACGGAACAGCACCACACACAGGTCAGA[A/G]GACATCCACAATGATCACTCCTGTATGCTTCTACTGTATATCCACTCTATT
RM20090701378_63CT	GAGGCAGCCTGCTGGTAGAGGCAGCCTGCTGGTAGAAAGCCCAAAGCTTTCCGTCATCATAG[C/T]GGCCTAACAGCCTGAAAC
RM20090701380_14AC	CGCACCTGTGTTG[A/C]ACTGCTGACCCAAACCCCCTCTAAATGAATCTCACAAATGACCTAATTAGGATTTTAATAACTGACC
RM20090701382_18GT	TCCTGTCAGACGTTTTG[G/T]TAAGGGCAGGATGAACAGTAATTCTTAACATCCATTATAATCTCATGCCGTGAGTCATAACTA
RM20090701383_5CT	CCGC[C/T]CCTTGCTGCTCAGTAACCAATGACAACCACCATACATTCCCTTCTGTGGACAACTGTTGCTATAGTTACCCTGCGA
RM20090701386_80CT	CCATGCATCTGTCTCTAAGCTAGAGAATGGAAGATGATATTATTGTATTACCCAGAGCAAACGCTTACAGCATCATTAG[C/T]A
RM20090701387_71AC	TATAGAAACAGCAGTTGGGAAATTAAACTTTTGTTTCAAATACTCAATGTTCATTGAATGGGAGTATATT[A/C]ACTTTCCTAC
RM20090701388_13CT	AAGTACGGTCAG[C/T]CCTGCCAACTTGTCCATTGTGAGCTAGCCACCATTCTAAACTCCCCTGCATCTTGCCTCAGCCTGTGC
RM20090701389_37CT	ACAGGCACACAGGAGCATTCATTTAGAATAGGCCCT[C/T]GCTGTGGCACCTTTAAAATTCCACTACTGACATATTAAAATCCC
RM20090701391_78CT	TCGTCATTGTTCCCTCCCATTGAATCAAAGTATGTGATACTCTTCTTACGGAGATCCACTACCTGCGAAGAGAAGGA[C/T]GTT
RM20090701392_63CT	ATTGAGACCATCAGCGCAATGGACAGAGACGAACCTCAGAGTGGACACCGCTTCTTCTTCTC[C/T]CTCACTGCAGAGGCTGCT
RM20090701393_16AG	AGCAGCCATCCCGTT[A/G]TTACCATAGTCAGAGTCGGAACGGACCGCCCCAATCCAGGTCCAGCCGAAGTGCCTGATGAGGTG
RM20090701395_36GT	GGTGCATGGAACCTGACTAGAAACCCTGGCATTTC[G/T]GAGCATCATCTTACATCATGTTAGCCAACTCAATCGGCCTTATCG
RM20090701396_2AG	A[A/G]CCCATTAACAGGTAATAATACACCTCTCGCTGTCCTCACCAACACATAACCACTACCCACCCTCCCTCTCTCTATCTGA
RM20090701397_66CT	CCGCCCAAACCTGACTCTGGCCTACTGGACGGCTTCATGACGGTGAGTCATCACTACAGCTACTG[C/T]ATGGGGCCAATCGGA
RM20090701398_3CT	CC[C/T]GAGGAGCGGGGCTTTCCTGCAGACATCCTCCTGGAGGAGATGATCCCCACGCTAAAGCTGGTCATCAGGGCAGTCAGG
RM20090701399_75CT	GGGTATCACATGAGGGAGGAGGATGTTTTCCCTGTAGCGCACAGCATTGAGACTGCCTGCAATGACAAAAAGCT[C/T]AGTCCG
RM20090701400_78AG	ACAATGACTGTTTAAATTGAATTAATGTAAATTATGCCTTTTAAAGTAAAATATTCTCAATTACATTTGACACATGC[A/G]TTT
RM20090701401_4CT	CCA[C/T]TTCCTGTACACCTTGATCACCTTCCGGGTCGCTGACGTCTCACAGGAGGGCAACAGGAAGGCCTGGAGCAGGACGAC
RM20090701402_44AG	CCCATGAAGGGCAAAGGCGCTGAAGGTTGTAACCCATTTTATT[A/G]GTAGCAAGAAAAAATGATCCACCACCCCAAGGCCTGC
RM20090701404_46CT	GAGGAGTCATGTGTCTAGAATCTAGAATCTAAACTGTAATGTTGG[C/T]GTACACATTTTCAGTAGACACACCTGGGAATTTAC
RM20090701405_53AG	GTTGCTATGGTGATGTGTGATGACCCTCTGGTAGTCCTCGGTTATGGAAGGG[A/G]TCATGCTGTGTTCCGTGACCCCAGGGAG
RM20090701406_52CT	GTTGGCTAGAGGCTAATAGAGGAGACTGGGCGACCATCTTGGATTCCCAGA[C/T]GGATGCAGCCAAGGCACCAGGGGACATCA
RM20090701407_53AC	CTTCTCTCCAAACCAGTCTCCTTTCCCCATGCTGCGGAGGTAGACAGGATCC[A/C]CGTTGGACTTGTCTTCCCTGGTCACATT
RM20090701408_49AG	CTTAAGTACTGAGTGTGGGGCAGGGGGAGCATGTTTAAAGACACACAC[A/G]GGGTCATCTGGAGAGAGGAGAGAAATAACAAG
RM20090701409_1CT	[C/T]GCTGACGGAGTGCTATGATGAGCTGGGGAATCGCTACCAGCTGCCAGTCTACTGCCTGTCCCCACCCGTCAACATGATCG
RM20090701410_27AG	GACTGTTCAGCCAGATGGGCAGCACT[A/G]CTACCCTTTCTGAAATTGGAAAATAATATTTAATCATGGTCCAATATTATTAAG
RM20090701412_50CG	TGACTGCAACAGAAACTCATGTAACCAATTACAGCTGTTCTTTAAAGAA[C/G]CTGGAAAAGTGAAAAGCAGACCAAATGAATT
RM20090701414_49CT	ACACCAGTGCTATCCCCCCTTCATATGTGTGGACCTCTGGAGGAAACA[C/T]GAGTGCAGGTACATAAATGATTGCAGGAAATC
RM20090701416_15AC	CTGATCTTCTTGAT[A/C]CCTGCTTTTTGTATCTGGCAGCTGATTTCATAGCCAAACCACTTACATATCTTTTCAATCTAACCC
RM20090701417_35AG	CTGGAGCAGCTATTACACATCCATGTTTACCATC[A/G]GAGGCTGTATGCAATAGAGAACAGCATCTACTGAAGACTTAGTAGA
RM20090701418_19CG	CTGTGTGGCTGCGGCAAT[C/G]CACTGATACAGTGGCGATGCCCTCTCTGCTCTGCCAATCAGGAGGGCAAGAGCCTGGTGTTT
RM20090701419_19AC	TTGTCTGTGTGTTCGGTG[A/C]CTCCTAGCACATCACTCCCGTTTCATCGTGTAATTAAAGTCATCCCCTGGGTTCTCAGCTCA
RM20090701420_2GT	T[G/T]TATCCCTCCCTCTTTCGATCCCTCCCTTCATATTTCACGTCTGTTTCCGTTCTCTATATCTGATAGCTTGATCACTGCT
RM20090701421_10CT	ATTGGTGGG[C/T]GGAGCTGGGAGGGTTGTCAGTGCTGATGGGGCTCGGCTGTGGCATAAAGCCACTGTTTCCCCATTCAGCAA
RM20090701422_52CT	GAGGGTTGCCTGGTCATGGACAACAGCATCATCACCCTGAACAGGGAGCCT[C/T]TATCCAATTCCATGCTGAACGGCTATCTG
RM20090701424_77CT	GAAAATGAAGTCAGGGAAGAAGAATACTGAAGGGAGCAGTAAAGTGCCTTGCTGAAGGGCACAACCTCCAGACAAA[C/T]ATTT
RM20090701425_66AG	TGCATTTTGCAAAAGCAAGAGGAAAAAAAGTCTCAAGAGAGTGAGAACAGAGAGGGGAAAGAGAG[A/G]AGGATAAAGGGGAGA
RM20090701427_5AG	AGAG[A/G]AGGAAGGATACAAGAACCCTACCCTTACAATAGCCAACAGCCTGGAAACCTGACGTTGAATTTCATTGAAGCACGC
RM20090701428_80AT	GAGGGGTTGGAGCGACCCAGCTCGTCAGACGGGTAGCCGCTGTAAACTAATCAGGCTTCCGGCACACCCAGGTGCACAC[A/T]C
RM20090701430_75CT	CGCTTTGGCTTCTCCAACATCAGCAGCCTGGTCCACAGCACCCAGATAGACCTACAGCAGGTAAACATTACACA[C/T]ACACTA
RM20090701431_53GT	AGGAGTTACATGGCACCTTTAGAATGCGCTCTTTCTTCTCTTGTTAGACCAG[G/T]ATGGGACTTGAAAACCTGATTGTGTCCT
RM20090701434_77CT	GAGTTCAATAACTACAGGCAAATGTATGGTGAGATGCCGGAGTAAGCTTTCAAAAGGTCGGTAGCCTACAGAGTAA[C/T]ATGA
RM20090701435_20AG	GGGTACCACATTGAGGGAC[A/G]AGGATGTCTTCCCTGTAACGCACAGTGTTGAGATTGCATGCAATGCGATGCTGTGACACAC
RM20090701436_48AT	GTTGCTGATCCCAGTCATCCCGCCGCCACCCCGCAAGGGCTCTGGAG[A/T]GAGAGACCCCAGAAGGTTCCTCCTATCCGGGAT
RM20090701437_42CT	ATCAGACTCACCTGTACTCCATCACTTCCCTGATTACCTTC[C/T]CTATACAGTGGGGAGAACAAGTATTTGATACTTACAAAG
RM20090701438_80CT	TTGAGCAGACCCAAAAAGCACCTGAACAAGATGACTGTGATGATCCCAGGAGTGATGTTTCGCTACAACTAGAGGTCGA[C/T]C
RM20090701439_72CT	ATTTCCAAGGGTCTTAAGTAAAATGACCGCCATAAAGACTACAAGTTTTCACGCGTAGAAAAAAGTTATCA[C/T]GCGTAGAAA
RM20090701440_24AG	GAAGCCAAAGTTGTCCTAACGGA[A/G]GGAGGGAGCAAGGGAAAGAAAGGAGTGAGGTGATATATGGGGTTGTATCTAACTGTA
RM20090701441_72AG	AGAAGGGGATAATAAGGAACACAGAAGGAAAATTTGTTTTTATAGCTATTGTTATTCCCAGAACCCAATAT[A/G]GTTGTAGGA
RM20090701442_12AG	CACTCACACAC[A/G]TTTGCACGTCTTGCGTATAATTGAGCAGGGGCTAAAGAAAGAGTTGTGGTCAAGTGTGTGGTGACATGG
RM20090701443_39AG	AAAATAAGCATTATTGTCGGTGTGCTTTTGCTTGTTTT[A/G]TAGGTTTTCTTATTACTTAATTTGACCTCATGAGCTTTCTTT
RM20090701444_72GT	CAGGCAAGACTGAGACCACCAAGGATCTGGCCAAAGCTCTGGCTAAGCAGGTACATGATCATTTTGTATTT[G/T]TTAACCTTT
RM20090701445_55CT	GAGGAAGGTGTGGCAGAGGAGGAAGTGTTCAGTGAAGGGTGGCATGCTCACCAT[C/T]GCTCATGCTACGGTGAGTGGCAAAAC
RM20090701446_72CT	TAAATAAAGAGCCCTTTCACATTGTGTCCTTCTCACATTTAGTTTTAGCCTATCGGTCAGTCTGACCTTTT[C/T]TGTTCCCAC
RM20090701447_17CT	ATGTGTAGTGATATTA[C/T]ATCTGTGGGCCTGACTGAATAACCACCTGACCTCATAGTACCACCACTCTGAGAACAGAGATGG
RM20090701448_76CT	GAGAGGAGAAGAAGAAGAGTGGAGAGGAGGGAGGAGAGACATCTTCAAACATCCTACTTAATAGTGATTAGACAG[C/T]TGTGT
RM20090701449_57CT	CATCCTGACATGACCCTCCAGCATGACAATGCCACCACCATACTGCTCATTCTGTG[C/T]GTGATTTCCTGCGAGAAAGGAATG
RM20090701451_20AG	TAAAGCAACAAATCCCATC[A/G]TTCTGATTGCACTTCTCCTCAAAAGGCCACTAGAACTGAAGAAACAATCCCAGTTTCTCAT
RM20090701452_22CT	AGAGATTACTGCTGCCATATG[C/T]TACTAAGAGCCATCCATGTATAGAGTTTGTAGGCGCTAACATGGCGTCCAGTGTAAAAG
RM20090701453_29AG	GGAGCTGTTTGACTGGCAGTCTCCCCTC[A/G]CCTCAGGCTTCTACAGCGCAGCTACTGCAAGGTCTTAAGAGCCCTCTTGGCA
RM20090701454_55AG	AGAGCAGAACAAAAACAGAGTACGGGTTGAGCAAGGAAACATAACAAACACACA[A/G]AGACAGCTATCAACCTATAGCTCCAA
RM20090701455_23GT	TGTAGCGTAGCACAGGCTTTTG[G/T]TTCCGGCCTAGCACTAACACACCTGACTAAAGACCATGATGTGGATTATAGTATTTGT
RM20090701456_52AC	AAACAGATCTATCTCCCTCTCTCTCTTTGAGTTCTTTGCCTAAACTGAGAG[A/C]CGAGACACTTCACGACTCCCAGAGAAAAA
RM20090701457_73AC	CGTCACAGTCATTGAGCAACGTTGGTACGCTGGGAGGCCCCGCCCCCGGAGCTCAGCGAATTTTCCCCCAGA[A/C]GCAACAGG
RM20090701458_34AC	GGGGCATTGCGTCTTCTGACAGGCCCGTGACAG[A/C]CTCTCCCCCTTGGGGGCTGAAACGCGTAGACGTCAGAGGGCTGACTG
RM20090701459_12AG	GACAACGATGA[A/G]GTGCAGCGCTCTGTGCAGCTGCTGAAGAAGAAGTGTAGCAGACTGACGGCTGAGCTGCAGGACACCAAG
RM20090701460_74GT	GTTTTGCCTAGAACTCCGCTCACATGGACGGAGACCTGGGAGGATGGCTGTTCTTCTTAAAGGCTGCTTCAAC[G/T]GTTGAAT
RM20090701461_17CG	GAGTTGGACCGGGGAG[C/G]AGAGAATGGTAGAGGACAAGACCCGGTCACTGAAGCCCGAGAGGCAGCCCCCAAAAACTTTTTG
RM20090701462_18AC	TAGACTGACCTGCCTTT[A/C]TGACCTCACCTTCCACAGTGTGTCTGCTACTTATCTGATTCATCCATTGTAGTAAAGCAATGT
RM20090701463_35CT	GGTAGCTCATGCCCAGCTTTAGGTTTCAGGTGCA[C/T]AACTAGCATGCGCAACAGTGAATGTTATGTGTGTATTACAAGAGAT
RM20090701465_35GT	TACTTGGCTCGAGACTGCCACAATCTCACTGGGA[G/T]TGCGTCCCAACCCTATTTCCTAGTGCACTAATTTTCACCAGGACAC
RM20090701466_28AC	CAGAAAGAGATGAGACAGTCTCAGAAA[A/C]ACAACGTCACACACGAGATAATGCAGTCTCCAACTAACAACATCGTACACTAC
RM20090701467_9CT	GTCAATCA[C/T]GTAACCTCTCACTCCCTCTCTGTGCCATTCAATGTTGTTGTTTATGTATGTAGCTAGTGAGCTAAGCTGTAG
RM20090701468_49AG	TTATAATCGATGTTAAACCATTACTATAGAATACATGTTGAATGTTAG[A/G]TATTTGAAAAAAAACAAGGCTAAGCAAAACTA
RM20090701469_30CT	GACCAAGGGTCCCCGGGCCCCAGAGGCCC[C/T]CCTGGGAACACAGGCAAGGACGGGCCCCGCGGCCCCGCTGGAGAACAGGTA
RM20090701470_15CT	TGGAGATCTACAGG[C/T]TGTGTTTAGTCTTATGTAGTGGTATTAATGCTAATTGTTTCTAAACTGCCTGTGAGAGGATCAAGT
RM20090701471_7CT	TTAAAT[C/T]AAACCCTGATCTAGCAAGTCTGGTTATACTAAGTAGCTGCCCAGCAGGACCGTGATTAGCTTGATTAGGACTGT
RM20090701472_56CT	TGCCTTGTCCCCTCCTCACCTCCCCCTGTAGTGCTGTTCATGTTGCCCTTGACCA[C/T]CGAGCCCTCCAGCGACTGGGACTTG
RM20090701473_67CT	GGCACCTGGAACAGGAGACGAGATACACTTCAGAATGCGCCTCAATTTGGAACAGCACACAGATGT[C/T]ACAGGGAATGGTGA
RM20090701474_73CT	GTTTTACGGATGCGAATGGGAAAAGAAAACAAATGTTTTTATAAAACTGGGTAAAAACTTTACACAATTCTG[C/T]ATGTGTTG
RM20090701475_27AG	AAGTGGACGGCCGAATAAAATCAGCC[A/G]CCAGTGCCTCCTCAATATAACTGTTCATGGCTGCAGTCTCTGGACCTCAGAGAG
RM20090701477_33AT	GGGTACCATATGAGGGAGGAGGATGTCTTCCC[A/T]GTAACACACAGCGTTGAGATTGCCTGCATGACAACAAGCTCAGTCCGA
RM20090701478_76AT	GTTCCCAGGACCACCGCCATCTCTTACCCTTCACCCCTCTGCACCCTGTGTTTGAGGTGGAAATTGCAAATGGTT[A/T]TATAA
RM20090701479_3CT	AC[C/T]GTTGACCGTGTGGAACTCTGCAGTCAGCTTCTCAGGACGCAGTGCCACCTTCTTGGACACCAGGGGGCGCTCTGACAC
RM20090701482_29AG	TCCCCAGGGTCCAACAGCACTGAAAGAT[A/G]ACAATACCACACACGCACGCATGAATGCACATACTCGCACGTGCACACGCTC
RM20090701483_56GT	GAGGTTAGAAAATAGACTTTACAAACATGACAGAGAACTCTACATATGGATATTT[G/T]TTTGAGTCAATTATCTGGTCAAGTT
RM20090701484_32CT	CATCCTGACAAGACCCTCCATTATGACAATG[C/T]CACCATGAGCCATACTGCTCGTTCTGTGCATGATTTCCTGCAAGACAGG
RM20090701485_37GT	CATCCTGACATGACCCTCCAGCATGCAATGCCACCA[G/T]CCATACTGCTCGTTCTGTGCGTGATTTCCTGCAAGACAGGAAAG
RM20090701486_20CT	TGAATAGAAGCAACAGTCA[C/T]GTCATATATGGAAGCAACAGTCATGTCATATATGGAAGCAACAGTCATGCACGGACAAAAT
RM20090701487_45CT	AGGTTCTTGATCAGCTCTTGTGGTGATCACTGGGAACTGAGCCT[C/T]CCCTGTAGGATTCTCTGGGCACCCCTAGTATCCCTG
RM20090701488_16CT	AGGAGAGAGAGATGA[C/T]ATGACAGAGCTGTCAAAACGCTCTTTCGGCTGTTGTCCATTCTTGTCTCCTCCCCTCGGACCCAT
RM20090701490_28AC	CTGCGCCTGTCCCATGAGAACAACGGT[A/C]AGTCTGGACGTCTATCTATGTACTGTCTTCGTACTGTCTACCTCTGTCTACAT
RM20090701492_63AC	GCCGGACAGACAGGGGAGAGGGGCAGTTGTCTGGGTAATATACCAGAGGCAGAGAAGCAATA[A/C]ATGTCACTTCAAACTCAC
RM20090701493_54GT	AGAAATGTCAGTGTTCTGCCATGGCCAGTGAAAAGGCCGGAACTCAATCCCTT[G/T]GAGCACATCTGGGACCCGTTGGATCGG
RM20090701494_5CG	TGGC[C/G]CAGTCCGGCAGCTGCCTGTTAATAAGTGAGTAGTACCCACTTCTAGAAATAAATATTTGAATTCTAGAAAGGCAAT
RM20090701495_27AC	GGGTACCACATGGGGGAGGAGGATGT[A/C]TTCCCTGTAATGCACAGCATTGAGATTGCCTGCAATGACAGCATCCGATGATGC
RM20090701496_65AG	GACCTCGGTCATCATTTCAACAGTGTTTTCATGGTGCGTGGTGCGTCTGGCTTCCGTTTTCAGC[A/G]GGCAGATGTTAAGGAG
RM20090701498_35AG	CATGACCCTCCAGCATGACAATGCCACCAGCCAT[A/G]CTACTCGTTCTGTGCATGATTTCCTGCAAGACAGGAATGTTAGTGT
RM20090701499_6CT	CAATC[C/T]GAGTGACACAGATTAGCGTGTCACTGTTCATGACCGTGACAACTGTCACCGTGGTGGCGTCTCTGTGGGGGTTTG
RM20090701500_48AC	TAGTCAGATATCATTTATTCAATGCAGAAGATACAAAATAACTATTT[A/C]ATATGTAATTCATAGTAATAGACTACATTAGTT
RM20090701501_46AC	TCATTTGGATCTTGGGCTAACTTGTTATGTACACTACCTGTCAAA[A/C]GTTTTAGAACAAGGGTTTTTCTTTATTTTACTATT
RM20090701502_34AG	TGAAATATGCTACTCTTTGTTTACTGCTGGTGC[A/G]ATCATCAGATAATAGCTTCTTATGCTTTCACCGAAAAGCCTTTTAAA
RM20090701503_60AC	GAGCCAGATAAGTAAAGTTCCCAATTAAATCTAGTTACAGTAATGGTCAGGAAATAGTT[A/C]AAATGTGTTACATGATCAGTG
RM20090701504_61CT	TGCTGTTCTGTGCTGAGAAAGGAGCGGCGACCGAGATGGAATTGCTCCCTGGAAATGTCA[C/T]ATCTACGCTACAACTTAGGA
RM20090701505_10AG	GGTTGAGGA[A/G]CTGACCTGTGCTCTGCGCTGTAAGGAGGCTCTGATCACTGAGCTGAGTGGACAGAAGAGCATCCTGGCCCT
RM20090701506_13AT	ATTGGATGTGCG[A/T]ACACTGTGTTTGAAACTGGGCTGAAAACATGAAAACTCAATGCGGAAGTGAAAATATTATTTCTAAGA
RM20090701507_41AT	GAGTTAGAATAATTCAAGCCAATACCACTTTGCATTGAGA[A/T]TGGTTGGTTGTATTATAGCTAATAAATAAATCATTGATGA
RM20090701509_22CT	CTGAAAGAGATCATTGCGGTG[C/T]GGTCTGCATTTTTCATGCTGCAGGCGGTCAGACAAATTACTTTAGGATGAAAATATTTT
RM20090701510_74CT	ACAGGACAGGTTCAGTATGTCAGAGTGGACTACAGTATGTCTGTCAGAGAGATGAATGGTAGGGACAGCAGTC[C/T]CAGGGTT
RM20090701511_13AG	CAAGTTAAAAAC[A/G]AGCATATTGTATTATCAAACATCAACAAACTTGCTTTGAGAGAAACATTTGCATATTTCACTCAGCCA
RM20090701512_40AC	ACAGCACAGTCAGGAATGGGATCAGGCCTGGACAAGACC[A/C]TGATTAGGGCCAGGAGTTTCACCAGACTTGATCAGGGAAAA
RM20090701514_48AC	GTTTCGAAATGTAAGTGGCAATGTTGTCCAATTCTCTGTGTCTTAGA[A/C]CCATGCTATGTCTCTTTCTTCTTCTCCTCTCTC
RM20090701515_44CT	ACATGTTAGTCGTGTCTTTTCTGGCTCCCTGAATGGTGGTCCA[C/T]GTTGTCTTATCAGTTACCTTCGTCTGGCCTGGCTGTC
RM20090701516_44GT	AGATATTAATTATTACATAAAAACATATTTGATAAGATGTAAA[G/T]GAAAATGTCCAAATATATTTTTGGTACTCCAGAAATA
RM20090701517_24CG	CACCAATCACAAAGCATGTCTCT[C/G]ACAAACCCACCAATCACAGGTCTCGTGGGCTGTCACCGTGCAGGGTGGTTGGCTCAA
RM20090701519_17AG	GTGCTGTCTGTCATTG[A/G]CTCAGCAGGTGAAGCCTATTTTATTCTCCAGCCAATTAATTGCATGGTCTGATGGGGAGGTTAT
RM20090701520_57CT	ACCTGTGATTGACAATCGATGACAACCAACAGTACTGGGGCCTAATGGAACTGTTG[C/T]TGTTTTTCCGTGATTTAGCCAACT
RM20090701521_81CT	AAGATTCATCCCAATAACATCTGCATAATAAGGACCCACCCCTATCATGTGGACTCATACACACACTGTACATAAAAACA[C/T]
RM20090701522_72GT	GAACAGAGATGTACTGTTAATTCACTGAGCTCTTCAAGCAGGCAGAAATGACCTATTAGAAAAATATACTT[G/T]TATTAGTCC
RM20090701524_13AG	TAAAGAGTCATA[A/G]CTTGTTATAAACACTTGTGAGCCTTTATAATGTCTTATGATAAGTAAAGTAAAAAGCAGTGGTTGCCT
RM20090701525_11CT	AATGCCAGGG[C/T]GTGATCTATAGAGGCCATCAAGTGACACCCGGAGAGGCACTGCAGTCTGTCTCTCTTTAGGATGATTGGC
RM20090701526_21AC	CAAGCACCTGCTGACTGAAA[A/C]AAAAAGTTCAGGAACTTGTGTAACCAACTCAGGAACAACACATATTTCAACATGTTTTCT
RM20090701527_46CG	AGAGAGGGCATGCCTCCCCATGCCAACCAATGTCAGGCTACTCTA[C/G]CCAGGCACTCTGCACCCTGACAATAAGCACAGGAG
RM20090701528_72AC	TACCGATGAGCAATGCATTACTTTTGTAATGGACCCAATGGCAAGTGTGGTTCAGTTTGAGAGATGGAGTT[A/C]AATCTAGAG
RM20090701530_63AT	TCTATTGCATTCCTATGTAGGTATAACCAAACGGGTATGAAGTGTGTGTGACTCAACACTAG[A/T]TGCCCTTCGAGTTAAAGC
RM20090701532_37AG	TGGAATGGAATGGGACCGTCATGAACTGTAGATGTC[A/G]TGAGCTAAGGCATTCAGATAATAATGTTGTGTTGTTTTGTAATA
RM20090701533_51AC	ACAGAACATGTCCTTGATGGGCATCTTTCCCGTCTGAAACACAAAAAATA[A/C]ACTCATCATGTGTGTGTAAGGACACTACTC
RM20090701534_49GT	CAGGCACACGCCAGTGGGATGGATGGACAGTGATCACTCTTGGGTTTC[G/T]TCTCCCACTCACAAACATAGGCCACCTCCATC
RM20090701535_28AG	CATCCTGAAATTACCCTCTAGCATTAC[A/G]ATCCCACCAGCCATACAGCCCATTCTGTGCGTGATTTGCTGCAAGACAGGAAT
RM20090701538_2AG	C[A/G]GTGTCGCCCCAAGGCAGAGTTTAACCTCCGTAAACTGGACTGCAAGGTGCCCTCCAAGGCCAGAGTAATACACAAGTCC
RM20090701539_37CT	ATGGCATCAGACGACCACCGCTTCCTGTCCAGCTCT[C/T]TGTACAGCACAGGTGTTCTGGTGGCCTGGGACCCTTCCCCCTTT
RM20090701541_67AT	GCAAAGTAACTGTGGCAATTGTACTCTGCTGGGGGGATAAAACTGTGTTAAGTGGCTACAGATTTG[A/T]GAGAGAATGGTCAT
RM20090701542_21CG	AAAAGCTGTCCCCCAACAGA[C/G]CTGTTGAGTGAGGATGAGTGAGGAGGACATGCAGGTTCTTCTGCAGGCTAAAAGCTGTTA
RM20090701543_33AG	TGTGTGTGTTTCTGTTTTCACGAGGTCATGAA[A/G]GGGACAGTCTTTTCATATGATGTGGTCAATATTCCCACTAGGTGGAGT
RM20090701544_27AC	AGTGACGTAAGCCTAGATTATGATTT[A/C]ACGTTTTCATAACGGGCTCTAACCCCCATCCTCTGGTGTAGGATAGATGTGGTT
RM20090701545_18GT	GCTTTACATTCCCATGC[G/T]TTTACCACAGACCGTCTGGATTAACCACAGACCAATAAACATGACATCATTACATACCCATTG
RM20090701547_28AG	TATGTTGAACACAGATTATAAACATGA[A/G]CTGAAAATAGCCTTAATTCCCTTTTGATCATTCTGTGTGAGCAGCTTCCTCCA
RM20090701548_75CT	TCCTACCAGTGAACAATATATTGGGTCTCACACTGTAGAGAATATGAATAATCTGATGCTTGGTTATGAATGGA[C/T]GCGCAT
RM20090701549_80AG	AGAGACGGTCACCTGACAAACATGAGGCAGGAGCGCAGGAAACAGTTGGAGGAGATCCTGGAAATGAAGTATGCCACAG[A/G]A
RM20090701550_7GT	TAACAG[G/T]GGAAAGCACCACACCCAGGTTTACGTCGTCGAGATGCAGAAAGGAGGAACACTACGACGTAACTGTCGCCACCA
RM20090701551_57AG	GACAGTCCACAGAGCATAAGTCCCTTCAGACCTCCCACAGCACACAATGAATACAG[A/G]GAAACACCAATCACTATGCATACC
RM20090701552_75AT	CATCCTGACATGACCCTCCAGCATGACAATGCCACCAGCCATACTGCTCGTTCTGTGCGTGATTGTCAGAGAAA[A/T]CCAAGA
RM20090701553_25AG	CATCCTGACATGACCCCCCAGCAT[A/G]ACAATGCCCCCATCCATACTGCTCGTTCTTTTTGTGATTTCCTGCAAGACAGGAAT
RM20090701554_56AT	TGTGCATGAAAAACACAATGCAGCTGGTAGCCTACCAGATGGTCACATCCCAAAT[A/T]GCACCCTATTCCCTATGTCCCAGGT
RM20090701555_56AG	TGAAATATGCTTTTCTGTCTTTGTTTACTGCTATCCTCAGATAATAGCATCGCTC[A/G]CCGAAAAGCTTTTTGGAAATCTGAC
RM20090701556_66AC	AAAAATGGAAAGAATGATAAGTCATTCATTCTAAGGTATGAGAAATTCTATAACAAAATGGTTTA[A/C]TATACAACCATCCAG
RM20090701557_47AG	GGGCAGACACACACACATATTAGAGCAGTTCATGATCACAGCTTAA[A/G]AACAGAGCATGTCCCTATTAGTGGGTTATTTTAG
RM20090701558_79AC	CTACACAAAACGCAGAAATAAAATATAAAACATACCTTATCTTTGCGAGCTTCTTTTGTTGGCACTCCAATATGTCCC[A/C]TA
RM20090701560_49AG	TCACCACAGCCAGACCACGCAGTCCACTCACTCAGCACACAGGACACC[A/G]CTAGGAGGGATGGGGAGGACAGGCAAGGCCAG
RM20090701562_74AT	AGGTACAGGACGGACAGCTGATCATCCTCGCAGTGGCAGACCACGTGTAACAACACCTACAAAGGATCGGTAC[A/T]TCTGAAC
RM20090701563_64AG	GGGGGGTCCCTGAGATCCAGCACCACCAGTTGGCCCAATGGCTCCCTGTCAGAGAGGAGGAAC[A/G]TGGAGTTAGAAGATGGC
RM20090701564_3AC	AA[A/C]ATACTGTGTGGAGCGTGCTGAGCAAGCTTGGGAGCTAACTAAAGTCTGACCAGGTCTCTGGTCAGGTTACACATGGGA
RM20090701565_12AC	TCGATAGTTTG[A/C]AGGTAGACATATTTGGTGAGCAACGAACATATTTTGACATTATAACGCTTGCAGAGGTGGTGAATTGTA
RM20090701568_41CT	GATTGCAGGCTTACTTTCAATCCCTAGACACTGATTTAAC[C/T]CACAAATGTCACCTAAAAATCAGGGAAAGGATTAACACTT
RM20090701570_6AG	ATACC[A/G]CACAGAGATACCACATATTGTAACTCTTTGGGAAGGAGTCAGTACAGTGCATACAGTGCATATCCTCAGTGGGAA
RM20090701571_11AC	ATTCAATGCT[A/C]TAGGGGCACAATAACTAAAAACAATCTTCCCGGACTCGTGGAACCTCTAGAACCAGCCAGTCTTGAGAGC
RM20090701572_65GT	GGGAGGACTTGGCTGATGCTTAGAGGGAGCAGGAAGGACGATGTGGGGATAGGCTAGCTAGCGC[G/T]GAGACCCCAAACATGG
RM20090701573_80AT	CTGAGCACTATATGGTTAGCCGTTATATTACAAGGGTCTACCTTCTGCACGCACTGTAGCAGGGCAGTACACTGGGGAG[A/T]A
RM20090701574_49AC	ACACAGCAACTGCTCCCTTTGGACAGCCTCCTGGAGGACAAACGCACA[A/C]ACATGCAGACACATCCAGACGCACAGACACAC
RM20090701575_75AT	ATCTATGAACGTTTGAACATCTTGAACAGTTTGAACATCACACACGCAAACCCTCGGTCTCAACAGGACCTCTC[A/T]GAAGAG
RM20090701577_28AG	GCTTTCTGCTGTTTCTGTGGTTGTCAT[A/G]TTTGGTATGGCTTTGACAAAGAAGTTGAACAAGAAACAGATCTGGCTACCAGG
RM20090701578_72AG	GGGATGGCTGGGCTGTGTACACTGCATAGTGGTTCACAGTGCTCTCCAACTGGGCCAGGTCAGTATGACAG[A/G]CCACTTGAA
RM20090701580_14AC	CTACACAAAACGC[A/C]GAAATAAAATATGAAACATGCCTTACCTTTGACGAGCTTCTTTTGTTGGCACTTCAATCCTTTTGTT
RM20090701582_47AC	TCTGCTAGCTGTTTGAATCCCCATACAGCTTTTGAAAGTGAAGGGT[A/C]TGAGTGGTCTGTCTGCCCACACAGGGGATAAAGA
RM20090701583_38AT	GCAGCTTCATCAGGTGCATCTCTTTGTCCAATTCCCT[A/T]ACTGCTGGATAGATGGGATGTTGTTCCATCGCTTCAGATCATA
RM20090701584_75AC	CTCCAATATGTCCCATAAACATCACAAATGGTCCTTTTGTTCGATTAATTCCGTCGATATATATCCAAAATGTC[A/C]ATTTAT
RM20090701585_1CG	[C/G]TTTGAATGTTGTGATTGAGTGGGGGGAAACAGCTGCAGGCAAGGTTCTGACAGATGGGTGTGTCTTGGTGGTGACAAGGA
RM20090701587_9CT	TTGGAGGT[C/T]GTTCTCTGCTGCCTCCTCATGCTCCCTCAGCTGACTGAGGGCAAAGGCCAAGTTACTGAAGCAGCGGCCCTG
RM20090701588_30AG	CTCGCAGAAGCTGCGGCAAGGCCAAGGCG[A/G]TGGCAGTCCCCGGGGGCACCTGGGCAACAGCAGCAGGCAGAAAAACCACTC
RM20090701590_61GT	TCTAAGGGCTATCCAGGGCCACAAGGACAGCCTGGAGAACAGGTGAGTCGTTAGCGTTCA[G/T]TGGGTCAAACTTGTCCCTTT
RM20090701593_37CG	GAATTCTGAAACAAGAGCTCATTACAACCTGCTGCA[C/G]TAAGGCTCTGGTTAACATCTCCTACTGAAGGACTGACTGTATCC
RM20090701594_46GT	GCTCCACTTAGTCTCCAGCATCTTGTTCTGCTGTTCCAGGAAGCG[G/T]ACCTGTGTGTAGAGAGAGAAATATAATAGTTACAA
RM20090701595_10AC	AGACTTACC[A/C]AGTAGTTTCTTCCAGGACTTGATGAGTGACTTGGCCAGGGTCTGGACCTCTTCCTCTGAACTCTGCTTCCT
RM20090701596_3AC	GT[A/C]GTGATTGCGCATTAGTTCATTATTTCGATTTAAATTCACAATAGAAAGTAGGCTACCTTGTACGAGAAACTTCGCTTC
RM20090701597_71AG	AGAGCGTGTTCCACGACGTGCAGAAAGGATTGTGGAAAATTGACTGATGAGCGCAAGCATGGTGCAATAC[A/G]AACTCATTCT
RM20090701598_30AG	ACAGATTTATTTAGACCCCTCCCCCCACC[A/G]AATGTCTCCCCCGCGCCACTCTAACCTTGGGCACTGGAGAAAGAGAGAGCG
RM20090701599_15AC	GAGCAGTGTACCCT[A/C]CCCTCACGTTGTGGTCTACTCACAGTTTAGGGTCAGCTCTCTGTCTCTCCTTCTCGACTTTCCGGG
RM20090701600_30CT	TTGTCTGTTACTGATAGCGGAGACAGCAG[C/T]GGAGAGTCCAGCGACGCCGAGGAGGAGAGTGAAGAGGAGAGCATACACAGC
RM20090701601_71AC	ACACCCTTCTAGCGCAAATCATTTGCAATGATGAAATGACTGAAGCTTAGCTATCTGAACACATCATATA[A/C]CACTTGTGGT
RM20090701602_57AG	GGGCGGGGGGTGAGCGAGAGATTGAGATGTGAGCACCATGTACGTACCAGAGCACA[A/G]AGCAGGTCGACGGACTCCAGCACC
RM20090701604_79AT	GTAATCATGGGAGAGAAACAGCAATTACAGCACTGAGAGCTCCAAACAATTATGACACAACCAATAAAGCAAAAAATT[A/T]AA
RM20090701605_39AG	CCTCCAGCTCCTGGCAGGAAAAGTCAGTAAGTCACATA[A/G]ATGAAATACTCAGCCCCTATTGAAGAACTGACTTTGCACCTA
RM20090701606_54CT	GTTACCTCTGCTTCTCAGAGGGGAGACAATGGGTGCTGGTGAGATCAACACAG[C/T]GTGCGTTGATTTCCTAAGACAACACAT
RM20090701607_21CT	GGAGGCTCCCAGGTGATCTT[C/T]ACCAACCCTCTGGAGATAGTCAAGATCCGTCTCCAGGTGGCCGGAGAGATCACCACGTCC
RM20090701608_25AT	GTCCCCAGTGTGCTGGGCATAGAG[A/T]AGAGCCATGTACTTGGAACAGAGTGGACTCCTGTAGCTCCTATCTCTGTCAGCTAA
RM20090701609_69AG	TGAAATATGTTTCTCTCTTCTGTTTAAGGAGGTGCTATCCTCAGATAATAGAATTGTTTGCTTTCGCC[A/G]AAAAGCCTTTTT
RM20090701611_71GT	CTCTCATCGCATAGCTCTCATCCCATTACTTGCTTACAGGTCAGAACACCACACTACACACAACACACCG[G/T]CAGTAGAACA
RM20090701612_1GT	[G/T]ACCTGGAGCCCCAGGTCGGAGCCCCGTTCGCCATAGGAGGGGGCCTGGGAGAGCACCCCCCGGTGGCCACACAGGGTCAC
RM20090701613_73CT	GTACATCAACCCCTTTGTGACCTTCCTGGACCAGAGGAGATGGAAGTGTAACCTGTGTTACCGGGTCAACGA[C/T]GGTGAGGA
RM20090701614_10GT	AGATATATG[G/T]AAGTCTAAAACTTGTGAAATTGAATGGTATTCTTGCCCAAGAAATGAGGCACCCCACATGGCTTCCAATGT
RM20090701615_32CT	CACACTGAGAACTGGTCAGGATGGCGCTCCG[C/T]CTACGTGTCCGGTTTCGGATTCCCTGACAGGAGGCCTGGCCTGAGGGGA
RM20090701616_23AT	GGCCTGCAGCAGCATGGCTGCG[A/T]TGGTAAGGCAGCCAAGAGAGAAGAGGGACCCATGTGTGGCTTTCAAGTCTGCATCAAA
RM20090701617_44CT	CTGATAAGGACGCCTATAGAGAGAACGGGGGCCTCCTGAGCCC[C/T]TTTCTTTACCAATCATGCGATGACAGGTGTTAAAATC
RM20090701618_76CT	GCCTTGTCTGAGACGGTCTCTCTTCTCAAAATCATCATCACCACTCTGATGACAACCGTCGAGTCACACAGAAAC[C/T]TTTCC
RM20090701619_49AC	TAACACTCCAAATGGATGGCTCAGAAATAATTATTTTGAACACACTTT[A/C]ATTATTATACTCAGGTAGGCTAAGTTACCTTT
RM20090701620_59AG	GTTGACGGTGGGCGGCAGCTTCACCTGCAGATACCACTGATATCCTGAAACAGAGGAG[A/G]AACACACAGAACAGGTCAGACA
RM20090701621_56AC	CATCGGGAGGTGTTGGGTCGTGGTGTAGGGACTCTTGGATGGATGCTTGGATTTT[A/C]CACTGTATGGGTCCCCTGACACAAG
RM20090701622_30AG	GGGTACCACATGAGGGAGGTCTTCCCTGT[A/G]ACGCACAGCGTTAAGATTACCTGCAATGACAACAAGCTCAGTCTGATGATG
RM20090701623_79CT	CCAAATGGACATGTCGTCAGGATGAAATGAGGAGAAAACGAGCATCATAAGAGGTCGGAGTCTTGGCTAAAGAAAGTG[C/T]AG
RM20090701624_68AG	AGCGCTGGATTTCTTATTTCTTAACATGCTAAAAGAACAGCGGAAAACTAGGAGACCACCAGTCCTG[A/G]CGTTGTTACGGTG
RM20090701626_12AG	CAATGCTAGCT[A/G]ACACGCTCCCTGTTATAGTAACACAGTAGCAGTTCACTGTTTTTCTCTTTGTGAGTTTGCCTAGCATGT
RM20090701627_72GT	TTCCATCTGTTAATGTTACCAGTGTTTCCTCTGGAAAAAATTGTAGCAGTGGGAGGAAAAGGTCGGGCCAA[G/T]AATGTTTAT
RM20090701628_66AC	AACACGTCCAGAGTTTCACTGCTAAGGCAAGTTACACAAAACTGTCGTACATTTTATGTACTTAA[A/C]GTTTTGTTGTGCAGT
RM20090701629_49CT	CTAACCACTGTGGGGTGAATAATGGAGGATGTTCTCATCTCTGCTTCG[C/T]TAAGACAAACAGCTTTGTATGTGCCTGCCCTG
RM20090701630_12AT	TCAACGGGAAG[A/T]TAGGAAAGAGGGTGAGACTTAGTGAGCTGTGTGACATTGTCGTCATGCTCCACAAACTCTATACAGATG
RM20090701631_72AG	CTGCAGGTACACTTACATTCCAATTTCTGCATCTCTGCAGCTCAGCACTGGACAGCTCCACTTAGTTAGTC[A/G]CAAACCTGA
RM20090701632_30AG	ACACGGTGACCTGATTAGATATGGTTAAT[A/G]AATAGTTTCCCAGCTCACATAGAGGGTCAATCAGATTATATCCATCACTGA
RM20090701633_10AG	AGGTAGCAC[A/G]AGAAAGGAGGATATCTTCCTATAAACGCAAATCCGACCATCACCCCTGGTGAGACAAAACCGCGACTTGTC
RM20090701634_11CT	AGCTGTCAGC[C/T]GTGTGCTATGACTGTGTTATGAGAGATGTGGCTGTGAATTTGGGATGAGGAGAGTATAGTCAGAGGCTAC
RM20090701635_35CT	CACGCTGGTCTGGCTGGCCTTACGGGAGATGGGT[C/T]CCCTCCATCGGCCCCCGGCCATCCTGCCCCGGTAGCTGGGCAGGTC
RM20090701636_27CT	CAGGGTGCCCTCCACAACCTGTCTGT[C/T]ACCGTGTGTGACTGCTCCAGGGTGGCCAGCTGCCGCATGCGCAGGGCCACTGGA
RM20090701637_27CG	AGGGAGCATGCCCCCAGGCTCCTGGG[C/G]TTCTGTGGGGACCTGTACGTGATGGAGAAGGTAATCCAATAGGAACACCCATTT
RM20090701638_13CT	CGACACAAAACT[C/T]CAATATGTCCCATAAACATCACAAATGGTCCTTTTGTTCGATTAATTCCGTCCATATATATCCAAAAT
RM20090701640_61AG	AGAGAGTGTACTACACTGGAGCCCCCTCTGCCCGAGGAGGAGTGAGTCACACTAACACGC[A/G]TACTATGTACATTATGTACA
RM20090701641_45CT	ATGGACATGGCCTCGCTGCCCCCACGCAAACGCCCGTGGCACGA[C/T]GGCCCGGGCACCGGAGACCAAGACTCCCCGGGAGCA
RM20090701642_3AG	CG[A/G]TACAGGATGGCAACAACTGCCCTCGTTACATCAGGAACGCACAATCCCTCCAGTGCTCAGAATGTCCGCAATAGGCTG
RM20090701643_42CT	CTGCTGCTCTGTTTTGGGACTGCTACACGAGCAGCTTGTCG[C/T]GAAGGCAGAACCAGTCAGTGAGGTTAAAGGTGAACGGGT
RM20090701644_50AG	ATGAGTGTGAATAGCTCAGGTGGTTATTGAAGACTAGGTGATTGAAGGA[A/G]AGGAAAACAAGGATTCTGAGAGATTTAAGAG
RM20090701645_29CT	GTTAGATCTCTATAGTGGAAAGAGCAGG[C/T]GTGTTCTCAATTGAGGATGGGTGGGTGAGCTGTTGGCTTTGCAGACCTCAGT
RM20090701646_66CT	ATTAAATTAGGTTACCAGGTTCATTTTTCACTAGGTTGTAATAATCCAAGCCATGTCATAAAGTC[C/T]GTAAAACATATATTT
RM20090701648_52GT	GAGTGATCAGGTCTCCCTTGGTCATGGCGATGCGGATCCAGCGGTCCTCTC[G/T]GTCCCTCACATCAAAGTAGGCCCTGCCAT
RM20090701649_49AG	AAAAAACAAGATTAAAATTAGTCTGTGCTCAATGCTCAGGACTATAAC[A/G]CATTAAGGAAGCCATAATCCATCCTCCATTGC
RM20090701650_74AG	ATATACTGTGGATGCAACAATAACACACAGAGTCATTATTATAAGATAGATGCAAATGAATGCATGTTGATCC[A/G]TAATGTA
RM20090701651_74AG	TGTTCTCCACGTACTCATCGTTTGCCAAAGCAACTCAATATGTTTTTGTAATCTGCAGGTTATATGCACTCCC[A/G]TATGGTA
RM20090701652_23AG	CACATGTTTGTGCTCTCTCGGG[A/G]CAGGTCATTTTTCAAGATGGAGAATAACAATGGTCCCAGTATTGAACCTTGTGGTACA
RM20090701653_53CT	GGCTGGTGGCTGAGAGAAGGGTCAGTGTGGAACATGAGCACCTGCTGAAGAT[C/T]AAACCCACCCGCTCTGCCCCCCAGCTGG
RM20090701654_61AG	TGACAGAGAGAAGAGCAGCTAGCTACAGAGTAGGTCTGACTGAGAGATGAGCAGCAACCT[A/G]CAGAGAAGGTCTGACTGAGA
RM20090701655_4CT	TTC[C/T]CTCTCATCCGTGAGGACGGTGTGGTGTTTGACAAGGGTGTCCTCTCGCACCATTTCTGATTTAATGGAAGATAATAT
RM20090701660_25GT	ATTGTTCTGCGCATGGTAATACAC[G/T]GTAATACTCTTGACTGTTCATAGCTCAACCATCTGACTCCCTGCAAAAGGACTCAT
RM20090701661_81GT	GACGTCTGGATGCTGTTGAGCCACAACAGGGGGACGTTGGAAGGGGGCATTTGCGAACACGTCGCCTGCCTCTTGTTCAA[G/T]
RM20090701662_32CT	TCCCTAGACAGAGTAGTCTACCTGGAGGTGT[C/T]CCTAGACAGAGTAATCTACCTACAGGTGTCCCTAGACAGAGTAGCCTAC
RM20090701663_59AG	TGGCAGCGGCATGGGTGCCTCTCATTCAGGTACTGCTCTATGGCACGCTTCAGGTGGA[A/G]CCTCTTCATCCCAGCACACTGC
RM20090701664_46GT	TCAGGAGTTATGTAAATGTGCTAAGAGAGCAGAGACACAGACAGG[G/T]ATGGTCAGAGAGAGCAGGACAGAGGAGAGAAAAAT
RM20090701665_67CT	TAAATAGTCCCATTATGACAGAACAGGCACAGTGTTCAGCCAGACTGCAGATACCTGAAGGGATGC[C/T]CAGCCAGTGAAGGA
RM20090701666_36CT	TGGCTGCCTCCTCTTCACACAGGTCAATGAGGATG[C/T]TGTCATGCTCCAGGCCTCTGCCCTTGTCTATGAACCAGCCCCCTG
RM20090701667_37AT	CTTGGAAGTAAAACTTGAAAAGGGAACAGCACTAAA[A/T]TACTATGCTACTGGCATTATTTTACAAAATTATTCTTGCTGCTT
RM20090701668_48AG	GAGTTGGCTCCAGAGACTGTGCTGTGTTGGCTTCCACAGCAAGGATC[A/G]GGGATATGGAGTGCTTTCAGAAAGTATTCATAC
RM20090701669_6CT	CTGCA[C/T]AGTAAGACCTGAAACTGAGTGCAATATAGAGGACTCCTCTGATTTGGTGTATAAAAAGTACTGCAATACTTTTGG
RM20090701670_28GT	CAGGTTGAGCTCATTGAGGTAACCTGT[G/T]ACGTCAGTGTAACACATCAGTTTTACAAGCCAATCCTCAAGCTCTGGGTAGTT
RM20090701671_38GT	GCATGGTGGTGGTGTCAGTGGTGCTTTAAATGACCCT[G/T]CTATCTCTATTGCATGAAACACTCTCCTGCTATCTGCTCTAAG
RM20090701672_40AG	AGTTAAATGCTCCCAGAGAGATTAATGAGCCTTAGTCTC[A/G]GCCCAGACCTGTTAAACGATCACAGAAAAATGAATGGCTTC
RM20090701673_39AG	GGACGGGTCCTGGGGACAACAGAGAGAGCAGAGAGATG[A/G]TGTAAGGAACGTGTTGCTATTAAGCCAGAGTACTGTGAATAA
RM20090701675_74CG	ACAACAGCTGCAGACCGTTTTTTTTAATGAATTGCCCGTGTTTAGTTCTGCTGTGTAGGAGGTGGGAGTCCAG[C/G]GGTGGTT
RM20090701678_27CG	AGAAGAGGCTCTACATCTCTATGGAA[C/G]CCTGGCAGAGAGGGACACAGAGGAATGGCCCTCCCATATTCCCTCCTCACCTTC
RM20090701679_32AT	CCACTGAATACAGTATGGCTCTCAAGCTTAT[A/T]ACATGCTGCCATGTGGCTTTGCTTCCAGCTATTGTTGAATTTTAACAGC
RM20090701680_79CT	AGTGGGGGATTCATCATGGTCTGGTGTGGAACTTAGTGGTGTGGTGCTCTTGTTGCTCCCTCCTGTCCATCCAGACTC[C/T]GC
RM20090701681_13CT	TATCTTATATAA[C/T]GGACCGAAGCACTAGAGCCTGAAAGCACCAGTTTATGTGGGCAGATAGCACCGAGTTCATTGCTGCTC
RM20090701682_70AG	TCTGTGGATGTACAGTCGTTTGACCTGAAGTGTCTGTCTCTGGGCTCTGGACTGAGGTGAGTCAATAAA[A/G]TTGACCTGAAT
RM20090701683_68CG	TATGGGGCTCTCTCAGTTCTCAGGACACACAGTGAAACGTCACAGTGTCACAAACAGAGGAAGAAAT[C/G]AAAAAAGACACCA
RM20090701684_16AG	GGTAGCTCCCCAGGA[A/G]CAGGGATGGAGAGCCATGTACTAGTCACTACCCGATTGGCTTTTTGCAACACATGGGCCAATCCC
RM20090701685_12AG	CATCTGAGTAG[A/G]TTCTCGAGGCAGTACGACCAGCTGGTGGCCTTCAAGCCCACGGGCTGGACCTTCAGTCAGAGGGTGGAG
RM20090701686_74CT	AACATGGTTGCCTGTCTTGTTGGGGTGGTGGAGCTTGGCTGTGTACAAGGCTATGGAGGCGCCTGATGGGTCT[C/T]GCACACT
RM20090701687_24GT	AGAGACTGTGTGATGATCTATAT[G/T]ACTCATTGTGTAGTTTAATTCCTGACAAAGTTCTCCTTCAGGCCATCCACTTTGCAC
RM20090701688_38AG	GACCGGGGTATGGAGGACCATGGGGACCAGAGGGGTA[A/G]GGGGCAGAAGGCTGGCCTGGTGGGGGACTTCCATAGGCCGGGA
RM20090701689_17CT	CAATTTCCTGTCACAA[C/T]CCCCCAGGGCTCCATGGTTACTGTCCTGTCACAACCCCCCAGGGCTCCATGGTTACTGTCCTGT
RM20090701690_72AG	CTCCACACACTGCTCCTACAAGGAGGGAGAGAGAAGGATATCAGATTTCCATTCATGCTGTTCACTCTTAC[A/G]CTGAAAATT
RM20090701691_32AG	AACATGTTTCAGTGTCTGGAGCTCCCGGTCC[A/G]GCTCAGTGGGTCTCTGGATGGCCTTTAGTCTCTGGCTTGACACAGGGTG
RM20090701693_57AG	TGATGTTCGGATGTACCGATCCTGTGTTGTCACACGTGGTCTGCCACTGCGAGGAC[A/G]ATCAGCTGTCCATCCTGTCTCCCT
RM20090701694_48CT	TCTTCACTTCGTCTCCTCTCTAATCCCGGCCCCCTCTCCGCCCTCAC[C/T]GCCATGCTCTGCACAGCGCCAGGCGTGTGACAC
RM20090701695_2AT	G[A/T]GGAGAGGATTAAGGGAATACTAAGGGATGACAACCCACAAGATGTCCTTATATGCAGACAATCTTCTTTTATAAATCTC
RM20090701696_69CT	GTACAGATTAATGGGCTTTCTCCTTCACCAGCTCAGGCCTTCTCAATCAAAACATTACCCTCAGGTGT[C/T]AAACACACACAC
RM20090701697_1GT	[G/T]GCCAGCAGCTGAGAGGGAGAGACAAGAACATGAAATCCTAACTAATGTACGGCTGTATAAGCTTTGACATTTAGGGGTTG
RM20090701698_73CT	TGTTGAAAATGATGCAAGTGACCTATTGAAAGACAAACAGAAACACAAATCCTATGATAACCTGAGTAGAGA[C/T]GAAAGAAT
RM20090701699_56CG	GAGACAGTCACACACTGATCACTCCACTCCCTACATAGTCAGGGCTGATGACACT[C/G]GCTAGAGCTACTGCATGGGGCCATA
RM20090701700_57AT	GCCTAAAATAACTTGTTTTCTACAGTATGGAGGAGACACATTTCAACTCTTTGAGG[A/T]AAGTGCTAACAGAGAAAGACTGGC
RM20090701701_72AG	AGAACAGTGGCATCTGGTAAGACAACGGGTGGCGGACTTTGTATTTTTGTAAGTAACAGCTGGTGCACGAT[A/G]TCTAAGGAA
RM20090701702_1CT	[C/T]GGTCACAGCCCCAGAGTATTTACAGTCATGACGAGGACTCTCCTCTTAATAAGCCCAGTACTGAGGGGCCTTTAAGACTG
RM20090701704_55GT	CATAAGTTTTGCCTGTTCATTGTAATCGACCCTTCAGCTTTATGAGCGACAAAA[G/T]AATTCCACTAACTGTCCACCATATTG
RM20090701706_72AG	CAGATAACCCTACCTCTTAAATGTAGCAGCTGGTATTATTACTGAACCTGTGGCTCACATTTTCAACTTCC[A/G]TCTCTTGAC
RM20090701707_15AT	ATGTTTCACTGTAA[A/T]AGGGAAGATGTAAACTCGGCAGTAGAAAACCTATACGGTATATTTGACCTTTCAACTTCCCTATCA
RM20090701708_32AG	GATGTGATGACTGTAGTGAGGAGTAGGAACC[A/G]GTCTGCAGGGTGATGTGATGACTATAGTGAGGAGTAGGAACCAGCCTGT
RM20090701709_38AG	AGAGCTATGTGTGTGGCTCCATAGAGCCATACAGGAA[A/G]CTGGACTACACTAAGAATGTCAACCCCAACTGGTCAGTTGGGG
RM20090701710_52CG	GAACGAGGCTTGTAAATGCAGTTGCACTGCAACTCTGCATACTGGAGTTGG[C/G]TATTTTGAGAAATGTCTCAGCAGACATTG
RM20090701711_1AG	[A/G]CTGAGATGGCCTTCAGAGTGCCCAGGCCTCAGGTACGTCTGTTTGGGAAGGAGCGTCTGGACGTCCCCCCGGCACCTTTC
RM20090701713_72GT	CAGCTCCAAGACCACAAGGCCCAGCTAGAGAACAAGGAGAAGGGCTGTGCAGAGCTCCAGGCCAGGGTGGA[G/T]GCCCTGGAG
RM20090701714_66AC	AATTCACAATTACAATAGAGCTTGTGTAGTTCAGGAAAAAGACATTCATGTTACATGGCAAGGGC[A/C]TTAAACCCTTCAAAC
RM20090701716_52CT	GAAAAATGCATATTACAAATATTTGAGTACTGACCAGACAAGTTTAAAAAG[C/T]AGTGTCAGTCAAAGGTATTAGTGTCACGG
RM20090701717_68AG	ATGATTAAATGCACAGAAATAGAATGGACAAATCATTGTCTTGAATGTGGATACCTTTCTATTCAAT[A/G]TATTTCTATGCAT
RM20090701718_43CG	GACTGTTTAGCGACTAAGGGCTAGCAGTAGCGTAATTTAAAA[C/G]CACTAAAGCTCTATGAAGCAGGAAGGCTATTAAGAGAG
RM20090701719_68CT	GTCCTGCAGTGTAGCCTAATGTTCTTCCTGTCAGGAGAACTGCTGACCTCAGCGCAGACAGAGACAA[C/T]TGCCCTCAACCCA
RM20090701720_52AG	TATGCGTCCTATCCCACTCAGCAGCTGCACTCTCTGCTGGGGCTCCTACTG[A/G]ATGATGGAGTGATATGTCTCTACAGCTAG
RM20090701722_44CT	CTTCTTCCTCGACTGCTTCACCTGGATGGGTAGGGAGGGTGGT[C/T]AGAGGTAACGGATGGGTTAGAGGGCAAAGCAGGTAGC
RM20090701723_49CT	GAAGAGTCTCTGTGTGATCTCCTGGATGAGTTCCTCAGACACGTCCTC[C/T]GGGAAGAACTTGGCTCTGAACTTAAACTGCAG
RM20090701725_65GT	CAAAAGGCTCCGCGATGTGCTCCAGAAGGATTTTCAGGGCTTGGTGATGTTGTTCGAGCAGGGC[G/T]CCTTGGCTGGCGAGGG
RM20090701726_29CT	TAACTGACTCAACTAGGCCCTGTCTACC[C/T]AATGGCAGTTCCGTTATCTCTTGCCCCTAATCCCCACAGATCTGATAGATGC
RM20090701727_12CT	TTGTGTAATCA[C/T]ACTATGTCCTGCATATCCCAATTTGTATTTAGTCCTTGATTTGAGTAAAATGGTGCATAGGGATTACTG
RM20090701728_62CT	ATGTTGGCTCACACGGTGCCTAACAACGAAGGGGTGAGTATTGCTGCATTACCTGTGTACA[C/T]AATCACTGTATAGCCTACC
RM20090701729_3AC	GA[A/C]AGCGTGGCAGAGCTAGTCCCAGTCTGCTGGGTCTGTCAGGGAACTGAGGTCCTGTAGTAGCTCCTCATGTCTCCTAAT
RM20090701731_74CT	CCTCCTCCTCAACTGTTCTCCTATCTTGTCTTCAAAGCCACAATGCTTCACAGGAAAGGTTGCATTCAAGGAA[C/T]CCCCTTC
RM20090701732_44CT	GTTGGACCACACCTGGAACACCTGTCCCAAAAGGAGAACCAGG[C/T]GAGGACGAGGAGCGCTCCTTCCTGTCACCTTCCCAGG
RM20090701733_40AC	ACAGTATACAGTGCTTCCAATGAGAGACCATCGACACGC[A/C]GATCAGATCGTGACGGTGGGAGTAGATGTGGTCTTAGACTT
RM20090701734_59AC	GACAGCGTGGTGGAGCTGGTCCAAGTCTGCTGGGTTTGTCATGACCAGTTCATACTAT[A/C]AGGTATCAAAGGGAGACCCAAA
RM20090701735_31AC	AAGGATGTTTTTTTGGGGGGTGGGGTGGGG[A/C]AGGATATGACTAATTCATAATCTAACATCTACCCCTAGTCTGGTAGCCAG
RM20090701737_8CT	TCCACAA[C/T]ACCTCATGGCCCTGGCCTTCAGACTGTACACGTATAATGTAGTTCGATATAAAACCGTATGATTCAACCCTGT
RM20090701738_77GT	GGCCTTAGGATGTAATTATCTCACCGGTCTCCATTGTTTAACATGCAGACAAGTGAGCTATATGTCCTTCAGTTTC[G/T]TGAC
RM20090701739_15AC	ACGTCCTACATCAT[A/C]ATTTATATTCCTTTGGAAGGTAGGATACTTACTGTGGGTAGGTTGGCTGTGATTTCGTTCTGGGGC
RM20090701740_16AT	CACAATAGCATTCAA[A/T]CATACAGTACCCATCTCTGATGTTGGCGTCTTAGTAAATCATAATGAATTTACCTAATTACACAA
RM20090701741_30AC	GGTGAGGTGCCGGAGGTCCCTCCGCTCCC[A/C]TCTGGACATCGAGGGGTCCCCAGCGTACACCGTACATTCTATTCTGGACTC
RM20090701742_46GT	GGCCTGTGTGCATAACTCTCTGTGGGTCCTTTTACTGAGTCAGAA[G/T]CATCACACTTCACTGGAGTATGTCAAAGTGCATCC
RM20090701743_39CT	TTCCACCCCGGCTGTATCTCTGCCCCCTGACCGTCATC[C/T]CCCTCCCATCCATCCCACTTCCTGGGTCTTTGAGAATATTAG
RM20090701745_31AG	GTGTCAGCGGTCCAAGGAGGAGGTACTCCT[A/G]CGTCGGGCTCCATTGTAGATCTAACCGCCGCGTCCAGCCCTGTGCTCAGA
RM20090701746_19GT	GGCTACCACATGAGGGAG[G/T]AAGATGTCTACCCTGTAACGCACAGCGTTGAGATTGCTTGCAATGACATAAAGCTCAGTCCG
RM20090701747_13CG	CTTGTCGTCAAG[C/G]GGTCGTAGTTTGGCCTGTATGTGGTATCTGGGGCGTGTTTGGGAGGCGGGGTCTGTGGCTCCACTGAA
RM20090701748_51CT	CACACACACCTCCTCTGAAAGTGCACACAAACACATTTCCACCACTCATA[C/T]TCTAGATTATTCACATCCCTCACTTTTCCC
RM20090701749_32AC	ATTCACTTGTCCAAGCAAGTCAAGCTAGGTA[A/C]ATAGGTAACACTTCATTTAATAGTCCAGCCCATTTGGTGTTCAATGTGA
RM20090701750_49GT	GGGTACCACATAAGGGAGGAGGATGTCTTCCCTAAAACGCACAGCGTT[G/T]CGATTGCCTGTAATGACAACAGACTCAGTCCC
RM20090701752_15GT	CAGTTTAATCGAAA[G/T]AGGATTGGACATGGACTAGCAGACTTGCGAGGCAACAATGTGTATAAATAAACATTGAAAACACAT
RM20090701753_77CG	CAGGGCTAGAGCTGCCTGCCTGACTCTCTCCTGCTCCACAGCATGCAACACAGGCAGCAGCTGCTGGTACTGCTCC[C/G]CTGA
RM20090701754_62CT	TCAAAAACAGACCAGCCAATGTCATAAGCCATTTTAATGGGAGAAAATGACCTATGAACCA[C/T]TTTCACAACAAATGGGAAC
RM20090701755_53CT	CTACAGGACTGGCACTATACCCTACAGGACCTACAGGACTGACACTATACCC[C/T]ACAGGACTGATACTGTAGCCCACCAGAC
RM20090701758_36AT	GCCTCCCACCCAGCCTCAGCACTGGAGACATGCAG[A/T]GCTGAAATAGCATAGAATGTGTTCCTTCTCTGTGCCCCTGAGGAA
RM20090701760_80CT	GAACAAATGCCATTTTCATTTGTTTATTGTTCCCATTCCCCTTTCCCTGAAGTTTAGGGAATTGTAAAACAATAGGGCA[C/T]A
RM20090701761_59GT	TTTCACAGCGCTTCTCAAAGGTGGGCAGCTTCCCAATGAAACCATCATCCTCTTTAAA[G/T]GGCCCAACAAAAGAAAAGAAAG
RM20090701762_57AG	CACTTGTGTTGTCCCATGCGCACAGTCTGGAGTGTGGTTTAAAGAGAGAACATTGC[A/G]CTCTACTAGAGTCCTGTCCAGGGG
RM20090701763_20CT	AGGCTTTTTCATTCAATTC[C/T]GTTTTCCTTGGCTCTGCTCTGCCCCACTCTCTATTAAAAAGAGTCCCTCAAATCTAGCAGA
RM20090701765_61CT	AAGCCTGCCCAGGTGCGTCAAATCAGCTGACCATCGTCCCAGCAACGCCCACTGGCCTCC[C/T]GCAACAAGCAGACTACCAAA
RM20090701767_79AG	AAACTGGTCAGGGTCGCTGAGTTTGGCGGAGTCCTGGTCGAAGCGTTGATACTGTTTGACCTCCTGGTCATCGGGGGC[A/G]TA
RM20090701770_26AT	TGTCATGCTGTATCTAATGCACCTG[A/T]CCCAGGTTTAAGATACTCCTGAATAATGGTGACAGTTCCACACCACCAGCTGAGC
RM20090701771_59GT	CCTGAATTTCAAATTGGCTCTGGCGCACAAAGGCAGAGCCCCCAAAAAGGTGCTTAAT[G/T]AGACACAAAGGGCGTTACACTA
RM20090701772_36AG	GTTGGCAGGAGGCTAACAGAGGAGACTGGGTGGCC[A/G]TCTTGGATTCCCAGACCCAGACAGGTGCAGCCAAGGCTCTAGGGA
RM20090701774_12CT	ATATGACACTT[C/T]GATTCAACACTTCAAATCAAAGCCAAATGCTCAGCTGACCTTAATATCCTGATACATGCAATGGCCTGG
RM20090701775_15CT	CATCCCGACATGAC[C/T]CTCCAGCATTCTGTGTGTGATTTCCTGCAAGACAGGAATGTCAGTGTTCTGCCATGGCCATCGATG
RM20090701776_30CT	ACTCTCTTGCTTCCCTGTAGCTAACCAGC[C/T]ACCGCCAGCCTTCTAATTAGATACCCTTTGCCTGGTTAAGAAACACAAGCT
RM20090701777_41CG	GGATTAGTTCCACACACTCTAAAATAAGATGAAATGTTTT[C/G]TAACTCTGAAAATATAAGGAACGTATTAGGACCTACTAAT
RM20090701779_48AG	GCCTGCTGTTCTGAAGGCTAAACACAGAAAGCAGTGATGCAGCTAAC[A/G]CTAACACAGGACTGTCATCTAGTCTGAAGAAGA
RM20090701780_16AT	GAGGTTTGATTTTTT[A/T]GATTTTTTATTTGTCAATAACCTGGTCAAGTTAATTTATTATGTCTGCGTTTGTATGCAAACATA
RM20090701781_43CT	AAAATGCATGAAAGTCGAAGATGCATGAAAGTCGAAGATGCA[C/T]GAAAGTCGAAAATGCATGAGAATCTCAGTGGGATCTTC
RM20090701782_2AG	G[A/G]TTTGGGAACTACAGCTCAGCCAGCAGCCCGGAGTACTTGCAATGGGATGGGTTAATGTAGATAGGCAAAGACACATACA
RM20090701783_57AG	TATTTTCTAATTTCTATCTCAAGTTTAGTTCTTAGGATAATACAACTCACACATTT[A/G]CATCTTTCAATACTTCTAAAATGG
RM20090701784_58CT	CCACAGACTCTAGGCTCATTGAAAACAAGCCTAAAGACCTTTCTCTTTTGAAAGGCT[C/T]TCCGTTTATAACTGTGCTCCTTG
RM20090701785_59AT	GCAGCGCAGCTGGGGAGTGACTCACAGATGCTGTCAGCTCCAGAGTCTGAGCCGTCTC[A/T]CCCAGCAGAACCCTGAGGCTGT
RM20090701786_66AG	ATGACACTGCAGAAGGAACCCCTCCACCCCACCTGGCCCTCCGGCTAGAGGATTGCTATAGAACA[A/G]ATTCTGCTCAGGGGG
RM20090701787_25GT	GGGTGCCACATGAGGGAGGAGAAT[G/T]TCTTCCCTGTAATGCGATTGAGATTGCCTGCAATGACAACAAGCTCAGTCCGATGA
RM20090701788_47CT	CAGAGAGGGTAAGCTACATCTCTACTAACTCAGGTTGGCAGGTGAG[C/T]CGAAGCACTCCCTCTTTCTCTGTCTCTCTCATAT
RM20090701789_6GT	GTTAG[G/T]ACAGTGTTAGAGGGCAGGAAATGGCTGTAAATGTCTGGCAGACTTGAAAGCCTGTCTGAGTGTGTGTGTATGTGT
RM20090701790_65AG	CTTCGGGGCGGGGTGGACTGGCCGTCGGGAAGTGCGGGACTATTCCCGGTAGGCCTGTCTGATC[A/G]GACGTGTGTGGGCCCC
RM20090701791_18AG	CATCGTATAACCAGCCA[A/G]CTGTATGTTTTTTAAATGTTTTTAATTGTGAATTTTTACGGGCTCGGGAGATACACAACCCAA
RM20090701792_37AG	TATGCAGTGAACTGCCACGTGATAACCTGGGAGCGG[A/G]TCCTGAGCCACTTTGACATCTTTGTGTTTGGGAATTTTGCGGGC
RM20090701794_17AG	CCACGGGCTACCACCA[A/G]CAGGGCGCTGTGGACCCCCGGACCAGCACTACTGGGGGATCTTCTTATTACTATGACGACTATA
RM20090701795_65AG	ACAGAGAAGAGGGCTGGTTAGAGTCAAGGAGGAGAAACAGAAACAGAGAAAGTTGAATTTGAAC[A/G]GATGTACTGTTTTTTC
RM20090701796_79AC	GTGCTGAGACCCGGGTTGGTGCTCCAGTCATTTTATTTGATCTTGTGCTAGCGTTGGTTTTGTGCTCTGCTGGATTAG[A/C]TT
RM20090701797_64AC	GAACAGGGTGATCAAATTAAGATCCTATATCCTACAAAGATATAAACGCATGCAACAATTTCA[A/C]GGTACAGTTCATTTAAG
RM20090701798_70CT	ATCATCACATGGTCTCAGTCTTTCTCCTCAACACCAGTAGAATCAGTAGAACTAGAAACACCCAGTGAC[C/T]GTCTTAGTACA
RM20090701799_9AG	CGTCTGAG[A/G]GGATGTGTGGGGAGATGCTGAGGAGTATTTCTGTCTGTAATAAAGCCCTTGTGTGGGGAACAACTCATTCTC
RM20090701800_64CT	TGAAATATGGTTTCTCTCTTTGTTTACAGAGGTGCACCCTCAGATAATAGCATTGTTTGCTTT[C/T]GCCGAAAAGCCTTTTTG
RM20090701801_10AC	TAGGACACT[A/C]ACTAGGGCTGTCTGGAGGAAACCCCTCTGTCGCATGGCCTGAGTCCCCCCCGACCGGGCCAGGTGGATGAG
RM20090701802_23AT	TTTGGCTCTCAGCCCTGACCGA[A/T]ACTAAGAGGAGCTTATTTCAGTGTGTATAGAATGGTGTACTGTGTGTGTGCAGGGCTA
RM20090701803_79CT	CACCTCTGTAGGGGGCAACGACTCACGCAGCGCACACCTCCGAGTCAGGTAACACCATCGACATATCTCGATCTCCCT[C/T]TT
RM20090701804_18CG	AAACTGGGATTGGAAAA[C/G]GAAGAAAGTTGTATTGGATTTCATCTGGACAACCCAGGATGCATCCCAAATGTCACCCTATTC
RM20090701805_52AG	ACCATGACTGTTTAAATTAAATGTATGTCAATTATGCCTTTGAAGTCAAAT[A/G]TTCTCAATGACATTTGACACCTGGGTTTT
RM20090701806_13CG	GTCAGGCTACAG[C/G]AGAAGGAAGGGAGGGGTAAAGTTACAATTTTGACATTTCAAAATTATACACATTTCAATATTTAAAAT
RM20090701807_39CT	CATCCTGACAGGACCCTCCAGCGTGACAATGCCACCAG[C/T]CATACTGCTCGCTCTGTGCAAGACAGGAATGTCTGTTCTGCC
RM20090701810_30AG	CCCACCACAAGGAGTCGCTAGAGCGCAAT[A/G]AGCCAAGTAATGGCACCCGAACCCGCAACACTGTGACGCAGTGCCTTAGAC
RM20090701811_8AT	GCGCAGG[A/T]GGATGGAGACCCAACATGAGAAACCTTGATGCAAGGGTAAGAAAATATTTACTTTTATGTCAGACCATATTGG
RM20090701812_44AG	TAGGGACAGGGCTGGGGAAGGGGGAGGAAACCAAGGAGACCTT[A/G]TTTGGCAGGTGATTGCTTAGGGGGAAAAAAAGCAGTG
RM20090701813_8GT	GAGGAGG[G/T]TTGTTTGTGATTGGAGTCACCTGGGATTCTGAGTTTGTTCGTGATTTGACTTCTGCATTTAATCATTGGTGTA
RM20090701814_50AG	ATGATCGTGTCTGGTGTGGATGGACAAAATCTTTGAGTGAGCAACAGAG[A/G]GAATGAGCAAGACAGAAATGGGAGAAACAAG
RM20090701815_35GT	TATGTTGATTTATTTCTGAAAAGGCCATAAAGAT[G/T]TTTCAATACTGAGTGAAACCTACTTCTTTCCAATCTCCTTCAGATA
RM20090701816_54CG	CATGTGTACTGAGGTCAAGAGGAGGCTATATTTATCACACCCCAAACACTGCC[C/G]CCCACCCTCCACCTACCTAAAGTGGTG
RM20090701817_71AC	CTTGACATTGGTATAATCACCTTATGTAAATCTTGCAAATGTTACGTAACCTACCTTCGTCATTACACTG[A/C]AGCAGTAGGG
RM20090701818_66CG	CAGAAACATGAAGCGGAGCAGGAGAAGATGACCATCAGAGATGAGCTCGTCCGATTGGAACAGGA[C/G]AGGCTAGAGTTGGAC
RM20090701819_40AC	CGGAGTAGATCAACACCGTCCTTCTTCAAATCCCCCCCA[A/C]CCAACCTGAACAAAATGACTGAGATGAACCCAGGAGTGATG
RM20090701820_3AC	AG[A/C]ATTTTATTGCACATCAGGTGTATATGACATATAAACAAAATTGAACATGAAATGTGGCCCTTTGAAAAGGGACATAAA
RM20090701822_42AC	TTCAGCGGACCCCTAAGGGGCCAGGGACCCCTGGTTGAATA[A/C]CCCTGGTGTAAGTGTTCTGTCTCAACCGATGTGGGGTTG
RM20090701824_27CT	GACTTGAGCAATTTCCACTAGATGGG[C/T]GGGCTGCAAAGTGAAAATTGGCTATATATTGTAAAAAATCATGATAATGTTTAG
RM20090701825_63AT	CACTTAGCATTTCACACGCAAGACGCCCACCCACCAGTCCTGCCCGTCCGCTGCCACCAGTC[A/T]GCCTGCCTGCCACCCCTC
RM20090701827_9AT	GTGATGTC[A/T]CAGCCCACCTGTGAGGGGCCATGGAGGACACCATGGCTGTTTGTTGAATGACAGGCTTGATTTTCCTGCTTT
RM20090701829_74AG	CATGTCCTTGTCCATTTCCTCCGGCTCAGGCCCCTGGCCCTGCCCCTGCCTGGAACATAGACACGGGTTTGGT[A/G]AGTTTGG
RM20090701831_25AC	CATATAGAACTACCCTGATAAGGG[A/C]CCAGTGTTTTTCTTGATCAAATGACTTAACTAGGAACTAGGGTCCAGAGTTTGTTT
RM20090701832_74AG	AGCTGGAGAGAGTACAGAACTCCCAGGCTATCTGGGTTCCCTTGTAGACATGACACCATGGCTTAGTATCATC[A/G]CTTGGAT
RM20090701833_4CT	ATC[C/T]CTCACCTCGGACTTGGTTAACTCATCCCTCTCTCCCACCTTTTCTCACAGGAAATAAAAGTAATTTGAATTAAATTA
RM20090701835_34GT	TGTAGGGAAGTGTCAGTCAGACCAACAGCCCCA[G/T]ACTGTCACACATACTGACAGCCCCCATTTAGAGTGTGATGGGAGTGA
RM20090701837_32CG	AAAACCCACATGATATAATGATTGTATGTGA[C/G]GCTAACGTGACAACATGTAAGATAACATATGATGACATGAAACTACACA
RM20090701838_15CT	GAGGAACACCATGA[C/T]GTCATGAACTTCTTGGAGGAAAATTATTTTGATGAGGAGCTACTTGGTGAAGACAAGGACGAAGAG
RM20090701841_4CT	CAT[C/T]CTGACATGACCCTCCAGTATGGCAATGCCACCAGCCATACTACTCGTTCTGTGTGTGATTTCTTGCAAGTCAGGAAT
RM20090701842_34AT	CAGGAGAGGATATAGAGGAAAAAACCAGCCTGC[A/T]CTAACATGATGTTCTGAATGAAGTAGTTGAACACCTGAAGGAGAACC
RM20090701843_43AC	ACACGCTGTGCTTCGGCCTGCTGGGGAGTCGCGGTCGCTACG[A/C]TCGGGCAGGCAGACAGATACTCTGCTCCGGTGAGCAGT
RM20090701844_72AG	GTTGTTGGTGTTGTGTGTACAGGTGCCTATAGGAAATATGGTGCCGGGGTCAAATAACTACATGCCGGTAG[A/G]TCTATACGC
RM20090701845_11AG	TGATCTCAGT[A/G]AGGCAAAGGAAAACAATTATAATGACTGATTAACACAGTTGTATTAACAACTGTTCGCAACAGACAGTGT
RM20090701846_47AG	GATGTGCGGCGGAGAAAGCTCTTCTCCTTCCAGAAGTTCTTCCTGC[A/G]GATCGATGAGTATGGCAGAGTCAACGGGACCAAG
RM20090701848_47CT	GGGTACCACATGAGGGAGGAGGATGTCTTCCCGGTAACGCACAGCG[C/T]TGAGATTGTCGGCAATGACAACAAGCCTCGGTGT
RM20090701849_2CT	A[C/T]GTCAATATTTTATTGTGTTTAATAAAATATGAATTTAAACTATCTAAAGATACTTCAAATATTAATAGTGGTGCAATAA
RM20090701851_18AC	AGGGTACCACATGAGGG[A/C]GGAGGAGTTTTGTCTGATGCTGTGACACACCGCCCCAGACCATGACGGACCCTCCACCTCCAA
RM20090701852_70AG	GAAGTCTGGCACCATGGGGTCGTACACCTCCCTCAGCTCAGCCACAATAGACTCCTCCGCCCCTGGACA[A/G]AAGAGAGGACG
RM20090701855_64AC	TCCTTACTAGTGTCCCATCACTCAGTTCATATTAACTCTCCTGTCCAACACCCTGTGCCCCAA[A/C]ACACACCCTACCCATTC
RM20090701856_70GT	TTGAACAAAGGAAACATTCATCATGGATTTAAATGATCTCGTATAACTGTCCCCACTTCTCCAATCCCC[G/T]TCTCCTCCTTT
RM20090701857_66CT	TGAAATATGCTTTTTTCACTTTGTTTACGGCGGTGCTATCCTTAGATAATAGCATTGTTTGCTTT[C/T]GCCGAAAAGCCTTTT
RM20090701858_47CT	GTTTCACAGGAAAATGGCCACAAAAACCATGTGGGATTTTTCCTGT[C/T]AAATTCCTGTATGCAGGATTGCTGTAGGATTTGC
RM20090701859_15AG	TTGACAGAGATCGG[A/G]CGATCAGACAGACGACTTTGGGATGACATTATTTTTGTTGTCCCACAGATTATTTGGAAATGGTCC
RM20090701860_12CT	GAGACAAAGAC[C/T]ATTAACGATCACACAGTCACACCCTTAGATTGATTCACCTCATTATAACTCATATCTGGAATGATGCCT
RM20090701862_40AC	ATGGGATAAGGAGATAAAGTATGTTACACCAATTAAACC[A/C]CTCACCCAACAAGGTGAACAAACAATCAAATAGCTACATTC
RM20090701863_21CT	TACTGGGGCCAGCTGTGAAT[C/T]TGTCACTCCACAATCGGCTTTAATTTCACACCTTCTCTCCATCAGGCGTTAATCCGACCA
RM20090701864_67GT	GTCTCCATGTACTGAGGCCCACTGCAGCACCAGCCTGATCACCTTCCGCTTGTTGTTCAGGGTATA[G/T]TCAAGACGCTCCTG
RM20090701865_36CT	ACTGAGAAAAAAAATTATCGACCAATCACATTGAT[C/T]GCCGGTGTTTCATGCGTGAAAGTTTGCTGCTCCTTTAAGACTTTT
RM20090701867_11AG	CGGAGTAAAA[A/G]GGAGAGGGAGAATGAATGATGGAGGGGAGGTGGCAAGATGGGTGAGTGATTTGGCAGAAGGAGGGTGTGG
RM20090701868_14AG	CTCCCTGGCCCCA[A/G]GACGAGCGATGCACCACCCCCAGCAGAGCCTCCAGTAGACCCCCTCTCTCCGGGGGAGGAGGTGAGC
RM20090701869_53CT	TAATGCATTATAATGCAGTTATAATGCATTACAAGTCTTGTCATGAGCATGA[C/T]CTATAATGAACACCGTATAATGTCAGAA
RM20090701870_36CT	TGCAACGTTGACTGGCCTGATGAACACAGGATGGC[C/T]GGGCAGTGATAGTTGTTCCTTTCCATCACTCGTTGTGTTGTTTTC
RM20090701871_18AC	TTGAAATAACAAAATAA[A/C]AAGCTGCAGTCGATGCTTGAAATAGTCTTTGTAAAGCTAGTATATAAATTGGGGATTATGTAT
RM20090701872_32AC	GGGAGGGGGAGACGTTATTTGACAGTGACTT[A/C]ATTTGGAAATATAATACTCTGGTGGGATTCCTCCTTTAAGTTATACAGA
RM20090701873_33AC	GTCCATCTTGAACTCTGCCGGGGAGGCCTCTA[A/C]CTTGGGCCGCAGGAACGCACCACTCCCAGCTGTCACGTCCGTGTACGT
RM20090701874_69GT	GACATCCTGCTTATTATCTAGTGACTTCCACCAAACTGCCAATTAGCTAACATCCCTCACATTGAAAC[G/T]GTCCCTGATAAC
RM20090701875_58CT	GCTAGGACAACATACCTACTATTTCTCCTCTCTCTCACTCTCTTCACCCAACCTGGG[C/T]CCTGCCTAACCCCCAAAACAACC
RM20090701876_35CT	ATTACAAAACATTTTACAAAGGCAGAATGTGCAG[C/T]ATCACAACCAAAAGCAGGCACTTTCTTCATGCTCATCACCCACTGT
RM20090701877_46AG	TGTACTGTATTGGAGAACACTGTCTAGAGCGTGTATCTGCACCAG[A/G]TTCTGCATTGGTGTCTGTGTTTGTGTTTGTCTATA
RM20090701878_8AG	CCCACAC[A/G]AGCCCATTTTTATTTTAGGCCACCATTATTAGCCAGATAGTGATCATTCGGAGCCAAAAAAAATCTAGTTTAA
RM20090701880_32CG	CAGTGATCCGTGCGCGCGTGTGATCTCTGCG[C/G]GCGTGTGATCTCTGCGTGGCTACTTGTATCTGTATAGGGGTCAAATCCC
RM20090701882_35AG	GATTCCAACCTGTGACATTGAGAAGTCTTTTAAC[A/G]GAGAACAAAGATTAAATTAATGGCGAAAGGTCCTCTATATCCAGAC
RM20090701884_39AG	TAGCAGTCGTCATTGAGGCAGCGTGAGTGTCTTTTTAC[A/G]ATGTACTCCATGTCTTGTATTACGTGTGAACTACATTGTAGT
RM20090701885_59CT	AGAGGTTTGTCAGAGTAATGTAGCATAGCGTAGTGGTATTAAACTGCAGGATATGCAG[C/T]TTTTATTAAATCAACATTAAAG
RM20090701887_51AG	AGACTGAGCACATACATTTCTTTAAAAAAAATGTGTTTTTATTTTCAAAC[A/G]GTTTAATCTCCACGGTTGACTATTAATTCA
RM20090701888_36AT	GATTCCCTCTATCTATTTCATAAAGACTTCCTTTA[A/T]AGGTTGACTTATTTGTGGAGGGAATTCATACTAGTCCTGGTTGAC
RM20090701889_69AG	ACGGAGGGTTATATGTGGGCTAACCTGGCCATGACGGTGGCTACGGCCCTGTTGTCCGTCTACTTCCT[A/G]GTATGGCAGCTG
RM20090701890_58AC	ACTACTGCCCTAGAGGCACCATCGATCCTCAACCTTGCCCCATTGGCACGTTCAGCA[A/C]CCTGACCAAACTAGTCTCCCAGG
RM20090701892_57AC	GCTGATGAGCTCTTCTTACAACTCATTGTCATGATCCTCATATTCTGAAAAGTCTT[A/C]ATCTTTCAAAGTGGAAGACGCTTC
RM20090701894_46GT	GTAGTAGTTGGGGTTCTGGGTCATGCGGCGGTACAGGAAGGTCCA[G/T]GTCAGGTAGTCCACTGCGTCCTGTTTGTTCTCCAC
RM20090701895_38CG	CCCTGACATTTCTGGGGGGAATAACCCTAGCCCTCAC[C/G]CTCTGATCCCAGGTCCTCTCTTCGCTGGCCATGGCAGAACACT
RM20090701896_10GT	AGACAGAAA[G/T]GCAAAGTGTCCTCACATACATATAATTGTAGGAGAAGGAGCAGGCTAATGAAGTGTTGATGTGCTCTGGCT
RM20090701897_45CT	CAGGAACGAGTCATAGGCAGGGGGTAGGACCACCATATTATCTC[C/T]TATGCTGATGACCAACAGACATGCAATATCTACAAA
RM20090701898_44AC	TTACGAGTATACTCTCAGACGCGCCGCAATTAAGTTTTTATTT[A/C]GAGAACCGGCTGTATAACTTGTTATCTCTGGGAAAAG
RM20090701899_50AC	GTTGGGACCTACGCCACGTCCCTCCTCCTGTTCAGAGGACACTCCTTCT[A/C]CCACAGCGCCCATTTTGTTTTTGACTTCGGA
RM20090701900_29CT	ATAAAGGGTGGCCACATCAGCCAACACT[C/T]GCTCGCTTCCCTGACTGGCAGGCTGGCTTCTACGACTTTTAGTTTTGTTGGT
RM20090701901_18AG	GGAACTCTGAACAGTGT[A/G]CTGTTGTGTGTCTGATGTCAGTGAAAGAGAGATGTTTGTTCTGCTGCATTATTTATAGGCCTT
RM20090701902_2CG	G[C/G]GTACCACATGAGGGAGGAGGATGTCTTCCCTGTAACGCCCAGCATTGAGATTGCCTGCACTGACAACAAGCAACAAGCG
RM20090701903_18CT	CGACACAAAACGCAGAA[C/T]ATAAATATAAATCATGCCTTACCTTTGACAAGCTTCTTTTGTTGGCACTCCAATATGTCCCAT
RM20090701904_10AG	CTGCAAAAC[A/G]GCTGTAAAAAAATCAGGTGACCACAAACAGCTCAAGAATTTCCCCACAAATATAAACTGGCATCATAATTT
RM20090701905_6AC	GAAAT[A/C]ATTTTTTCATTCCACCCACTAGCTGATTTTTTTTGCGGGTCAACTGTGGGGAACCGTGGGTATCCAACCTGATGC
RM20090701906_25GT	CTCTAAAACGCAAATCCATTTTTT[G/T]CAGCTCATACACAGAGCTTTAGGCTGATGAGTCACTACAGACACTGCCTAATTCCT
RM20090701907_45CT	TACAACGGTACAGAGGAGAAAAAACCTGTTGACATCAGCTACTC[C/T]GACTTCACTGTAAGACCAGCCTTTTAAACTATACTC
RM20090701908_39CT	GTGAGTCGTCATGCGTGTCCGCGTGTATACTGTATATA[C/T]ACTGTACTGTGTCTGCACGCAGGTGGGTGTGAGCGCCAAGGG
RM20090701909_32AG	CACCTTTAGTCTTAACCTTGTTGATACCTCC[A/G]TAGCCAAACCCTAGAAGAACATTTCAGCCCAAAGAGACCTACAACCCTC
RM20090701910_5AC	TCCC[A/C]TGCTTAGCACCAGGGATGTCTGTATGTGTGATCCAGGAGACATGTCACCTTGTCTGCCACCGGGGCCTAATTGTAG
RM20090701911_5AT	GCCC[A/T]GTCATCAGAAGGGGGGTCACTACCACTTTTTAGGAATGCATGATAGAGAGGGAGATTCAGCACTTAGTGCTAGTAA
RM20090701912_26AC	TATCATTATTAAATATGTATTCATT[A/C]ATTGAAATTATTCCTGTTTTGATGATAAGCCGGGAATGTTTAAGATGCTTATTAG
RM20090701913_16CT	CTCTCTCTCCCACTC[C/T]GCAGAAATGGAAGTAAAAAATCAAGTTGTTACAACAGAGAGAGATGTTGTAGTACAGTGACATCC
RM20090701914_34CG	GGGCTTCAGTGGCAACAATTGTGAGATCGAAAC[C/G]AACGAGTGTGACAGCAACCCCTGCAAGAACGGAGGCAGCTGCAATGT
RM20090701917_29AC	CCCGGCCCGCCACAAGGACTCGCTGGGG[A/C]GCGATGAGCCAAATGTAAAGTGGCATTGTTTAAAGTTACTAGTGATATATTT
RM20090701918_24CG	ACCATGCCTAACGCTAATGCCAT[C/G]TTAAATTCTCACAGATGAAATAGATGAGGGCTCCACACTGGAGCTAACAGACCTTTT
RM20090701919_72AT	TCCTACCACAACAGGTGTGTCTCTTTCTGCTTCTGTCCCTACCTGCCTCTCTATCTGTTTATTTGTAGTCT[A/T]ACTAATCTC
RM20090701920_49AG	AACCCTGACTTTTCTGTCCCCTCCTCTCCGTCTCTCCAAGCCGTGCCA[A/G]GGCTCTGTACGTGTAAACAGACATGACCATTC
RM20090701921_14CT	AATAAAAGGGAGG[C/T]ATCTTTTCAATTAGCCTCTTCACAGGTAGTTGATGTTGACTGCCGCCAGAGTGGTGACCTGACATCA
RM20090701923_18CT	GCAAAGTTCTTTGTTTG[C/T]CAGACGAATCATTGGGTCGAAACTACAGAACAGTACAAAACAAGAAAACACACATAGTTAATA
RM20090701924_71CT	GCCAGTTGTGAAACCCTGTGATAGAGATTGCTAATTAGTCCCACTTTGTCTATTGAATAAAAATACCACA[C/T]ACTGTAAGTG
RM20090701925_15AT	CTGATGATAATGAG[A/T]GGAAATATGGGCAGCATTACTGCCAGATGACACTGAGGAGGTGGGAAAGAAGGGGGGCGTGTGTGA
RM20090701926_2CT	G[C/T]GCCGCGCCTCCCCTGTGCTCACCAGCACCTCCACTTCGTTCAGGAGCCAGGTCTGCTCTCACACACACGTCAGATTCAG
RM20090701927_65AC	GATTAAACAGAATGGATGTTTTGTGTGAATCTAAGGCTGCAGCTTGAGGTAGCAGATTAAACAA[A/C]GTCCTGCAGAGGACGG
RM20090701929_19AG	CAGTAGTTTGTAAACAAC[A/G]ACACTGCACACACATGGCTATGACAGGCCATGATGACAGGTGGCAATTAGGATAGACCACAG
RM20090701931_15CT	CCCCAAGATGCCTT[C/T]CTGCTTGGGGGCGAAGATTTAGGAAAGATACCATACACAATGGTGGGGGACGCTGCCTTCCCACTA
RM20090701934_47AT	TGAAATATGCTTTCTCTCTTTGTTTACGGAGGTACTATCCTCAGAT[A/T]ATAGCTTCGTTTGCTTTCGCCAAAAATCCTTTTT
RM20090701935_63AG	GAACCGCCCCTGCACTGCAGAGGAGCCGTGACATATCCTACAAAGGTCCATATAGCATGCAC[A/G]ATCGATTTTGTATTTCCA
RM20090701936_65GT	GATACTCAGTGCTTATTACTGTTAGATGAATGTGAGGATCTTTTCAAGGTGTTAAAATGTCAGG[G/T]CCTTAATCAGAAATAA
RM20090701937_35AG	TTCCTCAGCAATTACATTTTAGCACATAAGAAAG[A/G]GGATCATGAATGGAAGGGAATCGTCAAGATACAAGTTTTCAAATTG
RM20090701938_22AG	AGCTGTAAGAGTTCCTGTTCA[A/G]GAAGGGTTCAGGCCACACAACTTGAGAGCTTCTTCTTCTTCGTCTGCTTCATCATCTTC
RM20090701939_71AC	GGATCCTAAACCTCTCAGCAGGCTGGTGAGTGACAGACAGTAAGCTCCTTACTGCAGTACTGGAGGACTA[A/C]GTTACTGGGT
RM20090701940_36AT	TAAGAAGTTAATGCAACCGCTGTGTCAGATTTTTT[A/T]AAAACTTTACGGAAAAAGCATGCAATAATCTGAGTACGGCGCCAT
RM20090701941_22AG	TGAGTCTGCCTCCTGCTGTTT[A/G]GTCCTCAGCAGAGTGCTCTGCTCAGCGGCACGCCTCTTCAGCTCATCCACCAATGCCTT
RM20090701943_28AC	TGAGGAGAAGAGACTGAGTGTAAAAAA[A/C]TGTTATTGGATGCTGTCATCTGTGAAATATCAGAATGATTAGGCAAACGCAAA
RM20090701944_79AG	TGACACAGGCTGATAGACTGAGGGAGAGAAACTGCAGAAAGCTCTGACACACACACTCAGTACATCCTGTAATCACAT[A/G]CA
RM20090701945_2CT	A[C/T]GATCACCAATATGAACAGATAATGTAGACTCATGAGGCCAAATATACTTGTTACTGTGTAGCCTGGCCCAAAGCATTGT
RM20090701946_47AG	ACATCGTCACCATGAAGCTGGGGACATTGTTTGACTCTCCCTGCAC[A/G]GTGGCCCAGACACCCAGCTACAGTTACAATCCCC
RM20090701947_42AT	CAAACTGGGATGGGATTGGCAGACAGTGGGTTTGCTCTCAT[A/T]GCTGCTAATGCTATTGGGTTTGATGTTGCTGGGGGGGTG
RM20090701948_50CT	AAAGCAGCTGTGGTTTGTTTCTGGTGAAACTGCTCTGCTTGAAAATGTT[C/T]GCAAAAACTGAAGTCAATATTTTGTTCCCTC
RM20090701949_62AC	CCCAGGGGCCCCCTGGAGAGGACGGAGACAAGGTACAGTAACCTATAGTTACATAGACAGA[A/C]AAGGTACACTAACAGACAG
RM20090701950_59GT	ACTGCACTCTTTAGTTAATTAGTCCAGTACTGTGCTCTGTCACGTTGTACAGCTAACA[G/T]AAACCCAGAGTTTTTGTTTTGT
RM20090701951_11GT	AAATAAAAAA[G/T]AAACTAAATGTTAAATGTTAGAGCTTTGAAATGTTGTTTACTTTGTTGTCTATGTGATGTGTCATTGTGA
RM20090701952_42GT	GGCTCTGTCATAGCAGAGCAATAATCCAAACACTGGAAGAA[G/T]GTCAGATAGGTATTGTGTTAGATGTCAGGATGTTTATCT
RM20090701953_30AC	CTGTGCCTCCTTTTTCTCCCAGCACCATC[A/C]TTCCCATCACAGTTTCTGAGACAAGGGCACTCGTCATCTCCTTCTGTTTGT
RM20090701954_14AC	GGAGAGACAGATA[A/C]AAGAGGATGGAAAGTTGAGATGTGACACCCACTGATATGAATCCCACTGAAACCAAGATGGGTGAAA
RM20090701956_49AG	TGATGTTCGGATGTACCGAAGTGTACACCTGTGCAGGTGTTGTTACAC[A/G]TGGTCTGCCACTGCGAGGATGATCAGCTGTCC
RM20090701957_62CT	GTTAAGCTGTATAATGCTCTGATTGTGTTCCTGTATGGACCTGGAGCCTCATTCCTATCCT[C/T]TAGTGTCAGCTCTCCCCTC
RM20090701958_25CT	CCTGGCTCGCCACAAGGAGTCGCG[C/T]GATAAGCCATGTAAAGCCCCACCAGCCAAACACTCCTCTAACCTGGACGACACTGG
RM20090701959_7GT	TATCCT[G/T]ACATGACCGTCCGGCATTACATGCCACCAGCCATACTGCTCGTTCTGTGCATGATTTCCTGCAAGACAGGACTG
RM20090701960_78AG	CGGTGACATTCTCACAAACCTCCCTGGATGGCATGACACCGGGGAAGGCAGATGCTTTCCACTCCACACACATACAC[A/G]CGC
RM20090701961_39AC	CAATACATTATTCAAATGTTGCTATACAGAGTCAAGTT[A/C]CAAATTCAATATCTGTGACTAATGGAATGGGGGTTGCAGAAT
RM20090701963_49AG	CACGTTGTCTAAAAATTCCATTCCACTTCATCTGCTTTCCCAACATAT[A/G]CTTTCCCAACAACTACCGACAATAATTGCCCT
RM20090701964_40AG	TAATGCATCCCAATGCTGTTATTATGCATCGTAAGACTT[A/G]GCATAAGCATGTATGACCCCTTATGTCTCGTTATCAACTTG
RM20090701965_75CT	ATAATAGTGTTATCAACAGTCTATTTTGCATACATGCAGCAGACTGGGATTCCTCCCCCTTCTCCTCTCAAGGG[C/T]GTGTCA
RM20090701966_61CT	ATTGAATAAAAAGTCATTGCTAGTCAGGCTGATTTCTAATAGTTGTAATATTTCTTTGTC[C/T]GGTCTAGTGTTGTCTGGGTA
RM20090701968_44GT	AAAGAAATCATCATGTAGAGTTAGTTCCCCAGTAAAGTGGAGA[G/T]CTTAACCTTTGTGTACACATGTTCAGTAGTACCACAT
RM20090701969_16CT	GAATACAATACTTAA[C/T]ATGTAATTTCTATGTAGATCAATTTATCTCAATTTATATTTTTGTTATTTACCCCCTGCAGCGAC
RM20090701970_44AC	CAGGCCAGGGCTCACAGGATTGGCCAGAAGAAACAGGTAACCA[A/C]AACTAGACCCATAGTGATTAATTAGTATGGAGGGCAG
RM20090701972_31AT	AGGAAAATTCTTAGCAACAAAAGTGTTATC[A/T]AATTAAAATCTTACACCGGTATTGTATAAATATTTTCTGGAAATACATTT
RM20090701973_9CG	TGATGTAC[C/G]GATGTACCGATCCTGTGCAGGTGTTGTTACACATGGTCTGCCACTGCGAGGACGATCAGCTGTAGCGCTGTC
RM20090701974_35CG	CATCCTGACATGACCCTCCAGCATGACAATGCCA[C/G]CAGCCATACTGCTTGTTCTGTGCGTGGGTATACTCTATCCACATTT
RM20090701975_4AT	CTA[A/T]TTTGGTGTTATCTTTACTATTGTCTGGTCTTGTGGTTGAGTGAAAAGACCTAGATAAGGAAAGACCTAGATAAGCTG
RM20090701976_57CT	GAGGATGCAGGAAGTGAGCAGCAGTTTGGAGTCTTCAAGGACTTTGATTTCCTGGA[C/T]GTGGAGCTGGAAGATGCTGAGGTG
RM20090701977_68CT	ACCAACGGCAACCCACATCCCTACCCAGAAAAGAGAGGGACGTTCTGTAAGAGGAACCAAGGTCTTT[C/T]GGAGAAAGCCAGT
RM20090701978_64AG	GAGACAGAGAGGCCATTGTACTGTAATTGATAAAAGGGTCCAGCTTCTGACACCAACGGCAAT[A/G]AGACAGGACACCATTAT
RM20090701981_51CT	GCCGGGGTGAGGATTGTCCCGTTTGAGAGGTGTAACCTGCCTGAAGTCTA[C/T]GGCAACCATGTGACCTCCAACATGGTCTGT
RM20090701982_69AG	GGCACACAGCAGGGACTGGAGGTCGTTGAACTGAATTCTGTCCGACGTGCTCTGGATGTGAGACTGAG[A/G]AGAGAGAGAACG
RM20090701983_80AC	GTCCTATGAGAGACCTCCCTGTGCACATGTTATAGTTCATCTTGACTCACTCTCCCATTGGGCAAAAACTGACTGAATC[A/C]A
RM20090701984_25AG	CTTTCGCTGTAAATGCATCTGGCT[A/G]TTGAATGTGCTCTAACATTGTCACTGTGCCGGTAAGGCATACACTTGTAGAATACA
RM20090701987_80AG	GCATATGGAAACAGAACTTGCTGTCTGCTGGCAAGGCTTGCTAGATATAAGGTGTTACATAAAAGGCTTGTGGACATAA[A/G]G
RM20090701990_77AC	AACATAAGCCCCATCAGCAATAATTTGGAGAATGATTAGAATCGAATGGTAGTTTTGTCGAAATATCAGTATTGAT[A/C]CTTG
RM20090701991_78AG	ACTACCCGAACTCACTACCTCTACTCAGGTAACTACCCAAACTCACCTCTTCTCATACATCACAGCCACTTCTACAA[A/G]TGG
RM20090701992_70AG	CCATGCCTTCTGACGAAGGCACATCATACTAAAATCTAACACCTATACCTTTATAGATAAATCAAGTCC[A/G]CTGCCCCAGCT
RM20090701993_25AG	GGAGGCTCTGGAGGTCAGAGGGGA[A/G]GAGGGAGAGCAGGACTGGAGGTAGCCCAGAGCGGAGGAGGCTGCTGCCCCTCCCAT
RM20090701994_46AT	GATTCTATGGAGCTTGGTCTGGGTCTGGAGTGAGACGTGCTTCAT[A/T]AAGGATGAGTCAAGCCCCTTCCCCTTCCCTCTATT
RM20090701995_19AG	ATGTGCTCAAGGAAACAG[A/G]TATTCCACCTTGACTGCTCGTGTATTCGATCCAGAGACCTTTCTGTTACTAGCCCAAGGCTA
RM20090701997_33AG	TCCACTGGGTGGGCAGAGGCAGAATAGACTCT[A/G]GAGACCGCTTACTCAGATGAAATGGGCCCTCGAAAGCACTAAATCAAC
RM20090701998_22CT	ACGTGCAGATGTTTCATTTCT[C/T]TCTCATGACGGAAGTCAGCGCAAAGTCCTACTACTTATGTGTCCAGGTTAAACGTGGGA
RM20090701999_46AG	CTGGAGAGGATGCAGTGCCCATCCTCTTTGCCGTCACAGCGGAGG[A/G]AAGTGAAACGTGGTCCAAATAACATTGACGACTAG
RM20090702000_15AG	TTCAGTATAGTGTT[A/G]ACAATTGGTGTTCTGGTTACTACTATTGTTCAGTAGAATTCTGTAATTATATCATCACACTTTCAA
RM20090702001_81GT	CAGCTGGAGGAAGCCATGAAGGAGAAGCAGGAGATCCAGGACAAGGTAACTACACACTGCCATGGCTGCCTGCCATGGGA[G/T]
RM20090702002_73GT	GATGTGCTGCCCCACCTGACGCGGCTTTCAAACCTATTGCAAAAGGAGGATGTCAACTTCCAGGCCATAAAA[G/T]AGCAGGTA
RM20090702003_23AC	ACTTCAAAGCAGTGGTTTATCA[A/C]CAAATATTTTCTACTACTTGAGTACCGGCACGTCTTACAAAATACTTTCTCTGAAATA
RM20090702004_63AT	GGGGGGGAAAGGACAGAATAAGTGTAAAATGTGGCGCTCCTTTCTCTAGGATAATGGTTGTG[A/T]TATCACACTGACTAGATG
RM20090702006_38AC	AGAGCGCCAGGCAGACACAAGAACAAGGGAGGTAAGT[A/C]ACACAGACTCTGTGGGATTATGGAGTTCATCATGGACTCTTCG
RM20090702007_32CT	TCGGCTTCAATACAGTTTAGGCCTTTTTTTT[C/T]CTTCTTTTTTTACGACTCCTACAAAAGTGCAGACCCACACAAAATGAAG
RM20090702009_52GT	AATGCAGGATAGTAACGTCATGAGTTGGAATTATGGTTAATTGTTTAGCTA[G/T]CTAGCTTCATGTCTTAAGAAAAAACTCCA
RM20090702010_8CT	GTGAGAT[C/T]CTGCTGCGTACGTGTGTCCCGCGGCCCGCGCCCTACTCCAAGGCTCTCCCCCAGCGTCTCTTCTGTGTCCTGA
RM20090702011_21GT	CCTATTACTTCAGTTGATTG[G/T]CAGTTTCAGTATTTGGTCTCAAGAGGTGTGTAAAATTGCAATTATACTTCAGAATGATCA
RM20090702012_11AT	AAGTATTTTT[A/T]ATAGATCTGTGAACATAATTTTTATTGATAGATGATATGTGATTACTATGACGCTCACTATCATCGACGA
RM20090702013_43GT	AGAGAGAGATAGAGACACTATCTCTTCATACTCTGGGCTTCT[G/T]TGCCTCAATGTGCAGAGCTCTCCTCTCTTTTCCTATCC
RM20090702015_75AC	GTGCGTCGCCTGGAGGTGGGGGAGCTCTACTTTGATGTGAGCCTGCTGCTGTGGTGTGGCGCGCTGGTTTACTT[A/C]ACAGCT
RM20090702016_35CT	TGTGAGTGTGTGTGCATGTATGTGTGTGACACAC[C/T]GATGTTGGCATCTGTTAGTGGTGGACTGCAGTCATAGGCAGGCTGT
RM20090702017_1CT	[C/T]GGGCGGGGTCTCTGTCATCAAGGCTTAATCCTGCAGCCGTTAGCTTCAGCAAACGCTCCGTGATGTTCACACACTTAGTC
RM20090702018_12AC	AAGAAAAAAAC[A/C]GAATTTAAGTCCCGGGGGTATGGCTGTTTATTCCAGAATGAGAAGGAATTGGGTGAGGGGGGTTTAGAG
RM20090702019_10AG	GCAAGGTGT[A/G]AAGTTGTCGTCTCCGGCCGGGTTGTCCAGGTCGCCGTGGAGCAATGCTATAACCCAGAAGGCCAGGCCAAA
RM20090702020_24AT	TGAAATAAGCTTCTCTCTCTTTG[A/T]TACTATGGTGCTATCCTCAGATAATAGCATCGTTTGCTTTCGCCGAAAAGCCTTTTT
RM20090702021_62AC	CAACGAGTAAAGCCCAGGACCTGGTGTAAATAATGCAGTGGTGCACATAGACATCTGCGTG[A/C]GCTCTTTCACAGTTCACTC
RM20090702022_46AG	GGGTACCACATGAGGGAGGAGTGCGCCTTCCCTGTAATGCACAGC[A/G]TTGAGATTGCCTTCAATGACAACAAGCTCAGTTTG
RM20090702023_28CT	AACCCCTGACCTGGGAGACAGGCCGTC[C/T]ACACCAGGCCTCCCGGTAGGGCCTCTGGTTTAAGAGGTTTTATTAATGAACTC
RM20090702024_41AG	AGAACAGTTAAAGTAGCCGACCCTGGTCTTTGGTGTGGGC[A/G]TATTTATGGGTGTGGGTTTATTCATGTCAATATCTCATAG
RM20090702025_21CT	TCCAGGTCAACCCTACAGCT[C/T]TCAAGCTCACCCTTACTGCTCTCCAGCTCAAACCTAAAGCTATCCAGCTCACCCTTACTG
RM20090702026_60AC	TCAGGAGTTACACTGCTTTCTGATGGTCTGGTGGATCCAAACTGTAAACTACAGAAACT[A/C]GGGTAAGTGTGTGTGTGTGCA
RM20090702029_16CT	TTGAATAAGATATTA[C/T]ATAGGGTTGAGATCGGGAGAAGACAGAGTTCTATTTCTCACAAATTGGGCAATAAAGTCTATTCT
RM20090702030_28GT	ATTCAAGAGTACAATGTCATAGAAATG[G/T]CATTTGGGGAATGTTTACCTAAGACAATAACAGGCTTGTTGTCATGTGTCTGA
RM20090702031_3CG	TG[C/G]CTGTAAAGCTATCATCTGGTTCTGATGTCTCTTTGGGAAGTCTTGGCCAGTGGTAATAAACAAGATATCTGAGCAGCG
RM20090702033_15CT	GAGTGTGAGAGCAA[C/T]GTGCTGCAGGACGGATCCTTGGTAGACCTGTGTGGAGCCACCCTGCTGTGGCGCACAGCTGACGGC
RM20090702034_43CT	CTGCTCAGAGGGGCTGTGGAGCTGTTGAGATCTGGGCCTAAT[C/T]GTGACAGAGACAACTATCAGTGACTATCGGATCACAGC
RM20090702035_63AT	CTGCTGGGTAGATGAGGGGTGCTGCTTGGTGGCGTCCAGCTCCTGTCTGGTCCTCTCCAAGG[A/T]GTTCATCATCTCCTCCAA
RM20090702036_35CT	TCCTCCAAGCCTAAATTAATTGTGAGTCAATGAA[C/T]GCCGTTACCGCCAGTGCTCTAACTCACTTTGCGATGGCAAGCAGTG
RM20090702037_46GT	AAAATAATCAACTGTCATCAACATTTGGAGTATAGTTGGGGAACG[G/T]GTTTAGTGAACGCGGTTGTTCTAAAGCTTTACCTC
RM20090702038_16AG	TTCCTGGTGCTTGTA[A/G]GTGCCATTCATGATCCGAGCAGAGGGGTTCTCTGCCACCCCGTTAGTGTAGTGCTCAGCCTCGAT
RM20090702039_44CT	CAGTTATGTGGATGCTGTACATTCAGGATGTGTAATCCCAGAG[C/T]ACGCTGCTAGTGCTAACACAACCATCCCAGTGAGCAC
RM20090702040_69AC	CCACCTAGAAGCCACCTGGGGAAATGCTAGAGGTGAAAGAGCACAAGGAGTCCAGCAGTGTCCAGCTA[A/C]AGCAGTACGGCA
RM20090702041_40AG	CTCCACACGGGAACGGAGAGAACGGGAAGAGGAGGAATG[A/G]AGGAGACGCATCTCCTGCTTGAGACTGTCGCCCTCACCTCC
RM20090702044_22GT	AATGTGGAGTGTTTTTTAAAA[G/T]ATTTACGGACAGATGAATTAATTAAGCCCTCATTACCTTTCATCTGCTTTTGAATTATG
RM20090702046_79AC	GAGGAGGGCCGTTAGTGATTGGAGTCATTGGAGTCACCAAGGATCAGAGTATTTAAACTGTCACTAATCACTTCAAAT[A/C]AA
RM20090702047_47AG	TGGTCCTGTACTGTCTGGAGGGCTGGCTGGGCTGGCTGTAGCCCAC[A/G]TGGTTCACGGCCAGAACCCTGAAGGAGTAGTAGG
RM20090702048_33GT	GGCTTCTGTATTAAGGTTGGCTTATACACCGT[G/T]GCAGTTTTAGACTTGGAGCCTCCGCAGCCTGCATAAGCCTCTGACATC
RM20090702049_31CG	GAAACCAGATGGGGTGGCTACTTCCAACCT[C/G]CTGATCACAAAACTTGACCGAATCAAGTTGTCCCTGAAGTACTGTAAACC
RM20090702051_54CT	GCGGCAATGAACAGGTTAAAAGGTTCAAACAAATTGGAGAGCAGAGCCTATTC[C/T]GAAATTGAGAGCATACATGTATGTACT
RM20090702052_71GT	TGAAGAGACGACTGATTATTTGATGCCCTTAAATGGCTCAATGACAGTTCCCATGTTTTAGGATTCCCAT[G/T]TATTTACACA
RM20090702053_18CT	ACCCATGGCCAGAGAAC[C/T]GGACCCAGCCCCTCTTTGTGTCACTCAGCCAGCCCCTCATTAATCTCCACCCTGGTGCCCTGA
RM20090702054_67CT	AATGAACTGGAGAAAATCACCAGAAGATTCACCATTGAGCTGGCCAAAAAGGGTTTTATTGGTGAG[C/T]CGTGTCTGTGATCA
RM20090702055_15AG	TACAGGGCCTGTTC[A/G]CCCTGAACAGCACAAGATCAGAGGGACAGGAGCCACTCTATCCTCTAGCACCACCAGAGTCCCTCA
RM20090702056_31AC	ATGATCAACATTCTTCGCTCGGAGGACCGA[A/C]TCAAACTGGTAAGAGACAACACACACACTTCCCCACAACCCTGGCCAGTG
RM20090702057_65CT	TCTAAAGACACTATGGCTGTGTTTAGACTGTCAAAAGACCAAATAGTGGAAAAAATATAAAAGG[C/T]TGTGTTTACACAAGCA
RM20090702058_30CT	ATGCATTTTTCTTTTGTAAATGTTTAACC[C/T]CCGTCCAGTTGGTGGCGACACTACACCTTTTGAGTGTAGTTCGCCATTAAA
RM20090702059_78GT	CTAATGAGCAGAAGGAAATGGCCCCTGACCTTGGCCCGAATCCACAAAGCATCTCAGAAAAGGTTCTAGGAATCTTG[G/T]TCA
RM20090702060_3CT	TC[C/T]TGTTCTGGATTCATTAGTTGGTGATTGCTGTGCTGTGTGCTGCAGTGGCAGTAACTCATCCTCATCTGGCTCCGTGAC
RM20090702061_52CT	TTTGTGAACAGTAGTGGAAAGCACAGTGACCTAGCCCAGCCCTTTGGCTAC[C/T]TGAAGGCCAGCACCACTCTCTCCTGTGTC
RM20090702063_29CT	TAAAGTAGTTACAATGCATTGTGGGACA[C/T]GCCATGCGTGTCTAATGCTCAACCTACACTCTAGCAATGCTCTCAACTAGCT
RM20090702064_65AC	GAGGAGGGTCGTTAGTGATTGAAGTCACCTGGGCTCAAAGTATTTAAACTGTCACTAATCACCT[A/C]TCTTTCTCTCTCCGCT
RM20090702065_38CG	GAGAAATATGAATGTAAAAAAATGCTTACATTTAATG[C/G]TCTTCTTGCCCTAGGATTGAGCTTCCCCACATGGCTGACATTA
RM20090702066_75AT	GAGGATGTCTTCCCTGTAATGCACAGCGTTGAGATTGTCTGCAATGACAACAAGCTCAGTTCGATGATGCTGTG[A/T]CACACC
RM20090702067_22AG	TGTTTGAGGGACAACTGGACA[A/G]AACATATAAGGACTAAGACTTTAGCTACCACCCACCCACCTTTACACTTCCTGTTAGGC
RM20090702068_57AG	AGAAATCCGCTGAAAGTTGCTGTAGCAGTAACTTTTTAATTGAAAAAAAGAGATGT[A/G]AGAAATATGTGACCGCATGATATG
RM20090702069_10AT	GGAAAAGGG[A/T]TGAGAGAAAACTGTATTCAAAGAGAAAACATGATGTTAGTTAGTGTCTCCTGAACCTAAAAAAGTGCTTAC
RM20090702070_46AG	CAATAGAAGCTTCATCTTCTTGATAAAGGCAGGAAGGAACCCAGG[A/G]AAACTAACAATCACTTGGTTGACTGTCTCCAATGC
RM20090702071_50AT	GACTCTAGTCAGCTTTGTCTAGGGTGGAGACTTTGTTTTAGTCGGGAAC[A/T]CTCAGGTATGCACATAGAAGTTCATCACACA
RM20090702073_44CT	CGACATAAATAAAATAAGAAATCGAAGAAATAAAAATATAATT[C/T]ATGCCTTACCTTTGACGAGCTTCTTTTGTTGGCACTC
RM20090702074_34CT	AGAAACTCAGAAACTAAATGAAACACTCTAATT[C/T]ATAAACTAAACACCATCAGAGGTACTGTTCACAGTAGAGTGAACCAA
RM20090702075_49AC	TGGAACTACAATACAATGCTAACCCATGGTAATGCAGGAAACACAGAT[A/C]ATCTGCATGGAGTTATGTTAGACCAGAGAAAG
RM20090702076_22CG	TTTTACATTATTGGCCTGGGG[C/G]AAGGTTCAGTTAGCCTCAATACAAGGTTCTTCTTCCCTAAAAGCCACATTCTGTCATTT
RM20090702077_3AG	GG[A/G]CACGTCTGTGATTTGGCAAGTGAGTCACGTATGCATGTGTTGCAGAACAGGTGACCACACTGGGAGGAGACAAGCGTT
RM20090702078_4AG	AGC[A/G]GCACAAGACACACCATTAGACAAACCTAGCAAGTTGCGGAGCCTGGAAGCGCATATTCAATGTAACTCAAATCTTAT
RM20090702079_77AT	TGGGTCAACTGTCCGCCAGGGAGAGACAGGGGGTGGTGAGGGAGAAGGTGAAAGGGAAGGGTCAGTTCCTCAAGGC[A/T]ATTT
RM20090702080_53CT	GCAAAGTTCTTTGTTTGTCAGACAAATCCTTGGGATCATTGACTCACTCACG[C/T]GTTGAAAAGGGCGAGGATCGAGATGGCG
RM20090702081_20AG	GAGGAGAAAAGACCCCAAC[A/G]AAGACATACAATGACATAGAACAGTCACAGAGCCAGCTGTCCCCCGTGGCATGGCCCCTTC
RM20090702082_13AG	AGGTGAGTGGGG[A/G]CCGTTTGTAAAGACACGAGACCAATCAAAGTCCAGGGGACCTACTCACTAGAAAATGGCCTGTGAGAG
RM20090702083_57AG	AGAACTGTTATATTTGTAGTCAATCTTATCTGTTCACCTTTCTCTATTTTCAATCA[A/G]CAGCCTTTCCTTTGTTTCAGAACA
RM20090702084_17CG	CCCGGCCAGCCACGAT[C/G]AGTCACTAGAGCGTGTGCCTTAGACCCCGGCGCCACACGGGAGGCCCAGCAGTTAACGTTTATC
RM20090702085_76CT	CAGGCGTACCGACACAGCCAACTGACATCAGCAATATGTATCACAGTAAAAGCAGTGACAGTAACATAGCAATGG[C/T]GTCAC
RM20090702086_6GT	GAATA[G/T]ATCAGATATGAAAAACCTCCCACACTGTCTGTCACCCATGGTAAAGTTGGTATGTTCAGCATCTAAAGTGAATAT
RM20090702087_20AT	CTCATTTTTATGACTCTTG[A/T]CTATTGCCCGGTGATATTGTCAAGTGCTGCAAATAAGGACGAGAACAGAGCAGCACTTTAT
RM20090702088_34AT	ACTGCACTGAATGTGATGATGTCACTGGATTCC[A/T]GCCATACCGTACCACTATGCATTCTAGGCTAAATCTTCTCTCCCATT
RM20090702090_66CT	CATCCTGACATGACCCTCCATCATGACAATGCCACCAACCATACTGCTTGCTCTGTGCGTGAATT[C/T]CTGCAAGACAGGCAT
RM20090702091_17GT	TAGTGAGCATCATACA[G/T]GGAAACAGAGAGCATATATGGGTTCTTGAGAGTCCTGGGTTTCAGGAATGGGGTCATATTAGCT
RM20090702093_2CT	C[C/T]CTGGCTCTCTGGAATGGCTCTGTTGGGGCCTCGCAGCTCTCACTGCTGATCTATCACCTCTCTGACACCGCACACACAA
RM20090702098_23AC	CCAGCTCACCCTGGATAACACA[A/C]ATAACCAGGTTGTCAGGGGAACCTCATATTGTGTCATACTATTTCTCAGAGTATCATG
RM20090702099_36AG	TTGTGAACAGGGCCCCAAAAGTTGCAGCGGGAGTA[A/G]TGGTGGTGGTGGAACCCTCCAGCCCGGACAACAAGGGTATACTGT
RM20090702101_77CG	TGAGTCGCATCACTTTATCACACACCGTCAGCTGGAATCAAAAGTGCTGTAATTATTTGAAAACCTTTTCTTATAG[C/G]TCAC
RM20090702102_21GT	ATGGCATGATGTTGCAAAAT[G/T]GAGTGATATGGCCTTCTTTCTTCAAGATCCCTTTTACCCTGTACAAATCTCCCACTTTAC
RM20090702103_36AC	CACAAACACATTGTTTGTGGTCTGTCATGGTCTGT[A/C]TTTTATAGACGCTGTTCGCAGTGTGCTGTGACATTTTACATTTGT
RM20090702104_29CG	AACAAACTACGATGAATACCATCACCAC[C/G]TCCTTCACCATATCTCCCCATGCAGAAAGAACCTGATTAAAAACAGTTAAAC
RM20090702105_55GT	AGGGGCGGGCACTACGTCTTGAGCCGACTGTTGCCTCTGCCATTGCCTTTCCTG[G/T]GAGAGCTGCAAGAGTTCCTGGCGACT
RM20090702106_1AG	[A/G]CGCTGTTCCCGACTCAGCTTGCTAGAGTCTGCATACAGCTCGGTTGTGACACATTTGATGCGGTCGCCGACGTAGCCTGA
RM20090702107_24AC	TTTTTTGGATAGCCACAATAATA[A/C]AATTATTGAAGGATGCAACAGAGGCATATTTCTATAGACAGATAGAAAGGACTCACG
RM20090702108_60AG	ATCTACATTATATACTATAGTAATCATTTGACCACGGCAACCTCAGAAAGTAAATAGAA[A/G]ATCACCAGTATTATTAGAGTG
RM20090702109_34AG	CAAGCCCAGCTCCCTCTCACAACGCACCGCCTC[A/G]CCACTCTCCACCCGGGACATGTCCTGACGGAGGGGCGAGAAGGCATG
RM20090702110_68AG	TTGAAGCTGCTCTGTGGAACTCTGCAGCATATCAATTAGCCATTAAGGGGTTGCTTAGGTATTAGAG[A/G]GATCAGAGGAGTT
RM20090702111_32AG	CTATACTGTAGGTTCCAGGCTTTACTCAGCT[A/G]GACCTCACCTGAAGAAAGCCCTGGATCAAGGTTGTCCCTAATGAATGTA
RM20090702112_1CT	[C/T]GCCTGGGCCCGCTGGTTCCCACTATCTGTTTTGAGTTCTTTGTGGTTGGAATACTGGATGAATACGGGGACGTTCCGAAC
RM20090702113_5CT	TTCC[C/T]GTCTAAAAGTACTTAGTTCCTTCCATTTACATGGATGACAGAGACACACAACAGCCCTAATAATATAACTAAAATC
RM20090702114_12CT	TTGATGGATCA[C/T]GGATGTCGAGTCAGGTAGCTCGAGACGCTAGCTAAGCAAACTAGCTAAAGTTAGCTAGTCAAGAGGCAT
RM20090702115_80GT	AAGTACTCCCATCGTCTGAGGATGCCACCAAATATCTTGGTATTCAAGATGTTTACAAACTACTGAACTGCAAGAACCT[G/T]T
RM20090702116_39AT	GTGGGGGGGCAGATGGTGTCTTCCTGGGGCATATATCA[A/T]TTTTTTTTAAATGCAGTGATGGCGGTGTCCCTCTGCTAAATG
RM20090702117_30AG	TATCCTGACATCACAATGCCACCAGCCAT[A/G]CTGCTCGTTCTGTGCATGATTTCCTACAAGACAGGAATGTTAGTGTTCTGC
RM20090702120_19AC	CTACCCTCTGCTCCTTGG[A/C]CTGCACTCCGATCCAAGATGGAGAAACACCTTCAGGTCATCTCAGTTCTGCAGTGGGTCATC
RM20090702121_49AT	GGGTACCACATGAGGGAGGATGTCTTCTCTGTAACGCACAGCTTTGAG[A/T]TTGCCTGCAATGACAACAAGCGCAGTCCAAAG
RM20090702122_62CT	AGGTACAGGATGATAACAACAACTGCCCGAGCACAATCCCTCCATCAGTGCTCAGACTGTC[C/T]GTAATAGGCTGAGAGAGGC
RM20090702123_62CT	AATACCCTGTACCAAAAAGATCACGCATAAGAAATATATTGCTGTGTTTTAAAAACACAGA[C/T]CTAAAATACTTCTTACTGT
RM20090702124_32CT	GGGTACCACATGTCTTCCCTGTAAAGCACAG[C/T]GTTGAGATTGCCTACAATGACAATAAGCTCAGTCCGATGATGCTGTGAC
RM20090702125_24CT	GCCCATATATGGGCATACAAACC[C/T]GACCCATAATGTAGGGTCATAAATCACACGTTGACATGTGCCGTCTACTGTATTCTC
RM20090702126_77GT	AGAGACAGAACACAGTCAGGCCTTTGGTTGGAAAAAAACTATTAGCCTTTAGTTCAACTAAATATGGATAACCTCA[G/T]GTCT
RM20090702127_11CT	AGGTACAGGA[C/T]GGCAACAACAACTGCCCGAGTTACCCCAGTGACACCACAATCCCTCCAACAGTGCTCAGACTGTCCGCAA
RM20090702128_70CT	TCTGTGTCTATGAATCTCTTTTAGCCTTGCGCTTTCTCATGGACACCCTGTTTTGACTGCAATAACACA[C/T]ATCTCTTATAA
RM20090702129_13AG	CTCTGGGCCCAC[A/G]CAGATGGCCTGCAGACAGAGAGACAGTAACCTCACTCACTACTGACCTCACTAGAACCAGGGAACCTC
RM20090702130_81CT	ATGGTTTTGAGGAGGTATGGTGAAAGAAAAATGGATAGAGAGCGGAGGTGAGCGACAGAGTTCCTTTAAGAGACCGATTT[C/T]
RM20090702131_34CT	CAGTTTTGTCAAGACCGGTGAAGACATGCCGCT[C/T]AGCCAAGGGACCTTTTTCTCTCAGACCTGTCAGTCATTTTCAAGCCC
RM20090702132_21AG	AAATGCACTTTTATTGGGAC[A/G]CAGGGTTGGTGTTTCTGTGTGTTGAGGAGAAGGTGGACCTTCTGTATGAGGGTGCCTACT
RM20090702133_32CT	CATCCTGACATGCCACCAGCCATACTGCTCG[C/T]TCTGTGCATGATTTCCTGAAAGACAGGAATGTCAGTGTTCTGCCAGGGC
RM20090702134_74CG	GGCCGTAAACTTCCACCTCACACAGAGTGAGAATCTTGTTCTGTCCAGGGATCACAACAACAACATAGCGACC[C/G]TCCATCT
RM20090702135_71CG	CCCCTCAGTCACTACTGGGTCTCTGTTACCATCGACTTCAAACAGCTACTCTCCAGAGACTGTGAGTGGA[C/G]TGTGTGTGTG
RM20090702138_27AG	GGGGCCCAGATCACCTTCATCACCCA[A/G]GATATCCAGGAGAAGCTGGAGTCCCATGTCCGTCGCAAGCAGAGCCAGCGCCTC
RM20090702140_8AG	CAGATGG[A/G]CCAGCTGTATGACATAGCAACCAGCCGCAGCTGTACAACCCCCCGGGCCAGTTTGGAGAAGCAATTACCCTTG
RM20090702141_41AG	CTACACAAAACGCTAATATAAAACATGCATTACCTTTGAC[A/G]AACTTCTTTTGTTGGCACTCCAATATGTCCCATAAACATC
RM20090702142_26GT	GTCCCGCCTGTCCGGAGGCTCTGGC[G/T]CCAGAGCCCCTCAGCCCAGAGGCGCCAGAGCTTCCGCCCCTCTATCCCGAGCTGC
RM20090702143_39CT	GGTGAGGTGCCGGAGGTCCCTCTGCCCCCTCTGGACAT[C/T]GAGGGGTCCCCGGCGTACACAGTACGTGCCCTTCTGGACTCA
RM20090702144_81AG	GTCTGTCAGCACCATAACAACAGTACAATTGTATTTGTTTAATTAAATATGAGTCTACTCTATTAACACCAACATAATTC[A/G]
RM20090702145_28GT	CTATGTGGAGACCAGTTGGTGGAGACA[G/T]GACTCTCCCCTTATTAATATACTGTGGTTTAAATCAATACCAGCGTTGTCTGT
RM20090702146_9GT	GCTCAGAA[G/T]TTTCAGATCTCACGGCATGGTAGCTTCTGCTCAGCAGAGTCCTGTAGTGGCCAAGAGGGAGCAGAGAAGGCC
RM20090702147_31CT	TCTGTAGCTGACTGGGGTGGGGATACGTGA[C/T]GGGCTGTTCTCTGGCCGGTTGTCTGTACGGGGCCTGACTCTCGGCCTCAG
RM20090702149_12CT	CTTGTAGGAAT[C/T]ATGCTTCTGGAAAACAATCATACCAGAATCCTGGAGATAGTCCTCAAATATATCCTGCATAATCTTTTC
RM20090702150_24AG	AGGGCATTTAATGGAAAGTGTCC[A/G]TTTTGGATAACAACAAAAAATTGCCTAAAATGTTCAACCTTGTACAGTATGCCAGCG
RM20090702151_56AC	ATTCTAAATGAACTTGAATCAAACAAAAAACACGGCTGCATGGCGAGTTTAAAGT[A/C]TCATCAAGCCACAGCTGGACGTTAC
RM20090702153_45CT	TTAACAGCCGAAGCATTGCAGGGAATGCTGAATTAAGATGTTCC[C/T]GCTTCCCAGGCCCCTGAGCCTTTGTAGAGATTTGAT
RM20090702154_33GT	AAGCCACACAACTTTCATAACTGTGCCCTTCC[G/T]CCCAACGTGTAGTAGGTAATGCTAACCCTTCTGACCCCGCCAGTAGAT
RM20090702156_77CT	AGATACAAAACGCAGAAATAAAATATAATTCATGCCTTACCTTTGACAAGCTTCTTTTGTTGGCACTTCAATATGT[C/T]CCAT
RM20090702157_46AC	TAATAATGTAGAACTTCCTGTATGAGCCTTTGTCTTATAATAATC[A/C]ATTTTCCTCCATGGCTCAGGTGGGATCATTCCAGT
RM20090702158_1AT	[A/T]CTCATCGCACAACACACCTGCACCGCTGATCTCTGCAGCGATACAACTCACTTCCTTCTTCAATGACACCATAAAGACTA
RM20090702160_77AT	ATCTCCTTTGCAGTGATTTAAGACATAGAAAGTGAGCTTTTACTGAAGGTTCAGCACCCCAACCCCTAGAAAAATC[A/T]GAAT
RM20090702162_32CT	GCACAGGAAGGCCTCGAAGGGGAAGTGGAGG[C/T]GCCGATCGGACAACGCCGGAATAAAGAAATGAAAGATCTGCTCCGTGAA
RM20090702163_60CT	AACCTGTCCCCTGTGATACAGATACGACCGCTATATGAAACTGTAGCAGAATACCAGCG[C/T]GATATCTCCAGTGACTTCTTG
RM20090702164_28CT	AGGGTCCAGGTGGGCATCTACCCTCGG[C/T]GGCGGCTCCGGTTCGGGGCGTAGTCCCCGCTCCCTACACTGATCCCTCCGCTT
RM20090702165_60AT	TATGCACACTGTGTAGATGTTTATATCAAGCAGTGTCAGGAGGTGAGTGTGCAGTGTTC[A/T]GTTGAACATGAACCTTTTCAT
RM20090702166_68CT	CCAGAAAGTATTTAATAAAATAGCATTCATATTTTAGTGGCTCATAGTATTGCATAACTATTGTACA[C/T]AGTTACACATAGA
RM20090702167_41AG	GGGGACCACATGAGGGAGGAGGAAGTCTTCCCTGTAACGC[A/G]CAGCTTTGAGATGGCCTGCAATGACAACAAGCTCATACCG
RM20090702168_50GT	CACTTCTCTTCCTGGGCCAGACAGCAGGGTGGATATGTACGTACAAACA[G/T]ATGTATATTGCTTATAGTACTGGAGTTCCAC
RM20090702169_38CT	TGCAGTCCCACATCCTGCAGCTCTACCAAGGTAAGCT[C/T]ATCTTAGTCATCCTCATTTTCATCATTATTATTCTCCTCCTCT
RM20090702170_18CT	ACACACGCTGTGTCAGC[C/T]AATCAGGCATCTCAGTGTGGCTCTGTCAGTCAGACACCTCTGTGCGGCCGTGTCAGCCAAATC
RM20090702171_61AC	CCCTGTAGAAGAAGACCCAAGACAACGGCAGCTCTGCTGCCAGGAGAGAGAAGAACCTTC[A/C]AATACAATTAGAATTAATAG
RM20090702172_40AG	TTCAGGTGTTGGCCATTATTAACCTGTCAATCACTCAAT[A/G]TCTGTCCACAACAGCCATCCACTTCTCCTCTCTGCCTCTGC
RM20090702173_78AT	ATCCTGCCTTCCGTTCTCACGGTAGGGGAAGGGTGTTTATTTTACCAGATAGTGCATCTGTTCCTTTGAAGCTGTTT[A/T]ATG
RM20090702174_58GT	TAGTCTGGCAATTGCCATTCAAAACAGCACTAAATTATACTGGTATCTTATTTGACT[G/T]GCAGCCACAGCAGGACGAGAGAC
RM20090702175_74CT	GAGGAGGGTCATTAGTGATTGGAGTCACCTGGGCTCTAAGTATTTAAACTGTCACTAATCACTTCTCTCTCTC[C/T]GCTCCTC
RM20090702176_18CT	CATCCTGACATGACTCA[C/T]CAGCATGACAATACCACCAGCCATACTGCTCGTTGGCCTTGCTCTACTCTGCCAACCCCTCTA
RM20090702178_78AT	TTGAAATATGCTACCCGCTTTATTGACATTGTGCTATCATCAGATTATAGCTTCTTAGTGCTTTCGCCGAAAAGCTT[A/T]AAA
RM20090702179_19AG	GAGGACCACAGAGTCCAT[A/G]GGCAGAGACGGGGAGCCTGAAGATGACTTGTTCTTCCCACTCAGAGAGTCCAGCGCTCTGGA
RM20090702180_75CT	CATCCTGACATGACCCTCCAGCATGACAAATACACCAGCCATACTGCTCTTTCTGTGCATGATTTCCTGCTTGA[C/T]AGGAAT
RM20090702181_24AG	TCAGTGTTGCTGGAGACGAGAAG[A/G]TGGGGGACTGACGTCTGAATGGGATTACCAGGCTGTTACTCTCCCGGCAGATGGAGC
RM20090702182_17AG	AAACACAAAACAAAAT[A/G]TAATTCATGCCTTTTTGACAAGCTTCTTTTGTTGGCACTCCAATATGTCCCATAACCATCACAA
RM20090702183_1AG	[A/G]TATCCCATATGGCAGTGGAAGCGGGCAGTGCCCCCTGGCAGCAGGTCCAGCACTGACACCTCCCCAAAATGAGGCCTCCT
RM20090702184_70CT	AGGAAAGAGTACACATTGATGAAACATAGTCTTGAGTATGAAATGCTTTCAAATCCAAATAATTCACTG[C/T]CCTTTAATTCA
RM20090702185_67AC	ATTAAAGTTATCTTTTATTTACATTTTCTTCAGATTGTGTGGTTAGCTCGCTAGCATTATTCAGGG[A/C]AATGGTCATGACAT
RM20090702186_5GT	TGTA[G/T]GACTGGAAATGTAACAGAGGGATTGGAGGGGAGGGAAGCATCTGATTGCAACAAGGTAATGACTGATTAAATAAGG
RM20090702188_40GT	CTGGATGCCTTTCTTAGGCTTCTGGTTGAACTGCTCTGT[G/T]CCGCTGTTCAGCAGCTGTAATCATACAAATAAATACTATCA
RM20090702189_68AC	GTAGACAGACAAGCTGACTGTGGAGTGTAGGCTACTACAAGTACTGTACGGTAGAGGTCGAATGTTT[A/C]TGATATTTCAACG
RM20090702191_40AG	ATTAGCACTTGGCAGCTAGTTTGGAAAGACTTTAGAAAG[A/G]CTGGCTTATTAACCTTTGACAAGTCATCGACCTTCTTATTG
RM20090702192_71CT	CGAGAATTATATATTTATTGTCTCTAATACACACAGGATCTCATCCACATCCTCCCTACACCACCTCTCC[C/T]CTGCTCACGG
RM20090702193_24AG	GAGAGGAGGGTGTCAGAGACCTA[A/G]AGCTGAGCCCCAGCCTAGTTTTTCCCCCTCACTTACTGCACTTTTATACAGTTCTGC
RM20090702194_15AG	CTCCCTAATGGACC[A/G]TTTTCTGCTGGACAAATGTAACAATGAATACCAACATTTACAACAAGTTTAGGGTGGCCCTAATTG
RM20090702195_38AT	CATACCGGTGGAACGACAACACCCGGACCAACATCTG[A/T]CCACAAGACCACCGCAGTCACAAGAAACGGTCAAAGCTAAAAC
RM20090702196_55CG	GTAATACTATATACTTTCACATCAAACAGTCCTCACATCACTTCCATGCTTAAT[C/G]GACCTCCCATTATAGGGATAAAGCTA
RM20090702197_59AT	TCCTCAGGGGTTTCCAAGACAACAATACAATGTCTTAGGGTGACCCTGACTCCTTGGG[A/T]CTGGTGCTACCCGTCAGGGAGT
RM20090702198_44CT	GCGACAAAACCATTTCCAATGTCAGTGATACATGTTATGTTAC[C/T]AATGACACACATAAACATAATTGGTTGTTACACACAC
RM20090702199_50CT	CAAAGGGCAAAGCTAACAAGTCAGCCAGCACCCAGGCTGCAACTGCAGA[C/T]AACAGCCCTGCTGACTACCAGTTCAGACTGC
RM20090702200_66AG	GGGTACAACATAAGGGAGAGCATTGAGATTTCCTCCAATGACAACAAGCTCAGTGCGATGTTGCT[A/G]TGACACACCGCCCCA
RM20090702201_15GT	GTTGTTGAAAACCA[G/T]GTGTGTTCAGTATTACCGGTTATTCAGGAACAACGGGGGGTAAAAAAACGAGACTTAAATAATGCT
RM20090702202_73CT	CTGGAGGAGCCTGTGGACTGTAGCACTCCTCCCCTGGCTCTGCCTCCACTGGATCAGCCCTGCTAGCACCTG[C/T]CCGTGCAA
RM20090702203_77AT	AGCCTCCTCTGCAGCCCTTAATGTGGTTGTAATGAACAAGGCAACAAAACCACTGGATTTGCAGTTTTAAGCTGGC[A/T]ATCA
RM20090702204_20GT	AACAGAAGACAGCATCAGT[G/T]TCAGCAGGACTCTGTCCAGTATCAGAAACAAAACAGGACGTTGAACGGCAGACTCCTACTT
RM20090702205_52AG	CAAAGTATTTGTAGCCACAAGAGACGCTTAAATACAGGAACCCCAGGCCTG[A/G]CGTTACGTGGACACGGATAGAAATCCGGC
RM20090702206_6AG	TGCTG[A/G]GACATGCTGGTGTCCCCCTCACCGCCCTCTAACTCCCCTGAGACCCCCCTCTCCCTCAGCCAGGTCACCTCAGCC
RM20090702207_45AC	TCGTATGTGATGCATGTGTTGGTTGTGTTGAAAAATGCAACATT[A/C]TGGCATTCACTTTCTTTTCTTGTATAACACATTGCT
RM20090702208_68GT	CATCCCTCCAGCATGACAATGCCACCAGCCATACTGCTCGTTCTGTGCATGATTTCCTGCAAGACAG[G/T]AATGTCAGTGTTC
RM20090702209_9AC	CAGGACTT[A/C]TCCAGTGAGCAGTGGGCCTGGACCAAGTTATTTCAAAACAACACCTTTCTGATCAACCTTTTTCACAGTGTG
RM20090702210_68AG	CTGTGATCCAGGACTAGGAGGGTTAGCCCCGGTCGCTTCGTTCAAACACTGATTCAGAGACAGGTCT[A/G]AAGTTTCACACTG
RM20090702211_79CT	CTTTCCAATTTGTGACACTCAGTCTATATGCAGTCTATATAACGGAAGAGAACAAGAGATGAAAGATAAATAATTATC[C/T]AC
RM20090702212_11CG	GTCCACATGA[C/G]GTTCCTTGATTGGTGAAGCGTGTAGAGTTGATCCATAGCTCGGGGAATAGGAAATGGCGGCGAGTAGTGC
RM20090702214_36AG	ATCTACAACTCGTTTGGGGGCACGTCTAAAGGACT[A/G]CACTTCAACAACCTCATCATTGGCCTGGTGCTGCTGACTAGAGGA
RM20090702216_5GT	GTCT[G/T]GCCAGTCATTAAGCGCTTCAGCGTCTCCGAGGTGCCTGGCCTCATCCACGGCTCCGTGGCAACCGTATCCACGGAG
RM20090702217_15CT	CAGCAGGGTCAAAC[C/T]GTCTCGCTCCTGATCAGCGACCAAGTTGCATGTCCTGTCCACTCACATCAGTGTTCACTAGCCCTA
RM20090702218_74AG	GGAGAGGTATTAGACAAGACAAACATCTCCACACAGATCAAACAACATTTTTTTTAAACAAACCTTTTCCGGT[A/G]TGTCTGT
RM20090702219_23AC	CTCTCTCTCTCCCACACAATTA[A/C]AGGGAAGTGAAAAATCCATTGGTTACAACCGAGAGAGATTATGTATTACTGTGACATC
RM20090702220_37CT	AAAAAGCAGGACTGAATATCAGTCAGTGGCTGATTA[C/T]GTTGCAATTTCTATGCAGTGTACTGTAAATAAACATCATATATA
RM20090702221_19AT	CTACTCCGACATCTCCCG[A/T]ATGCCGGCCATCAGTGACCAGGACATGAGTGCCTACCTGGCTGAACAGTCCCGGCTGCACCT
RM20090702222_57GT	CTTAGGCAAGACAGTCCAACAAATGCACTGACCCTACAGACCCTCTGAGGCTTCTG[G/T]ACCTTCCACAGACTTCCACACAAA
RM20090702223_9CT	TCACTCTT[C/T]TTTGAGATCAGTATCAAGTCTCTGCTCAAGTCGTGGAGCGGCAGCTGTGAGTACCCTCGTCACACTGCCCGT
RM20090702224_30GT	TGGCAGAGAACCTCCTGAAGCTCAGAGAA[G/T]AATTTTGGAGGGGGGCCAAGTCTCATTAAAACAACTGCCATTGCCAAGCTC
RM20090702225_60CG	AGAACCTCAAACATCACTGGAAAGACCCCCACCTTCACCTTGATGAACCCAGCACGTAA[C/G]AACCTTAAACACATAGACAGA
RM20090702226_61CG	GGGAGAGTACCGGGCGGATAAGGTCCCCTCTGACCTGCTCACAGTGACAGTAAAGTATGG[C/G]AAGAGAACCACCACAGCCGT
RM20090702228_1CT	[C/T]GGACCTCAAACTAGGTCCTAGTCAGAGCCCTTGCCCAAAGATGGAAGCTGCCTATTTGTGAAAGCGACAATTCCATTCCT
RM20090702229_41AG	TTTACAAGCATGCTGTCTGACCTGGACAGCCATTACTCGT[A/G]CCCTAAGGAGAGAGAAACTGGAGAAACCAAGTTCTCAAAC
RM20090702230_80GT	AGACAGATAGAGCTATGATAACAGAGTACAGCTCTATCCATCTGTCTGGCCCTAGCTTCATTGTTGTTGTCAATATTTT[G/T]G
RM20090702231_64AG	TTGATGAGGTGACAGTTGTTCTTCACGCTGTCCCTCTCCAACAGAGAGCTTTGTTGTTAGCCA[A/G]GGGGTTAGCCCGCTAGC
RM20090702232_81AG	GAGATGGACAAGGTAATGTAATACGTTGTGATTATGGGCTGGAGTTATTCATTTCTACATGTCACTGACAACCACTCAAA[A/G]
RM20090702233_24GT	CTGGACCATGTGTACACAACGTT[G/T]CTAGTGTTGCATTGCTAAAAGGCTAAAATAACATTGTGCAAATTAAGAATTTATGAG
RM20090702234_36CT	TCGCTGGTTTAGGTTTAAGTTATTTACAATGTAGC[C/T]GTCGGTCGCCATGGTGAAATGGTGCTGGAGGTTACAACTCGTTTA
RM20090702235_60AG	AAACGCAGGCTTCCTCACCAGCCCCACCCTGTGATGTTTATCAACATACTACACTTACA[A/G]CATGCTACTTACTCAACACCA
RM20090702236_59AG	CATCCTGGCATGACCCTCCAGCATGACAATGCCACCAGCCATACTGCTCTTTCTGTGC[A/G]TGAGTAACACCTCACAGCAAGA
RM20090702242_45AT	AGTGGCGCTATGGCTTGGGGCTGAGAACGTGCAACGCAGGGTGC[A/T]ATTCTGGTTAGCCATACTGGAAGAGAAAAGGCCTAT
RM20090702243_58CT	CAGAGCTATGAGATATAAAGCCCTGCAGACGTACAGCTATCAGATATAAAGCCCTGT[C/T]AGATTTAGAGCTATCAGATATAA
RM20090702244_23CT	CTGATTTTTTTTATCCCTGCTT[C/T]TTAAATCTGGCAGCGGATTTCGTAGCTGAACCACTTACATATCTGTTCAATCTAACCC
RM20090702245_28CT	AGTGAATCTCCTTTGGTTTTAGTCATG[C/T]TAATTCCTGAAACCATTGCGTGAAAGAAAACAATATCTTTAGCAAAGACATCT
RM20090702246_58GT	CATCTTGGCATGACCCTCCAGCATGACAATGCCATACTGCTCGTTCTGTGCATGATT[G/T]CCTGCAAGACCGGAATCTCACTG
RM20090702249_50AG	CATCCTGATATTACCTTCCAGTATGACACTGCCACCAGCCATACTGCTC[A/G]TTCTGTGCACGATTTCCTGCAAGACAAGAAT
RM20090702250_57CT	ATCAGACAGGAGAGAGACAGTCTGAAGGACATTGCCCTGCACCTGCCCCAGACCTG[C/T]CCTCAGGCCTCGGGGATAGAGGGA
RM20090702251_15AG	GACGTTACTAGGGG[A/G]GGATGGGGGGTGACGCTGTTAGGGAGAGAGGGGAGAGACCAACGGAAGTCCATTTAGTTATTTGCT
RM20090702252_69AG	ATACATTTAGAGGTGTGTATGTGTGTGGAGACACTGATTCAGATGGGCATGTCAAAGATGAAAAATAC[A/G]GATAATGGCTTT
RM20090702253_29CT	CGCTGCTGTGCTGTTTTAATTGCGACAG[C/T]ACCCTCATGAGTTAGCAGAGCACGGGGCGTGTCAACACCTCCACAGAGTGTT
RM20090702255_21CT	GAAACGTCTCCAAAAAGATA[C/T]ACTCTAGGGAGTTAATTATGCTGGGTTCGTCATTACAGTTAAACAATATATTGTGTAGCC
RM20090702256_49AC	GCTAAGCATCTGACACCCACAAGATCTGGCGCGGGTGTTTTAAAGAGG[A/C]GGAATCTTTTAAATTGATATGCATGTCAAAAT
RM20090702257_66AT	CTCAACCGCTCCTTCCTCTACGGAGGCAACGCAGCCTTCATCAGCATCGCGTGAGTGAAAGAGGG[A/T]TAGAGACAGATAGTG
RM20090702259_13CT	GGCAAAAGTCTG[C/T]AGAGAAGGTTACCATAGAAACAACAGGAGAGGCTGTCAGTCACAACACAAAGTACAAGCTACAACAGA
RM20090702260_78GT	TGGTCCTATATGCAGCAAATATAAAATATAAAAGCCTTGAGTTAAGTGCTATTTTGCTAGTGATGAGAGAGAGAAGG[G/T]TTT
RM20090702261_73AT	AAAATCGTACAACGAGTCTCCTGTGTTCTGTGGGAAGGAGGGGAACCGATACATCGGTTTAAGCAAAATAGT[A/T]TACATTAA
RM20090702262_5GT	ACCC[G/T]TCAACTGACACCGCTCCTGTGTCATGGTTTCCAGTTCCTCTCCTAGCTGCTGTAGCTGTACAAAAGTTAAACATTT
RM20090702264_44CT	AGAAACAAGAGGAAACATCACAGGTTGGCTAAAGCACCCAGGC[C/T]ATGGGACTGCTGGTCGACTAATACCTACTTTTTCACC
RM20090702266_44CT	CATGTAGGGTAGTAACGTCACAAATTGAGATTATGGTTCATTG[C/T]TTAATTAGCTAGCTACATGTCTTAAGTTAAAAACCTG
RM20090702267_68CT	AAGGGTGGTTCTACTGTGACCTGTAGGAGAAGGGTGGTTCTACTGTGACCTGTAGGAGAAGGGTGGT[C/T]CTACTGTGACCTG
RM20090702268_40CT	ATGCCAATGATGCCATGCTGTAATTGTTGTTGGCCATCA[C/T]TGATGATTCCTGTTCCAGCACTGGGGAGGTGAAACCACAAG
RM20090702269_53AC	GCCAAGCAGACTGCAGACTGTCTCCTTTCACATGCACACTACATCCCTCTAA[A/C]CTAAATACCACAGCTTGGGAAAACACCT
RM20090702270_49AG	CGACACAAAACGCAGAAATAAAAATAGAATTCACGCCTTACCTTTGAC[A/G]AGCTTCTTTTGTGGCACTCCAATATGTCCCAT
RM20090702271_66AG	ATGACTAGTGCTCGATTTGGAAACATTTTGCAGACATCTAAGGTTCTCTATTTCCCTGACCGGAA[A/G]TGGAGACAACTTCAC
RM20090702273_20AT	CATCCTGACATGGCCCTCC[A/T]GCATGACAATGCCACCAGCCAAACTGCTCACTCTGCGTGTAATTTCTTGCAAGACAGGAAT
RM20090702274_81AT	AAACAATATACCCTCATATTTATGTAACTAAACATTGTATTAACATGTGGTTACATGGGAAATGTCATTATTTTGTTTGG[A/T]
RM20090702276_27AG	CTACACAAAACGCAGAAATAAAATAT[A/G]AAACATGCCTTACCTTTGACGAGCTTCTTCACATATAAAAAATATTAAATTCCA
RM20090702277_70GT	CTGTGGGACTGGCTTTACCCTGTCTGAGGACGGCTCCCACTGCATGGGTAAGACTGCCTAACTAACCTC[G/T]GGAAAACACTT
RM20090702278_57AG	CCTCCTGACATGACCCTCCAGCATGATAATGCCACCAGCCATACTGCTCGTTCTGC[A/G]CGTGACTTCTTGCAAGACAGGAGT
RM20090702279_34AC	ACATTCAGATGGTTAAGAGGGGTGGAAATAGGT[A/C]ATGTTGAAGGCTTTCAGTAACTACAAAGCATTGAATATGCAAGAAAA
RM20090702280_57CT	TACAGAGTCATCTACTGGGCCAACCTGCCAGACGGAGGTAGGGGCTTGTTAACACG[C/T]GCTCAGAATACTTAGCGGACCACT
RM20090702281_51GT	ATGAGGAAGTGTACACAGTACCTGGAATGATTTTTAAACCACCCATACAT[G/T]AAATTATAGCTTTGTGAGTCAGAATTATGT
RM20090702283_38AT	TGAGATGTCGTCGTGCAGTTGAAGGTCAAGACTTGCC[A/T]ATCAGATCCTGCGATAAACCATGATGAAAAGAGAGAGCTGAGA
RM20090702285_45CT	CGTCTGGAGGAGCTGAAGGTCGAGGCAGAGGGTCTGAGGGCGAG[C/T]TTGGCCCAAAGGGACACCCACGTGGCCGAGCTGAAG
RM20090702289_64AG	ACAATGATAACATATTCTGGCTTTATGTAGGTTATTTAAACTTAGCCAGGGAAATAAAAAAAT[A/G]TATTCATCATTTTCATT
RM20090702290_77AC	CAAGACCCTGCAACCCCATTGGACAGTTAGTTAGCATTCTGATACGTCATTGGACAGTCAGTCAAGACCTATCCAA[A/C]ATTG
RM20090702293_43GT	CGGCTTCCCGACTGAAACGCCAAGCCCTTTGTTTATGTAGGG[G/T]TGACAGCCAACCACATTTAACATGTTTGTGAAGAATAC
RM20090702294_32CG	TAGTTTCCATGTGGACATTGCACAAACATGG[C/G]AAGCTTGAGTGTAGATACATTTATCAACAAAAAAATCCATGGGTGTGTT
RM20090702295_60AT	TCGACTGGACGGTCTTCCACCACCTGTATTTACTTTCTACAGCCAATACTGGGCATTGG[A/T]GATCATTGTGCCACAAATCAA
RM20090702296_68AC	TTGTTTGGTCAACTGCTGCACAGAAGAAATATCAGCACAGGGCAGAGAAGCACCAGATTGAACTTCA[A/C]TGAGCTTTCTAGA
RM20090702297_61CT	AAAACACATTTAGAACATTACAACAACATGCAACTAACAGTCATGTGTCTAAAATTCATA[C/T]ACATGATCACATTTTTATGT
RM20090702299_57AG	GGTCCACTGGAGTCACAATCATTGGCTTTACCCCTGTGCTGAATATTCCCCCAGCA[A/G]CCCAGTAGGTACTTAGAGACTGAC
RM20090702300_67CT	TTTCCAATGCCGTAAGTCTTGAACATTATAAAAACGTTTAATTTGCATCCTTAAAATCACTTGTTT[C/T]ACTATAGCCAGGCT
RM20090702301_46AG	GCAGCCTAACCGCACGGCTCAATTAGCGCTGCATCCATCAGGCCT[A/G]ACCTGTCAGGTGACCCTGGGTGCGTGGGCAGCTCT
RM20090702302_27CT	ACAGAAAAGGCAACATACTATTTCCA[C/T]CATATACTATACTGTATCTGCTACATGACAGAATGTTGGTGTGCCCCAGCATGC
RM20090702305_11CG	GGAGGAGGAT[C/G]TCTTCCCTGTAACGCACAGCGTTGACATTGCCTGCAATAACAAGCAGCTCAGTCCGATGATGCTGTGACA
RM20090702308_12AT	CTTCATGACTA[A/T]ACAAATAATTGTAATCGTAATCAAAATATATATATATTTTTCATTACTCTTCCTCTTAGGAGGTGCTTT
RM20090702309_16CT	GGCGGGGTAGAAGAG[C/T]GCGGACCTCTCGATCCTCACTGAACGCCTGACGGGCGTGAAGAATCTCAGCTCCTGTCCGTCCAA
RM20090702310_11CT	ATAGAAACAC[C/T]GAGGTGGGTTCTCTGCAATCTCTGATTGCGACATAGAGGTGATATTGAAAGGAGGAAAGCTAGTGGAGCC
RM20090702312_46GT	TGCGTAACGGGGAGCTGATCTGTAATGGTGTCCCATCCCAGGACT[G/T]CTCCCCTCAGCATTTTACCAGCCAGGCGGAGCAAA
RM20090702313_81AT	ATGTCCTACATATTTCTTTATATTGCTTTGGAAGTCAGGTAGAATGATAATTTGTCCAATATTAACTGTGGGTGATTGGC[A/T]
RM20090702314_16GT	CTGGTTGTTTAGATT[G/T]AAACTAACACTTGAGAGTTGACTAAATTGGTCTGAAACACTGCAGGGACCGCTGCCAGTTCATGA
RM20090702316_81CT	TGACACTGAAGGGAGCACTAGCTACTTTCTGATGGTCAAATAAAACCACAAATTGGTTTGAACAAATTGAATATTTTACA[C/T]
RM20090702317_10GT	AACTAGCTC[G/T]CTAATAGGCTTAAACCAGTCACAATGATCACACATTCACATCAATCACTTAAACCAAAAAAATGCACTCAA
RM20090702318_42CT	GGCCAGTCTCCGGGGGTGTACCTGCGCGAGGACCCCATCTG[C/T]GGGTCACAGGTACGGAGCTCGTTGGCTAGTGGGAGTGTG
RM20090702319_66GT	GCCCTCAAACAGGTTCCTGACTGACTGCTCCCTGCTCTTTTATAGGCAGAGAACGAGAATCAAAT[G/T]ACACAATAATGTTTT
RM20090702320_78CG	ACCCAAGGAGACTTTTCAGACTTGTATGGGAATCGATCCCATCATCTCGAAACGAAGTGCAAGGATAATAGAACAAC[C/G]CAA
RM20090702321_17AG	CGTGCTGGGGAGATTT[A/G]GATTGGGTACATACTGAACATGAGTTGACATAGTGGGCGACGTCCTGCGCCAAGGTGGGCCACC
RM20090702322_38AT	TTTCGCTGTGTGACACAGGTGTGCGAGCTAGGAGACA[A/T]CATATGGGTGAATTTTACTTCAAATGAAATGGAATCCAAGGAT
RM20090702323_46AT	CATGACGTCCTACAGAAATGTTGAAATTCCTGAAGGACCATGACA[A/T]TTCCTGCAAGACTAAGTAATCTGTGGATCATGTGT
RM20090702324_6AC	GGGTA[A/C]CACATGAGGGAGCAGGATGTCTTCCCCGTAACGCACAGCATTGAGATGTCCTGCAATGACGACAAGCTCAGTCCG
RM20090702325_78CT	TGTCTTTGAGCTGCCAGCCAAGCTTCAGCTGAACATAAATCAGGGAAAAGGGTTTTCGCTGATGAGAATCAGCTCTA[C/T]TGG
RM20090702326_56GT	GGTTGAGCTAACGTAGGCTAATGTGATTAGCATGAGGTTGTAAGCAACAAAAAAA[G/T]AAATCCCAGTACATAGACATATCTG
RM20090702327_14AG	CACAGAGCAGAGC[A/G]AACGTTGACAAAACTATATGCGTGTTCAAACTGTCGTGTCAAATTGACTTGTGATGAAATGGCTCTT
RM20090702328_66CT	ATTACATAAGGGTGAGCTGCAATTTAAGCACTGCCACTAATTGTAAATCTGGTAAATCCTCCAGA[C/T]CCTGGCGTTCACTTC
RM20090702330_55GT	GCTAACCAACCAGGTTAACTAATTAACATTAGGCTATAAATAGCAATGCAAATG[G/T]CTCTGCGATACAAATAATATTACTAC
RM20090702331_41AG	GGGATCCGTTTGGGGATGAGTTCTTCGGTGGAGGGAGGAG[A/G]CACCACAGGGGAGTGAGCAGGAGTCGAACGGGGGGACCCT
RM20090702332_76AG	GAGGAGGGTCATTAGTGATTGGAGTCACCTGGGCTCAGGGTATTTAAACTGCTTCACTAATCTCTCTGCTCCTCC[A/G]GGTAT
RM20090702333_17CT	TATTTTGCTGCGATAA[C/T]ACCGGTCAAATTAAGATACTACACGTGTAGCTTATAAACAGTGTAGTAGTCGACTGTTAAGATC
RM20090702336_79GT	TCCCTGCAGCTGCTGGCTGTGCCATAGTCTGAGACCAGACAGCACAGAGACACACTGATCATGGTCCCTGAAGGAAAA[G/T]AA
RM20090702337_79AG	GGGGGTCAGCGACTCGGTGCTCTCAGGACTCATCTGGGAGGTGGGGGTGTGGAACACGGTGCTCTGGGGGGTGGGGGA[A/G]AC
RM20090702339_63AG	GACAGTGTGATGGAGCTGGTCCCAGGCTGCTGTGTCTGTCATGGTCAGTTCGAACTATAAGG[A/G]CACAAGGCGAGACCCAAA
RM20090702340_25AG	CAGATTGGTGGTGAGGAGATTAAA[A/G]TCGAAGCACATCCTCACAAGACGGAGGTAGTCTAATTGTGGTGGACCATTGTTGAG
RM20090702341_41AG	CTACACAAATAAAATATAAAACATGCATTACCTTTGACAA[A/G]CTTCTTTTGTTGGCACTCCAATATGTCCCATAAACATCAC
RM20090702342_77AC	TGATTAAAAGCCCGGACATGTCATTACCCTCTGCTGAAGCCCCACTGCATTGTGGGTATTGAATCCATTAATATCT[A/C]AGGG
RM20090702344_65AG	AGAGTCAGGTTTTCCTCCCTCTGGCACAGTAACTCAAATTTGTCCAGGCTGCAAACAGAACAGC[A/G]GGAAAGAAGCAGTAAG
RM20090702345_62AG	TTCAAGCAGGCCCTCTCCAACTACTCACTGACCTTTGAGCTCTACGAGTCACTCTGCAACC[A/G]CACAAAGGGCGTGGCTGAA
RM20090702346_76AC	GGGTACCACGTGAGGGAGGAGGATGTCTTCCCTCTAACGCAGTGTTGAGATTGCCTGCGATGAGATTGCCTGCAA[A/C]TGACA
RM20090702347_70AC	GAGGTTTAACAACGACCTGGAACAGGTGACACAAACCTCTATGGTGACTAGAATTTCCACGGCAATCTC[A/C]CACTGACTTTA
RM20090702348_15AG	GACTCCTGTGAACA[A/G]CGTGGGGCGCAGAGCATCCACCTGCAGCCACTGGTGCTGGTCCTCATACTTAGCACACCACGCGCC
RM20090702349_31AT	AATCCCAGAGGAGTTCATAAGTGAGTGTTG[A/T]GTTTATGTATGTTTATGTGAGATAGCTAAAATATGTTATGGATTTTTTGT
RM20090702351_71AG	AGTGCTATTGTACTGAGGCACTACTGTACTGGTATGTCTTACTGGAGCCTCTCGGGCAGACTGTCAACTG[A/G]TGTGCCAAAT
RM20090702352_52CT	CACAACAGGCAGTCAGCCAGATAGTATCACGCTGGATGGTGACATGACTTC[C/T]GCACAATATTGAATCCGTGCAATTGTTAA
RM20090702353_39AC	ATGTGCAGTCGTTTCGTTTCTATCTCATGCTGTCATGG[A/C]TGAAGCTAGCGCAAATTCCTACTATGTATGTGTCCAGGTTAA
RM20090702354_22CT	TTTCTCTATGGAACCCTCTAC[C/T]ACGACTGTAGTAATGACAATAGGGCTGACCCCATTTAATTGAATGGTCGACAGATTTTT
RM20090702355_35AC	AAAGCAAAGATCCCTGTCAACATCCTGGAAAGAC[A/C]TAATATTCTGGGTGGAAATTAAGGGGAATGGTAACACGTAGGAGAT
RM20090702356_36AG	CCTGCTGGTCCCCTCCTCTGACCCCCACAAGGCAG[A/G]CTGCTTGAGGCCCCGCAAAGAGACCCTCCTATAGGCGGCTGACTG
RM20090702358_67GT	TGTCCTGTATCTTGAATGGTTTATACAAAATAAGTAAATGTTTTGATTGCACTTTTTTAAAACTTT[G/T]TTGTGATAAGAGCA
RM20090702359_1AT	[A/T]ATAGTTGAATGTGAAAAAACTGTACATCTTGTAAATTGAATATTTATGCAGACATAATGTATTCTCTCTCTATATCACAG
RM20090702360_44CT	AATATGCATCCGCATAGTTAATCATCCGACCTTCAACAAAGTA[C/T]ATGTAAAAATAAAACTACAACACCCTCAGTCCAATCA
RM20090702361_21AC	GCTCCTTACCAGGGGATCTC[A/C]TCCACAACGGCCCCTGTCCTCTCCTCCTCTCCCAGATCCACAACATCAGGGTGCAGAAGA
RM20090702362_1AG	[A/G]TATATCAACCCCTTCGTGACCTTCCTGGACCAGAGGAGATGGAAGTGTAACCTGTGCTACCGGGTCAACGACGGTAAGGA
RM20090702363_80AG	GAAACTTTAAAGAATAACTCGAAAACAAAATAGAACAGAAGTTATGTTTCTGCTTTCCACTTAACTTGAATTCTATGAT[A/G]A
RM20090702364_17AC	ATGGCAATTTCAAGTT[A/C]ACTACAGGATTTGAGATACAGTATGATGCAGAGAAACATTTGAAATGTAGTGCAATATCAGACA
RM20090702366_23AG	CAGGGGGGCCAGGGGGCCCAGA[A/G]GGACCCTCAGGTCCCAGGTCTCCACTTAAGCCTTTAGGCCCCATGTCCCCGGGGATCC
RM20090702367_35AG	GTCCCCAGAGTGCTGTGCATAGAGGAGAGCCAAG[A/G]TACTTGGAACAGAGTGGACTCCTGTATCCCATCTCTGTCAGCTAGG
RM20090702368_57CT	CTCCCAGCCTTCGCTATCATTGGGTGAGAGCGCTTAGTAAACATTCTACACACCCC[C/T]TTTAGACCCTACAGTCTTCAACTG
RM20090702369_37AG	ACCCTGTTTACAGACACTCAGGACATGTCCAGCTCC[A/G]CCCATATCCTCCATCCGTCTCTATCTCAGCTTTAGAACGCACAT
RM20090702370_33CT	CATCCTGACATGACTCCCGAGCATGACAATGG[C/T]ACCAGCCAAACTGCTTGTTCTGTGTGTGATTTCCTGCAAGACAGGAAT
RM20090702371_16AC	CAGTGCTGCTGAGGA[A/C]GAACCCCACTGAGAGGCTAGGAGGATTGTGTGTGTGTGTGTTTAATGTGTGTGTTTAGAGAGAGA
RM20090702372_72AG	GACTTCGGTCGTCAGTTGAATGGTGTTAAGCGGGCGGGTGTTAAGAAGCGCGGTTTGGTGGGTCATGGGTC[A/G]GAGGACGCA
RM20090702373_62AT	CAAGACTTTATCTCGCTAACTATCTGGAGCAGAATTATCAAAGGCAAGCAGCCAGACTAGG[A/T]CCAGACCAACACTCTGTTC
RM20090702375_50GT	CAGGGACAACACAGAGTGACGGACAGGCCCAAGAGGTGAAGGGTAAAGG[G/T]TGACGTCAAAATGGCCTGAATGGAGATATGG
RM20090702376_27CT	ACAGATGTAATGGCAATGGTGAACGA[C/T]CCCCTCCACCAGCCCGTGACATTGTTCCTGCCGTCGGACCGCGCCATGGCCGCA
RM20090702377_32CG	GGTGAGGTGCCGGAGGTCCCTTTGCCCCCTC[C/G]GGACATCGAGGGGTCCCCGAAGTACACAGTACGTGCTATCCTGGACTCT
RM20090702378_81GT	TAGCTTGGCGTCGCTCAGCTGATGACACGCCTCCTCGTACTCTGCTAGGGAGAGACTTCTGTATGCCACACACAGGGTCC[G/T]
RM20090702379_73GT	AAGTAAGTGTTTGTGTGTCAGGGAGAGAAAGACTTGCAGAGCTTAGCCAAAAAGTTCCCAGTGTGAATACAT[G/T]CTCTGCTA
RM20090702380_59AG	GCTACTGTTTCTGTCTACTTCTATCTATCCCTGTCTGTCTGCCTCTATCCAACTTTAT[A/G]CTGGTTCATTCTGAGCTTTTAC
RM20090702381_31GT	TCCCTTTCCCCATCTTCCTCTGCACCTGGT[G/T]TCACAACAGGAAGAATCCATTTCAGAAATGCTACTTACTGTATAAAAAAC
RM20090702382_51CT	TGCATGCTCCAGCTGGAGTTCCCCCACCCACTAGTACCCGACTCCCTCAC[C/T]GTGTGGGTCACCTTCTTCAGCCCCGAGGAG
RM20090702383_6CT	CTCAG[C/T]TATGTCTCCCTCCACTTCTGTGTGTGTTGTGCCACTGTTTCCAGGAGCTGGTTAGGCGCCTCGCCTTTTAAAGGT
RM20090702385_41AC	AGGTTGCTAGACTTTAGAAAATACTAAAACAGTTTTAATT[A/C]TTGGGTTATTGTACTATATTCCGGTGTGGCAGTTGTAGTA
RM20090702386_27CT	AGCAACGTGCGACTCAAGCTGACCAT[C/T]GTCAACACAGTGGGCTTTGGGGACCAGATGAACAAGCAGGAGAGGTGAGAGAAG
RM20090702387_61AC	TCTGTAACGTTGCACAACATTGAACAATGGCCTGGTGTCATATGTCACAGCAAGGCCATA[A/C]GTGCAGCCTGCTGAGTCTTT
RM20090702388_73CT	ATGCTTTTTGGAATGTTGTGTCAAAAAAGCACATATCTTTATTACAGACAGACCTCTCAGCATCTTTACAAC[C/T]ATTGAATC
RM20090702390_60AG	GAGCCAGAGAACACAGACAGTCATGTTAAACTGTGTTACGCTGCTCATTGTCCGTTAGC[A/G]TGCAGGGGGAGCCAGAGAACA
RM20090702391_34AG	GCAGAGGTTGGTCTTATCAACCAGTTATAATCT[A/G]ATGGCTAATGACTACTACTTTGGAGGCCTGTCCGGTTGCAATTTATA
RM20090702392_33AG	ACTTGGATCTCCTTTTGTGGGTGTGTTTTTGC[A/G]TCTACATTATTTTCACAATATGGACCATTTTAAGGTTGTGAATGTTGG
RM20090702393_79AG	AACAAACAAAGCTTCTTTACTCAACATCAACTAACTCAACCTTACAATGACTTACTGGATTGACTTATTTTAGTTCAT[A/G]GT
RM20090702394_8AG	TACTTGT[A/G]TTGGTTCCAATCGATGCGTTAACGTCGAGTGGTTTGCGGTAAACTGGGTCCCATCGCCATGTGATGTCTTCCA
RM20090702395_19GT	AGGTACCACAGGAGGGAG[G/T]ACACCGCCCCAGACCATGACGGACCCTCCACCTCCAAATCGATCCCGCTCCAGAGTACAGGC
RM20090702396_17GT	GACCTCGATTGTCAGT[G/T]GAACAGTGTTTCCTCAGATACATTGTTGCAACTAGCAGACAGGTGTTAAGCAGGGCAGTTTGGC
RM20090702397_17AG	AGACCTACATTCTGGC[A/G]TCCGTCAGACCCCAAATAATGCAGTGGTGCCATACCTCGCTGAGTTCTGGCCATCCCGGGATCA
RM20090702398_59CT	CATTGTGCTCTTTAGAGATGCTTCATGTCGTGGAGTGATGTTCTTGTTTACTTGTTGC[C/T]AGACTGACAGACAACAACAAAA
RM20090702400_43AC	AGGGTGATCCTGACACGGAAGGAGGGCGAGTCTTCCAAGTGT[A/C]TAAACGAGCTGCTGCTGAGCCGCATGTCGCGCTTCCGC
RM20090702401_44AG	CGACACAAAACGCAGAAATAAAAATATAATTCATGACTTTGAC[A/G]AGCTTCTGTTGTTGGCACTCCAATATGTCCCATAAAT
RM20090702402_20GT	GGACACAAAGCAAGTCTTC[G/T]AGCAAAGCGCAAAGCGTGTGCCCCTCTCCACTGTCCTCCGGTATTCATTTAGCAAACTTGA
RM20090702403_47AC	TGAAATATGATACTCTCTCATTGTTTACTGTTGTGCTATCATCAGA[A/C]AATAGCATCTTATGCTTTCGCCGAAAATCCTTTT
RM20090702404_43AC	TAGCAGGGTTCTCTCTGCAGACACACACATTAACCAGTTATC[A/C]TACACTCGGCAGTTTATTTATTAAACCACTCACATCAA
RM20090702406_2CT	C[C/T]TTGAGGACTGACTGCTGAGGGAGCAGATGGTGCTGCTGTATAGGAAGCATCATCTGTGTTCACTGAATGGGGCTGCCAG
RM20090702407_54CT	GAATAGGGCCAGGCTGGGACTGGGGAGGAGGGTTGGAATGTGCCTTTGATCTG[C/T]AGGCTGTCTGGTGCTAACCTAACCTCC
RM20090702408_9AC	CTCCTCAA[A/C]TTCAAACTGCAAAATGCACATCAACCCCAGTTTAAGTTCAAGAGAGGAGTTCAACCAGCAATATATCTTTCA
RM20090702409_43CT	TGATGCCCCTTATTGAACAAAGCATAGCTCAAGTTTTAAACT[C/T]ATTCATTAAGTGAATGGTAACAGACCCCTTCTGCCTTC
RM20090702410_64CT	GTTGGCTGGAGGCTAACAGAGGAGACTGGGCTGCCATCTTGGATTCCCAGACCCAGACTGGTG[C/T]ACCCAAGGGCTCAGGGG
RM20090702411_40AG	TTTGGCATTCCAGTTGTCAATTTGTTGAGGTAATCTGAA[A/G]AGATTTCACCCCATGCTTCCTGAAGCACCTCCCACAAATTG
RM20090702412_36AC	AGCTACAGGATGGCAAAAACAACTGCCCGAGTTAG[A/C]CCAGGAATGCACAATCCTTCCATCAGTGTTCAGACTGTCCGCAAT
RM20090702413_70AT	CCTCCGCTCAGAGGACTGACACATGGAATCATCACAAAGAGCCCAACAAGAACCGGCTGCTTCAGTCAC[A/T]CCTCCACTCTC
RM20090702414_29AC	TAAGAGAAAAAAACAGGACAAGTACATA[A/C]AAATCATTAACTCAATAGACAAGAAAACATAACGTGAACAATGCATTCATTA
RM20090702415_42GT	TTTACGTCAACAGATTTTATTTTCCATACAGAATCTCTCTC[G/T]TCGCAGTTCAACTGTCAATTTTTTCAAATCTACATTCAG
RM20090702416_46CT	GAGGAGAACAAGGAGAACAAGTTTACACTTCCTGTCCTCACTCAG[C/T]ACAGTAAACAACCAGGTACCACCAGATAGATACGG
RM20090702417_52CT	TCTGACTGACGATGTAGTATCATTACCCTTAACATTAGTCTCTCTGTGAGT[C/T]ATCTGTGTGCCTTTAACCCAGACCTCTCC
RM20090702418_47CT	TCTAATTTGAGTCAGAAAAGGATGTTCATATGATAGGGAAGATATA[C/T]AAAACCTTGCAGATAGCATATCCAACTGACCATC
RM20090702420_79AG	TGTGGGCAGTGATGGAGGAAAAGAGGACAGGAGGAGAGGAGGGGAAGGAATGTTGAAAGGAGTAGAGGAGTGTCTAGA[A/G]GG
RM20090702422_42GT	CTCTAAGGACTACTGCCCCTGCAGTTCCTCTAAGGACTACT[G/T]CCCCTGCAGTTCCTCTAAGGACTACTGCCCCTGCAGTTC
RM20090702424_19AG	GGTGAAGTTCTCCAATAC[A/G]CTGTTCATCATGTACTTCTCTGGCAGGTGTTTGAGCTTGTGGATGAAGTTGATCATGTATTC
RM20090702425_27GT	GATGTGGGGCCGTTTGGAGGAGAGGG[G/T]GAACAAGGACAGCAGGGAATGAGAGTGAGTCCTGAGTACTTCAGAATACTTTTT
RM20090702426_11AC	CTTTTTACAT[A/C]ATGCATTTTATATTATGCATGTACAATTTTTGGACACTCTTAGAAAACAGGGTTCCTGTTTTGGTTCCAC
RM20090702427_72AC	ATGTTCATCGTTCACAACATCGAAGAGATCCAGGTAAAAGACATGGGGACACCGTCACCAACCGTTTACTG[A/C]TTTACGTCC
RM20090702428_18AG	AAAAGGTGCTCAACAAA[A/G]CCAAAATGACAGCAAGCTGTGTCTGAGAACACTAATGAAGGCCTGTGTTATAGTTTAGCAGGA
RM20090702430_52AG	ATGTACTTGTAGTGTATGTCACAATGGCATAAAGAGATTTGGGAGACAGGC[A/G]CAGGAATGCGTAACAGGGATTTTTATTCA
RM20090702431_49CT	AGTGGGTGCACGTATATCCTAATTCTCCTTCATAGGAAAAACCATAGA[C/T]ACAAATCATTACAGCTCTAGGAAAAACACAGA
RM20090702432_17AG	ACGGTGTGGTGGAGCT[A/G]AAGAGCATGCAGGGCAAAGCAGAGGTGATGTTATTAGATATGTTTCAAACCTATTGCTTTTATA
RM20090702433_4CT	AAT[C/T]GGACCCAGAGACGCCCAAACCACCGAGACAACACCGCTGTTCCCAGTGTGGAAAGAGTTTTAAGTGGTTAAGGAACC
RM20090702434_62AG	ACAGCAACTCACACAGCAACTCATAATGGACATAGCATAAAAAGTAATGTTATGAAACACA[A/G]GTTTCTTTAGAAACATTTG
RM20090702436_72AG	AGGCAGAAGTACCATCACACACACACATTCATGTAACAAAATAGGTTCCATCCTTGTCTCTCACTAGGCTC[A/G]AACCTGTAC
RM20090702437_28CG	AGAGGGGGAGGACAAGAAGAGAGAGCA[C/G]GGAGGAGGTAATGAGAAGGAGAACAGGATGGGAGGGAAGGTGGATAGGTGTGG
RM20090702438_76AT	GGGTACCACATGAGGGAGGAGGATGTCATCCATGTAACGCGTTGAGATTGCCTGCAATGACAACAAGCTCAGTCC[A/T]ATGAC
[truncated: 3,613 more rows]

## Sheet: Omy1
	Sex averaged map:			Sex specific maps:
	Theta	Kosambi	cM	Theta Female	Kosambi	cM	Theta Male	Kosambi	cM
RM20090706123			0			0			0
	0.043	4.3		0.04	4.3		0	0
RM20090704120			4.3			4.3			0
	0.033	3.3		0.03	3.3		0	0
RM20090703917			7.6			7.6			0
	0.017	1.7		0.02	1.7		0	0
RM20090702609			9.2			9.2			0
	0.042	4.2		0.04	4.2		0	0
RM20090700458			13.4			13.4			0
	0.019	1.9		0.02	1.7		0.03	2.8
19NUIG			15.4			15.1			2.8
	0.018	1.8		0.03	3		0	0.4
RM20090705321			17.2			18.2			3.2
	0.013	1.3		0.02	2.2		0	0.4
RM20090705247			18.5			20.4			3.6
	0.016	1.6		0.03	3		0	0.4
RM20090702418			20.1			23.4			4
	0.005	0.5		0.01	1		0	0.5
RM20090706092			20.6			24.4			4.5
	0.005	0.5		0.01	0.6		0	0.5
RM20090704846			21.2			25			5
	0.019	1.9		0.03	3.2		0	0.5
RM20090700650			23.1			28.2			5.5
	0.02	2		0.06	6.1		0	0
RM20090700562			25.1			34.4			5.5
	0.017	1.7		0.03	3.2		0	0
RM20090705597			26.7			37.5			5.5
	0.02	2		0.04	3.8		0	0
RM20090705303			28.7			41.3			5.5
	0.03	3		0.06	5.7		0	0
RM20090704394			31.7			47.1			5.5
	0.023	2.3		0.04	4.5		0	0
OMM1205			34			51.5			5.5
	0.01	1		0.02	1.9		0	0
RM20090700198			35			53.5			5.5
	0.004	0.4		0.01	0.8		0	0
RM20090706684			35.4			54.3			5.5
	0.016	1.6		0.03	3.2		0	0
OMM1302			37			57.5			5.5
	0.014	1.4		0.03	2.9		0	0.1
RM20090700266			38.4			60.4			5.6
	0.048	4.8		0.1	10.4		0	0.1
RM20090704715			43.2			70.8			5.7
	0.043	4.3		0.09	9.1		0	0.1
RM20090701414			47.6			79.9			5.8
	0.019	1.9		0.05	4.9		0	0.1
RM20090705642			49.4			84.8			5.9
	0.021	2.1		0.05	4.8		0	0.1
RM20090700374			51.6			89.6			6.1
	0.014	1.4		0.03	2.7		0	0.1
RM20090702911			53			92.2			6.2
	0.019	1.9		0.04	4.4		0	0.1
RM20090706067			54.9			96.7			6.3
	0.013	1.3		0.03	3.3		0	0
RM20090704206			56.2			100			6.3
	0.014	1.4		0.02	2.2		0	0.4
RM20090703478			57.6			102.2			6.8
	0.013	1.3		0.03	3.2		0	0
RM20090706098			58.9			105.3			6.8
	0.028	2.8		0.06	6.3		0	0
RM20090704298			61.6			111.6			6.8
	0.006	0.6		0.02	1.7		0.01	0.8
RM20090705791			62.3			113.3			7.6
	0.038	3.8		0.06	5.7		0.01	0.8
RM20090702174			66.1			119			8.4
	0.03	3		0.05	4.7		0.01	1.2
OMY1032UW			69.2			123.7			9.6
	0.025	2.5		0.05	5		0	0
OMM1543			71.6			128.7			9.6
	0.002	0.2		0	0.4		0	0
OMM1082			71.9			129.1			9.6
	0.008	0.8		0.01	1.1		0	0.3
RM20090700327			72.6			130.2			9.9
	0.024	2.4		0.04	4.1		0	0.3
RM20090702020			75			134.3			10.2
	0.011	1.1		0.03	2.9		0	0.2
OMM5288			76.1			137.2			10.5
	0.048	4.8		0.08	7.9		0	0.2
RM20090705495			80.9			145.1			10.7
	0.012	1.2		0.03	2.8		0	0.2
RM20090706108			82.1			147.9			10.9
	0.012	1.2		0.03	2.7		0	0
RM20090701492			83.3			150.5			10.9
	0.004	0.4		0.01	0.9		0	0
OMM1776			83.7			151.4			10.9
	0.012	1.2		0	0		0.02	2.5
RM20090705472			85			151.4			13.4
	0.03	3		0.03	3		0	0
RM20090703643			88			154.5			13.4
	0.065	6.5		0.07	6.5		0	0
RM20090700467			94.6			161			13.4
	0.074	7.4		0.07	7.4		0	0
RM20090706845			102			168.4			13.4
There are 47 mar	kers in	unique	map po	sitions.

## Sheet: Omy2
Current map :
	Sex averaged map:			Sex specific maps:
	Theta	Kosambi	cM	Theta Female	Kosambi	cM	Theta Male	Kosambi	cM
OMM1391d			0			0			0
	0.017	1.7		0.02	1.7		0	0
OMM1131			1.7			1.7			0
	0.025	2.5		0.05	5.1		0	0.1
RM20090703397			4.3			6.8			0.1
	0.013	1.3		0.03	2.5		0	0.1
RM20090702368			5.5			9.3			0.3
	0.013	1.3		0.03	2.5		0	0.1
RM20090703521			6.8			11.9			0.4
	0.039	3.9		0.08	7.6		0	0.2
RM20090700129			10.7			19.5			0.6
	0.039	4		0.08	7.6		0	0.2
RM20090703144			14.7			27.1			0.9
	0.026	2.6		0.05	5.1		0	0.2
RM20090701587			17.3			32.2			1.1
	0.039	4		0.08	7.6		0	0.2
RM20090702472			21.3			39.8			1.3
	0.021	2.1		0.04	4		0	0.2
RM20090702719			23.4			43.8			1.5
	0.032	3.2		0.07	6.9		0	0.2
RM20090701660			26.6			50.7			1.7
	0.01	1		0.02	2.4		0.01	0.6
RM20090702918			27.6			53.1			2.3
	0.022	2.2		0.04	3.5		0.01	0.6
RM20090700142			29.8			56.6			2.9
	0.039	3.9		0.06	6.2		0.01	0.6
RM20090701292			33.7			62.8			3.5
	0.056	5.6		0.12	12.6		0	0
RM20090704734			39.3			75.4			3.5
	0.017	1.7		0.03	3.4		0	0
RM20090701473			41			78.8			3.5
	0.012	1.2		0.03	2.5		0	0
RM20090704099			42.2			81.3			3.5
	0.044	4.4		0.09	9.2		0	0
RM20090701264			46.6			90.5			3.5
	0.013	1.3		0.03	2.8		0	0
RM20090704395			48			93.3			3.5
	0.018	1.8		0.04	3.9		0	0
RM20090704511			49.7			97.2			3.5
	0.012	1.2		0.02	2		0	0.1
RM20090704204			50.9			99.2			3.6
	0.013	1.3		0.03	2.5		0	0.1
RM20090700157			52.2			101.7			3.7
	0.017	1.7		0.03	3.4		0	0.1
RM20090705824			53.9			105.1			3.9
	0.017	1.7		0.03	3.4		0	0.1
RM20090700054			55.6			108.4			4
	0.013	1.3		0.03	2.5		0	0.1
RM20090701176			56.9			111			4.2
	0.026	2.6		0.05	5.1		0	0.1
RM20090702349			59.5			116			4.3
	0.046	4.7		0.09	9.4		0	0.1
RM20090701615			64.1			125.5			4.4
	0.021	2.2		0.04	4.3		0	0.1
RM20090700120			66.3			129.8			4.6
	0.021	2.1		0.04	4.2		0	0.1
OMM5198			68.4			134			4.7
	0.004	0.4		0.01	0.7		0	0
RM20090701970			68.8			134.7			4.7
	0.009	0.9		0.01	1.4		0	0
RM20090703816			69.7			136.1			4.7
	0.012	1.2		0.02	1.9		0	0
RM20090700307			70.9			137.9			4.7
	0.006	0.6		0.01	0.9		0	0
RM20090706211			71.4			138.9			4.7
	0.013	1.3		0.02	2.1		0	0
RM20090705074			72.7			141			4.7
	0.005	0.5		0.01	1.4		0	0
RM20090700687			73.2			142.4			4.7
	0.012	1.2		0.02	2.1		0	0
RM20090703793			74.4			144.5			4.7
	0.014	1.4		0.03	2.8		0	0
RM20090705130			75.8			147.2			4.7
	0.009	0.9		0.01	1.4		0	0
RM20090705390			76.6			148.6			4.7
	0.013	1.3		0.02	2.1		0	0
RM20090705612			77.9			150.7			4.7
	0.012	1.2		0	0		0.03	2.5
RM20090706301			79.1			150.7			7.2
	0.034	3.4		0.03	3.2		0	0
RM20090700522			82.5			153.9			7.2
	0.098	10		0.09	9.5		0	0
RM20090704137			92.4			163.4			7.2
	0.042	4.2		0.04	4		0	0
OMM1347			96.6			167.4			7.2
	0.004	0.4		0	0.4		0	0
OMY1INRA			97.1			167.8			7.2
	0.01	1		0.01	1		0	0
RM20090704783			98			168.8			7.2
	0.017	1.7		0.02	1.7		0	0
RM20090700950			99.7			170.5			7.2
There are 46 mar	kers in	unique	map po	sitions.

## Sheet: Omy3
Current map :
	Sex averaged map:			Sex specific maps:
	Theta	Kosambi	cM	Theta Female	Kosambi	cM	Theta Male	Kosambi	cM
RM20090703260			0			0			0
	0.093	9.4		0.09	9.4		0	0
RM20090701372			9.4			9.4			0
	0.024	2.4		0.02	2.4		0	0
OMM1391a			11.8			11.8			0
	0.013	1.3		0.01	1.3		0	0
RM20090701234			13.1			13.1			0
	0.026	2.6		0.03	2.6		0	0
RM20090705531			15.7			15.7			0
	0.067	6.7		0.07	6.7		0	0
RM20090705484			22.4			22.4			0
	0.03	3		0.03	3		0	0
OMM5121			25.4			25.4			0
	0.004	0.4		0.01	0.8		0	0
RM20090706347			25.8			26.3			0
	0.015	1.5		0.03	3.4		0	0
RM20090700829			27.3			29.6			0
	0.018	1.8		0.04	4.2		0	0
RM20090705457			29.1			33.8			0
	0.021	2.1		0.04	4.2		0	0
RM20090702671			31.2			38			0
	0.024	2.4		0.05	5.1		0	0
RM20090704050			33.6			43.1			0
	0.008	0.8		0.02	1.7		0	0
RM20090705820			34.4			44.8			0
	0.012	1.2		0.03	2.5		0	0
RM20090706748			35.6			47.3			0
	0.008	0.8		0.02	1.7		0	0
RM20090700257			36.4			49			0
	0.02	2		0.04	4.2		0	0
RM20090700812			38.3			53.2			0
	0.031	3.1		0.07	6.7		0	0
RM20090702956			41.4			59.9			0
	0.043	4.3		0.09	9.4		0	0
RM20090702953			45.7			69.3			0
	0.009	0.9		0.02	1.9		0	0
RM20090706157			46.6			71.2			0
	0.012	1.2		0.02	1.8		0	0.4
RM20090705101			47.8			73			0.4
	0.021	2.1		0.05	4.5		0	0.1
RM20090702888			49.9			77.5			0.5
	0.035	3.5		0.08	7.6		0	0.1
RM20090703819			53.4			85			0.7
	0.014	1.4		0.03	2.9		0	0.1
RM20090706669			54.8			88			0.8
	0.009	0.9		0.02	1.8		0	0
RM20090705885			55.7			89.8			0.8
	0.012	1.2		0.03	2.5		0	0
RM20090702413			56.9			92.3			0.8
	0.013	1.3		0.03	3.4		0	0
RM20090703589			58.2			95.7			0.8
	0.004	0.4		0.02	1.7		0	0
RM20090702526			58.6			97.3			0.8
	0.013	1.3		0.03	2.5		0	0
RM20090703089			59.9			99.8			0.8
	0.004	0.4		0.01	0.8		0	0
RM20090705694			60.3			100.7			0.8
	0.008	0.8		0.02	1.7		0	0
RM20090700844			61.1			102.4			0.8
	0.019	1.9		0.04	4.2		0	0
RM20090704648			63			106.6			0.8
	0.019	1.9		0.04	4.2		0	0
RM20090703972			64.9			110.8			0.8
	0.011	1.1		0.03	2.6		0	0
RM20090702048			66			113.3			0.8
	0.008	0.8		0.02	1.7		0	0
RM20090701633			66.7			115			0.8
	0.011	1.1		0.03	2.5		0	0
RM20090704226			67.9			117.5			0.8
	0.026	2.6		0.06	6		0	0
RM20090705384			70.5			123.5			0.8
	0.025	2.5		0.06	5.7		0	0
RM20090702091			73			129.3			0.8
	0.013	1.3		0.03	2.8		0	0
OMM5324			74.3			132.1			0.8
	0.006	0.6		0.01	1.3		0	0
RM20090705655			74.9			133.4			0.8
	0.009	0.9		0.02	2		0	0
RM20090702599			75.9			135.4			0.8
	0.025	2.5		0.05	5.3		0	0
RM20090703618			78.4			140.7			0.8
	0.01	1		0.02	1.6		0	0.4
RM20090705428			79.4			142.3			1.2
	0.016	1.6		0.03	2.6		0	0.4
OMM5164			81			144.9			1.6
	0.022	2.2		0.03	3.3		0.01	0.5
RM20090700473			83.2			148.2			2.1
	0.017	1.7		0.03	2.5		0.01	0.5
RM20090704692			84.8			150.8			2.6
	0.026	2.7		0.06	5.9		0.01	0.5
RM20090706029			87.5			156.7			3.2
	0.014	1.4		0.04	4.1		0	0.4
RM20090701049			88.9			160.8			3.5
	0.021	2.1		0.03	3		0	0.4
RM20090702693			91			163.8			3.9
	0.015	1.5		0.02	2.1		0	0.4
RM20090700899			92.5			165.9			4.2
	0.013	1.3		0.03	3.1		0	0
RM20090705783			93.9			169.1			4.2
	0.012	1.2		0.03	2.6		0	0
RM20090706156			95			171.7			4.2
	0.003	0.3		0.01	0.8		0	0
RM20090706805			95.4			172.4			4.2
	0.01	1		0.02	2		0	0.1
RM20090703428			96.3			174.4			4.4
	0.037	3.7		0.08	7.7		0	0.1
RM20090702660			100			182.1			4.5
	0.012	1.2		0.02	2.4		0	0.1
OMM1085			101.2			184.6			4.6
	0.008	0.8		0.01	0.8		0.03	3.2
RM20090704651			102			185.4			7.8
	0.025	2.5		0.02	2.5		0.03	3.2
RM20090706071			104.5			187.8			11
	0.055	5.5		0.05	5.4		0.03	3.2
RM20090706578			110			193.2			14.1
There are 58 mar	kers in	unique	map po	sitions.

## Sheet: Omy4
Current map :
	Sex averaged map:			Sex specific maps:
	Theta	Kosambi	cM	Theta Female	Kosambi	cM	Theta Male	Kosambi	cM
RM20090704608			0			0			0
	0.042	4.2		0	0		0.08	8.2
RM20090700175			4.2			0			8.2
	0.058	5.9		0	0		0.11	11.4
OMM1194			10			0			19.6
	0.078	7.9		0	0		0.2	20.6
RM20090701148			17.9			0			40.3
	0.052	5.2		0	0		0.08	8
RM20090700638			23.1			0			48.2
	0.09	9.1		0	0		0.14	14.2
RM20090702972			32.2			0			62.4
	0.028	2.8		0.05	4.7		0.01	1
RM20090700509			35			4.7			63.4
	0.033	3.3		0.06	5.8		0.01	1
RM20090704063			38.3			10.5			64.4
	0.03	3		0.03	3.5		0.01	0.9
RM20090703748			41.3			14			65.3
	0.008	0.8		0.01	1		0.01	0.9
OMM1211			42			15			66.2
	0.014	1.4		0.03	3.1		0	0
RM20090703000			43.4			18.1			66.2
	0.055	5.5		0.12	12.1		0	0
RM20090702220			49			30.2			66.2
	0.026	2.6		0.06	5.6		0	0
RM20090700090			51.5			35.8			66.2
	0.008	0.8		0.02	1.6		0	0
RM20090703135			52.3			37.4			66.2
	0.008	0.8		0.02	1.6		0	0
RM20090703148			53.1			39			66.2
	0.015	1.5		0.05	4.9		0	0
RM20090704304			54.6			44			66.2
	0.025	2.5		0.07	6.6		0	0
RM20090700496			57.1			50.5			66.2
	0.035	3.5		0.07	7		0	0
RM20090704555			60.6			57.5			66.2
	0.031	3.1		0.06	6.1		0	0
RM20090706583			63.7			63.7			66.2
	0.037	3.7		0.07	7.4		0	0
RM20090702482			67.4			71.1			66.2
	0.004	0.4		0.01	0.9		0	0
RM20090700368			67.8			71.9			66.2
	0.022	2.2		0.04	4.4		0	0
RM20090704987			70.1			76.3			66.2
	0.037	3.7		0.07	7.5		0	0
RM20090702928			73.8			83.8			66.2
	0.045	4.5		0.09	9.2		0	0
RM20090703534			78.3			93.1			66.2
	0.019	1.9		0.04	3.9		0	0
RM20090706587			80.2			96.9			66.2
	0.017	1.7		0.03	3.3		0	0
RM20090700677			81.8			100.2			66.2
	0.008	0.8		0.02	1.6		0	0
BX087219			82.7			101.8			66.2
	0.01	1		0.02	1.7		0	0.4
OMM1170			83.7			103.5			66.6
	0.017	1.7		0.03	2.7		0	0.4
RM20090702256			85.4			106.2			67
	0.009	0.9		0.02	1.8		0	0.2
OMY4DIAS			86.3			107.9			67.1
	0.019	1.9		0.03	3.4		0	0.2
RM20090706595			88.2			111.3			67.3
	0.007	0.8		0.01	1.4		0	0.2
RM20090705286			88.9			112.7			67.4
	0.004	0.4		0.01	0.8		0	0.2
RM20090704525			89.3			113.5			67.6
	0.013	1.3		0.02	2.3		0	0.2
RM20090704416			90.6			115.8			67.8
	0.016	1.6		0.03	3.1		0	0
OMM1449			92.2			118.9			67.8
	0.008	0.8		0.02	1.6		0	0
RM20090704886			93			120.4			67.8
	0.016	1.6		0.03	3.1		0	0
RM20090703669			94.5			123.6			67.8
	0.017	1.7		0.03	3.3		0	0
RM20090700674			96.2			126.9			67.9
	0.014	1.4		0.03	2.9		0	0
RM20090702441			97.6			129.8			67.9
	0.022	2.2		0.04	4.3		0	0
RM20090704454			99.8			134.1			67.9
	0.011	1.1		0.02	2.2		0	0
RM20090700593			100.9			136.3			68
	0.017	1.7		0.03	3.3		0	0
RM20090706643			102.5			139.6			68
	0.02	2		0.04	4		0	0
RM20090704542			104.5			143.6			68
	0.033	3.3		0.07	6.6		0	0
RM20090704251			107.8			150.2			68.1
	0.016	1.6		0.03	3.3		0	0
RM20090706168			109.4			153.5			68.1
	0.008	0.8		0.02	1.5		0	0
RM20090702208			110.2			155.1			68.1
	0.014	1.4		0.03	2.7		0	0
OMM1322			111.6			157.8			68.2
	0.039	3.9		0.02	2.1		0.05	5.4
RM20090703352			115.5			159.9			73.6
	0.046	4.6		0.03	2.9		0.08	8.4
RM20090703054			120.1			162.9			82
	0.03	3.1		0.02	1.8		0.08	8.4
RM20090705888			123.2			164.7			90.3
	0.037	3.8		0.02	2.2		0.08	8.4
RM20090702630			126.9			166.9			98.7
	0.044	4.5		0.03	2.6		0.08	8.4
RM20090703626			131.4			169.5			107.1
	0.038	3.8		0.02	2.2		0.08	8.4
RM20090701326			135.1			171.7			115.5
	0.038	3.8		0.02	2.2		0.08	8.4
OMM1582			138.9			173.8			123.9
	0.06	6.1		0.04	3.8		0.08	8.4
OMM1408			145			177.7			132.2
	0.036	3.6		0	0		0.03	3.5
RM20090702878			148.5			177.7			135.7
	0.033	3.3		0	0		0.03	3.3
RM20090702932			151.8			177.7			139
There are 57 mar	kers in	unique	map po	sitions.

## Sheet: Omy5
Current map :
	Sex averaged map:			Sex specific maps:
	Theta	Kosambi	cM	Theta Female	Kosambi	cM	Theta Male	Kosambi	cM
RM20090704793			0			0			0
	0.075	7.5		0.02	1.5		0.13	13.5
OMM1075			7.5			1.5			13.5
	0.143	14.7		0	0		0.29	33.8
RM20090706728			22.3			1.5			47.3
	0.02	2		0	0.2		0.05	4.6
RM20090702333			24.3			1.7			51.9
	0.005	0.5		0	0.2		0.01	0.9
RM20090703128			24.8			1.8			52.8
	0.005	0.5		0	0.2		0.01	0.9
OMM1636			25.3			2			53.7
	0.015	1.5		0	0		0.03	3.3
RM20090704033			26.8			2			57
	0.038	3.9		0	0		0.09	9.5
RM20090706465			30.7			2			66.5
	0.011	1.1		0.02	2.3		0	0
RM20090702194			31.8			4.3			66.5
	0.028	2.8		0.04	4.1		0.03	2.6
OMM1508			34.6			8.4			69.1
	0.051	5.1		0.07	7.3		0.03	2.6
RM20090703195			39.7			15.6			71.7
	0.111	11.3		0.12	11.9		0.29	32.7
RM20090706633			51			27.5			104.4
	0.407	56.9		0.45	76.1		0.29	32.7
RM20090703292			107.9			103.5			137.1
	0.234	25.4		0	0		0.42	62.5
RM20090706175			133.4			103.5			199.6
	0.05	5		0	0		0.07	7.5
RM20090706724			138.4			103.6			207.2
	0.011	1.1		0	0		0.03	3.3
RM20090703936			139.5			103.6			210.4
	0.072	7.3		0	0		0.13	13.1
RM20090701786			146.8			103.6			223.5
	0.029	3		0	0		0.05	5.2
RM20090700660			149.7			103.6			228.7
	0.055	5.6		0	0		0.1	9.9
RM20090704342			155.3			103.6			238.6
	0.02	2		0	0		0.04	3.5
OMM5025			157.3			103.6			242.1
	0.043	4.3		0.01	0.6		0.08	8.1
RM20090706680			161.6			104.2			250.2
	0.007	0.7		0.01	0.6		0.01	0.7
OMM1660			162.3			104.8			250.8
	0.003	0.3		0.01	0.7		0	0
RM20090704607			162.6			105.5			250.8
	0.007	0.7		0.01	1.4		0	0
RM20090702477			163.3			106.9			250.8
	0.045	4.6		0.09	9.4		0	0
RM20090703838			167.8			116.2			250.8
	0.037	3.7		0.08	7.7		0	0
OMM5035			171.6			123.9			250.8
	0.024	2.4		0.03	3.3		0	0
RM20090704490			173.9			127.2			250.8
	0.022	2.2		0.03	3.2		0	0
RM20090703605			176.2			130.4			250.8
	0.014	1.4		0.02	2		0	0
RM20090706532			177.6			132.5			250.8
	0.014	1.4		0.02	2		0	0
RM20090700491			179			134.5			250.8
	0.017	1.7		0.02	2.4		0	0
RM20090704815			180.7			136.9			250.8
	0.013	1.3		0.02	1.8		0	0
RM20090704661			182			138.7			250.8
	0.032	3.2		0.05	4.6		0	0
OMM1439			185.2			143.4			250.8
	0.035	3.6		0.06	6.3		0	0
RM20090704048			188.7			149.7			250.8
	0.02	2		0.04	3.6		0	0
RM20090702332			190.8			153.3			250.8
	0.031	3.1		0.05	4.6		0	0
RM20090706444			193.8			157.9			250.8
	0.016	1.6		0.04	3.7		0.01	0.8
RM20090704387			195.4			161.5			251.6
	0.028	2.8		0.05	4.9		0.01	0.8
RM20090701058			198.2			166.5			252.5
	0.012	1.2		0.02	1.6		0.01	1
RM20090701534			199.4			168.1			253.5
	0.018	1.8		0.02	2.5		0.01	1
RM20090700106			201.3			170.6			254.6
	0.01	1		0.02	1.6		0	0.2
RM20090704517			202.3			172.2			254.8
	0.01	1		0.02	1.6		0	0.2
RM20090702883			203.3			173.9			255.1
	0.008	0.8		0.01	1.2		0	0.2
RM20090704645			204.1			175.1			255.3
	0.008	0.8		0.01	1.2		0	0.2
RM20090706079			204.8			176.3			255.6
	0.015	1.5		0.02	2.5		0	0.2
RM20090705411			206.4			178.8			255.8
	0.015	1.5		0.02	2.5		0	0.2
RM20090701810			207.9			181.2			256.1
	0.006	0.6		0.01	1		0	0.2
RM20090704730			208.5			182.3			256.3
	0.021	2.1		0.03	3.4		0	0.2
RM20090706395			210.6			185.7			256.6
	0.032	3.2		0.06	6.1		0	0.2
RM20090702381			213.9			191.8			256.8
	0.026	2.6		0.02	2.3		0	0
RM20090704380			216.5			194.1			256.8
	0.097	9.8		0.09	9.4		0	0
RM20090705219			226.3			203.5			256.8
There are 51 mar	kers i	n unique	map po	sitions.

## Sheet: Omy6
Current map :
	Sex averaged map:			Sex specific maps:
	Theta	Kosambi	cM	Theta Female	Kosambi	cM	Theta Male	Kosambi	cM
RM20090700271			0			0			0
	0.033	3.3		0.03	3.3		0	0
OMM5306			3.3			3.3			0
	0.045	4.6		0.04	4.2		0	0
RM20090706791			7.9			7.6			0
	0.045	4.6		0.04	4.2		0	0
RM20090702970			12.4			11.8			0
	0.079	8		0.07	7.4		0	0
RM20090704042			20.4			19.2			0
	0.037	3.7		0.03	3.5		0	0
RM20090703813			24.1			22.7			0
	0.028	2.8		0.02	2.4		0	0
RM20090704688			26.9			25.1			0
	0.039	3.9		0.07	7.3		0	0
RM20090700828			30.9			32.3			0
	0.026	2.6		0.05	4.6		0	0
RM20090701948			33.5			37			0
	0.01	1		0.02	1.8		0	0
RM20090706782			34.5			38.8			0
	0.005	0.5		0.01	0.8		0	0
ONE10ASC			35			39.6			0
	0.01	1		0.02	2		0	0.1
RM20090703897			36			41.6			0.1
	0.034	3.4		0.06	6.4		0	0
RM20090705723			39.3			48			0.2
	0.011	1.1		0.02	2.2		0	0
OMM1749			40.5			50.2			0.2
	0.004	0.4		0.01	0.7		0	0
RM20090705709			40.9			50.9			0.2
	0.004	0.4		0.01	0.7		0	0
RM20090702974			41.2			51.7			0.3
	0.006	0.6		0.01	1.1		0	0
RM20090704453			41.8			52.7			0.3
	0.006	0.6		0.01	1.1		0	0
RM20090701956			42.3			53.8			0.4
	0.004	0.4		0.01	0.7		0	0
RM20090701652			42.7			54.6			0.4
	0.022	2.2		0.04	4.2		0	0.2
RM20090706646			44.9			58.8			0.6
	0.03	3		0.06	5.9		0	0.2
RM20090702860			47.9			64.6			0.9
	0.007	0.7		0.01	0.8		0	0.5
RM20090705368			48.6			65.4			1.3
	0.007	0.7		0.01	0.9		0	0.3
RM20090701141			49.3			66.3			1.6
	0.007	0.7		0.01	1.5		0	0
OMY1225UW			50			67.8			1.6
	0.004	0.4		0.01	0.8		0	0.1
RM20090705475			50.4			68.5			1.7
	0.015	1.5		0.03	2.6		0	0.1
RM20090701465			51.8			71.1			1.8
	0.015	1.5		0.03	2.6		0	0.1
RM20090700171			53.3			73.8			1.9
	0.019	1.9		0.04	4.1		0	0.1
RM20090701608			55.2			77.8			2
	0.028	2.8		0.06	5.7		0	0.2
RM20090701254			58			83.5			2.2
	0.021	2.1		0.04	4.5		0	0.2
RM20090704159			60.1			88			2.5
	0.014	1.4		0.03	3.4		0	0
RM20090703133			61.5			91.4			2.5
	0.018	1.8		0.03	3.4		0	0
OMM1753			63.3			94.8			2.5
	0.014	1.4		0.01	1.4		0	0
RM20090703487			64.7			96.2			2.5
	0.091	9.2		0.09	9.2		0	0
RM20090703181			73.9			105.4			2.5
	0.046	4.7		0.05	4.7		0	0
RM20090704359			78.6			110.1			2.5
	0.039	3.9		0.04	3.9		0	0
RM20090705865			82.5			113.9			2.5
	0.063	6.4		0.06	6.4		0	0
RM20090706653			88.8			120.3			2.5
	0.028	2.8		0.03	2.8		0	0
RM20090703818			91.7			123.1			2.5
	0.042	4.2		0.04	4.2		0	0
RM20090701456			95.9			127.4			2.5
	0.031	3.2		0.03	3.1		0	0
RM20090701232			99.1			130.5			2.5
	0.039	3.9		0.04	3.9		0	0
RM20090705733			103			134.5			2.5
	0.028	2.8		0.03	2.8		0	0
OMY1002UW			105.8			137.3			2.5
	0.012	1.2		0.01	1.2		0	0
OMM1214			107.1			138.5			2.5
	0.004	0.4		0	0.4		0	0
RM20090704590			107.5			138.9			2.5
	0.005	0.5		0.01	0.5		0	0
OMM1465			108			139.4			2.5
	0.014	1.4		0.01	1.4		0	0
RM20090701486			109.4			140.9			2.5
	0.036	3.6		0.04	3.6		0	0
RM20090704806			113			144.5			2.5
	0.055	5.5		0.05	5.5		0	0
RM20090706713			118.5			150			2.5
	0.113	11.5		0.11	11.5		0	0
RM20090701867			130			161.4			2.5
There are 49 mar	kers in	unique	map po	sitions.

## Sheet: Omy7
Current map :
	Sex averaged map:			Sex specific maps:
	Theta	Kosambi	cM	Theta Female	Kosambi	cM	Theta Male	Kosambi	cM
RM20090703805			0			0			0
	0.23	24.9		0.23	24.5		0.15	15.1
RM20090706209			24.9			24.5			15.1
	0.036	3.6		0.04	3.7		0.15	15.1
RM20090706529			28.5			28.3			30.2
	0.014	1.4		0.03	2.7		0	0.4
RM20090700759			29.9			30.9			30.6
	0.04	4		0.07	6.9		0	0.4
OMM1513			33.9			37.9			31
	0.023	2.3		0.03	3		0	0.4
RM20090704029			36.3			40.9			31.3
	0.013	1.3		0.02	1.7		0	0.4
OMM5233			37.5			42.6			31.7
	0.02	2		0.04	4		0	0
OMM1158			39.5			46.6			31.7
	0.041	4.1		0.07	7.5		0.01	0.8
RM20090703060			43.6			54.1			32.5
	0.044	4.4		0.09	8.8		0	0.3
RM20090700298			48			63			32.8
	0.031	3.1		0.06	6.1		0	0.3
RM20090700680			51.1			69.1			33.1
	0.013	1.3		0.02	2.5		0	0.3
OMM1236			52.3			71.6			33.3
	0.009	0.9		0.01	1.3		0	0.4
RM20090702856			53.3			72.9			33.7
	0.022	2.2		0.04	4.4		0	0.2
RM20090700328			55.5			77.3			33.9
	0.022	2.2		0.04	4.3		0	0.2
OMM1030			57.6			81.6			34.1
	0.005	0.5		0.01	0.9		0	0
RM20090701885			58.1			82.5			34.1
	0.012	1.2		0.02	2.4		0	0
RM20090701504			59.3			84.9			34.1
	0.024	2.4		0.05	4.8		0	0
RM20090704880			61.7			89.8			34.1
	0.024	2.4		0.05	4.8		0	0
RM20090705920			64.1			94.6			34.1
	0.008	0.8		0.02	1.6		0	0
RM20090704280			64.9			96.2			34.1
	0.008	0.8		0.02	1.6		0	0
OMM1277			65.7			97.8			34.1
	0.007	0.7		0.01	1.3		0	0
RM20090705092			66.4			99.1			34.1
	0.003	0.3		0.01	0.7		0	0
OMM5255			66.7			99.8			34.1
	0.018	1.8		0.04	3.7		0	0
RM20090705152			68.5			103.5			34.1
	0.017	1.7		0.03	3.5		0	0
RM20090701765			70.2			107			34.1
	0.008	0.8		0.02	1.6		0	0
RM20090701631			71			108.6			34.1
	0.01	1		0.02	2		0	0
RM20090705787			72			110.6			34.1
	0.01	1		0.02	2		0	0
RM20090701438			72.9			112.6			34.1
	0.003	0.3		0.01	0.7		0	0
RM20090705402			73.3			113.3			34.1
	0.003	0.3		0.01	0.7		0	0
RM20090704625			73.6			114			34.1
	0.01	1		0.02	2		0	0
RM20090706810			74.6			116			34.1
	0.02	2		0.04	4		0	0
RM20090702616			76.6			120			34.1
	0.013	1.3		0.03	2.7		0	0
RM20090700480			77.9			122.7			34.1
	0.007	0.7		0.01	1.4		0	0
RM20090700905			78.5			124.1			34.1
	0.003	0.3		0.01	0.7		0	0
RM20090703191			78.9			124.8			34.1
	0.007	0.7		0.01	1.4		0	0
RM20090704889			79.5			126.1			34.1
	0.016	1.6		0.03	3.4		0	0
OMM3056			81.2			129.5			34.1
	0.023	2.3		0.04	4.1		0	0.2
RM20090700996			83.5			133.5			34.3
	0.034	3.4		0.06	5.9		0	0.2
RM20090704722			86.9			139.4			34.5
	0.013	1.3		0.02	2.2		0	0.2
RM20090703022			88.2			141.7			34.7
	0.012	1.2		0.02	2		0	0.2
RM20090706820			89.3			143.7			34.9
	0.016	1.6		0.03	2.7		0	0.2
OMM1557			90.9			146.4			35.1
	0.004	0.4		0.01	0.6		0	0.2
RM20090700584			91.3			147			35.3
	0.007	0.7		0.01	1.2		0	0.2
RM20090703168			92			148.3			35.5
	0.017	1.7		0.03	2.8		0	0.2
RM20090701195			93.6			151.1			35.7
	0.018	1.8		0.03	3		0	0.2
RM20090705108			95.5			154.1			35.9
	0.018	1.8		0.04	4.3		0	0.2
RM20090701695			97.3			158.5			36.1
	0.019	1.9		0.04	3.6		0	0.4
RM20090700891			99.2			162.1			36.5
	0.009	0.9		0.01	1.2		0	0.4
RM20090705614			100.1			163.3			36.9
	0.004	0.4		0.01	0.6		0	0.4
OMM1381			100.5			164			37.3
	0.015	1.5		0.02	2.2		0	0.4
RM20090701568			102			166.1			37.7
	0.018	1.8		0.03	2.6		0	0.4
RM20090702810			103.9			168.8			38.1
	0.01	1		0.02	1.7		0	0.1
OMM1662			104.8			170.5			38.3
	0.005	0.5		0.01	0.8		0	0.1
RM20090702783			105.3			171.4			38.4
	0.003	0.3		0	0.5		0	0.1
OMM1056			105.6			171.8			38.5
	0.034	3.4		0.05	5.2		0.02	1.6
OMM1234			109			177			40.1
	0.043	4.3		0	0		0.05	5.3
OMM1740			113.3			177			45.4
	0.119	12.1		0	0		0.23	25
RM20090700151			125.4			177			70.4
	0.034	3.4		0	0		0.07	6.7
RM20090703771			128.8			177			77.1
	0.108	11		0.02	1.6		0.19	20.2
RM20090700643			139.8			178.6			97.3
	0.09	9.1		0.01	1		0.16	17.1
RM20090701238			148.9			179.6			114.4
There are 61 mar	kers i	n unique	map po	sitions	.

[truncated: 22 more sheets: Omy8, Omy9, Omy10, Omy11, Omy12, Omy13, Omy14, Omy15, Omy16, Omy17, Omy18, Omy19, Omy20, Omy21, Omy22, Omy23, Omy24, Omy25, Omy26, Omy27 …]
