# Supplementary material for: Detection and Validation of QTL Affecting Bacterial Cold Water Disease Resistance in Rainbow Trout Using Restriction-Site Associated DNA Sequencing
Source: PLoS One. 2015 Sep 16;10(9):e0138435. doi: 10.1371/journal.pone.0138435 (PMC4574402; doi:10.1371/journal.pone.0138435)
Supplement: S1 Table — (XLSX) [file pone.0138435.s004.xlsx]

## Sheet: Sheet1
Omy	Marker	Scaffold	ORF Seq ID	Description	GO Annotation
1	RM20090701492	scaffold_36	GSONMT00077517001	vitamin k epoxide reductase complex subunit 1-like protein 1	P:metabolic process; C:cell; F:catalytic activity
			GSONMT00077519001	transmembrane protease serine 9-like	F:peptidase activity
			GSONMT00077490001	prolyl 4-hydroxylase subunit alpha-1-like	P:metabolic process; C:mitochondrion; F:catalytic activity; F:binding; P:cellular protein modification process; P:cellular amino acid metabolic process; P:cellular component organization; C:endoplasmic reticulum
			GSONMT00077459001	mucolipin-1-like	C:lysosome; C:endosome
			GSONMT00077479001	nuclear factor interleukin-3-regulated	F:DNA binding; F:sequence-specific DNA binding transcription factor activity; P:regulation of biological process; P:transcription
			GSONMT00077443001	transcription factor jun-b-like	P:response to external stimulus; P:anatomical structure morphogenesis; P:response to stress; P:multicellular organismal development; P:growth; P:regulation of biological process; P:transcription
			GSONMT00077528001	carbohydrate sulfotransferase 15-like	F:transferase activity
			GSONMT00077498001	sparc-like protein 1-like	P:multicellular organismal development; C:extracellular region
			GSONMT00077472001	choline transporter-like protein 2-like isoform x2	C:cell; P:transport
			GSONMT00077461001	n-acetylmuramoyl-l-alanine amidase-like	F:hydrolase activity; P:carbohydrate metabolic process; P:catabolic process; F:binding
			GSONMT00077467001	phenylalanine--trna ligase alpha subunit-like	P:nucleobase-containing compound metabolic process; P:translation; P:cellular amino acid metabolic process; F:nucleotide binding; F:catalytic activity; F:RNA binding; C:cytoplasm
			GSONMT00077451001	solute carrier family 25 member 38-a-like	P:protein metabolic process; C:mitochondrion; P:cell differentiation; P:multicellular organismal development; P:transport; C:cell
			GSONMT00077466001	interleukin enhancer-binding factor 3 homolog isoform x1	F:nucleic acid binding
			GSONMT00077465001	interleukin enhancer-binding factor 3 homolog isoform x3	P:regulation of biological process; P:transcription
6	RM20091960212	scaffold_607	GSONMT00038195001	c9orf85 homolog	F:molecular_function; P:biological_process; C:cellular_component
			GSONMT00038191001	an1-type zinc finger protein 5-like isoform x2	F:binding; F:DNA binding
			GSONMT00038187001	annexin a1	P:response to external stimulus; P:response to stress; P:transport; P:regulation of biological process; P:organelle organization; C:organelle; C:extracellular region; F:protein binding; P:biological_process; P:response to abiotic stimulus; P:response to endogenous stimulus; F:structural molecule activity; C:protein complex; P:biosynthetic process; P:lipid metabolic process; F:receptor binding; P:…
			GSONMT00038194001	guanine deaminase	C:cytosol; P:transport; P:nucleobase-containing compound metabolic process; P:catabolic process; F:binding; F:hydrolase activity; P:biosynthetic process; C:mitochondrion; P:multicellular organismal development; P:cellular amino acid metabolic process; F:transporter activity
			GSONMT00038184001	toll-like receptor 20	P:response to stress; P:response to biotic stimulus; P:signal transduction; F:receptor activity; P:regulation of biological process; P:protein transport; P:biological_process; F:binding; C:protein complex; C:cell
			GSONMT00038199001	transmembrane protein 2-like	P:anatomical structure morphogenesis; P:embryo development; P:multicellular organismal development; C:cell
7 QTL-1	RM20090702856	scaffold_446	GSONMT00030327001	e3 ubiquitin-protein ligase march7-like isoform x2	F:binding
			GSONMT00030315001	four and a half lim domains protein 2-like	P:anatomical structure morphogenesis; P:multicellular organismal development; P:response to endogenous stimulus; F:binding; P:cell differentiation; F:protein binding; P:regulation of biological process; P:transcription
			GSONMT00030329001	lymphocyte antigen 75	F:carbohydrate binding
			GSONMT00030310001	esophageal cancer-related gene 4 protein precursor	P:multicellular organismal development; P:regulation of biological process; P:cell proliferation; P:biological_process; C:extracellular region; C:cytoplasmic membrane-bounded vesicle
			GSONMT00030334001	integrin beta-6 isoform x1	F:receptor activity; P:biological_process; F:carbohydrate binding; P:signal transduction; P:multicellular organismal development; C:protein complex; C:plasma membrane
			GSONMT00030331001	secretory phospholipase a2 receptor-like	P:signal transduction; P:response to stress; F:protein binding; F:receptor activity; C:cell; P:transport; P:cellular component organization; F:carbohydrate binding; C:plasma membrane; P:biological_process
7 QTL-1	RM20090700328	scaffold_318	GSONMT00029049001	signal transducer and activator of transcription 1-alpha beta-like isoform x2	F:calcium ion binding; F:signal transducer activity; P:transcription
			GSONMT00029060001	ngfi-a-binding protein 1-like	P:regulation of biological process; P:transcription
8 GWAS	RM20090703355	scaffold_886	GSONMT00049457001	sestrin-1-like isoform x2	C:nucleus; P:cell cycle; P:multicellular organismal development
			GSONMT00049456001	sestrin-1-like isoform x1	C:nucleus; P:cell cycle; P:multicellular organismal development
			GSONMT00049460001	sialomucin core protein 24-like	C:endosome; P:biological_process; C:plasma membrane; C:lysosome; P:protein metabolic process; F:catalytic activity
			GSONMT00049450001	sorting nexin 3	P:regulation of biological process; P:protein metabolic process; C:cytosol; P:biosynthetic process; F:lipid binding; P:cell differentiation; P:multicellular organismal development; C:endosome; F:protein binding; P:ion transport; P:protein transport; P:transport; P:cellular component organization; P:cell communication
8 GWAS	RM20090703790	scaffold_262	GSONMT00074742001	syntaxin-binding protein 6	C:cell; P:transport
			GSONMT00074756001	bifunctional lysine-specific demethylase and histidyl-hydroxylase no66	P:metabolic process; F:catalytic activity; P:organelle organization; P:cellular protein modification process; C:nucleolus; P:cell differentiation; P:regulation of biological process; P:multicellular organismal development; C:nucleoplasm; F:transferase activity; P:transcription
			GSONMT00074745001	proteasome ( macropain) 26s 6	C:intracellular; C:protein complex; P:metabolic process; P:cell cycle; F:peptidase activity; P:cell death; P:biological_process; P:signal transduction; P:response to stress; C:nucleoplasm; P:nucleobase-containing compound metabolic process; P:catabolic process; P:protein metabolic process; C:cytosol; C:plasma membrane; P:viral process; P:regulation of biological process; P:cellular amino acid met…
			GSONMT00074731001	b2 bradykinin receptor-like	F:receptor activity; F:protein binding; P:signal transduction; P:biological_process; C:cell; P:response to stress
			GSONMT00074746001	zinc finger protein c3h1 type-like 1	F:metal ion binding; P:biological_process; C:cellular_component
8 GWAS	RM20090701338	scaffold_172	GSONMT00069043001	protein unc-93 homolog a-like	C:cell
			GSONMT00069047001	hydroxycarboxylic acid receptor 2-like	C:cell; P:signal transduction; F:receptor activity
			GSONMT00069084001	beta-taxilin isoform x1	F:protein binding
			GSONMT00069046001	hydroxycarboxylic acid receptor 2-like	C:cell; P:signal transduction; F:receptor activity
			GSONMT00069078001	clusterin precursor	P:cell death
			GSONMT00069052001	cation-independent mannose-6-phosphate receptor	C:cell; F:protein binding; P:transport; C:organelle; C:intracellular; C:cytoplasm; F:transporter activity
			GSONMT00069050001	solute carrier family 22 member 2-like	C:cell; F:transporter activity; P:ion transport
			GSONMT00069082001	headcase protein homolog	-
			GSONMT00069054001	c-type lectin domain family 11 member a-like	C:intracellular; F:carbohydrate binding
			GSONMT00069061001	e3 ubiquitin-protein ligase trim9	C:plasma membrane; P:protein metabolic process; P:catabolic process; F:binding; C:cytoskeleton; C:cell; C:cytoplasmic membrane-bounded vesicle; F:catalytic activity; P:cellular protein modification process; F:protein binding
			GSONMT00069069001	scavenger receptor class a member 5	F:receptor activity; P:cellular component organization; P:ion transport; P:cellular homeostasis; C:plasma membrane; P:transport
			GSONMT00069077001	scavenger receptor class a member 3-like	-
			GSONMT00069093001	dna-directed rna polymerase iii subunit rpc4	F:transferase activity; P:response to stress; P:regulation of biological process; P:transcription
8 GWAS	RM20090700278	scaffold_45489	GSONMT00058675001	adenylate cyclase type 1-like	P:anatomical structure morphogenesis; P:cellular component organization; P:cell differentiation; P:multicellular organismal development; P:cell recognition; P:transport; P:signal transduction; P:nucleobase-containing compound metabolic process; P:biosynthetic process; F:catalytic activity; P:biological_process; P:generation of precursor metabolites and energy; P:metabolic process; P:regulation of…
8 QTL-1	RM20090700197	scaffold_4	GSONMT00077865001	profilin-2-like isoform x2	P:regulation of biological process; P:cytoskeleton organization; C:cell; F:actin binding; C:cytoskeleton; C:cytoplasm
			GSONMT00077916001	unconventional myosin-viib	C:cytoskeleton; F:nucleotide binding
			GSONMT00077901001	vesicle-trafficking protein sec22b-like	C:Golgi apparatus; C:endoplasmic reticulum; F:protein binding; P:transport; P:organelle organization; C:organelle; C:cytoplasm; C:cell; C:protein complex; P:protein transport
			GSONMT00077902001	u3 small nucleolar ribonucleoprotein protein imp3	C:cellular_component; C:intracellular; F:RNA binding
			GSONMT00077926001	serine--pyruvate mitochondrial-like	P:biosynthetic process; P:metabolic process; C:peroxisome; C:mitochondrion; P:organelle organization; P:protein transport; F:transferase activity; P:response to endogenous stimulus; F:binding
			GSONMT00077832001	phosphoglucomutase-1 isoform x1	P:carbohydrate metabolic process; C:cytoskeleton; F:binding; F:catalytic activity
			GSONMT00077864001	---NA---	-
			GSONMT00077851001	regulator of g-protein signaling 18-like	P:multicellular organismal development; P:cell differentiation; P:biological_process; F:enzyme regulator activity; C:cytoplasm; C:plasma membrane
			GSONMT00077889001	y+l amino acid transporter 2-like	C:cell; F:transporter activity; P:transport
			GSONMT00077787001	maguk p55 subfamily member 7	C:nucleus; C:protein complex; C:nucleoplasm; F:protein binding; P:transcription
			GSONMT00077840001	camp-specific 3 -cyclic phosphodiesterase 4b isoform x3	P:behavior; P:response to external stimulus; P:nucleobase-containing compound metabolic process; P:catabolic process; P:biological_process; P:regulation of biological process; C:cytosol; F:nucleotide binding; F:binding; P:signal transduction; C:cytoplasm; P:response to biotic stimulus; C:protein complex; C:plasma membrane; C:nucleus; F:hydrolase activity
			GSONMT00077769001	glycine n-acyltransferase	F:transferase activity
			GSONMT00077849001	regulator of g-protein signaling 5-like	C:cytoplasm; F:enzyme regulator activity; P:biological_process; C:plasma membrane
			GSONMT00077908001	b-cell lymphoma 6 protein homolog	F:binding; P:anatomical structure morphogenesis; P:multicellular organismal development; F:nucleic acid binding; C:nucleus
			GSONMT00077886001	eukaryotic initiation factor 4a-ii	F:translation factor activity
			GSONMT00077831001	angiopoietin-related protein 3	-
			GSONMT00077918001	angiomotin-like 2a-like	P:biological_process; P:anatomical structure morphogenesis; P:multicellular organismal development; P:embryo development; P:cellular component organization; C:cytoplasm; P:cytoskeleton organization; F:protein binding; P:cell proliferation
			GSONMT00077869001	uap56-interacting factor-like	F:RNA binding; P:transport; C:nucleoplasm
			GSONMT00077835001	tyrosine-protein kinase jak1	C:organelle; C:intracellular; P:cellular protein modification process; P:biological_process; F:protein kinase activity; P:cell differentiation; P:multicellular organismal development; F:nucleotide binding
			GSONMT00077822001	apolipoprotein d-like	P:regulation of biological process; P:response to stress; C:extracellular region; P:protein metabolic process; P:lipid metabolic process; P:primary metabolic process; F:lipid binding; C:organelle; C:intracellular; C:cytoplasm
			GSONMT00077873001	apoptosis-associated speck-like protein containing a card	F:protein binding; C:intracellular; P:regulation of biological process; P:cell death
			GSONMT00077772001	mad2l1-binding protein	C:nucleus; P:regulation of biological process; P:cell cycle
			GSONMT00077798001	abl interactor 1 isoform 7	F:enzyme regulator activity; C:cell; P:cytoskeleton organization; P:biological_process; P:embryo development; C:cytosol; P:regulation of biological process; P:cell proliferation; F:cytoskeletal protein binding; P:signal transduction; C:cytoskeleton; P:cellular protein modification process; C:plasma membrane; C:endoplasmic reticulum; P:response to stress; C:nucleus; C:cellular_component
			GSONMT00077890001	receptor-interacting serine threonine-protein kinase 2	P:regulation of biological process; P:cell death; C:cytoskeleton; P:cellular protein modification process; F:protein kinase activity; F:protein binding; P:response to stress; P:response to biotic stimulus; P:signal transduction; P:biological_process; C:organelle; C:protein complex; C:cytoplasm; P:cell proliferation; P:transcription
			GSONMT00077876001	protein nlrc3-like	F:binding
			GSONMT00077920001	autoimmune regulator-like	P:regulation of biological process; P:primary metabolic process; F:binding; P:metabolic process; C:intracellular
			GSONMT00077877001	lrr and pyd domains-containing protein 3-like	F:nucleotide binding
			GSONMT00077847001	3-keto-steroid reductase-like	P:metabolic process; F:catalytic activity
8 QTL-2	RM20090701162	scaffold_1339	GSONMT00015043001	protein fam111a-like	P:proteolysis; F:serine-type peptidase activity; F:catalytic activity; P:metabolic process
8 QTL-2	RM20090700382	scaffold_246	GSONMT00073683001	carbonic anhydrase	C:cytoplasm; P:transport; P:metabolic process; P:response to stress; P:response to abiotic stimulus; F:catalytic activity; F:binding
			GSONMT00073702001	junctophilin-1-like	F:molecular_function; P:biological_process; C:cellular_component
			GSONMT00073665001	e3 ubiquitin-protein ligase rnf31-like	F:metal ion binding; C:LUBAC complex; F:zinc ion binding; P:protein ubiquitination; F:ubiquitin-protein ligase activity; C:intracellular
			GSONMT00073703001	peptidase inhibitor 15	C:extracellular region
			GSONMT00073700001	transmembrane protein mitochondrial-like	C:cell
			GSONMT00073706001	suppressor of cytokine signaling 6	P:regulation of biological process; P:cellular protein modification process; P:protein metabolic process; P:catabolic process; C:plasma membrane; P:growth
11 QTL	RM20090703064	scaffold_1831	N/A	N/A	N/A
11 QTL	RM20090703983	scaffold_1381	GSONMT00057236001	lipocalin precursor	C:extracellular region; F:lipid binding; F:catalytic activity; P:transport; F:transporter activity; P:lipid metabolic process
			GSONMT00057235001	complement component c8 gamma chain precursor	C:extracellular region
			GSONMT00057234001	methionine-r-sulfoxide reductase mitochondrial-like	F:catalytic activity; F:binding; P:response to stress; F:actin binding; C:mitochondrion; P:protein metabolic process; P:metabolic process; P:cytoskeleton organization
11 GWAS	RM20090700457	scaffold_237	GSONMT00073143001	neutrophil cytosol factor 2-like	P:biological_process
			GSONMT00073153001	translocon-associated protein subunit alpha-like isoform x3	C:endoplasmic reticulum; P:response to endogenous stimulus
			GSONMT00073145001	dna-dependent protein kinase catalytic subunit	C:intracellular; C:protein complex; P:response to stress; P:DNA metabolic process; F:DNA binding; F:nucleotide binding; F:protein kinase activity; P:metabolic process; C:nucleoplasm
			GSONMT00073160001	5-oxoprolinase isoform x1	P:metabolic process; F:hydrolase activity
12	OMM5152	scaffold_79937	GSONMT00064802001	dual specificity mitogen-activated protein kinase kinase 4-like	P:multicellular organismal development; P:anatomical structure morphogenesis; P:embryo development; P:cellular protein modification process; F:nucleotide binding; F:protein kinase activity
			GSONMT00064809001	recoverin	P:regulation of biological process; P:ion transport; P:response to external stimulus; P:signal transduction; P:response to abiotic stimulus; F:calcium ion binding; P:biological_process
12	RM20091962540	scaffold_7717	N/A	N/A	N/A
14	RM20090701114	scaffold_469	GSONMT00017181001	tyrosine-protein kinase btk	C:cytosol; F:lipid binding; P:cellular protein modification process; P:multicellular organismal development; P:signal transduction; F:protein binding; C:organelle; C:cytoplasm; F:protein kinase activity; F:nucleotide binding; C:cell; P:cell differentiation; C:nucleus; C:plasma membrane
			GSONMT00017180001	60s ribosomal protein l36a	P:translation; P:reproduction; P:viral process; P:transcription
			GSONMT00017186001	mediator of rna polymerase ii transcription subunit 12-like	P:multicellular organismal development; P:transcription
25	RM20090706025	scaffold_913	GSONMT00031749001	glutaminyl-peptide cyclotransferase-like	P:protein metabolic process; P:catabolic process; F:transferase activity; F:peptidase activity
			GSONMT00031747001	connector enhancer of kinase suppressor of ras 3	P:signal transduction; C:cytoplasm; C:cell
