# Supplementary material for: Detection and Validation of QTL Affecting Bacterial Cold Water Disease Resistance in Rainbow Trout Using Restriction-Site Associated DNA Sequencing
Source: PLoS One. 2015 Sep 16;10(9):e0138435. doi: 10.1371/journal.pone.0138435 (PMC4574402; doi:10.1371/journal.pone.0138435)
Supplement: S2 File — (XLSX) [file pone.0138435.s002.xlsx]

## Sheet: 1) Map Summary
Omy	No. of Markers	No. of SNPs	No. of Microsatellites	Map Length (cM)	Average Resolution (cM)	No. of Markers by 2-point
1	67	60	7	174	2.59701	235
2	49	43	6	193	3.93878	235
3	54	46	8	140	2.59259	214
4	55	47	8	149	2.70909	220
5	70	60	10	202	2.88571	219
6	47	35	12	148	3.14894	203
7	63	52	11	166	2.63492	222
8	61	52	9	155	2.54098	244
9	48	37	11	119	2.47917	173
10	59	46	13	130	2.20339	196
11	48	42	6	183	3.8125	230
12	58	48	10	140	2.41379	224
13	44	37	7	141	3.20455	134
14	47	38	9	154	3.2766	179
15	44	36	8	146	3.31818	179
16	55	49	6	164	2.98182	209
17	67	52	15	160	2.38806	202
18	47	40	7	157	3.34043	160
19	53	47	6	159	3	190
20	30	24	6	101	3.36667	126
21	53	45	8	136	2.56604	139
22	34	28	6	117	3.44118	128
23	24	21	3	88	3.66667	124
24	25	19	6	75	3	142
25	45	38	7	135	3	247
26	14	10	4	65	4.64286	64
27	36	29	7	90	2.5	149
28	25	21	4	93	3.72	102
29 (SEX)	26	22	4	81	3.11538	113
Total	1348	1124	224	3961	88.4853	5202
Average	46.4828	38.7586	7.72414	136.586	3.05122	179.379
Min	14	10	3	65	2.20339	64
Max	70	60	15	202	4.64286	247

## Sheet: 2) LG2_2-Point
Chr1	Chr2	Chr3	Chr4	Chr5	Chr6	Chr7	Chr8	Chr9	Chr10	Chr11	Chr12	Chr13	Chr14	Chr15	Chr16	Chr17	Chr18	Chr19	Chr20	Chr21	Chr22	Chr23	Chr24	Chr25	Chr26	Chr27	Chr28	Chr29
OMM1776	OMM5198	OMM5324	OMY4DIAS	OMM5213	OMY1225UW	OMM1277	OMM1459	OMYFGT2TUF	OMM5312	OMM1661B	OMY105INRA	OMY1212UW	OMM5153	OMM1578A	OMYOGT4TUF	OMM5116	OMM1303	OMM5327	OMM1076	OMM1729	OMM1625	OMM5305	OMM5217	SSA0035	OMM1460	OMY7IIDIASB	OMM3022	OMM1772
OMM1610A	RM20091960304	OMM1391A	RM20091960280	RM20091960093	OMM1661A	RM20091963170	RM20091960131	OMM1060	OMM1332	RM20091960182	RM20091960001	OMM5074B	OMM3044	RM20091960009	RM20091960109	RM20091960409	RM20091960055	OMM1134A	RM20091960990	RM20091960038	RM20091960150	RM20091960805	RM20091960988	RM20091963066	RM20091960015	OMM1310	BX870052B	RM20091960200
OMM5288	RM20091960621	RM20091960121	RM20091960362	RM20091960099	RM20091961375	RM20091963400	RM20091960162	OMM5179	OMM3102	RM20091960277	RM20091960106	RM20091960288	RM20091962508	RM20091960351	RM20091960152	RM20091960773	RM20091960493	RM20091960292	RM20091961075	RM20091961751	RM20091960619	RM20091961031	RM20091961112	RM20091960691	RM20091961248	RM20091960439	RM20091960006	RM20091960268
RM20091960650	RM20091960692	RM20091960132	RM20091960429	RM20091960330	RM20091960083	OMM3056	RM20091960285	RM20091961189	RM20091960951	RM20091960516	RM20091961403	RM20091960506	RM20091963391	RM20091961261	RM20091960301	RM20091960823	RM20091960607	RM20091960663	RM20091961144	RM20091961844	RM20091960843	RM20091961183	RM20091961123	RM20091961300	RM20091962295	RM20091960808	RM20091960332	RM20091960873
RM20091960734	RM20091961303	RM20091960574	RM20091960538	RM20091960612	RM20091960583	RM20091960027	RM20091960289	RM20091961456	RM20091961020	RM20091960889	RM20091961554	RM20091960698	RM20091965429	RM20091961936	RM20091960620	RM20091961252	RM20091961567	RM20091960711	RM20091961458	RM20091962896	RM20091960864	RM20091961777	RM20091961217	RM20091961595	RM20091962543	RM20091960989	RM20091960412	RM20091961105
RM20091960747	RM20091961671	RM20091960625	RM20091960724	RM20091960822	RM20091960707	RM20091960392	RM20091960427	RM20091961698	RM20091961203	RM20091960998	RM20091961589	RM20091960968	RM20091960342	RM20091962283	RM20091961014	RM20091962604	RM20091961792	RM20091961273	RM20091963284	RM20091963190	RM20091960996	RM20091961952	RM20091961348	RM20091962049	RM20091962728	RM20091961160	RM20091960740	RM20091961260
RM20091960775	RM20091961835	RM20091960628	RM20091961218	RM20091960828	RM20091960981	RM20091960431	RM20091960432	RM20091961913	RM20091961224	RM20091961320	RM20091962288	RM20091961195	RM20091960420	RM20091962413	RM20091961154	RM20091962907	RM20091962169	RM20091961631	RM20091963485	RM20091963517	RM20091961364	RM20091962048	RM20091961438	RM20091962228	RM20091963821	RM20091961176	RM20091961130	RM20091961475
RM20091960881	RM20091962269	RM20091960759	RM20091961228	RM20091961436	RM20091961780	RM20091960571	RM20091960456	RM20091962285	RM20091961566	RM20091961894	RM20091962384	RM20091961405	RM20091960462	RM20091962671	RM20091961182	RM20091963269	RM20091962423	RM20091961716	RM20091963518	RM20091963619	RM20091961428	RM20091962118	RM20091962029	RM20091962582	RM20091963895	RM20091961262	RM20091961138	RM20091961866
RM20091961110	RM20091962915	RM20091961048	RM20091961367	RM20091961626	RM20091961857	RM20091960799	RM20091960488	RM20091962920	RM20091962363	RM20091962327	RM20091962418	RM20091962531	RM20091960652	RM20091963023	RM20091961298	RM20091963466	RM20091962429	RM20091961737	RM20091963528	RM20091964941	RM20091961850	RM20091962183	RM20091962074	RM20091964581	OMM1159	RM20091961477	RM20091961197	RM20091962091
RM20091961209	RM20091963111	RM20091961742	RM20091961587	RM20091962618	RM20091962887	RM20091960916	RM20091960491	RM20091964159	RM20091962745	RM20091962440	RM20091962428	RM20091962605	RM20091961125	RM20091963123	RM20091961335	RM20091963586	RM20091962457	RM20091961910	RM20091963546	RM20091965043	RM20091962945	RM20091962306	RM20091962133	RM20091960049	RM20091960025	RM20091963430	RM20091961509	RM20091963698
RM20091961442	RM20091963248	RM20091961785	RM20091961766	RM20091962644	RM20091963245	RM20091960961	RM20091960521	RM20091964517	RM20091962800	RM20091962677	RM20091963674	RM20091964437	RM20091961279	RM20091963151	RM20091961619	RM20091964700	RM20091962795	RM20091962222	RM20091963590	RM20091960033	RM20091963096	RM20091963121	RM20091962187	RM20091960281	RM20091960933	RM20091963570	RM20091961538	RM20091963843
RM20091961523	RM20091963326	RM20091962599	RM20091961798	RM20091963125	RM20091963434	RM20091961099	RM20091960566	BX863758	RM20091963077	RM20091963083	RM20091963891	RM20091964471	RM20091961324	RM20091963216	RM20091961793	RM20091964718	RM20091962965	RM20091963149	RM20091963921	RM20091960036	RM20091963429	RM20091963174	RM20091962742	RM20091962281	RM20091961899	RM20091963671	RM20091961650	RM20091964776
RM20091961730	RM20091963379	RM20091962756	RM20091962212	RM20091963622	RM20091964085	RM20091961331	RM20091960659	RM20091960018	RM20091963533	RM20091963424	RM20091964007	RM20091964557	RM20091961579	RM20091963303	RM20091961895	RM20091965028	RM20091962966	RM20091963380	RM20091964117	RM20091960076	RM20091964404	RM20091963431	RM20091962897	RM20091962584	RM20091961944	RM20091964446	RM20091961743	RM20091964876
RM20091961958	RM20091963537	RM20091962840	RM20091962272	RM20091963704	RM20091964120	RM20091961374	RM20091960736	RM20091960103	RM20091963576	RM20091963505	RM20091964836	RM20091964857	RM20091962009	RM20091963548	RM20091962292	RM20091965083	RM20091963075	RM20091963521	RM20091964709	RM20091960446	RM20091964412	RM20091965196	RM20091962994	RM20091964992	RM20091962000	RM20091964578	RM20091962753	RM20091965561
RM20091962157	RM20091963815	RM20091962948	RM20091962385	RM20091963853	RM20091964199	RM20091961398	RM20091960781	RM20091960260	RM20091963613	RM20091963703	RM20091965037	RM20091964890	RM20091962054	RM20091963646	RM20091962770	RM20091965491	RM20091963935	RM20091963608	RM20091965128	RM20091960637	RM20091965143	RM20091965847	RM20091963175	OMM1054	RM20091962025	RM20091964953	RM20091962843	OMM1405
RM20091962268	RM20091963998	RM20091963076	RM20091962944	RM20091964077	RM20091964781	RM20091961555	RM20091960991	RM20091960321	RM20091963751	RM20091963888	RM20091965139	RM20091965411	RM20091962275	RM20091964091	RM20091962777	OMM1330B	RM20091963965	RM20091964275	OMM5044	RM20091960858	RM20091965447	RM20091965940	RM20091963238	RM20091960789	RM20091962371	RM20091965045	RM20091962950	RM20091960295
RM20091962458	RM20091964033	RM20091963556	RM20091962967	RM20091964114	RM20091965060	RM20091961559	RM20091961032	RM20091960335	RM20091964286	RM20091964250	RM20091965398	RM20091965931	RM20091963508	RM20091964101	RM20091962828	RM20091960840	RM20091964431	RM20091964694	RM20091960406	RM20091961064	RM20091965537	RM20091960037	RM20091963738	RM20091965067	RM20091962436	RM20091965901	RM20091963611	RM20091960371
RM20091962695	RM20091964180	RM20091963869	RM20091963001	RM20091964220	RM20091965133	RM20091961740	RM20091961045	RM20091960565	RM20091964727	RM20091964311	RM20091965427	RM20091960667	RM20091963730	RM20091964160	RM20091962869	RM20091963172	RM20091964662	RM20091964794	RM20091960481	RM20091961297	RM20091965725	RM20091960062	RM20091963749	RM20091961928	RM20091962823	OMM1084	RM20091963643	RM20091960461
RM20091963132	RM20091964528	RM20091964026	RM20091963004	RM20091964285	RM20091965199	RM20091961921	RM20091961202	RM20091960586	RM20091964856	RM20091965205	RM20091965582	RM20091961011	RM20091963944	RM20091964462	RM20091962905	RM20091963350	RM20091964828	RM20091964893	RM20091960518	RM20091961705	RM20091960043	RM20091960141	RM20091963910	RM20091962549	RM20091963187	RM20091960266	RM20091963705	RM20091960573
RM20091963195	RM20091964543	RM20091964711	RM20091963184	RM20091964297	RM20091965211	RM20091962096	RM20091961271	RM20091960610	RM20091965111	RM20091965364	OMM1192	RM20091961259	RM20091965103	RM20091964657	RM20091963045	RM20091964296	RM20091965852	RM20091965501	RM20091960551	RM20091961892	RM20091960346	RM20091960171	RM20091963970	OMM1548	RM20091963432	RM20091960384	RM20091963951	RM20091960657
RM20091963442	RM20091964643	RM20091965087	RM20091963228	RM20091964807	RM20091965449	RM20091962104	RM20091961678	RM20091960960	RM20091965114	RM20091965431	RM20091960228	RM20091961838	RM20091965235	RM20091964675	RM20091963051	RM20091964405	RM20091965869	RM20091965532	RM20091960616	RM20091962078	RM20091960405	RM20091960204	RM20091963988	RM20091964879	RM20091964104	RM20091960385	RM20091964335	RM20091960671
RM20091963589	RM20091964860	RM20091965565	RM20091963343	RM20091964920	RM20091965593	RM20091962357	RM20091961784	RM20091960975	RM20091965640	RM20091965641	RM20091960482	RM20091961984	RM20091965300	RM20091964875	RM20091963157	OMM1361B	RM20091965900	OMM1657B	RM20091960820	RM20091962592	RM20091961207	RM20091960352	RM20091964044	RM20091965768	RM20091964145	RM20091960556	RM20091964360	RM20091960795
RM20091963624	RM20091965020	RM20091965840	RM20091963399	RM20091965282	RM20091965655	RM20091962811	RM20091961946	RM20091960982	RM20091965689	RM20091965804	RM20091960743	RM20091962494	RM20091965563	RM20091964903	RM20091963620	OMM1357	RM20091960117	RM20091960039	RM20091960821	RM20091962679	RM20091961627	RM20091960360	RM20091964131	RM20091961683	RM20091964380	RM20091960766	RM20091964561	RM20091960826
RM20091963662	RM20091965023	RM20091965855	RM20091963580	RM20091965324	RM20091965799	RM20091962932	RM20091962220	RM20091961422	RM20091965872	RM20091965836	RM20091960958	RM20091963074	RM20091960146	RM20091965038	RM20091963791	OMM1808	RM20091960219	RM20091960085	RM20091960835	RM20091962958	RM20091961628	RM20091960417	RM20091964247	RM20091964747	RM20091965310	RM20091960878	RM20091964730	RM20091960865
RM20091963719	RM20091965190	RM20091960020	RM20091963817	RM20091960094	RM20091965938	RM20091963370	RM20091962303	RM20091961429	RM20091960527	RM20091965861	RM20091961307	RM20091963100	RM20091961339	RM20091965233	RM20091964243	RM20091961148	RM20091960355	RM20091960378	RM20091960861	RM20091963016	RM20091961904	RM20091960455	RM20091964650	RM20091960011	RM20091965654	RM20091960945	RM20091964918	RM20091960901
RM20091963973	RM20091965252	RM20091960469	RM20091963866	RM20091960151	OMM5316	RM20091963920	RM20091962328	RM20091961445	RM20091960530	RM20091965887	RM20091961490	RM20091963465	RM20091961531	RM20091965341	RM20091964301	RM20091965151	RM20091960401	RM20091960473	RM20091960909	RM20091963089	RM20091961993	RM20091960641	RM20091964996	RM20091960806	RM20091965848	RM20091961172	RM20091965160	RM20091961281
RM20091964105	RM20091965340	RM20091960505	RM20091963883	RM20091960167	RM20091960156	RM20091964088	RM20091962329	RM20091961450	RM20091960935	OMM3020	RM20091961607	RM20091963927	RM20091961796	RM20091965525	RM20091964365	OMM3126	RM20091960413	RM20091960675	RM20091961055	RM20091963257	RM20091962006	RM20091961000	RM20091965125	RM20091961285	RM20091960584	RM20091961204	RM20091965273	RM20091961294
RM20091964187	RM20091965622	RM20091960513	RM20091963887	RM20091960188	RM20091961590	RM20091964127	RM20091962495	RM20091961482	RM20091961047	RM20091960186	RM20091962014	RM20091960919	RM20091962368	RM20091965669	RM20091964475	RM20091964939	RM20091960693	RM20091960855	RM20091961151	RM20091963413	RM20091962015	RM20091961313	RM20091965146	RM20091961293	RM20091960833	RM20091961263	RM20091965913	RM20091961379
RM20091964268	OMM5203	RM20091960550	RM20091963964	RM20091960302	RM20091961688	RM20091964230	RM20091962600	RM20091961500	RM20091961097	RM20091960214	RM20091962114	RM20091961883	RM20091962729	RM20091965961	RM20091964550	RM20091965289	RM20091960949	RM20091960880	RM20091961179	RM20091963438	RM20091962150	RM20091961343	RM20091965164	RM20091961499	RM20091961580	RM20091961419	RM20091965935	RM20091961653
RM20091964304	RM20091960035	RM20091960591	RM20091964122	RM20091960341	RM20091961876	RM20091964276	RM20091962620	RM20091961518	RM20091961109	RM20091960263	RM20091962198	RM20091962388	RM20091963109	OMY7INRA	RM20091964821	OMM5074C	RM20091961565	RM20091960921	RM20091961219	RM20091963816	RM20091962346	RM20091961783	RM20091965168	RM20091961537	RM20091961675	RM20091961483	OMM5157	RM20091961759
RM20091964432	RM20091960061	RM20091960649	RM20091964246	RM20091960547	RM20091961996	RM20091964372	RM20091962634	RM20091961545	RM20091961214	RM20091960363	RM20091962211	RM20091962821	RM20091963128	RM20091960026	RM20091965027	RM20091960014	RM20091961687	RM20091960925	RM20091961257	RM20091963892	RM20091962516	RM20091961814	RM20091965207	RM20091962330	RM20091961679	RM20091961578	OMYRGT46TUF	RM20091962193
RM20091964465	RM20091960147	RM20091960666	RM20091964283	RM20091960618	RM20091962946	RM20091964381	RM20091962662	RM20091961731	RM20091961383	RM20091960463	RM20091962650	RM20091963007	RM20091963997	RM20091960091	RM20091965054	RM20091960472	RM20091961834	RM20091961111	RM20091961266	RM20091964177	RM20091962574	RM20091962332	RM20091965371	RM20091962349	RM20091962082	RM20091961644	OMYRGT51TUF	RM20091962208
RM20091964501	RM20091960174	RM20091960700	RM20091964361	RM20091960830	RM20091963321	RM20091964646	RM20091963101	RM20091961870	RM20091961965	RM20091960499	RM20091963130	RM20091963634	OMM1443	RM20091960138	RM20091965176	RM20091960593	RM20091962071	RM20091961205	RM20091961358	RM20091964368	RM20091962684	RM20091962378	RM20091965585	RM20091962553	RM20091962364	RM20091961818	RM20091960044	RM20091962238
RM20091964974	RM20091960231	RM20091960728	RM20091964538	RM20091960876	RM20091964300	RM20091964978	RM20091963183	RM20091961925	RM20091962052	RM20091960504	RM20091963286	RM20091964288	OMM1467	RM20091960358	RM20091965440	RM20091960793	RM20091962127	RM20091961250	RM20091961406	RM20091964382	RM20091962700	RM20091962568	RM20091965708	RM20091962739	RM20091962587	RM20091961861	RM20091960195	RM20091962369
RM20091965030	RM20091960407	RM20091961002	RM20091964894	RM20091960896	RM20091964724	RM20091964987	RM20091963323	RM20091962056	RM20091962164	RM20091960549	RM20091963462	RM20091965904	OMM1643	RM20091960539	RM20091965690	RM20091961469	RM20091962192	RM20091961365	RM20091961661	RM20091964630	RM20091962834	RM20091962610	RM20091965803	RM20091963126	RM20091964574	RM20091961930	RM20091960282	RM20091962394
RM20091965034	RM20091960426	RM20091961070	RM20091964905	RM20091960913	OMM5254	RM20091965018	RM20091963403	RM20091962086	RM20091962245	RM20091960559	RM20091963693	OMM1200A	OMM5143	RM20091960595	OMM1325	RM20091961640	RM20091962421	RM20091961444	RM20091961728	RM20091964892	RM20091962969	RM20091962680	RM20091965827	RM20091963237	RM20091965162	RM20091961986	RM20091960343	RM20091962807
RM20091965290	RM20091960460	RM20091961119	RM20091965159	RM20091960928	ONE10ASC	RM20091965050	RM20091963591	RM20091962106	RM20091962260	RM20091960609	RM20091963743	OMY1UOG	RM20091960159	RM20091960662	OMYRGT6TUFA	RM20091961879	RM20091962484	RM20091961447	RM20091961860	RM20091965475	RM20091963058	RM20091963252	OMY7IIDIASA	RM20091963541	RM20091961448	RM20091961991	RM20091960445	RM20091962918
RM20091965413	RM20091960733	RM20091961137	RM20091965197	RM20091961192	OMM1753	RM20091965145	RM20091963598	RM20091962219	RM20091962298	RM20091960731	RM20091963757	OMM1670	RM20091960315	RM20091960827	RM20091960007	RM20091961934	RM20091962621	RM20091961497	RM20091961929	OMM1256	RM20091963104	RM20091963530	RM20091960193	RM20091963561	RM20091960068	RM20091962032	RM20091960517	RM20091963084
RM20091965800	RM20091960809	RM20091961166	RM20091965311	RM20091961251	OMM1768	RM20091965342	RM20091963759	RM20091962311	RM20091962447	RM20091960768	RM20091963873	RM20091960599	RM20091961140	RM20091961329	RM20091960063	RM20091962874	RM20091962857	RM20091961513	RM20091961977	RM20091960118	RM20091963249	RM20091963607	RM20091961003	RM20091964594	RM20091961186	RM20091962348	RM20091960615	RM20091963139
RM20091965812	RM20091960832	RM20091961229	RM20091965391	RM20091961533	RM20091960444	RM20091965460	RM20091963794	RM20091962333	RM20091962470	RM20091960874	RM20091963986	RM20091963824	RM20091962256	RM20091961472	RM20091960160	RM20091963053	RM20091963302	RM20091961536	RM20091961980	RM20091961264	RM20091963461	RM20091963756	RM20091961131	RM20091964607	RM20091961426	RM20091962438	RM20091960739	RM20091963162
RM20091965888	RM20091960846	RM20091961232	ALNTUF	RM20091961708	RM20091960502	OMM1828	RM20091963810	RM20091962403	RM20091962490	RM20091961074	RM20091963993	RM20091964580	RM20091963110	RM20091961605	RM20091960381	RM20091963229	RM20091963376	RM20091961549	RM20091962067	RM20091961491	RM20091963637	RM20091964310	RM20091961872	RM20091964762	RM20091962041	RM20091962505	RM20091960794	RM20091963574
OMM1543	RM20091960903	RM20091961270	OMM1170	RM20091962151	RM20091960522	RM20091960206	RM20091963833	RM20091962445	RM20091962511	RM20091961077	RM20091964272	RM20091962996	RM20091963747	RM20091961769	RM20091960404	RM20091963724	RM20091963573	RM20091961624	RM20091962274	RM20091962204	RM20091963798	RM20091964318	RM20091962058	RM20091964886	RM20091965000	RM20091962699	RM20091961258	RM20091963606
RM20091960090	RM20091960995	RM20091961349	OMM1582	RM20091962441	RM20091961043	RM20091960507	RM20091964083	RM20091962472	RM20091962629	RM20091961089	RM20091964619	RM20091960139	RM20091964589	RM20091961776	RM20091960581	RM20091964221	RM20091963605	RM20091961711	RM20091962433	RM20091962223	RM20091963803	RM20091964384	RM20091962842	RM20091964936	RM20091960002	RM20091962754	RM20091961316	RM20091963737
RM20091960272	RM20091961066	RM20091961404	RM20091960142	RM20091962764	RM20091961256	RM20091960533	RM20091964146	RM20091962660	RM20091962855	RM20091961149	RM20091964632	RM20091962407	RM20091964600	RM20091961932	RM20091960613	RM20091965107	RM20091963675	RM20091961729	RM20091962443	RM20091962499	RM20091964141	RM20091964570	RM20091962865	RM20091965560	RM20091960003	RM20091962841	RM20091961344	RM20091963907
RM20091960471	RM20091961093	RM20091961484	RM20091960221	RM20091962776	RM20091961601	RM20091961034	RM20091964233	RM20091962675	RM20091962941	RM20091961211	RM20091964847	RM20091963960	RM20091965080	RM20091962107	RM20091960699	RM20091965295	RM20091963922	RM20091961756	RM20091962594	RM20091962750	RM20091964696	RM20091964609	RM20091963018	RM20091965798	RM20091963820	RM20091963118	RM20091962439	RM20091963989
RM20091960576	RM20091961159	RM20091961519	RM20091960329	RM20091962885	RM20091961786	RM20091963455	RM20091964375	RM20091962709	RM20091962956	RM20091961277	RM20091964959	RM20091962258	RM20091965366	RM20091962162	RM20091960782	RM20091965410	RM20091964034	RM20091961775	RM20091962809	RM20091963020	RM20091964928	RM20091964742	RM20091963250	RM20091965922	RM20091964673	RM20091963428	RM20091962892	RM20091964096
RM20091960926	RM20091961246	RM20091961524	RM20091960369	RM20091963265	RM20091962583	RM20091963764	RM20091964494	RM20091962714	RM20091963112	RM20091961295	RM20091965047	OMM5154	RM20091965687	RM20091962291	RM20091960829	RM20091965559	RM20091964106	RM20091961873	RM20091962877	RM20091963065	RM20091965172	RM20091964788	RM20091964413	OMM5138	RM20091965886	RM20091963524	RM20091963158	RM20091964112
RM20091960964	RM20091961319	RM20091961557	RM20091960514	RM20091963654	RM20091962925	RM20091964025	RM20091964515	RM20091962733	RM20091963199	RM20091961340	RM20091965109	RM20091960224	RM20091965786	RM20091962419	RM20091960934	RM20091965845	RM20091964258	RM20091961933	RM20091962889	RM20091963160	RM20091965343	RM20091964966	RM20091965280	RM20091960244	RM20091965778	RM20091963593	RM20091963311	RM20091964149
RM20091961164	RM20091961395	RM20091961637	RM20091960569	RM20091963775	RM20091963017	RM20091964410	RM20091964531	RM20091962761	RM20091963203	RM20091961495	RM20091965512	RM20091960296	RM20091960066	RM20091962453	RM20091961009	OMM3065	RM20091964322	RM20091962040	RM20091963178	RM20091965076	RM20091965485	RM20091964975	RM20091965459	RM20091960379	RM20091965184	RM20091963781	RM20091963362	RM20091964227
RM20091961918	RM20091961400	RM20091961666	RM20091960575	RM20091963804	RM20091963289	RM20091964483	RM20091964919	RM20091963005	RM20091963235	RM20091961544	RM20091965905	RM20091961010	RM20091960390	RM20091962464	RM20091961044	RM20091960107	RM20091964343	RM20091962144	RM20091963366	RM20091965247	RM20091965674	RM20091964990	RM20091965581	RM20091961773	RM20091960844	RM20091963811	RM20091963394	RM20091964731
RM20091962019	RM20091961421	RM20091961853	RM20091960776	RM20091963856	RM20091963290	RM20091964681	RM20091964933	RM20091963146	RM20091963347	RM20091961599	OMM1200B	RM20091962405	RM20091961181	RM20091962465	RM20091961170	RM20091960238	RM20091964362	RM20091962300	RM20091963440	RM20091965883	RM20091965721	RM20091965307	OMM1288	RM20091962411	OMY1189	RM20091964137	RM20091963712	RM20091964962
RM20091962235	RM20091961479	RM20091961955	RM20091960939	RM20091963918	RM20091963763	RM20091964880	RM20091965041	RM20091963169	RM20091963355	RM20091961695	OMM1656	RM20091962787	RM20091961255	RM20091962503	RM20091961210	RM20091960374	RM20091964537	RM20091962406	RM20091963446	BX887563	RM20091965854	RM20091965363	RM20091960694	RM20091962475	RM20091960029	RM20091964292	RM20091964014	RM20091965049
RM20091962398	RM20091961616	RM20091961970	RM20091961136	RM20091963981	RM20091963795	RM20091964930	RM20091965138	RM20091963351	RM20091963360	RM20091961800	RM20091960140	RM20091965878	RM20091961460	RM20091962521	RM20091961296	RM20091961006	RM20091964577	RM20091962415	RM20091963503	OMM1261	RM20091965912	RM20091965423	RM20091962138	RM20091962534	RM20091960350	RM20091964316	RM20091964045	RM20091965072
RM20091962580	RM20091961672	RM20091962135	RM20091961161	RM20091964000	RM20091963865	RM20091965435	RM20091965165	RM20091963405	RM20091963390	RM20091961882	RM20091960169	RM20091962642	RM20091963094	RM20091962529	RM20091961487	RM20091961265	RM20091965527	RM20091962551	RM20091963640	RM20091960767	BX913059	RM20091965619	RM20091963475	RM20091963716	RM20091961417	RM20091964336	RM20091964069	RM20091965188
RM20091962640	RM20091961741	RM20091962179	RM20091961581	RM20091964057	RM20091964386	RM20091965542	RM20091965298	RM20091963772	RM20091963639	RM20091962008	RM20091960347	RM20091960071	RM20091963773	RM20091962557	RM20091961515	RM20091961949	RM20091965634	RM20091962572	RM20091963769	RM20091964921	OMM1457	RM20091965864	RM20091964068	RM20091963872	RM20091962278	RM20091964379	RM20091964808	RM20091965294
RM20091962653	RM20091961788	RM20091962309	RM20091961867	RM20091964377	RM20091964527	RM20091965570	RM20091965348	RM20091963792	RM20091963656	RM20091962031	RM20091960454	RM20091961332	RM20091960437	RM20091962593	RM20091961564	RM20091962119	RM20091965662	RM20091962672	RM20091963780	OMM1566	RM20091960134	RM20091960944	RM20091964579	RM20091963915	RM20091962651	RM20091964387	RM20091965437	RM20091965303
RM20091962711	RM20091961862	RM20091962351	RM20091961972	RM20091964408	RM20091964969	RM20091965695	RM20091965824	RM20091963828	RM20091963684	RM20091962089	RM20091961012	RM20091961718	RM20091960588	RM20091962638	RM20091961690	RM20091962239	OMM1606	RM20091962725	RM20091963829	RM20091964392	RM20091960567	RM20091961282	RM20091964790	RM20091964267	RM20091965255	RM20091964668	RM20091965500	RM20091965355
RM20091962810	RM20091961945	RM20091962460	RM20091961992	RM20091964585	RM20091964979	OMM1236	RM20091965839	RM20091963848	RM20091963789	RM20091962117	RM20091961065	RM20091962890	RM20091960674	RM20091962788	RM20091961700	RM20091962625	RM20091960220	RM20091962746	RM20091963849	OMM1578B	RM20091960862	RM20091962416	RM20091965820	RM20091964659	RM20091961117	RM20091964780	RM20091965943	RM20091965357
RM20091962981	RM20091962043	RM20091962617	RM20091962232	RM20091964655	RM20091965319	RM20091960078	RM20091960136	RM20091964084	RM20091964049	RM20091962148	RM20091961470	RM20091963540	RM20091961049	RM20091962975	RM20091961809	RM20091962832	RM20091960537	RM20091962820	RM20091964092	OMM1764B	RM20091961388	RM20091962775	OMM1093	RM20091965079	OMY1001UW	RM20091964812	RM20091960496	RM20091965375
RM20091963000	RM20091962142	RM20091963019	RM20091962335	RM20091964829	RM20091965454	RM20091960279	RM20091960294	RM20091964476	RM20091964108	RM20091962236	RM20091962708	RM20091963735	RM20091961244	RM20091963188	RM20091961858	RM20091963499	RM20091962152	RM20091962826	RM20091964132	OMM5100	RM20091961806	RM20091962960	RM20091961826	RM20091965609	RM20091960058	RM20091965040	RM20091961677	RM20091965467
RM20091963809	RM20091962145	RM20091963819	RM20091962466	RM20091964994	RM20091960194	RM20091960367	RM20091960306	RM20091964513	RM20091964249	RM20091962265	RM20091964061	RM20091964383	RM20091961825	RM20091963483	RM20091961987	RM20091963544	RM20091962851	RM20091962888	RM20091964134	RM20091961591	RM20091961959	RM20091963044	RM20091962057	RM20091965613	RM20091961951	RM20091965452	RM20091962075	RM20091965611
RM20091963912	RM20091962196	RM20091963830	RM20091962688	RM20091965098	RM20091960319	RM20091960603	RM20091960333	RM20091964628	RM20091964289	RM20091962308	RM20091964155	RM20091965711	RM20091962178	RM20091963787	RM20091961989	RM20091963949	RM20091962962	RM20091963277	RM20091964457	RM20091962136	RM20091962353	RM20091963182	RM20091962066	RM20091965902	RM20091963515	RM20091965545	RM20091964436	RM20091965718
RM20091963917	RM20091962201	RM20091963861	RM20091962867	RM20091965214	RM20091960920	RM20091960917	RM20091960361	RM20091964635	RM20091964305	RM20091962515	RM20091964420	RM20091962377	RM20091963141	RM20091963900	RM20091962001	RM20091964841	RM20091963264	RM20091963294	RM20091964539	RM20091962155	RM20091963260	RM20091963342	RM20091963274	RM20091961242	RM20091965587	RM20091965733	CR373404	RM20091965789
RM20091964050	RM20091962218	RM20091963913	RM20091962872	RM20091965245	RM20091961036	RM20091961593	RM20091960570	RM20091964636	RM20091964786	RM20091962532	RM20091965558	RM20091964254	RM20091963196	RM20091963961	RM20091962307	RM20091965075	RM20091963597	RM20091963310	RM20091964779	RM20091962227	RM20091963974	RM20091963460	RM20091960192	RM20091962381	RM20091963138	RM20091960435	OMM1327	RM20091965793
RM20091964143	RM20091962277	RM20091964075	RM20091962959	RM20091965405	RM20091961254	RM20091962362	RM20091960885	RM20091964648	RM20091964844	RM20091962623	OMM1096	RM20091965407	RM20091963201	RM20091963999	RM20091962313	RM20091965157	RM20091963626	RM20091963356	RM20091964784	RM20091962901	RM20091965029	RM20091964419	RM20091960208	RM20091963552		RM20091960441	RM20091960957	RM20091960019
RM20091964148	RM20091962564	RM20091964173	RM20091963032	RM20091965642	RM20091961410	RM20091962546	RM20091961267	RM20091964801	RM20091964845	RM20091962670	OMM1130	RM20091965635	RM20091963282	RM20091964701	RM20091962319	RM20091965566	RM20091963697	RM20091963535	RM20091964803	RM20091963114	RM20091965126	RM20091964710	RM20091961165	RM20091965057		RM20091960716	RM20091961511	RM20091960368
RM20091964203	RM20091962579	RM20091964355	RM20091963081	RM20091965823	RM20091961820	RM20091962929	RM20091961534	RM20091964863	RM20091964907	RM20091962833	OMM1462	OMM1330A	RM20091963318	RM20091964852	RM20091962322	RM20091965879	RM20091963727	RM20091963632	RM20091965262	RM20091963142	RM20091965376	OMM1584	RM20091961739	RM20091961026		RM20091960895	RM20091964725	RM20091961057
RM20091964281	RM20091962803	RM20091964366	RM20091963335	OMM1660	RM20091962251	RM20091963030	RM20091961553	RM20091964946	RM20091965006	RM20091962860	BX311224	RM20091961837	RM20091963610	RM20091964891	RM20091962545	RM20091960082	RM20091963753	RM20091963673	RM20091965461	RM20091963782	RM20091965496	RM20091961238	RM20091961905	RM20091961463		RM20091960983	RM20091960787	RM20091961489
RM20091964371	RM20091962814	RM20091964463	RM20091963477	RM20091960242	RM20091962456	RM20091963231	RM20091961829	RM20091964988	RM20091965008	RM20091962910	OMM1368	RM20091965892	RM20091964728	RM20091964956	RM20091962674	CA367675	RM20091963893	RM20091963728	RM20091965473	RM20091963834	RM20091965663	RM20091961748	RM20091963648	RM20091961520		RM20091961199	RM20091961290	RM20091961656
RM20091964433	RM20091962819	RM20091964468	RM20091963498	RM20091960246	RM20091963156	RM20091964704	RM20091961884	RM20091965061	RM20091965629	RM20091963299	OMM1711	RM20091964793	RM20091964752	RM20091965724	RM20091962763	RM20091961715	RM20091964115	RM20091963766	RM20091965522	RM20091963958	RM20091965929	RM20091962437	RM20091964388	RM20091961966		RM20091961275	RM20091964924	RM20091961725
RM20091964536	RM20091962934	RM20091964782	RM20091963710	RM20091960252	RM20091963839	RM20091964820	RM20091961900	RM20091965101	RM20091965644	RM20091963375	GH1	RM20091960528	RM20091965005	RM20091965818	RM20091962894	RM20091962792	RM20091964401	RM20091963838	RM20091965639	RM20091963963	CA361411	RM20091962806	RM20091964913	RM20091962318		RM20091962130	RM20091965528	RM20091962108
RM20091964743	RM20091962990	RM20091965032	RM20091963844	RM20091960262	RM20091964099	RM20091965571	RM20091961979	RM20091965153	RM20091965678	RM20091963510	OMM1341	RM20091965113	RM20091965186	RM20091965835	RM20091962927	RM20091964038	RM20091964741	RM20091963955	RM20091965723	RM20091964638	OMM1003	RM20091964442	RM20091965278	RM20091962424		RM20091962205	RM20091965513	RM20091962243
RM20091965011	RM20091963115	RM20091965286	RM20091963859	RM20091960470	RM20091964551	RM20091965596	RM20091962167	RM20091965338	RM20091965816	RM20091963653	RM20091960877	RM20091965442	RM20091965595	RM20091965914	RM20091963012	RM20091964121	RM20091965127	RM20091963957	RM20091960126	RM20091964699	OMM1316	RM20091965309	RM20091965517	RM20091963905		RM20091962280	RM20091963842	RM20091962468
RM20091965181	RM20091963135	RM20091965370	RM20091963868	RM20091960535	RM20091965264	RM20091965692	RM20091962254	RM20091965476	OMM1657A	RM20091963714	RM20091963333	RM20091965928	RM20091965955	OMM1764A	RM20091963037	RM20091964942	RM20091965260	RM20091963995	RM20091961175	RM20091960449	RM20091960010	RM20091965625	RM20091962577	RM20091964039		RM20091962299	RM20091965519	RM20091962550
RM20091965399	RM20091963161	RM20091965374	RM20091963938	RM20091960918	RM20091964932	RM20091965963	RM20091962296	RM20091965497	RM20091960012	RM20091963729	RM20091965136	OMM1369	RM20091961790	RM20091960021	RM20091963068	RM20091965369	RM20091965372	RM20091964162	RM20091961361	RM20091960741	RM20091965448	OMM1238	RM20091963513	RM20091964188		RM20091962340	RM20091965646	RM20091962663
RM20091965842	RM20091963208	RM20091965432	RM20091964094	RM20091960986	OMM1214	RM20091960030	RM20091962563	RM20091965589	RM20091960105	RM20091963854	RM20091964855	RM20091962214	RM20091962173	RM20091960110	RM20091963124	RM20091965626	RM20091965504	RM20091964196	RM20091962434	RM20091961496	OMM1365	OMM1610B	RM20091964184	RM20091964972		RM20091962404	RM20091963875	RM20091962938
RM20091965946	RM20091963236	RM20091965616	RM20091964109	RM20091961407	OMM1539A	RM20091960729	RM20091962698	RM20091965715	RM20091960276	RM20091963878	RM20091963595	RM20091964750	RM20091962778	RM20091960338	RM20091963136	RM20091965875	RM20091965813	RM20091964359	RM20091963120	RM20091961745	RM20091960725	RM20091961038	OMYFGT24TUF	RM20091965182		RM20091962548	RM20091963971	RM20091963270
RM20091960008	RM20091963267	RM20091965653	RM20091964168	RM20091961610	OMM1628	RM20091961092	RM20091963069	RM20091965717	RM20091960339	RM20091964063	RM20091965574	RM20091961052	RM20091963931	RM20091960940	RM20091963173	RM20091961163	OMM1352	RM20091964533	RM20091963180	RM20091962949	RM20091960883	RM20091960629	OMM1436	RM20091965468		RM20091962575	RM20091961585	RM20091963319
RM20091960101	RM20091963435	RM20091965893	RM20091964229	RM20091961639	OMM5306	RM20091962242	RM20091963197	RM20091965923	RM20091960572	RM20091964130	OMM5152	RM20091964396	RM20091964470	RM20091961156	RM20091963221	RM20091961999	OMM3041	RM20091964602	RM20091963191	RM20091964482	RM20091960955	RM20091961337	RM20091962073	RM20091960031		RM20091962782	RM20091965122	RM20091963691
RM20091960170	RM20091963501	RM20091965898	RM20091964284	RM20091961808	OMY1002UW	RM20091962263	RM20091963200	RM20091965930	RM20091960598	RM20091964373	RM20091964722	RM20091961957	RM20091964971	RM20091961714	RM20091963381	RM20091963696	OMM5297	RM20091964756	RM20091964328	RM20091965334	RM20091962105	RM20091962726	RM20091962870	RM20091960213		RM20091962846	RM20091964192	RM20091964223
RM20091960178	RM20091963534	RM20091960133	RM20091964524	RM20091962109	OMM1465	RM20091963204	RM20091963256	RM20091960179	RM20091960617	RM20091964458	RM20091960839	RM20091963557	RM20091965858	RM20091962153	RM20091963416	RM20091963723	RM20091961652	RM20091964827	RM20091964340	RM20091965949	RM20091962255	RM20091963538	RM20091961923	RM20091960229		RM20091963209	RM20091964064	RM20091964261
RM20091960250	RM20091963825	RM20091960622	RM20091964526	RM20091962159	RM20091960421	RM20091963512	RM20091963268	RM20091961061	RM20091960744	RM20091964493	RM20091960886	RM20091964005	RM20091965863	RM20091962641	RM20091963418	RM20091964554	RM20091961940	RM20091964839	RM20091965091	RM20091963666	RM20091963134	RM20091963972	RM20091962038	RM20091960438		RM20091963227	RM20091962079	RM20091964806
RM20091960534	RM20091963826	RM20091960842	RM20091964542	RM20091962279	RM20091961333	RM20091964030	RM20091963421	RM20091961135	RM20091960746	RM20091964683	RM20091961594	RM20091960888	RM20091961453	RM20091963484	RM20091963473	RM20091965701	RM20091962088	RM20091964881	RM20091965365	RM20091960892	RM20091963193	RM20091960803	RM20091964053	RM20091960702		RM20091963476	RM20091964608	RM20091965406
RM20091960762	RM20091963855	RM20091960898	RM20091964553	RM20091962320	RM20091961982	RM20091964206	RM20091963457	RM20091961310	RM20091960764	RM20091964689	RM20091962735	RM20091963062	RM20091961473	RM20091963983	RM20091963631	RM20091965736	RM20091963670	RM20091964943	OMM1135	RM20091960902	RM20091963243	RM20091960081	RM20091960818	RM20091960972		RM20091963523	RM20091964922	RM20091965584
RM20091960869	RM20091963899	RM20091961001	RM20091964623	RM20091962375	RM20091964242	RM20091964866	RM20091963679	RM20091961602	RM20091960825	RM20091964713	RM20091963296	RM20091963103	RM20091963354	RM20091964239	RM20091963686	OMM1201	RM20091964411	RM20091964991	OMM1139	RM20091961990	RM20091963244	RM20091961927	RM20091960168	RM20091961060		RM20091963554	RM20091965392	RM20091965817
RM20091960927	RM20091964013	RM20091961015	RM20091964759	RM20091963145	RM20091960677	OMM1381	RM20091963841	RM20091961636	RM20091960952	RM20091964765	RM20091963393	RM20091961100	RM20091964080	RM20091964558	RM20091963750	OMM1712	RM20091964799	RM20091965066	OMM1360	RM20091964119	RM20091963566	RM20091962100	RM20091960251	RM20091961249		RM20091963836	RM20091961674	RM20091965919
RM20091961309	RM20091964191	RM20091961067	RM20091964989	RM20091963339	RM20091960600	OMM1557	RM20091964341	RM20091961691	RM20091961196	RM20091964805	RM20091963946	RM20091963470	RM20091964238	RM20091964853	RM20091963754	RM20091960726	RM20091964815	RM20091965192	OMM1371	RM20091961397	RM20091964175	RM20091962331	RM20091960387	RM20091961346		RM20091964231	RM20091960376	BX076085
RM20091961471	RM20091964224	RM20091961323	RM20091965026	RM20091963425	RM20091964152	OMM1642	RM20091964597	RM20091962502	RM20091961350	RM20091964831	RM20091963969	RM20091963932	RM20091965275	RM20091965033	RM20091963962	RM20091960867	RM20091965434	RM20091965267	OMM1775	RM20091961609	RM20091964315	RM20091962868	RM20091960495	RM20091961380		RM20091964604	RM20091963137	OMM1118
RM20091961494	RM20091964264	RM20091961382	RM20091965094	RM20091963609	RM20091965191	RM20091960050	RM20091964798	RM20091962628	RM20091961413	RM20091964955	RM20091964507	RM20091960660	RM20091960875	RM20091965070	RM20091964259	RM20091961247	RM20091965575	RM20091965277	OMYRGT6TUFB	RM20091962713	RM20091964598	RM20091962883	RM20091960587	RM20091961449		RM20091964909	RM20091963468	OMM1665
RM20091962097	RM20091964395	RM20091961649	RM20091965219	RM20091963930	RM20091960754	RM20091960123	RM20091965112	RM20091962732	RM20091961767	RM20091965163	RM20091964621	RM20091963659	RM20091961355	OMM1444A	RM20091964265	RM20091961778	RM20091961025	RM20091965346	RM20091962940	RM20091962426	RM20091964767	RM20091965783	RM20091960760	RM20091961510		RM20091965215	RM20091960165	RM20091962250
RM20091962691	RM20091964495	RM20091961651	RM20091965331	RM20091963977	RM20091960249	RM20091960298	RM20091965668	RM20091962856	RM20091961994	RM20091965201	RM20091965015	RM20091962442	RM20091965389	OMM1784	RM20091964269	RM20091962854	RM20091961291	RM20091965458	RM20091964980	RM20091963492	RM20091965927	RM20091963056	RM20091961476	RM20091961606		RM20091965397	RM20091964908	RM20091963411
RM20091963812	RM20091964599	RM20091962076	RM20091965359	RM20091964089	RM20091963937	RM20091960479	RM20091965697	RM20091963008	RM20091962102	RM20091965222	RM20091965785	RM20091960383	RM20091964169	OMM1220	RM20091964358	RM20091965577	RM20091961318	RM20091965534	RM20091961115	RM20091963571	RM20091960424	RM20091965394	RM20091961621	RM20091961915		RM20091965529	RM20091960016	RM20091963800
RM20091964422	RM20091964685	RM20091962165	RM20091965383	RM20091964204	RM20091965321	RM20091960531	RM20091965775	RM20091963263	RM20091962134	RM20091965251	RM20091961072	RM20091962744	BHMS429	OMM5099A	RM20091964434	RM20091960310	RM20091962174	RM20091965821	RM20091961386	RM20091963992	RM20091960592	RM20091965508	RM20091961802	RM20091961948		RM20091965947	RM20091960465	RM20091965110
RM20091964425	RM20091964702	RM20091962500	RM20091965425	RM20091964273	RM20091960137	RM20091960542	RM20091965917	RM20091963320	RM20091962149	RM20091965304	RM20091961576	RM20091961667	RM20091960969	OMYRGT17TUF	RM20091964461	RM20091960836	RM20091962360	RM20091965838	RM20091962234	RM20091965362	RM20091960751	RM20091965659	RM20091962596	RM20091961950		BX313739	RM20091962535	RM20091965409
RM20091964500	RM20091964723	RM20091962624	RM20091965526	RM20091964548	RM20091960879	RM20091960738	RM20091965950	RM20091963388	RM20091962217	RM20091965379	RM20091962317	RM20091960931	RM20091961770	RM20091960112	RM20091964486	RM20091961245	RM20091962565	RM20091965843	RM20091962666	RM20091965837	RM20091962282	RM20091960932	RM20091962710	RM20091962210		OMM1209	RM20091963835	RM20091965621
RM20091964671	RM20091964945	RM20091962697	RM20091965650	RM20091964706	RM20091964298	RM20091960912	RM20091960475	RM20091963681	RM20091962261	RM20091965470	RM20091962622	RM20091961694	RM20091963529	RM20091961004	RM20091964492	RM20091961414	RM20091963881	RM20091965911	RM20091965841	RM20091963755	RM20091962482	RM20091963822	RM20091962783	RM20091962341		OMM5261	RM20091963837	RM20091962392
RM20091965602	RM20091965071	RM20091962822	RM20091965728	RM20091964937	RM20091964466	RM20091960946	RM20091960523	RM20091964020	RM20091962305	RM20091965479	RM20091964219	RM20091962808	RM20091965954	RM20091961464	RM20091964587	RM20091962334	RM20091964144	RM20091960354	RM20091964236	RM20091965926	RM20091963453	RM20091960060	RM20091963295	RM20091962667		OMM5309	RM20091964865	RM20091965773
OMM1152	RM20091965092	RM20091962933	RM20091965791	RM20091964984	RM20091964593	RM20091960971	RM20091960545	RM20091964032	RM20091962358	RM20091965505	RM20091964631	RM20091963314	RM20091961234	RM20091961758	RM20091964625	RM20091963131	RM20091964957	RM20091960802	RM20091960255	RM20091964320	RM20091965241	RM20091960205	RM20091964976	RM20091962790		OMY13DIAS	RM20091964923	RM20091960317
OMY1032UW	RM20091965198	RM20091963330	OMM1298	RM20091965056	RM20091964842	RM20091961107	RM20091960791	RM20091964251	RM20091962463	RM20091965664	RM20091964833	RM20091965422	OMM5192	RM20091962197	RM20091964721	RM20091963879	OMM1746	RM20091961133	RM20091964027	RM20091960654	RM20091960259	RM20091960753	RM20091965123	RM20091962845		RM20091960749	RM20091962154	RM20091960389
OMM1082	RM20091965227	RM20091963365	OMM1322	RM20091965552	RM20091965266	RM20091961118	RM20091960976	RM20091964654	RM20091963254	RM20091965705	RM20091960017	RM20091964802	RM20091961028	RM20091962400	RM20091964746	RM20091964771	RM20091960476	RM20091961141	RM20091960459	RM20091965361	RM20091960318	RM20091961056	RM20091965272	RM20091962899		RM20091964154	RM20091964963	RM20091960554
OMM1355	RM20091965246	RM20091963645	OMM1449	RM20091965580	RM20091963095	RM20091961673	RM20091962350	RM20091964925	RM20091963422	RM20091965859	RM20091960235	RM20091965446	RM20091961223	RM20091962552	RM20091964753	RM20091965498	RM20091961227	RM20091961556	RM20091961709	RM20091962471	RM20091965530	RM20091961532	OMM1563	RM20091962976		RM20091962706	OMY1013UW	RM20091962122
RM20091962862	RM20091965257	RM20091963700	RM20091960064	RM20091965819	RM20091963097	RM20091961685	RM20091963002	RM20091965093	RM20091963486	RM20091965877	RM20091961391	RM20091965320	RM20091962451	RM20091962916	RM20091964761	OMM5026	RM20091961608	RM20091961908	RM20091961328	RM20091963034	RM20091961528	RM20091961752	RM20091960509	RM20091963167		RM20091964644		RM20091962631
RM20091963568	RM20091965265	RM20091964590	RM20091960552	OMM5025	RM20091963166	RM20091961822	RM20091963222	RM20091965274	RM20091963493	RM20091965952	RM20091961869	RM20091963439	RM20091963745	RM20091963116	RM20091964811	RM20091964174	RM20091963788	RM20091962059	RM20091962359	RM20091960656	RM20091961598	RM20091961943	RM20091961221	RM20091963192		RM20091964041		RM20091963106
RM20091960122	RM20091965299	RM20091965465	RM20091961113	OMM1439	RM20091963831	RM20091962633	RM20091963850	RM20091965597	RM20091963807	RM20091965959	RM20091962264	RM20091960774	RM20091962481	RM20091963291	RM20091964931	OMM1798	RM20091964125	RM20091962569	RM20091962507	RM20091961648	RM20091962913	RM20091962209	RM20091961562	RM20091963555		RM20091963551		RM20091965490
RM20091960190	RM20091965329	RM20091965734	RM20091961372	OMM5035	RM20091964665	RM20091962669	RM20091963884	RM20091965675	RM20091963904	RM20091960129	RM20091962757	RM20091961239	RM20091962496	RM20091963967	RM20091964954	CA055420	RM20091964938	RM20091962805	RM20091960233	RM20091962347	RM20091963494	RM20091962517	RM20091961692	RM20091963851		RM20091965132		RM20091965683
RM20091960433	RM20091965415	RM20091965750	RM20091961723	RM20091960784	RM20091965189	RM20091962898	RM20091964306	RM20091965702	RM20091964208	RM20091960428	RM20091962930	RM20091963262	RM20091963288	RM20091964440	RM20091965010	RM20091960923	RM20091964157	RM20091962919	RM20091963280	RM20091963860	RM20091963526	RM20091963487	RM20091961760	RM20091963894		OMM1663		RM20091965691
RM20091961102	RM20091965436	RM20091965758	RM20091961749	RM20091960831	RM20091960120	RM20091962989	RM20091964329	CA061915	RM20091964389	RM20091960816	RM20091963071	RM20091963225	RM20091965135	RM20091964481	RM20091965052	RM20091960993	RM20091964364	RM20091963033	RM20091964048	RM20091964201	RM20091964017	RM20091963644	RM20091962542	RM20091963945		RM20091960163		RM20091961630
RM20091961907	RM20091965466	OMM1085	RM20091962003	RM20091961035	RM20091961643	RM20091963057	RM20091964487	OMM1491	RM20091964478	RM20091960936	RM20091963176	OMM1361A	RM20091960257	RM20091964568	RM20091965258	RM20091964167	RM20091961506	RM20091963059	RM20091964838	RM20091964773	RM20091964151	RM20091963726	RM20091962717	RM20091964185		RM20091960596		RM20091963210
RM20091962158	RM20091965506	OMM3120	RM20091962081	RM20091961409	RM20091961747	RM20091963198	RM20091965187	OMY1090UW	RM20091964541	RM20091961184	RM20091963189	OMM5074A	RM20091961041	RM20091964958	RM20091965327	RM20091965137	RM20091962474	RM20091963500	RM20091965524	RM20091965368	RM20091964260	RM20091963941	RM20091963689	RM20091964354		RM20091960623		RM20091963577
RM20091962879	RM20091965603	OMM5005	RM20091962259	RM20091962408	RM20091962166	RM20091963218	RM20091965318	OMM5126	RM20091964809	RM20091961454	RM20091963220	RM20091960589	RM20091961193	RM20091965443	RM20091965402	RM20091965332	RM20091962747	RM20091963956	RM20091960608	RM20091965749	RM20091964586	RM20091964010	RM20091960327	RM20091964661		RM20091960642		RM20091964614
RM20091962923	RM20091965652	OMM5164	RM20091962595	RM20091962773	RM20091963073	RM20091963224	RM20091965520	RM20091963495	RM20091964935	RM20091961514	RM20091963531	RM20091963876	RM20091961222	RM20091965484	RM20091965408	RM20091965612	RM20091963688	RM20091964040	RM20091960924	RM20091965794	RM20091964680	RM20091964235	RM20091961941	RM20091964800		RM20091960679		RM20091965042
RM20091964291	RM20091965730	OMM5204	RM20091962961	RM20091963021	RM20091963361	RM20091963404	RM20091965649	RM20091964885	RM20091965068	RM20091961527	RM20091963617	RM20091960907	RM20091961394	RM20091960199	RM20091965489	RM20091960084	RM20091964015	RM20091964627	RM20091961655	RM20091960088	RM20091964692	RM20091964666	RM20091963612	RM20091964840		RM20091960705		OMM1026
RM20091964571	RM20091965774	OMM1337	RM20091962998	RM20091963801	RM20091964313	RM20091963504	RM20091965761	RM20091960211	RM20091965081	RM20091961568	RM20091964164	RM20091961654	RM20091961546	RM20091960377	RM20091965492	RM20091960245	RM20091964076	RM20091964899	RM20091962480	RM20091960992	RM20091965486	RM20091964999	RM20091965064	RM20091964869		RM20091960727		RM20091965907
RM20091965554	RM20091965850	RM20091962696	RM20091963108	RM20091964917	RM20091961832	RM20091963516	CR371139	RM20091960395	RM20091965237	RM20091961713	RM20091964729	RM20091961693	RM20091961563	RM20091960388	RM20091965591	RM20091962786	RM20091964195	RM20091965493	RM20091962597	RM20091961681	RM20091961841	RM20091965142	RM20091960087	RM20091964901		RM20091961126
RM20091960568	RM20091965896	RM20091962225	RM20091963701	RM20091965243	RM20091964351	RM20091963583	OMM1097	RM20091960720	RM20091965316	RM20091961721	RM20091962323	RM20091961810	RM20091961888	RM20091960701	RM20091965670	RM20091963164	RM20091965801	RM20091965681	RM20091963672	RM20091963223	RM20091963154	RM20091965829	RM20091964888	RM20091965019		RM20091961162
RM20091960985	OMM1228	RM20091964150	RM20091964314	RM20091960216	RM20091964674	RM20091963914	RM20091963864	RM20091960838	RM20091965480	RM20091961746	RM20091962352	RM20091961847	RM20091962011	RM20091960859	RM20091965776	RM20091965013	RM20091960558	RM20091965720	RM20091964323	RM20091964606	RM20091960987	RM20091965933	RM20091960226	RM20091965224		RM20091961326
RM20091961437	OMM1603	OMM5121	RM20091964391	RM20091960714	OMM1749	RM20091964060	RM20091960143	RM20091961098	RM20091965656	RM20091961761	RM20091962379	RM20091962101	RM20091962454	RM20091961433	RM20091965832	OMM1607	RM20091964116	RM20091965741	RM20091964878	RM20091965212	RM20091961577	RM20091960868	RM20091961013	RM20091965248		RM20091961813
RM20091961572	RM20091960041	RM20091962094	RM20091964427	RM20091962139	RM20091964416	RM20091964278	RM20091961427	RM20091961710	RM20091965831	RM20091961854	RM20091962491	RM20091962953	RM20091962654	RM20091962240	RM20091960144	RM20091962973	RM20091960447	OMM1440	RM20091961874	RM20091963480	RM20091962678	RM20091961569	RM20091961642	RM20091965764		RM20091961886
RM20091961660	RM20091960079	RM20091962852	RM20091965016	RM20091962767	RM20091960752	RM20091964346	RM20091963285	RM20091961772	RM20091965906	RM20091961967	RM20091963367	RM20091962982	RM20091962762	RM20091962816	RM20091960730	RM20091964497	RM20091961893	OMM1739	RM20091964754	RM20091961104	RM20091963623	RM20091965393	RM20091963052	RM20091965944		RM20091962186
RM20091961912	RM20091960290	RM20091965281	RM20091965380	RM20091964071	RM20091960974	RM20091964491	RM20091964864	RM20091961887	OMM1412A	RM20091962055	RM20091964624	RM20091963324	RM20091963217	RM20091963364	RM20091960938	RM20091961817	RM20091963975	OMM3067	RM20091962603	RM20091963014	RM20091960396	RM20091961435	RM20091964676	RM20091965953		RM20091962202
RM20091962991	RM20091960419	RM20091960053	RM20091965418	RM20091964902	RM20091961381	RM20091964504	RM20091964970	RM20091961947	OMM1438	RM20091962206	RM20091964883	RM20091963368	RM20091963332	RM20091963660	RM20091961037	RM20091962366	RM20091965130	OMM5216	RM20091960645	RM20091965154	RM20091960834	RM20091965937	RM20091964690	RM20091960287		RM20091962345
RM20091963722	RM20091960440	RM20091960203	RM20091965747	OMM1508	RM20091961670	RM20091964532	RM20091965291	RM20091961956	OMM1544	RM20091962233	RM20091965131	RM20091963525	RM20091963702	RM20091964182	RM20091961082	RM20091961368	RM20091960604	OMM1241	RM20091963102	RM20091960450	RM20091961236	RM20091963614	RM20091965599	RM20091960717		RM20091962676
RM20091963954	RM20091960480	RM20091960709	BX087219	OMM1636	RM20091962085	RM20091964715	RM20091965576	RM20091961964	OMM5108	RM20091962705	RM20091960284	RM20091964345	RM20091963711	RM20091964257	RM20091961411	RM20091964565	RM20091960970	OMM1412B	RM20091964862	RM20091961005	RM20091964294	RM20091965605	RM20091965085	RM20091962412		RM20091962839
RM20091963991	RM20091960647	RM20091960813	RM20091960477	RM20091964825	RM20091962241	RM20091964849	RM20091965757	RM20091962216	RM20091960713	RM20091962861	RM20091960544	RM20091965147	RM20091964047	RM20091965287	RM20091961779	RM20091960337	RM20091961632	RM20091960853	RM20091963042	RM20091961087	RM20091961334	RM20091963401	RM20091960308	RM20091962452		RM20091962963
RM20091964467	RM20091960665	RM20091961311	RM20091961864	RM20091962479	RM20091962526	RM20091965124	RM20091961017	RM20091962401	RM20091962252	RM20091962947	RM20091962191	RM20091965322	RM20091964067	RM20091965704	RM20091961960	RM20091961022	RM20091961638	RM20091960956	RM20091965129	RM20091962685	RM20091965381		RM20091960176	RM20091962884		RM20091963357
RM20091965206	RM20091960755	RM20091961341	RM20091964926	RM20091964540	RM20091962566	RM20091965204	RM20091964293	RM20091962519	RM20091962785	RM20091962977	RM20091965002	RM20091965481	RM20091964518	OMY207UOG	RM20091962016	RM20091961754	RM20091961763	RM20091961153	RM20091960631	RM20091962866	RM20091960222		RM20091960451	RM20091962984		RM20091963389
RM20091965503	RM20091960908	RM20091961855	RM20091960209	RM20091963919	RM20091962749	RM20091965511	BX870052A	RM20091962727	RM20091965962	RM20091963205	RM20091965601	RM20091965610	RM20091964792	RM20091961225	RM20091962113	RM20091961919	RM20091961856	RM20091965426		RM20091963454	RM20091962376		RM20091963304	RM20091963682		RM20091963982
OMM1205	RM20091961287	RM20091962177	RM20091961029	RM20091965709	RM20091964733	RM20091965782	OMM1207	RM20091962736	OMM1448	RM20091963298	RM20091960271	RM20091960052	RM20091965339	RM20091964768	RM20091962126	RM20091964398	RM20091962609	RM20091960227		RM20091964519	RM20091961738		RM20091963575	RM20091964474		RM20091964072
OMM1302	RM20091961468	RM20091962248	RM20091961362	RM20091960824	RM20091964735	RM20091965895	OMM1265	RM20091963261	OMM5195	RM20091963449	RM20091964998	RM20091960668	RM20091965916	RM20091961096	RM20091962253	RM20091964414	RM20091962886	RM20091962383		RM20091965221			RM20091963896	RM20091965412		RM20091964129
RM20091962035	RM20091961750	RM20091962602	OMM1211	RM20091961376	RM20091965051	RM20091965932	OMM1632	RM20091963352	RM20091960331	RM20091963543	RM20091965250	RM20091962397	RM20091960815	RM20091963536	RM20091962530	RM20091965667	RM20091963469	RM20091960075		RM20091960627			RM20091964641	OMM1389		RM20091964244
RM20091963708	RM20091961863	RM20091962607	RM20091963578	RM20091961612	RM20091965543	RM20091960005	OMM5058	RM20091963382	RM20091963939	RM20091963959	RM20091960847	RM20091963742	RM20091960872	RM20091964861	RM20091962537	RM20091962061	RM20091964453	RM20091962469		RM20091962999			RM20091965540	OMM1532		RM20091964342
RM20091961090	RM20091962065	RM20091962722	RM20091963911	RM20091962951	RM20091965615	RM20091960434	OMM5176	RM20091963385	RM20091964113	RM20091963987	RM20091960849	RM20091964369	RM20091961353	RM20091965572	RM20091962614	RM20091964656	RM20091964732	RM20091963346		RM20091963415			RM20091965688	OMM3144		RM20091964426
RM20091960187	RM20091962246	RM20091962738	RM20091965772	RM20091963419	RM20091965910	RM20091960719	OMM1295	RM20091963436	RM20091964469	RM20091964065	RM20091961889	RM20091965156	RM20091962244	RM20091960153	RM20091962796	RM20091961390	RM20091965685	RM20091964748		RM20091963560			RM20091960732	OMM5065		RM20091964545
RM20091964617	RM20091962427	RM20091963497	RM20091965951	RM20091963768	RM20091960225	RM20091961625	RM20091960196	RM20091963467	RM20091965271	RM20091964409	RM20091962540	RM20091965693	RM20091963882	RM20091961420	RM20091962815	RM20091963117	RM20091964078	RM20091965014		OMM1036			RM20091961212	RM20091963427		RM20091964549
RM20091965645	RM20091962693	RM20091963814	RM20091960670	RM20091964560	RM20091960293	RM20091961634	RM20091960373	RM20091963618	RM20091965769	RM20091964615	RM20091962848		RM20091964804	RM20091962637	RM20091962853	RM20091964796	RM20091961963	RM20091960154		OMM1444B			RM20091964140	RM20091960145		RM20091964854
RM20091960580	RM20091962743	RM20091964516	RM20091961816	RM20091960116	RM20091960742	RM20091962002	RM20091960448	RM20091963731	OMM1107	RM20091964822	RM20091963171		RM20091965638	RM20091964024	RM20091963313	RM20091965106	RM20091965579	RM20091962812		RM20091963283			RM20091965868	RM20091960414		RM20091965161
RM20091960706	RM20091962802	RM20091965007	RM20091960871	RM20091962168	RM20091964658	RM20091962188	RM20091960529	RM20091963847	RM20091960532	RM20091965046	RM20091963615		OMM1312	RM20091964451	RM20091963980	RM20091965152	RM20091963923	RM20091960311		RM20091963464			RM20091964309	RM20091960416		RM20091965373
RM20091961008	RM20091962847	RM20091965169	RM20091961359	RM20091963043	RM20091965119	RM20091962390	RM20091960735	RM20091964165	RM20091960557	RM20091965401	RM20091965387		ONEU8	RM20091965548	RM20091964193	RM20091960028	RM20091964299	RM20091960658		RM20091964611			RM20091960959	RM20091960490		RM20091965478
RM20091961021	RM20091962914	RM20091965367	RM20091962813	RM20091964480	RM20091965502	RM20091962635	RM20091960757	RM20091964179	RM20091965232	RM20091965507	RM20091960128		RM20091961696	RM20091961173	RM20091964439	RM20091960185	RM20091962880	RM20091960695		RM20091964280			RM20091963559	RM20091960648		RM20091965488
RM20091961573	RM20091963129	RM20091962012	RM20091963098	RM20091964770	RM20091960148	RM20091962649	RM20091961128	RM20091964348	RM20091961795	RM20091965752	RM20091960247		RM20091961833	RM20091963078	RM20091964473	RM20091960540	RM20091964826	RM20091960890					RM20091964552	RM20091960722		RM20091965557
RM20091962028	RM20091963240	RM20091962488	RM20091964534	RM20091961485	RM20091964183	RM20091962850	RM20091961452	RM20091964697	RM20091963312	RM20091965924	RM20091961369		RM20091962881	RM20091960689	RM20091964567	RM20091962053	RM20091963602	RM20091960937					RM20091960590	RM20091960783		RM20091965657
RM20091962461	RM20091963251	RM20091963897	RM20091964960	RM20091963266	RM20091964232	RM20091963050	RM20091962476	RM20091965276	RM20091963545	OMM1313	RM20091962020		RM20091964649	RM20091961116	RM20091964652	RM20091962758	RM20091964218	RM20091961157					RM20091964622	RM20091961073		RM20091960685
RM20091963994	RM20091963258	RM20091965628	RM20091963038	RM20091965518	RM20091965604	RM20091963569	RM20091962509	RM20091965428	OMM1134B	OMM1433	RM20091962422		RM20091964927	RM20091961466	RM20091965185	RM20091964556	SSA119NVH	RM20091961600						RM20091961127		RM20091961233
RM20091965116	RM20091963353	OMM1599	RM20091960102	OMM1774	RM20091965765	RM20091963587	RM20091962875	RM20091965665	RM20091964573	OMM1619	RM20091962512		RM20091965806	RM20091964682	RM20091965269	RM20091964791	RM20091960095	RM20091961846						RM20091961789		RM20091962095
RM20091961622	RM20091963565	RM20091960897	RM20091965876	RM20091960326	RM20091960687	RM20091964592	RM20091963022	RM20091965682	RM20091960626	OMM1375	RM20091963948		RM20091964616	RM20091960904	RM20091965297	RM20091964897	RM20091963715	RM20091962226						RM20091961898		RM20091964334
RM20091961645	RM20091963692	RM20091963664	RM20091965351	RM20091961393	RM20091963417	RM20091964777	RM20091963214	RM20091965744	RM20091961441	RM20091962431	RM20091964303		RM20091961216	RM20091961354	RM20091965828	RM20091965874	RM20091960541	RM20091963348						RM20091962021		RM20091961924
RM20091964544	RM20091964136	RM20091963667	RM20091965155	RM20091962871	RM20091963979	RM20091965573	RM20091963387	RM20091965787	RM20091961680	RM20091960135	RM20091961289		RM20091962060	RM20091961712	OMM5133	RM20091960546	RM20091961046	RM20091963793						RM20091962184		RM20091963871
RM20091964705	RM20091964147	RM20091962195	RM20091961942	RM20091964566	RM20091960004	RM20091965860	RM20091963683	RM20091965795	RM20091964073	RM20091961539	RM20091963374		RM20091962289	RM20091964333	OMM5281	RM20091961804	RM20091962636	RM20091964508						RM20091962980		RM20091962017
RM20091961399	RM20091964266	RM20091960232	RM20091960345	RM20091964642	RM20091960283	OMM1155	RM20091964018	RM20091964559	RM20091964103	RM20091961875	RM20091960721		RM20091962942	RM20091964448	RM20091961377	RM20091962022	RM20091964198	RM20091965088						RM20091963009		RM20091963725
RM20091962648	RM20091964629	RM20091960286	RM20091960661	RM20091961819	RM20091960391	OMM1662	RM20091964651	RM20091960258	RM20091965062	RM20091961995	RM20091965742		RM20091963761	RM20091965239	RM20091962477	RM20091962321	RM20091964562	RM20091965194						RM20091963082
RM20091962830	RM20091964716	RM20091960366	RM20091960905	RM20091962555	RM20091960854	RM20091961325	RM20091965073	RM20091962630	RM20091961461	RM20091962506	RM20091965210		RM20091965174	RM20091961935	RM20091963777	RM20091962781	RM20091965564	RM20091965792						RM20091963202
RM20091960796	RM20091965022	RM20091960812	RM20091960999	RM20091965218	RM20091961039	RM20091964256	RM20091965588	RM20091964717	RM20091961937	RM20091962791	RM20091963596		RM20091965703	RM20091962891	RM20091965889	RM20091963349	RM20091965760	RM20091960715						RM20091963281
RM20091961891	RM20091965097	RM20091961981	RM20091961106	RM20091960403	RM20091961187	RM20091965004	RM20091965751	RM20091965472	RM20091962492	RM20091963441	RM20091962525		RM20091963458	RM20091963278	RM20091961897	RM20091963378	RM20091964832	RM20091962147						RM20091963669
RM20091962902	RM20091965254	RM20091962558	RM20091961286	RM20091961588	RM20091961385	RM20091965058	RM20091965777	RM20091961063	RM20091962522	RM20091960425	RM20091962626		RM20091964564	RM20091964684	RM20091962051	RM20091964441	RM20091963770	RM20091963328						RM20091964171
RM20091963143	RM20091965284	RM20091962935	RM20091961629	RM20091962878	RM20091961516	OMM1158	RM20091960602	RM20091963491	RM20091962692	RM20091961155	RM20091963478		RM20091965726	RM20091965553	RM20091962373	RM20091964785	RM20091961571	RM20091965516						RM20091964302
RM20091964523	RM20091965347	RM20091963105	RM20091962315	RM20091965451	RM20091962539	OMM1513	RM20091961101	RM20091962755	RM20091964337	RM20091962036	RM20091965236		RM20091961852	RM20091963163	RM20091964835	RM20091965167	RM20091961396	RM20091962083						RM20091964317
RM20091964498	RM20091965598	RM20091964445	RM20091963113	RM20091965797	RM20091962936	OMM5233	RM20091964964	RM20091964995	RM20091965378	RM20091962137	RM20091962050		RM20091962007	RM20091963599	OMM1221	RM20091961926	RM20091964870	RM20091963147						RM20091964321
RM20091962510	RM20091965648	RM20091964459	RM20091964074	RM20091964867	RM20091963040	OMM1056	RM20091961226	OMM5090	RM20091961699	RM20091963395	RM20091963784		RM20091963481	RM20091964952	OMM1362	RM20091962393	RM20091962098	RM20091964093						RM20091964438
RM20091965600	RM20091965766	RM20091964618	RM20091964248	RM20091962740	RM20091963093	OMM1234	RM20091960210	RM20091964274	RM20091962267	RM20091963774	RM20091961094		RM20091964546	RM20091960248	RM20091962312	RM20091962859	RM20091963408	RM20091961076						RM20091964449
RM20091962128	RM20091965920	RM20091964760	RM20091965802	RM20091965908	RM20091963331	RM20091960737	RM20091963744	RM20091961206	RM20091964181	RM20091963778	RM20091961976		RM20091964973	RM20091962703	RM20091964226	RM20091964484	RM20091965915	RM20091960048						RM20091964547
RM20091962734	OMM1131	RM20091961985	RM20091960072	RM20091962752	RM20091963358	RM20091960798	RM20091961322	RM20091961978	RM20091963709	RM20091964350	RM20091965171		RM20091965312	RM20091963940	RM20091961613	RM20091960275		RM20091960299						RM20091965102
RM20091963909	OMM1573	RM20091962937	RM20091960611	RM20091963456	RM20091964028	RM20091963889	RM20091962432	RM20091962544	RM20091965620	OMM1333	RM20091964054		RM20091965856	RM20091961129	RM20091961646	RM20091961517		RM20091961668						RM20091965249
RM20091964118	RM20091963309	RM20091962992	RM20091963271	RM20091963588	RM20091964763	RM20091963902	RM20091964769	RM20091964677	RM20091965630	RM20091962087	RM20091960236		RM20091961720	RM20091960807	RM20091961983	RM20091963488		RM20091962030						RM20091965259
RM20091964353	RM20091963592	RM20091961108	RM20091963886	RM20091963600	RM20091965203	RM20091962514	RM20091965727	RM20091965882	RM20091960042	RM20091962619	RM20091964370		RM20091961771	RM20091961169	RM20091961676	RM20091965217		RM20091963885						RM20091965614
RM20091965354	RM20091964813	RM20091961253	RM20091965228	RM20091962005	RM20091960710	RM20091963412	RM20091960189	OMM1089	RM20091963687	RM20091960261	RM20091962170		RM20091962116	RM20091964357	RM20091961836	RM20091965807		RM20091960891						RM20091965737
RM20091960723	RM20091965647	RM20091961659	RM20091965880	RM20091965077	RM20091962092	RM20091964887	RM20091960291	BX082639	RM20091965514	RM20091961805	RM20091962686		RM20091963898	RM20091964940	RM20091960910	RM20091962310		RM20091962716						RM20091965788
RM20091961095	RM20091963031	RM20091962478	OMM1408	RM20091962365	RM20091962719	RM20091960415	RM20091960756	RM20091960097	RM20091961134	RM20091962231	RM20091965550		RM20091965230	RM20091965853	RM20091963539	RM20091962487		RM20091964228						RM20091960184
RM20091961283	RM20091960664	RM20091963638	RM20091964985	RM20091960418	RM20091963748	RM20091963621	RM20091962520	RM20091960430	RM20091961561	RM20091962536	RM20091965025		RM20091960801	RM20091960073	RM20091964634	RM20091963594		RM20091964749						RM20091960314
RM20091961455	RM20091960922	RM20091964205	RM20091960458	RM20091961180	RM20091964225	RM20091964520	RM20091964325	OMM1270	RM20091962518	RM20091963846	RM20091964042		RM20091964884	RM20091960127	RM20091965403	RM20091963668		RM20091965195						RM20091960582
RM20091961508	RM20091962156	RM20091965336	RM20091960553	RM20091962124	RM20091965756	RM20091961522	RM20091961719	RM20091962354	RM20091961735	RM20091964016	RM20091965866		RM20091960761	RM20091961304	RM20091960320	RM20091963926		RM20091965633						RM20091960748
RM20091961975	RM20091962556	RM20091965745	RM20091962876	RM20091965474	RM20091965851	RM20091962547	RM20091961235	BX310634	RM20091963489	RM20091964307	RM20091964110		RM20091962037	RM20091962760	RM20091961315	RM20091964783		RM20091961465						RM20091960777
RM20091962356	RM20091962652	RM20091961467	RM20091963463	OMM3111	RM20091960911	RM20091964052	RM20091960929	RM20091962567	RM20091963025	RM20091964814	RM20091965315		RM20091963762	RM20091964997	RM20091961370	RM20091965814		RM20091963765						RM20091962237
RM20091962382	RM20091962964	RM20091963150	RM20091963471	RM20091965643	RM20091964178	RM20091965538	RM20091960942	RM20091965021	RM20091964851	RM20091965177	RM20091962664		RM20091965890	OMM1669	RM20091962249	RM20091960790		RM20091962182						RM20091962414
RM20091963029	RM20091963636	RM20091963519	RM20091963549	RM20091960814	RM20091964603	RM20091961903	RM20091961583		RM20091960253	RM20091965193	RM20091964397		RM20091960468	RM20091963985	RM20091963479	RM20091961782		BX319411						RM20091962985
RM20091963650	RM20091964126	RM20091964079	RM20091962590	RM20091960894	RM20091964714	RM20091963916	RM20091962342		RM20091962831	RM20091965521	RM20091965117		RM20091962343	RM20091965939	RM20091960046	RM20091962112		OMY1177B						RM20091963527
RM20091964601	RM20091965673	RM20091965755	RM20091965960	RM20091961268	RM20091964795	RM20091965450	RM20091964081		RM20091964703	RM20091965846	RM20091963300		RM20091965012	RM20091960887	RM20091960181	RM20091962361		RM20091960074						RM20091964435
RM20091965555	RM20091965707	RM20091964830	RM20091965746	RM20091961430	RM20091965385	RM20091965044	RM20091964818		RM20091965268	RM20091960240	RM20091963085		RM20091965661	RM20091965549	RM20091960254	RM20091962560		RM20091964332						RM20091964745
RM20091960113	RM20091965763	RM20091960561	RM20091961276	RM20091961575	RM20091960297	RM20091965118	RM20091960511		OMM5267	RM20091962578	RM20091963450		RM20091960519	RM20091962835	RM20091961042	RM20091963797		RM20091960089						OMM3076
RM20091962882	RM20091960175	RM20091960688	RM20091962704	RM20091963758	RM20091961503	RM20091960779	RM20091960632		OMY1000UW	RM20091962683	RM20091963790		RM20091962794	RM20091960357	RM20091961732	RM20091964330		RM20091960305						RM20091962409
RM20091963064	RM20091960234	RM20091965424	RM20091960239	RM20091964210	RM20091961560	RM20091964406	RM20091961185		OMM1451	RM20091963924	RM20091960356				RM20091962497	RM20091965253		RM20091960758						RM20091964450
RM20091963663	RM20091960682	RM20091962103	RM20091961701	RM20091965285	RM20091961733	RM20091960856	RM20091961811		RM20091961481	RM20091965631	RM20091961191				RM20091964216	RM20091965624		RM20091960780						RM20091964993
RM20091965617	RM20091961124	RM20091965811	RM20091963177	RM20091961890	RM20091964596	RM20091963363	RM20091962046		RM20091961292	RM20091962541	RM20091964282				RM20091960364	RM20091960267		RM20091961080						RM20091963858
RM20091960443	RM20091962689	RM20091960536	RM20091963740	RM20091964004	RM20091965658	RM20091963420	RM20091962589		RM20091962586	RM20091964407	RM20091961146				RM20091962829	RM20091961327		RM20091961620						RM20091961347
RM20091960483	RM20091963635	RM20091960763	RM20091964758	RM20091961525	RM20091960365	RM20091964338	RM20091962900		RM20091963601	RM20091960303	RM20091965637				RM20091965867	RM20091961521		RM20091961801						RM20091961440
RM20091960686	RM20091962069	RM20091961828	RM20091965382	RM20091963041	RM20091960484	RM20091965350	RM20091964739		RM20091964344	RM20091960653	RM20091965881				RM20091960442	RM20091963273		RM20091962701						RM20091962181
RM20091960967	RM20091965618	RM20091961865	RM20091965849	RM20091963061	RM20091964514	RM20091960810	RM20091961114		RM20091965815	RM20091963207	RM20091963409				RM20091963396	RM20091964009		RM20091964653						RM20091964846
RM20091961459	RM20091961305	RM20091963086	RM20091960804	RM20091965349	RM20091960683	RM20091964490	RM20091963990		RM20091960718	RM20091964472	RM20091961787				RM20091964418	RM20091964062		BX873975A						RM20091965345
RM20091961597	RM20091961387	RM20091964858	RM20091962064	RM20091965833	RM20091961188	RM20091964726	RM20091964403		RM20091960040	RM20091965487	RM20091964176				RM20091964402	RM20091964488		BX873975B						RM20091965809
RM20091961840	RM20091962176	RM20091965784	RM20091960400	RM20091961501	RM20091964290	RM20091961424	RM20091965790		RM20091961973	RM20091965719	RM20091961574				RM20091960309	RM20091965036		OMY1177A						RM20091960024
RM20091961848	RM20091962324	RM20091964102	RM20091960466	RM20091962455	RM20091962314	RM20091963206	RM20091965830		RM20091962417	RM20091960092	RM20091965314				RM20091960819	RM20091965086		RM20091961274						RM20091961194
RM20091961971	RM20091962720	RM20091965453	RM20091961843	RM20091963371	RM20091961142	RM20091965166	RM20091960503		OMM1257	RM20091962661	RM20091964569				RM20091962430	RM20091961288								RM20091962111
RM20091962325	RM20091962863	RM20091960606	RM20091960497	RM20091963827	RM20091963690	RM20091963657	RM20091961171		RM20091962221	RM20091962895	RM20091960323				RM20091962974	RM20091961558								RM20091962287
RM20091962386	RM20091963153	RM20091961030	RM20091960548	RM20091964263	RM20091964271	RM20091963925	RM20091961849		RM20091965771	RM20091963080	RM20091962483				RM20091963581	RM20091961647								RM20091963345
RM20091962765	RM20091963452	RM20091961402	RM20091960585	OMM1516	RM20091964019	OMM1740	RM20091964535		RM20091962957	RM20091963699	RM20091963067				RM20091961345	RM20091961969								RM20091964036
RM20091963063	RM20091964647	RM20091961498	RM20091960771	RM20091961314	RM20091964479	RM20091964443	RM20091960274		RM20091962213	RM20091962997	RM20091964378				RM20091962125	RM20091964142								RM20091964639
RM20091963301	RM20091964868	RM20091961542	RM20091961727	RM20091964374	RM20091965256	RM20091964916	RM20091965531		RM20091962979	RM20091963279	RM20091963437				RM20091962230	RM20091964708								RM20091964910
RM20091963377	RM20091965964	RM20091961726	RM20091962024	RM20091963661	RM20091961885	RM20091961641	RM20091965606			RM20091963322	RM20091961827				RM20091962489	RM20091960712								RM20091962175
RM20091963906	RM20091961363	RM20091961757	RM20091962601	RM20091965352	RM20091962072	RM20091964415	RM20091965660			RM20091960562	RM20091963035				RM20091961121	RM20091961736								RM20091965941
RM20091964506	RM20091961662	RM20091962702	RM20091962681	RM20091960638	RM20091963942	RM20091960494	RM20091961505			RM20091961722	RM20091963677				RM20091961177	RM20091962645								BX881655
RM20091964510	RM20091962042	RM20091964691	RM20091963305	RM20091964877	RM20091964698	RM20091963060	RM20091962355			RM20091960884	RM20091964595				RM20091965279	OMM1306								RM20091960906
RM20091965134	RM20091963627	RM20091964775	RM20091963317	RM20091962172	RM20091960212	RM20091965942	RM20091961439			RM20091961200	RM20091965017				RM20091963186	RM20091961906								RM20091964262
RM20091965208	RM20091964896	RM20091964850	RM20091963582	RM20091964797	RM20091965439	RM20091962146	RM20091963459			RM20091961208	RM20091965360				RM20091964983	RM20091963739								RM20091960943
RM20091965562	RM20091961306	RM20091965170	RM20091963625	RM20091962203	RM20091963641	RM20091962462	RM20091963771			RM20091961423	RM20091960056				RM20091960149									RM20091961168
RM20091965822	RM20091962380	RM20091965353	RM20091960399	RM20091963779		RM20091962718	RM20091962712			RM20091961635	RM20091960108				RM20091962647									RM20091961425
RM20091962010	RM20091962955	RM20091965396	RM20091960797	RM20091960778		RM20091962824	RM20091961167			RM20091962062	RM20091960173				RM20091960359									RM20091960817
RM20091962284	RM20091960023	RM20091965732	RM20091961570	RM20091964394		RM20091963845	RM20091961881			RM20091962632	RM20091960300				RM20091961682									RM20091962391
RM20091963026	RM20091963943	RM20091964898	RM20091963039	RM20091964837		RM20091965404	RM20091964613			RM20091963604	RM20091960786				RM20091962077									RM20091963306
RM20091963155	RM20091961317	RM20091964002	RM20091963168	RM20091964503		RM20091961831	RM20091965713			RM20091963785	RM20091963215				RM20091961812									RM20091963511
RM20091964197	RM20091960977	RM20091964774	RM20091965226	RM20091964591		RM20091962772	RM20091960372			RM20091964111	RM20091964222				RM20091961378									RM20091963532
RM20091964212	RM20091962023	RM20091965810	OMM1194	RM20091963628		RM20091960696	RM20091963522			RM20091964707	RM20091964871													RM20091964529
19NUIG	RM20091964124	RM20091961418	RM20091961962	RM20091964029		RM20091961356	RM20091964097			RM20091964948	RM20091965035													RM20091965710
RM20091960180	RM20091965089	RM20091964217	RM20091961147	RM20091964751		RM20091964687	OMM1109			RM20091965464	RM20091965567													RM20091960487
RM20091960474	RM20091965762	RM20091963796	RM20091963629	RM20091964202		RM20091960265	RM20091960635			RM20091960950	RM20091965636													RM20091962338
RM20091960578	RM20091960394	RM20091961704	RM20091963651	OMM1075		RM20091964001	RM20091960453			RM20091963806	RM20091965844													RM20091962034
RM20091965065	RM20091961821		RM20091965090	RM20091964339		RM20091964645	RM20091964023			RM20091960411	RM20091960158													RM20091961707
RM20091965722	RM20091962301		RM20091963079	RM20091963901		RM20091961446	RM20091960241			RM20091961241	RM20091960870													RM20091963329
RM20091965779	RM20091962486		RM20091964734	RM20091960100		RM20091960485	RM20091960948			RM20091961917	RM20091961018													RM20091961007
RM20091965414	RM20091963185		RM20091964951	RM20091964965		RM20091961050	RM20091961033			RM20091962673	RM20091961062													RM20091964944
RM20091962912	RM20091963890		RM20091963148	RM20091965384		RM20091961541	RM20091961373			RM20091962978	RM20091961432													RM20091963451
RM20091965238	RM20091960161		RM20091965419			RM20091964008	RM20091961823			RM20091964349	RM20091964454													OMM3142
RM20091965583	RM20091960882					RM20091965541	RM20091961914			RM20091962837	RM20091964895													RM20091961412
RM20091965296	RM20091962613					RM20091962659	RM20091961931			RM20091963741	RM20091965223													RM20091963934
RM20091965388	RM20091963713						RM20091962161			RM20091961604	RM20091961939													RM20091965780
RM20091960680	RM20091961051						RM20091962646			OMM1708	RM20091960370													RM20091965400
RM20091963502	RM20091963474						RM20091962858			RM20091960183														RM20091960525
RM20091961526	RM20091965115						RM20091962968			RM20091962668														RM20091961088
RM20091964003	RM20091963506						RM20091963119			RM20091962302														RM20091960202
RM20091964968	RM20091964295						RM20091963734			RM20091961961														RM20091960256
RM20091960852	RM20091963010						RM20091964031			RM20091964660														RM20091960563
RM20091963315	RM20091963707						RM20091964043			RM20091960045														RM20091962199
RM20091964824	RM20091963746						RM20091964817																	RM20091963276
RM20091964055	RM20091962498						RM20091965328																	RM20091963344
RM20091964736	RM20091961091						RM20091965495																	RM20091963721
RM20091964056	OMY1INRA						RM20091965666																	RM20091963732
RM20091961053	RM20091960978						RM20091962972																	RM20091964037
							RM20091961830																	RM20091964237
							RM20091964163																	RM20091964610
							RM20091961486																	RM20091965100
							RM20091963808																	RM20091965200
							RM20091962372																	RM20091965808
							RM20091962459																	RM20091960382
							RM20091963070																	RM20091962080
							RM20091963287																	RM20091964135
							RM20091965240																	RM20091964755
																								RM20091965024
																								RM20091964509

## Sheet: 3) RAD SNP Sequences
RAD SNP ID Fam 2009196	Seq
RM20091960001_66CT	TTGAGAACCAGGCGTGGTTGCAAAAGGATACTGCACAAATAGGTTAGGTACCACCAAAATCTATA[C/T]GCAACATGTAGTGTT
RM20091960002_75CT	TCACCATTGTACATGCCACAAATGAATGTGTATATACTGGAATTACACTATGAACCTGTTACTGTCTGATTTAC[C/T]TATCAT
RM20091960003_61AG	TAGCATTTCGGGGCTGAGGAGATGAGGAGCAGGAGCTAATGAGAACACTTTCAGGCCTCA[A/G]TGTAACCTTGACCTAGAGAG
RM20091960004_51CT	GAGTTCAATAACTACAGGCAGATAGATGTATGGTGAGATGCCGGATGAAG[C/T]GTTGAATAGGTCAGTAGCCTACAGTGTAAT
RM20091960005_40AC	ACAGCACAGTCAGGAATGGGATCAGGCCTGGACAAGACC[A/C]TGATTAGGGCCAGGAGTTTCACCAGACTTGATCAGGGAAAA
RM20091960006_70CT	CCTCACACATAAACCATCACAGGGAGTTAGGCTTTGGAAGAGGAGAGATGAGAAATAGAGAAGGGGATG[C/T]GATAGGAGATA
RM20091960007_15GT	TGAAATAAGGCTAC[G/T]CTTTGTTTACTGTTGTGCCATCAGATAATAGCATCTTATGCTTTCGCTGAAAAGCCTTTTTGAAAT
RM20091960008_73AG	CCCGGGGGCTCCCAGGATCACAACACTGTCCACAGCCTCCAGAGGTCATACACGCACACCAGCTGGAGAGAG[A/G]GGGGAGGG
RM20091960009_49GT	GCTCCGTTCTCTCCCTCCACCGGCTCTCTACCCGCCTTGTTTCCCACT[G/T]TATTCATTAACTTTACTCACTGCCTTCACACT
RM20091960010_68CT	TGAAATATGCTTTTCTCCCTTTGTTTACGGAGGTGCTATCTTCAGATAATAGCATCATTTGCTTTCG[C/T]TAGCGTCCCACAT
RM20091960011_21AT	AAAGAAGAGAGATTGTTTAA[A/T]TTTGTGACAATGCAGGAGTTGTGCATGGCTTCAGCACATCGCATGCAGTGTGGGTACAGG
RM20091960012_39AC	CAATACATTATTCAAATGTTGCTATACAGAGTCAAGTT[A/C]CAAATTCAATATCTGTGACTAATGGAATGGGGGTTGCAGAAT
RM20091960014_79AG	AGAGACGGTCAAACATGAGGCAGGAGCACAGGAAACAGTTGGAGGAGATCCTGGAAATGAAGTATGCCACAGGAAATC[A/G]CA
RM20091960015_6AG	TGCAC[A/G]GCCTGCATATAAAATGGTAATGGGGACAGAAAGACACAAAGCACTGTTTGGGTGCTGTGCTCATGAAAGGCCCCA
RM20091960016_4AG	CGG[A/G]TTTTTTCGTTGTTGGAAAGAGGGATGGGAGATTATGTCCCTTTATCGATTACCGGGGTTTAAATAACATTACCATCG
RM20091960017_39AG	GCGTCCCCTTGGTGACGACTTCGCACCATAAAACAAAC[A/G]AAGTGCTCCACAGCACAGAGAGATCTAAATCAAACTGTATGT
RM20091960018_45AG	CTCAAAGGTGGGCCGCTCCTCGGCGTCCTTCCTCCAGCAGGTCA[A/G]CATGAGGTCGTGGAGGGACTCAGGGCACTCAGCTGG
RM20091960019_81AG	AAGGACTATTTGACCAAGAAGGAGAGTAATGGAGTGCTGCATCAGATGACATGGCCTCCACAATCACCCGAACTCAACCC[A/G]
RM20091960020_80GT	GTGGGCCTCTACTCCTGTGTGCTACGGTAAGACAGGAGGGACATAGTCTACTCTAGTCTACTCCTGTGTGCTACCGTAA[G/T]A
RM20091960021_4CT	ATT[C/T]ATTCCTATTACATAATACTGTGCTGCTGCCACGCTGCTAAACACACAGGGAATCACTGAGTGCTGTAGAGAGCCTCA
RM20091960023_68AT	CTGTGGGCTCCAGAGGCGGTTAGGGTTTAGAGGCAAGCGGGGGAGAGGACTGGACATTCAGCCAGGG[A/T]CTGTGACCCCTTT
RM20091960024_54CT	TGAAATATGATTTCTCTCTTTGTTTACGGAGGTGCTATCTCAGATAATAGCAT[C/T]GTTTGCTTTCGCCGAAAAGCCTTTTTG
RM20091960025_8CT	TTGAACT[C/T]ACAACCATGGCATTGCTAGCTTTACACTCTTACCACACAAACCAGGGTGATTGTTGTTGTTGTTGTTATCGGT
RM20091960026_24CT	TTACGAGTATACTCTCAGACGCG[C/T]CGCAATTAAGTTTTTCTTTCGAGAACCGGCTTGTTATCTCTGGGAAAAGCTCAAACC
RM20091960027_4AG	ATT[A/G]AAGTCAAAACACAGAAACCGCACTGTCTGCTTCCTCAACATTTCCGCACTCTCTTCAGCATTTCTTTCCTCTACAAC
RM20091960028_61AT	TGCAATACCAACGCGAGGACTCAATATGACTTATTGGAATATTATTAGGCCCTTTATTAA[A/T]CTGCCGTGCGGCGCCCGTCT
RM20091960029_39AG	ACCCAGCCTACCGTTGGAATGAACTTCAAAACACCCAG[A/G]GGAGTCTAGACACGTTTCATATCGCTGTCAATAAAGACAAGT
RM20091960030_74AG	TGTTCTCCACGTACTCATCGTTTGCCAAAGCAACTCAATATGTTTTTGTAATCTGCAGGTTATATGCACTCCC[A/G]TATGGTA
RM20091960031_27AT	AAGTGTTTTCTCCCCGCAAAAAAATT[A/T]TCATCCACATTACGGCACTGAAGAATCAACTAAATTTGAGCCTTAAAACAGTGG
RM20091960033_47CT	AGGTACAGGATGGCAACAACAACTGCCCGATTTACACCAGGAAGCA[C/T]AATCACTCTATCACTGCTCAGACTGTCTGCAATA
RM20091960035_32AT	GCTGTCCCCTGGCAGGCTGGGCCGACTTAAG[A/T]CAATGAGCATGGCAGAATGGGCTCCAACCCACAATAGAACCAGGAGCCC
RM20091960036_19CT	CCTCCAGGCCGCCCATGG[C/T]GAGTTTATTTGGCTCCTCTTTCACCTCTTTTCATTCACTCTTTCTCTTTTAAGTGGCTGCGA
RM20091960037_12AG	GTGTAAGGGCT[A/G]TTTAACGAAGGAGAGTGATTGAGTGCTGCATCAGATGACCTGGCCTCCACAATCACCCGACCTCAACCC
RM20091960038_64GT	ATCTCACTCAGACAAATCACATTTGTTCTTTCCCAAAAATGTATTCAAAACCGTGCCTTAGCT[G/T]TAATTCCTTTCTGTAGG
RM20091960039_10CT	GTTTGTCCG[C/T]CATTTCCTGGGATGGCAGAACCTCTTACTTCAAGTCTTATGAGAGGAGATGGAGAAACAGCCACCGCTGCA
RM20091960040_42CT	CCGTCCCCGGTGGGAACCCCCTCCTTTAGCCGCCAGCATTT[C/T]TCCCCTCACCCCTGGAGCGCCTCCACCTCCAGTAAGAAC
RM20091960041_77CT	GAGTTCAATAACTACAGGCAAATGTATGGTGAGATGCCGGAGTAAGCTTTCAAAAGGTCGGTAGCCTACAGAGTAA[C/T]ATGA
RM20091960042_46AG	GAGGTTAGAGAATAGACTTTACAAACATGGCAGAGAATTCTACAT[A/G]TGGAGTTTTTTCAGTCTATTACCTGGTCAAGTTCA
RM20091960043_40AG	AGTTAAATGCTCCCAGAGAGATTAATGAGCCTTAGTCTC[A/G]GCCCAGACCTGTTAAACGATCACAGAAAAATGAATGGCTTC
RM20091960044_18GT	TCCTCAGTAGACGGTCC[G/T]CAGATGAAGTGCTGAACAAGAGCATAGTTACTTGTTTTCTCTTCTTCACGGTTTCTATTTTCG
RM20091960045_76CT	CACGTACTAGGATGGTAACAATACCACACACAGACATACCTCTGAGGACGATCTGTGATATCTACAGCCTTCATG[C/T]AACAT
RM20091960046_52CT	GCACAGGTTCAGGACTAGACTGGCAGCGCTGGAATCCTCTTCCTCTGGGTT[C/T]GGCAGCACCTCTCCCCTCTCCCTGAAGCT
RM20091960048_45CT	TACTAGCTAACATGCAATCATTGGAAAATAAAATCGACGAGCTA[C/T]GAGGAAGATTAAACTACCATCGGGACATTAAAAACA
RM20091960049_45CT	GAAAGGAGGAGGTGCAGCTCAGACAACAAGTCAACCAGATGTTA[C/T]CCAATGACCTCAGGATGGGGAGGCACAATGCTTCAT
RM20091960050_9CT	CCTAAAGT[C/T]CTTCCAATCTGGTTAACTCTCCCCTTCCACCTCCAGTGCTGCATCTCCCCTCCACTGTCTAGCCCTTTAACA
RM20091960052_8CG	TGAATGT[C/G]ACATGATGGCAGCGTATCTCATTCACGGGAAATGTGTCATTCCCTGGTCTTGTCCCCGATAGTGTACGATCCA
RM20091960053_46AC	GGCAGCTCCCTGGTCTTCATACCAGCGCTTCCTCCACCGTAGGCA[A/C]TGTGCTGAGTAAACAGTACTGGTAACACTGCAGCC
RM20091960055_66AG	ACAAGGGGTTAAAACATACCAACAGAGACTGTAGCTAAAAACTGTCTCTTTACCATCATCCATCC[A/G]TCTTTCTGTCCTCTA
RM20091960056_77AG	ACAACACCCGCTCCTCCAGTCAAGAGAGGATGAGAAGAGAAAGGACAATGGAGGGGGGAATAGGGAGGGAGTGAAA[A/G]AGTG
RM20091960058_69AG	ATGTGGTGTGAGAACAGGCTGTTTTTCTCTGCTGTTTCTTTCCTCCCCTGCTGTCTGACTTAGAGGTA[A/G]AGCTAGTCAGAG
RM20091960060_62GT	ATGTTTAGTTCCCACTTTGTTCCAAAGACGTTTTTAGGACATTCTTAGAATGTTGTGTCAT[G/T]GTGCCCTGGAGGTTTTTGT
RM20091960061_78AG	CAAAGCAGACCAATGACCAGACCAGAACCAAAACCACCACCCTCCATCTGAACAAGAGTGGTGCGCCACTACAACAT[A/G]GTG
RM20091960062_25CG	AACTGGTGGACATTGCTGGAAATA[C/G]CAGTAAAAGCATAGTGCCTCAAATTGCCCAAACCTCCTGTCCCTATGCACACACCT
RM20091960063_71AG	ATGACAAAACGTTAGACTCAGATTTCGGAGGTCACAGGGTTCTGGCAGTGATGCGACCCCCTGCCTGTCC[A/G]CTCCAATCTG
RM20091960064_79AG	TACCAGACAGGAGTCACTTTTAGTAGACGCCCAAACAGAAAAACGGTTGGAAAAGGGACAGATACCATCTCAACGCTC[A/G]TT
RM20091960066_43CT	GTCACCATCATTCCACTGCCTGTAATGGCAGATTGGCTACAG[C/T]ACTAGTTCCGCTCTTATTATGGTATGATTCCCTGAAAT
RM20091960068_9CG	ACCGGCGC[C/G]ATGGACCACGGCACGGTGACGTATGTCACACTTCCTTCCCTGTTGTGCTCTGTCGTTACTCCCATTGCTGCC
RM20091960071_5AG	CAGG[A/G]ATGTGCATTCCAGCACAAGCTAGAGCTGGGTTGTGGATCTTGATTAGTAGGAGATGGGAAATCTGCAGGCAAGAAG
RM20091960072_34GT	CCTTTTCCCCCCACCACCTTTACAACACTGAAT[G/T]CTGTCACGATACCCCGATGAAGACGGCTTGCTGTCACGATACCCCGA
RM20091960073_12CT	ATCAGTCAGGC[C/T]ATCCGAGATGTGCTCAAGAAGAGGGTGAGCTGACACAAACCAAGCCTGAGTGCTCTTCACAGACAGGAT
RM20091960074_78GT	TTACTTGTTGTATCATGAAACCACCTTAGGTTTCCTCATGTTTCCTTTGTGAGCTTGTTATGTTTCAGTTTGTTGTT[G/T]ATA
RM20091960075_65CT	GCTCTGTCCTGTCTGTGTCTGGCCCTGCAACAACCCTGTGTCTGGAACACACTGTCTACAGCCC[C/T]GTACAAAACACACACC
RM20091960076_9CT	TCTTTGTT[C/T]ATCTTTGAAATGCTTTCTCACAGACCCCCCATTTCTTAATAAGAGGCAGAGACTTAGACTGTGGAACAATTC
RM20091960078_67CT	CATCTTGACATGACCCTCCAGCATGACAATGCCACCACACACAGAACGAGCAGTATGGCTGATTTC[C/T]TGCAAGACCGAAAT
RM20091960079_11GT	GAAAGGAACA[G/T]AACGATTTGACAACGGTTCAAATGTAAATATCACAGATAGAAGAAGCTTAGTTACCAGTATCTTTGTTAA
RM20091960081_57AC	GAAAGTTTGTAACTTTGTAGGGGTCCTCATGTCATGATAGAATAAATGTCTTTATT[A/C]TTTTCAAAAATGGCAAACTCATCA
RM20091960082_74AG	AACTTGCGGAATTGGATTCCACAGAAACAGGATTGTCTGAGGGTAACAATTGGCACAAATGCCATCTCACATG[A/G]TGACTAC
RM20091960083_31AG	GCAGGCGACTGGGAGGGGCTGTCCTCTCTC[A/G]AAGGAGAATAGAGGGGAGGAGAGTCACTTCAATAACATAACCGTAATCAT
RM20091960084_47AC	GCCTCTTCACTGCCTGTCTAAAACAGAACTGAACTGATCTGGAGGG[A/C]TGGTTTTTGAGAGAAGAGCTGTGTGACAGGTGCA
RM20091960085_36CT	CCTAAGACGGAGGGCATCATCTTGATCGGAGAGAT[C/T]GGAGGCAACGCCGAGGAGAACGCTGCCAATTACCTCAAACAGCAC
RM20091960087_46AG	GGCCAAACATACAGGTTGACTGTATAGGAGAGCACTCTGACTCAC[A/G]CACATATCATCAGTTTGATTTTACTGCAGGGCTTC
RM20091960088_59AG	CCAATTTGTTGTCCGCTGCACCTCACCTTCAACACAGAAGAGCCAGATAAAAGCTGTG[A/G]GGTGTCTTGTCAAAGGAAGCCT
RM20091960089_61GT	GAGACAGAGAGCAGCACTGCTTCAGACAACCATAGAGATTATTATTAAAATACAAATATT[G/T]AACCTTTATTTAACTAGATC
RM20091960090_7GT	TATCCT[G/T]ACATGACCGTCCGGCATTACATGCCACCAGCCATACTGCTCGTTCTGTGCATGATTTCCTGCAAGACAGGACTG
RM20091960091_34AG	TTAAGGGGGGGAAGCTCAACTATATTGTGTGTC[A/G]GGGACTACTTTTTTACACCCAGCCACAGCAACGGGATTTGATGTCCT
RM20091960092_10AG	AGATGGGAG[A/G]ATGAGGAGGAAGAAGCAGGAGGAAGACATTATCGTTAGTGCCTGCCTGTATGACCAAGCATGCTATATGCA
RM20091960093_35AG	GAGGGGCAGGGTGGATGTAGCTGTGGCTGTTGGG[A/G]TAGGTACAGGTGTGGGCCTGGCTCTCAGCTCCTGCAGACTGCTACT
RM20091960094_23AG	ATGTAGGGATGGAAGGAGGGAG[A/G]GGGATGGATGAACTGTGAAATATCACCCTGACAGCACTAAGGGTTGTCATCGCATCAA
RM20091960095_41CG	CATCACAGGGTCAGTAAGGGACCTTCCAGAAATTAATACA[C/G]AGACACAGATCAATTCCCCCAGTGACTTTGATACGCAACA
RM20091960096_9GT	GAGATGGT[G/T]AACCCAATGAAGAACAAGAAGTGTAACCACCACTACGACCGGGACGCCATTATGGGGATGATCAAGGCCAGG
RM20091960097_3AG	GA[A/G]TGTGGAGGCATCATGGTTCAGTCCTGCGTCATACGATCTACAAAGAAGAAACCCAACTTCGACATCAACACACTCTTA
RM20091960099_64AG	GACTGAAGGTAATTAAGTGGCAGCAGACTGGGACATGCTGTTGCAGATTTCTCCTATGAAATG[A/G]TAATGGCAGGGTCCTGC
RM20091960100_62AC	ACAGATATGAGCGTCTGGATGGATCAGTCAGGGGGGAAGAGCGTAACCTGGCCATCAAGAA[A/C]TTCAGCAGCAAAGACGTCT
RM20091960101_14AG	AGACAGAGAAGAC[A/G]ATTTGTTGAGGGGCCCTAGGGATTGAGTTTCCTTTGAAAACAGGTAGTACCACAGCGTGCCTGGAGG
RM20091960102_75AT	TAATGCATTATGACGTGGTTATACAGCAATGTCTTATCGTCTCATTGTGACCAAATAAGTCATTTGGAGTGGGT[A/T]GTACAT
RM20091960103_22GT	GTGCAGTAGTCTCTGGTACTC[G/T]GCAGCATGGCGGTTGGCATGGTTCAGCTGGACCTCCATCTCGTTCATGTCTCCCTCCAT
RM20091960105_44AG	AAGGATAGCACATCTCCATTCTCACATCGCCATTCGATGCCCC[A/G]TAAGGTCCCGGGAGTCAGATCTGTTGATTCTAACCAT
RM20091960106_80CT	TATAATTTACTGCTGACCCACTGGCTGATTCTGAACATTCAAATATTCCAAGCCCTGCGAGGCCCCATCTGTGATACTA[C/T]G
RM20091960107_49AG	GAGTTCAATAACTACAGGCAGATAGATGTATGGTGATATGCCGGAGGA[A/G]GCTTTGAATAGGTCTGTGACCTACAGAGTAAT
RM20091960108_26AC	CATCCTGACATGACCCTCCAGCATG[A/C]CAGTTATGGTGCCACTGACAACCATAATTATGCCAATGATAAGGTGTTGTTATGA
RM20091960109_1CT	[C/T]ATTCTAAGCAAGAAAATAGTTATAACATTAAGATCCTATATCTGTAGTAGAGGCACTTGCATTTTAGATTGGAATTACCC
RM20091960110_19AG	ACCTCTCTTACTTTTAGG[A/G]GGTTTTAAATGACCATTTGCCAATTCCCGGGGCTCTTTGATACTTCTGTCTACTCTAGAGAG
RM20091960112_47AC	GACAACACCAAGTCACAACGAAGGATCCGAAAAGGGCTCTTCATGT[A/C]TGTGTATGTTCAGTGCTGTTCAGTGTCTGTGTGT
RM20091960113_51CT	CAGCCGCGCCTCCGCCTCCTCCCCCCGCTTCGCCTGCCCCTCATGAGCAT[C/T]ACGCTCTGACGCCTGGGGAGGCGAGGGAGG
RM20091960116_36AG	ATTTCTTCAGACGGGTAAAGACAACAAAGATATAT[A/G]ATGAACATTTTAATGAAAGATCCTTACAACTATCGGTGTGTAATG
RM20091960117_18AG	TTATCCAGTCAGTTAAT[A/G]AATCAAGAGTTACTGCAGGCTTTATCCAGTCAGTGAATGAATCAAGAGTTACTGCAGGCTTTA
RM20091960118_48AG	GTTTCTAACTTAACCAACTCATCATTGTCAAACATTGCAAGAAAACA[A/G]CGCTGTTGAATGCAGGAACCAAGGTTAGCATAC
RM20091960120_69AC	ATTAAACGTGCAAGTCAGAACACTGTTTAAATGTCATCTGGTGTTACACTTTCAGCGTTATCAAAGTC[A/C]GGAGGCTGTGCT
RM20091960121_10AT	GCAGTGCAC[A/T]GCAGGCTGCCAGCCCAGCACTCATACAGCTAAGTGGCATTTATGCAGTTCCTGGAAGGACAGCATTTTATT
RM20091960122_16AC	GCCACCATTGGGAGG[A/C]ATGAGGAGCTACTGCTGGACCTTTTGGAAGGATTCCCTGACGGAACGCTATTATGGAGCAAATCA
RM20091960123_34AC	TCATAAGACTCGTAGACACAACAAAGTGTGTAG[A/C]TACAAACACACACTTGAGTGTTAACTGTATTGATCCATACAAACACA
RM20091960126_17AG	GAGGGAGAGGCATGGC[A/G]AGCCATACATACCAATGACATTGATCCCCGCGGCTGGGAAAGCTGCTGAGCCGGTCCTATTGTA
RM20091960127_34CT	CTATTTCCTACAGTTTTTACACTACATACACAA[C/T]TCATACATCAAACTCCTGCAGAGCTAGATGCTGATGTGACATGCTGT
RM20091960128_75AC	AGATTTACAGACCTAACCCATTTCTGAACGCAGAGCCCCATATCAGGCATCAATCTTCCAGAGCACTGGAACAA[A/C]CAAGTT
RM20091960129_51CT	CTCATCCAGGTCAAAGGGCTCAGCCGTGTCCTTCTGTGGTAACATTGCAG[C/T]CAACCGGGTCAGAGGCAAGGCTCTCAAATA
RM20091960131_32CT	ACCATGACCAATTGAATTAATGTCAATTATG[C/T]CTTTCAAAGTCAAATATTTTAAATCACATTTGAGCCCTGGGTTTTCACA
RM20091960132_5CT	CATC[C/T]TGACATGACCTTTCAGCATGACAATGCCTCCAGCCATACTGCTCGATCTGTACGTGATTTCCTGCAAGACAGGAAT
RM20091960133_45AG	CATCCTGACATGACTCTCCAGCATGACAATGCCACCAGCCATAC[A/G]GCTCATTCTGTGGTTTATTTCAATCCCATTGAGCAT
RM20091960134_69CG	TCTGTTCACAATAACCAGTCTGTCTCCAGCAGAATTCTGTCCACAATAACCAGTCTGTCTCCAGCAGG[C/G]TTCTGTTCACAA
RM20091960135_44CG	TTAGCTTCTGTCCTGAAGCAGTTTAGTTCACTAACTGACCTGT[C/G]ACTCACAGACTGGGGTTAGGCCTGTATTAATAAAGCA
RM20091960136_56AG	TGTTGGGTCATTGTCCTGTTGAAAAACAAATGATAGTCCCCCACTAAAACAGGAG[A/G]AGGGATGGCCGCTTTGTTGTTGTTA
RM20091960137_71CG	CAGGCATTTGATAAATGAACCCGGTTGCAGCCAGGGAAACCACAAGGCCTCCCTGAAAAACCACACAAGA[C/G]ACGTAGATAT
RM20091960138_55AT	TCCACACGCTTTTGTTCATGTGTACCTTCATCCACCTCTTGGGGCTGGATGTAA[A/T]ACCAAATATATATTACCAGAAAATAT
RM20091960139_7AG	TCCAGT[A/G]ATAATGTGCTGCACCGGGGCTTTCAGAGAGATGCGTCCGTGGTCATGCGTGTGTTTTGGGAAGGGGACCCACTT
RM20091960140_25CT	CCTGGCTGCTATCATGATCATTAT[C/T]GTGTGGTTGCATGCAGTGCCGTTAAGGAAAAAAATCGCATGAATTCCACATGGGAT
RM20091960141_37AG	ACCCTGTTTACAGACACTCAGGACATGTCCAGCTCC[A/G]CCCATATCCTCCATCCGTCTCTATCTCAGCTTTAGAACGCACAT
RM20091960142_37CT	CTTTGTTTCATGTGGTTGAGTGGGGGGAAACAGCTG[C/T]GGGCAAGGTTCTGACACATTGGTGTGACTTGGTGGTGGTAAGGA
RM20091960143_50AT	ACGAGGACTGCCCTGTGAGCGCAGAAGCGCTGACCGTCAATCTGGATTG[A/T]GACATCCGTCAGGATATTTCTACTGCGGAGG
RM20091960144_8AG	GCTCTAC[A/G]TCCTGGTTGAAATTGGGGTGTCGTACCACGGGCCGGGACATCCTGGAGGCGCGGGCTCACAAACACACATGCA
RM20091960145_61GT	ACCCTTCCACTCCATCCTCAGATGAGCTGAGACAAGTGTCAGAGCAGGAAATGTCAGAGC[G/T]CTGCCACAGACCCTCAGTGC
RM20091960146_17CT	CAATTTCCTGTCACAA[C/T]CCCCCAGGGCTCCATGGTTACTGTCCTGTCACAACCCCCCAGGGCTCCATGGTTACTGTCCTGT
RM20091960147_22AG	CTACACAAAATGCAGAAATAA[A/G]ATATAAAAATGTCTTACCTTTGACGAGCTTCTTTTGTTGACACTCCAATATGTCCCATA
RM20091960148_16AG	GGTCACCACATGAGG[A/G]AGGATGTCTCCCTGTAACGCACAGCTTTGAGATTGTCTGCAATGGCAACAAGCTCAGTCCAATTA
RM20091960149_32AC	CGTCCTGACATGATCCTCAGCATGACAATGC[A/C]ACTAGCCATACTGCTTGTTCTGTGTGTGATTTCCTGCAAGACAGGAATG
RM20091960150_68AC	GCCCTATGAAGAGATCAACTAAGGAGCAGGGCTGCCCTCTTCTGGCCAATGAACAACTGCATAAATT[A/C]TGTCATTTGCCTA
RM20091960151_9CT	GCAGTCAC[C/T]GTGCACAGTGTGGACACAGAGTGCTGATCCTCTGTACCCGATCCCTACACAGGCCTCAGCTCTCCTCCAACC
RM20091960152_18AG	TGATGTTTGGATGTACC[A/G]ATCCTGTGCAGGTGTTGTTACACGTAGTCTGCCACGCGAGGACGATCAGCTGTCCGTCCTGTC
RM20091960153_73AG	AGAGCAGCTAAAATCCTCTAATTCCAAAATAAAAACAGTTTGGGACTGAGGCAAATCCCTACCCACGTTTTT[A/G]CAAATGTG
RM20091960154_50AC	CATCCTGACATGACCATGCAAAGAGCCCGGATCTCAGTCCCATTGAGCA[A/C]GTCTGGGACCTGTTGGATCGGTGGGTGAGGG
RM20091960156_5AG	AGAG[A/G]GCTACTGGGGTTCTGTGATGCTGCACCAATGTCTGTTTAAATCCAGAGCAGTGATGCAGTCCACCAGTAGTCCTGT
RM20091960158_26AG	GTTTGTTTGTTGTGATGCAGGTCTG[A/G]TGAATTAGGCAGGTCTGGTGAATTAGGCAGGTCTGGTGAATTAGGCAGGTCTGGT
RM20091960159_2CT	A[C/T]GGAGTACTACTGCTGCTGGAGGGCTGCTGGACCTGCAGCCTCAGAGCCGGGGAAGAAGCCCGTCGGTTAGCCAGGGGCA
RM20091960160_60CT	TGTCTGGAGCCTGGACGCACGGCCAAGGTAAGACTGCCAAGCTCTTGCTTCTAGATTTT[C/T]TTATAATTCAGTACTTTACTG
RM20091960161_46CG	AGGCAGTATCCCCGGTGATGCGTTGGACATACCCAGCGGCGACCA[C/G]TCATTTAGATTTTTTGGGGCTTGCCTGTTTTAAAT
RM20091960162_81CT	TTTTGGGGTGTGGTGTGAAAAAGGCAGATCATCTCTTTATTACGGACAGACCTCTTCCCATTTTTTTACAACCATTGAAT[C/T]
RM20091960163_68AC	CACACCCAGCAGGAGTTCCCCTTATCTGCATTGAGGCTCTTATAAATGGGATTAAGGTAGTGGTATG[A/C]AACATATATGCTC
RM20091960164_11AG	CAGACAGCCA[A/G]GGAAGACCAGTCTACGGAGCTCAGGTGAATCTTGCAGTATGTTAGCAATATCATGGAATGAATCAAAGAT
RM20091960165_30CT	TTAACCAGATAGATATTGTTCTTGATAGG[C/T]AGTGTTTAGACAGACACCCAATTCAGATTTTTTTATTTTAAGAATCACATC
RM20091960167_33GT	ACTGATGGACACCTCACATCTCTCACTAATAC[G/T]ACTACTTACACAAAGGTTACATCCCAAGTGGCAGGCTATTCCCTACAT
RM20091960168_37CT	CAGCATGCGGGAGAAGGGACAGCTGGCGTCCTCACA[C/T]GTCTGGACTGTCACAACCAAACAATGAGGAGGTAAGCCATAGAA
RM20091960169_78AG	CCCGGACATTTCTGGGGGGAATGGCCCAAGCCCTCACCCTCTGATCCAACAGCTCTCAGATGTGCTCAATGGGATTG[A/G]GAT
RM20091960170_66CT	CATCCTGACATGACCCTCCATCATGACAATGCCACCAACCATACTGCTTGCTCTGTGCGTGAATT[C/T]CTGCAAGACAGGCAT
RM20091960171_71AG	TCCTGCAAGAATTGTCATGTTTGTGCAGGATTTTCAACATTTCTGCAGGACAAGTCATTCATGCAATGGC[A/G]TTGTAGTAAC
RM20091960173_37AC	AAGGAAAACGGAGGTACATCATTTTGATGCAGGCAG[A/C]CATTTTTATACTGTATGAAATCCTATTGGAGCAGACCTGGGTTC
RM20091960174_49AG	CACGTTGTCTAAAAATTCCATTCCACTTCATCTGCTTTCCCAACATAT[A/G]CTTTCCCAACAACTACCGACAATAATTGCCCT
RM20091960175_61CT	CTTTTCAGCATCAAAAGCCTGTAATACACTGCAGGTCCAATAGGTTCCCCACTGTGCAAA[C/T]ATGTCTACAATATATATATA
RM20091960176_54CT	AGCTGGAACCAGGTGAGGCCTCCCTCTAGTTATGACTTCTGTGGAGAAGAGGA[C/T]GAGAACATCAGAGGCTCAGAGCTTTTC
RM20091960178_39AC	TGGTGAAAACAGTCTCAGGTGGGCAGTGGAAGTTCCAT[A/C]TGGCTGATCAAATGACATCAAATGACAAGATTTGGTCATTAA
RM20091960179_60CT	AGGAGGGAAGCAGGAGAGAAGAGGGGTTAGGACTGGAGAGGACACCTGGAGAGAGAGGA[C/T]ACCTGGAGAGGACATCCTGGA
RM20091960180_33CT	TGTCACAACCTATAATGGCAATGTCACAAGGT[C/T]CCCCTCATGGGACTCTGATCATTAATGGCTTATCACTATGCATTTTGC
RM20091960181_81AG	CCATGATTCCTTGAATATTGCTCCGGAGGAGGTAAGTGGGTGTTCTCGGGGAGCCGGAATAGGCTTTACAAACTCACCAC[A/G]
RM20091960182_7AC	AAAGCG[A/C]TCAATTTCAGAGAAAATTACTTACATAATTACATACGAGGGTGCCCTGCGTGAGAGAGTGCATAATGTATGGCT
RM20091960183_42AT	CACTGAGCAGTGACCCAAAACAAGCCTTTTCATTACTAACC[A/T]CCTTTTCACAAGAAGCAAAGCAATGGAGACAAGACTCTT
RM20091960184_77AC	TGAAATGTGCTATCCCCTTTGTTTTTCTGCTGGTGCTATCATCAGATAATAGCTTCTTCTGCTTTTGCCGAAAAGT[A/C]TTTT
RM20091960185_24GT	GAGAAATATGTATGTCAAAAAAT[G/T]GTGAAATTGAATGGTCTTCTTGACGAAGGAATGAGCCACCCTGCATGGCCGCCAATG
RM20091960186_48AG	CCTGGTGTGTGGCTAGAAAGAACATTCACCATCAGGCTTCATGGCAG[A/G]ATAATGAGCCAGTCAGTAATAACAGTCAAGGAA
RM20091960187_70AC	ATTTGTAATAATTAACCTTAGGGACTGTGAACATCCTCCTGAACCCAGAGAGGTACCCTCAGCATCACA[A/C]GAGAGGGTCAC
RM20091960188_59CT	GTCATCCACCATCTCCTCCACGGCACTCAGTCCCAGGCTGGCCGGCAGCTCCTCCTCA[C/T]CCCCCAGCAGCACGGTGAAGAT
RM20091960189_49CG	AGCTAGCTAATGTATCAATATGTGAAGTGTGATAGAGATTTATTGTAT[C/G]TGGCGTGCTTGTTGACTGGTGAACGTGACAAG
RM20091960190_46AG	CTTGTGTGGTGGGGTTGTCATGGTTTCTCAGTACCTAGTCACTCC[A/G]TAGTTTATCTCAGCAGGACACTTAAATTGGTCAAT
RM20091960192_33AT	GGGTACCATATGAGGGAGGAGGATGTCTTCCC[A/T]GTAACACACAGCGTTGAGATTGCCTGCATGACAACAAGCTCAGTCCGA
RM20091960193_43AG	GTCCTTGAACAGCACCAGGCCGTGTCCGGACATGACAGTCAC[A/G]CACACGACCAGACAAAGCACCCAGGCGTAGCGCGCGCT
RM20091960194_32CT	GAAGCTGCCTTGCAGGCTCAACCTCTCCCAA[C/T]TGGTAGGTGTTTGTTTGAGTGGGCTCATTCACATTCATTTGGACATTTT
RM20091960195_41AC	TTGAGTAAAGTGGGGGATACTCTAGTAATGATTATCTTTT[A/C]TTTTAATTTAAATAAGAAGTCCCATTCAGAGTACCTCTTT
RM20091960196_52CT	TGAAATATGATACCCTATTTGTTTACTGTTGTGCTATCATCAGATATTAGC[C/T]TCTTATGCTTTCACAGAAAAGTATTTTTA
RM20091960199_5AG	TTAT[A/G]CTTTATTACTTGCTATAAGCATGTATGAGTTTTTATTTTGCGATGTCTCGACAAACATAAAATAACATCTTATTCC
RM20091960200_25AG	GATCTTGCTGTTCTGGTCGTTGTC[A/G]GTCTCGTGGGGGTCGGTGGGAAGAGAGTCATAGGTACGGCGGTACAACGACCGGGT
RM20091960202_4GT	CTG[G/T]GACTCTTCTGTGGCGGACTGGACAAACTCTGCACTGCACAGGTTGATGGACAGCACTGTGGCCTTACGCTTGTCAAC
RM20091960203_42AT	CGTCGGCCTGTCTATTAACTGGTCTGGTGTTAACCCAGGAT[A/T]ACAGACAAAGTCAGACCAGTTAAATGGTCTGTCTGAACA
RM20091960204_70CT	TGATCTAGTTCATGGTTTTATCCAGGGACAACCCAAGGACATTTTAAGGACTTTCTCAGAACATTGTGT[C/T]ATGGTGCCCTG
RM20091960205_55CT	TACCTCTGCCATCCTAACCTCTGCCATATCCTGGGGCTTGGGGGCAGACACACA[C/T]ACAGACAAGGGCACAGACACACACTC
RM20091960206_63AG	GTTCTCATAGAGTGATTTTAATAAAGAATGTGCTGTCCTTCCAGTGTGCAGCTCAGGATGTC[A/G]GTAGAGAGTGGGCAGCTC
RM20091960208_20AC	TGATGATATCTTATGATCA[A/C]GGTTCATCTCTGATTCTGACCGCTGTTTCTGGCTGCCATCCTTTTGTACCTCTCCATGCAC
RM20091960209_54AC	GTTAGCCGGGTAAGTTTAGATGTGACTTTGCATATGCGATTGATAAAAGGTTC[A/C]ATTTTTTCTCTTGATAATTGTGAATCA
RM20091960210_58CT	TGAGGTAAACTCCAGATAAACTCCTGTTAATGAGTCCTAAGAGACCCTCTCTGTGGG[C/T]GTCAGGGCTCAGAGCGTACCTGA
RM20091960211_81AT	GATGTCACTGGCAAGCTGTGCCGACTTAAGACACTATGCATGGGAGAACGGGAGGAGGCCCAAGCTACTAACCTCAGATT[A/T]
RM20091960212_1AC	[A/C]TAATTTTGTTTTATCTTGATTATTGTCCAGCTATGTGGTCAAGTGCTGTTAAAAACAACCTAGTTAAGCCCAAAACAGAG
RM20091960213_28AG	TAGAGCATGTTAGACATGAAGTTGACG[A/G]GGTTGACGCTACGAGACTTATCCATGATCCAATCTTGTAGCGAAGCGATTCAA
RM20091960214_75GT	AGTAGGAGGCAGGCATTGATGGGAATTGTAGTGGTTTGAAACACTACAGATAATTGTCTATGTAGAACATATTA[G/T]GAAGAA
RM20091960216_2CT	G[C/T]GGGAATATTCACCAAACCGGCCTCTATGAAATTGTTCTGCTAATTCCTTTAGCAATTGAATAACTCTGATAATCTACTC
RM20091960219_63GT	AAGACGCTGGGTGTGGAGGCTTCTGCTCCAGCTCCTGATTCAGCTAATCAAGGTCTCGATGA[G/T]AAGCTGATTAGTAGACTC
RM20091960220_27AC	GGGTACCACATGGGGGAGGAGGATGT[A/C]TTCCCTGTAATGCACAGCATTGAGATTGCCTGCAATGACAGCATCCGATGATGC
RM20091960221_41AC	ACACACATTGTCATGATGAAACTGTGTTAAATTATATCCA[A/C]TGTTATGGAAGCTAGTCGGACAGAAAACGGTATATTGTCA
RM20091960222_5AT	TGAA[A/T]TATGTTGCCCTCTTTGTTTACTATTGTGCTATCATCAGATAATAGCTTCTTATGCTTTCGCCAAAAATATTTTTTA
RM20091960224_79AG	GGGGGTCAGCGACTCGGTGCTCTCAGGACTCATCTGGGAGGTGGGGGTGTGGAACACGGTGCTCTGGGGGGTGGGGGA[A/G]AC
RM20091960225_52CT	GAAGTAACAGGCCAGATAACTCAGTCCTCCTGTCAGTCAAGGTTGCAGGAT[C/T]CCTGTCTGGTGTGCGTTTGTCCAATGACA
RM20091960226_52GT	GCTGAAGGTACTGCTGTGTAGCCCCCTACGCTATCTATGGATGGTCCTCAT[G/T]GCCCTCACTGTGCTCTGTGTGGCCATCCA
RM20091960227_68CT	GGGTACCACACGAGGGAGGAGGATGTCTTCCCTGTAACGCATAGTTGTTGTTGCCATCCTGTACCTG[C/T]CCCGCAGGTGTGA
RM20091960228_71CT	TTACCTTACCCTCCTCCTCCTACTGGCACTTCACACCTCTCACCACTAGAGGCATCAAACACTCCATGTT[C/T]TGTATGTTGC
RM20091960229_81AG	CAGCCCTCCGAGGCCTCGGCTCAGCCTGAACCCCCCAAGGCTGCCCAGACCCCCGCCTCCAAGAAGAAGTCCACCAAGAA[A/G]
RM20091960231_42CT	GTGATGGTGGGTATGGGTCAGAAGGACTCCTATGTAGGAGA[C/T]GAGGCCCAGAGCAAGAGAGGTATCCTGACCCTCAAGTAC
RM20091960232_46AT	TGTAGCTTTAATTGAGTATCTTACATGTGTGATTTAATAAAAGTT[A/T]GATTTTATATCATTTTTTTGAATTTGCCGCGCTGC
RM20091960233_49GT	CTTAGCCGTCTTATCTAACCTATCCTACTGAGGGCTGTCTAATACTCT[G/T]AACATAATAAAATGCCCTAACAGCTAGCCAGA
RM20091960234_65CG	ACAGGCCTACCACAAGGATTCGCTAGAGCGTAATGAGCCAAGTAAAGCTCCCCAACCAAACCTT[C/G]CTCTTACCCGGACAAC
RM20091960235_80CT	AATAACATTGTTATCTGGAAACAGCTGCTGCTCCCAGAGACCAGGGGCCCCCGGGGGCACGCACCAGGCAAGGGCCCCA[C/T]A
RM20091960236_7AC	CCCAGC[A/C]CAGCCAAGGAAAGCCCCACTAGTCAAACCCTCCCCTACCCCAGATGGGCTGGATCGAACTCCAGGCTGTAGTGG
RM20091960238_3CG	TG[C/G]CTGTAAAGCTATCATCTGGTTCTGATGTCTCTTTGGGAAGTCTTGGCCAGTGGTAATAAACAAGATATCTGAGCAGCG
RM20091960239_39AG	ATTGAGAAGTTCCTGGAGACGGCCAAGGAGAACCAACT[A/G]AGTGACCTCAAGAACATCCACAACCAGTATGAGCTAGTCCTC
RM20091960240_9AG	AGACCTGC[A/G]TGCGTCAGACCCCAACTAATCAGACCCCATCCCGGAATCACCCGAACCACGGAGTCCCTAACAGCCGACGTC
RM20091960241_11CT	CCCGCGGACC[C/T]GGAGGAGACGACGGCCCCAAAGGCAACCCTGTGAGTCACGTCACATATAACCAAACTTTATTCATTCCAC
RM20091960242_68AG	ATGACCACAAACAGGAGGTGAGGATTATTTCAGTTTAAAGTATTGTATAATGAATCGTACATAGGTT[A/G]CTTTTGTTAGGAA
RM20091960244_56CG	TACTATAACTCCCCAGTTATTGTAAAGGTATAATCCTCAGAGTGGAGACAATTTG[C/G]TTATTGTCTTAAAAGGAATTGGAGG
RM20091960245_45CT	TAACAGGGCCAAATCCATCAATAATCACTCATATCTAAAGTATT[C/T]ATGAGATCAATAAACAGTGTATTAAATGTCCTCTTC
RM20091960246_6AG	CCTAA[A/G]TTGCCTTTACCACAGACCTAAAAAATGAAGAAGATGAGAAAGGTAGACAGCTGTGCTTTTGGTACTGATCTTCTG
RM20091960247_12AG	CCCAGGCTACC[A/G]GCTACACCCCGCCAAGGTGCTCTCCTTCTAGTGGTCAGTGTACCAAACGTCCCAGAGCGCTCCTTCTCC
RM20091960248_13CT	AACAGGTAAATA[C/T]CTTCAATCAGACTTTCATTATTAGAAATTGTTCTTAAACAACATATATCTCTGGCTGCAGTGGCCATA
RM20091960249_75AG	CAGATAACCAAATAAAGATTCATTAAGGAGAAGGCCCTGCACTTAGCTTCTTTTTGTCACTCAACAAAGACATC[A/G]ATTGCC
RM20091960250_57CT	AGGGTTTGGTAGCAGCTAGTCAGGGATGGGGTGTGGCCTAGACACACTGTAAGATT[C/T]ACTGTAATCAAAGGCATTCACAGA
RM20091960251_40CG	GGTGGGGGGAGGAGTTACACCTGGTGAGTGACATTCACT[C/G]ACTGACGTGGTTGACATTGCATATACAGCACATGAAGGAGC
RM20091960252_74AT	AGATGTGTCCGGGGCTGTGATCAGAGTGCTCCTTGTGACTGTGTGTGTGGAGGAGAGTTGTTGGAAACCCCCC[A/T]CTTACGT
RM20091960253_3AG	GT[A/G]AAGGTCTTTGTTTGTCAGACAAATGAGTACTTGAGGTCACCGAGAAAGTCTGGACATGGCCTGCGCTCCCTTATGTAA
RM20091960254_46GT	GCTCCACTTAGTCTCCAGCATCTTGTTCTGCTGTTCCAGGAAGCG[G/T]ACCTGTGTGTAGAGAGAGAAATATAATAGTTACAA
RM20091960255_15CT	TCCTCCTCGTTTCA[C/T]TGGAACGGCAGTGTCTTAGCATCTTTAACGACTATGAATGTTACAGAATAAACTAAAACAGCAGGG
RM20091960256_45GT	GAACCTGTTCCCCGATGTGTCCAGGTCCTCTTTGTATCGCCCCT[G/T]GGTTTTCTCGTACTCCTTAATGAGGAACTCCACTGG
RM20091960257_57AC	CCGTCTTTAATGGACTATGGAGCGTTGTGTTTTCTGCTGTAGCAACAAATCTTTCA[A/C]CCCAACATCCAATCTCCAACATAG
RM20091960258_15AC	ATGTCTCTCCATAA[A/C]ATAACAGTCTATGACATTTGTTGTAGCTTTCATTGCTATCATAACAGCCAGACACTTATTGTAGAT
RM20091960259_64CT	TGTAACAGAGTTTGTAAAAACTAGGCAATGTTTCAACTCTTCGCACTTTCAGAGTACTGAGAG[C/T]TTTGAAAACTATTTCAG
RM20091960260_28AC	CCACAGCCGAGACTCTACCTGTGTGGC[A/C]CACTGCAACTTCTACACAGGGTCAGTGGGAGTGTGTGTGTTACTTGTGTGTGA
RM20091960261_56AT	TTTGTGCCTCTGTGAAGGAATTGTGCAGGACTAATGTTGATAACTGTCAGAAGTT[A/T]TGCCTACTCCTCTGTAGGACTCCTG
RM20091960262_81CT	TACCCTCTGTGGTTGTGTCCGTTCGTGCTCCCCCTGGCCCGGGGGATGGTTCATCCTAAAGGTGAGGAGGCAGAGCTGTA[C/T]
RM20091960263_72AG	ATTGGGGGAAGTGAACCCACACTAGATAAGTGAACATTATCCCTGTGTGTTGATTGAAGATACTCTTCATT[A/G]GAAAATCAG
RM20091960265_9CG	AGTGAGCA[C/G]CTCCAGTCAACAGATTAGTCTTTCCCAGGCTTTGCGTTCAGGCAGATTGTTGTGATGGTTTTATACTGACCC
RM20091960266_58AC	ACTACTGCCCTAGAGGCACCATCGATCCTCAACCTTGCCCCATTGGCACGTTCAGCA[A/C]CCTGACCAAACTAGTCTCCCAGG
RM20091960267_37AC	TTTGTTAACAAGGACATTGATATTTAATGCACTCCC[A/C]AACATTAAATCTATTGTCACACGCCCCTCCTGTTGTACTGTAAA
RM20091960268_46AG	GCGCTGGTGGATCTTCCGGCCAAGATGCCAATGGCACGGGCTCGG[A/G]GATCCTGCTTCTTCTTGTTAGGCACCTGCCCTTCT
RM20091960271_65CT	TGAAATGTTCTCTCTTTTGTTTACTATGGTGCTATGCTCAGATAATAGCATCGTTTGCTTTTGC[C/T]GAAAATCTGACATTTT
RM20091960272_31GT	GTTTTTCTGAGCTTTCTCCAGTGTAAAGCA[G/T]TTATACTCTCCACGAGGTAGAGAAATAGCAGTTTCATCACTTTGTGGTCC
RM20091960274_1AC	[A/C]CTGGCCTGCCACAAGGAGTCTCGAGAGTGCGGCTGGCCAAACTCTTGCCTAACCCGGAACAATTGTGCGCTGCCTCATGG
RM20091960275_63GT	TTGCCCCAGGCTTCTCACCTAGCTGCCCTGCTCTACCCACAGCGCCCCCGATGGCTGGAGGG[G/T]ATACTGCTGGTGGGGGCA
RM20091960276_32AT	ACTAGCTCTCCAGGAAGAAAGTGTACTCCCT[A/T]GCTAAATAATGTTGAATTGATCAAGACCGGAATCGCCCGTCCTTCACAG
RM20091960277_79GT	CATCCGTCCTGACGGACATTTGCTGTTTGTTGCCTGAGGGATTATCTATCTATCCCTCTGTCTGCTGGATGAAACAAA[G/T]GA
RM20091960278_38AC	AAGAAGGGGAAACTCTTGCCCTCTGGCCCGAAGTTAA[A/C]CTCTTTCAAAGCTGTCACTATACGGAGCAGAACCCTTACTACT
RM20091960279_71AG	GAGTCACAGGACCCAACTCAATCAAACCTGCATTCCAGTATTTACACACCGAGCTCTTTTTCACATTGTC[A/G]AAAAACAGTT
RM20091960280_76AG	TAGAGAGAGAGTAGGCTGGCCCACGAAGTTGTCAAACTGGTTTAGTTTGAGTGAGTCCCTAAATGCCAGAGACTT[A/G]TTAAA
RM20091960281_28AT	AAGGGGTGAGGAGAGAGTATACTCCGA[A/T]AACAACTTTTGTATTGTGGTTAGAGTCAAATTCTACCTCTCTCCCGCTCGTGA
RM20091960282_58AG	TGTTGGCTTGGTCACATGGTCCTTCATCGCCTGGGAAATGCCTGGAGAAAGAAAAGT[A/G]GGAGGCCTTGGTTAGAGAGATGG
RM20091960283_24AG	CCGCTAGGGCCCCCCAGGTAGGA[A/G]GGGTGTCTGGTGACAGAGGGAAATACGGATGATAAATGTTATTACTGTATGTGGTCG
RM20091960284_55CT	GACCTCAGCTTTAAGGGTGCATGACAGGTGTTCCGCTCACAAGGCATGGAAGGA[C/T]CTGAGAAATGAGTTGCTAATGGACAT
RM20091960285_73GT	AGCAGCCCGGCCGAGGGCGGCAACAGCAAGGAGTCTGAGATCAAGAAGGAGCCTCCTGCTAGCCCTGCCACC[G/T]CCAACCCC
RM20091960286_75CT	GAGCAGATGTACCGCAGGTGAGTTGGCCGTTTCAGTTTCTCACAAAATGGATGATAAAGTTTCTATTTTCTATT[C/T]GATTAT
RM20091960287_29AC	AGTTTGGCTTTAATGGAATTAAAATGTC[A/C]ATTTCCAGGCCAGAGATCATTGCTGTAACTCGCCACCACAGACTGAGCACCT
RM20091960288_81AC	GGTAGAGAGGGATGGTGGAGGAGAAGAGATGGTGGGAATAAGGACGTCTGGCAATTGTACTGCTGAGAAATGACAGTAAA[A/C]
RM20091960289_38AC	AGATATACCCAATTCCCAGCTTCAAGATGTACTCATT[A/C]CCAACAGCTTACAACACACAGCCCATGCCTCCTATACACTAAA
RM20091960290_53GT	TTTGTTACAAACCTACTCTACCAAACCTGATTCTACTAATCAGTTTCTCCTC[G/T]GGACCTGAATTAGTCGAATCAGGTGTGT
RM20091960291_16CT	GCCGCTGGGGTCGTT[C/T]TCTTTGATCACCTCCAGACAGTACTCCATCATGCCTGTAGTCTGACGTAGCTTCATAGTGCAGTG
RM20091960292_29AG	CGACACAAAACGACACAAACGACACAAA[A/G]CGCAGAAATAAAAATATAATTCATGCCTTATCTTTGACAAGCTTCTTTTGTT
RM20091960293_30AC	CTGTGCCTCCTTTTTCTCCCAGCACCATC[A/C]TTCCCATCACAGTTTCTGAGACAAGGGCACTCGTCATCTCCTTCTGTTTGT
RM20091960294_25CT	GAAACCTGGGGGTCGTTTTGGAAA[C/T]GGTATCGGCCTGCACATTCAGCTGAATGAGGCCCTTTGTGCCAGCTCTCCAGACCT
RM20091960295_21GT	CCTATTACTTCAGTTGATTG[G/T]CAGTTTCAGTATTTGGTCTCAAGAGGTGTGTAAAATTGCAATTATACTTCAGAATGATCA
RM20091960296_53GT	AATGGGGTCACACTAACCCTGGGTCTATCAGAGTCATCATAATAATGTTTGC[G/T]TTTCCATTTTAGTCATTTAGCAGTGCTC
RM20091960297_69GT	GTTGAAATAGAAGTGGGAGTCTCCCGGGATGGAGCAGTTGAGACGGGTCTTCAGGAAGGAAGTCCACT[G/T]TTTCTCCAGAAC
RM20091960298_23AG	CAACACAAAACGCAGAAATAAA[A/G]ATATAAAGCATGCCTTACCTTTGACGAGCTCCATTTGTTGGCACTCCAATCTGTCCCA
RM20091960299_39CT	GGGCTGACTGAGGACTTGTGAAGAGCAGAATTAACAAC[C/T]TTTGCACCAAGACAGTTCTTTGTGAGAAGGCGTTAACCCATG
RM20091960300_26AC	CCTGTGGATTTCTGAACAAAACATG[A/C]CAAACAAATGGAGGTTTTTGAATATAAAAATAATCTTTATCGAGCAAAAGGAACA
RM20091960301_53CG	ACACAGGGCACAATGGAAACTCGGTGAGATGAACGAGGTAGACCACTTAAAA[C/G]TCCTTGGTTCAACTGAAAGTAGCTTTTC
RM20091960302_54CT	CGCTGAACTAATGACCCTCGCTGAGAAACGTGAAAGCGATGAAAACAAGTGAA[C/T]AAGTCGTCATTCTTCCAGAATGAGAAA
RM20091960303_46GT	CTTCCTACCAGTCACCCAGCATCAGTCCTCTCAGAGCCGTGTCAT[G/T]AGATATCAAAACAAGGATGGCTCAGCTCTTTGTGT
RM20091960304_29CG	CTGTACAGACAGCCCAGAGAGGTTGAGT[C/G]CTGGGACTCGTTCACTCAGTGTGCTTTCTCTGTCAATCACCTTCTGCTCCTT
RM20091960305_22AT	CAGTCTTTCAGGTGACACAGA[A/T]CCCTCCGTCCAGCCCTTATGCCTTTATGGACAACTATTTGACCATAGGGTTTGAACTGT
RM20091960306_50AG	AGGTACAGGATGGCAACAACAACCAGGAACACACAATCCCTCCATCAGT[A/G]CTCAGACTGTCCGCAATAGGCTGAGAGAGGC
RM20091960308_57CT	TACAGAGTCATCTACTGGGCCAACCTGCCAGACGGAGGTAGGGGCTTGTTAACACG[C/T]GCTCAGAATACTTAGCGGACCACT
RM20091960309_81AG	TGAATTGAAATTGAGTCATTGTTATGCATTTTGAATGGAAAATAAGAAACTCACCGCAAGCCGCAAATGAAGGACTTGGG[A/G]
RM20091960310_36CG	AGGAGACCTGGGTTCAAGACCCACAAAGGGTGGTG[C/G]AATGTAACTGTTGGCTACAAAACATTTAAAAACCGAAGATAGTAA
RM20091960311_49AG	GGAGCAGACGGAGACAGTGGTCCTTGGCTTCAGGAGAAGAAAATGGAG[A/G]TGCATTAGACACACACTCATAAAAGAGGCATT
RM20091960314_81GT	GGTGCGGTGCCGGAGATCCCTCCGCCCCCTCTGGACATCGAGGGGTCCCCGGCGTACACGGTATGTTCCGTTCTGGACTC[G/T]
RM20091960315_17CG	TCTGTGGAGCTGCTGT[C/G]ACCTGCTGACTGCTGTCATCTGACTGACTGCTGCTTCTGGAGAGCCCTGTCACTCCAGGTGTCT
RM20091960317_17CT	TGAAATGTTTTGTTTG[C/T]TTATGGAGGTGCGATCCTCAGATAATAGCATTGTTTGCTTTCGCCGAAAAGCCTTTTTGAAATC
RM20091960318_54CT	GCCAATCACCTCCAGGGAATGGGTGATCTGGTCAATGAACAAGCCACAGCCAG[C/T]CTGACTTGACAGTCTCTGGGATAATAT
RM20091960319_66AC	TTCGATGTGAGCCGCATCTGACAGGCCGCAAGCGTCTGTGCAGGCAAAAGAGAAACACAAAAGAA[A/C]CCTGGTTATCGTTCA
RM20091960320_16GT	CGAGAAAGAGCGAGA[G/T]AATCTAGAGCCTACATGGGGAGAAGGGGGCGGGAGAGGGGTAGTAGGAAAGATGGGAGAGCGAGG
RM20091960321_17CT	ACTCTTAAAATATTAT[C/T]GTGCAGTTGCATACATGGATTTATCGGGCTTCACTAAGGGGCTGTAAAATTAAAGTTGTAACAA
RM20091960323_4CT	CAC[C/T]AAGCTCTGCTCCTCTACAGCGCTCCACTACGCATCCTAATGTTAATCCCAAACTCTAACATTTACCCCAAACATGCA
RM20091960326_72GT	CTGCTGCTGAATATTCATGAACTGTGTGTCACAGGATGTGCCCCAAAATGTCACCCTATTGCATTTCTAGT[G/T]CACTACTTT
RM20091960327_36CT	GAAGATGTTGAGTGGGGAGGTTCTGAGGGGAGCGC[C/T]ACCCCCATTAAGTCCAGGGGCCCGGTGAGCTGGGTCCGGCCTGGC
RM20091960329_57AT	GAACATGGTGGGATTGTAGACACCTAAATTGATAGTGCAGTTTGTTTAGCCAATTT[A/T]ACAGCTAACTAGCTACTTCACATG
RM20091960330_59AT	TTACTCAGGCTTACTGTCTTCTGACAAATTACTGTACAGCTGTTAAAAAATAATTACC[A/T]AAATACTACCTAGAAATACTGT
RM20091960331_1AG	[A/G]TATATCAACCCCTTCGTGACCTTCCTGGACCAGAGGAGATGGAAGTGTAACCTGTGCTACCGGGTCAACGACGGTAAGGA
RM20091960332_44CT	GCGATATATCTATGCTGTTCATCAGCTCCTGAAGAAGGTGCAA[C/T]ATTTCGATAACATTCAGATACAGTAGAAGTGACATGT
RM20091960333_62CT	ATGTTGGCTCACACGGTGCCTAACAACGAAGGGGTGAGTATTGCTGCATTACCTGTGTACA[C/T]AATCACTGTATAGCCTACC
RM20091960335_78AG	GGTGAGTTTCCGGAGGTCCCTCCGCCCCCTCTGGACATTGAGGGGTGAGGGGCCTGCAGTACCTTGTGGACTGGGAG[A/G]GGT
RM20091960336_35AC	GATCAGATTGTTTAGAATAATATACTGGAGAAGG[A/C]AGATGAAGTGAGACATCCCACACCCTCATTTGTAAGGTTTCCATGG
RM20091960337_28CT	CTTGATGATCTGATATGTACCTAAATG[C/T]ATTTGAAACTTGTAATACTCAGAAATACACAAAAATAAGCAATGAACCAAATC
RM20091960338_75GT	TGAAATATGTTTTCTCTCTTTTGTTTACGGAGGCGCTATCATTTGCATCATTTGCTTTTGCCGAAAAGCTTTTT[G/T]GAAATC
RM20091960339_71AG	GTTGGCTGGAGGCTAACAGAGGAGACTGGGGGGCCATCTTGGATTCCCAGACGGGTGCAGTCAATAGCCC[A/G]GGGGACGACA
RM20091960341_75CT	AAGTTTACAGGTTGTTGAGACATGTCCGACTGGGCACATGTCAATTCAACGTCTATTCCCTCTGGTTTTAATGT[C/T]GTTTTA
RM20091960342_80GT	TCTGGGCACTGAAACACTCGTCTAAATTACCCCCACCACAAAACCACACACCTTCAGCCAGCAAAGTACTCTCTCTCTC[G/T]C
RM20091960343_43AC	TGCAATGTTCGTGATTCTTGGTTTGCTCACTCACACTTGTAT[A/C]TTTTAGTTGAGTGGCTTCTTATCATTCATTTTTTCTCA
RM20091960345_70AC	GAGGTTTAACAACGACCTGGAACAGGTGACACAAACCTCTATGGTGACTAGAATTTCCACGGCAATCTC[A/C]CACTGACTTTA
RM20091960346_70AG	CATCAATGTGGTTGGGGAAACTCTTTGCAGGGCATCTCTTCTTGTGTTGAATCCTAAAAGCTTTATAGG[A/G]AAAACAAGAGG
RM20091960347_71AT	CCATTACACCCTCCCAGAGCTTTGTATGTGTGTGTGGCGCAGCATCCATCCCCCCCATTCCCTCCAGCAC[A/T]AGCCTGACAT
RM20091960348_22AT	GACAACTTTGAAGAGCCGGAC[A/T]GAGTCGGCTGGGTGAGTCGTGACCAGTTCATAGTGTAATGACAAAGAGGCAGAGACAGA
RM20091960350_32AC	GCCATTCCATTCCACTCTCAGACTTACCCAA[A/C]CTCATAGGTAGTTCTCATTGGAGCACACCATAGCAAAACATTTTGGAAC
RM20091960351_2GT	A[G/T]CGTCACATTCTGTTCCCTGTGCAGCGTGGCAACTGCATTGAGCAGACTCAGATCCCCTTCATCTAAATTCCCCCCGTCT
RM20091960352_61AC	AGTGCAGATGCGCCAGGTGATCGGCAGATGCGGCGGATGACTGGCAAATGCGGCATGTGA[A/C]CGACCGGCAACACCAATACC
RM20091960354_1AG	[A/G]GGTACCACATGAGGGAGGAAGATGTCTTCCCTGTAACGCACAGCGTTGAGATTGCAGGCACCAAAAGAAAAGTACTATCC
RM20091960355_22CT	ACTACTGGTCTCTTCCAAAGC[C/T]AAACTATTTTCATACATTTTCCCACAGGTACTAATCTTTTAGTGGCACTATCAATTGTC
RM20091960356_74AG	ATATACTGTGGATGCAACAATAACACACAGAGTCATTATTATAAGATAGATGCAAATGAATGCATGTTGATCC[A/G]TAATGTA
RM20091960357_47GT	CTCCAGGAGGGTTGGCCTCCCCTCATCTGTTTCCCAAGTGCTGAGT[G/T]TTGGAAAATCTTCTTGTTTATAACAATTCATTTC
RM20091960358_48CT	AGGAAGTACAAGGGCATGATCCTGGAGGACCTGGAGAACGCCCTGGC[C/T]GAGCACGCACCCCCCGGGGGGGAACTAACCTCC
RM20091960359_48CT	GACGTTCTGTAGAGAGTCCACCTGTTCATTGAGTTCGCGTATCTTTT[C/T]CTCTTTACCTGGCTGGCTGACCCCTTGTACCTG
RM20091960360_16CG	ATCCGACAAGGTGTT[C/G]TGTGAGGCTAATATCCAGTTCCATTGGATCTGGCTCCCACAGGTTTGCCACAGATAATGCGTTCT
RM20091960361_68AG	ACCGTGCTGCTCAGACAGGTAAAGGAGAGGTGGACGTGGGTAGAGATTGGGAGGTGTGGGCAGAATG[A/G]GAGGTGGGTGCTT
RM20091960362_81AG	TAAAGTAAGAATATTGCTCTGGAGCACTGAAGGCTTTTGACACTGCTGGGATTGATGTCTGTCTAATGCCTTCCCTCAAT[A/G]
RM20091960363_32AT	CCTAGGGCAGAGGAGAATTCACTTTAAAATC[A/T]GAGGCTTCTCATTGAAACGCATTAAACATAAAGCTCTCATGTGCACCGC
RM20091960364_69AC	GTGCTGTTGTTAGGGTTCACCTCCAAACCTGTGCTGGTTTCCACCAAGAGATTAGACAGAGGGAAGTT[A/C]TCTAGAGAAAAA
RM20091960365_34CT	AGACACATGAAGATCAGACTATTTTAGTAATTA[C/T]CTTCTTGAAGTGGCTCTGAAGTGGAATAATATTTTCAGCAGTTGCTG
RM20091960366_69GT	CCGAGCACAAAAAGAGCGTAGTAAAGTCTCTCACCACCCTAATCCCTCCATCCCTCAACTCCTTTTTT[G/T]ATGGCGTTTTTT
RM20091960367_13CT	GGCCTTCTTGAT[C/T]ACCTCCACCTGAGGATCACACCACCCACAGAACCATTACCTGCTTTATACCTGACCAGAAACACTGAC
RM20091960368_31CG	AAGGCACAGACATTGGCTGGGCCTTCTAAC[C/G]CCTACGTTTAGGAATTATCTATTATAATTAATTTACCCTAACCTTAACCC
RM20091960369_56CT	ACACAGGGCTGTTTCCTGCCCTCTCTCTGGCTCTAATTGAAAATGTTGGGTGGCC[C/T]GGCTGGCCCCTGCTTGTTTGTTTTG
RM20091960370_22GT	GAGCTCTGACAGGTTGGGCAG[G/T]AGCTGTGAGATGGCAGCGATGGCGTCGTCCGCTACGTTGATACAGTCGCTGACGCTGAG
RM20091960371_29AG	TCCCCAGGGTCCAACAGCACTGAAAGAT[A/G]ACAATACCACACACGCACGCATGAATGCACATACTCGCACGTGCACACGCTC
RM20091960372_25AG	TCCAACGAAGGGTGGGGGAGAAGA[A/G]GAGACGAAACGTCTCTCTGTCAGAATCCCTGTCTCCACATTGTGGAACTCCAGCCG
RM20091960373_32AT	AGACTGACTGAAACGCTTCTGTGCTTTGCGT[A/T]GCACAATTGAACTGCAGCACTCTGTTATACACCACTCACTGTAATTATA
RM20091960374_61CT	TAGAGGAGCGGAGACTTGCATGTGTAGAGTGGAGAACTGCAGGCGTAGAGGAGTGGAGCC[C/T]GCAAGTGTAGAGTGGAGAAC
RM20091960376_24AG	AAGCCTCTCATCACACTGACTGT[A/G]AGTTCAGGGCCTGGTTCCATTTCAGTCCCTGGTCACGTTCCATAGTTCCTACCCCTT
RM20091960377_58AG	GTGTCTTTGTTGTGATTGAGTAGGGGGAAACAGCTGTGGGCAAGGTTCTGACAGATG[A/G]GTGTGTCTTGGTGGTGGTACGGA
RM20091960378_16AC	GCTACAGTTGACACA[A/C]TCAAGACTGCTTTGATTCTCAATGAGTGACCTGGTAAAATAAATAAAAAGTAACATCTTTAGATG
RM20091960379_46AT	TATTGAGCCTCATCATTGGGTGGTGGAGCGGGGGTTTAGGGTAGG[A/T]GCAGCTGTGTGTGGCTGGGTGAAAGGGGGCCACAT
RM20091960381_26GT	TAGGCCATTGTGGTACATTTATAAT[G/T]AATTGTAGGACTTACATTGGTCATAAATGCTTATGTTATGTCAATGATCCTGACT
RM20091960382_28AG	GACTTCAGTCATCAGTTGACTTCAGTC[A/G]TCAGTGTTTCCTCCAATACTAGAGTGTGGCTGGCTTCCAGGTTAAGCGAGTAG
RM20091960383_60AT	TAATGCTTCATAACTTGTGAAAACTATGAGTATTTGTAACGTCTTATAACAGAGTTTAT[A/T]AACCTGTTAATGTTCCTGTAA
RM20091960384_12AG	TTGCCGTTCAC[A/G]CTGGCCGTGACTAAATTGAAGGGATATTTTGAGGTGTTCTTTGAGCAGCCCCCTCCTTTCAAGGTCTCC
RM20091960385_58GT	GTGGACTGCAGTGTGAGAGGCTCGACTCATTGGAGACTGTTCCAGACTACTTTCAAG[G/T]TGTGGTGGTCTTTTCTGGCACTT
RM20091960387_31CT	TGTGTGGACCCCAGTCAGCGTTGCCTCATG[C/T]GTGACAGAACCCTTGCACGCAAAAAAGCAATTTGTGAAATTGACAAGGAG
RM20091960388_23AG	TGGTACCACATGAGAGAGGAGG[A/G]TGTCTTCTCTGTAACACACAGCGTTGAGATTGCCTGAAATGACAACAAGCTCAGTCCA
RM20091960389_49AG	GTTTTCACTCAGGTCCAGTTCTCTCAGCTGGGAGGGGTTTGAACTGAG[A/G]ACGGAGGCTAACGCTTCACAGCATCTCTCTGT
RM20091960390_30CT	CATCCTGACATGATCCTCCAGCATGACAA[C/T]GCCACCGCGCACAGAACGAGCAGTATGGCTGATGTCAGTGTTCTGCCATGC
RM20091960391_35AT	GGATCAGCCCCCCGAGCACATTCAAAATACCAAA[A/T]CCAATAGTTAAAGGACAATTGTTTAGCAAATTTTGACTGCGAGGAA
RM20091960392_28AG	TCACAACTCTGGGCTTCATAAACCTAT[A/G]ATGGGGTAATATCCATTAAATGCCAGTCTTTGATTTTGTTTGATTAAATGACC
RM20091960394_47AT	TAAGAGCTCCTTGACTTGCCGCCTCAGACAGGTGGAGCGGAGGGAG[A/T]TAGAGAGAGTGTGTACAAGAAAGAGTGCGACAGC
RM20091960395_51CT	GACCAGACTCCCCTCCACATCGCGTCTCGCCTGGGGAAGACTGAGATAGT[C/T]CAGCTGCTACTGCAGCATATGGCCCACCCT
RM20091960396_46AG	CAATAGAAGCTTCATCTTCTTGATAAAGGCAGGAAGGAACCCAGG[A/G]AAACTAACAATCACTTGGTTGACTGTCTCCAATGC
RM20091960399_9AG	GGGATGAG[A/G]GAGCAGGATGTCTTCCCTGTAACGCACAGTGTTGAGATTGCCTGCAATGACAACAAGCTCAGTCCGGTGATG
RM20091960400_61CG	GGGAGAGTACCGGGCGGATAAGGTCCCCTCTGACCTGCTCACAGTGACAGTAAAGTATGG[C/G]AAGAGAACCACCACAGCCGT
RM20091960401_52CT	GAGGAACATGGTCTTGCTAATATGATAAGGATGCAACCAGAATGCGGGTGG[C/T]GGTTACTCATGTGCAGGACATAGAGTCTT
RM20091960403_57AG	GAAATAATTGAGTTTTAGATAACACATTGATACATGCCAACTGGCAGTGCTTATAA[A/G]GCAGAGATAAGTGCCTCGGGTTCT
RM20091960404_66AC	AAAAATGGAAAGAATGATAAGTCATTCATTCTAAGGTATGAGAAATTCTATAACAAAATGGTTTA[A/C]TATACAACCATCCAG
RM20091960405_75CT	CTATCTTTGTAAGAAAGTTAAAATCATGTCCATTCTAGTATTATAATTCCTTATTCTGTGTTGTAGCCTATCTG[C/T]GATGAA
RM20091960406_47AT	TATTGCCATCTGAAGCTTTTTAAGTGTTGTGGGGGTTCCTCAATTC[A/T]ATTTTTTCCATCCCATATCTATTAACACGTCTCC
RM20091960407_46AG	CATCCTGACATGAGGGAGGAGGATGTCTTCCCTGTAACACACAGC[A/G]TTGAGATTGCCTCCAATGACAACATGCTCAGTACG
RM20091960409_4CT	TCA[C/T]AAGTCGATGAGGCAAAACACCAGGAAGTGAGGTCACGGGCTTTGTTATCTTGGCTGCGATCAAATTTTCATTGGTTT
RM20091960411_38CT	GCGGCGATGTGAAGATCGAGTCCCAGAAAGTGAACTT[C/T]AAGGATAAGGCTAAATCCAAAGTGGGTTCAATGGACAACCTGT
RM20091960412_63AG	TGAAATATGCTATTCTCTCTTTGTTAACTGTTGTGCTGTCATCAGATAAAATAGCTTCTTAT[A/G]CTTTCGCCGAAAAGCCTT
RM20091960413_76AG	GGGTACCACGTGAGGGAGGAGGATGTCTTCCCTGTAACGCACAGCGTTGAGATTGCCTGCAAAATGACAAGCTCA[A/G]TCCGG
RM20091960414_18AG	AGGTACCACACAAGGGA[A/G]GAGGATGTCTTCCCTGTAACGCACAGTGTTGAGATTGACTGCAATCACAACAACTTCAGTCCG
RM20091960415_61CG	AGGCTGCACCAGGAGAACTCTCATTGGTTCTGGTGGTCCTGATATGGAGGGGTCCTGAGT[C/G]TCACAACGCCAGTGGGGAGG
RM20091960416_42CT	GTCTTCTCAGCACCATCAGGGCAGTCTCCTGGGCCATATGA[C/T]GAGGCCATTTGTTTTAGGAGCCCGGTACTCATCGAAGAG
RM20091960417_38GT	AGAGAGAAATGCATCAGTTCCTCCTCACTTCCGTCTC[G/T]TCCTCTCTCCATCTGAGATTAACAGTAAGGTTACAGTGCTTGG
RM20091960418_78CG	ACCCAAGGAGACTTTTCAGACTTGTATGGGAATCGATCCCATCATCTCGAAACGAAGTGCAAGGATAATAGAACAAC[C/G]CAA
RM20091960419_27AG	CTACACAAAACGCAGAAATAAAATAT[A/G]AAACATGCCTTACCTTTGACGAGCTTCTTCACATATAAAAAATATTAAATTCCA
RM20091960420_18CG	AAACTGGGATTGGAAAA[C/G]GAAGAAAGTTGTATTGGATTTCATCTGGACAACCCAGGATGCATCCCAAATGTCACCCTATTC
RM20091960421_81AG	AATCTAGTTCCCTTTCCTCTTCTACTCAGTGGGGTTATTTCCTCTTCCACTCAGTGGGTTTATTTCCTATTCTACTCAGT[A/G]
RM20091960422_34AC	CAGATGGATAAATAGTTTGCTAATTCAAGACTA[A/C]GAGTCAATAGCGGCGTCTAACTGGCCTGCCTATCTGTCGGTCTGTCT
RM20091960424_47CT	CTCGACCAACTGTTTAACACAAACACACATTGTTTTCCTTTAAGTG[C/T]CACTACAACCAGGAGGTGCAGTTTAGTGAGTGTG
RM20091960425_43AC	CAACAGCCTGGTGGTGATAGAGGGGGATGAGTGTAAATACAT[A/C]TTTAAACCTGGTACAGACTGGCCTGTGAGAAGGGGAAG
RM20091960426_64AG	CACGGTCTGTCTGTGTGTTTGTTTATGTGTGTACATCACAGGCGGCCGGCGGCTCCTTCATTG[A/G]TGAGGACGGACTCGTAG
RM20091960427_25AG	GTACTTCTTCTCCTGAAAGACAGG[A/G]GGGCACGGTGTCAAATCCAGACCTTGGCGAGCAAGGCTGCACTAGACTAGTAAAAA
RM20091960428_12AC	AAGTACACGTT[A/C]ATCTCGGCAGGCATCATCATACCTGTGGGAGTGGTGATGTTCATCATCGGGACTGTGGGCTGCTACGCC
RM20091960429_78AT	GTGATGGCAACGTTAATAAATACTCTATTAAAGAATATTTTGTATGCAAAGTTTGCATTACAGAATTAACTTCCCAA[A/T]CCC
RM20091960430_17AG	GGGGAGCAGAGAGAGA[A/G]GATAGGAAGAGATGAAGACATGACGAGACACTCATAAAACAGAGTGCATCAAACACTATTTATT
RM20091960431_11AT	ATAAAAATTG[A/T]TTAAGTGAAATAATATATAGACATTTGCATAATAAGATGATTGACATTTGCATAATAAGTATTGATATCA
RM20091960432_11GT	ATCTTCAACA[G/T]AAGGTTTGAATGTTCCCATATTAGGAATGGTTTAAATAGCCAAAAATAAACAAAACTTTGCAACGGTAAT
RM20091960433_31CT	CTTCCATTCCTGTGGCGGTCCTCATGAGAG[C/T]CAGTTTCATCATAGCTCTTGAGGGTTTTTGTGACTGCACTTGAAGAAACT
RM20091960434_35AC	GAACCGTGACACCCCCCTCCTTAAAATGAGGGTT[A/C]CACCCTCAACCCAACTTCCTCCAACCTATTCAAAACAATTCAAATT
RM20091960435_70AG	GCGTCAGCGACCAGGGATCCAGTGTTGGGCATGAAGCTGACTGACATGCTGGCGGAACTGCAGACAGAT[A/G]CACCTGGCGAA
RM20091960437_58AG	CCCATCCAGCAGTTTGCAGATAAGATCAGTGGCTACTTTGTCCCGTTCATCGTTGGG[A/G]TCTCTCTCCTCACTCTGTTCGCC
RM20091960438_52AG	ATTGTATGGTGTGAGGCTGGGTGCAGGTAGGAGAGAGGGAGCCAAGCCGGT[A/G]CAGGTCAATATTTGTGGAGCTGCACAGGC
RM20091960439_81CT	AGAGTCATGGGGGAGGCACTGGGATATGGTCAGCTGGTACAAGGAGTCGTGCAGGGCGGGCGAGGGCTGAGGTGGCTCCT[C/T]
RM20091960440_54CT	GAATAGGGCCAGGCTGGGACTGGGGAGGAGGGTTGGAATGTGCCTTTGATCTG[C/T]AGGCTGTCTGGTGCTAACCTAACCTCC
RM20091960441_81AG	AAGAGGTCAAAGGTGAGTCTTCATAATCCTTAACACTGGTGTTCCATGATGTACATGTCAGGTTAAATATGGCTTTACTC[A/G]
RM20091960442_61AG	GCCAGGGCTCGGTAAAGAGTCCCAGGCAGTGGCCCCGGCTGAAAATTCCCATTTACAGCT[A/G]GATAATCTGGTTGCTGTGAG
RM20091960443_79CG	GGTGAGGTGCCGGAGGTCCCTCCGCCCCCTCTGGACATCGAGGGGTCCCCGGCGTACACAGTACGTGCGATTCTCGAG[C/G]GG
RM20091960444_31AC	AGACAGTGGCCTTTAGAATGTGACACAGCC[A/C]TGTCACAGTGCATCAGTGACCTTTATCCCTTCTGACCACAGTAAACACGG
RM20091960445_69AC	TCTGTGTCTATGAATCTCTATTAGCCTTGAGGCGCTTTCTCACAGACACCCTATTTTTACTGCAATAG[A/C]TCACACCACTCT
RM20091960446_71AC	CTTGACATTGGTATAATCACCTTATGTAAATCTTGCAAATGTTACGTAACCTACCTTCGTCATTACACTG[A/C]AGCAGTAGGG
RM20091960447_31AG	CCACTTGTGACATTTTTCCACCTGTACTCA[A/G]CATTGTTGCCTTGACATTGTTGTATCAGTAAGAGTGATGCCTCTGCAAGG
RM20091960448_15CG	CCTACCTGAATGTT[C/G]ACCAGACACTGTAGCCCTCTCTTGGTGGTCTATAGACAGGTAGCAGGTGTTACTAAGCAGCTGTTT
RM20091960449_66AT	GAAGAGACACATTGGTACACAGGATAACACACACACCTTAATCAATGGGCAGGAATTCTCTATAG[A/T]CTCTATATAAATTTC
RM20091960450_7AC	CATCTT[A/C]AGGGTGTTCTGTTTCAGTGTAAATGAAAACATTTCAAGAGAAGCAGCTCTACCTCTTGAGTGACTTCAGAAAAA
RM20091960451_34AG	TCCCTGGCACAGCTCCACCAGACCCTGGATCAG[A/G]TAATACTTGGCCTCTGCCAGCAGCTCCAGAACCCCCTGCCTGCCAGG
RM20091960453_45AG	TTAAGTAAAATGTTACTGTCATACACTTATAGAAGGAAAACAGT[A/G]AAGGAAAGAGAGCAGAAGAGAGGGAGAACATGAAAG
RM20091960454_81AG	AGCTGGGAGCATCTAACATCCCCTCTTATTAACTTCCTAACCCCAATGTTTGATGTTGAATAATTCCACTTGGGCTCTCA[A/G]
RM20091960455_22AT	ACAACCACACCAACCATTAAT[A/T]CTATGTAGGAGGAATAACCATATTCACAGAAGACTGGTGTGAGTGGGTGTGTGTGTTGA
RM20091960456_74AT	GAAACAATAGAGAGAGGTATTTTATATAGAGTAGAAATGATAGAAGTATTGAGGAAAGCTACAATAGATGTTC[A/T]ATTGTAG
RM20091960458_40AG	GGTCAAACTAAAAATAGCATGGGGAATCCTCTCCAGTTC[A/G]CAATTGTGAAGCTCCAGTTCAGCTAGGTTCATCATTTTTTT
RM20091960459_9CG	CAATAACA[C/G]ACAACTACAGCAACAGGTCTAGATGGAAAGAGGAGGGGTGTGACAGAGAGGGAGAGGAGTGTATTTTAGAAC
RM20091960460_27AC	GGGTACCACATGAGGGAGGAGGATGT[A/C]TTCCCTGTAACGCACAGTGTTTGCCTGCAATGACAACATGCTCAGTCCGATGAT
RM20091960461_39CT	AGTGTATCTGTGATATGTCACATGTTTGTGAAAATGCA[C/T]TAATACGAAGTAGCTGTTAGGCCTCTGCATTCCATATCACAA
RM20091960462_10AG	CAGGACCGC[A/G]ATGGGGAAGAGGCGCTTCTCAACAACCAGCTCAACGAGCAGAAGACGCCAAATGGCCGGGCGCATGCCAAC
RM20091960463_1AC	[A/C]TCACTGCAAAATAGCTGCAGATTAGGAGCAGCACGTGGAGGGGTGGATGGGTGTGTATGAATGTACAGTACCAGTCAAAA
RM20091960464_63AT	CGTCCCTCCAGCCTGTTCCAGACCTCCTGTATTCAGACTGACATCTGACCTAAAAACACCAG[A/T]TTTTGGTTTCACAGAATA
RM20091960465_32GT	AAGCTCTTTCACGTGGGAGATGTTGTGGAAA[G/T]TGTCGGGCAAGAGGACATTGATCATATTGTAGCCCAGTTTGAGGGACTC
RM20091960466_72CG	CACAGCAGACCCCTGTGGCCCCTCACAGAAACAACAATATGAAAGAGTGGAATGCTGCAGAGCAGACCCTC[C/G]CATTAGCTG
RM20091960468_50GT	TGAAATGTTTTCTCTCTTTAGTTTACTATGGTGCTATGCTCAGATAATA[G/T]CTACGTTTGCTTTCGCCGAAAATCCTTTTTG
RM20091960469_18AG	ACATAACAGCAGTATTA[A/G]AGTTACTGTACACACACACACAAACTGACAAACTCACAAACTGTCTGTGCACAAATGGAGCCA
RM20091960470_38CT	GGCCCTGACATGGCCATTGTACTCCTGCCCCCAATAT[C/T]TGTTCCTGTTTCACTCTGAGGTTAATCACTCTCATTAATGTAT
RM20091960471_28AG	GAAGAAAAGCAATTTAATTCCTATGCG[A/G]CCTGTTTATCTCAGACCAAAGTCAAATGAAGCAAATCAAACCTCTTACAAATA
RM20091960472_47AC	GGTTTAAGACAGACATCAGCAATTGGATACACCTCTCCTTTACAAG[A/C]TTTTAACTGACCCTAAAGTGTATCATGAAGATTC
RM20091960473_67AG	CAGACATAAATGTAATTAGCCTAAAATATTAGTAAAAATAATCATTTTGAGAGAGGATTTACCTTC[A/G]AGTCTTCATAAAGT
RM20091960474_54AC	CTCTAATGTGCTTAACAATAATGAGATTCATCCCCCTGTAATTCTTTAGCTTC[A/C]GCATTTTATTTCACTAGGCAAGACAGT
RM20091960475_78CT	GACAGCGTGACGGAGCTGGTCCAAGTCTGCTGGGTCTGTCATGGCCAGTTCGTACGATAACGACACAAAGCGAGACC[C/T]AGA
RM20091960476_35AC	ATTGCGTGGTGGTGCGGGAGGGCCTGACCAACCC[A/C]TGGATACCTGACAACTGGTCGTGGGGCGGGGTGGCGTCCGACCATT
RM20091960477_52CG	AAGATGAAAAATAACACTACCACTACTGCTCAGTGTCTAATTTAGTCAAAC[C/G]TAGTATGCAAACACCAGATTAATAATTCT
RM20091960479_60AC	ACATCTGGTCTTTCTGAACCCTGTGGAACAGTATAGTAGTGTACATTTCCTGAAAAATT[A/C]TTTTAAGGGTCTGATATCAGA
RM20091960480_53AG	AGATACACCCCTTCCTCCTCCCTCATGGTTTAGGGTTCTGGAGTGTTCTGAT[A/G]AGTGTGATTCTGGGATTAGGGATGGTGT
RM20091960481_40AG	TTGGGGAGTACCAAACTGCAGCTAATAGCAAAGAGTGGA[A/G]CATCAAGTCTTCCTGTGGATTCAATTCACACACCAAACCAA
RM20091960482_43AG	TGTATCTCTCGCCCTCTCGCTCTGCTACCCCTCTCTCCCTCT[A/G]TGAGCGTGCCTCAGCCCACTGCTGTGCTCTGCTCTGCA
RM20091960483_4CT	CCC[C/T]TCTGGTACTGATGGATGGATGGAGTACGTGCCCATCTCAGAGAAGAAGAACTTCACCCTGGCCCCGCCACAGGAGCT
RM20091960484_53CT	GATGAGTTAGTTAGTTAGTGCATGGTGTGACTGACTGACCCCCTCCTGTCCC[C/T]TGCTCCTCCTCCTCTTCTTCTACCGCCT
RM20091960485_7AT	AGCTGA[A/T]CTGAGACACTCACCAGATGCTGTTGAGGATGAAGAAGAGCTGGATGAAGATACAGCCGAACGGGAGGATCCCCC
RM20091960487_7CT	CTGTTG[C/T]CCCGGCTGTAGGAGGGCACAGAGGAGCTCCTCTGGGAAGCGATGGAAGTGTCTCACCTGCTTTCCCTGCTCTTG
RM20091960488_24AT	TTTTCGTAGCAGGGCAGCTATCA[A/T]GTGGGTTGTTTCTGGAGTGGGACATATAACTGAAGACATTGATTGAGTGGTTGGTGC
RM20091960490_39AG	GGGTACCACATGAGGGAGGAGGATGTCTTCCCTGTAAC[A/G]CACAGCGTTGAGATTGGCTGCAATGACAACAATGACAACAAG
RM20091960491_25CT	CCTGGCTCGCCACAAGGAGTCGCG[C/T]GATAAGCCATGTAAAGCCCCACCAGCCAAACACTCCTCTAACCTGGACGACACTGG
RM20091960493_21AG	TGGGGGTGGGGATCTCTATG[A/G]GAGGGGCCTCCGTCACCACCTTCTTGGGGCACTGGAATTAAAAAACAGTGTTACCGTCTG
RM20091960494_21AG	ATCGCACAGTATTTTTGTAA[A/G]GACTGAACCAAGTTTTCCTCTAGCCCTTACAAAAAAGTCCTACAGGAATCCTGCAGAATA
RM20091960495_9AG	AGACATGC[A/G]TCCGCCAGACCCCTACTAATGCAGTGGTACTATACCTCACTGAGATTGGGCCATCCCGGAATCACCAGGACC
RM20091960496_21AT	AGTTATGGTTGGCTGTCGAC[A/T]CTGAGCTCAAGAACATCTGGACTGAGGGAGAAATTCAGATAAAAATGTAATTCCTACAGT
RM20091960497_33CT	AGACATGGAAAATAATATATGACATAAAATCA[C/T]CCCCCTGGTACCGTTTGAGCAGTTTCTGAATGGTTAGTTAATAACGTC
RM20091960499_49CT	CACCCTGACATGACCCTTCAGCATGACAATGTCACCAGCCATACTGCT[C/T]GTTCTGTGTGTGATTTGTCAGTGTTCTGCCAT
RM20091960502_40CT	ATGCCAATGATGCCATGCTGTAATTGTTGTTGGCCATCA[C/T]TGATGATTCCTGTTCCAGCACTGGGGAGGTGAAACCACAAG
RM20091960503_39CT	CGAACCTTTGCACAGAGCTCTTAACCAACCCAGAGTCC[C/T]TCTTCTCTACCCTGTGAGTCATTTGTTCTGGCCCCCGAGCAT
RM20091960504_69CT	GATGGCTCCCTCCAGTGGCACCCAGCCCACCATGCTCTTCTTGGCCGCCTCGTCCTCCCTCTCGCGGC[C/T]GCAGCGCTTGAA
RM20091960505_34CT	GTCATCAGTTGAATGGTGTGTCCTTTGCATTAG[C/T]GCAGCTGGGTGTTTGGTGGGACATGTTTCAGATGACACATGACTCGA
RM20091960506_60GT	AGAAACAATAGCATTTGGTGTGAAGGGTGGCAGGATGTTTACCTATTGTTTCATTTTGA[G/T]CTATAAGTCAATATGCAAATG
RM20091960507_4CT	GTG[C/T]CATAGTAATATGTATTTATATATCAGAGGGTCATTACGTTGCTATTGTTAGAGAAAGGCCCGTTGGAAGTTTCCTGA
RM20091960509_29CT	CTTGATCTTCCTCACCACCCCCTGGTGC[C/T]GCTTCTGCACCTCCGGCAGTGCCGCCTCAGCCTCCCGGCAGGCCTTCATGAT
RM20091960511_13CG	CTGTACCACAGA[C/G]GGAGGGGCCACATCTGTACACAGGAAGTGATGTGCATCCACTGTCAGACGGAAGTATCCATCAACGAG
RM20091960513_32CT	CATCCTGACAAGACCCTCCATTATGACAATG[C/T]CACCATGAGCCATACTGCTCGTTCTGTGCATGATTTCCTGCAAGACAGG
RM20091960514_32AG	CTATACTGTAGGTTCCAGGCTTTACTCAGCT[A/G]GACCTCACCTGAAGAAAGCCCTGGATCAAGGTTGTCCCTAATGAATGTA
RM20091960516_33AC	TTTAAAAGTAAGGCAGTTAGTTCTCTGTTCTT[A/C]ATCCACGTAAGGGCCTTCAAAGACATCAAAACCATTCCTCGAACTCCA
RM20091960517_5AG	TCCT[A/G]TCTGGAATTAGCTGCATCAGCCCCCAGCAGCCCTCAGCCTAGGCTGTAATTAGGAGATTTGGAATGTGCTCATTGT
RM20091960518_72AG	AGTAGGAGTGGTATTTATCTGGCCGCGCGGCTGATATGACCCCGTATGAATGGTCAGCATTCTGCCGAGTC[A/G]GCCACATTC
RM20091960519_60CG	GCGATACGTTTTCTCCTAGCCTTCCCTCTCCAACACTGCAGGCAGCGATACGTTTTCCC[C/G]TAGCCTTCCCACTCCAACGCT
RM20091960521_31CT	CAGCGTCTGGTTGACAAACCTCAGCATGCC[C/T]GTCAGGGAGCTCATGTCCATCTCCTCCTGGGTCTCCTGCCTGAGGGGGGA
RM20091960522_45AC	TTCATAGCAGAACCATTCCACCAGCTTTCCTTCCCTCCTCCTGG[A/C]GTCAGAGGCAGCCCCGGGCTGGCTTCCTCCACTTGG
RM20091960523_11CT	CGACACAAAA[C/T]GTAGAAATAAAAATATAAATCATGCCTTCCCTTTGAAAAGCTTATTTTGTTGGCACTCCAATATGTCCCA
RM20091960525_36AT	TCTCCTTGATGATCAAGGGACTGTAAAATTGCGAT[A/T]GATTATTCAGTTAAGCGTGAGAGAGGCAGAGCAGGGGGTAGGAAC
RM20091960527_52AC	GAGGTTACAACATAGATTTTACAAACATGGCAGAGAGAACTTATTACTTAT[A/C]ATTTTTTTGTCAATTACCTGGTCAAGGTC
RM20091960528_12GT	GTAGAGGACCT[G/T]ACCAGGGAGGAGAGGACACTAACTGACTCACTGACCCTGCCCGAGGCTGCTGCCGTCACTGCTTTAGCC
RM20091960529_61GT	CAGGAAGCATATTTCTGGTGCATTATTTTTCTCAGCCTGGTCACTAGAAATAGCCGTTGA[G/T]TAAGGATGTTTGAATAGACA
RM20091960530_81AC	ATTGACCTTTTTTTCTAAATTTGATACAAGAAGTTTGAAAATCCCTCTACGCCCGGAAAACACGCACGCACACACGGACA[A/C]
RM20091960531_22AC	TACACTCAACTGCCTAATTTT[A/C]TTTTATGACATTTGTTTTGTGTTTTCCCCAGAGAGTTTGAGAGACACCTAGATGTTTGG
RM20091960532_58CT	CATGGTAAGACCAGGCACAACACACATGAATATGGGCATGAGTGACACACAGTCTCT[C/T]ATGTAAAGCTGACAGGCAATTTC
RM20091960533_73GT	CCCAGCTCTACCAGGTGAGTGAGCAGAGCTGACCTGATGGGAACACTGGTACAGCTTCTTTGTCGTGCTATT[G/T]GTGCATGA
RM20091960534_50CG	ACACAGTAAAGCCAGTCTGTTGTGTATATGTTACTCATTTTATTATTAC[C/G]CATTCTATTTTTCTATAATTTCTTTATTTTC
RM20091960535_80GT	TAGAATGACTGGACTGACCTGACCTGATAAAGCACTGCCAGATACACCTGGACAGGCGGACAGACAGGACAGGAAGGCG[G/T]G
RM20091960536_16AG	TACACGCTCTGCTTC[A/G]TTTCTTCTCTCCCTGGCACTTAAAGGAAAAATCCACTTAAAAACAATGTTTTTGTACTTTTTCAT
RM20091960537_36AC	CGACACAAAACACAGAAATACAAATATAATTCATG[A/C]CTTACCATTGACAAACGTCTTTTGTTGGCACTCCAATATGTCCCA
RM20091960538_32AG	TTGCACCAGTTGAATACATTAGTGGCAGGAA[A/G]GAGCCAAGACCAGATGGGATATGAAATGATCTGAGGGACCAAGAGGGTT
RM20091960539_71AG	ACTGAGAAGTACAGGTCTGAGTATAACAAGCTGCGGTACGACTACACCTTCCTGAAGTCTGAGTTTGACC[A/G]CCAGAGAGAG
RM20091960540_77AG	GACAGCGTGGCGGAGCTGGTCTAAGTCAAGTCTGCTGGGTCTGTCATGGCCAGTTCGTACTATCAAGGCACAAGGC[A/G]AGAC
RM20091960541_6AT	AGGGT[A/T]ATAGAGAAGAGACATGATTTACTCTCAGCGTTTAGTTTGGAGGAGCATCTATTACGGAGATACACACACACACAC
RM20091960542_10AG	ACGGCCCTC[A/G]CAGATGTGGGCGTCGAAACAGGACTTCCAGGCTGGGTACATAGTGGGTTTCCTCTGGACCAGGGTCTTCCC
RM20091960544_65AG	CCTATAAAGTTTGTACCTCGATCAGAGCGTAGCACTCTTGCTGGAACACGGATAGTGAAAAAAC[A/G]CCTCAGCACTTTGATG
RM20091960545_67AT	ATGACACACTTTTTTTTGTCCAGAAGGGACAAGAATGGCCTTTATCTACAAAGATAACAAATTACT[A/T]CCACATAAAATAGG
RM20091960546_12CT	TTGATGGATCA[C/T]GGATGTCGAGTCAGGTAGCTCGAGACGCTAGCTAAGCAAACTAGCTAAAGTTAGCTAGTCAAGAGGCAT
RM20091960547_31AG	ATTGGTGGGTGGAGTAGGAGAGGTGGGCGG[A/G]GCTGGGAGGGTTGTCAATGCTGATGGGGCACACCTGTTGAAGCTCAGCTG
RM20091960548_21CG	CAGAGAGAGCTGTTAGAGTG[C/G]GTCCATTTCAGCTCATATAGAGACAACAGGCCCTGATGAGCCCAGCCAGGAGGGCCCACT
RM20091960549_49AT	GGGTACCACATGAGGGAGGATGTCTTCTCTGTAACGCACAGCTTTGAG[A/T]TTGCCTGCAATGACAACAAGCGCAGTCCAAAG
RM20091960550_47AC	TGAAATATGATACTCTCTCATTGTTTACTGTTGTGCTATCATCAGA[A/C]AATAGCATCTTATGCTTTCGCCGAAAATCCTTTT
RM20091960551_1CT	[C/T]GACACAAAACGCAGAAATAAAAATATAATTCATGCCTTACAGCTTCTTTTGTTGGCACTCCAATGTCTCATAATCATCAC
RM20091960552_21CT	CTGATGTCGTTTTTGTTGGA[C/T]TCCCATGTTCTCTTCTATAACAGACAGACATTGGCATTCCAACCGTGTCAGTTACGCTGG
RM20091960553_61CT	TAATACTGTACCTCCAGCGAGGGACACCACAGTGGCCTGAGCAGCATCCTGGTTTCTGGA[C/T]ACCACAGCAACCCTGCAGTC
RM20091960554_33CG	GATGACAAGCCTATGATAGAGGTGATGGACCA[C/G]CTCAGTCCTGCTGTTATGGACAGCTTTGTACACGTGGCTGTGTCCGAC
RM20091960556_24AC	CTGACCATAGTAAGCTGTTTATT[A/C]TCTGTGTTAGTTGGGGCGTGATAGTGACTTAGGTGGGTCATCTAGGTGAAATGTATT
RM20091960557_73AG	CTCATATGAGAGCGAACGAAACCTTGCCTGTGTGTGTTCATATTTGTACATGTATAGGTGTGTGTATACAGT[A/G]GGGAGAAC
RM20091960558_21CT	TCCAGGTCAACCCTACAGCT[C/T]TCAAGCTCACCCTTACTGCTCTCCAGCTCAAACCTAAAGCTATCCAGCTCACCCTTACTG
RM20091960559_74CT	TCTGATCTTGGCCTTTTTTTCATTGAGCACCATGACGAAACAAGAGAACAGGTCTCCCTGTCATCTCAATCTC[C/T]TGGACAT
RM20091960561_6AG	GTTCA[A/G]GCTTTTGTTTCAGACCAATCCTACCACACCTGATTCTACCTCTCTTGGTCACGTTGAGCAGTTGATTAGTAAACA
RM20091960562_63AG	CCAGTTATGTCTTGTCTTGATTATTGTCCAGTCATGTTAGTGCTGCAAAGAAAAACCTAGTT[A/G]AAACTAACCTCTCTCATG
RM20091960563_31CT	AAAGGGTGGGGGCCAGGCGTGGGGGGCCAA[C/T]CAGGATGGAGTAGTGAACAGTCAGCCAGGGGCCCGTGTGGTGGACGAACG
RM20091960565_66AG	TACCTCCACAACTTCCTGTCCAGCGGATATCGCAGCCTCGACTGTGTCAAGAACCTGTGGGAGCT[A/G]GAGATTGTCAACGTG
RM20091960566_79AT	ATAAACAGTCATTTAACACTCTCCCAGGACAAAGGCCGAAGGTCTAAGGTCATACATGAAGGTCAAGGTGAAAGTCAC[A/T]CG
RM20091960567_56AG	GTCAAAGTTATCAGAAAAAAAGGGGAATTCAAAAATATTCCTGCATTTGCTGAAC[A/G]GTGGCATTCAAGCCTGAACTAATCT
RM20091960568_77AG	TGGTGCAAACGCCACAACATTTCTATTCCGAGGCAGGCTTTCTTTTCGAGGCGTGGCTGGCTTTTAGTCCAACACT[A/G]GCTT
RM20091960569_74AC	TCGCAGGCATCCCGTGGGATGCAGTCAGTACACAACAATATGCTCATCCTATCTTAGCAGGATCCGATGGTGA[A/C]ATGGGTC
RM20091960570_24CT	CAATGGACAGACGCCACTTTATT[C/T]AACGGGAACTGAAAAGAACATAACATACCACAAATCACAGTTTTTACGAGCCATATT
RM20091960571_3CT	TT[C/T]CCCCCGGCAGAATTAAGAGACAACTATCAGCGTCCTGCAGACAGCTCCTCTCTGCCTCTCCTCACCTAACCCATTATT
RM20091960572_65GT	GAGGTTACAAAATACTTTACAAACATGGCAGAGAGAATTCTACATATAGAGTTCTACATTTTTT[G/T]GGTAAATTACCTGGTC
RM20091960573_16CG	CACACAGATTATAAT[C/G]TCAGATTACCAACACAGTTTACCATCACAGATTACATAATCCGAATATATCCCAGATGATCAGAA
RM20091960574_33AG	GGTGAGGTTCCGGGGGCCCCTCTGGACATCGA[A/G]GGGTTCCCGGCGTACACGATACGGGCCATTCAGGACTCGAGACTGAGG
RM20091960575_69GT	TCTCCAGACCAGGTGATGCTGTCCCACAGTCCTTTGCGTATGTTCAGTCAGTATCACAACATGTGTGT[G/T]CTGGTGTCAGGA
RM20091960576_74GT	CATCAGCACAGGTGGCGGATTGGTGGCTTTGACAGAAGCACGTAAACAGGCTGAAAAACAGCTAATATCTACA[G/T]ACTCAAG
RM20091960578_21AG	TGTGGCTGTTCTACTACACT[A/G]CATGTAGAAATGATGAGGAAATAGACAGGAACTGGTTTCATCTTTGGAAATGATCACATA
RM20091960580_43AT	GTTCTGGTGGCTAAGATTGTAACGTCCCCTTATAATGTCATA[A/T]TCATGTGAATAACAGTAGCATTCAACTTATTCAGTGTG
RM20091960581_39CG	GCCCTTCACCTCTCTGTGTTTTTTCCTCGGTCTCTCTG[C/G]AGCCTGTATATTAAACCACTCCTGTTACTCAACCAGCTCATT
RM20091960582_41GT	ACTTTCTGTCGCTCTCTTTGTCTCAGTCATTCCCTTTCTT[G/T]TGATTTCTTTCCCTTCCTCTCTCTTTTACACACCCCACAT
RM20091960583_1AC	[A/C]ACAGCATAGGCACTCATTACAAATACCACACAAACATGGATGATCCTGAAAGTAAAAGACAGAGGTGGTATATACACTAT
RM20091960584_8AT	ATCGAAG[A/T]AGCATAATCAAAAAAATATTTTAAAAAGTTTAAACTGGAGTTATCTGTTTTTTTGCTTTGGACGGTGGATTAA
RM20091960585_62AC	TGAAATATGCTACCCTCTTTGTTTACTGTTTACTGTCTTATGTGTAGCTTTAATTGAGTAT[A/C]TTTTCATGTGTGATTTAAT
RM20091960586_15AG	GCCAACTACATTAA[A/G]GACCAGTCAGTGAATACTCAGGCTATAGTGATCTCTCTGAAGGAAGAGTTCTACACCAAGGCTGAC
RM20091960587_49AC	TGGAACTACAATACAATGCTAACCCATGGTAATGCAGGAAACACAGAT[A/C]ATCTGCATGGAGTTATGTTAGACCAGAGAAAG
RM20091960588_13AG	AGCGTTAAAGAC[A/G]ACACTGTCAAAATCACATTCATTACCCTCCTCAATAGCCTCCTCAGTCAAGCTAGGCTGTATTCACTG
RM20091960589_46AG	AGCCATCTGATCATTCAGCTCCGTGGAGTCTCCCTCCAGCTTCCT[A/G]CGGCTCTTTTCAAGCTCTTGACGACTCTTCTCCTC
RM20091960590_52AT	CACCCCGCCGTGATCTGAAAAGACAAAAGGCAACAGATGCCCAGACAACTG[A/T]CCCAAGAACCTGGATAGAAAAATATTGTC
RM20091960591_32GT	AAGAGTCAGGAGGACAGTGGTCTGGAGTCTG[G/T]CTTTTGTCAGCTGAATGGTTGAAACTAACCTGTCCCTCCTATCATCAGG
RM20091960592_19AT	GCAAAGTTTGTCAGACAA[A/T]TCACTGGGTCGAAACTACAGAACAGTACAAAACAAGCGAACACACATTAAGGATCGGCCCCC
RM20091960593_10AC	ACCCTGTCC[A/C]AGGCCAACGCTGAGGTGGCTCAGGGGCCGTTACAGTCAATACTACTCACCAATGTGCTATCATTGGACAAT
RM20091960595_55AT	GGACCCTCATGAGGGAGGGGGACCCTCCACCTCCAAATCGATCCCGCTCCAGAG[A/T]ACAGGCCTTGGTGTAACGCTCATTCC
RM20091960596_55CT	TTTTACACCATGTTCCCAAAATTGAATATATCTTGCAAAAGCAGTTTTGAGTTT[C/T]GATTCATGGTGTTGAATTGTGACTGC
RM20091960598_20CT	CACCTGTTATCATCTGATT[C/T]TGCTAAGACATAATGAGCATAGTGTTGTGTACTGATTGTGCATCATGACAGTGTAGTCTGT
RM20091960599_10CT	CCTATAGCC[C/T]CCCAGCCCATAACCTCATTTCGATGGGGGCCTTTCAAATGAATACCTTTGTTAAAGCACTAAACACAAAAC
RM20091960600_49AC	CATCCTGACATGACCCTCTAGCATGACAATGCCACCAGCCATACTGCC[A/C]GTTCTGTGCATGATTTCCTGTGAGACAGGAAA
RM20091960602_36AG	GCATAAACTGGCAGAGAACTTTTCCTTGCAACAAT[A/G]TCTCTGGAAAACTTCCATATTATTTCCAGGATTATCTTCTTTGAT
RM20091960603_16CT	TTGGAGGACATACTG[C/T]ACCCCACATGACTCGGGCACAACCTCAATACCAGTGCACCAAGAGCAGAACAACCGCCAGCACAA
RM20091960604_66AG	TGCATTTTGCAAAAGCAAGAGGAAAAAAAGTCTCAAGAGAGTGAGAACAGAGAGGGGAAAGAGAG[A/G]AGGATAAAGGGGAGA
RM20091960606_62GT	ACAAACACAAATAGTACAAGAATAAATAAAATGACAAGTCATGGCTTCTTCATGTCTTTTT[G/T]ATGTCTGAATTGCCAGTCC
RM20091960607_81CT	GTTTGCTGTGGGTCGTCCCGGCAACTGTTTCTGCTACTTCTGCAGATCATGTTGTTTTGAGCAACTTTATGGGTCTTTGA[C/T]
RM20091960608_5AC	GCTG[A/C]TGGACATGCAGGAGAAGGTGAGAAAGTACACTAAAATGTTGAGCGAGTGGCGGAATTGACATTTTCTTTCGGCCTT
RM20091960609_5AG	AAGT[A/G]AGCTGCTAGCCCTGACCTCACTGCTCTCCTCCCTCCTCATAGGCTGATTGTATTACTGCCCATTGCCTTTGACTGA
RM20091960610_4AC	CGT[A/C]ATTTTGTGGGTGGTAACCTACTATTTGAACTTGTTCTATAAGAATGGTTTTGCTATATTTTTTTGTGAAGGTGTGCC
RM20091960611_13CT	CAGCACAAAGTG[C/T]TCACAGCCTCCCACTTAACTGTGTCTTGCATTAGTGACAGGTCGCCAATCTAAAGAGGATGGGATATC
RM20091960612_18AC	CTCAAGCAGCGCTTCCC[A/C]GAGATCCCAGAGGGAGTAGTGTCCCAGTGCCTTCTGCAGGTATGCTACCGTAGCCAGACAGCT
RM20091960613_34GT	ACCTCTGTGGAGGAGAGGGAATGTAGCAAAAAA[G/T]AAATGCGCTTTACTGATAAAGTACGTTAGGCTCTATAAGCAGTGTGT
RM20091960615_41CG	CTTTGGGATTTTAGTACAGGAGGAAGGCAGCTAGCTTTAA[C/G]TATCTCTTGATTTTGGATGGGAAGGGAAAAGTTGAACACA
RM20091960616_17CT	GTCCAGATTTGACTTG[C/T]ATCAAAGTGAACATGTTAAGTAGCACCCGCATCAAGCCACACCTCCAATATAATTTCCAAGTGT
RM20091960617_54CG	CATGTGTACTGAGGTCAAGAGGAGGCTATATTTATCACACCCCAAACACTGCC[C/G]CCCACCCTCCACCTACCTAAAGTGGTG
RM20091960618_47AG	GGAAGCTAGGTCACTCTGTTCTTGCTTGCTCTTTGCAAAATTAACC[A/G]AATTTCTCAGCCTTGACCATCTCTGAGGCCACAG
RM20091960619_81AG	AGGGGGTGCTCTCTCTTCTCTTAAAATAGAAAGGAAAAATGTATAGGCAGCAGCTCTGGAATGTAGAGTGACCATATACA[A/G]
RM20091960620_48AT	TGGTGCCTGTCTGCCGTGCCGCCGAGGTCTGGGGCTGCTGCTGCAGC[A/T]GGGTGCGCTGACCTGGCTGCAGCCCATCCTGCT
RM20091960621_61GT	GTGAGGATATGAAAGGGTTCTCAATATTGTACTAACAGAGCAAGCGTTGTGGCCAAGTTA[G/T]TAAACCTACTGTACAATAAT
RM20091960622_68AC	TTCGGCCTCTGTCTTGACCCAGTCTACGACGTCATTTGGAGGTCACTCATTCTCTTTCTCTTTATTT[A/C]AATTTTTATCTCT
RM20091960623_21CG	GTGGTCCACACTAAGAAAGG[C/G]GAGCGTCTGTACCGCATTTCACCTTGGGCCAAGTACGCCATCCAGGCCGAGAAACAAGTC
RM20091960625_4CG	ATC[C/G]TGTGGAGATTGGGCCCTCTCTAAGAGCTCATCCAGCTGGGTGCGTTTGGGCTCGATGGGATACTCCTCATTGACCAA
RM20091960626_46AG	AAATCACAAGGGTTTGAGCAAGTAACATAAAAAGATGGAAATGAT[A/G]TGTGCTGACTAATAGACTGAGTATTGACATGGAGA
RM20091960627_36CT	TGTTGTTGGTTTGGGTTTTCGGGGGAAACAAAATG[C/T]GTTTGTGTAGTTTACAGGTTCTTTCATAACCTTTTGATGTAGTTT
RM20091960628_27AG	GACTGTTCAGCCAGATGGGCAGCACT[A/G]CTACCCTTTCTGAAATTGGAAAATAATATTTAATCATGGTCCAATATTATTAAG
RM20091960629_60AC	GCCTTGTCTGAGACAGTCTTTCTTCTCAACATCATCATCACTACTCCGATGCCAACCAC[A/C]GAGTCAGAGAGAAACTTTTCC
RM20091960631_11AG	AAGTAAAATC[A/G]GCCGCCATCACCCCCTCAATATAACTGTTCATGGCTGCAGACTTTGGACCTGAGAGAGAATACAGCCCTC
RM20091960632_21GT	TATTTTCTTATTTTATCATG[G/T]AACACTTTCATTAGTACTCTGTCCTCGTATCTCTTACATAGCTCATGCATTACACTTTAC
RM20091960635_80CT	AAGTGAGTACAAGGGAGGGTAGAGGGGGTACACGACGATGTCATATCCAGCTCCGTTACATATCCAGCTTTCCTAAATT[C/T]A
RM20091960637_30CG	TGTGCCAACGAGAGGGGGGACGGGGTCCT[C/G]ACCAACGTAAGCTCACACACACCCTATCCTCCTGCTCCAACGTAGGTCCTA
RM20091960638_41AC	TAATGCATTAGCTCATGATTATTCAGACTAAATAACATAC[A/C]GTTTCTGTTCAAATGTCCTACATAGAGACAGATAACATAT
RM20091960641_26GT	GCCATCCTGATAAAAATACATATCC[G/T]ATGAGGGGTGGATGTGGGAGGTAATATCAGTTTTCCTGTCCTTGTTCTGTATATC
RM20091960642_27CG	AGAAGAGGCTCTACATCTCTATGGAA[C/G]CCTGGCAGAGAGGGACACAGAGGAATGGCCCTCCCATATTCCCTCCTCACCTTC
RM20091960645_22CG	CTGGAAAGGAAAAAAGGACAT[C/G]GGAGTACGTACTTTGGTTTAGTAAGTGTGAGGAGTGAACAGATAGTTTGAGCCTGTTAT
RM20091960647_77AG	TAACGCTCTGCTGTGTCGTTACATAACTCTGTCTCCCACTGAGAGCTGACCTGCAGCTATGCACCATAATCTAGCA[A/G]GTTC
RM20091960648_22AG	CTTTCTAATGCAGACAGACAG[A/G]GGGAGAGAAAGAGAGATGGGAGAGGGGAGACTATAAATAGATAACTTTTTTTGGTGGCA
RM20091960649_81AG	TTTGGACCACTTGACAGACTGCCTGGTGAGGACGGCTACATATTGAGCCATCATCTCCTCATAGGATTCATGACCCTCAG[A/G]
RM20091960650_11CT	AGCTGCTCTC[C/T]AGGGACTTTCTGGGTATTGTTCTGTTGGCCATCAGTAGGCCATATGCGTATGTAATTGTTAACACACTGT
RM20091960652_81AT	GTTCTACTGCAGAAGTAGTCAGAGCGCATTAGACAGAAACAATTGATCAAAACATACTAATTAATCTATGTGTTTTACAT[A/T]
RM20091960653_73GT	AGGGATTGAGTGTGCTAGAATGGGCCTGGTAGGGTTGGAATGGATATCTGGAATCTATAGGCCGTTTGAAAT[G/T]AACTGCCC
RM20091960654_16CT	GAATACAATACTTAA[C/T]ATGTAATTTCTATGTAGATCAATTTATCTCAATTTATATTTTTGTTATTTACCCCCTGCAGCGAC
RM20091960656_75AG	GTGGACAAGCTCTCTAGGATGGTGGGAAAATGTAGTTTTTTACACTCCGGGCCGAATCCTAACTTGAGATTCAC[A/G]CATATA
RM20091960657_63CT	ATGCATTGGGTCAACTACCCATCAGTTACAATAGTAGTACATATTCAGCCTGCATTTAACAA[C/T]TTATCAGGGGGACAGTTG
RM20091960658_35AG	TGAGGTCTAATCCAAATGGAGCTGATTTGGATTT[A/G]AGCTTTTAATAAAGATGCAGAGCATCACACCCACTTGGCAGACCTA
RM20091960659_12GT	GTTTGTTTGTT[G/T]TGATTGAGTGGGGAGGAACAGCTGCGGGCAAGGTTCTGACAGATGGGTGTGTCTTGGTGGTGACACATC
RM20091960660_3AT	TT[A/T]TTCCCCCCATAGCCCATCACTATTTACATAAATTATGCAAAGTTAAGTGGCATGATATGACAGCAAACACACTGAAAG
RM20091960661_25AG	ATCGTAAAAACAGGAGACATTTGC[A/G]CATGAGCAAGGTTCAAGCTTCTACCTTAACCTTTGAGATTAGTTTAGAATGCTGCA
RM20091960662_23GT	CCAATTGGTTGTCCGCTGCGCC[G/T]CACCTTCAACACAGAAGAGCCGGCTAAACGCAGCGGGGTGTCTTGTCACGGGAAGCCT
RM20091960663_79CT	CTCTATGCCTGACCTATTCATGAGCTGGAGAGAGAAGACCGGGACTGAGGTGACCCCTATAAGATCAAGTGTGAATCA[C/T]AA
RM20091960664_49AG	CATGTTCTTAAGCAGTTCGGACAACGGAAGGGAGCTGGTGTGTCGTGC[A/G]AAGAACCCGGCTCTCCCTAGGGCCCTGGAGAC
RM20091960665_44AG	GGCACGCTGGACCTTTTGGAAGGGTTTCGTTCCCTGACGGAAC[A/G]CTACGACCAAGGGTTCAAGGGTTATCATGGAGCGAAT
RM20091960666_14AG	GCCAATATCCAGT[A/G]GTGTAAAGTACTTCAAAGTATTTTTACTTTACTATTTATATTTTTGACAACTTTTGCTTTTACTCCA
RM20091960667_36CT	CCCAGACATTTCTGGGGGAAATGGCCCTAGCCCTC[C/T]GATCTAACAGGTCCCAGACGTGATCAATGGGATTGAGATCTGGGC
RM20091960668_81AC	ATCAGGAAGAGGGTGCAGGTGAGACTGCACGTTTAGTCCAAGGAATATGTGGTTTTACACAGGCTTGTTATTTAATACCT[A/C]
RM20091960670_11AC	CTTTTTACAT[A/C]ATGCATTTTATATTATGCATGTACAATTTTTGGACACTCTTAGAAAACAGGGTTCCTGTTTTGGTTCCAC
RM20091960671_10GT	TTTAGAGCA[G/T]GGCAGTTTTATCACCTCCCTGGCTGGCATGTAGGCCTACACTTTTCTCGGCACGTAGCATTGGGGAGGAGC
RM20091960674_37CT	TCCATTGGCCCAGATGGAGGAGGAGAGGAGGGAGCA[C/T]GTGGCCAAGATGATGAAGATGGAGATGGAAATGGAACAGGTGTT
RM20091960675_81AG	GGGTTCGGCATGAGGCAGGAGGATGTCTTCCCTGTAACGACCAGCATTGAGAGTGCCTGCAATGACAACAAGCTCAGTTC[A/G]
RM20091960677_39CT	TGACCTGGTACAGTCCCTCTCTGTTCCCTTTCCATCCC[C/T]CAGATATCAGCCGGCTTACTCGCTATGTTGGTCATCACACAG
RM20091960679_25AG	CACAGCAGCCATTTAGTACTTACA[A/G]TAGGTTACAGTCACAGGAGAAAAAGGAGAACCATGAACTGAAAACCCCAGTCCCTC
RM20091960680_28AG	GGGGCGTATCACATGAGATGTCTCACC[A/G]TCTTAAGTCCCCACAGACTTACGGTTTTAGGCATATTATGCAACGATTTTCCC
RM20091960682_48CG	CCAACACTATACCACTCCACTGCAGTTTCTACCTGCTCAGCTCTGCT[C/G]TGGTTCAAAGACAGCCTGCATAGGAGGAGAGGT
RM20091960683_54GT	TTGATGAAATCTCCGTGCCAAACACTTGGCACTGCTTGCGTAAGTAGGGTTCT[G/T]AAAAAAAATGTCCCGATTTGCATGACA
RM20091960685_64AC	CACCAGACAGGTGACAGGTGACACAGAGGTTACAGCAGTCGCAACAAAGACACATGGGGTCTG[A/C]TTCCCAATTGGCACCCT
RM20091960686_22AG	CTTTCTTGAAGACCCCAGACA[A/G]CACTCAGCCAATGAGCTACAACAGTTGAACTCCTCTAAGTCAGATTCATCAGCTGTAGA
RM20091960687_54AG	TGAACATAATACCACAGTACGTAGCTATGAAGTTAGTGCAGTAATGGCTTCAG[A/G]AAATGTGAAAAAACAATTGATGCTGGA
RM20091960688_78CG	TGTCAAACTGCCAGGGGAAGGAAGGAGACGACACAAACAGACAGTTAACAGGAGTAGGATGGTAAGGATTTAGCAAG[C/G]GTC
RM20091960689_18AG	AGGGGTTCATTACAGTT[A/G]AACGAGGAGGGGGATTCAGAGAGGAACCATTAGCGGCCAGTGAGGGGTGGGACTCTGGTTTGA
RM20091960691_74AC	ATTGATGTTTATGAATGGTTCTGCCAGACCCATCCGGGGCTGTAGCAGAGGGTTCTGCCAGACCCATCCGGGG[A/C]TGTAGCA
RM20091960692_81AT	GAGGGAGAGGCTGTGAGTTTCTCCCCCGGCCAGCGCTGCTCTGAGGTGGGTTGCGTCCACGCCTGTGGCTGCCTCTACCA[A/T]
RM20091960693_65AT	GGGGCGGTGGAGAGAGAAAAGACTGTCCACACCACCGGCAGTAGAACAACAAATATGTAGCATT[A/T]AAAAGATAAATAAATA
RM20091960694_20AG	GAGGAGAAAAGACCCCAAC[A/G]AAGACATACAATGACATAGAACAGTCACAGAGCCAGCTGTCCCCCGTGGCATGGCCCCTTC
RM20091960695_4GT	GAT[G/T]AGGTATTTTGCCAACATCTACTTAGGCATATAAAAACTATTTTGTTTTTCACAATCACGAGTATCATCTGATCCAAC
RM20091960696_28AC	ATGTCCTTTTGCACAGTCATTAAGAGG[A/C]TGTTCGTATGTTCGTGTGGGTGTGTTGTGTACAAGGTGGTGGGAGGTTTTCTG
RM20091960698_30AT	CTGCTGGAGATCCACTTCCAGAAGACCAG[A/T]AACGGTGGGGGAGAGGTGGACGCCTTCCTCTACAACCCCCTGGGGCAGCAC
RM20091960699_81AC	CATCCTGACATGACCCTCCAGCATGACCCTCCTGCAAGACAGGAATGCCAGTGTTCTACCATGGCCAGCGAAGAGCCCGG[A/C]
RM20091960700_58CT	GTATGTACAGTTTTACCGCTAGAAGTCACCACTTCATAGCACAATTGCGTATCGAGA[C/T]AATTCATCTATAGACAATCCTCC
RM20091960701_49CG	GTAATAGGCCTGCTCCTCCCGGTCCAGACGCTTAGTGGCGTGGATGTC[C/G]CCCGTGTTCTCGTCGATGGTGAAGATGGAGGT
RM20091960702_12CT	GTTCCCACGGT[C/T]ACACTCTCTGAGCCAGAGGACGACAGCCCCAACTCCTCCCCCAATGCATCCCCAACAGGTAGCTATCAC
RM20091960705_14CT	GCCCAAACATACA[C/T]GTTGACTGTATAGGAGAGCACTCTGACTCACACACTTTTCATCACATTGACTTAGTGTGGCTCAGTT
RM20091960706_56CT	GTTGACTGGCATCCCTGCCTTCACCTTGCGGCTGCTGCTCAGACACTGCTCTGAG[C/T]GCTTTCTGGGCCTGGAATGGTACAG
RM20091960707_9CG	TGATGTAC[C/G]GATGTACCGATCCTGTGCAGGTGTTGTTACACATGGTCTGCCACTGCGAGGACGATCAGCTGTAGCGCTGTC
RM20091960709_37AG	TTCTCACCACTTCGGCTTTCTAAGTGCTGACAAGGC[A/G]TGGCTAGCAGCTCACAGAGCGGCACTGCAGGGCCTGACAAATTG
RM20091960710_80AT	AGACTCATCACCACACATGTCACTGAAAAAGAGGACTACATCTCAAATGACACCCTATTCACAATATATTGCCCTATTT[A/T]T
RM20091960711_46CT	TTTGGTGGCATCCGACTTATTTCAGTGGATGCATTTTTACTGCAC[C/T]CTTGAATTGACTGGAGAACTCAGTCCGCCACTTAC
RM20091960712_56GT	AGAAGAAGTTGACATGATTGGTTTAGTCTCTAAGGTTTTAGTTCAGTTGGCTGAA[G/T]AATGAATGAACTGCTCCGAGAGATC
RM20091960713_12AG	GTAAGCACAGC[A/G]AAACCTAGTAGACCGTCACGGTGTCTTTTGGTAGTGGTTTCTTTGTAGCAATTCGTCCATAAAGGGTTG
RM20091960714_41AT	CGGCTTGTCAGCTAGCATGATGCTAATGCTACTTTGGCGC[A/T]AGGCTGTGAGGGTCTCCTTTTTTTTGAGTTAATATTTGGT
RM20091960715_66GT	GCCCTCAAACAGGTTCCTGACTGACTGCTCCCTGCTCTTTTATAGGCAGAGAACGAGAATCAAAT[G/T]ACACAATAATGTTTT
RM20091960716_62AG	TTGCCGTTCACGCTGGCCGTGACTAAATTGAAGGGATATTTTGAGGTGTTCTTTGATATTA[A/G]TTTATCTTTCTCTCAGATG
RM20091960717_30AC	CAGTGGAGGGCGCCCCGAGTCCGCCCAGG[A/C]CCTGTACCCCGGGGGTGTCGACTCCTGCTCCTACCCAAAGATCTCCATGGA
RM20091960718_58GT	CATCTTGGCATGACCCTCCAGCATGACAATGCCATACTGCTCGTTCTGTGCATGATT[G/T]CCTGCAAGACCGGAATCTCACTG
RM20091960719_13AT	AGCACTACCGCG[A/T]GCCTCGCTCCGGCACGCCATGATAACACGAGCCCCACGCCGGGCAAAGTCTAGGGCAATGAACTTCCC
RM20091960720_59GT	CACTGTGTATGTATACTGACTCTCAATTACTTACTTCGGAGTTGTTTCATTGACTATA[G/T]GCCTGCTCATCAGTATAGTAAT
RM20091960721_26AG	ATCTGTTGAGTTATGAAGCCTTTCA[A/G]AACCCATTGAGGAACTCCAGAGAGAAAACAGGTGCAGTGTCACCAGGAAGATGAC
RM20091960722_74AG	CAAATGTTGATAGCCGCGGGCTTTCAACTCCTTCAAGAGAGATGCATAACTTTCTAAAAAAATATCTTAGTGC[A/G]AGGGTAG
RM20091960723_20AT	CTACACAAAACGCTGAAAT[A/T]AAAAATAAAACATGCATTATCTGGTTTTGGGTGCTGGACTGCAGTGCCATCTGTGCCACCA
RM20091960724_77GT	GTGGGAGCACCTGCCTAAAGTTATTTGCTATATTTAATTTCAGGAGCACCTTTAGGGGTTACTTCCAGTAGCAGAT[G/T]ATCA
RM20091960725_42AG	AGTTGAGAGAACTGCGGCCGTAGGTGGGTGGCGGGCTGTGG[A/G]TGTGATGATAAACATGACTCATTTATCTGAAGCCTTTCA
RM20091960726_19CT	ACTGAGAGGAATGGTGTG[C/T]GTGCCAGGGGGAAGCGTTGCGCCTAGAGGACGCGCAGAGAAAATTAGCGGTGCACAGGTCTC
RM20091960727_28CT	AGGTACAGGATGGCAACAACAAATGCC[C/T]GAGTTACACCAGGAACGCACAAATCTCATCAGTGCTCAGACTGTCCGCAAAAG
RM20091960728_11CT	CACTGGAGAT[C/T]ATTTCCTCGACAACAATGAGGCAGGCTGTTGACAAAGTTGACCAGACATCTGTGGTGCTGTCTGAAACAA
RM20091960729_1AG	[A/G]GGCCTTGTGGTTGCCAGTGAGACTGTGAGACTGTGAGGGGGGCTGAGGAGGGAAATCCTGACAGAGATTCAGATGGGAAG
RM20091960730_31CT	ACAACTTTCTGGTTCCAGGTAGGACCATTT[C/T]ACCTAACGAGGTACCCTCAAAAAACTCTTTATGATGAAACGGTTTTTACC
RM20091960731_50GT	GCATTACACCTAGAGAGGCATCCTGTCTAGGGCCACAGCCTTGGAAATA[G/T]CACACACCTACAGAAAGAGCATGGTTTGACA
RM20091960732_80GT	GCAAAGGTCTTTGTTTGTCATTGGGTCAAAACTACAGAACAGTACAAAACAAGAGAACACACATGGTTAATGTTCAGAT[G/T]A
RM20091960733_68CT	ACGCCCCACTGGGCTGATTCTGCAGCATAATCTGCCTGTGTGATGGATGGGCCTGACACTCTGCAGT[C/T]AGGACCACCCAAA
RM20091960734_60AT	TGTATGTTGGAGCCTAGCATGAGATATCACTCCCTATGTGTCTGACAGATCAGTCAGAT[A/T]ATCAGCTTATTACTAGATGAC
RM20091960735_37CT	TTCCTGACATGACCCTCCAGCATGACAATACCACCA[C/T]GCACAGAACGAGCAGTATGACTGCAAGACAGGAATGTCAGTGTT
RM20091960736_48GT	CTGGTTTCACCTTTCCAGAGGACAAATCAACAAATGCGGAATCACCA[G/T]AAACTCCACTCCAAAGAGCAAGAAGAAAATACT
RM20091960737_21AG	TTATAATAGACTGAATAGAT[A/G]TGCGAGAGAGAGTCATCTTTTACTAGACTAATTGCAAGACCTTTTAAATCATTTGATTAA
RM20091960738_72CT	TTCATTGCCATGACGATGAAAGTGTCTTCAGCGGGGGAGTTAAAGGTAAGTTATTGCACAGTTCTTCAACA[C/T]GTTCATACA
RM20091960739_39AG	CATCCGAAGGGGTGCTGATGAGTATTTCTGTCTGTAAT[A/G]AAGCCCTTTTGTGGGGATAAACAAATTCTGGCCCACCCATGG
RM20091960740_50AG	CATCCTAACATGACCCTCCAGCATGACAATGCCACCAGCCATACTGCTC[A/G]TCGTTATGTGCGTGATTTCCTGCAAGACATG
RM20091960741_16GT	ATAGCTCACGCTCCC[G/T]TCCGGCTCCCAGATCTTGACTTCTGTTGCTTCGGGTGAAAACAGAAAAAATATCTTTCCATCCCT
RM20091960742_12AG	GGTGAGGTGCC[A/G]GAGGTCCCTCCGCCCCCTCCGGACATCGAGGGGTCCCTGGCGTACACAGTACATGCTGTTCTGGACTCT
RM20091960743_49AC	AGAATTAGATGATCACCTGGCCCATCATGAGTCCTGGAGCCTGCAGCA[A/C]GTACACAGTGTTCACATCAACAGCACAGGGCT
RM20091960744_46GT	AAAATAATCAACTGTCATCAACATTTGGAGTATAGTTGGGGAACG[G/T]GTTTAGTGAACGCGGTTGTTCTAAAGCTTTACCTC
RM20091960746_6GT	CTCAG[G/T]GACATCTTCATAAGATGCAACGATATTTTATCTAAATTGGAAGGAATAATAAATAGGCCTGACTGATCATCTTGA
RM20091960747_74AG	TGGAGTATTAACTTATAAAACAGTCCCTCTGGGAGCTTTGGGGTTCATATAGATATTGTGTTAACAAATACAT[A/G]CTCCATA
RM20091960748_60CT	TGAAATATGTTTTCTCTCTTTGTTTACTATGGTGCTATCCTCAGGTAATAGTTTGCTTT[C/T]GCCAAAAAGCCTTTTTGAAAT
RM20091960749_52CT	TGGATCAAACCTGGAGAAATTGGGTCAACCACAAATAATGAGAAGGAGCGG[C/T]GGAACAGAACCTCCAGGCAGAGGAGAGGG
RM20091960751_40GT	GATTTTGATTGTCAGTTGAACGGTGTTTCATCTGTCTCA[G/T]CACTGCAAGTCCCCAACGGGCTAGACAAAGGTCTAGTCATT
RM20091960752_78CT	GAAGTCGTTGCTGTGGTTTAGCTCTAAGGGAAGGCTGAAGTAGAATGGAGAACCATTCTCCGCTGAGTCTCGGTCTA[C/T]GGC
RM20091960753_44GT	GCCTTGTCTGAGATGGTCTCTCTTCAACCACAAAGTTTAGAGA[G/T]AAACTTTTCTACCCTTAAAAGGATAAAAACCTTCACA
RM20091960754_2AG	C[A/G]CTTATGTCATTTCAGATCATTTGAGATTGCTCCTGCTAACCAAAAGTAGAGCTGTGATTGCTTCATGCTCCGTCTGATA
RM20091960755_78GT	TTTGAAGACACCCTTCTCCAAGTGGACTCCGGAGCAGGTCTGTTGCTGGCTAGAGGAGAGTGGGCTGGACCAGTATG[G/T]GAT
RM20091960756_25AT	CAGTGCCTCAGCGACCTGGAGAGC[A/T]GTAAGAAGACCAGACAGGGATGAAACGACATGATTTCGAAAATCTATCCACAGAAC
RM20091960757_25AG	CAGATTGGTGGTGAGGAGATTAAA[A/G]TCGAAGCACATCCTCACAAGACGGAGGTAGTCTAATTGTGGTGGACCATTGTTGAG
RM20091960758_45AG	GAAGAGAAAGGTTAAAAGGCATTGGTTCTAGAAAGATGGAGGGG[A/G]ATGTGGGATGGCTGCTCTCTTGAAAAACAGACTCTG
RM20091960759_3GT	GT[G/T]TTGGTGTAGGAAAGGATATTACATGCACTGTTATTTGGAGATACACAGTTAATAGGATTTTGCCTCTTACCTGGAAGG
RM20091960760_43GT	TAGCATGTGTGTTAATGTTATATTGAAGAAGGTTATAGGAAT[G/T]ATGAAAATTATGTATTTTATCATCAGGTTAGCTCAGAA
RM20091960761_71GT	TTTGGGAGAGAATGTCTCCAAAGACAAGGACGCCAAAGATGGCGTCATACACCACTCAAATCAAGAGGAG[G/T]CTGTTGAAGT
RM20091960762_2AC	T[A/C]ATTTCCTGAAGTTGATGATGTAACATACATACTGTGGTCACCAACTAAGAGCAGAACCCTACAAAAAGTACAGACCAAG
RM20091960763_33CT	CCCCTCAACTAACCGAAGGTGCAAAAATCGAA[C/T]CATTGACTAGCAATGGTTCCTTGAGGATCTACAGGGGTTCTCCTACTC
RM20091960764_34CG	GATGGCTGAAGGCTAACACAGGAGACTGGGGAG[C/G]CATCTCGGATTCCCAGACCCAGACTGGTGCAGGCAAGGACCCAGGGG
RM20091960766_28GT	GGGCATGAGCTCACACAGGTGGTCGAT[G/T]GGAGGCCGTAAGGATGGCAGATCCTCCAGGATGGCCAGGATGTTCCTGTTGTC
RM20091960767_62GT	TTTACGACAGCACTGAAAGAATCACTCCTTTCCCCATGTATTCACTATATCTCTGCTAAAT[G/T]AACCATGTTTATTCAACAA
RM20091960768_72AC	AAGAACTGGCCTCATCCCAAGCAATTATGGTGAGTAAACAAACCATTCACTGTATGTGATATGTCGTATGG[A/C]AAGTTTCAT
RM20091960771_43GT	GAAAGAGACCGCAGCAGGCCGGTTACCCCGTTAACACACACA[G/T]ACACACACAGCAGTACTTGGCCCTAGCTTCATTCACTT
RM20091960773_14AC	TAAATTGTTTATT[A/C]GCAAGCGAGCTTAGTAACCTACAGTGCCTTCAGAAAGTATTAAAAAAGTATTCAAAGTATTCACATC
RM20091960774_8CT	GAGGAAA[C/T]GAATGTCTGGCTGTGTCCGGAATAGAACCCTCCTGGGCCCCACACTGGTAGGCTATAGAGAAAGAGAGAAATT
RM20091960775_5AC	AGAC[A/C]AGGCATAGTGGGACATTGTGTTGCTGTGAGATACATTTGGTGTCTTTTTCAATGAAAACAATATGAGGGTGAACAC
RM20091960776_10AG	ACGCTAGTC[A/G]TGGTTACAAAGGACAAAAAACATCTTCCATCCTAGGCCCCATTGCAGTGGTGTTCAACCGATGGAAAACTT
RM20091960777_31AC	CCTTAGATCCATCAGTGAATATATTAAAGA[A/C]CGCATAGTACTGAGATCTCAAATGTTCACTTACAATATTTACTGGATCTA
RM20091960778_80CG	CCAGGCCACATCACTCAGAATGACTGAACTGTCCCCCTCTTTTTAGGACCTGGCCTTCTCCGTCTCCATGACTACCCTA[C/G]C
RM20091960779_56CT	CAGTATGTACCAGAGGTCACTGTCTGTGTAGTCAGGGTGAATGGACCTGTTACAT[C/T]AGGTATAGGCCCAAATAGCACCCTA
RM20091960780_66AG	AAACGCTCCTAGAATTGGGTGATACGGATATGTAGCTTTGTGGTCGTGACTGAAGAGGAGGAGTG[A/G]ATGGTTTAATGATCG
RM20091960781_1CT	[C/T]GGAGTCTAACGATGTGATGACACATAGCAACACCCTGCCATGTGCGACAGTAGCCAAGAACACATACACATATCTCCTCC
RM20091960782_10AG	ATGATGAGG[A/G]TGTGTGTGTGAGAGAGCGCACGTGGGAATACTGGAGTTGGGTAAAGGGGCGTGGTTCCTCTTGGTGTGGCG
RM20091960783_52GT	GAGTGATCAGGTCTCCCTTGGTCATGGCGATGCGGATCCAGCGGTCCTCTC[G/T]GTCCCTCACATCAAAGTAGGCCCTGCCAT
RM20091960784_70AC	GCAGCAGAGAGCCAGGCTCAGTGAACAGGCTCACAACACACTAGGTACAAGGTGTCCCTAACCACAGAT[A/C]TAGGATCAGAT
RM20091960786_61AG	TGAGAGTGCTTTTGTGCTAAGCACAATGTACACCCTACCCAAAGGAGAAGTTGCTGTTTG[A/G]AAAACATTGAATAATTGACC
RM20091960787_15CT	GTGCTGCAGCAGGG[C/T]GCCGCGGGTACATGCCACATTTCACTCACCCCTGCTTGTGCGCAACCAGTGCCCCCCACCAACCCA
RM20091960789_72GT	TTCCATCTGTTAATGTTACCAGTGTTTCCTCTGGAAAAAATTGTAGCAGTGGGAGGAAAAGGTCGGGCCAA[G/T]AATGTTTAT
RM20091960790_31CT	CTCCGACTCCGAAGTAAGAGTTATTTTGTA[C/T]CTCCATCCAATCACAATCACTCTATTGAGACATATTGCAGACTCGTTGAA
RM20091960791_42CT	GGCCAGTCTCCGGGGGTGTACCTGCGCGAGGACCCCATCTG[C/T]GGGTCACAGGTACGGAGCTCGTTGGCTAGTGGGAGTGTG
RM20091960793_11GT	TGGAATTGGA[G/T]GTGAGGGCCGAGGGCTGAGGGCAAAAGTCATGGAGCCTGGGGAAAGAAAGTGTGTCAAGCTCTCCTCCTA
RM20091960794_31CT	CTGCTGGGAGAAGTTCTGGTGCATCTGAGC[C/T]GCCTCGTGGGCATCTATCGTGTTCCCACACGCCTTGTTTAGATCTACAGG
RM20091960795_13AC	ACACAACAAGAC[A/C]AGGTCAATTGATTCATAAAATAACTATCTGCAAATCATATTCTAACAGTTAGGGCTCGGAAAAGGATA
RM20091960796_46AG	GGGTACCACATGAGGGAGGAGTGCGCCTTCCCTGTAATGCACAGC[A/G]TTGAGATTGCCTTCAATGACAACAAGCTCAGTTTG
RM20091960797_1AT	[A/T]AATGACAATGAGTATTTCGCTAACACAGGGTTTTAAAGTGTCGATAATGCGTGTGTTTAGAGAGCGCGAGTTGACAAAAT
RM20091960798_57AG	TACGGGTCAAGGTTTGTTGGCCAATCTTACAGTGGCAATGATTTATAGAACACATC[A/G]CTATTGAAGTCCCCTGTCAGTCAT
RM20091960799_33AG	GACTTCGATCATCAGCTAAACGGTGTTTCCTC[A/G]GTCACATTGACGCTTTTGGGTTAAGGGAACTAGTGTCAAGAAGCAGTT
RM20091960801_63GT	GTGGGGTCACTACCAGGGTCACCATTGTCCAGAGTCCCTAGACATACATTCATGTACAGAAT[G/T]TATACATTTACAAATATT
RM20091960802_27AC	CACGTTCATCAAATACAATTCAATTC[A/C]ATTTACAGATATATTGGCTTAAACTACAGTTTACTGTAAATAAGAATGGACTAC
RM20091960803_29CT	ATAAAGGGTGGCCACATCAGCCAACACT[C/T]GCTCGCTTCCCTGACTGGCAGGCTGGCTTCTACGACTTTTAGTTTTGTTGGT
RM20091960804_31AG	TGCCTCAGCCCCTTCCTGGGACTGGCACTT[A/G]TCCACAGCCTGAGAGGCCAGCAGGTACACCCCCGACTCACACCACTGGTT
RM20091960805_49CG	CATCAGCACAGGTGGCGGAATTGGTGGCATTGACAGAAGCATTGCAAA[C/G]AGGCTGAAGGAAAAACAGCTAAAATCTACACA
RM20091960806_70CT	AATAGATCAGTTACAGGTACAAGCTTTGGATAGCAACATTTAATATGTGTAACACACATCCAGTATATA[C/T]GTTTTAGATTC
RM20091960807_61CT	CCACAGTAAATAGCTGATGGTCCAGCTGGTGAAATTAAAGAGAGCGATAGATATATTTAC[C/T]CAGGAGCACAACTCTGGCCT
RM20091960808_78CT	ACCTTGAGCTCTCTGCATGCTCAGAGGAGTTTGAGGATGACACAGACCCCTCCGTCACCTCTGAAATGTCTCCTGAG[C/T]GCC
RM20091960809_62CT	GCGCCTAGTTGCGCGTTACGAGAATTTCAAGAACTCATAGGTAGGTCAATGGGTGTGTAAA[C/T]GAAACTGGGAAATCACCTC
RM20091960810_80AT	CAAGGGCTCCTTGGGGACCCGCGGGTCCCTACACAAACACAACAGGATGTTAGTAATCACATGTAATATCCATCATCCA[A/T]A
RM20091960812_36AG	CATTGCTGCATAAAACCAATAAAATCATAAGGGCA[A/G]GTCACAGGAGGGGGACGCTTGCGTCGCTCTTTCCCCCTCCACCTC
RM20091960813_72AG	CATGTGATGGATGTGGCGCTGCCATGCCGTTGAGGAAGAGCAGGAAGACTGCGGTAAACTTGCACCAGAAG[A/G]TAAGGGTGA
RM20091960814_43AG	CAATACAGTAGATCAAGTGTTGTCAGTGTTTCCATTTACATG[A/G]CCATGCCTCCTCTTCTAAGTGTCCATGTTTATTGTCTG
RM20091960815_9AG	TGGATCCC[A/G]CCACTGCCACCAAAAATACATAATTTATCCAAGATCACTTTGTATGTAGATGGCCAAAGTTTAGTGGAGCAG
RM20091960816_25AG	GCCCAGGAAGGCCTCAAAGGGGAA[A/G]TGGAGGCGCGGGTCGGACAGCGCCGGAATAAAGAAGTGAAAGATCTGCTCCGTGAA
RM20091960817_69AG	AGTTTCCAATGAGTAGGCCTACACTAATTTCTCTCCGTCTTTTTTTCAACTCTGAGTGTTTGCACCAC[A/G]ACGTTGACATTT
RM20091960818_8AC	ATCAATT[A/C]ATTCTAGATGCTACAAATACAACAAATATAACTAACTGTACAAGTAAATAAACCCACAGTGACAACAGAACAC
RM20091960819_16CT	TGATGTTCTCATGTA[C/T]CGATCCTGTGCAGGTGTTGTTACACATGGTCTGCCACTGAGAGGATGATCAGCTGTCTGCCCTGT
RM20091960820_2GT	A[G/T]TGGAAAAAGAACAGTTACATTACAAGTCAAGGATATGTTTATTGGGGTTAAATAATTGGCTAAACAAAAAGGTTGAGGC
RM20091960821_70AC	TGTTTTTTACTCTGTTGGATAGGCTACTTGAGTAATTTCGCTGCACGACAGAAAAATGGACACCCAAAC[A/C]TGTTCCTGCAG
RM20091960822_42CT	CAGATGAAGTTTCTGGTGGAGCAGATGAGGAGGCCAGACTA[C/T]ATGGACGCCCTGCAGAATTTCACCTCCCCCCTCAACCCT
RM20091960823_74CG	ATACACTGAATTGGTGTTTGTGTAATGGAAGGTACCAGGAAGAGATGGCTCGTGTTGAGAAGAACCTCGTTTT[C/G]GGGGCCA
RM20091960824_55AG	TGATGTTTGGATGTTCCGATCCTGTTGTTCAATGTGATCTGCCACTGCGAGGAC[A/G]ATCAGCTGTCCGCCGTGTCTCCCTGT
RM20091960825_76AG	GAAACAATGACAGCATTTGTGAATCTTAAATATCCAAAATATAATTTGACAAGGGGAGTTCTTCACTTGCACAAG[A/G]TGCCA
RM20091960826_41CG	AGCTTCTGTAGTGAGGTAGAGGGATTAGATGCTGGACAGA[C/G]TTGGTTAACTATAATCCTGGAGATGGAGTTGGAGAATGCG
RM20091960827_65AG	GACATGATCATTAGACATTTGCCCTTAAGTAGTGATTATGAAATATAATTACAGTCAAATTAGC[A/G]TTTCATAAGAGCACAC
RM20091960828_43CT	TGAGTCCATTGCACCTCTCAGTGTAGAACTGTCTGTCATAGC[C/T]ATCACAAAACTCCCAGTCCTTCTCTTGGTACTCCAGTC
RM20091960829_4AG	CCC[A/G]GTCTTGCTGACGGTGTACATCTGTCCAAACAGTGGCGATGTCTTATAGATGTGCTTCTCGGCTTCATCACACAGTCT
RM20091960830_16AC	GAGGCAGAAGTAGTT[A/C]TCCACCCGTTTGCTGTCGTCGCCCAGGTAGACCTTAGCCTGGTCCAGGAACTCCTGAGTCACGTC
RM20091960831_23AC	GCTGGTCTTGGAGCTGTCTACC[A/C]CCTGCCCTGGAAGCCTCCTACTAAGCTTGGGCGTCAGGGGGCTGGACTCCGCGTCCTT
RM20091960832_45AC	ACAACAAGATTGTCAGGAGAGACAATGAAGTTACAGTACAGGCC[A/C]ACTAGAATAGATTACTCTCGTGGCAATATCGTCATC
RM20091960833_51CT	TGAAATATGCTACCTTTTGTTTACTACTGTGCTGTGATCAAATAATAGCT[C/T]CTTATGCTTTCACCGAAAAGCATTTAACCT
RM20091960834_26AT	AGTAACATGAGTTGGGATTATGGTT[A/T]ATTGTTTAGCTAACTATCTACCTACCTACCAGGCTACACAAAAGACTCCGCTACG
RM20091960835_74AC	CTAATTAGATCAACAGGAAATGAGAATTTATTGGAATGTGGGCCGTTGGAAAATGTCGTAATGAATATTTACT[A/C]AACTGTT
RM20091960836_62GT	TAAAACAACACCATCTTGTCAAACTGACAAACCTTTTTCCTAGTTTATCTTCCATGTAGGA[G/T]AATCCTTATCAATTGAGCA
RM20091960838_45AC	GGGTACCACATAAGGGAGGAGCATGTCTTCCCTGTAACGCATAG[A/C]GTTGAGATTGCCTGCAATTTCAACAAGCTCAGTCCG
RM20091960839_33AC	AACGGTAAAGCCAATGGGAGCGTCCTTAACCT[A/C]AATCAGCCGGGCTACAATCACCACAACCTCCTCAACCTCCCTACCCTG
RM20091960840_50AT	GTTTAGAAGCTGATCCGGGGCACCGGAGGGTGGCAGCCAATTGCCAAAA[A/T]GACTGTGTAATCTTGCCTAATGGGAGGGCCA
RM20091960842_77GT	ATCCTGCTGAGACTGATTGTGACCAAATGGCTGAAAGATAAAAATAAGTCGACAAGTTAACTTATCTTTAAAAAAC[G/T]TATT
RM20091960843_14CT	TGGCGGAAATGTC[C/T]TGTTTTTAGAGCCCTCCGGAGACACAACATTAACTAGCCCCATTAATCACTTCTTCCTCTTCATCAG
RM20091960844_23AG	GAGCACAAAATAGCATTAAAAC[A/G]AGAACAGTCAACGCTAACAAACTGGCTCTGCTTTCTAGTATCAGCATTGGTACTTACT
RM20091960846_43CT	CTGCTCAGAGGGGCTGTGGAGCTGTTGAGATCTGGGCCTAAT[C/T]GTGACAGAGACAACTATCAGTGACTATCGGATCACAGC
RM20091960847_46CG	TGATGTTCAGATGTAACACACCTGCACAGGATCGGTACATGTGGT[C/G]TGCCACTGCAAGGACGATCAGCTGTCTGTCCTGTC
RM20091960849_15CT	TACAGCCCCCGTGG[C/T]ATTTTGTAGCCCTGCCCTGTAATTACTTGCAGAGAAGATGGCAAGGGAGAGGGGGACGGGGGACGG
RM20091960852_21CT	CTGAAGAGAGTGATCATTAA[C/T]GCAGCCCACTTCCTAGTGATGAAGAACAAGGATGTGTATCGCTTCTACCAGACAGAACCC
RM20091960853_53GT	GTCACATATAGGTACTACCACCAGGGGGCGATCATACATAGTAGAGTACAGT[G/T]TGTATATATAATACAGTACAGTATACAT
RM20091960854_29AG	AACTTATCTGTTACAGTCATCTCTAATG[A/G]GGAGGTATGTTAACCTGATTAGACAAGATCTGTCCTCAGCTCTAATTAACCA
RM20091960855_15CT	GAGTGTGAGAGCAA[C/T]GTGCTGCAGGACGGATCCTTGGTAGACCTGTGTGGAGCCACCCTGCTGTGGCGCACAGCTGACGGC
RM20091960856_57CG	ATATTTCTACAACTTCAGTCAAGTATTTTCCCTCCTGTAAATGCGTGTGTGGCTGA[C/G]CAAGATAAGAAGATAATGTAAAGG
RM20091960858_64AG	CAGCTGCGTGATCGTGCCTTAGGCAGATATGGCCAGGGCAATACATTGCAATATCCGTACTGT[A/G]AGATACCTAAGACAGCG
RM20091960859_63CG	ACAAAGTTTTTTGTCAGATGAATCATAGGGTCGAAACTACAGAACAGTATAAAACAAGCTCA[C/G]ATGGTTAATGCTCTGGAA
RM20091960861_21CT	ATAGAGACGGCTCTGGATTG[C/T]CTAAAGAGTGCCAACACGGAGCCGTACTACAGACGACAGGCCTGGGAGGTCATCAAGTGT
RM20091960862_23AT	TGAAATATGTTCTCTCTCTTTT[A/T]TACGGAGGTGCCATTCTGAGATAATAGCATCGTTTGCTTTCGCCGAAAAGCCTTTTTG
RM20091960864_72AG	AGGCAGAAGTACCATCACACACACACATTCATGTAACAAAATAGGTTCCATCCTTGTCTCTCACTAGGCTC[A/G]AACCTGTAC
RM20091960865_49CT	CTGGGGCAAGGCCAGGAGGGAGTCGTAGGCTTTACACTGCATGTGACC[C/T]GTGCTCTGGATCACACAGTTCATCCATAACCC
RM20091960867_15CT	CCCCAAGATGCCTT[C/T]CTGCTTGGGGGCGAAGATTTAGGAAAGATACCATACACAATGGTGGGGGACGCTGCCTTCCCACTA
RM20091960868_20CT	GGCATAGTGAGACGTCCAG[C/T]GTGAACGTGGAGCCCCCGACACCTGGCCGCAGTCTGAGTGCTGAGGGCAACGACCTCCAGG
RM20091960869_51AC	CTCACATACACGCATCCCATGATTTTATGTGGTTTTATGTTTTTGATGTT[A/C]ATTTCCATTTCAAAAGGGTGATTTTTCCAC
RM20091960870_12AG	GACAACGATGA[A/G]GTGCAGCGCTCTGTGCAGCTGCTGAAGAAGAAGTGTAGCAGACTGACGGCTGAGCTGCAGGACACCAAG
RM20091960871_44CT	CATCCTGACATTACCCTCAAGCATGGCAATGCCATCAGCCATT[C/T]TGCTTGTTCTGTGCGTGATTTCCTGCAAGACAGGAAT
RM20091960872_37CT	ACAAGCCATGACAAAACACAATGAGTGGCATTTCTG[C/T]TTTGTCCATGATATTTACAAAGAGCCAGATAAACACTGTGGCAT
RM20091960873_2GT	G[G/T]TGTACATCATCAGGTGTTGAGTGGCAGGGGGCTGGGATATAGTAGGGGGCAGAAACAGTTTTGGGATAGGTAGTCTCAG
RM20091960874_62AG	AAAACATGCAGACACCTGCATCACTGTCTTTTGTGAATTCTAAGTGTTATACTTAGCCACT[A/G]AAAAGGATGGGGGTAAGAA
RM20091960875_41AG	TCACTACTAACTTTTTTCCTCACGGTCCCCTTATTGTCCC[A/G]GAGTGTAATTTCAACTGTCCCAAACTGAACTTGAACCATC
RM20091960876_52AG	TGATAACCGTTCTAATGCTCAGCAGTGAGAAAACTAAAGCATCTCTCTGGT[A/G]AAATGTTGAACTTGGTTAGAAGCCAAAAT
RM20091960877_35AG	GGGTACCACACACAGCATTGAGATTGCCTGCAAT[A/G]ACAACAAGATGATGCTGTGACACACCGCCCCAGACCATGACGGACC
RM20091960878_29AG	GACGAGGTTCACTCACCCTCAGCCTCTC[A/G]TTCTAGATCCTTTATTTACCCCGATTAACCTAGCTGTTGTTAGCGCTGACCA
RM20091960879_68CT	AGACGGACAGAGACAGAGGGAGGTCACCTTTCACCTTGACCCCAACAAGATCACTTTATTTCCACTT[C/T]AACCCTGCATTCC
RM20091960880_48CT	TAGGTACACCATGAATGTTAACCACAACACAATCTAGTTATAACCTC[C/T]AACTTATTTTGTTTTAACCCGCAGCTTCCATAT
RM20091960881_71GT	GTGCTAAAGGCTAGTGAATAAAACTGTCACGCTCTCGCTTTTGGCCAGCAGGGTTGACTGCAGCGACACA[G/T]CTTGTCTATC
RM20091960882_80AC	AAGGTAGGTGACGTGCAAGCTCAAACGACCTGGCTTCAAATACTATTTCAAATATCTTAATTACTTTCACATGCATTTC[A/C]A
RM20091960883_80GT	GAGGAAGGACAAACCTCAGAGCAAGCGGACACCTGGGAGCCCATAGGTCAATGGAGGCACTCCCCTGTGGTCTGCTCGC[G/T]C
RM20091960884_30AT	CATCCTGACATGGCCCTCCACAGCATGAC[A/T]ATACCACCAGCCATACTGCTCGTTCTGTGCATGATTTCCTACAAGACAGGA
RM20091960885_34AG	TCTTTTACTCTCTATGGTTGTCTGTAGGAGCGT[A/G]GAGATAAGGGATCCACCACTTGACTGAGAGGAGGACTGAGGGGAGGA
RM20091960886_39AG	GGGTTCCACATGAGGGAGGAGAATGTCTTTCCTGTAAC[A/G]CACAGCGTTGAGATGTTCTGCAATGACAACAAGCTCAGTCCG
RM20091960887_62AG	AGCTGGTTGGCTTCAAACATGCATTACCCATGATGCCTCTCCTGTCTGCTCAGCATTCACT[A/G]AGAAAGAACCTATCACAGA
RM20091960888_50AG	CGCACTGCACTTCCTGACAAACAGCCTATAGGGACAGAGGGGAGAAAGG[A/G]TGCGTTCCAGTGTGTAATAGATAAGTTGTCT
RM20091960889_58CT	TTTAGAAGAAGTGTCAACCTCTAGCAGGCTCAACTGAAGTGTTTCTCACTCTCTCAC[C/T]TTCCTTCACTGTTTAGGCCAGAG
RM20091960890_16GT	CTTCCCACTGGGTCT[G/T]TCAGGGCACAGGCAGACTCCCATGTGGCTGGATTGGCAGATGGCTAGGCTAGACGGACATTATAG
RM20091960891_59AC	AGATTTATTTCAGTTCCAAGCTTCAATGTTTTCACTATCTTCAGTTTCAGGCATGTTT[A/C]AAAAAAAAAGTGTAGATGTGGT
RM20091960892_2AC	A[A/C]CAGCAGCAGTCTTGTGCTCACGCTGGGAAAAGTGGATTCCTTTCGGCCATACATGACAGAATCTCACCAATAAGACAAA
RM20091960894_71AC	AGCCATATTTCAACCATGCCTTTGACGAGCTTCTTTTGTTGGCACTCCAATATGTCCCATAAACATCACA[A/C]ATTGTCCTTT
RM20091960895_46AG	AGAAGGGATGTGATGGAGAAAGGGTGACAGTGGTGGGCAAACTAC[A/G]ACCCGCAGGCCCTTTCTATCGGGCCCACGGGAGGT
RM20091960896_78GT	GGGGGAGGTTTTTGCCTACTTCTGACAGAGTAGCTTCCAACTCTAACTCAGGACAGAGAGAATGGAGGGGAGTGTGG[G/T]GGG
RM20091960897_58AG	CAGATGGGCTAGCGCTGGTGTGTGTGCGTGCATGCGCCTGCGTGTATGTGTGAGCCA[A/G]GGGATTTGGGCTTCTGTAGACAG
RM20091960898_27CT	ACAGAAAAGGCAACATACTATTTCCA[C/T]CATATACTATACTGTATCTGCTACATGACAGAATGTTGGTGTGCCCCAGCATGC
RM20091960901_71CG	CAGGGGAGCAGGCCTCTCTCCAGCCTGATTAATAATGAATGAAGCAGATCATCTATTGATCTCCTCTGGT[C/G]TGTGTGAGTG
RM20091960902_1CT	[C/T]GCCACCATCTTCTCTGCCTCCTGCACACAGAGGAAGACAGACAGGTGGGGTTCATAAAACACTACATCACTTATCTGGGC
RM20091960903_73AC	TGTCTGAGACCAGACAACTGAAGAAACAAGAACATTTCTGTCTGTAATAAATCCCTTTCATGGGGAAAAACT[A/C]ATTCTGAT
RM20091960904_77CG	GACATGGTCCCACTGGACTACCAGAGCAGTGCCTGGATGAGAGGAAGGGAGAGAGGGAGACTGTCAGAACCTTAGA[C/G]AACC
RM20091960905_21AG	TGAGGGAAGAAGACAATGTC[A/G]GGGGGTCCTAGAGTTTAATATGCAGTATTTGGAACGGATTGATACAGATTCCCTAGTAAG
RM20091960906_37AG	CATCCTGACCCTCAGCATGACAAGGCCACCAGCCAT[A/G]CTGTTAATTCTGTGCATGATTTCCTGCAAGACAGGAATGTCAGT
RM20091960907_23AC	GTCCAGAGGAAAATGGCCCTGA[A/C]AATCTTGTGGAATTACCTACAGGATATCCCACTGTATTTTGGGGCCGATTCCTGCAGG
RM20091960908_53AG	ATGCCTTCAGTCAGCATGTGTGCATTCTTTGCAGGGCTGAAATCCCTGTGGC[A/G]TGTGGTTTTGGTGCAGTATCCAAAACTC
RM20091960909_69AC	GCTGAGGTCCTTGCTGCCTGAATGGGAGGCCTTCTTAGGCCGGGGCCGATGGTCCGGAGTCAGCTTGG[A/C]CACGTGGTCCTT
RM20091960910_13AT	TTAACTAATTAA[A/T]CGACAAAGAATATGATCTACATGATCAGTCTGTGTGTAAAATAAAAAGTGGTTAATGTGAACCTAACT
RM20091960911_23AG	ACTACATCCTCGATGCCAAGCC[A/G]AAAGAGATTTCTGAAGCCCAGCGGCTAAACTATGAACAGGTAAGGACTGTTGCCTAAA
RM20091960912_32AG	ACCGTTTGTTTGTGTGTGTGTGCACACATGC[A/G]CATGGTGCTTCAACTTTTAACAATCCCTCAGACATGGTTTTCAATAGGC
RM20091960913_22CG	AGCTCCTTGTGCTTTAGCTTA[C/G]GAGCTAAACTAAATGTCACCATGATTGCACTATGATGGATCACTGGTGGAGCACAGCCA
RM20091960916_57AG	ACACTGCGTGCGCTTCATCAATCAGAACTGTTCAGCTGAGAGGGCGAGAGACCGCC[A/G]CAATACGAGAGCTCCAAACCAAAT
RM20091960917_42AT	CTGCTGATGAAGACTGCAGAGGAGCCATTGGCCGAGGTCAC[A/T]GTGGGCATGTCTGTCCTTGCCGAGCGCTGCAAAAAGGCC
RM20091960918_54CG	GAGGACAGATAGTTTTACATGACACTGATTGATCACCAAGAGCCCAAATCAAT[C/G]TGATCCAGTTAATAATATTTTCTTTAC
RM20091960919_9CT	CACACAGA[C/T]AACACAGACAGAGCAGAGGTCAGGGCAAGACAGGAGGAAAGAGAAAATCTCCATCTTGGGGTAAAACAGACT
RM20091960920_68CT	CCAGAAAGTATTTAATAAAATAGCATTCATATTTTAGTGGCTCATAGTATTGCATAACTATTGTACA[C/T]AGTTACACATAGA
RM20091960921_76AG	GATCAAGGACTCCTATTTGTTTATGTACCTTAAGGGGGAATGTTTTACAGAAAACTAGCTGGATTCCTTCGGTGT[A/G]ATAAA
RM20091960922_39AC	TTCAAAGACACTGGTACAAAATCAAGTCCAACTTTATT[A/C]TTTCTAAGAATAATGATAAGCACATTTTTCATGTTGGAAGTG
RM20091960923_21AC	TTTTAATAATACCAGTAATC[A/C]ACACTGATATGACAGGAAGAACATTCTGATTAAACAGAGACACAGTCAATGGTTAGAAGG
RM20091960924_15AG	GTAAGCACAGCAAA[A/G]CTCAGTAGACAGAGCAGGGAGGAGCCCTCACATCTCCTTTCAATGTTTCTACTCTGAAACACCTCA
RM20091960925_18CT	CCCTAAAACGGTACACG[C/T]TTTAACTGTGGCCCCGGGACAAGCACACCAGACTTGTCAACTAATCCTCAAGCCCTTGATAAG
RM20091960926_63CT	TACGTATACCCGTAGTATTTATTCTGTGTATGCACACTAGGTAAGACCTGAGTATTTTGGTT[C/T]GCGTGCCAGGTGGTGCTA
RM20091960927_31CT	ATGAACTGATGCTTTTCCAAATTAGGTTTA[C/T]GTATAGTAATAAATAAGCATTGCATGAAATTTCACTGAATGGCGCCCAGA
RM20091960928_55CT	AGCACGGATGGGCCACTGTCCCTGTGTGACCCTGAGTCTGAGAGAGAGAGGGAT[C/T]GAGTGAGTGTGAGAAATTGTTACAGT
RM20091960929_75AG	TTCTGCGACCAGATGGGCCTCCACATCGACTTCTCCACGGCCGGGACGCTCCATGTGGGTATCTCCAACTCCCA[A/G]CATGCA
RM20091960931_76AG	GGGAACCACATGGGAAGGAGGATATCTTCCCTGTAACGCACAGCGTTGAGGTTGCCTGCAATGACAACAAGCTCA[A/G]GCCGA
RM20091960932_55CT	AGGTACAGGATGGCAACAACAACATCCCGAGTTACACCAGAAACGCACACTCTC[C/T]ATCAGTGCTCAGACTGTCCGCAAATA
RM20091960933_35CG	GAGGAGGGTCGTTAGTGATTCACCTGGGCTCAGG[C/G]TATTTAAACTGCTTCACTAATCACTCTTGTCGCTCTCTCTGTTCCT
RM20091960934_38AT	GAGGAAGAGAGGGAGTGACCGTGTAGACTAACACACT[A/T]ACAAAGCTACCATTTTACACAAGTAGTACTTCACTACAAGACT
RM20091960935_32CT	CATCCTTACATGACCCTCCAGCATGACAATG[C/T]CACCAGCCATATAGCTCATTCTGGATCGGAGGGTGAGGGCTAGGGCCAT
RM20091960936_14GT	TTGTTGCCTAATA[G/T]AAATTGTGTTTCTATTTTGGCTTTGACATCTCTCCCCACAGAAGGGGAACACTGAATGGTTAGTGAA
RM20091960937_72GT	GAACAGAGATGTACTGTTAATTCACTGAGCTCTTCAAGCAGGCAGAAATGACCTATTAGAAAAATATACTT[G/T]TATTAGTCC
RM20091960938_31CT	CTACCACCACAGATGACCAAACACCAATAC[C/T]TCTGCCCAGGGGATCAACCCATTCCTGTACATGTAGGGATCACATAACAA
RM20091960939_19CT	TTCTCTGATCTAAGGATT[C/T]CGGGGATTTACTTACATCCTAGACTAAGAATGGCAAAAAACTAAATATTTGACCAGCTCTCA
RM20091960940_18AG	GGGTACCACATCAGGGG[A/G]GATGTCTTCCCTACAACGCACAGCGTTGTGAGATTGCCTGCAATGACAAGCTCAGTCCGTTGA
RM20091960942_23CT	TCTGTAGCAGAAGAGAAGAGAA[C/T]GCACACTTTTATGTAGGTCAATGTTTTCAGATAAGCCTAAGAGACTCGTGCTGTTTAC
RM20091960943_64AC	TGACATTATCTACAGTGACTGGCACTCTGATGTGTACAGTACAGCAACCCAACAGGCTCCATT[A/C]ATTCATAAATCAATTGT
RM20091960944_17CT	TCCACAAAGAGAACTC[C/T]CTACCCAGGGACCACAGTAGAATCTCTGGGGAGCATTGCTCTGTGCTGTGCTGTCTGTCTGTCT
RM20091960945_5CT	AAAA[C/T]GACTCAATGAATAACCAGCCACTGGCACAATGTTAGGCACAACAAGCAACACTCAACAATACACAAATGGTATCAT
RM20091960946_4AG	CCT[A/G]TATGCGGGTGAGTTTAGGGTGAGGTGATGGCGGCGGTAGAAAACATAAATCAAAGCAGGTCCAAGGAATTGTAATCC
RM20091960948_71AC	AGCGGGAGATGTAATCCAATGTTATCCTCTACTACTATCATTACATAGGCCCTTTTTTTGTGATCTGATA[A/C]AAATGAACTA
RM20091960949_52AG	ATGTACTTGTAGTGTATGTCACAATGGCATAAAGAGATTTGGGAGACAGGC[A/G]CAGGAATGCGTAACAGGGATTTTTATTCA
RM20091960950_30CT	CATCCTGACATGACCCTCCAGCATGACAA[C/T]GCCAACAGCCATACTGCTCGTTCTGTGCATTTCCTGCAAGAAGGGAATATC
RM20091960951_77AG	CTAGTTTTATCTTAGCTTGATTATTGCCCGGTCACGTGGTCAGATGCGGCAACAAAAAGACCTAGAAAAAACTGCA[A/G]CTGG
RM20091960952_18AC	GTGATCTCATACAGTTC[A/C]AGTTCTCTATTTGTTTGCATTGAAACTCCAGCCAGTGGAGCAGGCCAATCTGATACACATCTG
RM20091960955_64AG	GCTATGCACCTGAAATAAGAACACACACATACATATGCATTCACACACTTCCCACCTGTAACC[A/G]GCGGGGTATTGAACTGA
RM20091960956_60AG	GTTGGCTGGAGGCAAACAGAGGAGACTGGGCGGCCATCTTGGATTCCCAGACTCTGACC[A/G]GTGCAGCAAAGGGCCCAGGGG
RM20091960957_61AT	AAAGGTAGGGTCTGTTACCTCACCTGGTGGTTGGGGCTGGTAGAGAGACATCTTCCCAGG[A/T]AGAGGGTGTCTTTGTCACAC
RM20091960958_22AG	TTGCTCAGCTGAGGACACAAA[A/G]AGAGTTTATTACTTATCATACCAATACACACACACATACCCACCTATACTCCTAAGGTC
RM20091960959_16CT	AGCAATTTGTCATGA[C/T]TGTGCACTATTTCCTCAGCTCCTGAGAACACATTCACTATTCACTATCAAAATTACAGTAACATG
RM20091960960_46AG	TATCATCCCTCCAGACAGCCCCAGGGTAGGTCACACGGACGGACG[A/G]ATGCTTACATAAATACATACAGTGCCTTCAGAAAT
RM20091960961_25AG	GAGGAGTACAACACACTGTCCAAG[A/G]CAAAGGTCAACACACTGTCCAAGGCAAAGATCAAGCTAGAACAGCAAGTGGACGAT
RM20091960964_17AC	TTTCACAGATATCTTC[A/C]TACCCATTACCCATCTCCTCTCCTCTCATCTCATCTCCCTTTGAAGAATATCACCTACTCCTCT
RM20091960967_75CT	GGGTACCACATGAGGGAGGAGGATTACAACAAGCTCAGTCCGATGATGCTGTGACACACCGCCCCAGACCATGA[C/T]GGACCC
RM20091960968_53AG	CGAGCGTGTGTGTTTCACTGTCCAATCCGAGGCTCGAACATGACCCGAGTGC[A/G]TGATTTGAGGCTGTTTGGTCTGTTGGGC
RM20091960969_12GT	TGACTGTGATT[G/T]ATGTGTTTATGCGTTTCAACACGTGAATGCATGCCTGCCTCAGCAGCTCAAAAATGACAACAATTTCCA
RM20091960970_9CT	GTCAATCA[C/T]GTAACCTCTCACTCCCTCTCTGTGCCATTCAATGTTGTTGTTTATGTATGTAGCTAGTGAGCTAAGCTGTAG
RM20091960971_48AT	CAGATCAGACAGTGGTTTATCGAGTGCCGGTGAGACAGGCAGGCAAC[A/T]GGGAAGTCTGTCTTCTTTCACAGTAGCTGTTTC
RM20091960972_79GT	CTGGAAGGTTTCCTCTTCAGCTACCTCTCTGTGGCTCCCAGACAGACAAGACAAGGACCTGACCTGGGGAATTGCAAA[G/T]AA
RM20091960974_14CG	TCAATACCAGATT[C/G]CTGATAGCGCCCCGTCCATTCGCTCTCCAGATTACATGATAAATGGGCCGGTCCATACGTTGTGACA
RM20091960975_27AG	CGAGACGGGTCATGGAGCCCAAGTGA[A/G]ATCCTGGCATTATGTTTCAGTAAATGTACAGTACACTATTTGTAAAGGCATAGC
RM20091960976_40AG	AAATTAACTAAATCTGAAGTTGAGCCGAAACTTTGGAGC[A/G]AACCAATGGCATCTCATTAAGGTGTCTCACAGGTTAAAGGA
RM20091960977_27AG	TCCAATGGGACTGGAGCTCATCTTGT[A/G]GTTAGACCGTTCCTTTCATTCCCTGTTCTGCAGGCACTGAGTAGATCCTAAAGA
RM20091960978_70CT	CGACACAAAACACAGAAAAATAAATATAAATCATGCCTTACCTTTGACAAGCTTCTTCTGTTGCCACTC[C/T]AATATGTCCCA
RM20091960981_33AG	CCGGGTTCACAGGTGTGACTGATGTGACTCTG[A/G]GGGAGCTGCAGACTGTGGTTGTGGTGAGCCAGTAGAAACAACTTGAGC
RM20091960982_66AG	TCTCTGACAGGTTGTTGTTGGTCCATCTTGATGAGGAAGCGTGAGAGTTTCTGCTGCCTGCCAGC[A/G]AACTCTGGTAGGTTG
RM20091960983_65CT	TTAAGTAAAGCATTACAGACCTTTCTATAGAAGCAGGACAGGCAGCCTAGCCTGTGACACACAG[C/T]TTGTGTCCCCCTATTT
RM20091960985_79AC	GGGAGGAGGATGTCTTCCCTGTAACGCACAGCGTTGAGATCGCCTGCAATGACAAGCTCAGTCCGATGATGTTGTGAC[A/C]CA
RM20091960986_23CT	CATCTGACGGGGGGTGGGGGGG[C/T]GCTGAGGAGTATTTCTGTCTGTAATAAAGCCCTTTTGTAGGGAAAAACTCATTCTGAT
RM20091960987_77AG	CCTCCATTGTAATATAGACACAGTGCAGTATAGTAGGGTTGTGGCTATATCCCTCGATCTACCAATCAGTGCAGAC[A/G]ACAA
RM20091960988_2AG	T[A/G]AATAAAACAATACTAGCTAGCTGGGTCTGTTGTCCTCTGCTACAGCTGCTTTGCTAGATAGTGAAGTCAGTGCAATGGA
RM20091960989_57AT	TAAGGCTTTATTACTTATTAGTTCTAAGCATTTATGAGCCTTCATAAGATTTATAA[A/T]ATGTTATGTCTCTCAATGTAGGAC
RM20091960990_77AT	GCAGCAGCAGACTCCGTCCATGTACCTTGTAATGCTCATGTTATGGGCAGCCCTAGCTGCGGATACTTGAGGGATC[A/T]ATTT
RM20091960991_34AG	TGTTCAGACAGATGGAGGAAACTGAAATAACAG[A/G]CCCTCAGAGCTCTGATGGCAGCACAGTCTCTTAATTGAGCTACCACA
RM20091960992_13CT	TTGTGAGAGACA[C/T]TGGCGGCCATAAGAGAGGACTGGGAAAAGTGGGTGGAGCGTGTGCCATACCTCTACAACCCTGGGCCT
RM20091960993_73AG	AGAAATATTCTACTCTCTTTGTTTACTGTTGTGCTATCATCAGGTAAAGCCTTTTTGAAATCTGACATATCA[A/G]CTGGATTC
RM20091960995_39AG	TCAGAGGAGGAGGAGGAGGACAACACCCGGAGGATGGC[A/G]GATGAGAGGATGGACATGCAGGAGGACAGGATGCCCCCTGGT
RM20091960996_78GT	TGGCAGGGTTAGGAAAGATATATAAGCTAAGTGCAAAGCTGATGCTAGCAAAGCTGATGCTAAAATCCTGTTCAAAG[G/T]GAA
RM20091960998_75CT	ACAACGGGAGAGAGCGAGATTCTTTTAGAGAAGCTTACTGGCTCTCTTTTCACCTGCTCAGCTTCCTCTGACAA[C/T]TTTTTT
RM20091960999_45CG	CTAGAATCAACCCTACAGTAGTCTGACTGGCTTTCCTTAGCCTT[C/G]CCCCACAGGCCCTAGAATCAACCCTACAGTAGTCTG
RM20091961000_17CG	AGGGCTGAGCTTGGCT[C/G]TTTCAAAACAGAGTACCTTTCTTTGAAAGCAAGTCTGTGCACACTGGCAGATAGCTAGCCAGGT
RM20091961001_20AG	AACAAAGATACACACACAA[A/G]GGACCTTAGCTACAGTGGCCACAATACACACACAGCGGCCCCAAAACACACACAGACAACC
RM20091961002_54CT	AGAGTGAGGAGGTCATTTCTGTGTGGCCTTATTTTTCTCACGAGTATGTACGT[C/T]AATAAGAAATGTCTACAGAATGTGTAT
RM20091961003_46AG	TGAAATATGCTGCTCCCTTTGTTTCATCAGATAATAGCTTCTTAT[A/G]CTTTCGCCGAAAAGCATTTTTTAAATCTGACATGT
RM20091961004_40AC	CATCCTGACATGACCCTCCAGCATGACAATGCCACCAGC[A/C]ATACACCAGCCTTGCTCAGTTTGTCTCAGTTGTTGAATCTT
RM20091961005_27AG	CAAGTGTTCCACATTGACTCCAGAGC[A/G]GAATCTGGGAAGGGAAGGTGCTCCTTCAATCCTAGAGTCAATACGGTCTCCGTC
RM20091961006_15AG	TGTGTTTTGTATAC[A/G]TACTAGCTGTCATAGTGGTTCTGAGGAGATCCTAAACCATTGGAATGTGTTTGTTTAAAATAAAGG
RM20091961007_69CT	CAGGTACAGGATGGCAACAACAACTGCCTGAGTTACACCAGGAACGCACAATTCCTCCATCAGTGCTC[C/T]GACTGTCCGCAA
RM20091961008_75GT	AAGGACCTGAAGCAGTACATGGACGACTGTGGGAACATCCTGAGCATGCAGAACGTCAAGGTGAGTGTCTACAG[G/T]ACACTA
RM20091961009_68AC	TGTCTCTTTCTATATGTGTGTGTGTCTGTGTATCCATATGCTTCCTCTAATTTTCATAGGTTGTCAT[A/C]TTTTTATGGTGTC
RM20091961010_76CT	TCCCATACCATGAGGTCACCGGGCCATCAGTCCTACGGCCTATTGGGATGATGTATGTCCACACCCCTTCCCCCA[C/T]CATGT
RM20091961011_63GT	CCTTGGTGGAAGAGTGGGGTAACATCAAGAACTGGCATATCTGGTGCAGTCCATGAGGAGGA[G/T]ATGTACTGCAGCTGGTGG
RM20091961012_20CT	GGTGAGGTTCCGGAGGTCC[C/T]TCCGCCCTGTCTGGACATCGAGAAGTCCCCGGCGTACATGATACGGGCCATTCTGGACTCG
RM20091961013_20AC	CAGAGATAGAGACGGGGAG[A/C]GAGAGAAGGTCAATATGAGCATCAAACGTCACCACTGCAGTTCTTCTGACATAATAACATC
RM20091961014_28CT	AGGGTCCAGGTGGGCATCTACCCTCGG[C/T]GGCGGCTCCGGTTCGGGGCGTAGTCCCCGCTCCCTACACTGATCCCTCCGCTT
RM20091961015_71AG	CCCCTCAGCTAACGTTTAACCTCCAATTCCCTACAGGTCAGGATGTGTCCTTTTCACAGTGACTGGCTGC[A/G]AAAACACCCG
RM20091961017_22CT	TGAAAGGCTCCATGAAATGTC[C/T]TTGAAGTGCGCCAGAAGGGTTTTCAGGGCGTGGTCATGTTCCTCGAGCTAGGCGCCTCG
RM20091961018_28GT	AGGAAACTGAGTTTAGGTTGAATTAGT[G/T]CATGTTTGCTGTTATGTATCTATCAAAACAATATACGGGTGCAGTATTATCTG
RM20091961020_79AT	CTGCATCTGCAGACTGACAAGACAAGGTTATTACCGGTACATTAGTTAAGTTGTCGTAGGGTCTCACAAGCTCCCCTA[A/T]GG
RM20091961021_9CT	AGTCATGC[C/T]CTCAGTGGGCTCTCCATCGATGGCCAGGATCTGATCCCCGACACTCAGACTGGCCTGGGCAGCCTTACTGCC
RM20091961022_72AG	CGGTCAAGTTGGAACAACAGACCCAGGCTGCCCTTTCGGTTTGGAGCTCACAGCAAAACAACAGTCCTTGC[A/G]GTCCTGGCT
RM20091961025_60GT	TTGTATGTCAATGTATGCAATAAAGCACACGCAATCCTAGCATGCGGCTCACCGTTTGT[G/T]TTGCCTGTGATTCCCCTCTGT
RM20091961026_5AT	CTGA[A/T]AAGGATGCCTATAGAGAGAACGGGGGGTTCCTGAGCCCTTTTCTTCCCCAATCACGCAATGGCAGGTGTTAGAATC
RM20091961028_68CT	GGTGTGACCTCGGAGAAGGTTGGCTATCTGGGCCTTCACCTGAAAGATAAAGAGAGACATTTAATGT[C/T]CTAATCTACCATC
RM20091961029_12AC	GATTCACAGCT[A/C]TAAGTCCCCCCATTAGTCTGTCTTTGATGTAATCTGTCTGATGTAAGTTCTTCACCATCACCAAAACCA
RM20091961030_5CG	CCAT[C/G]CTCCCCTCAAATGAAATCCACTCAACATTAAATGAACCCTTGAACATGTCTCCTGTATCTTCCTGTTATCCAATCA
RM20091961031_38CT	AGTCAGGTGTGGTGGAGGTTTCTGAGGAGCCAGGTCC[C/T]ATTTCAAAGACCTTCCATGATGCCCAAACACAGCAGTCAGACC
RM20091961032_50CT	CCAGAGTCAGATTACTCCCTGTAATCCTACAGGGCCCAGAGTCAGATTA[C/T]TCCCTGTAATCCTACAGGGCCCAGAGTCAGA
RM20091961033_62AC	CCCAGGGGCCCCCTGGAGAGGACGGAGACAAGGTACAGTAACCTATAGTTACATAGACAGA[A/C]AAGGTACACTAACAGACAG
RM20091961034_78CT	CTGAGCAAGGGCAACCGGGGAGAGCTGATCCCCATCTCCCCTGGAGGAATCACTCCACCCTCCATACTGACCCGCCG[C/T]AGC
RM20091961035_20AG	GAGCACCGCTCTTTGAACC[A/G]AGCCCTGAGGGCCGAGCAGCAGCTCTACTCCAGCTTGGTTCGCACCGTCAAAGAACAGGAC
RM20091961036_13CG	GTCAGGCTACAG[C/G]AGAAGGAAGGGAGGGGTAAAGTTACAATTTTGACATTTCAAAATTATACACATTTCAATATTTAAAAT
RM20091961037_48AG	CGACACAAATGCAGAAATAAAAATATAATTCATGCCTTACCTTTGAC[A/G]AGCTTATTTTGTTGGCATTCCAATATGTCCCAT
RM20091961038_16AC	GGCTGCAAAATGACT[A/C]ACAGTTCTTAGAAGTTCTTCTGGAGAAAGATCAACATATTTGACTTCTCTGGCAGAAGTTTGGAC
RM20091961039_7AG	GTGTAG[A/G]CCCAAAGCCTGGGAGCGAAGTGCCTCATACAGCCGGTCTTCATCACCACTCAGCAGGGCCTGCTCGGCTGCACT
RM20091961041_24AG	GAGAGGAGGGTGTCAGAGACCTA[A/G]AGCTGAGCCCCAGCCTAGTTTTTCCCCCTCACTTACTGCACTTTTATACAGTTCTGC
RM20091961042_30GT	TAAAGTAAAGTTTTACCAAAATAATTGTA[G/T]AAAGAAGGTAGGCCTACCAAAGGGAGGGGAGATTTAAACATTTGAATTTAT
RM20091961043_74AG	AACTGGTGTGTAATTGCATTTGAAAGGAATGTTGCACAAACCTCAATAAACAGTTGTCCATGCCCCTGATAAA[A/G]GCTATTT
RM20091961044_67AG	TAAAATATGCTTCTCTCTCTCTGTTTACTATCCTCAGATAATAGCATTGTTTGCTTTCGCCGAAAA[A/G]CCTTTTTTGAAATC
RM20091961045_39CT	ACTCTCTGCTAGCTGAATAAAAAAATGACTGCAGCTGA[C/T]CCGCTGCCTTGCGCCTACAAATACGAGCAGCCAAAATGGCTG
RM20091961046_42CT	CATGGTTCACCCAGCGAGTAGCAAACAAAGAGACTCTCTCC[C/T]CAAACTCCTGGGGTCTCTAATCATTTCAGTGGTCGTACG
RM20091961047_55CT	CTCCTGAAAGCGAATAGGCAGGATCTGAGCCATGGCGGTTCCTTTGCTCTCCTC[C/T]CGATTCTCCTAATGCTAACACACTAC
RM20091961048_75CT	GCAAGAAAGCATGCTAATTGTCTATAAATGTCTGTAATTGTAATGCAGTATAGCAGTGTTTCCCAATTTCTGTT[C/T]TGGAGT
RM20091961049_73AC	GGGTACCACATGAGGATGTCTTCCCTGTAACGCACAGCATTGAGATTGCCTGAAAAGACAACAAACTCAATC[A/C]GATGATGC
RM20091961050_9AG	AGCTAGGT[A/G]AAAGCTTTGCTATGTTAAAGATGCCTCTGTAGCAAGCCACCAGCTAATGATCATTACCATCACAAACTCAGA
RM20091961051_17GT	AAGAAAATGCAATTTG[G/T]CGGCCCAGTGCAGGACCGAGGCAGGGGACTGGGATGGGGGCATGTCTGCCTGTGGTTGGACACC
RM20091961052_21GT	CATCCTGACATGACCCTCCA[G/T]CATGACAATGCCACCAGCCATACTTGTAACGGATGTCGTCTGGAGATAGAGAGGAGGACC
RM20091961053_53AC	CTGGAAGGTCTTGTTCACCTACGAGTGAAGACAGGGATCATAGAAGAAAACC[A/C]AAAATATTTAATGATAATTTTTTTTTGT
RM20091961055_78CT	GTCTTGAGAAGAGCCGACCGGGCTCTCTTCCAGGTATGGCGATAGCAGAGGACAAACATCTGGACAGAGGGTATGCC[C/T]ACC
RM20091961056_19AC	GCGTGCTGAGCTGGAGGA[A/C]CTGAGGAAGCAACTGGAGGATAACAGCTCCCTGGCAGGGAGAGCTCTGAGAGAAGAGCTGGA
RM20091961057_9CT	TGGTACCA[C/T]ATGAGGGAGGAGGATGTCTTCCCTGTAATGCACAGCTTTGAGATTGTCATTGCAGGCAACAAGCTCAGTCCG
RM20091961060_68AG	TTGAGTACAGGTGTTACCCATTTCAAATGGATCTAGTCTTGCCCTTCCTTCCCAAATCCAAATCAGG[A/G]AGAGTTCTTAGTT
RM20091961061_40AG	TACACCTGAAAGACAGGCCCCCATATAGCAAATGAACAC[A/G]TTCTCTTTATTTTATTACAGGAAATGTATTATGACAATGTG
RM20091961062_75AT	TCGGGGTAAGTCACCTGGGAGAGAAGAGAACCGCATACCATAATCCAGATCAAGCAAGCCTCATAATCAGACAT[A/T]TTGTAT
RM20091961063_72AT	TCCCACGTTCATCATGTCATTGCAGCGTTTGGGCACAAAGCACATCACCTCTACCGCTTTCTGTGTATGTG[A/T]ATGTGTGTG
RM20091961064_37CT	GCGCCACTACACCCCTGGTGAGTAGTAATGCCGTGG[C/T]AGTCGTGAATTACATTTAATTTTGGGGGGTAATTTAGGAGATGC
RM20091961065_43GT	CACATTCTTTCTTTGTCTTGTCTATGAAAACCAACATTTATA[G/T]GATGGATAAGCTAGGTGAATCATGACGCCATATCTGAC
RM20091961066_41AG	AGTCTAAACAGCACTGGGCTTATCTGAGCCACCCAGAAAG[A/G]TGTCTGGCCTGCTCCAGAACTAAGACCAGATCTGCCTGCG
RM20091961067_38AT	GGATAACTATAGGATACGTAACTGATAAAAATGTGTT[A/T]TTGGACACAGAAACTAGTATTTTGGGGGTGATCCCTGTCCTTG
RM20091961070_51AG	ACAACAAACAAACATATGGATTGGAAGATCTGGCTGTTAAGAGAAATACT[A/G]ACATCTGCATGGAGCACAAGTCCGTCCTTC
RM20091961072_2GT	T[G/T]AAATATGCTATTCTCTCTTTGTTTACTGTTGTGCTATCATCAGATAGCTTCTTATGCTTTTGCCGAAAAGCCTTTTTGA
RM20091961073_19CT	CACCTGTCACCATCTGAT[C/T]GTGCTAAGACATGATGAGCATAGTGTTGTGAACTGACTGAGCAGCTTGACAGTGAAGCCCGT
RM20091961074_5GT	ACCC[G/T]TCAACTGACACCGCTCCTGTGTCATGGTTTCCAGTTCCTCTCCTAGCTGCTGTAGCTGTACAAAAGTTAAACATTT
RM20091961075_40AG	GAGACAAAGAACACTGATAATAACACAGTCACACCCCTA[A/G]ATTGATTCACCTCATAATAACTAATATGTGGAGAGATGCCT
RM20091961076_54AT	TTTCTCTTCACCAGATAGATATAATTTTATGTCATGTTAGTTTATTTTTGCCC[A/T]TGGTTTGCTGACATCCACTTGAGTGTG
RM20091961077_62GT	AGCATGCTTTATTGAGACCAGCAGCTGGTTTACATACCACACAGAAAATAGGAAAAAACAG[G/T]ACAGGAAAACAAGACCTCC
RM20091961080_65GT	ATCATTATCTCTGTTTTATACCGCTTTGTTGTGAAAGGTGCAATAAAAATCCATGAGATAAATG[G/T]TAGCTCCGTGTTATTC
RM20091961082_27AG	CAGAGATAAGAAAACATTTTCACAAC[A/G]AACCAGCCAAAAAGCTGGCCCAACCATTCCACTGGACCTCTTTTTGTTCATTCA
RM20091961087_67CG	AATATGGGGGGTGTTTGTTTGTGTGGGTTAAACCATACAGTCATTGGTCAAACCATATTCCACCTG[C/G]GGGGAAAGTTAACC
RM20091961088_8AC	TTCTCTG[A/C]TCTAAGGATTTCAAGGGACAATCAAGTGACATTTAAGTGACACTGACAACATGGTCGTGGACGGAATTACAGA
RM20091961089_33GT	ACCATGACTGTTTTAATTGAGTTCATCTCAAT[G/T]ATATATTATAATGTAGAATATTCTCAATTACATTTGACACCTGGGTTT
RM20091961090_44AC	TACAACTAGTTTTATATTGGATATTCAGTTATCTCGACTATAA[A/C]TACAGTATGACAATTAAAATAGTATATTCTGAATCAG
RM20091961091_16GT	TGTGATATTGTCAAC[G/T]TCCATTTCCTTATCTAGTACTACAATCGTCTCTGAAAGGGTTGTGAGCTCTCTGGTCAATGCCTC
RM20091961092_29AC	AGGTCGGTCTGGGAAACTTAGTACAATT[A/C]GATTTTTTATTTGATTTATTAGAATCTCCATTAGCCAACACCAATGGCGACA
RM20091961093_10AG	TATTTTCCT[A/G]CGGCTAGACCCTGTTTGACTACTGTAGTTTATTGTTCACATTGTTTGCCTACAAATGGTCCCATATGGGCT
RM20091961094_16AT	TAATAGCCCGACACC[A/T]GGACAACTTTAATTCTCAACGGATTATAGATTTTGTCCCTTTTGGTTATCTAGGTAAATTCTATA
RM20091961095_9AT	AAAACTAA[A/T]ACTTTGAGTCAGGCGGTTTGAAAGAAACTGTCTTGTCTTAACGTACTGTGTGGTTAGGGAGGGTTTGGGGCC
RM20091961096_70AT	TGTTGGGTCATTGTCCTGTTGAAAAACAAATGATAGTCCCTCTAAGCACAAACCAACTGGGATGGCGTA[A/T]CGCTGCAGAAT
RM20091961097_14AT	GTTGGCTGGAGGC[A/T]AACAGAGGAGACTGGGTGGTCAACTTGGATTCCCAGACCCAGACAGGTGCAGCCAAAGGCCCTGGGG
RM20091961098_53CT	AGGGCGCAGTCGGACCACTTGATCCGGGTGATCCCTCACACCTTATGCAGCT[C/T]GTTGAGTGCAGTCTTAGTTCCAGCAGCA
RM20091961099_59CT	AGAGGTTTGTCAGAGTAATGTAGCATAGCGTAGTGGTATTAAACTGCAGGATATGCAG[C/T]TTTTATTAAATCAACATTAAAG
RM20091961100_2AT	A[A/T]TGTATCATTGGCATCATTGCCACGGGTAAGGGCAAGCGAGCATATTCAAGTGTTCTTCACAGCATGAAAGAGTATTTGC
RM20091961101_58AC	TGTGTGAGTTCTCCCATCTTATCACACTGTACACAAATGAATGCAATACCAGTAATT[A/C]CGATAATTATAATGTCAAGTTCT
RM20091961102_30AC	GAGAACCACATAAGGGAGGAGGATGTCTT[A/C]CCTGTAATGCACAGCTTTGAGATTGCCTGCAATGACAACAAGCTCAATCCG
RM20091961104_49GT	GCGCAACAGCTTTAAAGGACTGTAGAGTAGATGCAGTCAACAGTGTCA[G/T]TACATTTCCAGATCAGAACGAAGTCTCATATA
RM20091961105_39CT	TGATGTTCAGATGTACCCATCCTGTGCAGGTGTTATTA[C/T]GATCAGCTGTCCATCCTGTCTCCCTGTAGCGCTGTATTAGGC
RM20091961106_12CG	CCCCCTCTCCT[C/G]TTCTCTCTCCTCTCCTCCACTGTTGTCATTCTGATCAAACACCAACAATTCACACAACAGCCATACTGG
RM20091961107_59AG	CTTTATCTTGTTCTGGGATGTGAATGTTTGGCTGGTAGCCCTTACCACACGACTCCCT[A/G]GGTCAGCCCACAGAGACATGAC
RM20091961108_33CT	GGAACCGCTAGACGCCTCCTTTCCCCCGTCCA[C/T]GGACCGCTCGTTCTCCTTCTTCATCCACTTCTTCTTCTCCCAAATCAC
RM20091961109_81AT	AAATCCTCCCCTTTTTTGTGGTCGGTCACCCTCTCTAAGCACGGATGGAAGTGCACCATCCCAAAATGCACTGGATGTGT[A/T]
RM20091961110_59CT	TGCGTTACACTCAACAGCGAGCTCCACAGACGGCTTTGTTACTTTAGATACATGAGCA[C/T]AAGCGGGGAAGGGCAGGAGGAG
RM20091961111_50AT	CAGAACCCGCCCTGTGTAAGTTCCCTGTGGAGAGAAGAGACAAGCAGGT[A/T]GGGGTCACTTACTGTACTGACCACTGCCAAA
RM20091961112_5CT	GAAA[C/T]CAATGTCCAGATGGGGTGGCTACTTGCAACTACCAACCTGCTCATTACAAATCAAGTTGTCCCTGAAGTACTGTAA
RM20091961113_56CT	CAAGCGTCAGTCTAACAGTGTAATAAGGGTACGAGGTTGTAATAAGGGTGTAATA[C/T]AAATGTGCTTTGGGATGAGGGTGGG
RM20091961114_7AG	AGCAGA[A/G]ATACATCTAATTTATAACATAATCATAATTGTCATCTGTCAGTCTCATAAACTTGAATGTTTTCATTTGTTCTG
RM20091961115_78CT	GGAGCTGGGAGGCTGAGTGGGCTGTGGATGACAATCGGGCTGTGGATGAGAAAGGTCTGCTTTCACACACTGCTTGA[C/T]CTT
RM20091961116_67CT	TAAAATATGCTACCCTCTTTGTTTGCTGTTGTGCGATCATCAGATAATAGCTTTTTCCGAAAAGCC[C/T]TTTTAAAATCTGAC
RM20091961117_46CT	CCTCTTCATCGCCTCCACTTTACGGAACTCGTAGCGGATCTGAGA[C/T]AGCTGGTGACGGACCCCCTCGCTCTCCTCCTTGTA
RM20091961118_41CG	TTTCATTACTATTACTATACATTATCCTCAATGGATTGCT[C/G]TAACAAAATGTTAGGCTTGTTCATTTGAAGTCATTGACAG
RM20091961119_80CT	TTGCACCTGCTCAGGTGGGAAGATATGTCAGGGCAGTCCTGGCTGGTCTCATAGGAACGACCCTGGAAGTCCTTGTCCT[C/T]G
RM20091961121_43AT	CATCCTGACATGACCCTCCAGCATGACAATGCCACCAAGCAT[A/T]CTGCTCGTTCTGTGTATGTGATTTCCTGCAAGACAGGA
RM20091961123_65GT	CAGGCTACAAACCAGCTAAAACTGGTGGTGAGTAGAAAACACTTACTGCAAAGCCCTCCTCTAA[G/T]AATTGTCCCTTAGCTG
RM20091961124_39CT	CATCCTGACATGGCCCTCCAGCATGAGAATGCCCCCAG[C/T]CATACTGCTCGTTCTGTGCATGATTTCCTGCAAGGCCATGGC
RM20091961125_56GT	AGCTACTGGGTGTGAAGGCTTTTGCTTCAGCCATACTGTATTCAGTGGTGTAAAT[G/T]ACTTAAGTAAAATTATTTAAAGTAC
RM20091961126_3CT	AG[C/T]GTTTGAAAAAACAAACACATCAGAACTCTTCATAGCATTAACTTCATTGAATTGGACCAAAACTGTGCCTTTCTATTT
RM20091961127_18CT	TCAGACTAAATAAAGAC[C/T]TGCTCCTCTGCAGACTACAGCTCCTGTAAAATACAGCTCTGTCTCAGAGTGCAGAAACAAAAC
RM20091961128_27AG	ATGAGGTCACCCCAGACCCAGAGACA[A/G]AACCTGACCCTGACAGCTAGTCTGCCTACAGCTCCTGACTCCAAATGGACTACA
RM20091961129_1CT	[C/T]TCTCTGATCTAAGGATTTCAGGGCTTTATGTACCTCCTGCAGCAAAAAGCTAAAAGTTTGACCAACTCTCACTGGTTTAT
RM20091961130_12CT	TTTAAAACACG[C/T]CTGGACTTGTTTGCCAGCAGATGCTCAACGTGTGCATCTTTTAAAAAAGGGTCTGAGAGTCCCTCTGTG
RM20091961131_33CT	GCTCTGACCAACATTGGTAAGTAGTAGAGGAT[C/T]CATAAGCAGATAAGATGAATATGTGAGGTAGGTATACTAGTGAAAACA
RM20091961133_8CG	CATGACA[C/G]TACAATGAGTAAATGACAGTGGCCAAATATTCTTGAGAGCATGTGTTATCTATAGCAGTAAAACCACATGAAT
RM20091961134_17AG	GGCCAGTAGTTTGGCC[A/G]CAGAGTTCACAGCCAGGATGTGCATGGTGTTCACCATCAGGTAGTCAGCCAACCGGATGAAACT
RM20091961135_26AC	TATCATTATTAAATATGTATTCATT[A/C]ATTGAAATTATTCCTGTTTTGATGATAAGCCGGGAATGTTTAAGATGCTTATTAG
RM20091961136_62CG	CATCACGTCGTCTCTCTCGTCACCATGCTCAGAGGTACAGTGAATTGCTTCAGTAATGTTT[C/G]CCCCTTTATAAACCTTTGA
RM20091961137_62AC	GCTCCTGAACCTCATCTCTAGCACACTGTCAGCTACACTTCACCAGCGCGATCTGTGCCCA[A/C]GCCATGAATTTGTCCCCTT
RM20091961138_28AG	TGAAATATGCTACCTTCTTTGTTTACT[A/G]TTGTGCTATCATCAGATAACAGCTTCTTCTGCTTTCGCCAGAAAAGCCTTTTT
RM20091961140_58CT	ACATGGCTGACAAGTAAACATTACTTCTCAATGTGGTTAACAGACATTTTCCTATGT[C/T]GTTTTAAATAATTTAGCACTTTT
RM20091961141_33CG	GAGATTTCTGTACTGTTCCTCATCCTGTCAGA[C/G]ACACTGGGTAACACTGCACTGGTTTTAATGGACTCCAAAACAAGGCTG
RM20091961142_12AG	GATTGAACACT[A/G]GACAGAAGCAGTACTCAAATTACACTGCAACTGAATGACTTGCAATCCCACATTTTATAGAAACAGGCC
RM20091961144_48AG	CTACACCAAACACAGAAATAAAATATAAAACATGCCTTACCTTTGAC[A/G]AGCTTATTTTTTTGGCACTCCAATGTGTCACTC
RM20091961146_9AG	CGTCTGAG[A/G]GGATGTGTGGGGAGATGCTGAGGAGTATTTCTGTCTGTAATAAAGCCCTTGTGTGGGGAACAACTCATTCTC
RM20091961147_35CT	CGCGTGCTACAGGTGGGTGTTGCTATGGTCATGT[C/T]CAGTGTAGCTGATGGTGAGAAGGCTCAATCCACCAATGTTGTCCAG
RM20091961148_74AC	CCTTCAGTGGGGTTGCCCTCTGAGATGCTTGTCCTCCTCCACTGCAGACCCAGAGCTGCAGCTGCAATAGGCT[A/C]CGTCTGA
RM20091961149_47AG	TACTCACATCCAGCTTGCACTCTGTCAGTATCAACTGCTGAGCTGA[A/G]TCTGACGGCTAACAAAAACACCTATTACATCCTC
RM20091961151_44AC	GCTAAAGCTAACCAACTAGGTTAAATGTTAGCTAGCTAGCTAA[A/C]ATTAGGCTATAACTAGCAATGCAAATACTTTTCTGAG
RM20091961153_75CG	CGATCAATACCCAGCACCAGCCATTCTCCAGACTTCATTCCTCAAGCACCATTGATGACCTTTGATCCCCTGCA[C/G]TGACGT
RM20091961154_51CG	TGGATATGGGTCTGGGGCTGGGTCTGTCTGAGTGGACCTGGTACACAGCA[C/G]GGCTCCCAGGGCTGAGAGTGTTGAGGTGCT
RM20091961155_62AT	ACCTTGAAGCTGGACTCGCTAGTCTCCATTGGAAAGGTTAGATCCATTTTGAGGGAGATAA[A/T]ATGTGCAAGTTGTGTTTGT
RM20091961156_45CT	TGAGGCAGCTAGCTGGCTGGCTATCCTCTGTGTGGTATCCTCTG[C/T]GAGGATGGGGGGAAGGGGAGGAGCGGCAGAGGCAGG
RM20091961157_33AC	TGCACTTTGACATACTCCAGTGAAGTGTGATG[A/C]TTCTGACTCAGTAAAAGGACCCACAGAGAGTTATGCACACAGGCCTGC
RM20091961158_58AG	ATCTACTACAACATAAAGACAGTTGTGTTATAGAGTCAGAGTTAGTTATCTACTACA[A/G]CTCCACTACAGTATAAAGACAGT
RM20091961159_30CT	CCCCTCTGCCTCTACTTCTTTCTCTGCCC[C/T]AAGGTTTACACAGTTTGCACCATTTTGTTGACGTTCTCTCCCTCTTTCAGA
RM20091961160_30AG	TCTCCCTAGATATGACAACCCTGGAAAAG[A/G]TCTCTGGTCATTGTTGAATGGGAAGATAAAACGTAATATTGGTCAGAAAGA
RM20091961161_37GT	GAAGACCATGAGGTCATGGACTTCTTCGAGGAAGAT[G/T]CTGTTGTTGAGGAGTTACTTGGTGAAGATGAGGACAAAGAGTAT
RM20091961162_63CT	CGAACACTCACAGGCCACAAAGAAAGAGAGAGAGAGAGTGAGAGAAGGTAGAGGCTGAGTAA[C/T]GAAAGGCAGGGCAACCCA
RM20091961163_40GT	GTTATCAGCCAATAGGATGTCCTGGAGCTGTGATAGGGG[G/T]CGGAACGCATCTTCATCCACACCAGAGATCTGGTTCCCTGT
RM20091961164_67CT	AATGAACTGGAGAAAATCACCAGAAGATTCACCATTGAGCTGGCCAAAAAGGGTTTTATTGGTGAG[C/T]CGTGTCTGTGATCA
RM20091961165_61CT	CCCGGTGCTCACAAGGCTCCCATCATTCTGCCTCCAGAGCTCCAGCTCTACACAGACACC[C/T]CAGTAGGACGACACCCCAGC
RM20091961166_34AG	GATGCTGATTGGGCGGCTGCCCTGGAGGAGATC[A/G]GCTGTGTGGGAGAGCCAGGTGTGCAGCTCGTCCAGAGTGTTCTGGAA
RM20091961167_20CT	CGGAGCCCGAGTCCAGTCA[C/T]GTGGTTCTCCACCTCCCACAGGCCGTGTCATAAGTAACTCCTCGCTCCTGACTGGCTGCGA
RM20091961168_6CT	TGTAG[C/T]GGCAGAGAGATTTGAGAACTCTTTGCTCTACTTAAGACTTTAAGACTTAGTATTGGGCTGAAATAGCAGGTAGTT
RM20091961169_64AT	GTGTGTGGTAATGTAAACCCTTGTTTCTGCTCTGTTCAGAGGCTTGGAATATAACGGAGCGCT[A/T]GCTGTTCATGGGTAGAG
RM20091961170_39AG	TCCTCTGTGTTTACATCATACGGATTAGCTGAGTTTGG[A/G]TTAACATATCAGTGTGTGTTTTTGTGAATATGCAAACCTATA
RM20091961171_18CG	GGGTACCACATGAGGGG[C/G]ATGTCTTCCCTGTAACGCACAGTGTTGAGATTGCCTGCAACGACAACAAGGTCAGTCCAATGA
RM20091961172_76AT	GTTCCCAGGACCACCGCCATCTCTTACCCTTCACCCCTCTGCACCCTGTGTTTGAGGTGGAAATTGCAAATGGTT[A/T]TATAA
RM20091961173_39AC	CACAAACACACAGACCGAAAGTACAGGCCATACACATT[A/C]TTTTCCCTTTCCCTCTATCATTTTATCCTATTCTCCCTCATT
RM20091961175_67AG	AACTGGTGTTCTCACTCCCCTCTTCTGGACACCCTTGAGATGAGGTGTGTGTGTGTTTGTGCGTGC[A/G]TGGGTGCGCAAGTA
RM20091961176_47AG	AAGAAAGACATACAACCGGTGTATCTGAGCTTGGCTTAGTAGCTAT[A/G]CAATGCTTGTCTGCACTGAGCTAAGAGGGGGGAA
RM20091961177_31CT	GTGGTTTGATCCCCGTTCACACTTTCTCTG[C/T]TGTATCATCTAGCTCCCTATTTACAGCACATTGCTATCTGAAGATAAAAA
RM20091961179_13AC	GCCATAGTGATT[A/C]TTTAGATACTGGACTCACACACTGTTGAAACTGTAGCCATTAATAATAATAATGCATTTCATTTGTAA
RM20091961180_64AG	ACAAAGTTCTTTGTTTGTCAGACGAATCACTAGAATCATTGACTCACTCACGCGTTGAAAAGG[A/G]CGAGGAACGAGATGGAG
RM20091961181_67CT	GGGTACAACATGAGGGAAGAGGATGTCTTACTCAACACACAGCGTTGAGATTGCCTGCAATGATAA[C/T]AAGCTCAGTCCGAT
RM20091961182_3CT	GG[C/T]TGGGCCTGGGGGTCACTCTGGGGTGGCTCTCCGTCGGACACGAAGCAAGGGATGACGTATCGACTGTAGTGCTCAGGG
RM20091961183_47AC	CAATCAAGACACCACCATTCAATCAGTCAAAGGTTGAAATTAATTT[A/C]TATAACAAATACTTAAAACCTTGAAGAACATTTG
RM20091961184_57CT	TTTGTCAATCCTACAGGGTTCCTGTTGGACACCTGCACAATTCCTTCACAAAGGGT[C/T]GAATTCCTACAGGACTTTTTTTTT
RM20091961185_68GT	TGCCATATGTGCACAAAAAAAATTAATAACTTGGAGGGGACTTTTATTTTGACATGAGGTAAGCAAA[G/T]AGTAAGTTGGTCT
RM20091961186_50GT	ACACAGCGGTCTATAAGAATGGAGTGTACTGGATCATGGGCCGCACCTC[G/T]GTGGACATCATAAAGAGTGGAGGCTATAAGA
RM20091961187_41AT	GGGTACCATATGAGGGAGGAGGATGTCTTCCCTATAACGC[A/T]CAGCGTTGAATTTGCCTGAAATTACAACAATCTCAGTCTG
RM20091961188_55GT	GCCTTTGAAGTGACCTCCCCAGGGGGCAGTGGACTCCCCCGGTGGCAGACCCCC[G/T]ATGTACACCACATCCCCCCGTTCCAT
RM20091961189_10AC	AACAGACAA[A/C]GCCTAATTTACTCAATATCCACAAACCCAACCTAACAATGACTTACTTGACTTATTCCTTATTCTCCTGAT
RM20091961190_61CG	TGGGATGGGGAGAGGAGGAAAACACCCATCCACTGGAGAGGAGTGGCCACCATACAGGAC[C/G]CTCGGCTGTTTCAAGGTAAC
RM20091961191_70AC	AGATTAGCCAAATGAATTGTCCTGCTCTGAAGGAGAGGTTTGGTAGTAGAGCTGCAGGGACTGTTAGAG[A/C]TAGTTTCCTCA
RM20091961192_2CT	A[C/T]GAATTATATTTACTTATTCTCAACATTCTATCATTTATTTAGGGTATTTCTCACTGCAGTGCTCGCTTCTCACTGTGGC
RM20091961193_48AC	TCCCCGGGCCTTGCTGGGGTTCTTGCAGAGCTTCAGCAGCAGCCGGG[A/C]CAGTTTGATGGAGTAGAACGCATGGAGGTAAGG
RM20091961194_72CT	GAACAGGTCAAGGGCAGAATGTTTCCAGCTTTTATGCTCGTTCTACCGAGGGGCTTTGTGTTGTCACATTC[C/T]CCAGAGAAA
RM20091961195_4AT	TAT[A/T]TTCACAATTCTAGCTCATGGTTAGTTCCTAGGATAATGCAACTCATACATTTACACTCAGAGCCTCCTGGGCCCTGT
RM20091961196_78AT	TTGCTTTGTGGAGTGTGGTGTCTTAAACGCAGAGCATCTCTTTATTACAAACAAACCTCTCCCTATCTTTACAACCA[A/T]TGA
RM20091961197_62CT	CCAACATCTCCCTCTGAAATGATTATTACAACCACACACAAGATAGCTTTTGGTAATTATA[C/T]GTAGCATAATTAAATTTGA
RM20091961199_9AG	AAAAGAAA[A/G]CCAGACCATTAGTTAAGAATAATAGCAAGACGGGCTTGTAGTGCTTTCGACTGAATCGTGATTGTCTAATAC
RM20091961200_16AG	TTTGAGAGTGACCAG[A/G]TTTGAACAGATATGCTGTTGTCTGTAGATGGACTCCGACAGCAGGAAGTGCAGGTTGTGGAGGGG
RM20091961202_41CT	AGGGAGAGTCGTGATGCTGAGGTGGCGAAGAGGTGTCTGT[C/T]GGCCATAGAGGAGTGTGCTCGTACCAGGGAGGGGAACCTG
RM20091961203_67CT	ATGTGCAAATGCGCTGCAAAACTGGTGATTCCATGGTCCAATGCAGTAACAGAGACCACCATGTCC[C/T]GCTACAAGGGTAAG
RM20091961204_47CG	TCGGGTAATCACAGTGAGTCCCTACAGTTTCTACTAATTGCATCTC[C/G]TCATACACTTGTGGTTTTGGGATTTTCATGGCTC
RM20091961205_71AG	AGTAACAGGACCATGGCAGGACAGCATGTGTCTCTCTGCCATCAACATAATGCTGCCAGTGCACGTTTCT[A/G]GCTGCCATCA
RM20091961206_73CT	GCAGCTCTCTGCCGGGGTACAGGTGGTGTTGTGACACTGTAGCACCCCTCCACCCAGACACACACACTTCTC[C/T]TTACAGCC
RM20091961207_65AC	TCTTTCATTTTCCAAAAAGGGACAACTCTGTCTATTTTTCCCAGAGATTTAGAATTTTTACAAA[A/C]CTAAGGTTATAGCTCT
RM20091961208_11GT	AAATAAAAAA[G/T]AAACTAAATGTTAAATGTTAGAGCTTTGAAATGTTGTTTACTTTGTTGTCTATGTGATGTGTCATTGTGA
RM20091961209_43AC	ACTCATGCAGACCCTTTCTCTGCTTTCCCAACTACACAGATT[A/C]ATTTCCTTTCCACACCTGTTTTCAATAAGCAGACATGA
RM20091961210_65AG	GTGATGGGATGCCAGGGCATGGGGGACCGCTTGGACCATCTCCATGACATGGTGAGTTGCTTGC[A/G]CTCTCTCTCTGTTCTT
RM20091961211_33AC	GGGTAACACATGAGGGATGGGGGATGTCTTCC[A/C]TGTAACGCACAGCGTTGAGATTGTCTGCAATGACAACAAGCTCAGTCC
RM20091961212_43AT	CGTGTCACTTAATGTGGATTTAAAACAAATATTGGATGGCTC[A/T]AAGCCTAGACTCAAATCTCTCATCAGCTATCATTAAAA
RM20091961214_48AC	TCACGTTCGTTTGTAGAGACAGACCAAGCGTATGTTGAGATCCACAT[A/C]ATTTATAGTGCAACTTAGCAAAACAAAACAATA
RM20091961216_57CT	GCTGACCAGGAGCGCAGTGGCATTGGCAGTGTTTGTGGAGACATACAGCTGAGTGT[C/T]ATCTGCATAAAAGTGAAAGCTCTG
RM20091961217_41AG	GGGGACCACATGAGGGAGGAGGAAGTCTTCCCTGTAACGC[A/G]CAGCTTTGAGATGGCCTGCAATGACAACAAGCTCATACCG
RM20091961218_21CT	CAGAGAAGCAGCCTACCCAT[C/T]TTCCTGCTGTCCTATTTTAGAAAAACCCTCACACCAACTACATTTCACGTGGCCAGTGGA
RM20091961219_75CG	ACCAGGATAGCCACTGCCTCCGAGAAAGTATTACAACCCCTTTAGAACTACTCATTGGCTTAACCCTTTTAACA[C/G]TACTCC
RM20091961221_50AG	CTGGATTACTTACATGGCCAGAAGAAGATTCACAGAGACATAAAGGTGA[A/G]ATGACCAGGGTTGACTCCCTAATCTGCTGGG
RM20091961222_19CT	GCGGGTGTTCATTTTAGA[C/T]CCTGTTTCTACATAAAGGATATGGCTAACGCCAGAGTCATGAGACGTTTCCAGTGGTGAATA
RM20091961223_5CG	TTCT[C/G]TATGCTCTTACTGGTAACGGTTTGCTTGTACCCAGCGCACTAGGTGTTTCTTTGCTCAGTGGTAGTGATTTATGTT
RM20091961224_9AC	CTGCGGTT[A/C]CGTGTGTTTAATTACAGCTGCATAGACTCTTGCCAGCATAGGACAATAACTATTTGGACACATTAATTTGCT
RM20091961225_49AT	GGCAGCGAGGCTTGCTTTGCCACCAGGCACTTCAGTAGCTGTATGTCC[A/T]TCTCTCTGTACACTGTGGAACAACAGGGCTGT
RM20091961226_75CG	GGGATCAGAGCACAAGCTATCTTTTAGTAACTGGAAGGCGTCTGCCGTCTCTTCCTTCCATGCTACGCAGTTTG[C/G]CAGGTT
RM20091961227_49CT	ATCTGTAAAGGGCCAGGATGAGCCTCGGCTACTGAGCGAAACAATTAC[C/T]CACAGCTGTTCCACCATGAGCAACTCCACTTC
RM20091961228_70AT	ATAACGATTATAAAACTACAAAGCTAAGGAGGAGCCGTTGTCTGAAAATGAATGCACCTGACCAGAATC[A/T]TCTGTGTTAAA
RM20091961229_41CT	TGAAATATGTTTTTTTCTCTTTGATTACGGAGGTGCTATC[C/T]TCAGATAATAGCATCGTTTGCCTTCGCCGAAAAGCCTTTT
RM20091961230_45AT	ACGGGTTGATTCCTTGTCTCATAATACGACTCCCCTCAGGAGAC[A/T]GGGGTTGATTCCTTGTCTCATAATACGACTCCCCTG
RM20091961231_69CT	CTATGTGGAGACCAGTTGGTGGAGACAGGACTCTCCCCTTATTAATATACTGTGGTTTAAATCAATAC[C/T]AGCGTTGTCTGT
RM20091961232_76AG	TTCAAGCAGGCCTTCTCTAACTACTCACTGACCTCTGAACTCTATGAGTCGCTCTGCAACCGCACAGAGGGCATG[A/G]CCGAC
RM20091961233_68AG	ATAGTGTTAGTCCTGTAGGGTATAGTGTCAGTCCTGAAGGTCTGGTGGGCTACAGTATCAGTCCTGT[A/G]GGGTATAGTGTCA
RM20091961234_62CG	CAGTTCCCTGGTGTCCTGGGTCTGATAGATTGTGTCCACATCCTGTTGGGCAACATGGAGA[C/G]ACTTGACCAAGATGGGAAT
RM20091961235_27AC	CACCCCGTCGTGGTCCGAAAAGAAAA[A/C]AGGCAACAGCCGCCCAGACAACTGACCCAAAGACCTGGATAGAAAAACCCCCCT
RM20091961236_80GT	TTGCTTTGTGGCGTGTGGTGTCCAAAAAATCTCCCCATCTTTACAACCCTTGAATCTACAGTGGGGAGAACAAGTATTT[G/T]A
RM20091961238_18AG	TTCGTGGGAGAGGTGAA[A/G]AAGGTTTTTTATGCCTCGTTTTATGCCTCGTTCTCTGGGAAAGAGAGTGACTCCCCCGAGAGT
RM20091961239_81CT	GCCGAGTCTGAGGGAGCCACGGCTTTCCTGAAGGCTGCGGAGGCCGTCGATGATGTTCCGTTCGGCATCACCTCCAACGA[C/T]
RM20091961241_2AC	C[A/C]ACTACCAGGTCACTGTGTTTTTCTCTGACATATGCCCTATAGAAGGAAGCCTTTTCCTGGTTTAATAAGTTGAAGTCCC
RM20091961242_62GT	AAAACGACATGAGAATAATATTTTTTCAACACATTAAAGCCCCCATGCAATCTTGGTAATT[G/T]TATTTTTTAAATCATCACT
RM20091961244_43CT	CAATGGGTCAGGTAATTGGCAAGTTTCACTTCACACACTTTG[C/T]TGAATTGTTATGAGCCAATCTTTTCCGTGAGTATTTCT
RM20091961245_62CT	GAGAGGAGTGAGGGCTGTAGGTGTTTCACAATATGATGCAGTGACATCTGTTAGCTATGGT[C/T]ATCGAAATTGCTAAAAGGT
RM20091961246_26AC	ACTTGTGCACAAGGTTAATTAACTT[A/C]TTGGCGCACCCATCCCGTTAGTGGGATCATTTTTGTCAACATCCGCTGAATTGCA
RM20091961247_66AG	AAAAGTCTGACCACAATGGATCAAAGCAATCAATCCATACATTTATGTTATTATGTGAGACTGTA[A/G]AAAGATACCTTCAAG
RM20091961248_2CG	G[C/G]AGCAGAGGTCAACTTAATGGAGTGGATGACAGACCATGATTGAAATCTTATTTATTTTCTCTCAAAATACTTTGTGCGC
RM20091961249_45CG	AGAGACAGGTCAGCAACTACAAGCCAGAGTTTCAGCCAGTGTGT[C/G]TGTTTTTTACCTGCTATCTGGAGATGTAGGTGTAGG
RM20091961250_12AG	AACCAAGGGCT[A/G]TCAAAAACATAATCCTCCCCATAAATAAACAAACACATATAGGGTGCACCTTGACTTGCACTGTCACCT
RM20091961251_53CG	ATTGTTGCCCAACTTGCATCTGATAGTGAGGAACTACATCAGGTACAACATG[C/G]TTACTACTATCCTAACTACTTGAGAGTG
RM20091961252_16AT	AACTAACCCGATATA[A/T]AGTATATGTTGCTGTTCTAGCAGCAGCATGAATGAACAGGGTGTGCTGCTGCTCTTGGAACAGAA
RM20091961253_74AT	GGAGGGAATGTTTGTGTGTTGCGTGCGGTGGGGAATGTTAGTATTTGGTGTTGTTGTAACATGTAGGTCTACT[A/T]ATGTGTG
RM20091961254_67AC	GGAGAGAGAAGCCATGGCCTAGGCCCAGTCATTGCTACTGACAGGCTCACAATGCCAACAAGATCT[A/C]ATAGTTTCCCTTCG
RM20091961255_45CT	GGGTACCACCTGAGGGAGAAGGATGTCTTCCCTGTAACGCACAG[C/T]GTTGAGATTGCCTGCAAATGCGACCATCACCCCTGG
RM20091961256_63AC	GGGTACCACATTAGGGATGTCTTCCCTGTAATGCACAGCGTTGAGATTGCCTGCAATGACAA[A/C]AAGTTCAGTCCGATGATG
RM20091961257_61AG	CGTCCTGACATGACCCTCCAGCATGACAATGCCACCACGCACAGAATGAGCAGTATGGCC[A/G]GTTTTCTGCAAGACAGGAAT
RM20091961258_32AG	TCATGCAGCCCTCCAACTAGAAACCTATTCG[A/G]CCTCAAATTGCGTGCATGGTACGCAAAATGCGTGCAGATTGGCAGGTCT
RM20091961259_39AG	ACTATTAAAGTATCACTGCTTTGGTGTGTAATTCCAAT[A/G]CCCCTTTATCTTTTAAGTATTATTTTTCAGACTTTCATCTCA
RM20091961260_66CT	AAGACAGTCGGACTCTTTAGCTATATACAAAGTTCTGTGAATCCTACACCAAATGAATTCCGATT[C/T]GGGCCCATCTGGCAG
RM20091961261_79AC	TGTGGGCCAGTATTATTTAATTTATGTCAATTGGTGGTGAATACAATTGTTTCACAACTGTCAATGGACATACCTGTA[A/C]GC
RM20091961262_15GT	GGAGCTGAGGGACA[G/T]CATGGAGTCATATACCTTAAACTGCATCTGGCCCGTGCTCTGGGCCACACAGCTCATCCAGATGCC
RM20091961263_78AG	CTGCATCTCCTCCAATGCCGCCACCTGTGCGTTTGGCTGGGGGAACAAAACACACCGGTTACAATAGAAAGAGGACA[A/G]TAT
RM20091961264_30CT	TTGTCTGTTACTGATAGCGGAGACAGCAG[C/T]GGAGAGTCCAGCGACGCCGAGGAGGAGAGTGAAGAGGAGAGCATACACAGC
RM20091961265_77CT	TGACGTTACAAAAATGAAAATAGAGCACAAAGACATTATGTGGTATCACACTTCCTAACACATGGCGAAGCTATAT[C/T]AGCC
RM20091961266_64AG	CAAGTACATTCCTGCAGCAATCTTGCAGAACCAAAAACTGCAGGATTTTGATATTCCTACAGG[A/G]TTTGAGATACAGTATGT
RM20091961267_1AG	[A/G]GAGTGCAGGGGTCAGGAGATAAAGGACTTGCATCAAGAAATGACGTACATTTTAGAAATTGGGCAATGGTCTCAGTCTAC
RM20091961268_51CG	CGTGATTGATATGTCAGCACGTGGTCCTGTGTGACAACAAATGTAGTAGT[C/G]AGAATGGATAACTATTTAACTAAATATCTT
RM20091961270_4GT	GAA[G/T]TCCTAGCCCTGAGAGACAAGGTGAGAGAACATGTACACATGCACACACACACACCCACACGAGAGTGTAGGCTCATA
RM20091961271_5AG	TCTC[A/G]GGACATTTTCCACCTGTGCTGTGGTTGTGGGGACATAAGGTAGACACCCTTCTCAAAGCAGGTGCAACAAATGGTC
RM20091961273_24AC	TTCTTAATGGACATATCCCCATT[A/C]TTTAAATAATCAATAACAGCTTGGTTGCATTTTCAATATTATCCCTCGTAAAAAATA
RM20091961274_79CT	AGTGCTGCATCTAGAACGGTGACACAAACAGCCTTTGTCACGCCGTTCAGGTATGAGAAAATACGATACCTTAACTAG[C/T]GC
RM20091961275_16AG	TGAGATCAGGATGAG[A/G]GCTCTGTCTCAGCACATACTGTAGTACCAGGCTATATCAGACCAAGCTGACTAATGACCAAATCA
RM20091961276_9CT	ATCGGCAA[C/T]GCTACACGCTACATGTATGAGAAGTCCTACATCCGCGGCTGGGGCTTCCAGTACCTGCACAACCACCAGCCC
RM20091961277_32GT	GAGAAATATGGATGTCAAAAATTGTGAAATT[G/T]AATGGTCTTCTTGCCCAAGAAATGAGTCACACCGCATGGCTGTTACTCA
RM20091961279_77AG	GGATTAATTGAGGAGAGAGGGAACGAAGGCCTTTAACTGTCTTCAACAAGACATAATACAAGTGGCAACAACTTGT[A/G]GTGG
RM20091961281_76AT	ACAGCACGTCTCGTGTGAATTCTTATGTGGATTATAATAAATGTGTATTTTATTTTGTCAGGGAAAATCTTTTTT[A/T]AAATG
RM20091961282_32AT	CTTGATCATAAGCTCCTGACACAGTGTCAGA[A/T]GTAGAGCCAGAATGTTCAGAAATTCCATGCACAGAGTGAGTTTTCATCT
RM20091961283_13AG	CAAGTTAAAAAC[A/G]AGCATATTGTATTATCAAACATCAACAAACTTGCTTTGAGAGAAACATTTGCATATTTCACTCAGCCA
RM20091961285_15GT	TCCTCCAGTTTAAA[G/T]ATGCTGTCATCCTCACAGAAGAATTCAACCAGAGCCTGACTGGACATCCTCATCCCCTCCACGTCA
RM20091961286_60AT	GCTGATAAGCTGGCTGCTAACGGGCTGGTCCTGGGGCTGGCTGAGGGTCAATTTCATCC[A/T]TTTCTTCCAAATCACTGTCAG
RM20091961287_41CT	TTCCTATCCTATACAGTATTTTCTGCTGTATTCCCGCAGA[C/T]GTTTTTCATGCGGGATTCCTGTAGGGGAATATTCATTTTT
RM20091961288_81AC	TGATGATGCTGCCTGATGCTCTTTATACAGGCATTCTAATCCACCTTGATCCTACTGGACCATTATCTCCAATCTCTGAC[A/C]
RM20091961289_32AG	TGTTGCATGACATGCCCCTATTGTGTAATCC[A/G]TGGCATGCCATCCGCCCTGAGGGAGGGGCTGGCATTATGAGCCAACCAC
RM20091961290_16AC	GGCTGGAGGCTGAAC[A/C]CCAGCTCCTGGAAGAACACTGGCTGAAGCCATCAGCCTGGCCAGAAAGGCCAGGTCCATGTGGCT
RM20091961291_66AG	AATACTAGATCATATTTACCGATATTGGCAGAACATAATGGGTTGAAGTCGGCTCTAAATGGAAC[A/G]CTACAGTTCTGTTCT
RM20091961292_41AG	TCTGCCAGTAGTGGGGGGTAACTGACCACAGTTGCAGGTC[A/G]GCGTCCTGGGAAACCCATGCTACTGCAGCCTTGAGAACTG
RM20091961293_60CT	GTTAAATGTTGACGAGACAGAGAAGGTGACTTGTCCTCCTTTCACCATCACTGGGTTAC[C/T]GAGGTAGTATGTCACAATATC
RM20091961294_64GT	CTTGCACATCCCAGAAGTGAAACAGCAGCGTCACGCTGCTCCCTGCCTCAAAGGTCATCTGGA[G/T]GAGAAAAGAGCAATTGA
RM20091961295_72CT	GAATTTTATCCACAGTTGATTTTATTTGGTACCCTAACTTTTTTGAACAAACAGATTGTTGGACACAAAGA[C/T]TGTAGAAAC
RM20091961296_51AC	AAGGGAGAGGAGGCGTGTCATGAGTTCTACAGGGGGCTTCAGATCCACGC[A/C]TATAATGTCTATTTCAACCTGCCTACCAGA
RM20091961297_19AG	GGAGACCACATGAGGGAG[A/G]AGGATGTCTTCCCTGTAACGCACAGCGTTGAGATTGCCTGCAATGACAAGCTCATGATGCTG
RM20091961298_72AG	GACAGCGTTGCTGAACCGGTCCGAGTCTGCTGGGCCAGTCATGGCCAGTTTGTACTATAACGACACAGGGC[A/G]AGACCCAGA
RM20091961300_37CT	ATGAGGGTTAGAGTTAGGGTCAGGAACTCTACTGTA[C/T]ATACAGTATCTTATAACTCATCATTCCAAATTGTGAATCAATCT
RM20091961303_63CT	TTGTCTAGTTCCCAGTTTGTTCCAGGGACGTCCCCAAGATAGTTAAGAACTTTGTGTCATGT[C/T]CCCCTTGATTACATGGGA
RM20091961304_43AG	CATCCTGACATGACTCTCCAGCATGACAATGCCACCAGCCAT[A/G]CTGCTCATCCCAAACCATCTCAATTGGGTTGAGGTCGA
RM20091961305_53CT	TGGCTAAATCTGTACTTGATCCACTACAAAGATGATCTCTTAATTAAAATAT[C/T]CTGTGTTTGCTTTCTTTTTTCCTAGATC
RM20091961306_23CT	TGGCATTGCAGGCTTTGTTCTC[C/T]CTGTTGCCCCCAGAGCAGCAACTCATCTGGCCCTGCTGTCAGAGAAGGGAAGAAACCC
RM20091961307_53AG	TGCCCTGACCAGGGGGGTGTCCCTCAGGCTCCGTGTAGTCAAAGGATAGGAC[A/G]CGCTGCTTGGCTTCCTCCGGGGTCATGG
RM20091961309_56CT	GTAGCCACTGTCACACAGGCATCTGTAGGAACCCTGGCTGTTCTCACAGGAGCCG[C/T]CAACACACCTGGTGCCATGCGAGCA
RM20091961310_75AG	GTGAATTCTAAGACACCGGTGTTCATTGTGCTGAGTGTGTTTTTAACTGCACCACCTAGTGCCTAGTGTCACGC[A/G]GTGTCA
RM20091961311_58GT	GTCGTCAGTTGAACAGTGTTTCCGCCGACACTGTCTGGCTTCTGGGTTAAGCAGGCT[G/T]GTGTCAAAAAGTGTGGTTTGGCG
RM20091961313_32AG	GGGGGACAAACCAGCAGAAACACCACTGAAA[A/G]AAATCTAACATACAATACAATACGTACATAGACAGGGGGGAGAGGATTC
RM20091961314_30CT	AGATAAAAGATGTGGTCCACTGTCAGGTA[C/T]GTTACCCATCCACACCTCTCCCTTTATCAACTCCTATGGCTGCTTACTGAT
RM20091961315_30AG	GTCAAGCCCTCGCTGCAGTACGAGTTCGT[A/G]CCCCTTTCGGAACCCTTTGGACCCTCCGTTATTGATGCCCAGCTGCAATGC
RM20091961316_26GT	GTGACCAATTCAAATTCAAGAAATT[G/T]AATTGGCATTTTAGACCAATTCAACTTAGAATCAACCCCAATTGGGGAGCATTGT
RM20091961317_71AG	CACGTCGTGAATACTATCCGTCTCGTCCGCTTCCTCCAGCAGGCTCTGGAAGTGTTGGGAGAAGGAGGAG[A/G]GAGATACGCT
RM20091961318_30GT	GTAATAGAGCCAGTATACTTCTACATCGG[G/T]GTGGTGTTTGGCCTCCAGGCTGTCTACGTCACTGCCCTCTTCGTGTCCAGC
RM20091961319_57CT	AAAGGGCAGGGGATGTTTTTACACCGTGGTTTTGAGTCCCTTATATCAACGTTACA[C/T]ATAGTATATATCAAGAGCTTTTGT
RM20091961320_44AG	TGAAATATGCTTTTCTCTCTTTGTTAACTATGGTGCTATACTC[A/G]GATAATAGCATTGTTTGTTTTAGCCGAAAAGCCTTTT
RM20091961322_71AT	AACGTAAGAGAAGTAGCTCAGAGCGCCACTTTCGTGCATTGCTATACCCACGACTCAATTTAGGTCTGAG[A/T]CAGAGCACCA
RM20091961323_22CG	TCGCATTATGTTGTTTTGCTT[C/G]CCTGGCTGCAACAGTGCCAGGAATAGTTTGTATAGTTTTCCCCAAAATAATCACAAACA
RM20091961324_46GT	AAATCCATCCTCTGTAAGGTCCAATCTCCCAGCCCTACAAGCCAA[G/T]GAAGAGCAGCGGAGGAGAGGAGAGGAATACTTTAT
RM20091961325_21AG	GTCCCCAGAGTGATGTGCAT[A/G]AAGGAGAGCCAAGGTACATGGAACAGAGTGGACTCCTGTATCTCCTATCTCTGTCAGCTA
RM20091961326_35CT	CACGCTGGTCTGGCTGGCCTTACGGGAGATGGGT[C/T]CCCTCCATCGGCCCCCGGCCATCCTGCCCCGGTAGCTGGGCAGGTC
RM20091961327_48GT	GACTGATTTGAGATCATTCTCAGTGATAAGTCCCTCTCTCCCAGCTG[G/T]AGGGGGAAAGCCCATTTGTTGTAGGCCTTTTGG
RM20091961328_21CT	CATCCTGACCCCCCACGATC[C/T]TAGTGTTAAGAGGAGGGGTTCCGCACACTAACAGCGAAAGAGAATGTTGGGTTATTTGGA
RM20091961329_79AC	TCCTGTGGTTGTGTGATGGCTGTGAAGGCTCACTTACCCTTTTAAGAGAATCCCGATGAGCTCGATGGAGAGACAGGA[A/C]CA
RM20091961331_34AG	CATCCTGAAATGACATTCCAGCATGACAATGCC[A/G]CCAGCCATACTGCTCGTTTTGTGCGTGATTTCCTGCAAGACCGGAAT
RM20091961332_41CT	GTTAGAGGAGGTCTCCAAGCCCCCCAAACAGAGGTAGGCA[C/T]ACACACTCATATAGCCTATCTTTGTCCTAGCTTGCGATGC
RM20091961333_56AT	CTGGGGGGATTGAGGCTGGCCTGCCCAGTGACCAATCAGAGAGTGGGAGCTCCAC[A/T]GCAGGCGATGATGACCAGTTGGAGA
RM20091961334_71AG	TGATGTTCGGATGTACCGATCCTGTGCAGGTGTTGTTACATGTACCGATCCTGTGCAGGTGCTGTTACAT[A/G]TGGTCTGCCA
RM20091961335_55CT	TTCCCCAGTTTGGCAATACCTGCATTACATCATAGTCTACTTCAACTCTATGAT[C/T]ATGTTATATAACATTTTCTGAAATGT
RM20091961337_5CT	TGTA[C/T]TGAGGGACGTATCTAGAAGCTGCATTTGCGTGCATTTATTGACATGTCCGCATCTGGTGCTCAGCATTCAGTTTTG
RM20091961339_77AT	CACAACTGGTCTGGACAGCTGCCTTCCTGCGTGTGTGAGTGTCCTTCTCTCGCTCTCTGTTTTTCTCTCTTTGTTT[A/T]TCTC
RM20091961340_54AT	CACAGAGGACGGAGAGGAGAGAGGGAAACACTTAACACGCTGCGGACAGGCAT[A/T]GTCCCTGGAATCATGAATGTAGCGACA
RM20091961341_68AT	AGCTATTGTTCAAACACAATGAAGTGTGAATTTCTCACCACATTATTACATTCAACAGCTGTTCGGA[A/T]GTGACACACAACA
RM20091961343_13CT	CCACAGGGCGCA[C/T]GTGATGCACGTCGGATGAATATCTGTTTACAAGCCACTGAAAGCCGCCACACAAAGGCTGGAGTGACT
RM20091961344_53CT	ATCCTCCACCACCACGCACCCAGGCTTGGAGCGCTGCCGCTTGAACGCCCGC[C/T]TCTCTGCCCTGCTCCTGGGCGGGGGCAG
RM20091961345_63AC	ACAGGGTGACGGGTAGGGTCGACCCACTGGGTTCCACACATCACACCAGATGAGGGGAAGTT[A/C]GTCTTCTAACCAGGGACC
RM20091961346_65CT	CATCCTGACATGACCCTACAGCATGACCCTCCAGCATGACAAGCCATACTACTCTTTCTGTGCA[C/T]GATTTCCTGCAAGACA
RM20091961347_78GT	GACCTGCTGAGGGTGGTGAAGGATGTGAAGGGCTGTTATCCAGAGGACATGGATATCTGCAACCTGTATGGAAAAAT[G/T]TAC
RM20091961348_20AC	CATAGCCTGCCTACTCCCA[A/C]TGGACACTGCAACACTATACCAGAGCGGAAGGAATTAAACTAAGCTGTTTGAGAAATTGAT
RM20091961349_16AT	CTTGGGAGGGAGAAG[A/T]GTGTTAATGTAATCAATATGTGTATGAGGATTTGCCTCGGCAACATTCCCTGCATGTCGCCACTG
RM20091961350_17CT	GATGGTGAATTTTGAT[C/T]TGGGATGGTTCCTAGGATTCATGGCGGAGCTAGCTGAAAGGCCGTTTCCAAACAGAACCACTGG
RM20091961353_78CG	TGGTGAGCAATCCTTGTCCTGAGGGTCACCAGCCTGGTTGTTTTGTTGCTACTATTTTGTGAGAATTTTTGCTTGTT[C/G]TTG
RM20091961354_67CT	CGCAACGAGTGGGCCGTTGCTCAAGGAGAGAGAGGCGGACAACTAGGTAGGTAGACAATTCAAACA[C/T]ATCTTGTACCCTCT
RM20091961355_69CT	ACAGGATACAACTACAGGCACAGTGCTCAACAAACGTCTTTTAACCAAGACACCAATGGTGAAATATA[C/T]GCTGAAACAAAT
RM20091961356_61AT	ACAGTAGCAGCTGTGGAGGTTGTCCAGACGGGGGGAGTAGATGAACTCTTCAAACACACC[A/T]CCAATTGCCTATGCAGCAGA
RM20091961358_21CT	AATCAGGCCCCGGAGCGCAT[C/T]GAGAGCAGTGGCAACAGCCTCTTCCTCGCTTTCAGGAGTGACGCTTCCCTCGGGATGTCT
RM20091961359_38AC	GGTTGTTAGATCTGCAGAAAACACCCGTCTCTCTCTT[A/C]CACAACTCTCAAAGCATCTCCACAGCAACTGTCTCTCAGTACT
RM20091961361_36AC	TATTATTCCTCCCATAGAAATATAATTTACTAGAA[A/C]AGATATCCCCATTTGAGTCAATGCACTGCAATTCTATTTCTATGC
RM20091961362_71CG	AATCTTTTATTGAAGGCAAACCTACATGCACATCGCTAGAGCCCAAACATGCCCTCACTGGCACATCACC[C/G]CCTCAACTTT
RM20091961363_13AC	CTAGTTTTTAAT[A/C]TTTTCTTGATTAATGTCCATTCATATGGTCAAGTACTGCACATAAGGGCCTAGTTAAGCTGGCCCAGA
RM20091961364_50CT	CCAGTGTGGGATTCCCGGCCGGGAGCCTCCAAGAAAACCCATTTCACAA[C/T]ATTCCCACAGTGGTAGCCGCGGGATTATTCT
RM20091961365_31CT	AGTCACATGTTTACCTGTCTCTGATTGGTC[C/T]ACACCGTGGAGGAAAACATCTTTCTGCCTGTCCCTAGTTTATCCCTCTGT
RM20091961367_51AC	GATATATTATTATATGGGGTACCTTGATGTCCGAGGAGTTGATTTTAATT[A/C]ATGTGTATGGTCCCAATGAAGATGACTCTA
RM20091961368_74AT	GGCGCACAATGTATCTAATGTTTTCTGAAATACCATTTGAAAAAACAGATGGCCTAAGAAATCACTTTGAAAT[A/T]AAAAAAA
RM20091961369_5GT	TCCA[G/T]TAATAATGTGCTGCACCGGGGCTTTCAGAGAGATGCGTCCGTGGTCTTGAGTGTGTTATGGGAAGGGGGCCCACGT
RM20091961370_5AG	CAAC[A/G]CCCTATGTGAGCTTATCTGAAAAGCATGGACCATCCCATACCTGTCACAATGAGAGAGACCCCAGCAGGCAGGATG
RM20091961372_21AC	GAGGAGGAGCCGTGATAAAT[A/C]TCAGACAAATATTGTTTTTAAGGCTCTCACTGCACACTTAAGCTCTACACACAGAGACTG
RM20091961373_43CT	AGAGCTGAAAAGGGGGGGAGAAGAGAGTGAATGCATTTTCTT[C/T]AATCAATTATTTTAGAACTAGGGAGCTCCTCTATTGTC
RM20091961374_68AC	GCACTGCAATGCAGGGGTTTAACATAGAAATATGAAGCTAGAGAGCACACGGGCAAAAGGAGTCTGC[A/C]GATTGCTTCTCTC
RM20091961375_17AT	TGTGCTTGGGGAATTC[A/T]GCTGCAGCCAGAATCCACCTGTTCCTCTCCACCGCACATGCAGGGCTTCAGCCCGGCCCCAATA
RM20091961376_48AG	GATATCAGGGGAGGGGACTGTGTGCTGCTGTGTAGGAGGTGAGAGAC[A/G]CTGGGACTGTTTCTGGCCAGGCTTGATTGGCTG
RM20091961377_38AG	AGCGGGTGCATACCTAGCATTTCCCAAAGGATACAAA[A/G]GCCAAGACGTCATTGTCACCTGCGTCTAGCATGATTCTGTTAC
RM20091961378_43AC	AGATCTGGAATTGCAGTTTAAATGTTACCATCACGAGGACCG[A/C]CAGATGAACACCAACTGGCCTGCCTCGGTCCAGGTCAG
RM20091961379_71AG	GCGTACGGAGGAGACCGGGGGGGCTCTTTACTTCTTCCAAACGGTGTAGAAAACCCACCTGAGTCAGCTC[A/G]TTAAGGAAAA
RM20091961380_54AG	GAGGCCCAGCACACCTCTGGTGAGGTGGAGGATCCGGTGAGTGACAGACAGGC[A/G]CTTTCAGATATTCTGCTCCATGTATTG
RM20091961381_58CT	TTGAATTGTGACTCTACTTTGTCTCTATACTGACACTTAGCTTGTTTGATTGCCTTT[C/T]AGAGGGAATAGCTACACTGTTTG
RM20091961382_80CG	AAGTCAATCAAGACTGAGAACTCAATAGTAAGACTGGATGTGACATTTTATTGTGTCATAACAGCTGCCTTTAACAAAG[C/G]A
RM20091961383_73AT	AAAATCGTACAACGAGTCTCCTGTGTTCTGTGGGAAGGAGGGGAACCGATACATCGGTTTAAGCAAAATAGT[A/T]TACATTAA
RM20091961385_4AC	GGA[A/C]ACACAATACAACAATATCAACCACTAAATAAATCATCTCAAAATAATCAACATACGGTCAGGATCGGTTAAGGACAA
RM20091961386_27CG	AGGAAATAAATAATCAATTGTTTTCT[C/G]ATTTCTTTAAGTTGTGGATGTTTCTTAAAGCATACAGCATAGAGGTGACAAAAC
RM20091961387_40AG	GGAGTGCAGCCGCCTTCCTAGGGCCCTGGAACCCACCTG[A/G]GGGTGACAGACTGCCCGGCACCCTGAGGTCCTGGACCTACA
RM20091961388_59AG	GCTACTGTTTCTGTCTACTTCTATCTATCCCTGTCTGTCTGCCTCTATCCAACTTTAT[A/G]CTGGTTCATTCTGAGCTTTTAC
RM20091961390_49CT	CTCGATCTGTCTGAGCAGCGGCCGCGTTGCAGAGGTAACACTCTGACT[C/T]AGCTCTTGGTTCCTGTTCTCCGCCCCCTGCAG
RM20091961391_62AC	AAACTTTGAGCCCAGAGTTTTGCTGGTTAGGTTATTTGGTCAGCATAGCCCACCGGCCCTA[A/C]GTAAAACACACTCTCTGCG
RM20091961393_21GT	GCAGAACCCCTCCTGTTTAT[G/T]TTCACCATACAGTTCACTCCTCATGAGTCTAATGTAATATTTACGTAAATATGAAACAGT
RM20091961394_55AC	GACAGTCTCACTCTCACACACAGACACACACAGGTAACTGATCAGTTGTGTGTA[A/C]GTTTAAATCTTCACTTCCCTCCACCT
RM20091961395_46CG	GTATCTCAGGGTCAGCCTCTCCCCTGCTCTGCTCCAAGAAATACT[C/G]CTTCTCCACGCGCCACACAGCACTGAACCGCACAG
RM20091961396_38AG	CTCAGATCCAGGCCCAAGGAGAAGATTTGGCAGCACC[A/G]CGAGGGCTCTGCCCCGGCCTACAAGACCCAGGCCCCAGACACT
RM20091961397_38AG	AGGGGCTCTATACAGTACTGGTATGGGACTGAGGGGA[A/G]TAGGGATAGAGGATAGTGTAAAGCAGAAGATAAGGAAAATGGG
RM20091961398_24AC	GTGCACTCTGATACCCTGTCTTG[A/C]ATATGACATTACAGTGGTGTAGTCAAAAGAGAGTATGTTAAAGATTATTGCAGTAGC
RM20091961399_58GT	TAGTCTGGCAATTGCCATTCAAAACAGCACTAAATTATACTGGTATCTTATTTGACT[G/T]GCAGCCACAGCAGGACGAGAGAC
RM20091961400_81CT	TCTCCATTTTCTGCTTGACTTCAACCTGCAAAGGTTGAAAGACATTATCTCTCTCTGTCTGTTTCTCTCACACACACACA[C/T]
RM20091961402_73CT	GAAGCCCAGTTTCAGTTGGAATTATTGATATTACCCACTAATACAAGATGTAGGATCTTAATTTGACCTTTA[C/T]TGTCAAAG
RM20091961403_54CT	AAGAAGCTGGATATGGAGGTCTTTGACTGGCGTGATTACACATGGTCTTTGGT[C/T]GTAAGGCCAGTTGAATGTATTGCAAAA
RM20091961404_38CT	TGGATGTCAGTCAGGCTTGTGTGTTTTTCTCCAGTGT[C/T]TCTGCCATGCTACTCTAATTTACATTAACAGTCAAAAGTTTGG
RM20091961405_72CT	GAAGTGAACCCCTCGTTGGACATGGCTGAGTCAGACTTTCAGAACAACGTGATGCGTTGCCGCTGCAAGTA[C/T]GATGGAGGA
RM20091961406_4CT	GAC[C/T]GCGGTTGTCAGTTGAACAGTGTTTCCTACATGCAGCTTCCGGATTACGCGGACGGGTGTTAAAGTGCTCGTTTTGGC
RM20091961407_73CT	CCGGATGTCCTCCTCATCGATGCCGTCGTTCCAGATGTCGTACAGGATGGTCATCTCCTCGAACTCAGAGCG[C/T]GGAGCGAG
RM20091961409_31AG	AGTGAAAAGTCATTAGTAAGTGACTGAAAC[A/G]ACTTCAGGCCCTAAAGCACAGGCAGGCCTGCATTTTAAATGGATGACATC
RM20091961410_50CT	AAAGCAGCTGTGGTTTGTTTCTGGTGAAACTGCTCTGCTTGAAAATGTT[C/T]GCAAAAACTGAAGTCAATATTTTGTTCCCTC
RM20091961411_7AG	CGGATT[A/G]CAGAAAACCTAGTCGATAACTAACGGGAGAGCACTATAGCTATGCTAGGCTATGCTAAGCTAAAGTTAACGCTC
RM20091961412_80AG	TGGGCATTGCTGATGCCGATGAGGCCCCTGGCTGAGGGATGTCCAGTGGGGTCCCGAGGGGGCAGATCTGCAGGAGGAT[A/G]G
RM20091961413_78AC	TGTTTCATATTACCCTTGACCTGACATGCAAATAGCTTGTTAATTCTGACTGGAGTCAAACCCAAATGTACATGCAA[A/C]GAC
RM20091961414_58AG	AAGAACAACCAAGTAGATAACTTTAGAGTCCTACTGCAGGAAAAATACATTAAACTA[A/G]AAGCCAGGAGCCACAGACTGGCA
RM20091961416_42AC	AAACCATCACATTCCTCATATTCGGATGGATCTAGAAAATA[A/C]AAATAAAGAAGAGGAGAAGGAGTGGTGGAGAAAGAGGAG
RM20091961417_71AT	ATCACACTGGACGACGGTAAGACACAGCTCTGTCTGTCAGCCTCTCCATCTCTCTGTGTCTGTACTCACC[A/T]CACTCTCTCT
RM20091961418_36CG	CAGTTAATGGCCCTGGTCAACAAGATGCAGGCCCA[C/G]TTCAAGCCTCTGGCCGATTACTTCCAGGACCAGATGGAGCAGCTC
RM20091961419_57AG	ATTATCCACCTCCCATTGGTCAAATATTCACTGACACAGAGAGCAGAGCATCCCAC[A/G]GTACAACATACTGCCTGTTTCTCG
RM20091961420_16GT	ACACACATGCCAAAT[G/T]AATAACTCAGTTTAACAGTGTGTACACAATCACATTCAATGCTGTGAAACAAGGTTTATCAACAC
RM20091961421_42AC	ACAAAAACAGAGAAATATCAAATCAGCGCAAAACAAAACAC[A/C]TTTCCAGATCAGCCTGCATTCCCCTCATCTGGCTGTTGT
RM20091961422_8AC	TGACTTT[A/C]TCTGTAACCTGTTATAATCATCTTAGTATACGTTTATAACTGTCTACTTTATATATAGGTTAAGAGGATTTCA
RM20091961423_14AC	CATCCTGACATGA[A/C]CCTCCAGCATGGCAATGCCAAGCAGCCATACTGCTCGTTCTGTGCTTGATTTCCTGCAAGACAGGAA
RM20091961424_26CT	TTGCCTGAAAATGTTGGTTTTGAAT[C/T]GCCACGTTCTGGTACGTCTGCCTCGTGATTTGTTGGAGGGAAAAAAAGTGTCACA
RM20091961425_23AC	CTACACAAAATGCAGAAATAAA[A/C]TATAAAACATGCCTTACATAAACATAAACATCACAATTGGTCCTTTTGTTCGATTAAT
RM20091961426_31CT	AAACATTACGAGGCTCTTCAATGCTAAAGG[C/T]TGCTACAAATGTTTGTAGATAAGGCTGGGTAGCCCATAGCCCTGGGAGAG
RM20091961427_77AC	TGTCAACTCCTCCAAACTGTGCTGTGCTCTGCACATGTCCACAAGGTTGAGCGTCAAAAACATCATCAGGTCAAGC[A/C]CACA
RM20091961428_12AG	CATCTGAGAGG[A/G]GGTGGGATGGTGCTGAGGAGAATTTCTGTCTGTAATAAAGCCCTTTTTGGGGGGAAACTAATTCTGATT
RM20091961429_69AT	CAACAGGTGAGGGAGAGAGGACCCCCAAAAACAAAATGACTCAATCCAGAATAAATATTTATTTTAGT[A/T]TAATTATGTAAT
RM20091961430_58AT	TATCTGGAGTGGCTACGGATACATACGGAGTTCTGTATCCCAATTTGCCCAGACTAA[A/T]AATAAGTATATTAGTGCAGGATT
RM20091961432_17GT	GGAAGTCATTTGGTAC[G/T]GTGTACTTAGGCTACAGTATGTTTTGCATGTCTTCACCCTATTCCAAACTGACCTCTGCAGTCA
RM20091961433_68AC	CCAGCTCCATACCCAGAGAGGGGCACAGCCAGGTGGAAACAGACCTGCTCTAGACGTTACAGTTTAG[A/C]CATTTAGCAGGCA
RM20091961435_66CT	GAGGGGAGCCGAATGTTCGTCGCTAAGGGATCCATCCGTGAAAACCACTTCAGGGTAAGAATAAC[C/T]TTTGTCCAGAAAAGT
RM20091961436_5CT	CTGT[C/T]GGCACTACACCTCTCACCCCTTAGGGCAATGAATCAGTCTGTGATCTATGGAAAAGTTAACGCATGAGCATCTCAA
RM20091961437_80CT	GTTGGCCCCCAGGAAGTGCTTCTTTTCCTGGCAGGAGAAAAGGGGGATACAGGATACGTGTCACTAAATGCGTGTCACT[C/T]C
RM20091961438_47GT	GTGTATGTTCCTGTACAGAAGTCAGACTCGTAGCCTGAGTGCCAGT[G/T]TGTTTGTGCCATCATGCCAACTCCTTGTCAATCA
RM20091961439_17AG	ATAAATGGCACTACAC[A/G]TTTCCATCAGCAACAACTTTTGATAAACATTCTGTACAAGAAACAGAGAAAAGTTGGGGCCTGT
RM20091961440_69CT	TTCCTCTGTGGGTCTGGGAGTAAGCCTGACAGAGAGGGGCTGACATCTCGCCTGGCCATGATGCCCTC[C/T]ATCCTCCTGCAG
RM20091961441_19AC	GGAATGGGACTTCACTGC[A/C]AACATCTGGAGTTGTCAGACCTTTCATGAAAACGTAAAGAAACATACAGGATAAAATAATGT
RM20091961442_6AC	ACGTC[A/C]GTCTCTCTGCACCATCCATCACCCCAGACAGATGACCAGACACCGGGGCTCGCCCAACAGACCCCTGGTCTCCAC
RM20091961444_79AT	GGTGGTACGGTTCATGGCCGTCACCGCAGGCTTCCTCAGCGTCTCCACCTTCTTGACGTCGCGGCGGAAGTTGGGAAC[A/T]GA
RM20091961445_61AT	GAAAAGGTTGCCAGTAGTGTCCTAACCTTCAATGTCTAGGACAAGCTACTATATTCTGAG[A/T]AAACACATGAATGGAACTAT
RM20091961446_1CT	[C/T]GAAATATGCTTTCTCTCGTTGTTAACGGAGGTGCTACACTCAGATAATAGCATAATTTGCTTTTGCCGAAAAGCCTTTTT
RM20091961447_43AG	GTGGCCTCTTTACACTACCAGGACCAATGAGGCTAGAACTAG[A/G]GATTCAGGGCAGGGTAGGCTCTAATCCACCACCAACAT
RM20091961448_58GT	AGGGTCCAGCTCCCTGTCAAGAAACAGACAAATAGGTGTTAAGGACATGGCTTGACA[G/T]ATTTCCTTTTCACTCGTCTGAAA
RM20091961449_27AT	GTGACCAATTCTCCATTGTCAGGCAT[A/T]TCTAAAATAATTTAGGGAATAAACAAACTATGAGGACATCATTTTAAAAAGCCA
RM20091961450_47AG	AGGGTGAGGGCTGATGGGTCAGGGGAAACGAACAAAGACAAATAAA[A/G]AACGAAGTAAAGGACATTTAAATAATAAGAGGAA
RM20091961452_35CG	CCGCAGCTCGTTGGTGAGGTCACACTCTGTCCTC[C/G]AGCTCCGGATGCAGTGAGGGTTCCTTTGTCTGTCCTTACCAACCCT
RM20091961453_51CG	AGGTACAGGATGGAAACAACTGCCTGAGTTACACAAGGAAGGCACAAGTC[C/G]TTCATCAGTGCTCAGACTCTCAGCCTATTG
RM20091961454_46AG	GTGTTTGGGGTCACCAAGCAGCCAGCTAACATTCTAGAATTCAGT[A/G]TTCTAGAGCTCATTCCTCGGTCTGAACTCCAAGCA
RM20091961455_5AG	TATT[A/G]GTGTAACTGACTAGTTTACTACTTTATACTCTCATCATGTGTAACTCTATTAAATAATTCAGTTATGATGTCCATG
RM20091961456_61CT	AGTACACCATGCATAGTAGGTCTGGTAAGTCTGATTTACTTTACTTAATATCTAATGAAA[C/T]TGGTAATAGTGGTCAACCCT
RM20091961458_39AG	AATGGAGACGTTATTCTCAAGCCTAATGGAATGAAGCC[A/G]TTATAACTTTGGGGGGGCTAGTTAGTAGCTTAACTCCTGAAA
RM20091961459_74AG	GACAGTAACAATGGTTATAAACACATGAAGTTGTATTGACATGCATACTAATGGCCAGTTTTTGTATGTCAGT[A/G]TGCTTTT
RM20091961460_70GT	GGAGTTGATGAAGGTGATGGGGGACAGGGGAGTGTCTACCTGGACTCCTGCCCCACCGATCACGGCCTC[G/T]GCCGGACAGAC
RM20091961461_15AG	AACACCAAGAGCTG[A/G]TGGGGATTGAGCCACGCCTGTGTGTTCGGTTTCATATTCCCGGCAGGAGGCTTGGTGGCCTGGCCT
RM20091961463_2CT	C[C/T]GGCGTGTATGTATGTGTGTGTGTTTTTGTCAGAGTGTGTATGTCAGAGTCTGATAGAGAGAGGGGGTATGTGGAACAAG
RM20091961464_41GT	TTTACTTAAAAAGTAGTTACTAATATTCACATTTAAAAAT[G/T]TTAAATACAAACTATATAAATGGTTAACGGTATTGATGGT
RM20091961465_33AG	CAATGTACAGCCTCCTTTGTCTGTACAGACAG[A/G]CAAACTAGCCAGTTGAGTTACTTAGACTGCATAGAACGTCGCACATGA
RM20091961466_30CG	TATATCAATTACTTCTATAACAGGTTGTG[C/G]TAGCTCTTTCCTGCAATTAATGACCAAATGTGCCTTATTTGACCTCATGGG
RM20091961467_56AG	GTATGGAAGATGTCAATGAACCAAGAAATATGCACACAGACCTCCGTCTATTCAC[A/G]AATCAGAGATGTTCCAACTGACCAA
RM20091961468_50GT	CAACTCAAAGAGGTCAGTAGCCACAGTTGGTAATGTTAGTCTGTCTGTA[G/T]AATGACAATGGACAAGGAAAGCTCAATGCTG
RM20091961469_24GT	AAGGCTACTACAGCAGCAAACAT[G/T]GTCAATGATTCTCCCTCTACCTGATTTCTAAACCTTTCGGCAGTAACTAGTGGTTTT
RM20091961470_61AG	CATCCTGACATGACACTCCAGCATTACAATGCGACCAGCAATACTGCTCGTTCTGTGGGT[A/G]ATTTCCTGCAAGACAGGAAT
RM20091961471_20GT	AGCTAGGCAACCAACCATC[G/T]TATTTGTTCTGTTCCAAAGTGCTGCGCAGTCTCAATCATGCCCAGTGGGGTTGTAGGAACT
RM20091961472_29CG	ACACACACACATTAAGTTCCATATTGAA[C/G]TTGTGCAGAGCCGTGGTCTAGTGTTAAAGCCCTCTGCTCTAGACACACATAT
RM20091961473_46AT	GTTAGTAACAGTAACTCTAGTCATGTTGTAGTCTACTATATGTAT[A/T]ACTGCTGTCTGTTGTGATTGGTCATAATAATCTAG
RM20091961475_23AG	CAGCTCATACAGCTGGAAGAAC[A/G]TAGAGTCCTGCAGAGGACAAAAGAGGGAAGTCAAATACAACTGCACAGGAAACTGTAG
RM20091961476_74GT	AACAAAATGTAAACCACACTGCACTCCACTGATAGGAATCGCTGTGTAAAGACGTTATGGTTATAAAAGACCA[G/T]GTAGCTC
RM20091961477_63CT	TCTGAGTAATGTTTTCCAGACGGTGTGAGTTTCTCTCTCGGTCTGTCACGCTCTCTCTCGGT[C/T]GCTCGCGCACACACACAC
RM20091961479_29AG	CAGGCTCATGACCCTCCAGCATGACAAT[A/G]CAACCAGCCATACTGCTTGTTCTATGTGTGATTTCCTGCAAGACAGGAATGT
RM20091961481_65AC	GAGGAGGGTCGTTAGTGATTGAAGTCACCTGGGCTCAAAGTATTTAAACTGTCACTAATCACCT[A/C]TCTTTCTCTCTCCGCT
RM20091961482_72AT	CGGGGGACAGTCAATGCGATTCTTCAAGATGCCTGAGTCAGCAGGGAGAGATTAGAAAAAGGAAGGGTCAA[A/T]ATGTATTTT
RM20091961483_4AC	CAT[A/C]CTGACATTACCCTCCAGCATGACGATGCCACCAGCCATACTGCTCGTTCTGTGCATGACATGAATGTCAATGTTCTG
RM20091961484_64AC	AGGAGGACACAGGTCAGGCAGAGCCAATGTCCACTGGAGGAGCTCCGAAGCCAGGCTCCGGGC[A/C]CTTCCTGTTCTCCATCA
RM20091961485_2AT	T[A/T]GGTGGTCCTGCGCCTCTCACTCCTCCCTCCACTCTGCTGCTGGTAGCCTCACCAGGCCCTGCCGGGATCAGATTCTTAC
RM20091961486_19AG	GGGTACCAGATGAGGGAG[A/G]AGGATGTCTTCCCTGTAACTCACAGCGCAGAGATTGCTTGCAATGACAACAAGCTCAGTACA
RM20091961487_54CT	ACACAAAACGCAGAACCTTTGACGAGCTGCTTCTGTTGGCACTCCAATATGTC[C/T]CATAAACATCACAAATGGTCCTTTTGT
RM20091961489_13GT	AATCATGCCCAG[G/T]TGCGCCACATCAGCTCTGCCCTCTAGCCTACTGCAACAAGCAGACTACCAAACAGAAGATCCCAGAAG
RM20091961490_67GT	TGAAATATGGTTTCTCTCTTTGTTTTCGGAGGTGCTATCCTCAGGTAATAGCATCGTTTGCTTTCT[G/T]AAATCTGACATGTT
RM20091961491_47AG	AGGGGCTCTATACAGTACTGCTATGGGACTGAGGGGTAGGGGATAG[A/G]CTATGGTGGAAAGGGAGTAGGGGTAGAGAATGTA
RM20091961494_38AG	ACAGTTCAGCCTGAGTCCAGCTGCTACCAGACAGGGA[A/G]GACCCAGGATGCAATAGATACGTCACACAAGCAGAGTGAGTGA
RM20091961495_24CT	CCAGGAATGGTATCTGGTGCCCT[C/T]CAACCTGCTTTCAGGATATGTAAACTGCATTCTGTGTCTGCATGTGTGTCTGCTGCC
RM20091961496_46AG	GGGGAATGGGATGGAGGGATAAAAAGGGGGAGGAGGAAAGAGAGA[A/G]GGGTGACATGGACAGTCATTACTTTAGTCCCTTCT
RM20091961497_51GT	TCTTGTTAGTGCTTGGCTGTGATTGGATGGAGGAGTGTGGTCCATTTTGC[G/T]AATCTCCCAGAGGGCAAAGCAGTGACCTGT
RM20091961498_47AC	GGGTCCAACCATAACTTCTGCCTCCTGCTCTCCACAGAAACTTCTT[A/C]TTTCACACCAGAGACGGGTGTCTTCATCCTATCC
RM20091961499_15AG	AAGAGGATCTTCCA[A/G]ATTCCATGGATGCATGCTGCAAGGCATGGCTGGGATTTGGAGAAAGACGCTCCTTTATTTATGAAC
RM20091961500_16AG	TGCGGCAGCAGCAGC[A/G]ACTACAGTGACAGTGTCGGCTCTCATTTCCATAAGAAAATCCAGCCAATCCTCTCTCTACCTCCT
RM20091961501_67AC	CCCTGTTTCAACTCAGGAGTCCAGAGGGACATATGTACCAACTACATCTACCTCACTGCGAGGTTA[A/C]GGGTGAGTGAATTG
RM20091961503_71AG	GGGAACAGGAACAGTATGAGGAGGACATTTCACAACATTTTACTGCAAGAGAATGGTGACTGTTAACAAG[A/G]TTACATTATG
RM20091961505_44AG	AGTTCTGAATGATTCATTGCCATATACATTTACCTGGCTAAAA[A/G]GTGAGCCACTTGCGTGGTACCGGTTATCCCGAGTTGA
RM20091961506_33AC	ATTTTCCTCACCAAGGAGAGGTACGTATTCAC[A/C]GAGTGTGTGTGTGAGAGAGCAGTATGGCTTAAAATGATATGGATTTCT
RM20091961508_28AC	ACACTCATGACCTTTGACCCCTAGGGT[A/C]GGCCCTTTGCTCATGACTGACTGGCTGTGAGGGAGGGAGGAATCCGTCCACAT
RM20091961509_6AT	CTTTT[A/T]GGAAGGGAGATATTAAATCTAAACACATTATATAAAAAAATATTCAGGCTTCCAAATGTGCTACCATGTGCAAAT
RM20091961510_69AC	GCTCCTGCATGTCATCTGTAGCCGACACTGTCAACTACTGTTCACCAGCAAGAGTCCTGTGCCCAATC[A/C]ATGATGACTTCT
RM20091961511_35CT	CTGAACATGTGGACTGGCCTTGCCTTTTGAGCTT[C/T]GCACTGGTTTTATCGTGAGCCAAGCTGAGCCAAAGGCCCCAACTGG
RM20091961513_72AG	TCAGGGCTGACACTGGTTCTGTGGGTGAGGCTGAGGAACAGAAGAGAGGCAGCTTGGCCTGATCTTATGTA[A/G]CAGTTTCCT
RM20091961514_41AG	GAGCACTGGTCGCTACGACTACCAACACATGTCTCACACA[A/G]AGACGAACACTTCTTACAGCGCTTCCTGTCGTCGCGGAAA
RM20091961515_70AC	GTGTCTGGCATACGGGGGTGCTGATGTCACCCGCTGTTTCTTCTGGCTCCTGCAGAGGGCAGGCTTCCC[A/C]TACAGGGAGTG
RM20091961516_27AG	CCTCTATCAGTACTGGAGGGCCTCAG[A/G]GCTAGTGCAGCACAGGTAATATACAGTCTTTGTCTATATGTTCACTCATCCTCT
RM20091961517_10CT	TGCAGCTCA[C/T]CTCAGCTCTTTCCCTTTCGCCCTTCATACTACTGGCCCTTCATACTACTGGCCCTTCATACTACTGGCCCT
RM20091961518_66AG	TTACCCTGCACACATTATGTAGTAAATGTTCAATGTCAGTGTCAGGATGCTGCCCTCTGCTGTCC[A/G]TTTGTGGTGTTCACT
RM20091961519_80CT	GGAAAATATGGATGTAAAAAAATTGTGACATTGAATGGCCTTCCTGCCCAAGGAATGAGCCACCAAGCATGGCTGCCAA[C/T]G
RM20091961520_17AT	CCTACTCTATGAGATA[A/T]AACAGTAGAGAAAGCCCTGTGTCCCTGCACGCACGTATGAGACATAACAGTAGAGAAAGCCCTG
RM20091961521_10AG	GGGTACCAC[A/G]TGTGGGGGAGCGTTGAGATTGCCTGCAATGACAAGCTCAGTCCGATGATGCTGTGACACACCGCCCCAGAC
RM20091961522_42AT	CAGCACATGTTGGAGAACCTGAGCAGACCTTACACCTGGGG[A/T]GGGACAGGGAGACGGTACCGCCCAGACCTCCTCCTGACC
RM20091961523_38AT	GGCACAGTTAATCCATGTGGTGTAATTGACAAGTACA[A/T]TGGCTGTAGGCTGACCAGAGTCTAAACCTACTGTGATTTAACT
RM20091961524_28AC	AAAAATAGCCCAGGCAGTGGAGGAGAG[A/C]GGGAGGAGGAGGGAGGATAAGGAGGGAGGGCTCAGCGCTCTTTCTTCTTTTTT
RM20091961525_51AC	TAGACCGCTGGGAGAAGAGAGGAGGATGAGTTTAGAGAGGAGAGATATAG[A/C]GATAAAGACAGACAGTCCTATGAAGAGTAG
RM20091961526_61AG	TCCCCAGTGAGGGCTGAGCAGGGACGGTAGAGACACCCCACTACCTAATTTTATCTGATC[A/G]AGGCTGGGCCACTCTGGTCT
RM20091961527_57AG	GGGTAACACGAGGGAGGAGAATGTCTTCCCTGCAATGACAACAAGCCTTGTCCGAT[A/G]ATGCTGTGACACACCGCCCCAGAC
RM20091961528_1AG	[A/G]ATGCACTCCTGCTGGATTTCTTAAAACACTACTGACAGGAGATGAAATGCACCTGCGAAAACCCCCACAAGGATGAACCA
RM20091961531_27CT	TGTGGAGAGAAAGCAGCACCATGTAG[C/T]CAGCCTGCTGGTCTGTTGAGAGAAAGCAGCACCATGTAGTCAGCTGGTCTGTGG
RM20091961532_9CT	CAGCGCTC[C/T]GTTCCATTGGTTAGACAGGGACAGAGGAACACTTTCCCCCCCTTGTGGGAACAACCTCACCTGGCTGCACCT
RM20091961533_67AT	GCAAAGTAACTGTGGCAATTGTACTCTGCTGGGGGGATAAAACTGTGTTAAGTGGCTACAGATTTG[A/T]GAGAGAATGGTCAT
RM20091961534_17CT	TCGGCATTAAGAGTTG[C/T]CCTATGGCCCAGGGCAAGTGACCTGAGCAGTCATGCAAATTCAGAATGCTCGGAGCTTAACACA
RM20091961536_28CT	TAGCATTGCTGACAGTTAATTTTCTTA[C/T]ATTTGACACCCAGCTCACGGAAAGTCACAGTCATTCTCCCACCCAGGTTCCTC
RM20091961537_37AC	GTCATCAGGTCCCGTGGTGGAGAGTGAGGGGAGTAG[A/C]GCACAGGCCAATCTGGCAGTGACTTCAGTGTACAGTGAAGGTCC
RM20091961538_54AC	GGGAAGGAGAGATTGTTTACTGGATGTAGCTACATTAGATGATACCATATCTA[A/C]TTTAGAATATGATCAACATGGATATAT
RM20091961539_74GT	ATAGACACCTCACTGCTAGGAGAACACTGGACCGGATCTGAAATGATGTCATGAGAAAGTACCTTTTTAGCAT[G/T]TTCTTTG
RM20091961541_79GT	CATCCTGACATGACCCTCCAGCATGACAATGCTCGTTCTGTGTGTGATTTCCTGCAAGACAGGAGTGGAACAGTCAGT[G/T]TT
RM20091961542_3CT	GT[C/T]AAGGTGGGTAACCTCACATCAACACTCAGGCAGTGGACTTGGGGAACTATGGTTCTACAAACTGGTTTGATGTTTGGT
RM20091961544_22AG	AACCTTAACCAGGAAGTAGAC[A/G]ACTTGACTAGAGGTCACCTTGGGGACAGGAACAGCCATGGCACCTCATAGGGGTCAGGC
RM20091961545_80AG	CTGGCGAACAGTACAAGCTCCCACCACCATACACATACTACATCACTGTATGTTGAGGAGCCTCTCTGGAGGTTTGATG[A/G]C
RM20091961546_35GT	TTTGCTCATGACTATTACATACTTTGCTAAGAAA[G/T]GTATTATTATATTGTGGGTCTCTAATACCCCTCCTACATTTAAAAT
RM20091961549_41CT	CTCCAAAAACGCTGGTTGCCTGTAGAATGACGGAATCCCT[C/T]CAGGCCCGATTAATCCCATCCCAACTCCTACACCAGCGGG
RM20091961553_23AG	TGCAAAACACTTTTACGTATCC[A/G]ATGGTTTTTCTTGTTCCAGATAAAAGCAGATATCAATTCACATATGGAATAAATAAAA
RM20091961554_77AC	CATCCTGAAATGACCCTCCAGCATGACAATGCCACCAGCCAATACTGCTCATTCTGTGAGTGATTCCCTACAAGAC[A/C]GGAA
RM20091961555_65CT	TGAGCGACTCCGTGGCTTGTAAAGGGGGTGATTGTGCCAAACGCCTGCTGTGTACCGGAGAAAA[C/T]TGACAGGCGGGGGCCA
RM20091961556_6CT	GAGCA[C/T]CCATACCAGTTCCTGCTCCGCTATGCCAAGCAGCTCAAAGGTACACGGATGCATATGCTTGATTAGTGTTGCAAA
RM20091961557_59AG	CGCCCTAGCTACGACCAGCAGATTGGCCTGTACGACGCTTTGATCCAAAATGGCCTCC[A/G]GGTTGTCCTGGTGGAGATAGAT
RM20091961558_43CT	AAGATAGAGATGGCCAGGAAGCTGTCAGAGGTTGAGGTGAGA[C/T]TGGCCTATCTGTTCAATCCAACTCATTTTCTAACAGTT
RM20091961559_60AG	TTTGCTCCAACCCTAATCGAGCACACTAATCAGTTGCTCACCAGGACCTTTTGAGGACC[A/G]GTATCCAAACCAGCTGTGTTA
RM20091961560_74AC	AATCTCCTGCATTAGGAGGTAATAGAGCGTCAAATTTAAATGTGTGTGGCGGATCCATCTCGGCCTGCGGTGA[A/C]ATTTATT
RM20091961561_20GT	GGTTTCCATATGAGCTGAC[G/T]GAAGGTGACATCGTCTGTGTCTTCTCTCAGTGAGTCCCATACATACACCCCTTCCTCCAAT
RM20091961562_6AG	TCCAA[A/G]GTGCAGAGGTGCTGGGAACATATTGCCCCCGGGTCCTACTTTACTGGAGTCGGCTCTGTTGGTTTCAGCTCTCTA
RM20091961563_66CT	ATTGCTACTCAGGTCCAACTCTCTCAGGTGTGAGGAGTTCGAGCTGAGAGCTGAAGCCAATGCAT[C/T]ACAACATCTCTCTGT
RM20091961564_75CT	CCAGGTTCACAGGTGTGACTAATGTGACTGTGGGGGAGCTGCAGGCGGTGGTTGTGGCGAGCCTGTAGAAACAA[C/T]TTGAGC
RM20091961565_59AG	AAACAGAGAACAAACAAGCCCTTCACTAGGGCCTCTCCACTACCATAGACCTTCACTA[A/G]GGCCTCTCCACTACCATAGCCC
RM20091961566_19AG	GCATTTCAATGGTGTCAT[A/G]TTTTCTTTTCAGGCTGTAAAACATCTCAAATGACAACTGGAGACATTTTAAGGTAACCAAAG
RM20091961567_55CG	AATGCATACCCTGTCTGTGACTCACAGCCCACTTGGATCTTCTTTGAAGAGGTA[C/G]GGCAGGAGAGAAATGGCTGCTGTGAT
RM20091961568_45AT	CGGGATAGACAGAGACAGGTAAGTGGAGAGAGCTTGGGTCCTCT[A/T]CTCACCTTCGTCATGCTTTAGTCGTCAGTCTCCTAT
RM20091961569_2CT	C[C/T]CCAGCCTTTTCTGTACCTGACACACTCTGTTCCCCATCTCCTCCTCTCGACTCTTGACGGGAAGAAAAAGGAAAATCAC
RM20091961570_72CT	ATAGGAGTACAGCTGTCCCGATATAAGGGGATGCTTCCCCACAATCAGCCTCCAGGAAAAAAATATTCCAG[C/T]GAGACTGGG
RM20091961571_15CT	ACCTACACCCGTCT[C/T]AATGCGCTCGATCACCGAGCCCGTTATAACAATTCATTTAAAGCCTGATTGCCGCATTCCATCCAT
RM20091961572_62AG	ATTCGTGCCAGTCCTAGCCCCTCCAGAGGGCAGCCTCTGGGCCAGACAGAGGGTGAGGGGA[A/G]CGATATGGGGGGGTCCAGG
RM20091961573_32AG	CACTGCCATGCCAGCCACTTTCCCAGAGGTA[A/G]TTTACTGCCCCACTCCACTTGCCAGGCTGTCATTGAAACTAATATTTTG
RM20091961574_1CT	[C/T]TTCATGTCTTTCTCCAGGTTCAGTCTCTCAGACGTCTCGGTCTCCAGCAGCTGGGAAGCCGACTCTCCGGCGTTCCTCTC
RM20091961575_65CT	TTTAACCTCAAATACAGTGTGAAGTCTGGTTAGCCAATTATTACAGGTCTGTGAAACTGAATAG[C/T]TAAGCAGCCTGTAATT
RM20091961576_65AT	ACCAGTGTGGACAGGTAATCACACCTGACCCCAGTCACACTAACTCACAGAAATAAAGCACTGT[A/T]TTCTGAGGGTTATTGT
RM20091961577_17GT	GACAGGAGGTGTGGAG[G/T]GTCTTAGCCCTTAACACCATCAGCTCCTATATCAAAGGCCCAAAAGGTTTGGAAACCAAATTAC
RM20091961578_40CT	AGACAGGCCCAACCAGTGATCAGCATCATGAGGCTCTGC[C/T]CTGCCTGCCATCAGACGCAGACTGAATGAACAACAGCCTGG
RM20091961579_80CT	GTTTCTTCTTATTGGTTTTCTTTAGTAGTGGTTTCTTTGCAGCAATTCGACCATGAAGGCCTGATTTATGCAGTCTCCT[C/T]T
RM20091961580_69GT	AGGAGGTAACGTTAGCTAACGTTAGTTTCAACAAGCTAAACGTGGCAAATACAACACACCACACAACA[G/T]AATTGTAAACGA
RM20091961581_46AC	TCTAAACTGCCATGTTACATTTGATATGAAATTAGACGTTTCAAT[A/C]ATTTGGTTCTGTTCTCTGTCTGTCTCTCTCTCTGT
RM20091961583_49CG	GATAAATATGGATGTCAAAATTATTCTTGCCCAAGGAATGAGACACCC[C/G]AAAAGGCTGCCAATGTGATAAGGATGCAACCA
RM20091961585_69CG	TAGTTCATTATTGTTACATTATTCTGTACCGTTCTGTGCCAGTTATTTATTTAACAAAAAAATATTCA[C/G]CCACAAAATGTA
RM20091961587_14AG	AACAGCATCTATT[A/G]TAATTATGTTGTGATTTTATTTTCAGTCACCCCTCTAGCATGTTGTTAGGAAGGATAAATAAGATGG
RM20091961588_71CG	AGGTAAAGGATGGCAACAACAACTGCCCGAGTTACACCAGGAGCGTACAATCCCTCCATCGGGGATGTTC[C/G]CAATAGGCTG
RM20091961589_32AC	GCGCCCTGGCAACGCCCGCCGGAACAGCTGG[A/C]CCAACCACCCCCAAGAAGGGACCCCCCAAGTTCAAGCAGAGGCAAACCC
RM20091961590_6AG	TCTCA[A/G]GGGTCTGAGCTGAGGGTGTTTTTAGGGTGAGCCTTTGTAGTAATCAGTGTTCACATGACTGTAGTGTGATGTAAG
RM20091961591_77AG	GGAGCGTGTGGAGGACAGGTCAAAGACACCCTGCTCACAGAACACATCTATGTTGTCCACCCTCAGGGCCCCCGCT[A/G]ACAT
RM20091961593_11CT	CCACAAAGCC[C/T]TTGGCCCCTTCAGTTCCTGGACGCCCTGTGGTACCCTAGGTAACAGAGAAATATCATTAATCATCACAAA
RM20091961594_69CT	CAGCAGGGTCAGCTCCAGGTACCAGGCAGAACCATTAGCGGATATCCATACAGCAGTAAGAAAAACAG[C/T]ATGTTATCTTGG
RM20091961595_35AG	ACCACATGAGGGAAGAGGATGTCTTCCCTGTAAC[A/G]CACAGCGTTGAGATTGCCTGCAATGACAACAAGCTCAGTCCGATGA
RM20091961597_61AC	TCTGTAACGTTGCACAACATTGAACAATGGCCTGGTGTCATATGTCACAGCAAGGCCATA[A/C]GTGCAGCCTGCTGAGTCTTT
RM20091961598_41CT	CTGCTGTGGTTCTGCGTTGTGAGCAACTTCCCCTGTCGCC[C/T]CAACCTCCCCTCACTTCCTTTATATTACGGCAGAGAAATA
RM20091961599_47AC	TATTTCCCTCTTTTAGTTCTGCGGGGGGCTTTTTCTTATTCCTTCT[A/C]CGCAAAGGTGCTTCTCTTTGGGGGTTGCTTGACG
RM20091961600_49CT	CATCCTGACATGACCCTCAAGCATGACTATGCCACCAGCCATACTGCT[C/T]GTTCTGTGTGTGATTTCCTGGAATGTTAGTGT
RM20091961601_18AC	GGAATGCAGGAACAGTT[A/C]AATAATGAAGAAATGACCTAAAACAATAATCACATGCATAAAAATCTGTCTTCCCAGTGCAAT
RM20091961602_67CT	GGGTACCACATGAGGGAGGGATGTCTTCCCTGTAACACACAGCATTGAGATTGCCTGCAATGACAA[C/T]AAGCTTAGTCAGAT
RM20091961604_2AC	G[A/C]CACCATTGGGAGGCATGAGGAGCTACTACAGGACCTTCTGGAAGGGCTCCCTTCCCTGACGGAACGCCACGACCAAGGG
RM20091961605_57AT	TCAAACTATGTCATAATCTCTCAGCCACAGAACAGAGACAGTATTATGAGAGACCA[A/T]CATGACGACGCATGTATCCTCTTC
RM20091961606_22AG	TTACACCCGAGTCACGTGAAT[A/G]TTAGGATGTGCTGAAGTGTTGTACCACATTATAAAACATTCTGAAGATTGTGAATGCTT
RM20091961607_30CT	ACTCTCTTGCTTCCCTGTAGCTAACCAGC[C/T]ACCGCCAGCCTTCTAATTAGATACCCTTTGCCTGGTTAAGAAACACAAGCT
RM20091961608_33AC	TCTTCGGGGACCTGTTGTCTCTGGTGGGTCAC[A/C]GTTTCTCCATGGTGGACATGGTGTTGTTACTCCACGGTAATGCCCAGC
RM20091961609_34CT	AGGTACAGGATGGCAACAACTGCCGAGTTACAC[C/T]AGGAACGCACAATCTCTCCATCAGTGCTCAGACTGTCCACAATAGGC
RM20091961610_36AG	GTTTGTCTGTTGTGCATGAGTGTGGTGAAACAGTT[A/G]CAGGTAAGGTTCTGACAGATGGGTGTCTTGGTGGTGGCAAGAACA
RM20091961612_73AG	TGAACACGCACACAGAGAAACTATTGAAAAGGGAGTACTAATGTACATGAAGATAATATTATCTAGAATGAA[A/G]CCTCTACC
RM20091961613_81AT	GATGTTTGCCCTGTGAAGCAGAAGCAGAAAGCCAGTATTGGGTTAGTTCCTGCCTTGCCGAGTTCCATTAGCACCCATAG[A/T]
RM20091961616_70GT	TGTGCTACTTCTAATACACCAATCTTGCTCTATTTCTGCCCGCTTTTTATAGCCTCGAAATACAGCAGA[G/T]GTGTTCCTTTA
RM20091961619_34CG	GCAGCAATCAGCAGAGAGGTTGGGTGAACTCAC[C/G]ACACAGGTTGGGTGAACTCACTACACAGGTTGGGTGAACTCACTACA
RM20091961620_47AG	ATGACCCAGATCAACAGGCAGACCCAGAGACAACGCAGGATACAGC[A/G]GAGGTCCGACGTGGCCTACCCACTAGTGTCAGGA
RM20091961621_24AG	TGAAATGGTTTCTCTTTGTTTAC[A/G]GAGGTGCTATCCTCAGATAATAGCATTGTTTGCTTTCGCCGAAAAGCCATTTTGAAA
RM20091961622_66AG	GGAAAAGTGCACTGTCACAGCCGGGCTACAGGAGGAAGCTCTTTCTTCTACAGTTGACCTGTGGT[A/G]TTTTGATCGGTTGTA
RM20091961623_8CT	CCTGGAA[C/T]GCCACAAAGACTCGCTAGAGCACGATGAGCCAAGTAAACCCTCCCCCACCCGGCCAAACCCTCCCCTTACCCG
RM20091961624_68CT	CCGTGTGTTTGTGGGTTTACAGAGTGTGTGTTTGTACAGGTGCGAGCAGCTCTCTCCATTGTCTTTA[C/T]GTGCTTGTGTTGG
RM20091961625_21AG	AAAGTCTCCGGGGCGCAGCA[A/G]AAGAGGGTTGAGTGAGGCCAGCTGGATCACGGTCCTGTCGCGGAGGCATAGGGGCCAGCC
RM20091961626_66CT	ATGACCACCGCTCTTGAGGAAAAGGTTGAATCGCTTACCTCCAAACTAGCTGATTTGGAGGGCCA[C/T]GGCAGGAGATCAAAC
RM20091961627_64AG	TGACAGCGGTTGCTTCATGGTTTACGATCGTAACAACTACATGGGAAACCAGTACTTCATGAG[A/G]AGAGGCGAGTACCCTGA
RM20091961628_64AG	CCTCTCTGTTTGAACATTTTTGGTTATGTCACCACCACATGTACCCAAACCACTGTGGGGGAG[A/G]CAAAATGGCTGTCTGAA
RM20091961629_33CG	CTGATCGTCTTGACCCCTGCTTTTTAAAACTG[C/G]TGGCTGATTTCATAGTTGAACCATTTAGATATCTGTTCAATCTAACCC
RM20091961630_73AC	CATCTGTCACCATCTGATCCTGCTAAGACATGATGAGCATAGTGTTGTGTACTGACTGTGCACCGTGAAAGT[A/C]TAGCCCGT
RM20091961631_23CT	CCCTCCGTCCGGTGTCTCTGCC[C/T]GCTCGTACAGGCTGACGAGTGTCAGGAAGGACCAATCGGACAGGATGGGGGGGCCGGA
RM20091961632_42CT	ACAATGCCAGTGTCTTCCAAGGCCCTACTTGGGTCTCTCTC[C/T]CACACTAGCAGATATATAATTCTACATGTAAACTGTGGC
RM20091961634_14AG	ATTCACAGGGGAA[A/G]CCATCGCCGGTATCAGCACACCCCCCCGGCACCGCGCACGGAGCCGACAGACACGCGTCAATGTCCT
RM20091961635_49GT	TAGAGGCACATCTTGTTAATGAAGTCTCTGTTCCCGAAGATTTAAAAT[G/T]TATTTTGAGGTATTGAATAGCTATGTTACATT
RM20091961636_37GT	GCTGGGGCTCGGGGCCAGAGCAGGGCGCAGGAGGGG[G/T]GCCCCAGCTTCCGAGTCAGGCGGCTCAATAATCGGATCCCCCCG
RM20091961637_58CG	ATTAATTGTCCATTATTTAACATTACAAATTACAGTTGAGGCACAGCGGAGAGAGCT[C/G]CGAGATGGAGAGATTTGACAAAT
RM20091961638_45CT	AGGTTCTTGATCAGCTCTTGTGGTGATCACTGGGAACTGAGCCT[C/T]CCCTGTAGGATTCTCTGGGCACCCCTAGTATCCCTG
RM20091961639_3AT	TC[A/T]GGGTAAAACACAGCAATTTGTTGGCACTGCTGATTGCTGTCAATGCTCATCTGTATTCAGTCCTAGCCAACATTCTGC
RM20091961640_4GT	GGT[G/T]CCCTGAAGCGCTGGCTCTTTTTAACATGGGAGCCGATGCGAATGTTCAAGGCCCGCAGGATCCGTGAGTATGTGAAC
RM20091961641_38AC	TGGGGAACTGGTGGGTTTTGTTCCACACCGGCACGAA[A/C]GCATATCTAGTATTGATCAAGTATCAGTTGATCAATTATCAGA
RM20091961642_61CT	TATCATGATATGAGAATCATACACTGTCATTTATAATAACATCTTACATTAATTATATCA[C/T]ATCATCATCCATCATACAGT
RM20091961643_7CT	CAAAGG[C/T]TTTATAAAGGACTGTCCAAGTGGTCAGCTGGATGCGGTGGGCTTTCAGAACATCTACAAGCAGTTCTTCCCTTT
RM20091961644_33AG	TTATAATCCTCTATATAATCATCTGTAGAAAT[A/G]TGCAGTCTGCGGCACTGAAAGCCTAAAGAGTAAAATATGTATGGCTTG
RM20091961645_27AC	GCCAACACCGCTCGCATCCAAGCACG[A/C]CAGGAATATTGTCATGGCTGAGGTGTTTCTCTTTTTCACACACACACTAAAATG
RM20091961646_50GT	GGGTACCACATGAGGGAGGAGGATTTCTTCCACGTGGTTGAGATTGCCT[G/T]CAATGACAACAAGCTCAGTCCGATGCTGTGA
RM20091961647_15AG	GAGAAACCCCCACT[A/G]CCCCCGCCTGAGTACCCCAACATGACCAGTCCAGAGACCACCCCCCTGAACCAGGACCTTCTGGGG
RM20091961648_58GT	TGAAATATGCTACCCTCTTTGTTGTCATTGTGCTATCGTCAGATAATATCTCCTTAT[G/T]CTTTCGCCGAAAAGCTTTTTAAA
RM20091961649_7GT	ATAGCT[G/T]CTGGGACCCACCCCTTCTCTAAGGTAGGCATGTATTATTTACAGGTCTCTCATGGTCGGCCACTAAGTGCTGTC
RM20091961650_48CG	AGACCTACGTTCCGGCGTCCGTCAGGCCCCAACTAATGCAGTGGTGC[C/G]ATACCTCGCTGACTACTGGCCATCCCGCAATCA
RM20091961651_56AT	AAATCTGCCCCACAAGTCAATTTAATGTGGCCTGCCAAGGATGTGTATCCACCTG[A/T]CATTGAGTCAGTGATTCTATCAGGG
RM20091961652_23GT	AAATTTGGCCCGTGGGCCGCCA[G/T]TTGGGGAACCCTGCCCTATACCGTTTCTATGATTTCCCCATTTGGGTGACCCTATATT
RM20091961653_77AT	AGCCTCCTCTGCAGCCCTTAATGTGGTTGTAATGAACAAGGCAACAAAACCACTGGATTTGCAGTTTTAAGCTGGC[A/T]ATCA
RM20091961654_18CT	TATTAAAGATCCATTAC[C/T]GGACAAGACACAAACACTTGTCACTTTAAGTTTATTATTATCCTAAATATAAAATAAACATGA
RM20091961655_54CT	TTCTTCTGTGGGTGGGGCAAAGCCTGCATGGTCGTCAACATCAACCAGTGTGC[C/T]TCCATGTACGACGAGACGATCAACGTG
RM20091961656_81AC	TGATGTTCGGATGTACCGATCTTGTGCAGGTGTTGTTACACATGGATTGCCATGCGAGAACGATCAGCTGTCCATCCTGT[A/C]
RM20091961659_12AG	CTCGCTGGCCC[A/G]GTCATTACTCCCTCGCCTCAGGCTCCCCAGGAAGTCTCAGATTTCCCTCACAGAGAACCTTGCGGCGCC
RM20091961660_39GT	TATCTGTAATGAGCTGACATCCCACTTTGAACTGCAAG[G/T]GAATATGAAATACACTGTAGTGTACGCTCTTAGAAAAAAAGG
RM20091961661_27CG	CTGGATATGTTTGGCAGCCTGTTAGA[C/G]CGCCCCCTCGTGGCAGCGGATGCTCTGGACAGATATCCTCTCCTTATCAGCCTG
RM20091961662_31CT	ATGCAGCTGTAGACGTAATGTACATGTAAA[C/T]GTTGTCAGCATATAAATCTCTACAGAAATCCAATGGTGTAATAAACAACA
RM20091961666_48CT	GCGTTTGCGGTCCCTCATGGCACTCTCTTTGGCCTCCCTCAGGGCTG[C/T]TTCCAAGGCCTTGACTCTCTCAGCCGTAGCCCG
RM20091961667_18AC	GCCCCTGCTCCACACTG[A/C]CCCCCGGAGGGGCCCCCGGGAATCATGCCTCCGGAGACTGCGCCTATGGTTCCATCACCAGCC
RM20091961668_8AG	CAACAGC[A/G]TCCTCAGACTGAGGTTGGACCACTTTGCTACAGAGTGCAGCTGGGACCACCTGTATGTGTACGATGGGGACTC
RM20091961670_5GT	CCAT[G/T]ACTACTACTAGTATGCGCGTCTACTTGCCTTTAACCAAAGCCAAAGTGTCAAATCACTACAGCACTGAAGTTCTCA
RM20091961671_58GT	TCCTCACAGTGCTGTACTGTCCCTGGTGTTGGAGAGGGTTCTGGTGGCAGGGGCAGG[G/T]GACAGGTTTTACCATCATGCTGT
RM20091961672_62CT	GTTAAGCTGTATAATGCTCTGATTGTGTTCCTGTATGGACCTGGAGCCTCATTCCTATCCT[C/T]TAGTGTCAGCTCTCCCCTC
RM20091961673_57CT	CTGGTTGGCAAAGTGTGCTGCTGCAGCAGCTGCTCCTAGGCCCTGCTGTCCTACTG[C/T]AGCCGTGGAAGAGGATACGCCTGT
RM20091961674_30GT	TGGCAGAGAACCTCCTGAAGCTCAGAGAA[G/T]AATTTTGGAGGGGGGCCAAGTCTCATTAAAACAACTGCCATTGCCAAGCTC
RM20091961675_54GT	CTCTCTCTCCCACACAATGAAAGGGAATTGAAAAATCCCTTCGTTACAACAGA[G/T]AGATTTTGTAGTACTGTGACATCAAAA
RM20091961676_66AC	CCAGTAGTAATCAAAGACTATGCTCAGCTAGAAGCTGCTCTCACTTAGTTAGGACTGTTGGGGGT[A/C]ATGCAGAAACAGTTG
RM20091961677_14AG	TAAAATAAAGCAT[A/G]GCTTTTGTGGGTTGTGTGTTTGCTTGGCTGGGGGAGTATATGGAGTCTGAGTGTGTGAGGTGTGTGT
RM20091961678_32AG	CAGAAATAAAAATATAAATCATACCTTTGAC[A/G]AGCTTCTGTTGGCACTCCAATATGTCCCATAAACATCACAAATGGTCCT
RM20091961679_55CT	GGCGCTCTTGGCCTGGGCCTCGGTTACCGCCTGCTGAGACCCTGACGACTCCAC[C/T]TCCACTATCTCAGTCACATACTGGAC
RM20091961680_13AG	TTGAGTCATAGA[A/G]CCCTGTTGTTAGCCCAGCATGGATTGAGCCCCTGGCAGAGGAAGAGCTAATTAAACACACCACAGTGG
RM20091961681_40AG	TGTAGTGGTGTGAAATGTAAACAGATACATAGTTTGGTG[A/G]CTTCCTCTCGGGTGCTGCGGGTTTTTAATGCATTCCACAGA
RM20091961682_20CT	GAAGCCATGGCCGTCTATG[C/T]CTGCCTCCTAGGGCTACTCAACCACTTGAGATGTATAAACCAGCCCCATGACCTCGTCCTT
RM20091961683_41AG	GCCTTTTGCCTTTTTGTATGCCGTCATTGTAAATAAGTTA[A/G]TAACTGACTTGACTATTAAATTAAACACTTATCCATATAT
RM20091961685_23CT	TGTCACCATGGCATCCTCCAGC[C/T]TCCTTTCCCCGCCGCTCCCCTCGACACGCGACCCCGTGGGGACAGCGTCGATCAGCGA
RM20091961687_79CT	GCTATTACTTGAGTGCATATATCAAAGTAGTGATTTTAAAGTGTTGTAGTCCATATGTTACTATTGTCTGACTTTGCA[C/T]CA
RM20091961688_47AT	AGTTCAACCTGCCTGAGTGACAAACACCTCAACATCCTCTCAATCT[A/T]ACCTTAAACAGACCGATCACATGCATATCCTTTA
RM20091961690_22AG	TTACGGGCATAGGTAACACAC[A/G]TAGGTAGGTAAGATGTGTACAAATACAACACTAAACTGTGGAGAAGTAAGTTAGCCTCC
RM20091961691_12AG	AACGTGGTCAC[A/G]TTCTGGTCCTCACACCTCTGGCACAGAGTGGTCCATGGCTGATCGCAGGAGACCGCTGGACATTCTAAC
RM20091961692_71GT	GAGGGCTGAGGAGGGCTGTGGAGGCCTGCGGGCGGAGGGTTTAGGAGGGCTGTGGAGGCCTGCGGGCAGA[G/T]GGCTGAAGAG
RM20091961693_73GT	GCAGCAGCAAGGCAAAGAGTAAGACTGGTCTGGGGCAACAGTACAGGGTTAGGGGTCAACTCCATTTCAAAT[G/T]AGATTTTC
RM20091961694_22AG	TGGCCTGAAGAGAAAGGACAT[A/G]CACCCTTGGAAGTAGCCATGTATTTTCACAACAGAAATGAGCTGAGTGTGCAAAATTGA
RM20091961695_43AG	CCTGTGACCCAGAAACACAGGCAATGGGGGGAACCCACCACC[A/G]GAGGCAGTGCAGAGGAGAGAGTACAACACAGCGGAGGA
RM20091961696_52AC	TGAAGTATTATTTATCTCTTTGTTTACTGTTGTGCTATCATCAGATAATAT[A/C]ATTTGAAATCTGACATGTTGGCTGTATTC
RM20091961698_59AG	TACTCCAGTACTATTTGAGAAGGTCCGGTCACACATATTTCCTAGGTGGCAAAGGTCC[A/G]GATTGATATTGTCATTTATCGA
RM20091961699_2AG	C[A/G]ACCACAGGTGCCAGCTCAGACGGTAGTCAAGACGATCCCACGTCACCGCCAGGGGGTCCAACAACTGCTGCAGGCTGTA
RM20091961700_23AC	GAGGCAGTGTTCAGCAAAAAAA[A/C]AAATTGACTATATGATTTACCCCTAATTGCTATAGTATATTTACGCTTTTCTCAACAT
RM20091961701_62GT	ACGGCCTGGAAGGTCATCGTTGATCAGCGGCTTCTGCTCTAGCAGCCTGGGAGGACAGAGA[G/T]AGAAATTAGTGATCTTTTT
RM20091961704_59AC	TCAGGGTACAGACACATGACACTGTGGTATTATGTCTAAGAGGTTTTGGGTTGTTTAA[A/C]GAGACTGAACACTTTCAACTCT
RM20091961705_33CT	CATGCATGAAGAGGAACATCCATAGAGTTCTA[C/T]CCTACCTCACATAGGAAGAGGAACATCCGTAGAGTACGACCCTACCTC
RM20091961707_64AC	CCTGTTATTCTGCATGGGGCCATAGGAGGGGAAGCGGAGGCTGAACTTTATAATTGTCAGACC[A/C]AGCTTCCTCTCAGCTTT
RM20091961708_21CG	CACCTGGGGAACAGGTAGGA[C/G]ACATTTAACAAAGACTGAAGAGTTTTCATGTGTTATACATCAATAGAGACTGTTCCAGTG
RM20091961709_13AT	TGAGTCCCTGGA[A/T]CGTTCCAAAGGGAATCGAGGTGAATCGGAGGGAACAACCAGAGGTTTAGGAACTAGCTCTCTCAGTCC
RM20091961710_10AG	AAAATGTCA[A/G]TCCGTGCCTGTTGTTGCTGAATTAATTAATTAAATGGACTAATAAATATAACAAGAGCACAGGGGGAATAT
RM20091961711_66CT	GCTTGGTTCCTCTCTTATCTCCAGGCAAACATATAGTGAGCAGTGCACATACATCAATCCCTCCC[C/T]TGCACTCATGGTATG
RM20091961712_43AT	GCCACATTCTACACACCTGACTCAAGTCATTAACATATCATT[A/T]GCTGAAACAGGTGTGATTAGTTCTTTCCTAGAACAAAG
RM20091961713_32CG	AAAACCCACATGATATAATGATTGTATGTGA[C/G]GCTAACGTGACAACATGTAAGATAACATATGATGACATGAAACTACACA
RM20091961714_51AG	CCCAGCAACCGTAACCTAGGGAACTACGCCAAGTGTTCGGAGCCGGACGC[A/G]CTGAGAGGTCAGAAGCTGAAGAAGATGAGG
RM20091961715_63GT	TAAGAGTGAAAGGAACATGGCATCTAAGAGACATTTGCACGTATTGTAAAAAGGTTCAGAAG[G/T]AGAGTGAAACAAAATGGG
RM20091961716_8GT	CTGAGCA[G/T]CCATCTGTGGTGGATATCCACACACACTCTGGCTACCTTGTTCTGAAGGACCTGGGAGCTTATAAACAATTTC
RM20091961718_9CT	GAGATCCT[C/T]ATCGAAGAGGACATCCCCCTACGCAGCAGTCCCAGGGACACCGTCATGAGCCCCCAGACCCTGAAGCTCATC
RM20091961719_29CT	GCTCCACTGGGACACCTGCTGGGATGTC[C/T]CCTAAAGGGTTGGAGAGACTGTAGGGTCAAGCTTTCCAACAGAACATTTCAC
RM20091961720_78AC	GAAAGGAGAAGGTGCAGCTCAAACACCAAGTCAACCAGATCTGACCCAATGACCTCAGGACAGGAGGCTGAATGCTT[A/C]TTT
RM20091961721_51AC	GCTCCTGCACGTCATCTCTAGCCGACACTGTCATTTACCGTTCACCAGCA[A/C]GATCGGAGACCTGTGCCCAGTCCATGATGA
RM20091961722_50CT	GCTGCACCAACACAAGCATAAAGAAGGCCTTGTTTAATGCTCTCTCTAT[C/T]CCTCTCTCGCTGTCTTCCTTATCTCTCTCTC
RM20091961723_12AC	ACCAAAACATT[A/C]ATTTGTTAGTTGGTTGAAGCCTTGTATAAATCCTCTGAACCCATTCCTGGATTTAGAGTTGTAGATAAA
RM20091961725_49CT	CTGAGGTAAGGCCAGCATGGAGTCGTAGACCTTACACTGCATCTGTCC[C/T]GTGCTCTGGAAGACACAGCTCATCCATAACCC
RM20091961726_76AG	GGCAGGGATCGATGCTGCTAAACCTGTAGTAAAACACCTACCTTGTGTCATCAAGACCCTTGATATCATACTCAT[A/G]ACATG
RM20091961727_61AT	GCCGTGCTCACCGCGCTCGATGTGCTGCAGAAGGTGGGTGGGCCGCAGCACAAAAATTTT[A/T]ACATTTTTATAGCCAAAGCC
RM20091961728_79CT	CCATTAAGGTCCCTGATGGCACCGGAGTTGTGAACTTGTTACCTTTGTTTTAATTAATTTGTCATTTTATTGATGGGC[C/T]GT
RM20091961729_80CT	TCTGGCCTGTGGAGTGCAGGAGATTCTCATCCCATTGGACAGTTCTGTACAGCACTTCCCCCTCCCTCTTCATCAGAAA[C/T]A
RM20091961730_56CT	GAGAGCGAGAAGGAGAGAGTGGGAGCAGGTGAGATGGTTTAGCCTATTTGAACAT[C/T]GTCTCTAAAAACAAAATCAAATGTG
RM20091961731_16CT	AATCACTCGGCTCCG[C/T]CCCTTCTCACTGTCGCTAGTCTGGAGCCGAGCCCCGCCCAGTAGTGTGTCCCACAGTAGACCATA
RM20091961732_64GT	CTCCTCGACCGCAGGGTAGTCCGAGTGCTTCTTGGGCGTCCGCTTCAGCAGCTCCTAGTGGGG[G/T]GAGAGAGAGTAGGGAAT
RM20091961733_79CT	TACGATGTCCGTCTCGGCGTAGTGCGGCACGCTGCTCTGGAAGCACTGGTGAGGCGTGCACTGGGTCACATCGGGCTC[C/T]GC
RM20091961735_28AG	GGGAGAGAAGGGTAAAGGGGTGGGTCT[A/G]TTGGGTTCCACCACATCACCTGTGAGCTGTACATCTGGGGGTATCAATAACCC
RM20091961736_59AC	ACAGAAGGACACAGAGAGAGAACGACTGGGTTAGTCTAGGCCGTCAGCTAGCCTACAC[A/C]GGGGCTGAGATTGAGGCCACAG
RM20091961737_21CT	AGGGAACGTGGGCATACCGT[C/T]GCTTCTGGGGATGAGAGTTGATCAGTATTGAAACTGATCATGGCAACTAATAATCAATCA
RM20091961738_28AG	CTCCTGCTCGGAGTCGTTGAAGGTGCG[A/G]CAGCTGCCATCTAGCTTGTTGATGAGCAGGCATTTAAAGGGAGAGGGCTCCGA
RM20091961739_55CT	ACAGGAACTACAGAGCAAGCACTGTGGCTTTGCCCCCTGCCTCCCATCGACCCA[C/T]ACGCCAGGCCACTCTTATACCTCCTT
RM20091961740_21AT	GAGGGGCTGTTTGGCGAGCC[A/T]CAGCGCCATGGAGCACTGCGTTAGCCGGGAGCTGAGAGAAAAAGAGAGAGTGGTCCCCGT
RM20091961741_67AT	ACAATATTGTCGGGAAAAAAAACTAATTGATTAGGTATGTTTAGGAATGGCATTGTGTAACTGTGA[A/T]ATGAGAGTTGTGTG
RM20091961742_28AG	CCTTTCCTTTCTCAAACATGGGGAAAT[A/G]TGCAAAGGGTTAAAGTGTGCTGTCTGGAAAGTGAAGAGGTAGACACTAGATAG
RM20091961743_27GT	GTGGTCCTTAACGAGGACGAGAAGAA[G/T]CTGCTGGCTAAAGAGGGTGTCCACTTGCCCAGCCAACTGCCCTTTACTAAGGTA
RM20091961745_45CT	GTGTCTAGGTCCTTCAGCAGGATGTTCAGGTCAGCCCCCTCTTG[C/T]CCCGGCTGCAGGAAGGCCCTGAGACGCACCACCTCT
RM20091961746_27GT	GAGGTCCCGGAGCAGGCAATGCCCAT[G/T]GCAAAATGGGCTCCAACCCAGGATTGAACCAGTAGCCCAGTCGATCAGGGGATT
RM20091961747_70AG	GAAGGGGTCGATGACCTGGCACAGCTGATGAGGCTTGGCATCAAAGGAGGCGGAGCGGTGTAGAAGGCG[A/G]CCACTGCTGAA
RM20091961748_20AG	TGGACGTGCCTGGCAGGCA[A/G]GGCCTGTTTACTGTCACCTGTCAGTTGGGTAACACAACGCGGGGTGGCGTGCCATACAGCA
RM20091961749_67GT	GAGACTGGGGATGAGGTTGGGGCTGGAGCAAGGGTTGTCAGATCGGTAGAGTTTGCAATTTTACAT[G/T]ACTTTAAAGTAAAG
RM20091961750_24AT	TATTAGGTTCACAGGAAAGAATC[A/T]GATGACATCAATGAGCAGAAGAAGAAGAATGAACAATGATGCGTGATACATCCTATT
RM20091961751_78CT	TCACATTCTTCAACCAAAAGCGTCTGCTTAAGTGGCGTATACAATATGATTATATTACGGTATCTGTTGTACGTGTG[C/T]GGT
RM20091961752_78CT	ATCTGAGACCCTGAAACACTATAGGTACTTTGGGATGTTCAGAGTGAATAACAAGGAGTGTCTCTCTATTCACCCCT[C/T]GAA
RM20091961754_3AG	TG[A/G]TGTTCGGATGGATCGATCCTGTGCAGGTGTTGTTACAGGTGGTCTGCCACTGCGAGGACAATCAGCTGTCCGCCCTGT
RM20091961756_21CT	TACAGACTGGAGCCCCTCAT[C/T]CTTAAACATTACAGCAACATTGCACCTGCACAGATACACTGGTAAGAGTTCACAAAGTTC
RM20091961757_55CT	GGCGCACCGCCGGGCAAGCGCGACGTTTAGAGGGAACATTATTTACGAAGATTG[C/T]AAAATTGAGTCAACCCTACTTTATTG
RM20091961758_29AG	CACCAGCTGAGCAGACAACACACATTTA[A/G]TCACACTGTTCTTTCTAGTACTCAAGCCTTTCAACTTTTTTATTATCAAATA
RM20091961759_44CT	CATGTAGGGTAGTAACGTCACAAATTGAGATTATGGTTCATTG[C/T]TTAATTAGCTAGCTACATGTCTTAAGTTAAAAACCTG
RM20091961760_77GT	GTTTGAGAGAACATCATTTGGCCTGATAAGCTGAGCACCAATAGAGGAGTTTGGACACACTATCATAATGACTAGC[G/T]CAAC
RM20091961761_56CT	CACGTTAAATTCTACTGTTCGTTGCAATCGAGCGTTCCCACATACAAAAATGATA[C/T]AGTATACTACGGTTATAAAAACAAA
RM20091961763_31CG	GCCACCATTGGGAGGCATGAGGAGCTACTT[C/G]AGGACCTTCTGGAAGGGCTTGGTTCACTGACGGAACCACGACCAGGGGTT
RM20091961766_22GT	CCCACTGGAACATATCGAGGT[G/T]GAGAGTGAGTTTCTGAGTGGTGCCGTGCTTCACAACTCAAAAGGAGGGTCTTAAAACCC
RM20091961767_80GT	AAGTTCCACCTTCTCCCTGGGCAGCAGGGCCACAACCTGTCTCAGCGTTCCTCCATGTACGCAGAGCCCTTCCAGTTCA[G/T]C
RM20091961769_74AT	TTTGTCCCTGTTAGATACAAGCTCAGACTAAACATGCCCTCATCCAGTTTGAATTGCAACAATAATTGCATTC[A/T]TATCTTC
RM20091961770_67CT	GGAAAGAAACTACAATGTATACATTTCTCTACATAAAAGCGAGAGAAAGACATTCGTGAAAGATAA[C/T]GACGTACACTTCAT
RM20091961771_40CT	AGCAGAACACTCATTAATAAAAGGCCAAATGTATTATAA[C/T]GTGCACCTGTCTAGGCTGTAGGAGAGGAGAGTGTTCCCCCT
RM20091961772_47CT	GAGGAGGAGACCCAGGGAGTGTTCCAGCTGCTGGAGGGTGAGGCAT[C/T]CCCCCATACTCTGCTCATAAAAACCTGCAGTTTA
RM20091961773_2GT	T[G/T]AATTTGACTGCAAGTCTATTCAACATTTGGGTAAAAGGAAACCATGAATGAATTAAGAAATGTATATTTTATTAACAAT
RM20091961775_23CG	CTGAGAGGGACAGCCTGTTAAT[C/G]GGGGCACCCCCCCGACCATCCCTCCCACCTGCTCAGCAGCACTGCCAAGCTTTTCCAG
RM20091961776_24CT	CTGTATCAGGGTGTTGGACAGGA[C/T]CCTCTCCCGCTGGAGCAAACCTTCCAGAGACACACGGGACTCCTCGGCAGCAGACAG
RM20091961777_32AT	TGTAGGGTCTTTGTCCCGTTGAAAAACAAAT[A/T]ATACTAAGTGCAAACAAGATGGGATGGCGTATTGCTGCATATGCTGTGG
RM20091961778_6GT	AAAAT[G/T]GCTTTTAACTTCGTATCAAGTCATCTTACAGGAAACCATCTCATCTTCTGCTATTCAGTAAGACCAGAGAGAGAG
RM20091961779_12AT	AACATCACTAC[A/T]GCATTGCTACAATGTCACTACAACATAATACACAAGTGTTTCCCAAACCCGGTCCTGGGGCCCCAAAGG
RM20091961780_51AG	TGACTCCTGATGAATGCCCCGTCTGCGGAATCTCTCTTGCTCGCTCTCTC[A/G]GCAATCAAGTGTCACTGACGCATCCGTGGC
RM20091961782_16CT	CTCTCTCTCCCACTC[C/T]GCAGAAATGGAAGTAAAAAATCAAGTTGTTACAACAGAGAGAGATGTTGTAGTACAGTGACATCC
RM20091961783_16AG	CCTCTGCAGACCAGC[A/G]GATGTCTCTGAGGAGACGCACGTGCACACACACACCCTTAAGTAGGGCCAGGAGTTTCTCCTTAC
RM20091961784_41GT	ACACACAGACGTGATATACATATAAAACAATATCTTAAAT[G/T]TACTTATTCCTTTTTAGCTCCTAGTGAAGAAATAGCCTCA
RM20091961785_63CT	GGACAGACAGGCCTCTCCAACATAAACAGGCTGGGGGGAGGGAGAGACAGGCAGGACTACTG[C/T]TCACTGACCACAGGGAGA
RM20091961786_52CG	CTTGTCTCCAGTCTAGCCTGGGAGAATGTGGTGGTAAGTCATGACCATAGA[C/G]TCAGGTCTGTGGTCTTTTAACGCAGCTTA
RM20091961787_81AG	GATTTAATACCAGCCATAACAACACGTCTGTATTGAAGTTACACATTGCAGAGCAAAGCCTGAACATCTCGTGACAAGAC[A/G]
RM20091961788_79AG	TGACACAGGCTGATAGACTGAGGGAGAGAAACTGCAGAAAGCTCTGACACACACACTCAGTACATCCTGTAATCACAT[A/G]CA
RM20091961789_50AC	GTCCATGACCCTTTACCTCTTGTGTGTGGTCAACCCATCTGTCAAATGA[A/C]CACACAAGGTTTAGCTAGTGGCTGAGCACTC
RM20091961790_62AG	AAATAACCCCTCTTTTAGATTAGAGGAGCGGCGGAGGCCAAAACGTGGCGCCCCCACCTCT[A/G]GCTGACAGGCTTAACCAGC
RM20091961792_1CT	[C/T]TGTTCCTCCAGCACAAAAAGACCATATCCCCCAACAAACTGGAGGAGTACACCAACACCATGGTAACAACAAGCCCCAGC
RM20091961793_37CT	CAGAAGCTTAAGACACACTGACAGAGACACTACCTC[C/T]GTCTCTACTTTTCTCATCCTCCATGCCATCACCTGATTCTTACA
RM20091961794_53CT	CGTAGGTGTGTATTTCTTGTAACTAACACCACCTGGCAGTGAACAGTGATTA[C/T]ATAAAGAGAATGTACTATTGTGGTGTGT
RM20091961795_43GT	TGGGACAGATACAGTGCATTTCAGTGGGTCACCTCATCAGTC[G/T]GAGGTGAGAGTGGTTGATTGCCAGAAACGTTCCACAAT
RM20091961796_27AG	TTCTTAGAGATTTTACTGAGAAAATT[A/G]CCGTTAATCTCTTTCTTGAATAGGGCATCTTTCCCAGGGACATGAAACAAGCTA
RM20091961798_18CG	GAGTATCAGCCGTTCAG[C/G]GGAGTAAAAAAGGCTGAGAAGAAGACGGAGTAGGAGAGAGGATGAGGTGGAGGGGGGGACAAA
RM20091961800_75AG	CTTTGCTCTCTGATGACAAAACACTGAGAGGTAGACGAGTGGGAAGACCAAGAGCAGAGCAATAGCACTAGCTA[A/G]CCGACA
RM20091961801_70GT	TAATGTTTTAGGTCTATAAGTTGTTATAAGCATCCATGAGCTTTTAGAATCATCGAATGGTGCTGTATA[G/T]CAGTGTTTCAG
RM20091961802_80AG	TAAAACCTTCCGGAAAGCTGTTTATTATACAAGCACTTTACACTTAAATATTCCAGCCATCCACGGTTCAATATGGTTG[A/G]G
RM20091961804_31AT	GATTGATAGATTTGGCAGTTAACAATCAAT[A/T]GGGGGCAGGCAACTCAATACAAGCCTCAGCCTGACTTTTTCTACATCACA
RM20091961805_43AG	CATCCTGACATGACCCTCCAGCATGACAATGCCAGCAGCCAT[A/G]CTACATCATGACTGGTTGTGTCAATGCCACAATAAAAT
RM20091961806_68AC	TTGTTTGGTCAACTGCTGCACAGAAGAAATATCAGCACAGGGCAGAGAAGCACCAGATTGAACTTCA[A/C]TGAGCTTTCTAGA
RM20091961808_47AG	AGGGTACCACATGAGGGAGGAGGATATCTTCCCTGTAACGCACAGC[A/G]TTGAGATTACCTGCAATGACAAGCTCAGTCCGGT
RM20091961809_48GT	GGTAACTTTCCTGGGTAATAGTTAGGCATCCCTGCACAAGTGACACT[G/T]TTGGGTGCTGTGGACTAACCTGTGCCCCCCTGT
RM20091961810_47CT	CCACTAACCTTCAGGAGAAAACGGAGAGATGAAAGAAAAAAGAGAG[C/T]GAGGGAGGGAGCGAGAGAGCAGGAAGAGGTTGAG
RM20091961811_77AG	CTGGGGACCAACTCGGTAAGTAACACCCCATGGTCCTTTGTGGCTCAGCTGCTCGACCATGGCACTTGCCACGTAA[A/G]GATT
RM20091961812_50CT	TCAGTTGGATCTTATCTTGATGAATGTCCAGTTATTTGTTCAGGTGCTG[C/T]AAATAAAGACCTAGTAAAGCCGCAGCTGGTC
RM20091961813_74AG	ATGGAGGGAGGGATCAGAAGAACAGATGAATAAAGAGGACAGAAGAATCTGTTTACATCAGCCACGTCCTTCC[A/G]CTCTCTC
RM20091961814_71CT	GGGCTCAGCGAGGACCGGCTGCAGTGCGTCTCCTCCCAGGGACTCCCTCATCACGTCACTGAGCCTATAG[C/T]GGTCCTGTGA
RM20091961816_76AC	GAGTACCACATGAGGGAGGAAGATGTCTTCCCTGTAACGAACAGCGTTGAGATTGCCTGCAATGACAACACACTC[A/C]GTCTG
RM20091961817_11GT	ATGTTTTGCA[G/T]AGGCTACACTGCAATTACTGCAGTGACCTTTTCCCAAGCATAACAATGTGTTCATCTGGAATAGTTAGCT
RM20091961818_3AC	GT[A/C]GTGATTGCGCATTAGTTCATTATTTCGATTTAAATTCACAATAGAAAGTAGGCTACCTTGTACGAGAAACTTCGCTTC
RM20091961819_45AT	AGTGGCGCTATGGCTTGGGGCTGAGAACGTGCAACGCAGGGTGC[A/T]ATTCTGGTTAGCCATACTGGAAGAGAAAAGGCCTAT
RM20091961820_3GT	CA[G/T]CCACAGCCCCAGTGCCCATACTCTTCCTCGCCCTAGTGTCGTCTGCTGACAGCTCCTTTTAAGGCTCCATTGTGTTAA
RM20091961821_19CT	CTCATCCAGTGGAGGCAA[C/T]GCCCCAGCCCCTGGGCTAACCCCAGACAACCCACACAATGACCGCCAGGGCAGCCAGATGCA
RM20091961822_71CG	CCCCTCAGTCACTACTGGGTCTCTGTTACCATCGACTTCAAACAGCTACTCTCCAGAGACTGTGAGTGGA[C/G]TGTGTGTGTG
RM20091961823_10GT	TGGGTCACT[G/T]ATCCCAGCCACATTGTGTTCTGGAGAGTAACCCGACATCACCAGGCCTTTCATCATCAGGACCAGCTCCGG
RM20091961825_13CT	ATAATTGCTTGA[C/T]AAACCTACTGCAGCAATGCACATTTAGGAGAGAACATGATGGAGAGATAACAGAAAATCTGAGATGTC
RM20091961826_17AT	GGGTACCACATGAGGG[A/T]GGTGGACGTCTTCCCTGTAACGCATAGCGCTGAGATTGCCTGCAATGTCAAGAAGCTCAGTCTG
RM20091961827_9AG	AAGTCCAT[A/G]ATGCTTCTGCAGGACTCCTGCATTAGTATGACTTGTCCTGCAGAATTTTTGAAAATCTTGTACAACCATGAC
RM20091961828_63AG	ACTGTTATCAGCATCTCACAACTCTAAGCTCCACACTCCACTCCCCATCCCCCATGACCGGA[A/G]CCTGAGAATCTAGACTCT
RM20091961829_17AG	AAACAAAGACAGCTGG[A/G]TAGGCCGTGTGTGTGGCATGAATTAAACCCTATAAAGCAGTCAATGCATTTCTAAGGAAAGCTG
RM20091961830_73AT	GAAAGAGAGGGAGGTTCATGGAGAGTTCAGTCCTGTTCATAATGATTGCAGCCAGGTAACTGACAAAAATAA[A/T]GGAAACAC
RM20091961831_18CT	CTGGTTGTAGTTGGTCT[C/T]CCTGTGGCCCATTAACCACTGTGGGTTTAACAAGAGACTAGAGATGGAAGACACAGAGCAGAG
RM20091961832_4GT	GGA[G/T]GGGAGGAATTGGGACCAGGGGGAGATCAATACTGCAGCCTGCCAAGCTGAGCTCAGAGCCAACACAAACTCAGCCAG
RM20091961833_1CT	[C/T]TGTGTACTGCTGTGACCCAGCAGAACCTGCTGAAGACAGTCACCCAGATCTTCACCGAGGCAGAGGCGGTCCGATCCCGC
RM20091961834_18AC	CATCCTGAAATTGCCCT[A/C]TGGCATGACAATGCAACCAGCCATACTGCTCGTTCTAAACGTGATTTCCTGGAAGACAGGAAT
RM20091961835_78AC	ACCAGGTTCAGGGTCTCCAGCTTGGTGAGGTTGTGGAACATAGTGGCCAGCCCTGGCTGCCGGTAGAGTTCCACTCC[A/C]ATT
RM20091961836_33AG	GCAGTCATCAAAACAAGGAGTCACATACTTAT[A/G]TACACACACAGCCTAGCCAGCAGCACAGCGCAAGCAATTAAAGGGACG
RM20091961837_26AG	TCATTTGAAACACACCGTGGCACAC[A/G]GTACTGTGTTAACGCCAAGAGGGTTTTGTCTGAGCATGATCTCATTATGCAACCT
RM20091961838_30CT	GAACCGCCCCTGCACTGCAGAGGAGGAGC[C/T]GTGACAATTCCTATTACTGTAACCCAACTATAGTCTATTGCATATTGCTAA
RM20091961840_17AG	AGCTGCTGGCCTTGTC[A/G]TCCGTCTCCATAGCGTCACTGAGACATTTTTTAAAACATATTGGCTAAATCAACTTTGTATCAC
RM20091961841_27CT	GTATGGTTGAAGCACGTTCACATTCA[C/T]AGGTGACCTTAACACACACACCCGTGGTCAGTGTAGGGGCATATCGTACAGACA
RM20091961843_69AG	CTAGCTTTATCTTATCTTGATTATTGTCCAGTAACGCGGTCAAGTGCTGCTCAGAAAGACCTAGTTAA[A/G]CTGCGCAAGCTC
RM20091961844_55CG	CACACACACACATACAATTATTGATGTTCCTCTCTGCCTGGCTGATGTCTGCTT[C/G]CCAGCCGAGATTAAATGAGAAAGAGA
RM20091961846_46GT	GGCCTGTGTGCATAACTCTCTGTGGGTCCTTTTACTGAGTCAGAA[G/T]CATCACACTTCACTGGAGTATGTCAAAGTGCATCC
RM20091961847_2AG	C[A/G]CCAGATAACAACAGCTTTATGCCTATGACCTATATTCACAAATAGGTTGTAAACCCACTTTTATTTTTCTACTGACATC
RM20091961848_22GT	ATAAGTTCTTTAGAGTTACCA[G/T]CCTCAGAAATTGCAGCCCAAATAAATGCTTCACAGAGTTCAAGTAACAGACACGTCTCA
RM20091961849_70AT	GAAATAAAAATATAAATCATGCCTTACCTTTGACGAGCTTCTTCTGTTGGCACTCCAATATGTCCCATA[A/T]ACATCACAAAT
RM20091961850_24AG	GAGGAGGATGTCTTCCCTGTAAC[A/G]CACAACATTGAGATTGCCTGCAATGACAACAAGCTCAGTCCGATGATGCTGTGACAC
RM20091961852_80AG	GCATATGGAAACAGAACTTGCTGTCTGCTGGCAAGGCTTGCTAGATATAAGGTGTTACATAAAAGGCTTGTGGACATAA[A/G]G
RM20091961853_19CT	CGCTCGCCCGTCGGCAGC[C/T]TGAGCAGCAACGGCAGCTCCTACGAGGGGGACCGGGACGATGGGGCCCAGGGGCGGGCCCAG
RM20091961854_49AG	GAACCTGGCACTGTGAGTGGGGCTACCAGGCCATCAAAAGCCAGCAGC[A/G]GGGCTTCCGCTGGGGAGCGGCTTGAGAGGCTA
RM20091961855_4CT	GCT[C/T]TCCACGTATTGCAGCAGGTAGAGGCCGCAGTCGCTGCTGTTGTCCTGTAGGGGGACCTTACAGTGGGAGCCTTGCAT
RM20091961856_76AC	CTAATTCTCTCAAAGGCAACACAGAAGGGTTGCTGACATCTGCCACAACACCCCGAGCTCTTAAAAAAAGGAATC[A/C]TTCCT
RM20091961857_72CT	CATCCAGACATGACCCTCCAGCATGACAATGCCACCAGCCATACTGCTCGTTCTGTGCCAGATTTCCTAAA[C/T]GCGAATCAG
RM20091961858_39AC	GAGTACATGTCGTTCAGCGCCCATGCAGATGCTAAGGG[A/C]ATCATGCAGCTCTTCCGCATGGCAGAGCCTCACAACATGCTG
RM20091961860_33CT	GGATTTCAGATACAGAGCTGTTCTGTCCTTAA[C/T]GATTTACTGTCAAAGTTGGATAAAACCAAAGTTGTGTTTGTTATTGAT
RM20091961861_40AT	CTCGCACGACGCCTCCCGACATAGTAGCTAACGTTAGCT[A/T]GTTTATTTTAGCGTTAGGTTGAAATTAAAAGCGAGTTCTCA
RM20091961862_49AT	AAAATATGTGTCCAGACGTTAAGTGAAGGTTGTTCAGGGGCGGGAAAC[A/T]AATGGACAAGGACATTCAGACATCACTGTGCC
RM20091961863_44CT	CATCCCTACATGACCGTCCAGCATGACAATGCCACCAGCCATA[C/T]TGCTTGGTCTGTGCGTGATTTCTTGTCAGTGTTCAGT
RM20091961864_67AG	GATTTATTGCGCAGGACCCTGGTCAGTGGAGTGGATCCAGATCATTATCTGATGCTTACATGCATC[A/G]GTGGGAGAGGGCTC
RM20091961865_67CT	GACCAGTTGATTCAGCAGCTGAACTCTAAGGGAGAGACCAACTGAGGAGTGGGTTGCAGTCTGGGC[C/T]GGTCCAGTGAGAAA
RM20091961866_40AG	GGACAAACACATGGAGAGGAGTCAGGTAGTCCAGATATA[A/G]GTACAGGGGGGATGGGGATGGGAAAAACAAAAAAATGACTT
RM20091961867_63GT	GCTCAGATGTGAGAAGGTTAATAAAATAATAAACAAACTACTTTATGATGTTCTGGGTGATA[G/T]TTAATGAGTTTTGTGCTG
RM20091961869_18CT	AGAACGCCTGTGCTTTC[C/T]TGCTGATCGCTCCCATGTGCAGCACTTCCTAAATTCCATTACGATCAAAGCTGTGAAAATATC
RM20091961870_43AC	TACGTACAAAGACGTTTCAAAGACTATTTGTTGAATTTAATT[A/C]TAATGTACATATTCCATGCATAATCAGTAAGACATCTC
RM20091961872_70AG	ACAATCGTCCCTCTGAACATCTCAGGCTGTCCTACTTGTCTGGCCCAGTTGTTCTCCTGCAGTGCCAGC[A/G]GGGCAAGGTGA
RM20091961873_61AG	GTTGAAGTTGTTTTGTTTCTGCATGCTGTAGTAACCGCTGTACCTAGAATCAGGGTCGGC[A/G]ATCCGGAGCATGCGCTGCGA
RM20091961874_41GT	TGAAATATGCTAACTCCTTTGTTTACTGCTGGTGCAGATG[G/T]TGTAGGCTATCAGAAAATAACTTCTTATGCTTTCGCCCGA
RM20091961875_26GT	CATGACTTGGTTCTTATGTTGTTAT[G/T]ACACTACATTGTTCTGTATCAAAAGCTTATGGATATCAAACAAGTTGGTCATTTC
RM20091961876_80CT	CCTTCAACTGAAGGGAAGTGGCTGTTGGAGTGTTTGGAGCTGTCACTGTTTTTCCCACACTCCCCATTCTCCATACGCT[C/T]A
RM20091961879_23GT	TTGAACCCCATGACCTTGGTAT[G/T]ACCTCACCAAGATGCATGGCTAAGTGTTTTTAGAGAACAAGTTTTTGCCAACGGTCTG
RM20091961881_51CT	AGACTGCCGCTGGGCCTCCTCCTCCAGGGCTATGGAGGCCTCCCTCACCT[C/T]CCTCACTTCCTGCTCTAGGCCCAGGTGACG
RM20091961882_52CT	ACCACATGAGGGAGGAGGATGTCTTCCCTGTAACGTACAGCATTGAGATTT[C/T]CTGCAATGACAACAAGCTCAGTCCGATGA
RM20091961883_53AC	GCCAAGCAGACTGCAGACTGTCTCCTTTCACATGCACACTACATCCCTCTAA[A/C]CTAAATACCACAGCTTGGGAAAACACCT
RM20091961884_51AC	TAAGAAATATGTTGATTGTACAGTAAATATATGGACAGGGGACTAACATA[A/C]GTATTCTTTGAACCTTTTGATTGTGAAATC
RM20091961885_27CT	TCCTCCCTGTGGCATAAACTGGCTGT[C/T]CTCAACGCAAGCCGGTAGATTTGTTCTGGTCTGGCTACCACTGGCTGAGGGTGG
RM20091961886_50AG	GTTTCCTGCTCTACTGATGGCGGCATGGATCGTTGGCTGCATGGTGGTA[A/G]TCTATTTTGTCTTCGCCTAGGTACGGTGTGT
RM20091961887_16CT	GTTGGACTCGTTCTC[C/T]ACCTGGAGGGAAACGGGGTGGGGAGGAGGATTAAGGGGAGGATTTGTAAACAGGTACAGACAATA
RM20091961888_1AG	[A/G]TTTTCCTTCCAGTAAAATGGTAATACATGTGGCGTTCTTATATCTCCCATTCACAGCTGGACATTTTATGCAATGAGGAA
RM20091961889_51CT	GATCTAGGCGTAGAGCATAGGACACCACGGCTCAGAGAGACCAAATAATT[C/T]GGGTTTGTAGCATGAAATACATCTCTGCAA
RM20091961890_69AG	GAGGTGGCCCGCCTCAACGCCAAGTTCCTGGTTAACCTGGACCCCTCATTCTGCAGTAACAACGGCAC[A/G]GTACATCTAATC
RM20091961891_21GT	AGTTATTGGTCCCTACCATT[G/T]TAAGGTAAGCACAGAACAAACCAGTGGAATTCAAGGGAATGTTCAGTATACAGCTGTACT
RM20091961892_74CT	AATTATCCTGTATGTCAGAATCGTCATCAGGCCCATTGTGTAAGCACACACAGGAGGGTCATTCTCAATCAGA[C/T]TCTCTTG
RM20091961893_21GT	TGTAAGGGCTATTTAACCAA[G/T]GAGAGTTATGGAGTGCTGCATCAAATAACCTGGCCTCCACTATCCCCCGACCTCAACCCA
RM20091961894_15AG	GGAACGACTGTCTC[A/G]TAAAGCAGTGGTTCATCAACCGTGACGATGATCATCATGCTATATCACTGCTATCATTAACCCAGC
RM20091961895_58AC	GTCACTCATTCAAGACATCTATATTACATCTGCGGGATGCAGTCCTCCAACGATAAT[A/C]ATTTCTCTGTTTCACTTTCGGCA
RM20091961897_53AC	CTGAAAGAACATCCTCCAGAGATCCCCACATCCCTGTGTCATCTCCCCTCCA[A/C]CTCCCACCCTCCGCCCGCGTATAATACA
RM20091961898_76CT	TGATGTTCGGATGTACCGATCCTGTGCAGGTGTTACACGTGGTCTGCCACTGTCCGTCCTGTCTCCCTGTAGTGC[C/T]GTCTT
RM20091961899_39GT	AATTCTACACGAGAAAACAATAAATTAAATATATAGAT[G/T]ATTTACCTTTTATTGTGGATATCTCTCTGCGCTATCCCTGCA
RM20091961900_7AG	AATGAA[A/G]GGAAAGACAAGAGGTTGACATTTTCAACATCACACTAGTGACATGATACCAGAAATGTGACCTTTGATACCAAT
RM20091961903_71CT	AGGGGGGCTACTGGAGTGGAGTGGTGGGGCTGAGTTCTGTGGTTTAGCCAGCATTTCTACTCTCTGCTCA[C/T]ATGATTGCCT
RM20091961904_63AG	ATTTCTAAACCTCAGACTGTCAGGACCGAGTCCAGGGTCCAGGGTCCAAGGTCCAGGGTCCA[A/G]GGTCCAGGGTCCAAGGTC
RM20091961905_72GT	GTGATGTGGCCTTGGGCTAGTCAGGTCCTAGCGTTTTAGTATGCCGCCTGGTTAGCATGGAGAGAGCTTGC[G/T]GAGGTATAC
RM20091961906_77AG	ACTTCGCTTCTTGATTTGCTCAGAACGAGGACGAAGCATACTGTAGGTAACTGCAGCATGGCCACGGGGACGGGCC[A/G]CCAT
RM20091961907_41AC	TGACACAAAACGCAGAAATAAAAATATTATTCATGCCTTA[A/C]CTTTGACAAGCTTCTTTTGTTGGTACACCCATAAACGTCA
RM20091961908_61AT	CTGGCCCTCCACATTACGCTGTTCCATCACCTGGGAGACAGAGGGAAGAAGAGAGATGAC[A/T]TAGACAGGCAAATATACTAC
RM20091961910_39GT	CTTCCGAGGTTCACATCAAGAGATTCCAAGTACTGTAC[G/T]ACTGCAGCACACCATGATAGCTCACTCACACACCTGACCTCT
RM20091961912_54AT	CATCCATCAAAGCAGGAGGCGAGACACTCGATGTGGGTATGGTGCGGTACAGT[A/T]TACTGTATGCTCAGAGATGCAAGCTTA
RM20091961913_41CT	GTGGGGTCACGGCCAGGGTCACCATTGTACAGCTCCCCTG[C/T]AGAAATGACGGTTAAGTGCCTTGCTCAACAGACTTTTCAC
RM20091961914_44CT	ATGTCTGATCTCCCGCTTTTGTGTCTGGTTCCTTCCAATGTTT[C/T]GTCCTAGTACCCTTACCACACTGTACAAATGGCATTC
RM20091961915_76AG	ACAATGACACAACATCCCAAGAACATTCAGGGGACCATGACACAACGTCCCAAGAGCGCAATCCTAAGGACTAGT[A/G]AAATG
RM20091961917_49GT	GCTCTACTACTGCTATCCTGACACTAGTAGGATATACTCTATTAGTAC[G/T]ATCCTGACACACTACTACCATCATGACACACT
RM20091961918_77AC	TTTTTGGAGTGGGGTGTCAAAAAAGCAGAGCATGTCTTTTAATGGAGAGACAGAGGATGAGAGGCACATCTTTATA[A/C]GGAG
RM20091961919_48CT	TGAAATGTTTTCTCTCTTTGTTTACTATTATCCTCAGATAATAGCAT[C/T]GTTTGCTTTCGCCGAAAACCCTTTTTGAAATTT
RM20091961921_29CT	GTTGGGAGATGCTCCACAGAGTGTTCCA[C/T]GGATCGACTTTGAAGATGATTGACATGATAAGGATGATTATCAGACTGTTTT
RM20091961923_51AG	GTAGTAGCACCGCTCCACCTGAAGGGAGGATGGAGAGAGTGCAGAAAGGG[A/G]ACATGATGGAGAGAGGAGACGAGAGGGGGG
RM20091961924_57AC	GCCAGTTCAGCAGAGATGGAGGCTCGTCTGGCCTGTGGTCTGGTGAAGGGTCATGC[A/C]TACGCTGTGACAGACGTTAGAAAA
RM20091961925_78AG	ATATACTCCACTCCTTCCCTATACCTCTCCAAAATAACAAAACCCAGCAGCTCACTATCTCTCTACACCAGCAGGTG[A/G]TCA
RM20091961926_43AG	TATTACAGACAGCCTGAGCCCGCCCTCCGTCTCAGCCAAACC[A/G]TAAGTGGTTTTTATAAACTTAAATTTGACAGGGAGCGA
RM20091961927_46AG	AGAGCATCTGGCCCTCACAGCAGAGCCCAGGAAAGGGAAACCCTC[A/G]GTCAACAGATATACACACGCTTGCACACACACACT
RM20091961928_73CT	AAGGCCCAGCCGCAGGCCCTCTCCCCTGGGCAGCAAGAGGCCAGAGGTGGCCTAGGGGAGCTAGATGGGTCT[C/T]TACCTGAG
RM20091961929_23AG	AGTTCACACACAGGTGGGGTAA[A/G]CAGTCTTAATGAATGACTTTTTAACTGCGCTCCATGGTGGGCCGCAGCACGTGTGCCT
RM20091961930_18AG	TGAAAGGCAGGCTGTGG[A/G]CCCAGAAACTGGATCGAAGCTTGGCCACATTTCACCTCAGAGTAGAGCAGAGAACTCTCCATC
RM20091961931_35AT	TTAGTTTTTTCTTATCTTGATTATTGCCCTGTCA[A/T]ATGGTAAGGTGCTGCAAAGTAGGATCTAGACAAACTGCAGCTGGCC
RM20091961932_50AG	AGGCTCCTCATCAACTTGCACTCTGTCATCATGATGACTCTGACCGGAG[A/G]ATTCCTGTTAACATACCTCCATTTGACTCTG
RM20091961933_47CT	TGGACACACGTTTGCTCATTACACCACCCATCCAACCACTGACAAG[C/T]GCTGTCACAGCCCCTAATTGGTTCTCATATGGTT
RM20091961934_30AC	GTCTTCGCCAGCAGAGACTCTGCTAACAT[A/C]TTCTACCGCGCGGACATGATGGTGATGATAGATATCGCTGTTCGATGCATC
RM20091961935_24AG	CGTCTGGGGGGAGGGGTGCTGTG[A/G]AGTATTTCTGTTTGTAATAAAGCCCTTTTGTGGAGAAAAATGCATACTGTTTGGCTG
RM20091961936_42AT	TTCATGACACTCCCAAGCCATCACATAAGGAACACCAGACA[A/T]TACAAAGAAAAGAACTGGTGGTGGTAACAAAGGAAAAAA
RM20091961937_4AG	CAT[A/G]GCTAACAAACAGATGGTTTTAATATTCCAGAGGCTAATTTTACATCAATTAAAAACACAGCAAGACATTAGCATCTA
RM20091961939_49GT	ATGCTGTTTCAGGTGTCTGAGAAATGGCTGCTTGACATCCCTGTGTCT[G/T]TGAGGCTGTGTGCGTGTGTAGTTGCGTGTTTG
RM20091961940_79AG	GGGGACCTGGGCCCCAACACTGGCAGCATGGGGGCCTACTGCCCCACCCCTCAGGTACACACACACTTGACAACCACC[A/G]AC
RM20091961941_60CT	GGGCTCTGTTTTTTAACAGTTATGAATAGATGCTTTTCTTACTTCCTCTTCTATACAGT[C/T]CTGCCCAGGAGCAGATATATA
RM20091961942_42AT	CAGAGGAGCAGACAGCTGATGACTTCCCCTAGCCCAGTGGG[A/T]TCCGCCGAGGGGAAGGTCCTGCCAACGGTCAACTTCCAG
RM20091961943_62GT	ACCAAAAACATGAGGGGCTTAGAAAATATGTCTGCTGTTAGTATTAGTGTCCATTATAAAT[G/T]AGTTGTTTGGCTCCTGGAT
RM20091961944_63AT	AACTCATTCTCCCACTCTTTTAGAAAAGGAAGTTAAATCCCTTTGTTAACAGAGAGAGAGAG[A/T]TGTACGGTAACATCAAAA
RM20091961945_36AG	GGGTACCACATGGAGGAGGATGTCTTCCCTGTAGC[A/G]CACAGCGTTGAGATTGCCTGCAATGACAACAAGCTGATGATGCTG
RM20091961946_57AG	CAGAAGGACTGGTGCCGAGGTAGAGAGCCTAGGGGGCTTCGGGCTTCCCTCGGTGG[A/G]GTGGTTTCCCACCTGCGCGCCCCC
RM20091961947_40AC	ATGGGATAAGGAGATAAAGTATGTTACACCAATTAAACC[A/C]CTCACCCAACAAGGTGAACAAACAATCAAATAGCTACATTC
RM20091961948_39CT	AGATGTACTGATCCTGTGCAGGTGTTGTTACACGTGGT[C/T]TGCCACTGCGAGGATGATCAGCTGTCCGTCCTGTCTCCCTGT
RM20091961949_48CT	CCCCATCTCAGAAACATGGAGAGCAGGTTTGCCCTGCAGCAGAAGAT[C/T]GTGGAAGCGGCCAAGAAACTAGCCAACGAGGCT
RM20091961950_14AC	ACACCCCCATCTC[A/C]TCCCTACCTGCTGGACAAAGGCTCAGTGCCCCAACCCCACCAACCTCCAAACTGCAGTGTGAGGTGA
RM20091961951_51CG	GATGTTCCAACCAACCCTTCAACAACTTATCTGTCAGGTGTCTGCAGCAG[C/G]AAACAACCCCAATAGAGACAAGGGTTGCAC
RM20091961952_9GT	CCGGAGCA[G/T]GAGAGGCACAGGGAGAGGCTCCACAGCACAGAGAGGGTGAGTGAGGAGCAGGCCAGGATCTGCAGCCGGGCT
RM20091961955_62AT	TCTCGGTTCGCTCAGCTGGTCGGCCGTCTGGTGTGTTATGAAACCCTCTCCGCATGTCCAA[A/T]AGTGGCAGGATTCAGAAAA
RM20091961956_78AC	GACGAGGGTCTTGACCCTGAGGCCATGGGCTGCCCGGAGGTAGAGAGGGAGGTGGCCTATCAGGTGAAGCCTCACCG[A/C]GGG
RM20091961957_63CT	ACCAGCCTTTTTATGTACGTTCCTTTGGATATCTTTTCTCAAATTCCGAGCTATATAACAAC[C/T]AACTCTATGGACAATCAG
RM20091961958_60CT	CTTCCTGACATGACCCTCCAGCATGACAATGCCACCAGCCATATACTGCTCATTCTGTG[C/T]AGGATTTCCTGCAAGACAGGA
RM20091961959_4AT	CAG[A/T]TGCAGCCAGTCAGTCAGTGTGACAGAGGAAGCAGTGTTCTGCCTTTGATGGGCTCCATGTTTGACAATATGAGACGG
RM20091961960_65AG	TACACGACCGGTCAGCATGTGTAGAACACGTACAGATCAGCTCTGTAAATCACTCAGACATTCA[A/G]AACTAAACACAAAGGT
RM20091961961_63CG	ACAAAACCTGTTTTGAACCAAATCATTTCTGCAGAAGAGGTTTGTTTACAGCACATGTCAAA[C/G]TCATTCCACAGAGGGCCA
RM20091961962_44CT	CAGTTATGTGGATGCTGTACATTCAGGATGTGTAATCCCAGAG[C/T]ACGCTGCTAGTGCTAACACAACCATCCCAGTGAGCAC
RM20091961963_25AC	TGTGTAGTCTTGCTGAGGTCTTCT[A/C]TGTTAATAATTAGCATTTTGAATTGTTATAGTAAATTGAGGTGACTATACTGACAA
RM20091961964_46AC	TCATTTGGATCTTGGGCTAACTTGTTATGTACACTACCTGTCAAA[A/C]GTTTTAGAACAAGGGTTTTTCTTTATTTTACTATT
RM20091961965_6CT	TAAAC[C/T]TCTGTGTCTGTGTTCTCTCTCTGACCGGGCTGGTCCTGGTCCTTTTGGCAGAGACCGCTCTCTCTCTCAGTCTCT
RM20091961966_54AT	ATTAATTATGATCTTTATAAATTAAATTAGGAAGATGTCACTGGTTGATTTTT[A/T]AAAATCTTCCTCCCACACAGGTTAAGA
RM20091961967_65CT	CAGGCCCAGCCACTGGATTCCTGAAACAGAGCGGAGTTCACATGGACTCCAAGGGTTTCGTCCC[C/T]GTCAACAAGGTAGAAA
RM20091961969_80AG	GTTGTTCAGGATGTTACAGCGCATGACAGGTGTGTAGAGCCTGCAAGTAGTTATTCACCCTGCTACAGGACAGGTGTGT[A/G]G
RM20091961970_12CT	ACAGACTTCTT[C/T]GCAGAGAAGATCCTGCAGATCTTTGAGATGATGATCGTGCGCCACGGCTTTATGCTGGTGGGGGAGCCC
RM20091961971_45AT	GTTTTCAAACTGAGCACAAAACAAGCCAATAACCATACACAGAA[A/T]GAACCGACAACATGAAATGCATATTGGAGAAATGTT
RM20091961972_35AG	GCATGGGTAAAGATCAGGCCGGCTCTGCTTGCAA[A/G]GTCAACATACACAGTGCATCTTGATGTTCCTTCCTGGTTCCTGCCC
RM20091961973_19AC	AACTAGGCACCACCATCA[A/C]CTAATTTGCTGCATGTTGTCCTTTTGAAATAAAAAGTATAATTTTTTCATCACACAATCAGA
RM20091961975_15AC	ACGTGCAGATGTTT[A/C]ATTTCTGGCTGAAGCCAGCGCAAATTCCTTCTATTTATGTGTCCAGGTTAAATGTGGGACGTCCCT
RM20091961976_17AC	ATGGCAATTTCAAGTT[A/C]ACTACAGGATTTGAGATACAGTATGATGCAGAGAAACATTTGAAATGTAGTGCAATATCAGACA
RM20091961977_43AT	AAACACACACAGAGAGATGTTTACCTTCCAACATCCATACAG[A/T]CAAGGCTTCAAAATAAGATCCTACAGTAAATCATTTAA
RM20091961978_61AG	TCCAGTCTCAAAGAACTCAACACTCACAGAAACTCTCTCAGTAAGGCAATACAAGGTGAG[A/G]GTCACTCGGCTAATACACTG
RM20091961979_66AC	GACACCGATCCTTTAGAGGTTATTAAAGCAAAAATGATTGCTGATGGTGAACCCGAACAATCAAA[A/C]TATAATCTAATTTAG
RM20091961980_52AC	TGAAATATGCTTTTCTCTCTTTGTTTTACGGAGGTGCTATCCTCAGATAAT[A/C]GAATCGATTGCTTTCGCCGAAAAGCCTTT
RM20091961981_1GT	[G/T]GGTACCACATGAGGGAGGAGGATGTATTCCCAATAAAGCACAGCATTGAGATTGCCTGCAATGACAAGCTCAGTCCGATG
RM20091961982_23GT	GGACGCCCCCTGTAGAGGCGTG[G/T]ACACAGAGGCGTGTGACCATGGCAGCAGTGCAGGAGGCCCTGCTGTCCCTCACCTGAA
RM20091961983_20CG	CCTCATCTCGTTCTGGTCA[C/G]CGTCTCCATCCGTCACCACAAGGGACATGGCCTGCATCCGGGGGAACCAGTCCAGGTTCTT
RM20091961984_17CT	TACACTCAGCTCCTCT[C/T]TCCCCTCCAACCTGACCTTATCATCCTCATCACAGACACATTATCTCTCCTGTCTGATTAGCTG
RM20091961985_20AT	TAACTAACCCCAGCTCCTT[A/T]ATCAAGCTTCGATCTAACGCTCACTAGCACAGATATTGTAAGTCAGTGTGCTATGCCCCAG
RM20091961986_47CG	TTCCTGTAAATCACTGCAGCAGGCCAGATGCGATGAAGCATCCACA[C/G]AGCCAACAGACATAGCATTTGCTGATTAATATCT
RM20091961987_38CT	GTTTTAGAACTGGGGTAGAACAAAAACCCACACATAC[C/T]GCAGCCGTCAAGCACCAAGTGGGAAGATTAGAACCCTTGTATC
RM20091961989_77AG	TTGGACATGTACTACCAGAGTCCACAGTCTTAGCTTTACTGACTACACACCATCCTCTCATACTGAGCAACAGTAG[A/G]GCAA
RM20091961990_21AG	GAGTCCAGGAGGGAGGATCC[A/G]CTGGGTTCAGATCCAGGGATGGCCAAAATCACAGACACCACTGTCATCACACCTTCAGTG
RM20091961991_56AG	TGTTTCTGTTTGTTTTAGGTTGAACACAGAGAATAGACTTTAACGCAGGCAGCTC[A/G]CAGGATAAAGATCTAAATTAGACAG
RM20091961992_32AG	AACATGTTTCAGTGTCTGGAGCTCCCGGTCC[A/G]GCTCAGTGGGTCTCTGGATGGCCTTTAGTCTCTGGCTTGACACAGGGTG
RM20091961993_2AG	C[A/G]GGCGAATCCGACCATGTCTTCATCTTGTTGCTCCCCTCCTATAGGCAGAAACTAAAACAGGAAGCGCCCGTGCTTAGGT
RM20091961994_37GT	GAGGTTACAAACATGACACAGAAAACTCTACATATA[G/T]AGTTTTTTTTCTTCTCAATTATCTGGTCAAGTTTATACATTGTG
RM20091961995_33GT	GACTTCAGTTCTCATTTGAATGGTGTTTCCTC[G/T]GACAAATCGTTGCAGTTAAGCGGGCAGGTGTTAAGAAGCGCGGTTTGG
RM20091961996_40CT	TTTGGGACCTTTGCACTGCACTGGTGGCTGTTGTCATAC[C/T]AAACTCTAAATCTCTGCTCCATCAATCACTGGCTGTTGGGG
RM20091961999_61AT	CTCCGCTCCCGTCTCTAACTCTGACAGAAACTCCTGCTGGAAGCTGTGGCCAATCAGCAG[A/T]GTCTCCGGGCCCAGGTGCCT
RM20091962000_13CT	TTGGGAATTATG[C/T]GGTTATAGTACATTGTAAGACTTGTCTCTCATCTCTATTTGCTCCAACTGTTCATAACTGTTCTCTAC
RM20091962001_62CT	GGGTACCACATGAGGGAGGAGGATGTCTTCCCTGTAACATTGAGATTGACGACAATGACAA[C/T]AAGCTCAGTCCGATGATGC
RM20091962002_63AG	ACCCTTCACTGTGGAGCGGGCTTTGGGAATGGTCAATAACAGTCTAGACTCCATGTTGACCA[A/G]TGGCCTCTCTGTTAAGAA
RM20091962003_57AC	CAGATTTATCTGAACCGGACTCTGCTCACCCTGGTGTCCAGCCAGCATGTGCTGCC[A/C]TTTGACGATAACATCTGCCTCCGC
RM20091962005_65AC	AAGCTGGAGAAAGTTCACTGAGGAGGTTCCCAGGGGTCACAGGAAGATCAGCAAGTAAAGAGAC[A/C]GAATGAAACCGGTTTA
RM20091962006_13AG	GAGGCAGTGAAG[A/G]TCTTCAACTCTCTGCAGGAGATGGAGTCTGTGTCTGACCCCGTGCCGATCATCCAGGGCATCCTCCAG
RM20091962007_27AC	GGGGGCACCAGAGGGCGCCGCTGTGC[A/C]ATTGAAGCAGACATGAAGATGAAGAAATAACCGGAGTCAAAAGGCAGTAGGGTG
RM20091962008_79CT	CATTGGGATTGTGAGAGATGGTTAAAAGCTCAACTACAATACAATACCAGATGTTGAGGAGGAGAAACATTTTTGTTT[C/T]AG
RM20091962009_46CT	GGGTACCACATGAGGAAGGAGAATGTCTTCTTCCCTGTAACACAT[C/T]GTGTTGAGATTGCCTGCAATGACAAGTTCAGTCTG
RM20091962010_5CT	CATC[C/T]TGACATGACGTTCCATGATGACAATGACACCAGCCATACTGCTTGTTCTGTGTGTGATTTTCTGCAAGACAGGAAT
RM20091962011_16CT	TGCTACTGCATTTTT[C/T]CCTATAAAGTATGTACTTTAAAAGACATACAGATTGTCTACTGTGTGCATATGTGTCTGCATAGA
RM20091962012_48GT	GATAGGCTAGTCTAGTGGATTTACAGGATTCAGTACATATGATATGC[G/T]TCATCCAGGAACTCCTGGTCAGCAGAAAACATC
RM20091962014_54AC	TGACAGACACTGCAGACATGCTGAATCATTCTGTCTTTTCATGATAGCAGCAA[A/C]ATACTTGTGTTCCTCTTCAGGATCTCC
RM20091962015_4CT	CTG[C/T]CGGTCCCAACAGAGATCTTTGCAGTGTTGTCTGCATTTTTCATGCTGCAGGCAGGAGCGAGCGGTCAGACAGACGAC
RM20091962016_76GT	AGGACTAGGCCCTTTCAGGACTTAACCCCCAAAGAAATCCAGGTGCGGCTATACAAAAGGCTGCCCCTCTCAAAC[G/T]GATTG
RM20091962017_1GT	[G/T]GCCAGCAGCTGAGAGGGAGAGACAAGAACATGAAATCCTAACTAATGTACGGCTGTATAAGCTTTGACATTTAGGGGTTG
RM20091962019_65AG	AGAGTCAGGTTTTCCTCCCTCTGGCACAGTAACTCAAATTTGTCCAGGCTGCAAACAGAACAGC[A/G]GGAAAGAAGCAGTAAG
RM20091962020_4CT	CAC[C/T]TTCTGCTCCAGATCCATCTTCATCTCTGCCTCCTCGTAGGGAGCTGCGCCTCCTTGCACCATCCTAGAGTGCCTCTT
RM20091962021_63CT	GCAGGCATGAAGGTGTGGGTGCTGACGGGGGACAAGATGGAGACGGCCAAGTCCACGTGCTA[C/T]GCCTGCCGGCTGTTCCAG
RM20091962022_26GT	GAGTGCAATGCACACTCACATGGGG[G/T]CAGAGGGGCAGGCGAGGGGGAATGTTCCAAGATAAAACAATGAGAAAGTAGCTAG
RM20091962023_33AG	CCTCTCATCCTGGCGGTGTTATTATCTTAACC[A/G]CTACAGGGCTTCTCATCTCAGCAGACACTCTGCAGCACCAACCCACTA
RM20091962024_55CT	TTCCTCCAGCCGGTCTTTGTCCTTGCAGAGTGAGATGTAGCACTCCTGCACTGC[C/T]ACCATCTCTCCATTCACCTCACACAG
RM20091962025_59AG	ATGACCACCGCTCTTGGGGAAAAGGTTGAATTGTTTACCTCTAAACTAGTTGATTTGG[A/G]GGGCCGCAGAAGGAGATCGAAC
RM20091962028_66AC	CTGTACAGACAGCCCAGAGAGTTTGAGTGGTGGAACTCATTCACTCAGTGTGGTATCTCTCTCCA[A/C]CTTCTGCTCTTTTTC
RM20091962029_57CT	CCAGATCTTTTTGCATTGATCATTTTGTGTCATCATGCAGGCCAATAACAGTATCC[C/T]TTCCTTACCATCTCTCCTAATGTT
RM20091962030_21AG	AGAATTAGGCCAATATCCAC[A/G]GATAATAAAAACATCTCAAATACAGTGACCACCTCACTTATCATTCCCCAACCATGCAAT
RM20091962031_66AG	GCAACCCAAATAACGTGAGCTGAATTTTATGTGTGAGCAAATCCTTCATAAATGGGAAGTACCTC[A/G]ATAGGAGCAAGAGAC
RM20091962032_52CT	AAAGGGTTAGTTGATTGTTGAACGTCCTGTCAAAATAAAAATAAATTAACA[C/T]ACTGATTTTGAACGTCAATGGATGGTTTG
RM20091962034_75CT	AAGGAACAGTTATCAGAGGACCTGAATGCAATGGAGCGGTCCTTCTCAGATCTCTTCAAGAGACTAGACAAATA[C/T]AAAGAG
RM20091962035_10AC	GGAGAGTAA[A/C]TGATTAATTCTGACAGCGCACATTTTAACATGTTAAAAAGGATAAATAAGGAGGCACGCAGCTCTAGCTTC
RM20091962036_26CT	CATCCTGACATGACCCTGACATGAC[C/T]CATCCTGGCATGACAATGCCACCAGCCGTACTGCTCGTTCTTTACCTGATTTCTT
RM20091962037_43GT	TCAGAGAGGAGTATAGCAGGAAAGGAGACCTACACCTACAAG[G/T]GTCAGAGAGGAGTGTAGCACGACAGGAGACCTATACCT
RM20091962038_69AG	ATATGACACTCGGTCCATCCCTGCCTCTCCACTGTTGTTCATTGTACTGTTGGACTGGAAGTGTAAAG[A/G]AAAAAACGTATG
RM20091962040_77AG	GGGTCAGTGAGACAGAAGATAGTTGGCAGGACTGATTGACTTACAGGAGAATGACTTACAGGAGCAGTTAGAGTCA[A/G]CCCA
RM20091962041_6CT	CCTCC[C/T]CCTCAACTGTTCTCCTATCTTGTCTTCAAAGCCACAATGCTTCACAGGAAAGGTTGCATTCAAGGAACCCCCTTC
RM20091962042_3AT	TA[A/T]TGAGCAGGCAGTAAGACATGTCATACGCATGCATGACTCCTTAATAACGTCTAGACTCATTATGATCCTGACAAAATA
RM20091962043_13CT	AACAATGTGCAC[C/T]AGTTCCCCTTCTGGTCTGGAGAAACAGCTGTAACAAGGCTGTGCTTGTGTTGAATTCAGTCAGGACCA
RM20091962046_71CT	AATTAATCTATCTATTAATATAGTAGTAATTTATCTAGCAATCAATCAAGTCTGTGACAGGCATCAGGGA[C/T]ACAAACATTG
RM20091962048_37CT	ATACCATGCACTAGGGACACAATAACTAAAGCCAAT[C/T]TTCCCGGACTCCGTGGAGACTTCTAGAGAGCGAGTCGGGTGGTG
RM20091962049_34AG	AGGGATTAGGGTTTGGTGCAGGTCAGGGATTAG[A/G]GTTTGGTGCAGGTCAGGGATTAGGGTTTGGTGCAGGTCAGGGATTAG
RM20091962050_47AC	TCTGCTAGCTGTTTGAATCCCCATACAGCTTTTGAAAGTGAAGGGT[A/C]TGAGTGGTCTGTCTGCCCACACAGGGGATAAAGA
RM20091962051_21CT	GAAACGTCTCCAAAAAGATA[C/T]ACTCTAGGGAGTTAATTATGCTGGGTTCGTCATTACAGTTAAACAATATATTGTGTAGCC
RM20091962052_80CT	GGTGAGGTGCCGGAGGTCCCTCCGCGCCCCCTCTGGACATCAAGGGGTCCCCGGCGTACACTGTATGTTCCATTCTGGA[C/T]T
RM20091962053_18CT	GGGAATACCATGGACAA[C/T]GTTAGTGGAACCTCACTGAGGAAAGAGTTGAGGGTTGTCTGAGGACCCAACACCAGAGCCAGG
RM20091962054_9CG	CAGGAGGA[C/G]ACAATGCATGTCAGTTCTACAAAACCTTTCTGTCGAATAAGGAATCACATCAGCCCCTTCTATAGGCAGGCC
RM20091962055_66AT	AAGTCATGGCGTAGCTACTGTTTCTGCCTCAATACTAACGAATACAGCTTTTCTTCAGTTTCTGC[A/T]CTATGCTATCTGGGA
RM20091962056_63AT	CACAACACCCCCCTCCACCCCACCCCACCCGCCAGGGTGACATGATCGACAGGTGAAGCTTT[A/T]ATAAATGTTCTCCATATA
RM20091962057_6AG	GTTGT[A/G]AGTGATATGGTGTGACTGTAGACCAAACAGAAACTGGACACCCACATCATGAGCCTGTGTGTGTGTAGCACGCCC
RM20091962058_9AC	AAGAAAAG[A/C]GACGTTGAGCAGTTTTCCATATTTGTGAAGGGCATGGTGTGATTCTCTCACAACTAAAAGCTGATGATTGTA
RM20091962059_74AC	GGATCACACTAGTTATTCACATGTCTTGACAGCAGTCAATAAATAGAAATCAGGCTTAAAATAGAAGGAAAAA[A/C]ATAACAC
RM20091962060_75AG	TCTGACCATGTCAAATATGATCTCACTCTCTTCCACCATGTTCAGCTCATGGAAGCTGCTGGTATTCACTTGGG[A/G]AGTCTT
RM20091962061_31CT	CCTCTGGGTGGTGTTGGTCTGTTGCCCTGA[C/T]GAGCGCCGGTGGTGGTCCCCGTTCACATGGTTGACGTGGTTACCGAACAG
RM20091962062_17CG	TTGAGGTGATGAGCAG[C/G]CACTAGGGCTCGCAGACAACACACATACACACACCCCTACACACGTTCTCACTAATGCCAATTT
RM20091962064_26GT	GTTGACAGTGAGAGGACGTTTCTTT[G/T]TTTTGCTGTGTTTATATATACAGACACGCTTACTGTGACTTTTACACATATGTAC
RM20091962065_33CT	AAGATGGATCTGGGCATGGAGGTGGCTTACTA[C/T]AGGTAGGTCTTCTTATGTTCTGGTTAGGCCTTTCTGAGTTCCATAGAG
RM20091962066_60AC	TTATATCACACCATATTCAAATGAAAGCTTTTGGACATAAGAGCAATGTTGAGGGAATC[A/C]TATTTGAGTCAGAAAAACATA
RM20091962067_15AG	GACGTTACTAGGGG[A/G]GGATGGGGGGTGACGCTGTTAGGGAGAGAGGGGAGAGACCAACGGAAGTCCATTTAGTTATTTGCT
RM20091962069_66AC	TTAGTCACCATAAGAAGTTTGTAAGAAGCTTGAGAGGACACCTGGGACACCAAGAAAATACATGT[A/C]TCTGTTAGCATCAGA
RM20091962071_76AG	AAACCTGGAACGCTGGCAGAACCCACATCAGCCTTTAAAGCCCCCTTTAAACTGTTTGAAGTTTTGATTATCAAT[A/G]CCATA
RM20091962072_10AG	GGCAGAGGC[A/G]TGGAGGGGTGCAGCGGCCTGTCTGTGTGTGCTTGTGTTGGCAGGCATCCCACTCAGCACACATCCATCTAT
RM20091962073_64CT	GTTTGAAAACAATATTTCAATATTAAAGTCATGCAATCCAAATAATAACAATAGTAGGTACCA[C/T]GATGCAACCCGTTAAGC
RM20091962074_27CT	GGAGCTGAGGGCGAGCAGTCATTTAC[C/T]TTACACTGCATCTGGCCCGCGCTCTGGACCACACAGCTCATCCAGATGCCCTCC
RM20091962075_68AG	TGAAATATGCTTTTCTCCTTGTTTACGGAGGTGCTATCCTCAGATAATAGCATTGTTTGCTTTCGCC[A/G]ACAATCCCTTTTG
RM20091962076_52AT	CCTGCGGTGAGATACAAAGCCATCACATTTATCATCGTGGAACAGCGGGGC[A/T]TTGACTTTCTTTGAGTATTGTCAGTGTGT
RM20091962077_42CT	GACAGCGTGACGGAGCTGGTCCAAGTCTGGTGGGTCTGTCA[C/T]GGCCAGTTCCTACTATCAAGGCACAAGGTGAGACCCATA
RM20091962078_43AC	CACACACATGCATATAAATACACAGGCACACAAACTGTTGAT[A/C]ATTTGTCCTCAAGCTTGCACGCTCAGAGACACATACCA
RM20091962079_40AG	CAGGAAGTTTAATCAGATGGCCAGAGAGGCGGTGGGTCC[A/G]TGGCAGGGGGCTCCTGGTCTTGTTCATGGTGGCCCAGGCCT
RM20091962080_9CT	GGACACAG[C/T]TTCTGTCAGGCTCAGGTAGGAGTCAGACACACCCCTCCACCTAACACTGGCATCACAGTCACAGGATCCATG
RM20091962081_57CG	AGAACTGAAACCTGACCCACTTCACACAATGGGTATTACCCACACATTGAATTGAT[C/G]TCCGCAACCTACCCTCAAATTGAA
RM20091962082_49AC	CATCCTGAAATGACCCTCAAAAGCATGACAATGCCACCAGCCATACTG[A/C]TCATTCTGTGTGTGTTTTCCTGCATTTCCTCC
RM20091962083_35CT	CCCTTTGGGACAATGCTCAGTCAGCAGAAAGAGC[C/T]GTGGAGGTTCCAGACAAGCACCAATGAAGCTGCAGATGTTTTGGGT
RM20091962085_31AG	AGTGGGGAAGAGCATGGTAAGATGAAGCTG[A/G]CCGGCTGTAGACCTATAGTCATTAATCCTCTACTCAGGTAACTTGGGTTC
RM20091962086_65AG	TGCAGGTGAGAACACACTCCATGAAGCAGTTTTGAGGTACAGTTAAGTCAATAGGGGTTGACCT[A/G]TAAAAACACTTTCCTA
RM20091962087_76AC	AAAGCGCCGTACGTGGCCGTGGAAACTTCAGATGCTAGTAATGGTAAGGTGACGGAATGATTTGATATCTATTTT[A/C]ATTCA
RM20091962088_19CT	ATCCCGTCCCCAACATCA[C/T]GCTATTAAGAGATAGAGACAGAAACCTGCTGCAGGCCGGAGATGCGGTCTCATTTGTCAAAC
RM20091962089_38CT	CCTACCACGGTGCTTCTGACAGTGCAGACCATGTGCT[C/T]GAAAAACTATTTACAGCATGCCAGAGCCTACTCTCTCCTGTCA
RM20091962091_4AG	GGA[A/G]GAAAGCACATGGACGTCAGTACGTTGAGTTCAATGGAAACAAACAGAAACACACAGAGTTATCAACAGAATGGACTT
RM20091962092_40GT	ACCTGCAAAAATACACATGTCACTGGATAGATCTAATCC[G/T]CCATTACACTTTACAGGCTGTGATTATTTTGGTTTTGATGT
RM20091962094_2AG	A[A/G]GAGGGGGTGGAAGGTCCTTTAGTGTTTGGTCAATCAAGCACCATCTGTAAAGATTAGGAGAGAAATTGACAGTGTGTGT
RM20091962095_36CT	ATGATACACACATATCGTTAGGTATAACACATCAG[C/T]ATATCATCTGCATGCAGACACACACACAGGGAGTCAGCTCATACT
RM20091962096_34AG	ATAGGGTTGACATGGTTTCTGTGGATTTTTGGC[A/G]TATGGCTGTCACTCATTGTGAATATTATGTATTGTACAATGGCGGTG
RM20091962097_7AC	AGCCAC[A/C]ATATTTCATATTTTCTTGTTCAGATAGATAATAGGAAGAGGGCAATACCTTTCGACGTTTCATTTCTTAGGATT
RM20091962098_17AC	ATGAGAAGAGGTAGTA[A/C]ATCTTACCAAGCAGGAGGCTGGCAGTCAGAGAGGCACGCTTGGCTAACATTCTGCATTCAGACA
RM20091962100_69CT	GACCCCCTGGTCCTGAGATGGAGTACTGTACAGACCGCGAGTCCTACTCCCTTGCCGCTGGGCTGGCC[C/T]TGGGCATGGTCT
RM20091962101_54GT	TGTAATAAGTAGTGATTAGACTGGCACTGATGTCTAGTCTAACAGTCAGCACA[G/T]GAAGGAGCCAACATCAGGATTACCCCT
RM20091962102_45AC	GAGAAATATGGTGAAATTGAATGGTCTTAGGGAGAATAAAGTAG[A/C]CGGCACAAATCAAAAGTTTGATTGATGGCCCTATGT
RM20091962103_40CT	GGGTACCACATGAGGGAGGGATTGGTCTTCCCTGTAACG[C/T]GCAGCGTTGATATTGCCTGCAATGACAACAAGCTCAGTCCG
RM20091962104_3GT	AG[G/T]TTCACAGTGTGACGACTAGGACTATATTTTACACTGTTCATGTAAGACTTTGTCTATGACTTTGTCTATGACTTTGTC
RM20091962105_59AG	GATTGTAATAGCTCTGATGACAGACATGTAGGACCAGCTGGGACAGTTTAACCCCTGT[A/G]CAGAACAGGTCCCTCACACACA
RM20091962106_30CT	GACACACTGAGCGAGCTGCTGGCCCGTGA[C/T]GACGCCCCCCTCGACGGTCCCCAGGGGGCGAAGGGCTACCGGGCCTGGCCT
RM20091962107_71CT	ACTCCACTATCCTCCCTCGCGCATGCTTGACCGGCTGGGCACGCTCAGTCACACTCAACTCAATAACGAA[C/T]AAATGAGTCT
RM20091962108_7AG	CTGAAA[A/G]GCAGTCTGGAGCTCTTCAACAGCCTGAACCAGAGAAGAAACACATCAATATATGACTGTATCATCTGCATATAG
RM20091962109_75AT	TGACTGCAGCAGCACACTAGCATGAGCAAATACAGGATGTTCCTTCAAAGATACACTATGCAGAAATGGTAATT[A/T]CCTGGT
RM20091962111_77AC	GTTCCTGCACTTCATCTTTAGCCGACGTTGTCAGCTATCATTCACCAGCACGATTAGAGAGAGACCTGTGCCCAAT[A/C]CATG
RM20091962112_37AT	CTTGGAAGTAAAACTTGAAAAGGGAACAGCACTAAA[A/T]TACTATGCTACTGGCATTATTTTACAAAATTATTCTTGCTGCTT
RM20091962113_77CT	TTCTCTGATCTAAGGATTTCAGGGCTTTATGTTCCTACCTACCACCTGCACTGAGAATGGCAAAAAGCTAAAAGTT[C/T]GACC
RM20091962114_50AC	ATACACATCCCTCTATGACACCCTCTACCCTAACCCCCCGATACTAAGG[A/C]AAACCATCCTCAGCTCTGCTCAACTTAACAC
RM20091962116_21GT	GCAAGATGCTATTGGTTATT[G/T]CTCTGTCTAACATTCCTCTGAGATTGTGTTGTAGGTTTTGGGAAAGTCATGTGTCGACCA
RM20091962117_61AG	TGACAGAGAGAAGAGCAGCTAGCTACAGAGTAGGTCTGACTGAGAGATGAGCAGCAACCT[A/G]CAGAGAAGGTCTGACTGAGA
RM20091962118_4AG	CGC[A/G]ACGTCCCACTTCAGAGCCGGATACACTAGATTGGTGTCTGTTAAAACCAATGGTTCCTGGAAACAAAAAAAGTAGGA
RM20091962119_74AG	AACTTCACCCTCCACGGGCACCGGCAGCTGGTGGACACCTCATGTCCAGGAGACGCCCTCTACTCAGAGATCA[A/G]GGGCTGG
RM20091962122_15CT	TACTCTGAGGTCTG[C/T]GATGGGCTTCAGGCCTGGTCGCCTCTTCAACTGGCTGTTCACCCACAACACATAGGTTGATAGCTG
RM20091962124_51AG	GGGTACCACATGAGGGAGGAGGATGTCTTCCCTGTAACGCACAGCGTTGA[A/G]ATTGCCTGCAATGACAACAAGCTTCCAATG
RM20091962125_51AT	TTTGTAGTTTTGAACGATGTCTACTTTGATGCTAATTATAATTTTAGAAT[A/T]TAAGTATAAATAGAGCCGACTATATTGATA
RM20091962126_29AG	GGGGGTCAGTTGACACAGGAGGATGCCA[A/G]ATGGTTTTTGTCTGGGATAATAGACAGTCTTTTTCACCGCACATTCACATTA
RM20091962127_24AG	AGGGCATTTAATGGAAAGTGTCC[A/G]TTTTGGATAACAACAAAAAATTGCCTAAAATGTTCAACCTTGTACAGTATGCCAGCG
RM20091962128_13CG	CTTGTCGTCAAG[C/G]GGTCGTAGTTTGGCCTGTATGTGGTATCTGGGGCGTGTTTGGGAGGCGGGGTCTGTGGCTCCACTGAA
RM20091962129_42AT	TACAGGGTGTGCAGGCTTTTGTTCCAGCCCTTCAGTGTGTT[A/T]TTTTTGATTCAGTTGGTTCTATTTGTTCTTCCTATTTCT
RM20091962130_21GT	ACAAGAGAAGAGTAGTGAGG[G/T]AATGGACGACGGATGACAACAATAGATATTCTTTACAATGACCTTTCCCCTGTGCACCGG
RM20091962133_20CT	TGCCAATGTGCTGACACAA[C/T]AACAGAGCTTGCTGTATGTTTTTTAGCCATTGGGGGCAGCAGAGCAAGCTGGCAGAAACAG
RM20091962134_21CG	GTGTTTTTAAGACAGAGAGG[C/G]GAAGGGAATGCACTGACTGGGATGTTGTTTCAGTTGAGCCCATCTCATCTGGTTTCAATC
RM20091962135_68AG	AAAGTCCACGTGGAAAATAACCTGAAGGGTGAGACACACACATACAGAGCGAGAGGGAGAAACACAC[A/G]TTTACATTTGAGT
RM20091962136_75AG	TGTAATGGAGGCTAAACGCACAGAAACAACTTTTTATTTTGTTGAAAGCATTTACACATTTATTCCGCAACGTT[A/G]GCGTTG
RM20091962137_34AT	AATACAAACAGGAGTCCTACAGAGGAGTAGGCA[A/T]AACTTCTGACAGTTATCAACATTAGTCCTGCACAATTCCTTCACAGA
RM20091962138_57AG	ATATCCTTTCTGCTCCTGTGATGCGTTTACGTTAACCCCTCTCTGTGCCACACGTC[A/G]GATGTGTGGGTACAGGGGCAGGTG
RM20091962139_60GT	AATGAACTAAGGAGAACTGAGGGTGGATTAACATCAGTTTGGGATCTAATACTTTCTCT[G/T]TTAAACTAACATGAGCCCATC
RM20091962142_18AC	TTTGTGGAGTTTGGCGT[A/C]AAAAAAAACACAGCATCTTCTTTAATACTGAAGTCGGAAGTCAGAGATTTCCGAGTACACAGT
RM20091962144_61CT	ACAGAATAGAATACAAGCTGTCTCAATTAAAACCTGCATGTGTGTATAGTGGAACTCACA[C/T]TAAGTGCCCTTCAAGCCTTC
RM20091962145_18CG	TGAGATGTCATCAGATA[C/G]CAGGTCCTTCTTTATGGCTCTCGTTGTGTCTAAAATGGCTGCTATCTCTCTGTTCATATCATC
RM20091962146_20CT	CTCTACGGCCAGCCTTGTC[C/T]TGGTGCCGCCCGCCAGGTCCTTCCTTGGTTTCCATGGGTACCTGGGGCTCCGTGGCTTCAT
RM20091962147_8AT	GCGCAGG[A/T]GGATGGAGACCCAACATGAGAAACCTTGATGCAAGGGTAAGAAAATATTTACTTTTATGTCAGACCATATTGG
RM20091962148_37AG	ACTGTAATCTGTAGTTGATACACTTGTGGTTTAGGT[A/G]CTATATCTAATCTGAGGTAAACTTTAGTTAAAGATGGAAATGAG
RM20091962149_45CT	GAACACAAACACCAGTGTACAGCACGCTGAGGCACAAATCAATA[C/T]TTAACATACCGCTGGGACTAGTAGTAACCATTACAT
RM20091962150_23CT	CAGCCATCCACTGTGGCAACAT[C/T]CTTTGATTGAATGTTCATCTAACTAGAAAACTAGAAACCTTTCTGCGCCCTTACAAAA
RM20091962151_66AG	ACATTATTGATAAGCTACTAATTACGCTTGTTGCAATTTCAGCTGACCTTTCCTGAGAACATCCC[A/G]GATCATTATCAGCTG
RM20091962152_68AT	TTGGCTGGCTGTCACATGCACTTCAGGCAAATTGCCCCTGATCAAGCCCACTGCCCACACAAATGAG[A/T]GCATTGTACATGG
RM20091962153_22GT	GAAACTTTGTAGCTGGGCAGG[G/T]GAAAAGGGGGAATTAATTGTGTTACGTGTTTTTGTTTTTTTGTTAACGCGCCAGACTGG
RM20091962154_22AG	CCTCTCACTGTCTCTCCTGCA[A/G]CAGTCCATTCAGCTGGTGTCAGGTACCTCTCACTGTCTCTCTGTACTGACTGTATTCTC
RM20091962155_19CT	TGGCACTTTAAAGGCCCA[C/T]CTAATATAAAATGTATGGATTGTGCCATATGGACTGGAGCAGTGAGAAAAGGCCGAGGTGGG
RM20091962156_45AG	GTCAGCCAGAGGACTGAACTAGGCCTGGATGTTGTCAGTAATGG[A/G]GTGGCAGTGGACCTGCTTCTCGAGTTCACTGATGAA
RM20091962157_75AG	CATCCTGACATGACCCTCCAGCATGACACTGCCACGAGCCATACTGCTCATTTGTGCATGATTTCCTGCAAGAC[A/G]AGAATG
RM20091962158_41AT	CTAAGAATCCTATTTCATAATGGTCCAGCGGACTATGAAT[A/T]AACCTTAACAGTGTAACAGCTTCTGTGTTCCGTTCTGTTT
RM20091962159_56AC	CAGAAATGTAAAGGCTCACTGTTTATCTGAGACTGTCAGTCTCACAGAACTAGCT[A/C]AATTAGAGTATGTCTGCGATTGTGG
RM20091962161_81AG	GCAGCGAGGGCGGGACAGACCACCTACACTGGAGTCACGGACTGCTTCAGGAAAATCATGCATGAGGAGGGATTCAGAGC[A/G]
RM20091962162_35AC	CAAAGCTTGTCTTGTTTTTGTAAATAATAATTTT[A/C]TCCATTATTTCTGCCCTTGTGCTTTTTTGGCAGAACACTCACAAAC
RM20091962164_57AG	GACAGTCCACAGAGCATAAGTCCCTTCAGACCTCCCACAGCACACAATGAATACAG[A/G]GAAACACCAATCACTATGCATACC
RM20091962165_19CG	GGCTGCTCCAGACTTCCC[C/G]TCCCTAGTGGCCTCCATGGACCCCTGGAGCCCAGAGACAATACCCCTGGGGGGCCTCACCAC
RM20091962166_42AT	TGGCCCCTCTTCTTTCTCACCGGATCAACTTTCTTCTGCGT[A/T]GGAATGAGTCAGACACCTCCTCCAGGCTAAGACATATAA
RM20091962167_71AG	GCTCCTGCGCGTCACCTCTAGCGGACACTGTCAACTACCGTCCACCAGCGAGATCAGAGACCCCGTGCCC[A/G]ATCCATGATG
RM20091962168_28GT	CTTCTGGAACTTCCTCCGCAGGCTCCG[G/T]CCCACCTTGGGGCTCTGAGTGCTCTTCTTACCTCCCAGCTCCCTCCTCTTGGA
RM20091962169_3CT	TA[C/T]GTTATATTCAATAAAACTTTTTCATAGGCTGCATCATCCCATCGCCTTCTTTGCATGCTCTCTGCGACTCTAGTCTAT
RM20091962170_28AT	AATGTGTGTATAGAATTGTATCCATTT[A/T]GTTTTTTTATATCCAATTCTGGATAAAGTCTCTCATTCTAACCACATGCCTGT
RM20091962172_78CT	GGACTCTGAGATGCGGAGGGAGAGCAGGGGGTGTGGTCTGGGAGAGGTTTTAGGAGGAGGTGGGGTTAGAGAGGTCT[C/T]AGG
RM20091962173_39CG	TTGTAAATGCTAAATTAAAATTCAGCCAAACAGCTGTA[C/G]ACTAAGTTTCAGAGCCTCCCGGAATAGATGACTAGCTCCCTC
RM20091962174_79CT	CTTTCCAATTTGTGACACTCAGTCTATATGCAGTCTATATAACGGAAGAGAACAAGAGATGAAAGATAAATAATTATC[C/T]AC
RM20091962175_66AG	TTTGGATGTTTTACTCCTGCCTTGATTGGATGTTTTTCCCCTGACCACGGAGCTCTGTGATTGGT[A/G]TGTTTTCTAATCAGA
RM20091962176_18AC	AACTTAAACCAGTTTTA[A/C]CAAATATCTATCAGCATGTTAAATGTGCAACCAGAGGGAAAATAAATCTGGACCACCTATACT
RM20091962177_70AG	TCTGTGGATGTACAGTCGTTTGACCTGAAGTGTCTGTCTCTGGGCTCTGGACTGAGGTGAGTCAATAAA[A/G]TTGACCTGAAT
RM20091962178_33AC	TTTACTCAGACCAGGCTGAGAGCTTTGAGCCC[A/C]GCGGGACAGCCTGACCGCAGTGTGGAGGACTACAGACAGACCATTGAG
RM20091962179_26CG	CAGAGGTAAGCACCTGACATTTCCT[C/G]CTTTTGCTCGTTGTAATCCACCATATCCTTGGTTTACTCGACTTAAACAGAGCAG
RM20091962181_21AT	TTTGTCAAAACAGCCAGGAA[A/T]CCACACCTGAAATATGACTCAAGTATGTTCTTGAAGGATATGATATACCAACAGGCATTT
RM20091962182_53CG	GTTGGTTGGAGGCTAGTAGAGGAGACTGGGCGGCCAGCTTGGATTCCCAGAC[C/G]GGTGCAGCCAAGAGCCCAGAGGACGACG
RM20091962183_29CT	GAGTGTTCTAGCCCAGGGAGGGAGGGAG[C/T]GAAACGGCCCCATTATCCAATGTGACTACCCTGAGGGCAACATTCCCGAGCC
RM20091962184_66AG	TGCATGGAGAAGCTCTTGGGCCTGTATCACTATACTTGATCCACGCCTATATTTCATCCCGTCTG[A/G]ACTAATGTAACACCC
RM20091962186_69CT	TTGAGAAAGGCCCGAGTTAAGACAGGAAGAGTCATTTCCCAGAGAGCATCGCTGATGAGAGCAGCTTA[C/T]AGCCACAACGGA
RM20091962187_23CT	TTATAATCAACTGTTTGTAAAC[C/T]ATATTTTGTAGAAATGTGCTGTCTTGGACACTGAATACCTAAAGAGTAAAATATATGT
RM20091962188_9CT	GCCCTCGG[C/T]CGTCAGGTGAACGGTGTTAAGCATGCGGGTGTTAAGAAGCGGTTTGGCGGGCCATGTTTAGGAGGACGTATG
RM20091962191_25AC	AGTACCTCGGTCGACTATTAACTT[A/C]CCCAGCTCCAATGAGTGCGGGCAGTCGATCTCCCCTTGTACGCACGGACAGAGACA
RM20091962192_78GT	GTTGGAATCCAAAGATAGCTGTGTTTCCATGCAACTGTATGGGGAGGACAACATCAATTACATATCTTTGGAAAATA[G/T]AAT
RM20091962193_38AG	AGCTGTCCATCCCCTGTATGAGGCAGCAGGGGGGTTG[A/G]TTACTGGTCTGTCCTTGTGCTGTCTCTCTGTCACACAACACCA
RM20091962195_28CT	CTCAATTATGTTGGGTTGCCGTAGAAA[C/T]GCCACAATCTTGTCGTTGTAGGCTGGGGAGAGACCTGTGTCAATATCAACATG
RM20091962196_60CG	CGTATTCAATTCAGCACCCTTTGTTAAATCCCTTCCCATGATGCTTCAGCTTCAATTGT[C/G]CACAGAAAACAAGGTGCCTTA
RM20091962197_78AG	TTGTCTCGTTGCATCGATAATCTGCTAAATCTAGAACTAGTTACAGTAAAATGCAGGTGTTAGTGTTAAAGGACAGT[A/G]TGC
RM20091962198_43AG	GCTGAGCAGCTGCCGGGCGGCCAGGCTGGGGGAAGCCGGGGA[A/G]GGCGAGGCGGAAGAGGAACCCTGGGTGGGTCGCACCCT
RM20091962199_28CT	TCCGGGTCGCCACAAGGAGTCGCTAGC[C/T]AAGTAAAGCCCCCCCGGCCAAAACCCTCCCCTAACACTGGGCCAATTGTACGC
RM20091962201_48CT	TGATCCTTATCTGTTGATTAAAAACAGTTGAATTCAGCTTGTGTTTT[C/T]CTCTAATTACAGACTGGAAGTACAGCTCAGGGT
RM20091962202_51GT	CTTCATTAGCAGACATCAAAGACCTTCCAGAAAACACAGGGGTCACTAAT[G/T]GTCCAAACAGGGACTTCAATTAAACAATTC
RM20091962203_35GT	AGAGGAGAGGACTGCTGTTTAGATAGAGATGGAG[G/T]GTGAGGGAGGGAGGGAAGGGGGAGATAAGAAGGAAAGAGGGAGATA
RM20091962204_75AC	AAGGAAGAGGCCCCCTGGGGCCTCAGAACTAGAGGTTGTGAAGAGATCAGGACTGTTGAAGGCACAGTGGCTCT[A/C]TCTCTC
RM20091962205_54GT	CTCTCCGGCTCAGATCCGTTCTCAGGGCTCAAGTCAGCCGTTGGTGTAGCCCT[G/T]TTTCCAGTCGCCCTGTACAAAGTGTTA
RM20091962206_9AG	TTCATTGT[A/G]TCACTATAAGGCAGCACAGACAGAGTTGCTTTGACAAACTGTTCCCTGGCATTGTTTCAGAGCAGAGTATGG
RM20091962208_71AC	GGTGGTTGATGGTGGTTGGTGGTTGATGCTGGAGTAAAACGTGCTTTTATAAGCCCATTCATTGCCCAAC[A/C]ATTTCAAATG
RM20091962209_68CT	ACGTGCAGATGTTTAATTTCTCTCTCATGCAGGCGTGGCTGAAGCCAGCGCAAATTCCAACTATTTG[C/T]GTCCAGGTTAAAC
RM20091962210_21AG	GAGGAAAGAGAGAACGAGCA[A/G]GTCAGTGTGAAACTACCACATACTCTATCAGGCTCTACATCCCATTAAGAATGAATCAGA
RM20091962211_45GT	ATAGCAATTTCAATTTAACTACATGATTTGACATACTGAGAAAA[G/T]AGAATTTTGAAATAGAGTGCAATATCATACATTTCA
RM20091962212_33AG	TGTGTGTGTTTCTGTTTTCACGAGGTCATGAA[A/G]GGGACAGTCTTTTCATATGATGTGGTCAATATTCCCACTAGGTGGAGT
RM20091962213_76AC	TTTCTACCACCCACCAGAGGGACTGTACCACCCACCAGAGGGACTCTCTAGTACCAACCGTAGGGACTGCCTCTA[A/C]CCATC
RM20091962214_22CT	GCCCCACTTGAAATTTCCACA[C/T]GGACGTATGGCTGACTGGGGATGTGTTAAGGAAAAGGAAAACAACACCAGGGATAGAAC
RM20091962216_10CG	AGTGTGATT[C/G]CTTTGGCCATAGAGTTCCTGCACTCTGGTTCACCTGCGATTCTGGCCTCTGATTGGGACGATCTCTTCACT
RM20091962217_45CG	CATCCTGACATGACCTTCCTGACCTTCCAGCATGACAATGCCAC[C/G]AGCCATACTGCTCATTCTGTGCGAGATTTCCTGCAA
RM20091962218_68AC	CATTTGGTATGCCAAATACTGGTTCGTCAACTAGGGTCAAATAACCTGTGGCACTTGAGAGCATTTT[A/C]ATTTTTCACTGTT
RM20091962219_57CT	AGTGGTCTGCTGACAGAGGTGGAGCCAATGCGTCTCTTCAGTAACATCCAGGACAT[C/T]GTGCGTCTACACACTGCCCTTTGG
RM20091962220_26CT	AAATCAGTTTGTATCGAGACGAGAT[C/T]GAGACGGAGCTGGAAAACAGCAGGCCAAAGCTCAGAGGGATCTACGCTGCCTATG
RM20091962221_18AT	GACAACTTATTAAATAC[A/T]CCTTATCATTGATCAGGTCCTGGAGGGAGACAACTTATTAAATACTCCTTATCATTGATCAGG
RM20091962222_34GT	AAATTAACTCATCACTGTCCAAGCCTTGCATTG[G/T]TTTTTTGGACTTTGGAATGTGGAATCCAGCGACTCCATTCCGATTCC
RM20091962223_78AG	ATGAACACAGAGCTGCAGGCATTTTAACAGAGGCGTGGGTAATGCCAGCCTTGCAGACTCCATGGAACACTATTATA[A/G]GGC
RM20091962225_3GT	TA[G/T]GGGGTAGAAAAGCTATAGAAATATTTGACTGAATGACAGCATTGAGTGGCAGCACATCAGTGTATAGTCAATGTGATT
RM20091962226_15AG	GGAGACGCTAGCCC[A/G]ATCTCCTCAGACGCAGGCCGAAGTGTTAGCCAAGCCCAGGACACTAGCCCTGCTCAGGAGGGGGAT
RM20091962227_27AG	GCTCTCTCCACCTTCTCCCTGGTGAC[A/G]CGCCTCGAATGTGACCTCTCCTCGCTCCATGCCGTCGTCATGGCGATGCAGGAC
RM20091962228_78AT	CCTATTGTGTGTACTCACCATGAGAGGTTTAGTTTAGGAGTTGGAGGGGAGGCCACTCTCCATAAGAGGTTTAAGAG[A/T]AGG
RM20091962230_81CT	AGTCTGTTTGGCATGGCAGGCCTTCTTCCCGCCAAATACACCACACCCATAATGAGTGGGCAAGGCCTGGCGGGCACGTT[C/T]
RM20091962231_22AG	AGCTGTAAGAGTTCCTGTTCA[A/G]GAAGGGTTCAGGCCACACAACTTGAGAGCTTCTTCTTCTTCGTCTGCTTCATCATCTTC
RM20091962232_62CT	CGGGCACACCTGGGTATAGCCGGGGGAGGGGAGCTGAATGGGGCCTGCATCTCCACCGCAA[C/T]CTCTGACAGGCAGCCAGCG
RM20091962233_56AG	CCTCCTCCAGCGCATGGCGGCCAACGCCAGCCTCTTCTGCTGGGAGCTGATGGAC[A/G]GTAGCACATCCAGGATGGAGCTTCT
RM20091962234_36CT	GGCAAGGAGACTTGCAGCTCGGGTAAAACCATTGA[C/T]AACTGCGTGCCGTTATCAAGGGATTTTTAAATAAGTGTTAACTAT
RM20091962235_41CT	TGTGTTCTTGTTTAGCATGCTGCAAGTGTGTATACATGGT[C/T]TGTGTGTGAACTGCGTAGCTTACCTGACTGGGAGGCCTGG
RM20091962236_34AG	CTTCTTTCTCAGCCACTGGCATCTTGCAGTCAC[A/G]ATGGCAATATGACCAAGGACTCTCTCCTCCCTCTGCAGTCGGAGAAA
RM20091962237_81CT	AAATCCATTTTTCTGTCCAGTGCCAGTGACTTAATGCTTTAGAGTGTGTTTGTGCATGTGTATATTTGTAAATGAGCCGT[C/T]
RM20091962238_33CT	GGAGTGAAAGGAACATTATGAATGTGTGATGC[C/T]ATTGCTACACATTGGTAGGTGAAGAGGTGTTTGTAATGTAAAACACAG
RM20091962239_65GT	GATACTCAGTGCTTATTACTGTTAGATGAATGTGAGGATCTTTTCAAGGTGTTAAAATGTCAGG[G/T]CCTTAATCAGAAATAA
RM20091962240_31AC	GTTTATCTTTTTGTTGCTGTTGATATTGTT[A/C]TTTTGTTTGGTCTCTTCAGGTTTGCCGCCTCTGACAGGGACTGTGACAGT
RM20091962241_59AG	TTAAGTAAAATGTTACCGAAGTGGAATTTGTGGTATTGTGCTTAAGGAGAAATGTATG[A/G]CATCAGCTTTGGTTCTGAAGTC
RM20091962242_35AG	GAGACCTCAAAAGCTTTTACTTCAAGTGAATGAC[A/G]CAAAGGACGACCCTGTTTATTGGTTAAACATTCATTTTGACAAAAA
RM20091962243_78CG	GGTTTTAGATAAAAGGGCCATCCATTTTCATTTCAGAGAAGTCCAATTTTCTCCATTTAACCCTTATTATAAATAAT[C/G]TTC
RM20091962244_30CT	GACCAAGGGTCCCCGGGCCCCAGAGGCCC[C/T]CCTGGGAACACAGGCAAGGACGGGCCCCGCGGCCCCGCTGGAGAACAGGTA
RM20091962245_38AT	GCAGCTTCATCAGGTGCATCTCTTTGTCCAATTCCCT[A/T]ACTGCTGGATAGATGGGATGTTGTTCCATCGCTTCAGATCATA
RM20091962246_50CT	TGTGCAGGGAGACAGCTAGGGTTACCTTGTGGTAGAAGCTGTCTTGGAG[C/T]GTGTTGGTAGGAGCCCCGATGCTACGATACC
RM20091962248_66AG	CTCTGGTTCCAATAGATCCTGCTGGTCCTGGGCGGCCATCTTCTCCTGCTGGGCCCTTCAGACAG[A/G]GGACACAAGCACAAC
RM20091962249_41CT	AGACACCACAAGATGTCTATGGAGGTATGTTACCTCACCC[C/T]GTCATGTATAGTGTGTGTGTGTGTTTGGTATGCCCACATC
RM20091962250_49GT	TTTGGATGTACGACATGTAAAAAGTGTGGGTAATGTGGTGGCTGATGC[G/T]CTTTCCCAATTATTATATTTTCGTTTGGTTGT
RM20091962251_51AG	GTAGGAAGAGGAGCCCGGACGTGGCCGGTTGGTGGGGGTGCGGTCGAGGC[A/G]GGGGCCAGAAGATCCCCAACAAACAAGAGA
RM20091962252_50CG	ATATATACGGTGAAGTCCTCTTGAATATGTATGCAGATGTTAAAATGTA[C/G]TGGGAACACTGTTGAACTTCCACTGAGGTGA
RM20091962253_61AG	ACACAAATGTACATGGTGTAACCAGTTTCTATTCTTTGTTTTCTTTGGTGTAGCAAGCAA[A/G]CATTTTGGGCTTGAAAACAC
RM20091962254_25GT	CCTGACTCCATCTGTGAATCGAAT[G/T]AATTAGTTGCATCACAGATTACTGTGTGGTCTCTCTGTCTGGGTAGATTACTGTGT
RM20091962255_27CT	CTCAGTCTTCGTGGCAACCCCCTAGT[C/T]GTGCGCTTTGTCAAGGAGATGACCTACGACCCCCCATCACTGCTGGAGCTGGCG
RM20091962256_63AG	GAACCGCCCCTGCACTGCAGAGGAGCCGTGACATATCCTACAAAGGTCCATATAGCATGCAC[A/G]ATCGATTTTGTATTTCCA
RM20091962258_15CT	CGTCGTCGGCCCTT[C/T]GTGGAGAGCCTGCGTAGCTATGGCGACTCCCTGATGCTCCTGCCAGCCTTCTCGTACGGCCACAAC
RM20091962259_60CT	TGAAATATGCTTTCTCTTTGTTTACTGTTGTGCTATCAGATAATAGCATCTTATGCTTT[C/T]GCCGAAAAGCATTTTTGAAAT
RM20091962260_81GT	TCAGGAGTTACACTGCTGTGTGCTGGACTGAAGGATCCAAACTGCAAACTGCAGACACTAGGGTACGTGTGTTTGTGCGC[G/T]
RM20091962261_39AT	TCCCTGTGGAGCCACATGCAGCATTGTGTGTGGGTGTG[A/T]TGTCTGATCATGCATGCGTGTTTGTGTGTTAAACTTTTTTTC
RM20091962263_38AG	AACCCTGTGAAAATAGGCTCCAGATAGAACCCCTTTC[A/G]GGTCAGATAGAAGCCTTTTGAGTTCCAAATTGAACCTGGGTTC
RM20091962264_42CT	TCCAACCAAAGCGTCAGCCATCATTGAGGCGGCTAGGTGGC[C/T]CAGTGCGGCCACGGAAAATAAAGGAAAAAGTGAGAAACT
RM20091962265_60AC	AGCATTTTGTTGGACGGTGTATACCATGTGTAATCCCATACAAAGGTCAAATAAAAATA[A/C]AACTTGAAAACACACACACAC
RM20091962267_19AC	CTACCCTCTGCTCCTTGG[A/C]CTGCACTCCGATCCAAGATGGAGAAACACCTTCAGGTCATCTCAGTTCTGCAGTGGGTCATC
RM20091962268_15CG	TTTTTTTCATCTTC[C/G]TACCTTCCTTTTCAATGTTATTTTTGATTGGTCGCTGAAATGGCTTCTAACCAATCAGCCGGCGTC
RM20091962269_14AG	CATTTAAACAGCA[A/G]CATGATAAATTAGCCTGGTTATCTCTTGTGTCCCAACACTGTCAGTGCAAATGAAATAGCAAATTAT
RM20091962272_31CT	AGCATAGATGGGGATTGGAATCTGCTGCAC[C/T]GCTGCCTGCTGGAGGGGAGAAAATAAGGCCTTATAAGGCTTCACAAGGGA
RM20091962274_34AT	GTGGTCTTTGGGCATGAAGAACTGGGTGACCTC[A/T]GAACTGCAGCTCACCACGGGGTCACACCTGAGCAGCTCGCTACAGTA
RM20091962275_78AG	ATGTGTGCTGGAGAGAAGAGACGCCTCGTCGTACCTCCTGCCCTCGCTTACGGCAAGGAGGGGAAAGGTACACACAC[A/G]CAC
RM20091962277_34CG	TTCATCAGGGGGTGGGGGGTGCAGGGTGAGCCC[C/G]GGGCAGGGCCCTGTGCTGTACTCAGGGAAGGGGCTCTCTGTGCGACT
RM20091962278_29AG	AACTTATCTGTTACAGTCATCTCTAATG[A/G]GGAGGTATGTTAACCTGATTAGACAGGATCTGTCCTAATGAACCATAACCCA
RM20091962279_77CT	ACTCCTGATGACAGACACACAGAGGGGCAGTCAAATCTCAGGCCTCTCAACATCAGACATCCACTTTATCCCCTCC[C/T]CTGT
RM20091962280_15GT	TTCACAGTTGGCAA[G/T]CGTAGACTGGTAACTTTTATTATTTATTTGGCGCACGGAAACTAGAGGCCATGAATGACTTGATCC
RM20091962281_28AC	CAGAAAGAGATGAGACAGTCTCAGAAA[A/C]ACAACGTCACACACGAGATAATGCAGTCTCCAACTAACAACATCGTACACTAC
RM20091962282_12AT	TTCTGGCAAAA[A/T]TATACACAATACAAATCATTTTGGACAGATTTGACAGGCAGACACACAAGCATACAAATGATACACAAC
RM20091962283_21CG	GGGTACCACATGAGGGAAGA[C/G]GAGTCTTCCCCGTAACACACAGCATTGAGAATGCCTGCAATGGCAACAAGCTCAGTCCAA
RM20091962284_39AG	AAAAGTGGCCTCCAGAGGCTCAATGCTGGGTGTGCCGA[A/G]TGGCTCAGAAAGGGCCTGTGGAGGTTTGATGGCCAAACATGT
RM20091962285_71CG	CACTTATCTGATACGGTCTCTCTTCTTAAAATCAAACCACTCCGATGACAACCGCAGAGTCAGAGAGAAA[C/G]GTTTCCACCG
RM20091962287_23CG	TTTAAAAAATGGGGAGAGACAG[C/G]CTTTAAACCTAAAGCAAGCCAGTAAGGAACACAGACACACCAACAAGAATTAAGAACA
RM20091962288_40AC	ACAGTATACAGTGCTTCCAATGAGAGACCATCGACACGC[A/C]GATCAGATCGTGACGGTGGGAGTAGATGTGGTCTTAGACTT
RM20091962289_55GT	ATACCTCAAATGCCCAGGGCTTCAAACCCAGACCACAACTGCACGGCTATACCA[G/T]GGTGGCCAGAGAGCAAAGTGTGCCTA
RM20091962291_19CT	TAATGAATATTCAGTCTG[C/T]TCTTTAAGTCTCCGTTTTTGGTAGAAGGCAAAACAATACTTTTTTTCTTTCATTCTTTCTTT
RM20091962292_2GT	G[G/T]CAAAGATTCGAACAGCCAGAGACGCTCTGTGTGAATATCCAACCATCTCTTCATTCCAATCCTCTCTCAGCCAACGACT
RM20091962295_50AC	GTCTGAATACATGAATAACTAAGCAGCAGCAGCCAGCTAATGACCACAG[A/C]ACCTGGCCACAGGGCTCTGCTCTTCCGCCTA
RM20091962296_37AT	TTCAGTGTCCACCTTGATAGAGAACCTCTGTAAACA[A/T]ACTGTTGTCATGTTTGTCTGTTGTCTCGCCATCTGGCATGAAAC
RM20091962298_67CG	GTTGGCTGGAAGCTAACAGAGGAGACTGGGAAGCCATCTTGGATTCCCAGACCCAGACGTGTGCAG[C/G]CAAGAGCCCGGGGG
RM20091962299_77AG	AGTCAAACAGTCAAATATCATACATGTTGATGACAATCAACTCTTTAGGACCATGAGTTTTTCCTGATCAGGTCAT[A/G]TGGT
RM20091962300_34AT	CATTAATTAGCTGTAATTCATGTGGGCTCCGGA[A/T]TCCTAACGACGGAATCATTTGTCTACTCAGTTACACCAGGCTCACTT
RM20091962301_77AG	GAATGAGCAAGGTAGGCTATGACAACGTGAGTGTAGTAAAGGAAACTCAACAAGGCATGGCATAACACCCTGGACT[A/G]GGTT
RM20091962302_9AG	GAGAAGGA[A/G]CGTCTGATGCACTCTGTGAGTGAGAAGGAGGCAGCACTGTCAGCCCTGCGCCATGCTGCACAGCTGCAGCAG
RM20091962303_56CG	GTGTTCTTCCACATCCTGGCACAGAGTGAGGCTGATGGCTGCCAGTTTGTGTTCA[C/G]ACACCCCTGGAGTAGAGCAGGGCTG
RM20091962305_48AG	TTCAGTTTCAGACTAGGACTCCTTGTGGATGACTTCAAGGAGCATCT[A/G]CCTTTGTATTTTGGTGTTTGAAGGCTAAGAAAA
RM20091962306_41CT	GGTGAGACATTTTACGCAAATGGAAAAGACTAACACAGTA[C/T]CTCCCAGATTTCCGGGATAAAATGCCTATCTTGGTGGAAG
RM20091962307_70CT	GACTGGAGGCACGCAAATCACAGATATTCGGAAATAGGACTTGATGGCTTGAAGTACACATACGAAAAC[C/T]GTCTCCAATGC
RM20091962308_4CT	CAC[C/T]GGGGTGGCTAGGATCAGCCTGATTAGAATGGACAGAGAGCAAAGCACGGGGGCCCAGGTAGATTACCTACTGTTTTA
RM20091962309_33CT	TCGAGCTGCTTCTGCCGCGCTAACTCCTCCTT[C/T]TGCCTGGCTAACTCCTCCTTTTGCCTGGCTAACTCCTCCTTCTCTTGC
RM20091962310_66AG	GGGTACAACATAAGGGAGAGCATTGAGATTTCCTCCAATGACAACAAGCTCAGTGCGATGTTGCT[A/G]TGACACACCGCCCCA
RM20091962311_41CT	GCTGGTTGGCAGGTGGGCTTTGGCGTCATTGGGCGAGACA[C/T]TGTAATCTGTCTGATCTAACTGGGAAAGACATGTATTTCA
RM20091962312_54AT	TGGCTTTGAAAGCGCCGTAGGAGATCTGGCGAGCATTTGGAAACAAAGTCAGT[A/T]TGGCTTCCATGGTATTTCCCTTAAAAT
RM20091962313_75AG	ACACACTACTGGAAGTCTACACTACAGCCTCATTGTGGTGAGGCAGGAAAGACAAAGAGAGGCGCACAGAACAC[A/G]GAAAAT
RM20091962314_67AC	GACAGGAGAGAGGTTGCCTGCCTCAAGTTCCTCCTCCTCTTCAATCCCAGTGAGTAAACCACATTG[A/C]CATACGCTGTATGC
RM20091962315_42AC	CTAAAATTGAGTGAATACAAACACAAACTTCAGAGAAGGGG[A/C]GTGACCTCACCCTGCAGCTTGGTATCCATGGTGATGGAC
RM20091962317_41AG	ATTTGGAGGGCAGAGCAATGATCAGAGAGCCTGCGACATT[A/G]GTGATAACCAACGCCACAAGATCAGACTCAGCCAGTTACC
RM20091962318_37AG	GTGGGCTACAGGCAGGCTGTCCTCCTGGAAGGTCTG[A/G]ACAGAGTGGTGCACGCATGGTGATCAAGTCCGGGTTGCTGTTGC
RM20091962319_68AG	TTCTATTCCTTTCTGAATCTGGGTCAATAACAGACGTGTGGCCCCCTGGTATTTCAGCCACACTCTG[A/G]GCCGGAGCATGTG
RM20091962320_41AG	AATGAAGGAGCACTATTGTTTAGACCAGGTGGCTGAAAAC[A/G]CTCCTGACAGCATTTACTTTTTAATGGCCAAGTAGCCTCC
RM20091962321_13AC	CTCATTTACGAC[A/C]TGTCCACCTCTGGATCAGGCTCCGGTCAGTACAGCCACACTAGGGCTCTGATCAATTCAAGCAGTCAC
RM20091962322_57CT	TACCAGCCTGTTTCTGCTTCAAAGCAGCAGAGGTTGATGACATATTGGATCCCTTT[C/T]GTCAAAGTCAGGCTGTTTAATCTG
RM20091962323_17CT	GAATATGGAGAATCTG[C/T]TGATTAGATGATCACATATTCAGTACACATGTTGATGTTGGGTACAGTGAGGTGCAGGCCTCTC
RM20091962324_11CT	CAACACAAGA[C/T]GCAGAAATAAAAATATAATTCATGCCTTACCTTTGACGAGCTTCTTTTGTTGGTGTAACAGTATAACTTT
RM20091962325_72CT	CAACCGTACGGTAAGCATTTAAAATAGCTAGCTAACTATGTATATTGTGCAAGTATTAAATTGTAATCCTG[C/T]TCTGTGGTT
RM20091962327_59AT	ATGAGAGTTCAATAAACATGATATGATGGATGAGCATTTGGTTCCTCTTTTGATGTTT[A/T]ATGCAGCATTTTGTTTAGGTCT
RM20091962328_34CG	AAAGTCTGGGGCCACGGGGTTGTAAACATCCCT[C/G]AGCTCAGCCACAATCTTCTCCTCTGCCCCTGGACAGAACAGACAGAA
RM20091962329_59AC	GAGTTTGCACATTTGTAACCATTCCATTGGTTCCATATTGACATGAGTGCCAGAGGGG[A/C]AGGATTTTCACTTTAGGAACCA
RM20091962330_51CG	CAACACAAAACGCAGAAATATATAAATCATGCCTTACCTTTGACGAGCTC[C/G]TTTTGTTGGCACTCCAATATGTCCCATAAA
RM20091962331_13AG	AAGCGTAAATAT[A/G]TGGAGTGAAGAAGGGAAAGGTAAATATGGAAATACATAAGCAGTAAGGTACAAGGGGTTGTGCTATAT
RM20091962332_22AG	TGTGTGTGTGAGTGAGTAGGA[A/G]AGGTTAGTGACTCCGCCAGGCAGGGTGTAATTAGCCAGAGTGGCGTGTGTGTGTGTAGC
RM20091962333_33AG	ACCGCAGTTATCTCTGCAGGGTAAGCCACATT[A/G]AGTAGATGTGGATCATTGGACACGTGACAGGGATGGTATTGGTTTACA
RM20091962334_63AT	CCCAACCCACCACTAGGAGTCACAAAATCGCGATGAGCCAAATAAAGCCCCCCCATTTTTTT[A/T]AAATCAGAGAACAGTACA
RM20091962335_71AG	GGAAGATGGAGGAGTTACTAATAAATTGCTAGATGTCTGGTTGGCTTTGTTAAGTACAGTTAAAAAGCAA[A/G]GTGCTGAAAG
RM20091962338_15AG	TGTGCATGCAGTTA[A/G]CCACCACTGATTTCTCTTGGAATAAACTCAAGCTTACTCTTGCTGAATGTAAAATACAGTATCTTA
RM20091962340_79AG	TGTTATCAATGGCAGAGCAACTTTTCAGCCACCATACTGTGGAGACATTAAAGCACAGCTCCTTGTCCTCCCAAAGTG[A/G]TC
RM20091962341_46AG	CATCCTGACATGACCCTGCTGCATGACAATGATACCAGCCATACC[A/G]ATCATTATGTGAGTGATTTCCTGTAAGACAGGAAT
RM20091962342_59AG	GGAGCAGTGTACTGCGTCAAAGCCCAGGCCCATCTGGACACCCACAGCAAAAGCAGCA[A/G]CACTGACACACAGTGTGTCTCC
RM20091962343_64AC	ACAGGTTGCTGTACTGAGAGGACTACAGGGGACAGGTTGCTGTACTGAGAGGACTACAGGGGA[A/C]AGGTTGCTGTACTGATA
RM20091962345_24AC	TTGCTTCAGAGACGACCCAGAAG[A/C]ATGTATTATAAAAGGCAGTGACTCAACCTACACAACCTTTGACCTTGAGAGTGAACC
RM20091962346_30AC	GGGATGGAGACAACTCAGGCAGACTGATT[A/C]GAGATAAGGGAATGTACTACACTATATTGGCTGCAGGTGACACATCATCAT
RM20091962347_46CG	GAACAGCTTGAAAGGAAACACTTTATAGAGGTCAGTTACAGTTGA[C/G]TATAAACACATTTAGTATTTGTTTCCTGCTGCAAA
RM20091962348_62AT	AACAATTAGAGGTTATCATCATGATGATAATTTGGGTTGAATCAAGCTTGTTATTTCCCCT[A/T]TGGATCCTGTGGCGAGAAA
RM20091962349_53AG	ATTAGGTCAGCAGTGAGCAGCCAGCAGCTGAGAAGGAAGTGTGTTGTCTCAA[A/G]GAGGGGAGAAGACGGAGAGGAACCTAGA
RM20091962350_5CG	GCCT[C/G]GTGGCTGAGTCCTGTGACAGCTTGATGTATTGATATCCAGCTCACCGAGAAACCATCATCACCACTGGCCTGGCAC
RM20091962351_17CT	TCAGTCATATGCTTTA[C/T]ATCCTGTAGTCCTGACCAGCTCCTTTTATTGTGAATTGATACCTAGCTGGGCTCTCATTGGTTA
RM20091962352_24AG	TTTCCTGACAACACAGTGAAAAA[A/G]GGGAACGTCAACCCACCCATGACCCGTCATCCATTCGTCAACTCTACATCGCCACGC
RM20091962353_75AC	GAACCGCCCCTGCAATGCAGAGGAGGGGCCGTGACAACCACAACAGAGCATGACAATGAATGAGAGCCTGCTTA[A/C]ATCCAA
RM20091962354_50AC	GCATTTGATCCAAATGATATGGACCCTGATTTAACTTTCATTGTTAATT[A/C]GTTTATTTTTAATGGAAGATTCTTTATCTGT
RM20091962355_40CT	ACATCAGAGCACAACATTCTTCGATATTCTCTCATTGGG[C/T]ACAGTAAACATATTATTTCCGGAGTTATTCTTATGACCAGA
RM20091962356_72CT	GCAAAGTCATTTTTTGTCAGACAAATCATTGGGTCGAAACTACAGAACAATACAAAACAAGAGAACACACA[C/T]GGTTAATGT
RM20091962357_25CT	GCAATGTTTTTATGTAGGCTATTT[C/T]GTTTCCTTCTGGTTATCTAGATCTCTGGTGCCCTCGAGGCATGTCTTATATCAAAC
RM20091962358_11AT	CAACCGCCCC[A/T]GCAATGCAGAGGAGGAGCCGTGACACAACCTTTAAGTATTTATTGAAAACCCATCTCTTCAGTAGGTCCT
RM20091962359_33AG	CTCCCATGTTTTTTGTTGTTGTTCATGTTTAG[A/G]GCCTATTTAGACACATAACGAAGAAATTAGTGGTTTGATTTAGATAAT
RM20091962360_57CT	ATGGCCTCTGTGTGTGTGCTGCCCTCCATGTGTGTCCACCTCCACCATCACCCCTT[C/T]CCCATCTGTAAGCCCCACCCCGTC
RM20091962361_15AG	CTGAGCCGATGCAG[A/G]CCGCTCTTTTAAAGCAGAACAAAGTGTGTCCCAGAAGATTGTACATAATGGATGAGTTAGTGAAGA
RM20091962362_17AG	CCACAGGCTAATTTGT[A/G]GCTGATGTGTTGCTGGGGAAGCACAGCTTTGTCCAACCCAGTGGAGAGTAACAGTCCATTCAGG
RM20091962363_16AG	TATGTGTGGGTTAGC[A/G]TAGCATGGAGGCTAACCTCTGGGAGCCTCATCATCAGCCAGCTAACGCTAGGGCCTGGAAGTTAT
RM20091962364_53AC	GGATACCGTATGAGGGAGGAGTATGTCTTCCCTGTAATGCCTGCAATGACAA[A/C]AAGCACAGTCTAATGAGGCTGTGACACA
RM20091962365_57AG	GTAAGCACAGCAAAACCCAGGAGACAGAGCAGGGAGGGGGCGTCACAGATATGATT[A/G]CATTTTGCAACCCTGCTCTCCTCG
RM20091962366_59CT	ACCCGCACATGGCCACTCACAAAATAATTTCAGCATCCTAACCCCAACAGAGCACTTG[C/T]GCATCCGCAATTTGATGAATGG
RM20091962368_76GT	GAGAAGGAGAAGGTGACGCAGGCCAACGGTATCATCCTGCAGATGAAGAGGGAACAGCAGGCTCCTCCTGCTCAA[G/T]AGGCT
RM20091962369_45AT	GCCCAACCAGTGTGTGTGTGTGAGAGAGAAACAGCCAGTCAGCT[A/T]CTCATCCAGATGTCAGTTCTAAACTGCTATATGAGC
RM20091962371_3CT	GA[C/T]TGAACACGGGACACAAGTAGTACTCAAACTACACTGCAACTGAATAACTTGCAATCCCAATAATTTGTTTAAAAACTG
RM20091962372_73CT	ATGCTTTTTGGAATGTTGTGTCAAAAAAGCACATATCTTTATTACAGACAGACCTCTCAGCATCTTTACAAC[C/T]ATTGAATC
RM20091962373_9CG	CTGATAAC[C/G]TAGCCCTTCTCCGGTACATGGGTTCTGGCTCACCCGTCATCGATGATTCTCAAGGAAGCTCGGGTGGCTTCG
RM20091962375_59AT	CCCAGCCCACCACAAGGAGTTGCCAGAGCGCAAGGAGGCAAATAAAGCCCCCTCGCCC[A/T]ATGGAACTCCTGGTCACGGCAA
RM20091962376_37AT	TCTGGCAAGGACTGCATTGGCATCGGCAATGTCAGC[A/T]GAGTGTCAGTCTGTATTTCCTCATTATGTTTCCCAGTGGCAGCA
RM20091962377_34CG	TTGCACATGTGGATAGTTAGCTGTCATTTAACT[C/G]ATGTAGGCTAGCTGTCAGAGTAAAATCATGGGCAAGTTTTTACGTTT
RM20091962378_65AG	GGGTACTACATGAGGGAGGAGGATGTCTTCCCTCTTAACGCACAGCGTTGATATTGCCTTCAAC[A/G]ACAACAAGCTCAGTCC
RM20091962379_73CT	GTACATCAACCCCTTTGTGACCTTCCTGGACCAGAGGAGATGGAAGTGTAACCTGTGTTACCGGGTCAACGA[C/T]GGTGAGGA
RM20091962380_64CT	TGAAATATGCTACCCTCTTTGTTGACTGCTGTGCAATCATCAGATAATAGCTTCTTATGCTTT[C/T]GCCGAAAAGCCTTTCTA
RM20091962381_38CT	TATTCACATGCATGCCTGCAAGTGCCTGATTTCCAGC[C/T]AGCCCTGATAAACAAAACGTGATGCCACCCAGCCCAGTTCAGC
RM20091962382_27AG	CCAGCGTGTGTGTTTCACTGTACATA[A/G]TGATGGGCATTCCGGCTCTTTTCAGTGATCCGGCTCGTTCGGCTCAGCTCACCA
RM20091962383_52CT	GTTGGCTAGAGGCTAATAGAGGAGACTGGGCGACCATCTTGGATTCCCAGA[C/T]GGATGCAGCCAAGGCACCAGGGGACATCA
RM20091962384_15AT	GAAATTCCCCTTTA[A/T]TATAGTAATGACTATATGCTGTGGCAGCTTCAGGGTGAAATTTCCCTGTAAGTTCCAAGGCAATAC
RM20091962385_9AC	CAGGACTT[A/C]TCCAGTGAGCAGTGGGCCTGGACCAAGTTATTTCAAAACAACACCTTTCTGATCAACCTTTTTCACAGTGTG
RM20091962386_55CT	TCCACTCTCCATCCAAAAACAAACTCCGCCCTGAGAGCACACTCCTAGAGACTG[C/T]CAGTGTGCCCATCTACCAACGGCTCA
[truncated: 2,947 more rows]

## Sheet: Omy1
	Sex averaged map:			Sex specific maps:
	Theta	Kosambi	cM	Theta Female	Kosambi	cM	Theta Male	Kosambi	cM
RM20091961053			0			0			0
	0.07	7		0.07	7		0	0
RM20091962765			7			7			0
	0.089	9		0.09	9		0	0
RM20091964506			16			16			0
	0.052	5.2		0.05	5.2		0	0
RM20091960967			21.2			21.2			0
	0.033	3.3		0.03	3.3		0	0
RM20091960483			24.5			24.5			0
	0.033	3.3		0.03	3.3		0	0
RM20091965388			27.8			27.8			0
	0.035	3.5		0.03	3.5		0	0
RM20091963708			31.3			31.3			0
	0.054	5.4		0.08	7.9		0.03	2.7
RM20091965296			36.7			39.1			2.7
	0.064	6.4		0.06	5.6		0.05	5.5
RM20091963155			43.1			44.8			8.2
	0.028	2.8		0.02	2.5		0.05	5.5
RM20091964571			45.9			47.2			13.7
	0.011	1.1		0.02	1.7		0	0.4
RM20091963063			47			48.9			14.1
	0.01	1		0.02	1.6		0	0.4
RM20091962010			48			50.5			14.5
	0.034	3.4		0.05	5.5		0	0.4
RM20091964212			51.5			56.1			14.9
	0.017	1.7		0.03	2.8		0	0.4
19NUIG			53.2			58.8			15.2
	0.015	1.5		0.02	2.2		0	0.4
RM20091964197			54.7			61			15.6
	0.028	2.9		0.04	4.1		0	0.4
RM20091965414			57.6			65			16
	0.036	3.6		0.05	5.4		0	0.4
RM20091964824			61.1			70.4			16.4
	0.051	5.1		0.09	8.7		0	0.4
RM20091962862			66.3			79.2			16.8
	0.046	4.6		0.08	8.3		0	0
RM20091964118			70.9			87.5			16.8
	0.014	1.4		0.02	2.1		0	0
RM20091963502			72.3			89.6			16.8
	0.019	1.9		0.03	2.8		0	0
RM20091965354			74.2			92.5			16.8
	0.024	2.4		0.04	3.6		0	0
OMM1205			76.6			96			16.8
	0.004	0.4		0.01	0.6		0	0.2
RM20091962734			77			96.7			17
	0.008	0.8		0.01	1.3		0	0.2
RM20091963909			77.8			98			17.2
	0.014	1.4		0.03	2.7		0	0.2
RM20091962879			79.3			100.7			17.5
	0.016	1.6		0.03	2.5		0.01	0.5
RM20091963568			80.8			103.2			18
	0.006	0.6		0.01	1.3		0	0
RM20091962158			81.4			104.5			18
	0.007	0.7		0.02	1.7		0	0
OMM1302			82.2			106.2			18
	0.014	1.4		0.03	3.2		0	0
RM20091963064			83.5			109.3			18
	0.025	2.5		0.05	5.1		0	0
RM20091963650			86			114.4			18
	0.017	1.7		0.03	3.4		0	0
RM20091962356			87.7			117.8			18
	0.008	0.8		0.02	1.6		0	0
RM20091960723			88.5			119.4			18
	0.008	0.8		0.02	1.5		0	0
RM20091965617			89.3			120.9			18
	0.015	1.5		0.03	3.1		0	0
RM20091961508			90.8			124			18
	0.023	2.3		0.05	4.7		0	0
RM20091963315			93.1			128.7			18
	0.008	0.8		0.02	1.6		0	0
RM20091962382			93.8			130.3			18
	0.015	1.5		0.03	3.1		0	0
RM20091961455			95.4			133.4			18
	0.015	1.5		0.03	3.1		0	0
RM20091961975			96.9			136.4			18
	0.02	2		0.05	4.9		0	0
RM20091965206			98.9			141.3			18
	0.038	3.8		0.08	7.6		0.01	0.6
RM20091961437			102.6			148.9			18.6
	0.014	1.4		0.03	2.5		0.01	0.5
RM20091961645			104.1			151.4			19.1
	0.006	0.6		0.01	0.8		0.01	0.5
RM20091962461			104.7			152.2			19.6
	0.006	0.6		0.01	0.8		0.01	0.5
RM20091965600			105.3			153			20.2
	0.023	2.3		0.04	4		0.01	0.5
RM20091964671			107.6			156.9			20.7
	0.029	2.9		0.04	3.9		0.02	2.1
RM20091962157			110.5			160.8			22.7
	0.023	2.3		0.05	5.4		0	0.2
RM20091960580			112.7			166.2			22.9
	0.013	1.3		0.02	2.3		0	0.2
RM20091964705			114.1			168.5			23.1
	0.02	2		0.03	3.4		0	0.2
RM20091961891			116			171.9			23.3
	0.027	2.7		0.05	5.1		0	0.2
RM20091964500			118.7			177			23.5
	0.034	3.4		0.08	7.8		0	0
RM20091964523			122.1			184.8			23.5
	0.012	1.2		0.02	2.3		0	0
RM20091963143			123.2			187.1			23.5
	0.012	1.2		0.02	2.3		0	0
OMY1032UW			124.4			189.4			23.5
	0.017	1.7		0.03	3		0	0
RM20091965645			126.1			192.5			23.5
	0.007	0.7		0.01	1.2		0	0
RM20091961309			126.8			193.7			23.5
	0.017	1.7		0.03	3		0	0
RM20091964617			128.6			196.7			23.5
	0.022	2.2		0.04	3.9		0	0
RM20091964425			130.8			200.6			23.5
	0.009	0.9		0.01	1.5		0	0
OMM1082			131.7			202.1			23.5
	0.022	2.2		0.04	3.7		0	0
RM20091960927			133.9			205.8			23.5
	0.03	3		0.05	5.1		0	0
RM20091960762			136.8			210.9			23.5
	0.026	2.6		0.04	4.4		0	0
RM20091962235			139.4			215.2			23.5
	0.019	1.9		0.07	7.2		0	0
RM20091960250			141.3			222.5			23.5
	0.027	2.8		0.06	6.4		0	0
RM20091965946			144			228.9			23.5
	0.008	0.8		0.01	0.8		0	0
OMM1776			144.8			229.7			23.5
	0.027	2.7		0.05	5		0.01	0.5
RM20091962691			147.6			234.7			24.1
	0.049	4.9		0.09	9.1		0.01	0.5
OMM1355			152.4			243.8			24.6
	0.033	3.3		0.03	3.3		0	0
RM20091960576			155.7			247.1			24.6
	0.175	18.3		0.17	18.3		0	0
RM20091960534			174			265.4			24.6
There are 67 mar	kers in	unique	map po	sitions.

## Sheet: Omy2
Current map :
	Sex averaged map:			Sex specific maps:
	Theta	Kosambi	cM	Theta Female	Kosambi	cM	Theta Male	Kosambi	cM
RM20091965762			0			0			0
	0.066	6.7		0.07	6.7		0	0
RM20091960977			6.7			6.7			0
	0.05	5		0.05	5		0	0
RM20091964295			11.7			11.7			0
	0.098	9.9		0.1	9.9		0	0
RM20091963506			21.6			21.6			0
	0.078	7.9		0.08	7.9		0	0
RM20091961821			29.5			29.5			0
	0.074	7.5		0.07	7.5		0	0
RM20091962486			37			37			0
	0.077	7.7		0.08	7.7		0	0
RM20091960394			44.7			44.7			0
	0.052	5.2		0.05	5.2		0	0
RM20091962301			49.9			49.9			0
	0.088	8.9		0.09	8.9		0	0
RM20091965115			58.8			58.8			0
	0.097	9.8		0.1	9.8		0	0
RM20091963452			68.6			68.6			0
	0.035	3.5		0.04	3.5		0	0
RM20091962955			72.1			72.1			0
	0.025	2.5		0.02	2.5		0	0
RM20091962042			74.6			74.6			0
	0.016	1.6		0.02	1.6		0	0
RM20091961363			76.2			76.2			0
	0.025	2.5		0.02	2.5		0	0
RM20091962324			78.7			78.7			0
	0.046	4.6		0.05	4.6		0	0
RM20091963746			83.3			83.3			0
	0.046	4.6		0.05	4.6		0	0
RM20091964868			87.9			87.9			0
	0.052	5.2		0.05	4.9		0	0
RM20091965227			93.1			92.9			0
	0.023	2.3		0.05	4.6		0	0
OMM1603			95.4			97.5			0
	0.019	1.9		0.03	3		0	0
RM20091960061			97.4			100.5			0
	0.037	3.7		0.06	5.9		0	0
RM20091962847			101.1			106.4			0
	0.019	1.9		0.03	3		0	0
OMM5203			103			109.4			0
	0.015	1.5		0.03	2.8		0	0
RM20091964136			104.5			112.1			0
	0.015	1.5		0.03	2.8		0	0
RM20091964191			105.9			114.9			0
	0.017	1.7		0.04	3.8		0	0
RM20091963825			107.6			118.7			0
	0.013	1.3		0.03	3.1		0	0
RM20091964945			108.9			121.8			0
	0.02	2		0.04	3.9		0	0
OMM5198			110.9			125.7			0
	0.019	1.9		0.02	2.1		0.01	1
RM20091963251			112.8			127.8			1
	0.013	1.3		0.03	2.7		0	0.1
RM20091963240			114.1			130.4			1.1
	0.008	0.8		0.01	1.5		0	0.1
RM20091964702			114.9			131.9			1.1
	0.011	1.1		0.02	2.2		0	0.1
RM20091964723			116			134.1			1.2
	0.011	1.1		0.02	2.2		0	0.1
RM20091963267			117.2			136.4			1.2
	0.022	2.2		0.04	4.4		0	0.1
RM20091965198			119.4			140.8			1.3
	0.027	2.7		0.05	5.3		0	0.1
RM20091962196			122.1			146.1			1.3
	0.019	1.9		0.04	3.7		0	0.1
RM20091961479			124			149.8			1.4
	0.004	0.4		0.01	0.7		0	0.1
RM20091965466			124.3			150.6			1.4
	0.023	2.3		0.04	4.4		0	0.1
RM20091960290			126.6			155			1.5
	0.011	1.1		0.02	2.2		0	0.1
RM20091960407			127.7			157.2			1.5
	0.013	1.3		0.03	2.6		0	0.1
OMM1573			129			159.8			1.6
	0.018	1.8		0.02	1.7		0.02	2.3
RM20091961750			130.8			161.5			3.8
	0.011	1.1		0.02	1.7		0.01	0.8
RM20091965648			131.9			163.1			4.6
	0.01	1		0.01	1.5		0.01	0.8
RM20091960846			132.8			164.6			5.4
	0.015	1.5		0.02	2.2		0.01	0.8
RM20091962579			134.3			166.8			6.2
	0.034	3.4		0.06	5.6		0.01	0.8
RM20091962564			137.7			172.3			7
	0.038	3.8		0.08	7.8		0	0.1
RM20091960231			141.6			180.1			7.1
	0.021	2.1		0.02	1.6		0.02	2.5
RM20091964685			143.6			181.7			9.6
	0.039	3.9		0.01	0.8		0.06	5.9
OMM1228			147.5			182.6			15.4
	0.05	5		0	0		0.05	4.9
RM20091960733			152.6			182.6			20.4
	0.075	7.6		0	0		0.08	7.6
RM20091962142			160.1			182.6			27.9
	0.289	33		0	0		0.29	33
OMY1INRA			193.2			182.6			61
There are 49 mar	kers in	unique	map po	sitions.

## Sheet: Omy3
Current map :
	Sex averaged map:			Sex specific maps:
	Theta	Kosambi	cM	Theta Female	Kosambi	cM	Theta Male	Kosambi	cM
RM20091965396			0			0			0
	0.036	3.6		0.04	3.6		0	0
RM20091965170			3.6			3.6			0
	0.017	1.7		0.02	1.7		0	0
RM20091964850			5.3			5.3			0
	0.064	6.4		0.06	6.4		0	0
RM20091961030			11.7			11.7			0
	0.018	1.8		0.02	1.8		0	0
RM20091961402			13.6			13.6			0
	0.049	4.9		0.05	4.9		0	0
RM20091964898			18.5			18.5			0
	0.056	5.6		0.05	5.5		0	0
OMM5121			24.1			24			0
	0.017	1.7		0.03	3		0	0
RM20091962103			25.8			27			0
	0.06	6		0.1	10.5		0	0
RM20091960763			31.8			37.5			0
	0.026	2.6		0.04	4.4		0	0
RM20091965732			34.4			41.9			0
	0.021	2.1		0.04	3.5		0	0
RM20091964102			36.5			45.5			0
	0.031	3.1		0.05	5.4		0	0
RM20091964217			39.6			50.8			0
	0.031	3.1		0.05	5.4		0	0
RM20091965453			42.7			56.2			0
	0.034	3.4		0.06	5.8		0	0
RM20091965810			46.1			62			0
	0.015	1.5		0.02	2.5		0	0
RM20091964205			47.5			64.5			0
	0.027	2.7		0.05	4.6		0	0
RM20091964774			50.2			69.1			0
	0.022	2.2		0.04	3.7		0	0
RM20091965745			52.4			72.8			0
	0.02	2		0.03	3.3		0	0
RM20091963638			54.4			76.2			0
	0.031	3.1		0.05	5.4		0	0
RM20091965755			57.5			81.5			0
	0.034	3.4		0.06	5.9		0	0
RM20091965336			60.9			87.4			0
	0.029	2.9		0.05	5		0	0
RM20091961985			63.9			92.5			0
	0.026	2.6		0.04	4.5		0	0
RM20091964079			66.5			97			0
	0.015	1.5		0.04	4.2		0	0
RM20091963365			68			101.1			0
	0.005	0.5		0.02	2.5		0	0
RM20091963105			68.5			103.6			0
	0.018	1.8		0.03	3.3		0	0
RM20091964618			70.3			106.9			0
	0.009	0.9		0.02	1.7		0	0
RM20091961981			71.2			108.6			0
	0.005	0.5		0.01	0.8		0	0
RM20091964459			71.7			109.4			0
	0.009	0.9		0.02	1.7		0	0
RM20091965734			72.6			111.1			0
	0.038	3.8		0.08	8.1		0	0
RM20091961001			76.4			119.2			0
	0.024	2.4		0.05	5.2		0	0
OMM5204			78.9			124.3			0
	0.009	0.9		0.02	1.6		0	0
RM20091965465			79.7			126			0
	0.026	2.6		0.05	5.1		0	0
RM20091960842			82.4			131.1			0
	0.013	1.3		0.03	2.6		0	0
OMM5324			83.7			133.6			0
	0.015	1.5		0.02	2.4		0.01	0.5
RM20091965758			85.1			136.1			0.5
	0.027	2.7		0.03	3.2		0.01	0.5
RM20091964463			87.9			139.2			1.1
	0.013	1.3		0.04	3.8		0	0.4
RM20091962840			89.2			143			1.4
	0.023	2.3		0.04	4.2		0	0.4
RM20091965432			91.5			147.2			1.8
	0.019	1.9		0.03	3.3		0	0.4
OMM5164			93.3			150.5			2.1
	0.005	0.5		0.01	0.9		0	0.1
RM20091960469			93.8			151.4			2.3
	0.012	1.2		0.02	2.2		0	0.1
RM20091963645			95			153.6			2.4
	0.024	2.4		0.05	4.5		0	0.1
RM20091965750			97.4			158.1			2.5
	0.014	1.4		0.05	5.1		0	0.1
RM20091962822			98.8			163.2			2.7
	0.041	4.1		0.09	9		0	0
RM20091963330			102.9			172.2			2.7
	0.014	1.4		0.03	3.2		0	0
RM20091964590			104.3			175.4			2.7
	0.027	2.7		0.05	5		0.01	0.7
RM20091960898			107			180.4			3.4
	0.021	2.1		0.03	3.2		0.01	1.1
RM20091965007			109.1			183.5			4.5
	0.026	2.6		0.04	3.8		0.01	1.1
RM20091962012			111.7			187.4			5.6
	0.052	5.2		0.07	7.4		0.02	2.4
OMM3120			116.9			194.8			8
	0.013	1.3		0.02	2.5		0	0
RM20091962602			118.2			197.2			8
	0.007	0.7		0.01	1.2		0	0
RM20091960203			118.9			198.5			8
	0.006	0.6		0.01	1.1		0	0
OMM5005			119.5			199.6			8
	0.032	3.2		0.02	1.5		0.06	5.8
RM20091962488			122.7			201.1			13.7
	0.04	4		0.03	2.8		0.06	5.8
OMM1337			126.7			203.9			19.5
	0.135	13.8		0.02	2.1		0.25	26.9
OMM1599			140.5			206			46.4
There are 54 mar	kers in	unique	map po	sitions	.

## Sheet: Omy4
Current map :
	Sex averaged map:			Sex specific maps:
	Theta	Kosambi	cM	Theta Female	Kosambi	cM	Theta Male	Kosambi	cM
RM20091960585			0			0			0
	0.085	8.6		0.09	9		0	0
RM20091963079			8.6			9			0
	0.107	10.9		0.04	4.4		0.17	17.8
RM20091961147			19.5			13.4			17.8
	0.036	3.6		0.02	1.8		0.1	10.3
OMM1194			23.1			15.2			28.1
	0.091	9.2		0.05	5.4		0.1	10.3
RM20091960102			32.2			20.6			38.3
	0.096	9.7		0.09	9		0.1	10
RM20091961816			41.9			29.6			48.3
	0.035	3.5		0.07	6.7		0	0.2
RM20091963317			45.4			36.3			48.5
	0.014	1.4		0.02	2.2		0	0.2
RM20091960400			46.8			38.5			48.8
	0.014	1.4		0.02	2.2		0	0.2
RM20091963582			48.2			40.7			49
	0.013	1.3		0.02	2		0	0.2
RM20091960399			49.5			42.7			49.3
	0.022	2.2		0.03	3.5		0	0.2
RM20091963039			51.7			46.2			49.5
	0.03	3		0.05	4.7		0	0.2
RM20091965226			54.7			50.9			49.8
	0.008	0.8		0.01	1.1		0	0.2
OMM1211			55.5			52.1			50
	0.028	2.8		0.05	5.3		0	0.1
RM20091964758			58.2			57.3			50.1
	0.025	2.5		0.05	4.8		0	0.1
RM20091963177			60.8			62.1			50.3
	0.004	0.4		0.01	0.8		0	0.1
RM20091963740			61.2			62.9			50.4
	0.017	1.7		0.03	3.2		0	0.1
RM20091963549			62.9			66.1			50.6
	0.005	0.5		0.02	1.6		0	0.1
RM20091962688			63.3			67.6			50.7
	0.015	1.5		0.03	3.3		0	0
RM20091961701			64.9			70.9			50.7
	0.01	1		0.02	2.2		0	0
RM20091960871			65.9			73.1			50.8
	0.027	2.7		0.06	5.7		0	0.1
RM20091960553			68.6			78.8			50.9
	0.042	4.2		0.08	8		0	0.1
RM20091962590			72.7			86.8			50.9
	0.019	1.9		0.04	3.5		0	0.1
RM20091960458			74.6			90.3			51
	0.026	2.6		0.05	5		0	0.1
RM20091965960			77.3			95.2			51.1
	0.014	1.4		0.03	2.7		0	0.1
RM20091964985			78.7			97.9			51.2
	0.013	1.3		0.04	4		0	0.1
RM20091962998			80			101.9			51.2
	0.004	0.4		0.02	2.4		0	0
RM20091965026			80.4			104.3			51.2
	0.008	0.8		0.02	1.6		0	0
RM20091960369			81.2			105.8			51.2
	0.012	1.2		0.02	2.4		0	0
RM20091963859			82.4			108.2			51.2
	0.016	1.6		0.03	3.2		0	0
RM20091960939			84			111.4			51.2
	0.028	2.8		0.06	5.6		0	0
RM20091961161			86.8			117			51.2
	0.028	2.8		0.06	5.6		0	0
OMM1298			89.7			122.5			51.2
	0.049	5		0.1	10.1		0	0
RM20091963710			94.6			132.7			51.2
	0.029	2.9		0.06	5.8		0	0
RM20091961749			97.5			138.4			51.2
	0.018	1.8		0.04	3.6		0	0
OMY4DIAS			99.3			142			51.2
	0.006	0.6		0.01	1.3		0	0
RM20091962466			99.9			143.3			51.2
	0.04	4		0.08	8.1		0	0
RM20091964623			103.9			151.4			51.2
	0.019	1.9		0.04	3.8		0	0
OMM1449			105.8			155.1			51.2
	0.004	0.4		0.01	0.8		0	0.1
RM20091963335			106.2			155.9			51.3
	0.012	1.2		0.02	2.3		0	0.1
RM20091960776			107.4			158.2			51.4
	0.012	1.2		0.02	2.3		0	0.1
RM20091962704			108.6			160.5			51.5
	0.016	1.6		0.03	3.1		0	0.1
RM20091963477			110.2			163.5			51.6
	0.013	1.3		0.02	2.4		0	0.1
RM20091964989			111.4			166			51.7
	0.109	11		0.22	23.6		0	0.1
RM20091964926			122.5			189.5			51.8
	0.016	1.6		0.03	3		0.01	0.5
OMM1322			124.1			192.5			52.3
	0.011	1.1		0.03	2.6		0	0
AlnTUF			125.2			195.2			52.3
	0.03	3		0.01	1.2		0.04	4.1
RM20091965951			128.1			196.4			56.4
	0.009	0.9		0.02	1.6		0	0
RM20091965772			129.1			198			56.4
	0.007	0.7		0.01	0.7		0	0
RM20091960611			129.8			198.8			56.4
	0.035	3.5		0.04	3.5		0	0
RM20091962315			133.3			202.3			56.4
	0.033	3.3		0.03	3.4		0	0
OMM1408			136.5			205.7			56.4
	0.06	6		0.06	6		0	0
RM20091961286			142.5			211.6			56.4
	0.033	3.3		0.03	3.3		0	0
RM20091964248			145.8			214.9			56.4
	0.016	1.6		0.02	1.6		0	0
RM20091960661			147.5			216.6			56.4
	0.017	1.7		0.02	1.7		0	0
RM20091960905			149.1			218.2			56.4
There are 55 mar	kers i	n unique	map po	sitions.

## Sheet: Omy5
Current map :
	Sex averaged map:			Sex specific maps:
	Theta	Kosambi	cM	Theta Female	Kosambi	cM	Theta Male	Kosambi	cM
RM20091964503			0			0			0
	0.113	11.5		0.12	12.3		0	0
OMM1075			11.5			12.3			0
	0.093	9.4		0	0		0.19	20.4
RM20091963827			20.9			12.3			20.4
	0.041	4.1		0	0		0.08	8.4
RM20091962740			25			12.3			28.8
	0.084	8.5		0	0		0.17	18.1
RM20091965908			33.5			12.3			46.9
	0.029	2.9		0	0		0.06	6
OMM1636			36.4			12.3			53
	0.026	2.6		0.01	0.9		0.05	5.3
RM20091964902			39			13.2			58.2
	0.03	3		0.05	4.7		0.01	0.9
RM20091963801			42			17.9			59.1
	0.022	2.2		0.05	4.9		0	0
RM20091965349			44.2			22.9			59.1
	0.011	1.1		0.02	1.8		0	0
OMM1516			45.3			24.7			59.1
	0.02	2		0.03	3		0	0
RM20091961409			47.3			27.7			59.1
	0.008	0.8		0.02	2		0	0
OMM1508			48.1			29.7			59.1
	0.004	0.4		0.01	1		0	0
RM20091961268			48.6			30.7			59.1
	0.005	0.5		0.01	0.8		0	0
RM20091963758			49.1			31.5			59.2
	0.021	2.1		0.03	3.1		0	0
RM20091961314			51.1			34.7			59.2
	0.004	0.4		0.01	0.7		0	0
RM20091963661			51.6			35.3			59.2
	0.014	1.4		0.02	2.1		0	0
RM20091960894			53			37.4			59.2
	0.041	4.2		0.06	6.3		0	0
RM20091961430			57.1			43.8			59.3
	0.013	1.3		0.02	2		0	0
RM20091965285			58.4			45.7			59.3
	0.009	0.9		0.01	1.3		0	0
RM20091964210			59.3			47			59.3
	0.009	0.9		0.01	1.3		0	0
RM20091961890			60.1			48.3			59.3
	0.006	0.6		0.01	0.8		0	0
OMM3111			60.8			49.2			59.4
	0.007	0.7		0.02	2.2		0	0
RM20091960784			61.5			51.4			59.4
	0.032	3.2		0.05	4.8		0.02	2
RM20091960831			64.7			56.2			61.4
	0.042	4.2		0.09	9		0	0.2
RM20091963456			68.9			65.2			61.6
	0.023	2.3		0.04	4.1		0	0.2
RM20091962168			71.2			69.3			61.9
	0.005	0.5		0.01	0.8		0	0.2
RM20091962951			71.7			70.1			62.1
	0.014	1.4		0.02	2.4		0	0.2
RM20091963768			73.1			72.5			62.3
	0.019	1.9		0.03	3.3		0	0.2
RM20091960116			75			75.8			62.5
	0.026	2.6		0.05	4.6		0	0.2
RM20091964770			77.5			80.4			62.7
	0.021	2.1		0.04	3.6		0	0.2
RM20091964560			79.6			84			62.9
	0.009	0.9		0.02	1.6		0	0.2
RM20091964984			80.5			85.6			63.1
	0.005	0.5		0.01	0.8		0	0.3
RM20091960824			81			86.5			63.3
	0.005	0.5		0.01	0.8		0	0.3
RM20091961612			81.6			87.3			63.6
	0.01	1		0.02	1.6		0	0.3
RM20091965077			82.6			88.9			63.8
	0.02	2		0.03	3.3		0	0.3
RM20091962365			84.6			92.2			64.1
	0.03	3.1		0.05	4.9		0	0.3
RM20091962124			87.7			97.1			64.4
	0.005	0.5		0.01	0.8		0	0.3
RM20091962878			88.2			97.9			64.6
	0.015	1.5		0.02	2.4		0	0.3
RM20091960418			89.7			100.3			64.9
	0.124	12.6		0.22	23		0	0.3
RM20091964867			102.4			123.3			65.1
	0.104	10.5		0.21	22.3		0	0.3
RM20091960403			112.9			145.6			65.4
	0.066	6.6		0.09	9.3		0.03	2.6
RM20091962555			119.5			154.9			67.9
	0.047	4.7		0.1	9.7		0	0.3
RM20091961588			124.2			164.6			68.2
	0.016	1.6		0.04	3.8		0	0.3
RM20091963930			125.8			168.4			68.6
	0.015	1.5		0.02	2.4		0.01	0.6
RM20091964377			127.3			170.8			69.1
	0.015	1.5		0.03	3.3		0	0
RM20091964089			128.9			174			69.1
	0.011	1.1		0.02	2.4		0	0
RM20091963981			130			176.5			69.1
	0.015	1.5		0.02	2.4		0.01	0.5
RM20091963804			131.5			178.9			69.6
	0.029	2.9		0.05	5.4		0.01	0.5
OMM1439			134.4			184.3			70.2
	0.016	1.6		0.03	3.3		0	0
RM20091965819			136			187.6			70.2
	0.03	3		0.07	6.8		0	0
RM20091961708			139			194.4			70.2
	0.044	4.4		0.09	8.7		0	0
OMM5035			143.4			203.1			70.2
	0.016	1.6		0.03	2.7		0	0.3
RM20091962776			145			205.8			70.5
	0.013	1.3		0.02	2.3		0	0.3
RM20091962618			146.3			208.1			70.8
	0.004	0.4		0.01	0.8		0	0.3
RM20091962764			146.8			208.9			71.2
	0.024	2.4		0.04	4.2		0	0.3
RM20091960167			149.2			213.1			71.5
	0.043	4.3		0.08	7.6		0	0.3
RM20091963654			153.5			220.8			71.8
	0.032	3.2		0.06	6.3		0	0.3
RM20091964585			156.8			227.1			72.2
	0.011	1.1		0.02	2.3		0	0
RM20091961610			157.8			229.5			72.2
	0.017	1.7		0.05	4.6		0	0.2
RM20091963775			159.6			234.1			72.3
	0.015	1.5		0.03	2.6		0	0.2
RM20091965282			161			236.6			72.5
	0.015	1.5		0.03	2.6		0	0.2
RM20091963425			162.5			239.2			72.7
	0.005	0.5		0.01	0.9		0	0.2
OMM1660			163			240.1			72.8
	0.008	0.8		0.01	1.1		0.01	0.7
RM20091965056			163.7			241.2			73.5
	0.02	2		0	0		0.04	3.5
OMM5025			165.7			241.2			77
	0.039	3.9		0	0		0.07	7.3
RM20091964077			169.7			241.2			84.4
	0.081	8.2		0	0		0.16	17.1
OMM1774			177.9			241.2			101.4
	0.128	13.1		0	0		0.12	12.7
RM20091964202			190.9			241.2			114.1
	0.071	7.2		0	0		0.07	7.1
RM20091964751			198.1			241.2			121.2
	0.041	4.1		0	0		0.04	4.1
RM20091963901			202.2			241.2			125.4
There are 70 mar	kers i	n unique	map po	sitions	.

## Sheet: Omy6
Current map :
	Sex averaged map:			Sex specific maps:
	Theta	Kosambi	cM	Theta Female	Kosambi	cM	Theta Male	Kosambi	cM
RM20091960212			0			0			0
	0.22	23.6		0.23	24.2		0	0
RM20091961885			23.6			24.2			0
	0.171	17.9		0	0		0.31	36.7
OMM5306			41.5			24.3			36.7
	0.1	10.1		0.06	6.4		0.13	12.9
RM20091960677			51.6			30.6			49.7
	0.039	3.9		0.07	6.8		0.02	1.9
OMM5254			55.5			37.4			51.5
	0.018	1.8		0.03	3.2		0	0.3
RM20091964665			57.3			40.6			51.8
	0.011	1.1		0.02	1.9		0	0.3
OMM5316			58.4			42.6			52
	0.02	2		0.04	3.6		0	0.3
RM20091964593			60.4			46.2			52.3
	0.005	0.5		0.01	0.9		0	0.3
RM20091964290			60.9			47.1			52.6
	0.029	2.9		0.05	5.2		0	0.3
RM20091962314			63.8			52.3			52.9
	0.008	0.8		0.02	1.5		0	0.3
RM20091960683			64.6			53.9			53.2
	0.021	2.1		0.04	3.7		0	0.3
RM20091964674			66.7			57.6			53.5
	0.025	2.5		0.04	4.5		0	0.3
RM20091960120			69.2			62.1			53.8
	0.021	2.1		0.04	3.7		0	0.3
ONE10ASC			71.3			65.8			54.1
	0.012	1.2		0.02	2.1		0	0.2
RM20091964313			72.5			67.9			54.3
	0.018	1.8		0.03	3.1		0	0.2
OMM1749			74.4			71			54.6
	0.008	0.8		0.01	1.4		0	0.2
RM20091961747			75.2			72.4			54.8
	0.012	1.2		0.03	3		0	0.2
RM20091963321 *			76.4			75.4			55
	0.01	1		0.01	1.4		0.01	0.5
RM20091965799			77.4			76.8			55.5
	0.01	1		0.01	1.4		0.01	0.5
RM20091963245 *			78.4			78.2			56.1
	0.037	3.7		0.07	6.8		0.01	0.6
RM20091964781			82.1			85			56.7
	0.047	4.7		0.1	9.8		0.01	0.5
RM20091964183			86.8			94.8			57.2
	0.026	2.6		0.04	4.3		0.01	0.5
OMY1225UW			89.4			99.1			57.8
	0.012	1.2		0.02	2.3		0	0
RM20091963417			90.6			101.4			57.8
	0.009	0.9		0.02	1.7		0	0
OMM1768			91.5			103.1			57.8
	0.005	0.5		0.01	1		0	0
RM20091960148			91.9			104.1			57.8
	0.014	1.4		0.03	2.9		0	0
RM20091965502			93.4			107			57.8
	0.01	1		0.02	1.9		0	0
RM20091965910			94.3			108.9			57.8
	0.014	1.4		0.03	2.9		0	0
RM20091962241			95.8			111.8			57.8
	0.014	1.4		0.03	2.9		0	0
RM20091964733			97.2			114.7			57.8
	0.014	1.4		0.03	2.9		0	0
RM20091965119			98.7			117.6			57.8
	0.005	0.5		0.01	1		0	0
OMM1753			99.1			118.6			57.8
	0.005	0.5		0.01	0.8		0	0.3
RM20091960225			99.6			119.3			58.1
	0.006	0.6		0.01	0.9		0	0.3
RM20091965051			100.2			120.2			58.3
	0.032	3.2		0.05	4.8		0	0.3
RM20091962566			103.4			125			58.6
	0.012	1.2		0.04	3.5		0	0.3
RM20091963937			104.6			128.6			58.9
	0.039	3.9		0.06	6.1		0.02	1.6
RM20091960754 *			108.5			134.7			60.4
	0.017	1.7		0.05	4.8		0	0.2
RM20091963690			110.3			139.5			60.6
	0.05	5		0.1	9.8		0	0.2
RM20091964603			115.3			149.4			60.8
	0.009	0.9		0.02	1.8		0	0.2
OMM1628			116.2			151.1			60.9
	0.034	3.4		0.06	6.5		0	0
RM20091961385			119.6			157.7			60.9
	0.016	1.6		0.03	3		0	0
RM20091961516			121.2			160.7			60.9
	0.015	1.5		0.03	2.9		0	0
OMY1002UW			122.7			163.6			60.9
	0.005	0.5		0.01	1		0	0
OMM1214			123.2			164.6			60.9
	0.008	0.8		0.02	1.6		0	0
OMM1465			124			166.2			60.9
	0.018	1.8		0.02	1.8		0	0
RM20091963358			125.8			168			60.9
	0.206	21.9		0.21	21.8		0	0
RM20091963641			147.7			189.8			60.9
There are 47 mar	kers i	n unique	map po	sitions	.

## Sheet: Omy7
Current map :
	Sex averaged map:			Sex specific maps:
	Theta	Kosambi	cM	Theta Female	Kosambi	cM	Theta Male	Kosambi	cM
RM20091962659			0			0			0
	0.113	11.5		0.11	11.5		0	0
RM20091960265			11.5			11.5			0
	0.042	4.2		0.04	4.2		0	0
RM20091961356			15.7			15.7			0
	0.055	5.5		0.05	5.5		0	0
RM20091964687			21.2			21.2			0
	0.066	6.7		0.07	6.7		0	0
RM20091960696			27.9			27.9			0
	0.05	5.1		0.05	5.1		0	0
RM20091962824			32.9			32.9			0
	0.029	2.9		0.03	2.9		0	0
RM20091963845			35.8			35.8			0
	0.048	4.8		0.05	4.8		0	0
RM20091962462			40.7			40.7			0
	0.033	3.3		0.03	3.3		0	0
RM20091962146			44			44			0
	0.09	9.1		0.09	9.1		0	0
RM20091964520			53.1			53.1			0
	0.056	5.6		0.06	5.6		0	0
RM20091962547			58.7			58.7			0
	0.016	1.6		0.02	1.9		0.02	1.8
OMM1513			60.4			60.6			1.8
	0.007	0.7		0.01	1.3		0	0
RM20091960415			61.1			61.9			1.8
	0.007	0.7		0.01	1.3		0	0
OMM5233			61.8			63.2			1.8
	0.008	0.8		0.02	1.5		0	0
OMM1158			62.5			64.7			1.8
	0.004	0.4		0.01	0.7		0	0
RM20091963902			62.9			65.4			1.8
	0.004	0.4		0.01	0.9		0	0
RM20091963889			63.3			66.3			1.8
	0.018	1.8		0.04	3.5		0	0
RM20091962514			65.1			69.9			1.8
	0.015	1.5		0.03	3		0	0
RM20091964127			66.6			72.8			1.8
	0.015	1.5		0.03	3		0	0
RM20091965695			68			75.8			1.8
	0.007	0.7		0.01	1.5		0	0
OMM1236			68.8			77.2			1.8
	0.015	1.5		0.03	2.5		0.01	0.5
RM20091963370			70.3			79.8			2.3
	0.039	3.9		0.08	7.6		0.01	0.5
RM20091961634			74.2			87.4			2.9
	0.007	0.7		0.02	1.9		0.01	0.5
RM20091961099			74.9			89.3			3.4
	0.023	2.3		0.03	3.5		0.01	0.5
RM20091964987			77.2			92.8			3.9
	0.008	0.8		0.01	1.3		0.01	0.5
RM20091961559			78.1			94.1			4.5
	0.03	3		0.05	4.8		0.01	0.5
RM20091964646			81.1			98.9			5
	0.032	3.2		0.04	3.8		0.02	1.5
OMM1277			84.3			102.7			6.6
	0.019	1.9		0.02	2.1		0.02	1.5
RM20091960206			86.2			104.7			8.1
	0.005	0.5		0.01	1		0	0.1
RM20091964930			86.7			105.8			8.2
	0.01	1		0.02	1.9		0	0.1
RM20091964410			87.7			107.7			8.3
	0.01	1		0.02	1.9		0	0.1
RM20091962357			88.7			109.6			8.4
	0.014	1.4		0.03	2.8		0	0.1
RM20091960571			90.1			112.4			8.5
	0.01	1		0.02	1.8		0	0.1
RM20091960916			91.1			114.2			8.5
	0.024	2.4		0.05	4.6		0	0.1
RM20091965570			93.5			118.8			8.6
	0.004	0.4		0.01	0.8		0	0
RM20091964372			93.9			119.6			8.6
	0.016	1.6		0.03	3.1		0	0
RM20091964088			95.4			122.7			8.6
	0.004	0.4		0.01	0.9		0	0
OMM3056			95.9			123.6			8.6
	0.014	1.4		0.03	2.9		0	0.1
RM20091963204			97.2			126.5			8.7
	0.026	2.6		0.04	3.6		0.01	1.4
RM20091960030			99.8			130.1			10.1
	0.03	3		0.06	5.6		0.01	0.6
RM20091965571			102.7			135.7			10.7
	0.038	3.8		0.07	7.3		0.01	0.6
OMM1557			106.5			143			11.3
	0.004	0.4		0.01	0.7		0	0.1
RM20091963231			106.9			143.7			11.4
	0.008	0.8		0.01	1.3		0	0.1
RM20091964206			107.7			145			11.5
	0.011	1.1		0.02	1.9		0	0.1
RM20091962362			108.8			146.9			11.6
	0.015	1.5		0.03	2.6		0	0.1
RM20091960279			110.3			149.5			11.7
	0.008	0.8		0.01	1.3		0	0.1
OMM1642			111.1			150.8			11.8
	0.008	0.8		0.02	1.9		0	0.1
RM20091960434			111.9			152.7			11.9
	0.011	1.1		0.03	2.6		0	0.2
RM20091960367			112.9			155.3			12
	0.015	1.5		0.03	2.8		0	0.2
RM20091965963			114.4			158.1			12.2
	0.019	1.9		0.03	3.5		0	0.2
RM20091960729			116.3			161.6			12.3
	0.026	2.6		0.05	5		0	0.2
RM20091961903			119			166.6			12.5
	0.058	5.8		0.11	11		0	0.2
OMM1662			124.8			177.6			12.6
	0.013	1.3		0.02	2.2		0	0
RM20091963916			126.1			179.8			12.6
	0.006	0.6		0.01	0.9		0	0
RM20091965450			126.7			180.7			12.6
	0.007	0.7		0.02	2.2		0	0
RM20091960719			127.4			182.9			12.6
	0.022	2.2		0.04	4.2		0	0
RM20091961625			129.6			187.1			12.6
	0.015	1.5		0	0		0.03	2.7
OMM1155			131.1			187.1			15.3
	0.026	2.6		0.06	6.1		0.02	1.8
OMM1234			133.7			193.2			17.1
	0.057	5.7		0	0		0.08	8.3
RM20091964916			139.4			193.2			25.4
	0.012	1.2		0	0		0.03	2.7
RM20091965573			140.6			193.2			28
	0.054	5.4		0	0		0.1	10.3
RM20091964443			146			193.2			38.3
	0.189	19.9		0	0		0.34	41.5
RM20091961446			165.9			193.3			79.8
There are 63 mar	kers i	n unique	map po	sitions	.

[truncated: 22 more sheets: Omy8, Omy9, Omy10, Omy11, Omy12, Omy13, Omy14, Omy15, Omy16, Omy17, Omy18, Omy19, Omy20, Omy21, Omy22, Omy23, Omy24, Omy25, Omy26, Omy27 …]
